# Supplementary material
Source: PubMed Central journal article supplement (PMC4564951)

Mean systolic arterial pressure  
(Non-invasive blood pressure)

HMGU

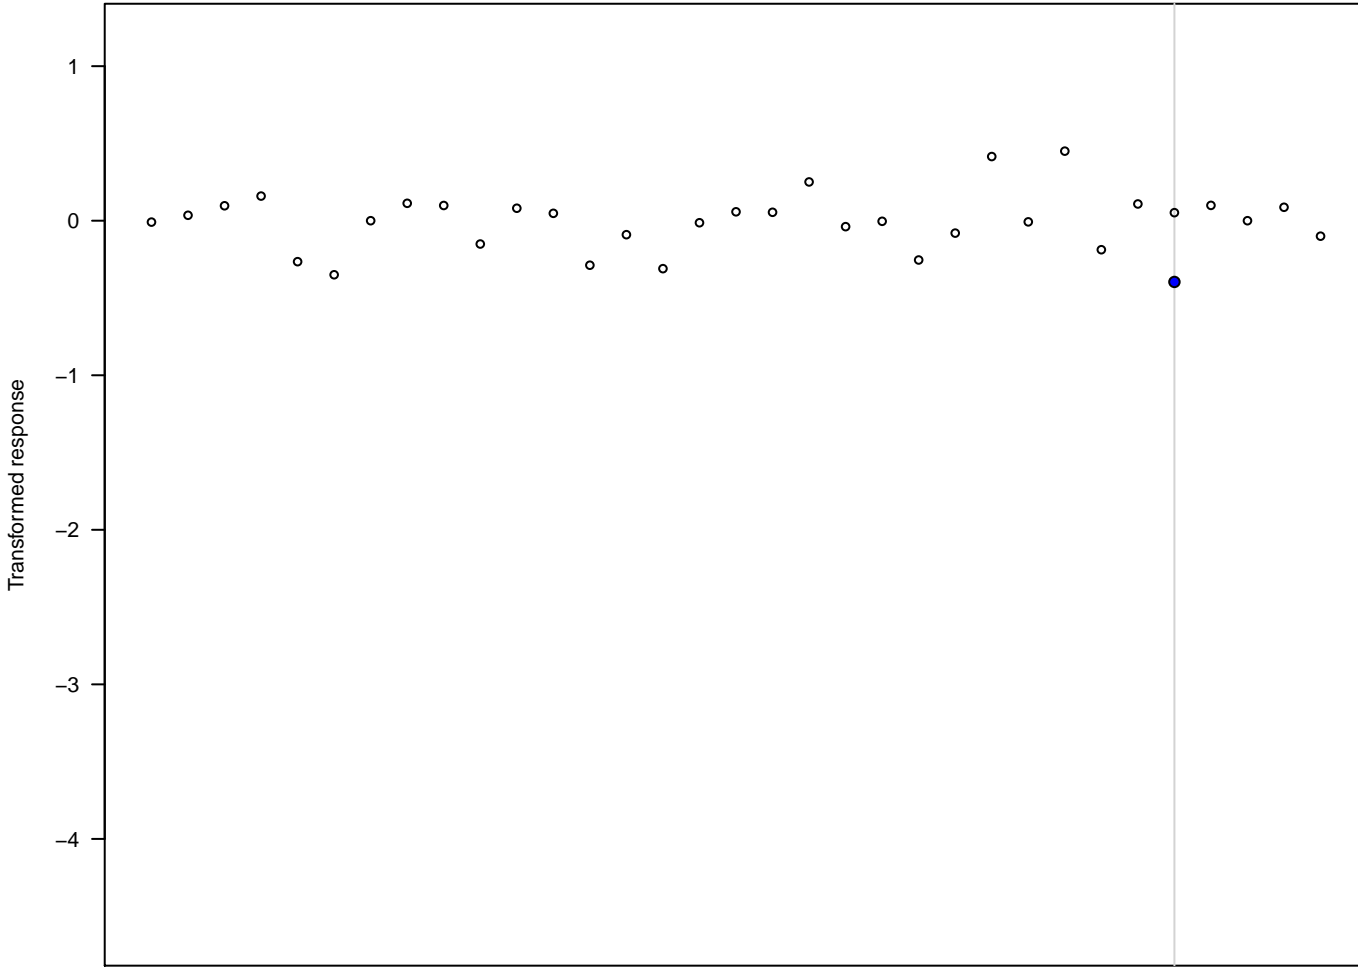

MRC Harwell

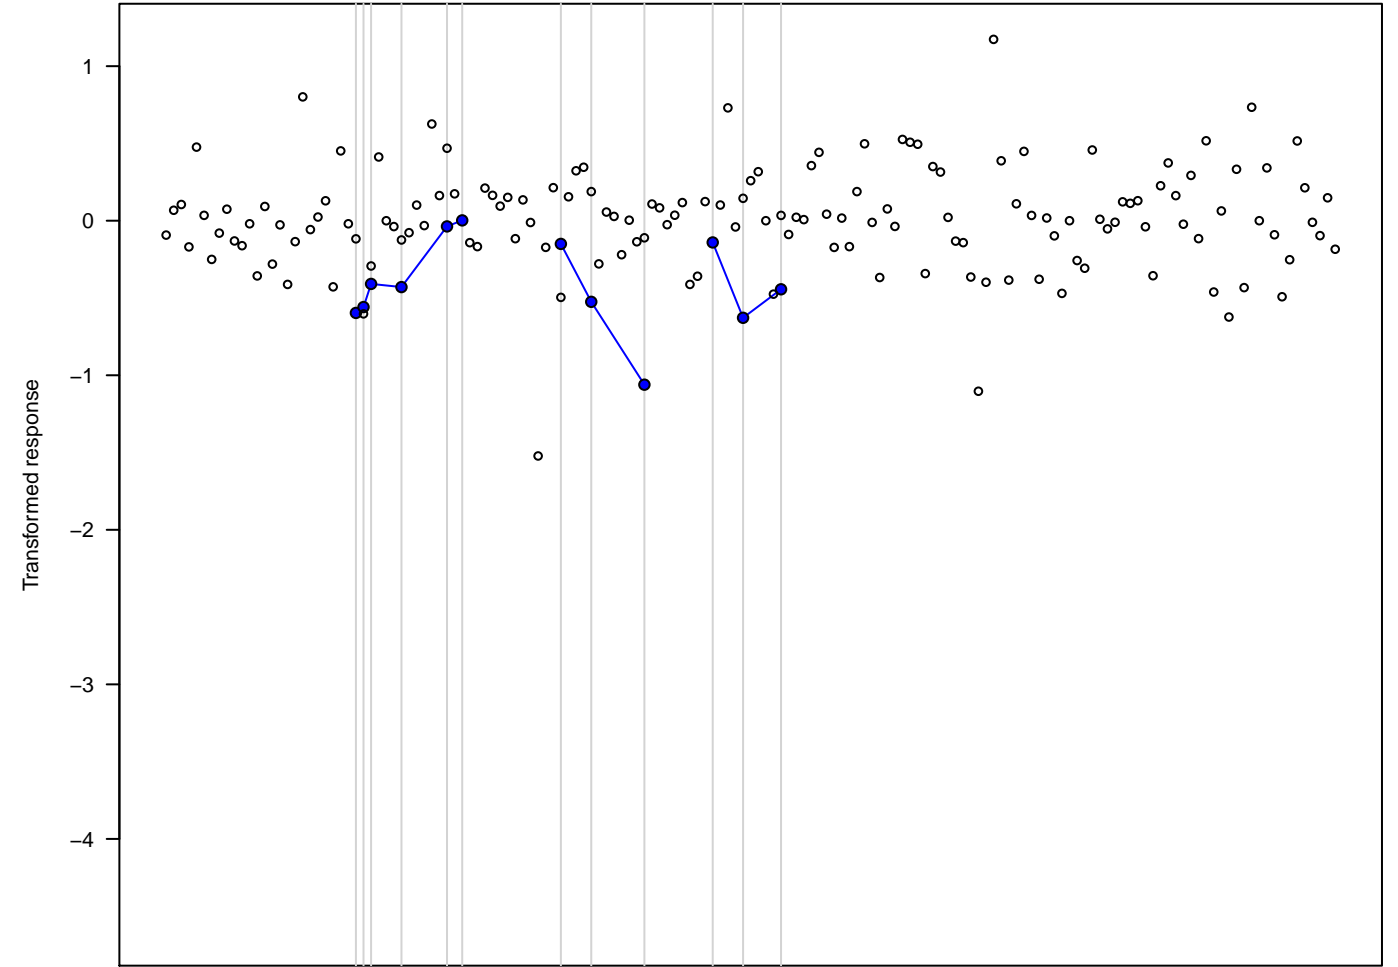

WTSI

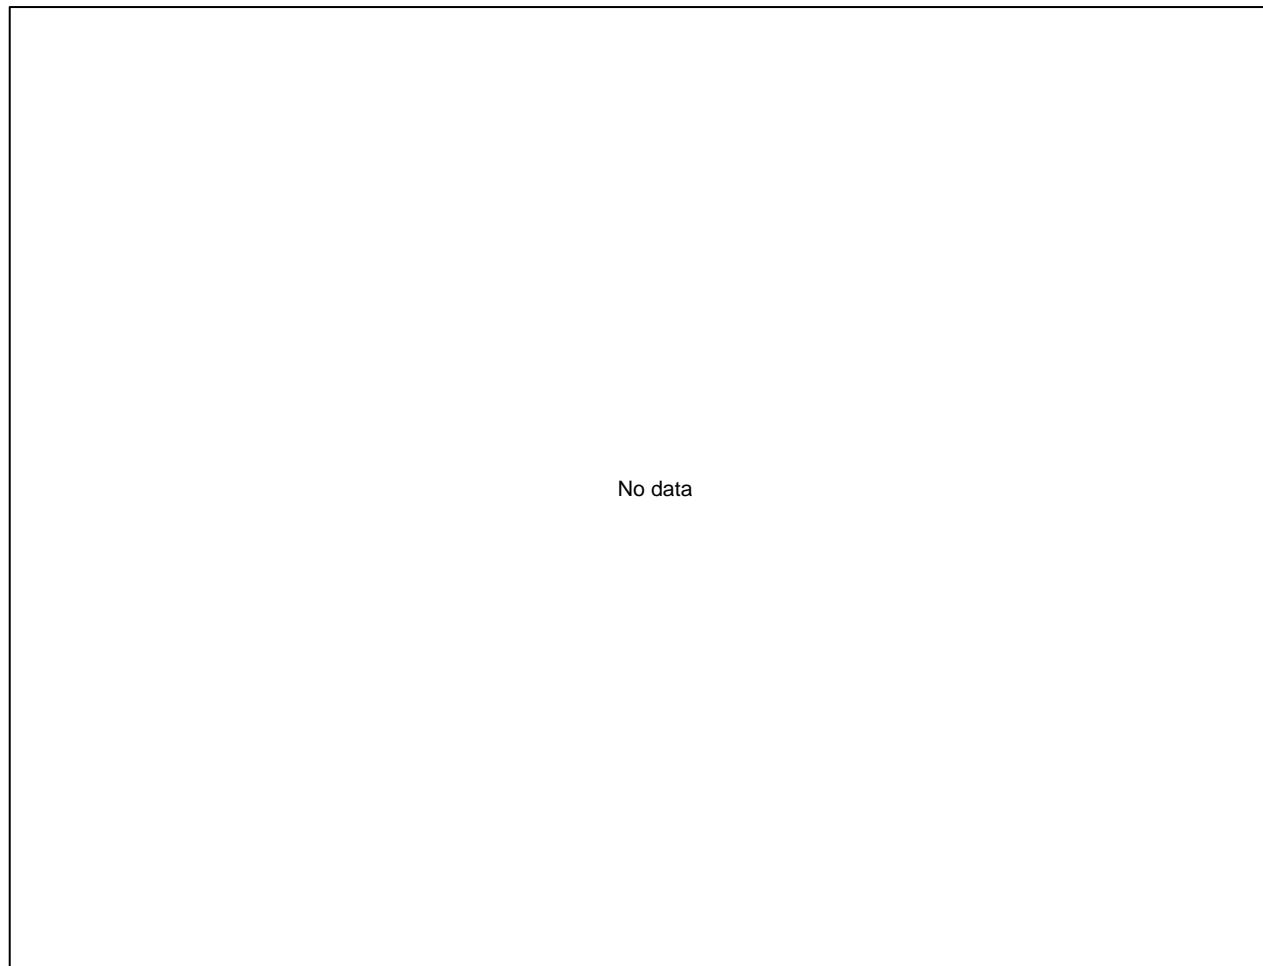

ICS

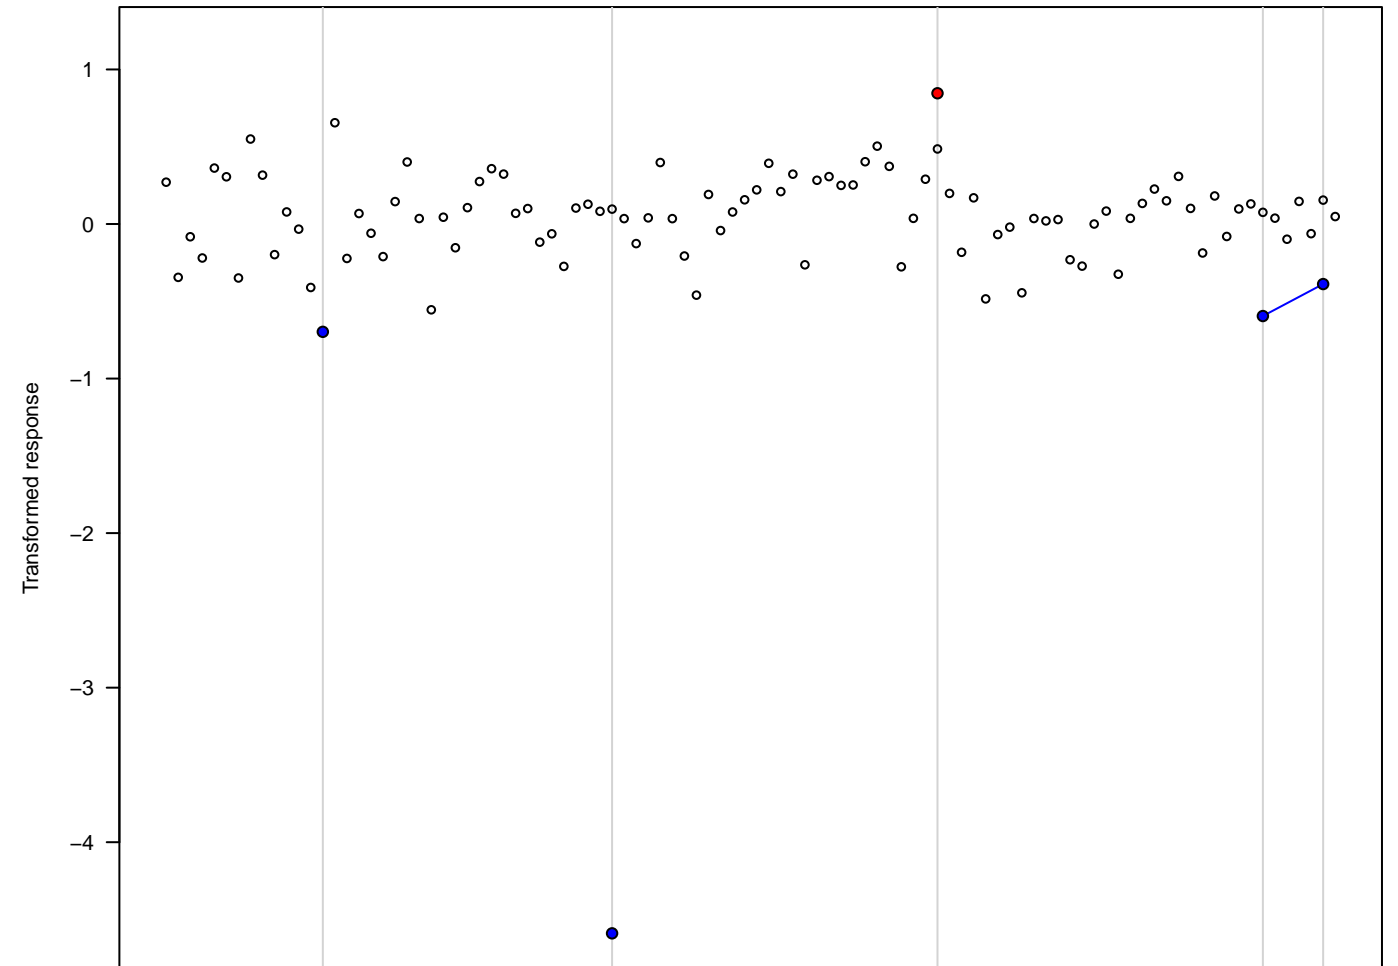

Mean pulse rate  
(Non-invasive blood pressure)

HMGU

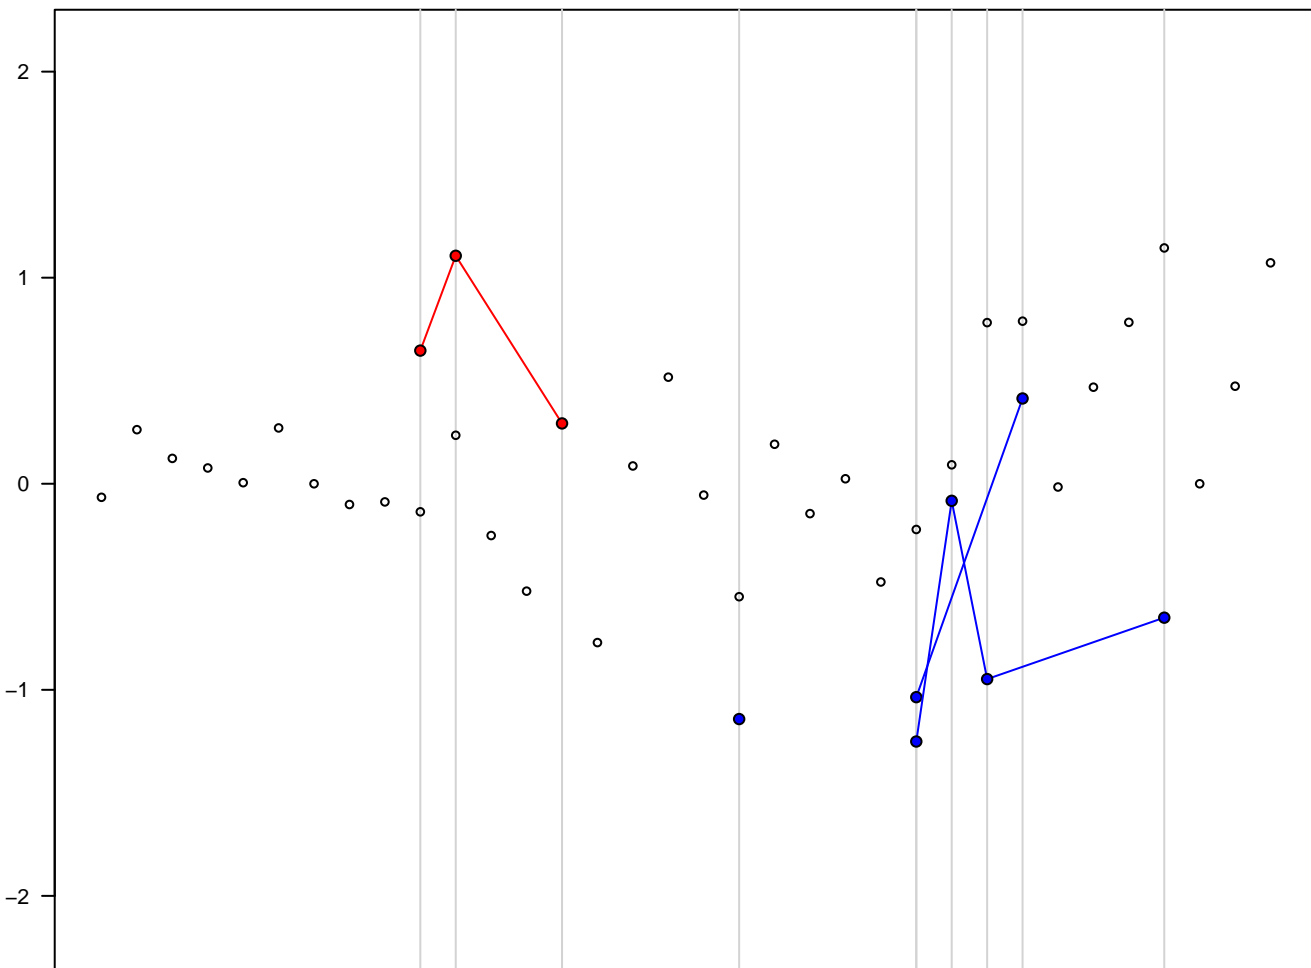

MRC Harwell

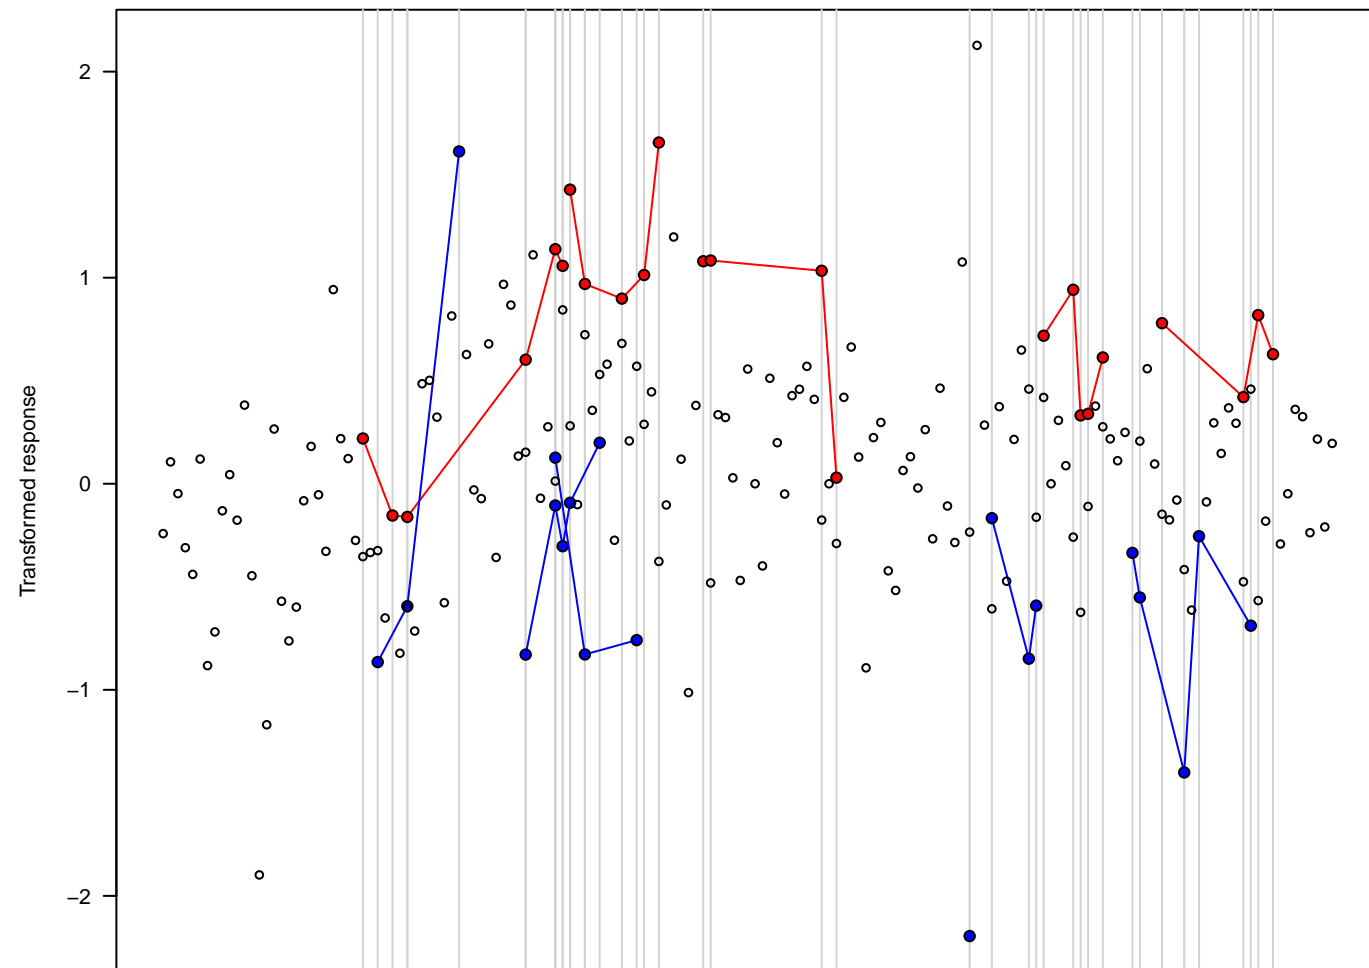

WTSI

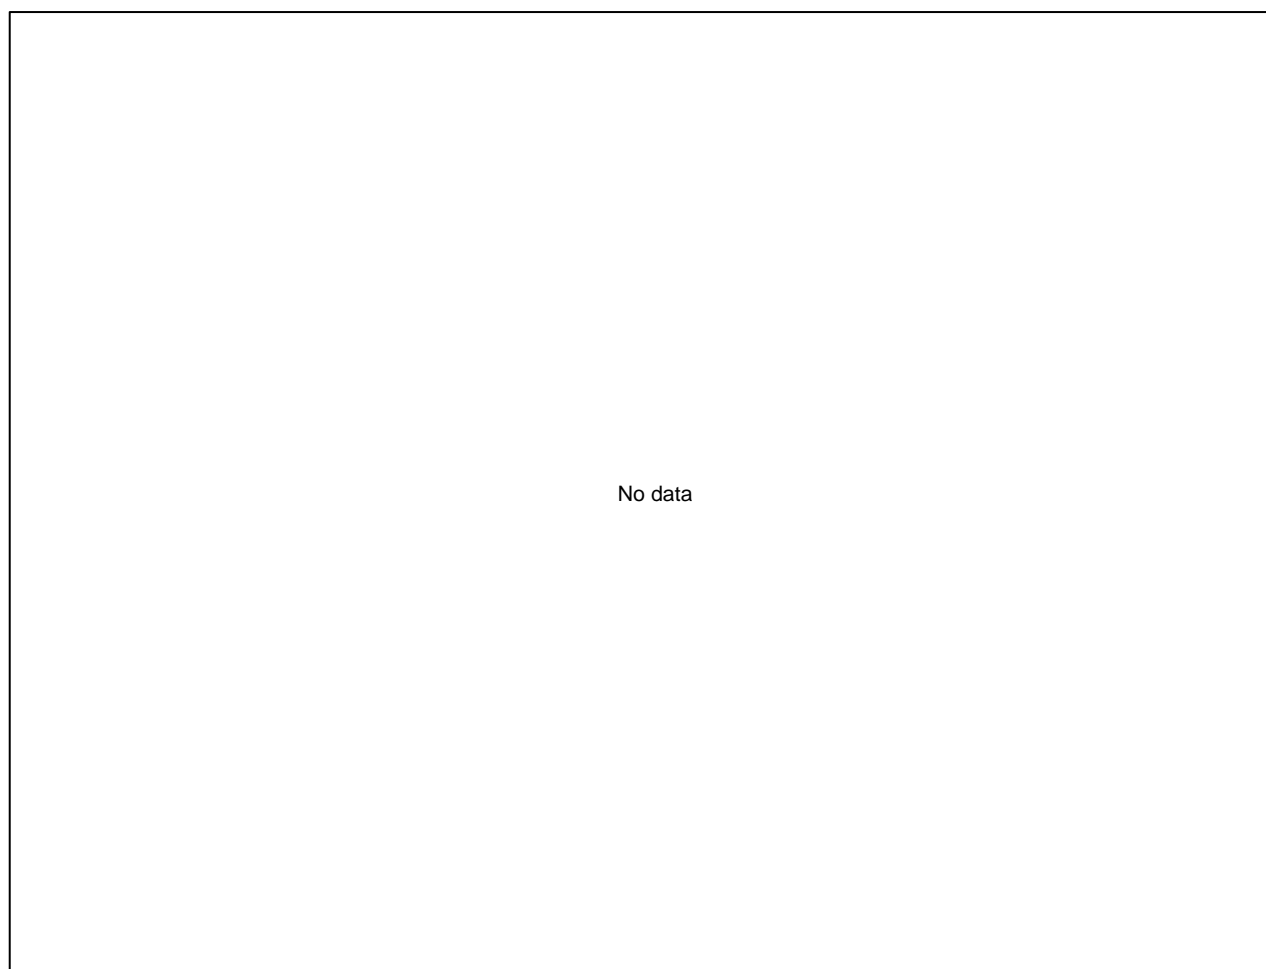

ICS

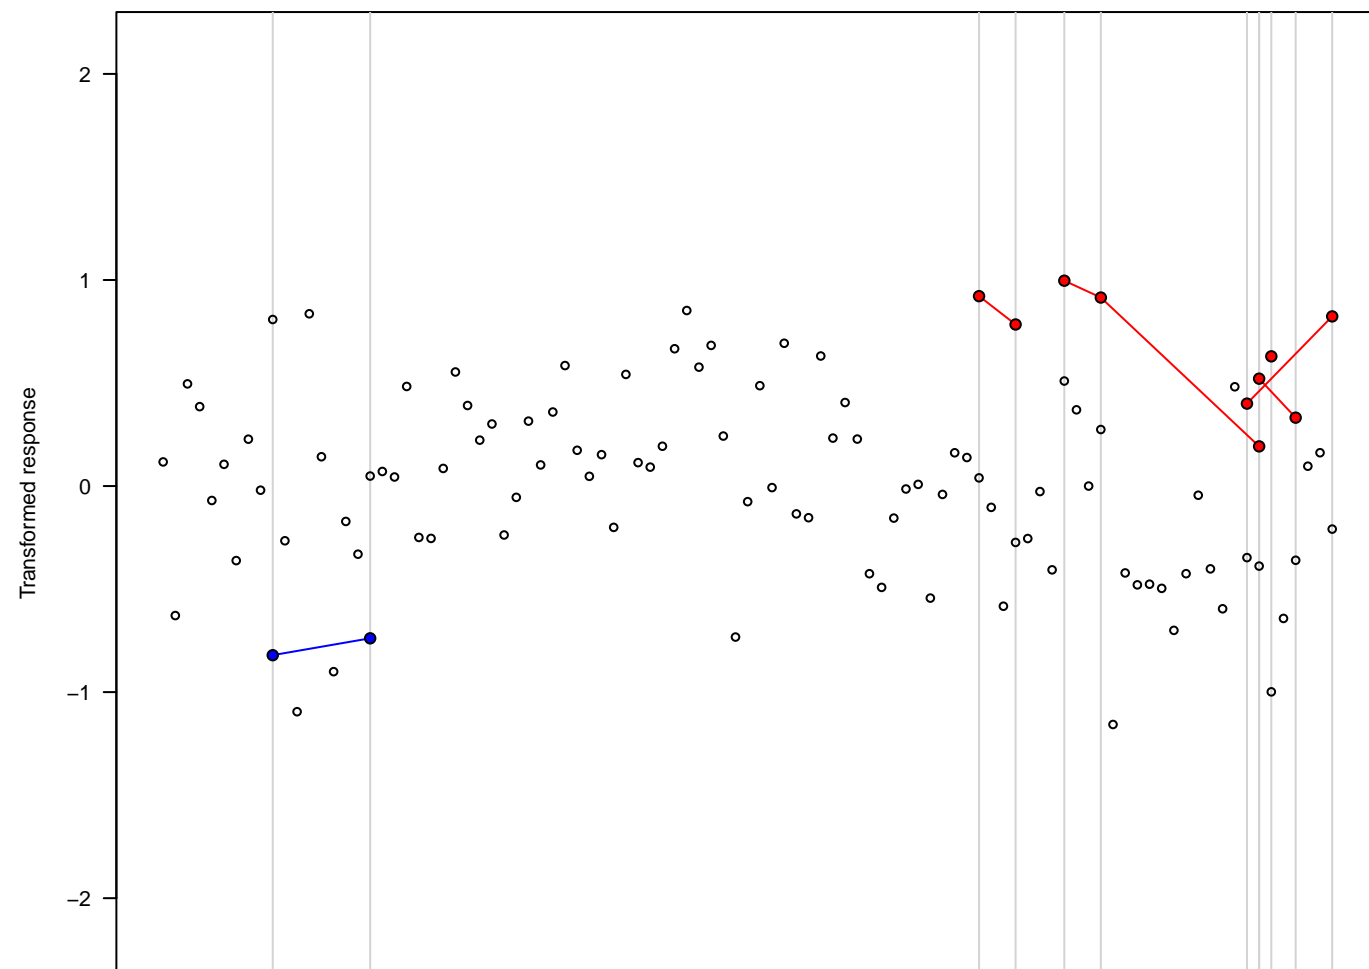

Body mass after experiment  
(Calorimetry)

HMGU

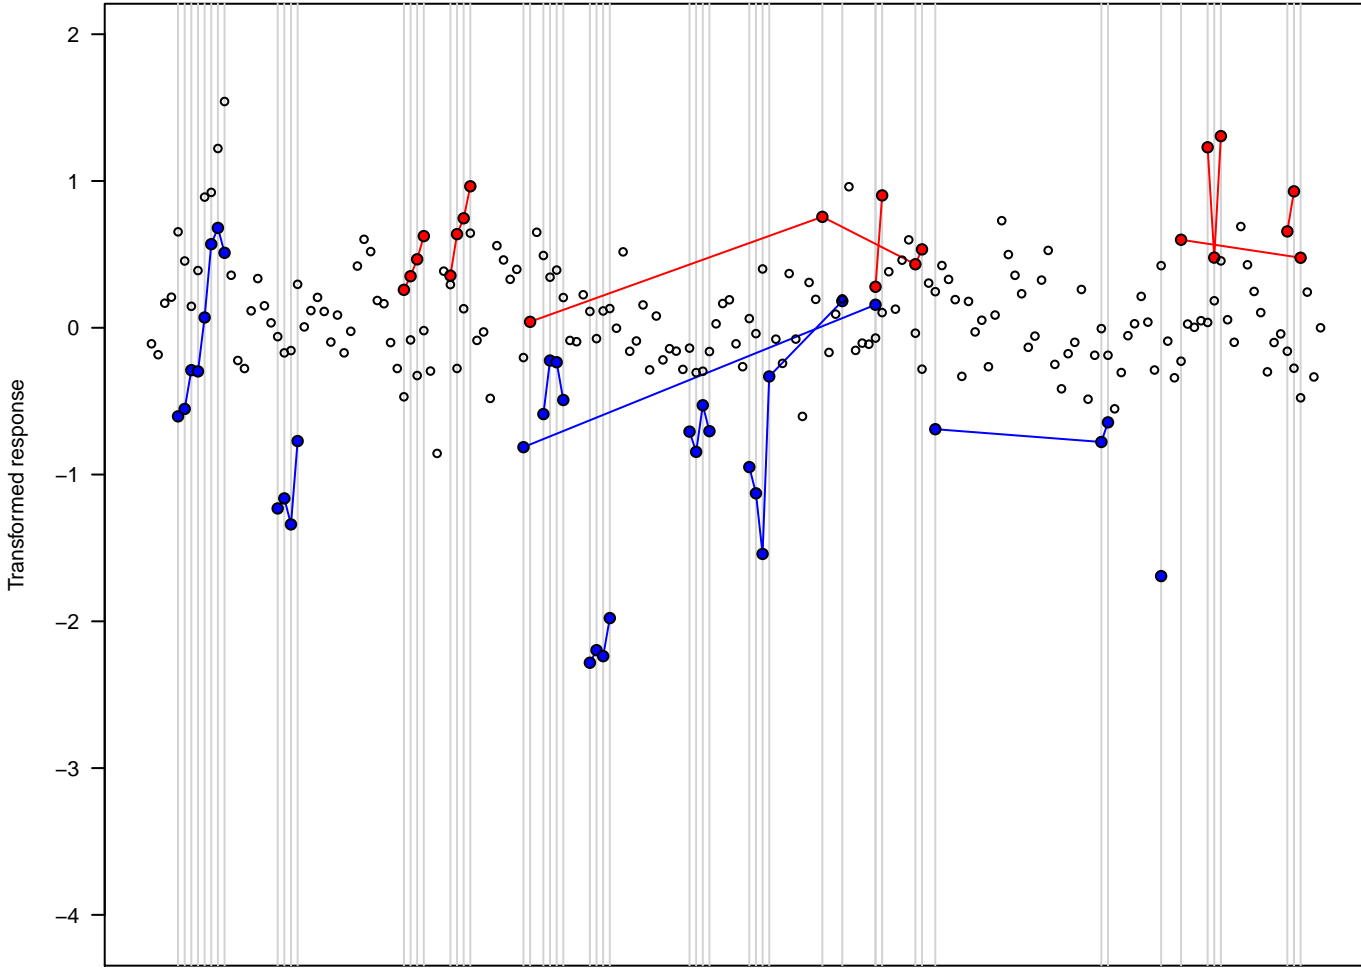

MRC Harwell

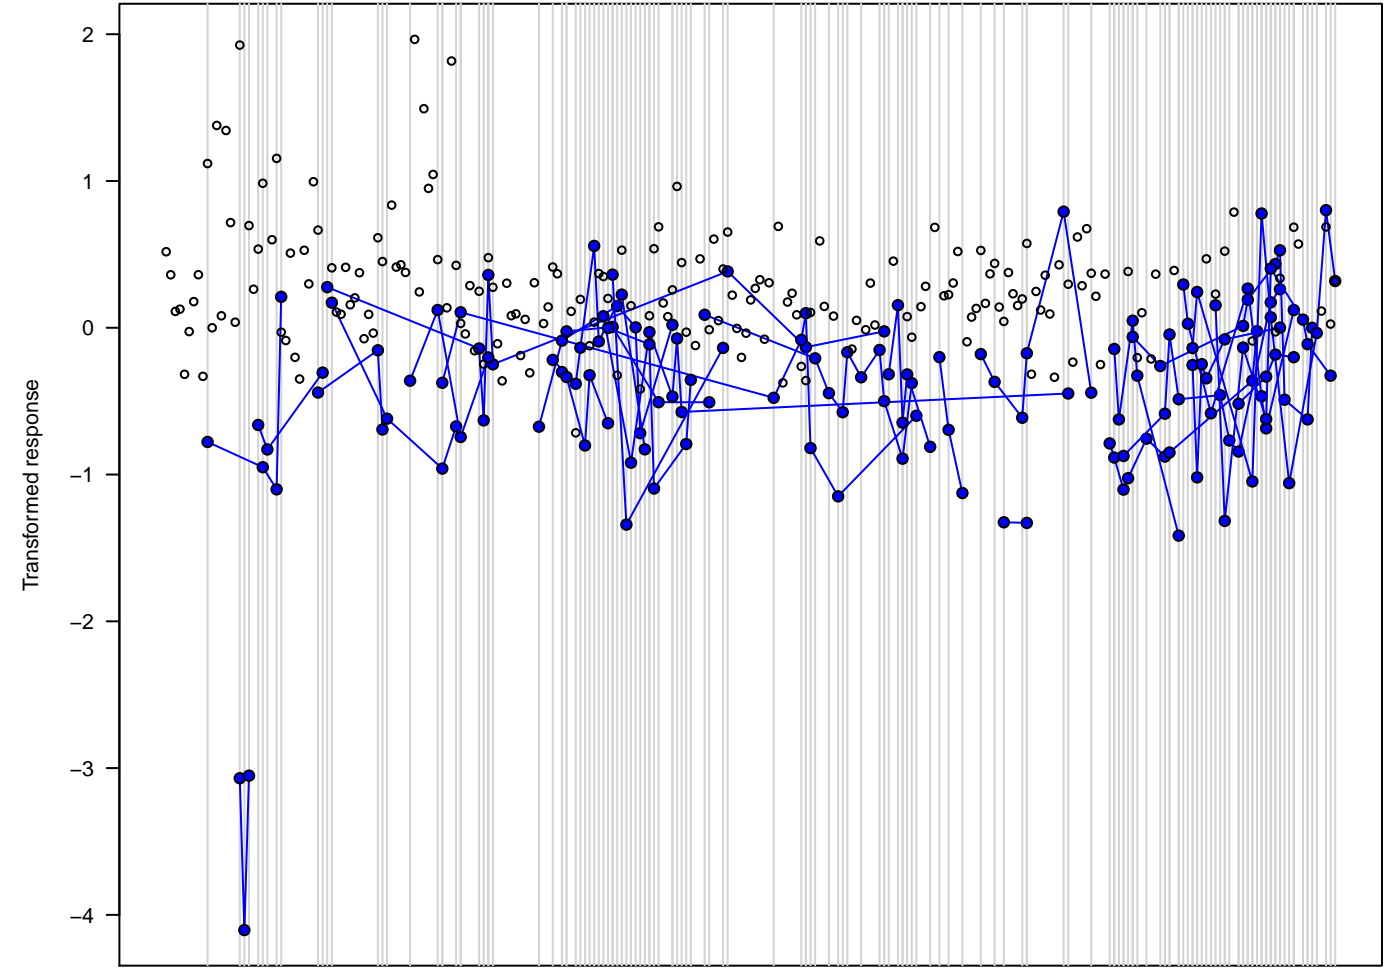

WTSI

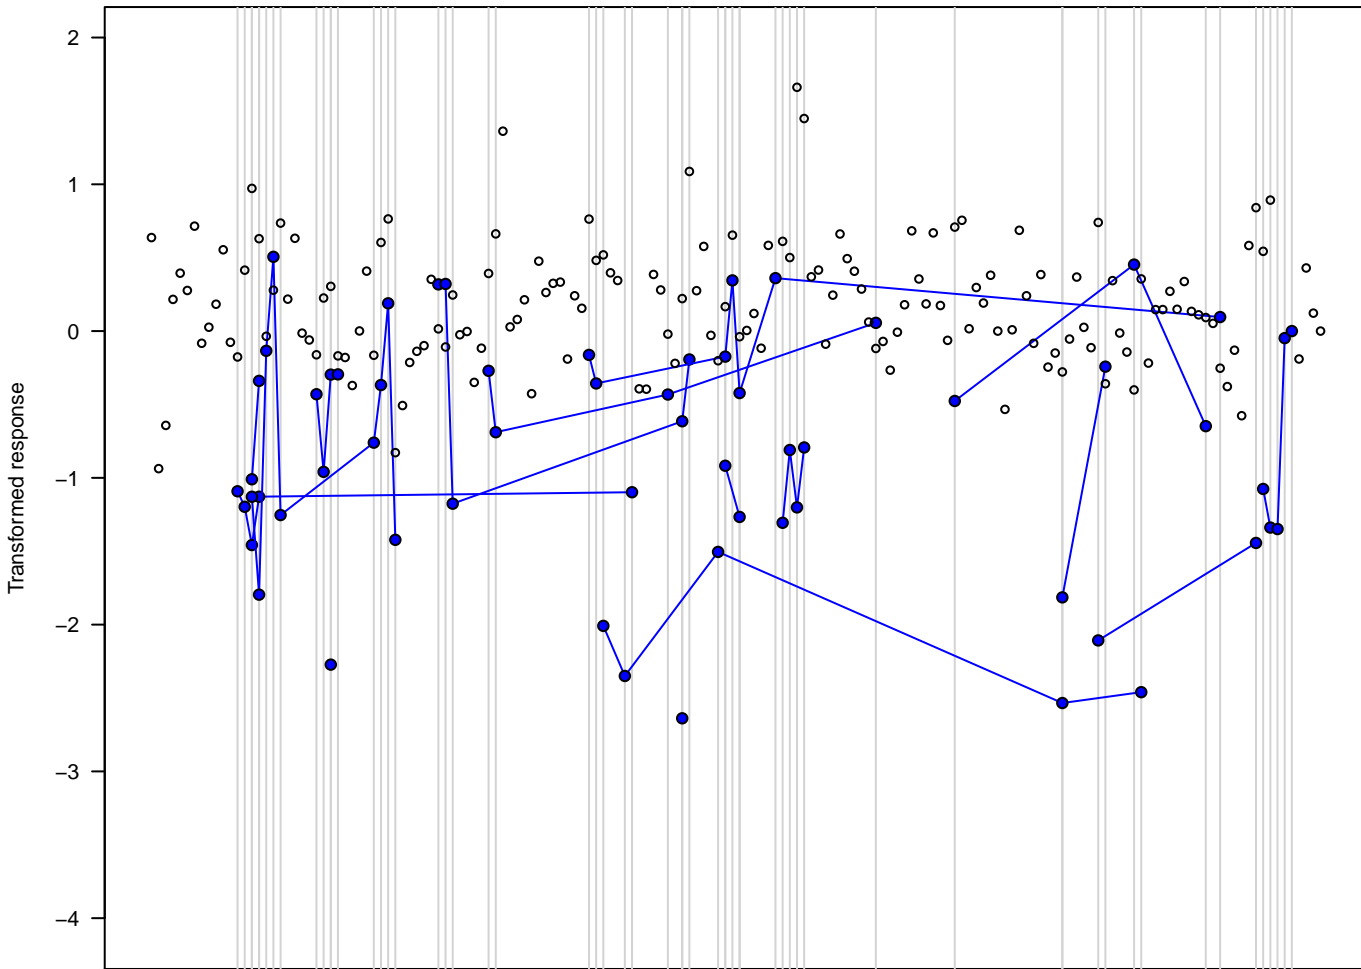

ICS

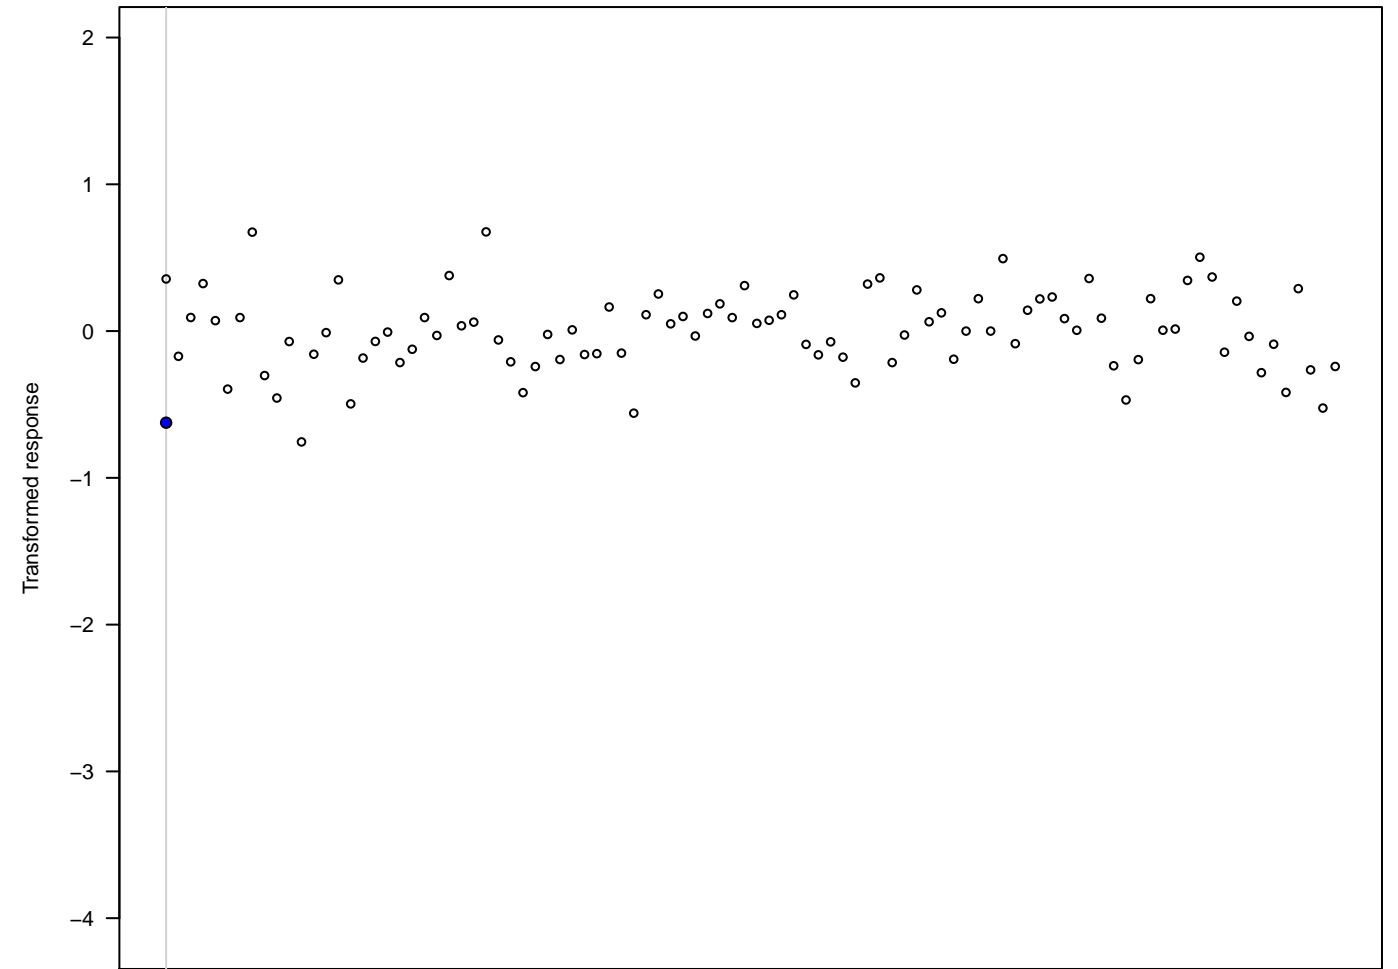

Total food intake  
(Calorimetry)

HMGU

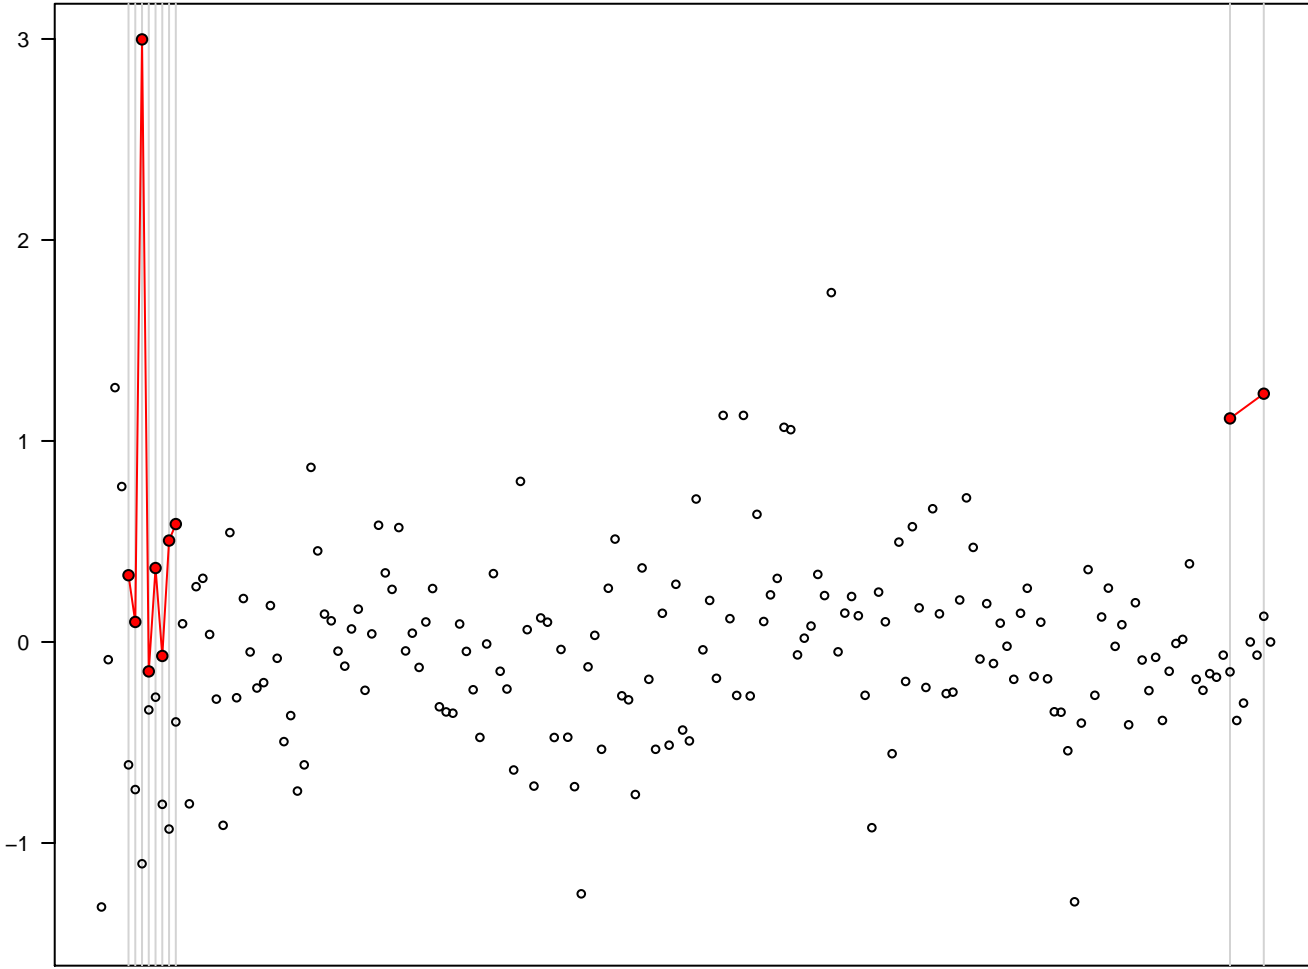

MRC Harwell

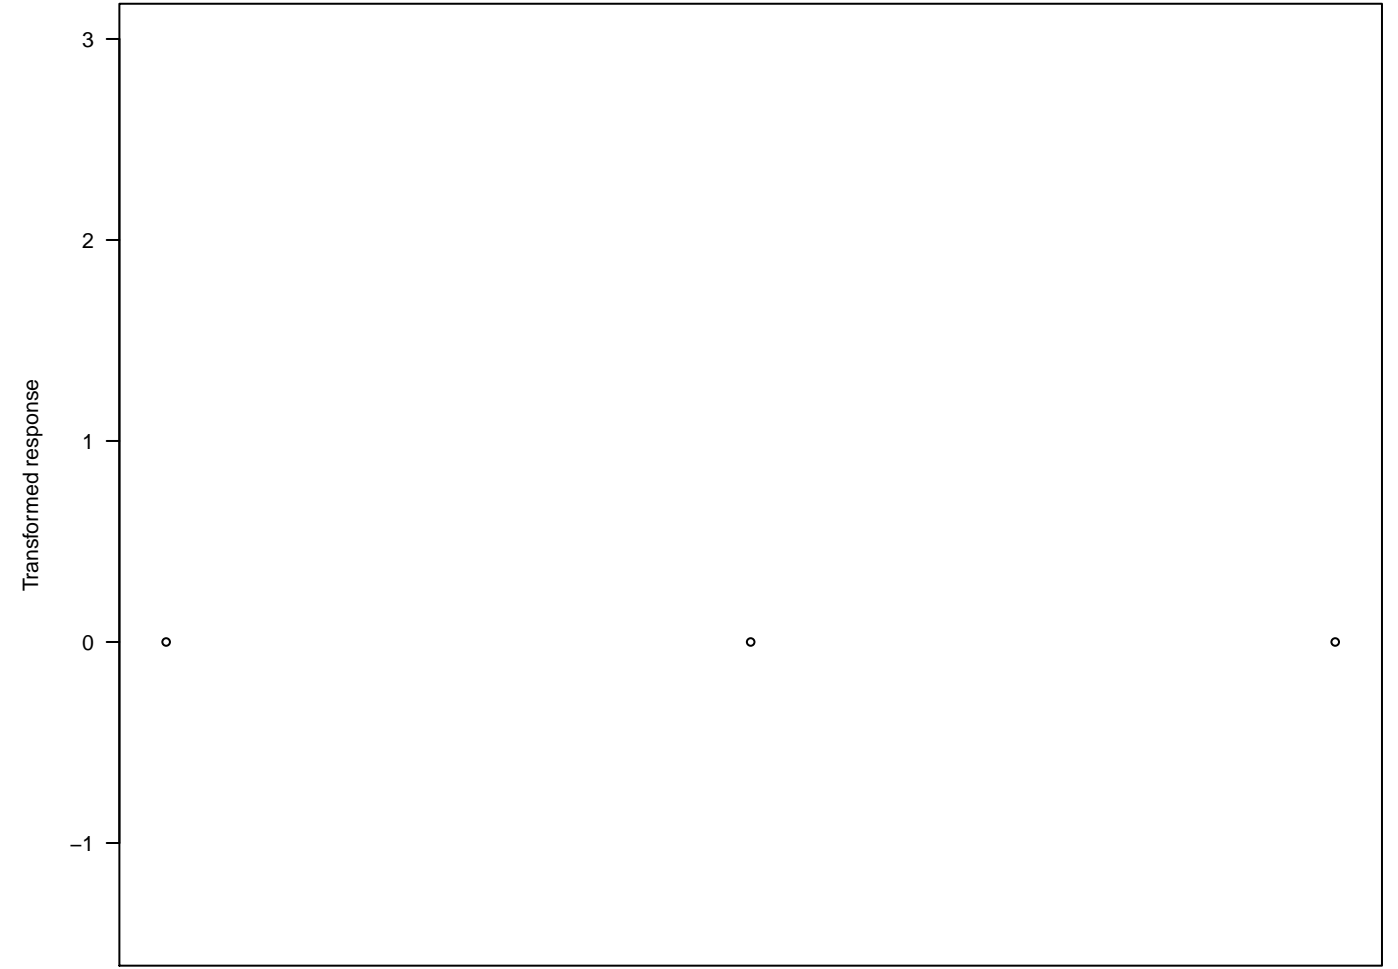

WTSI

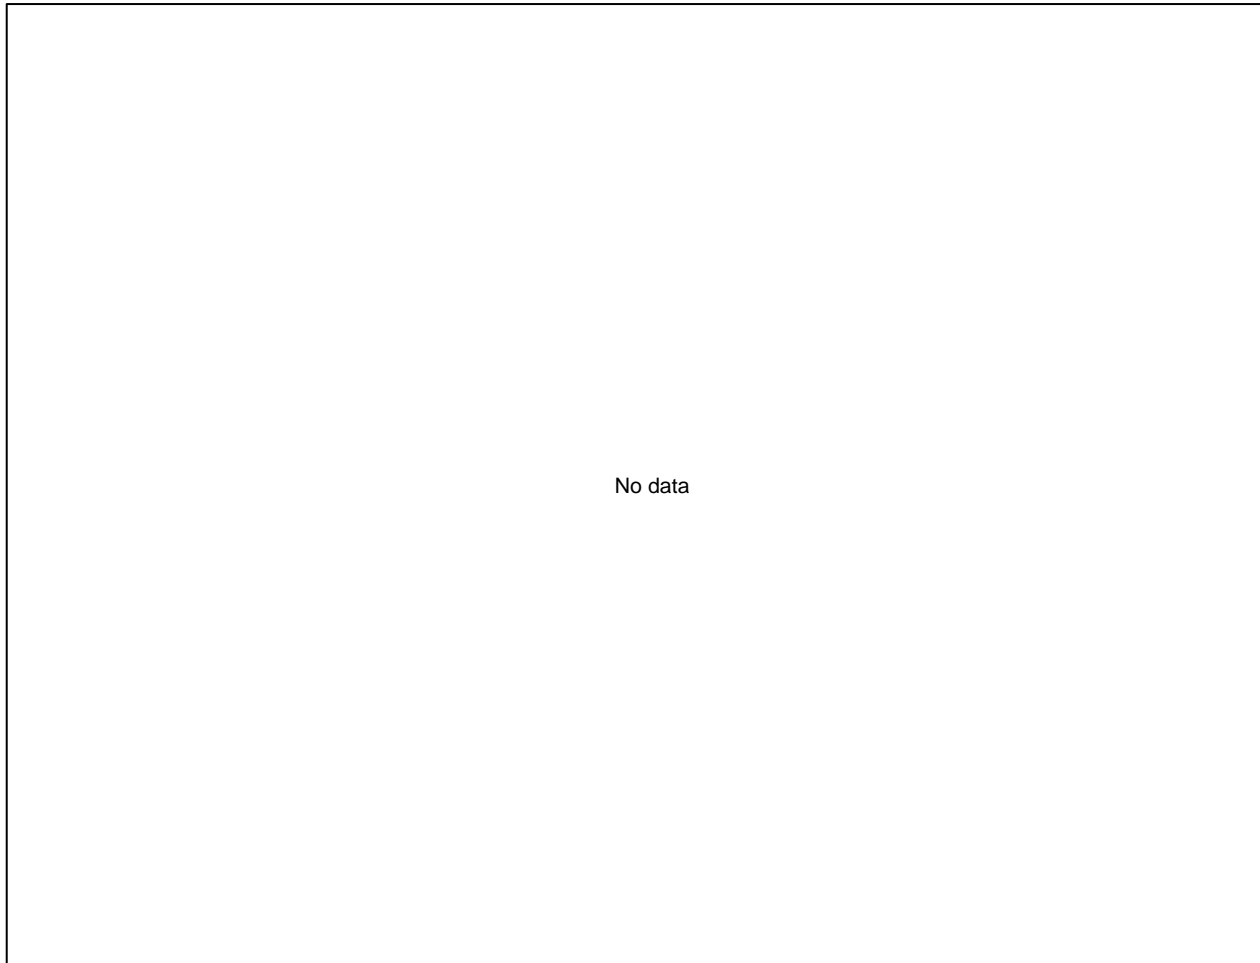

ICS

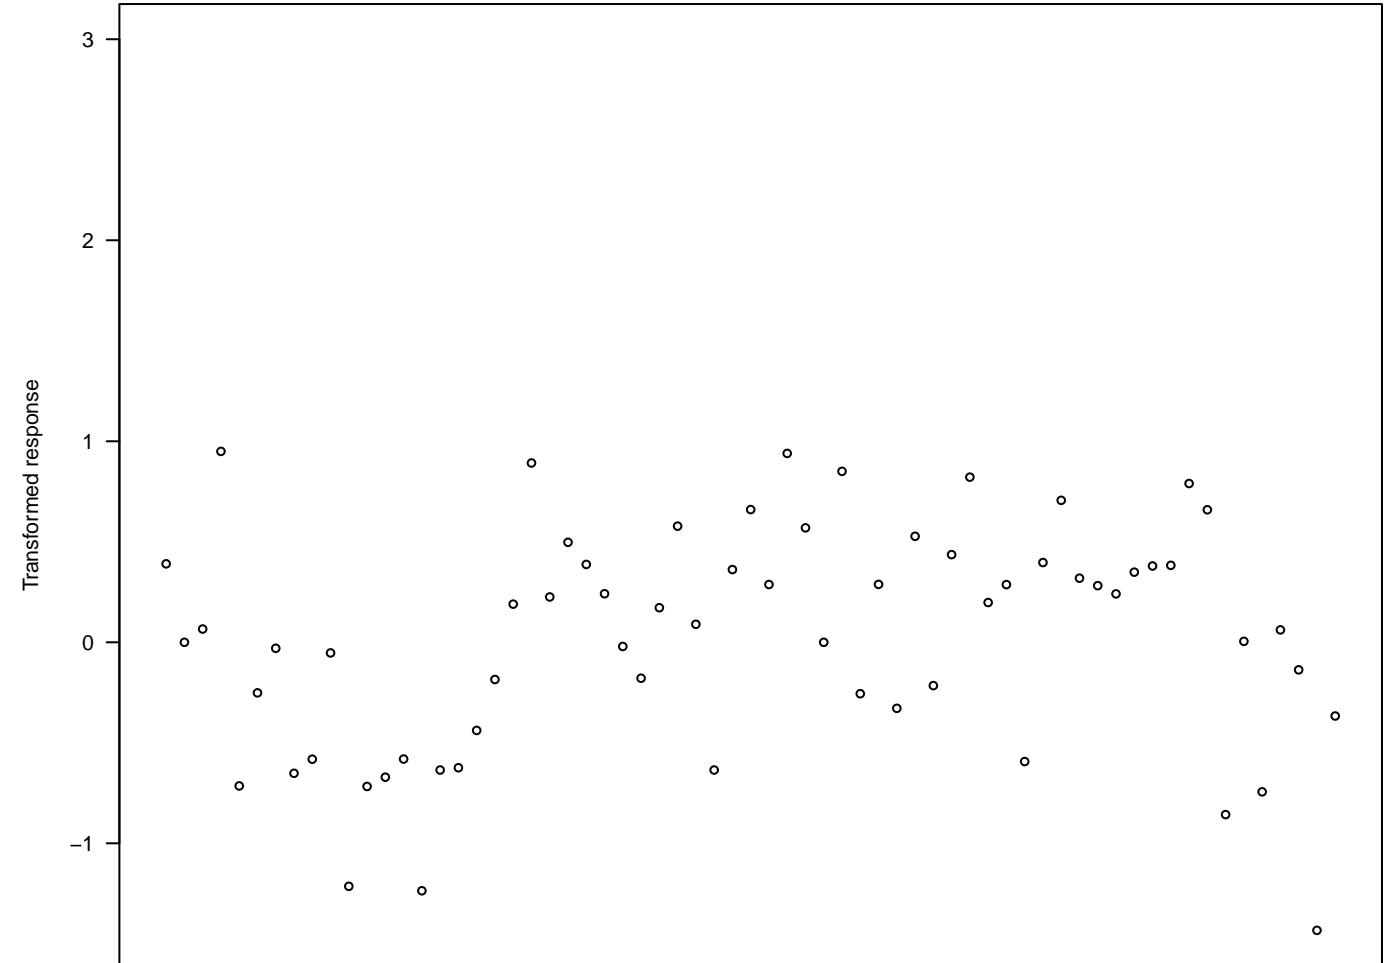

# Respiratory Exchange Ratio (Calorimetry)

## HMGU

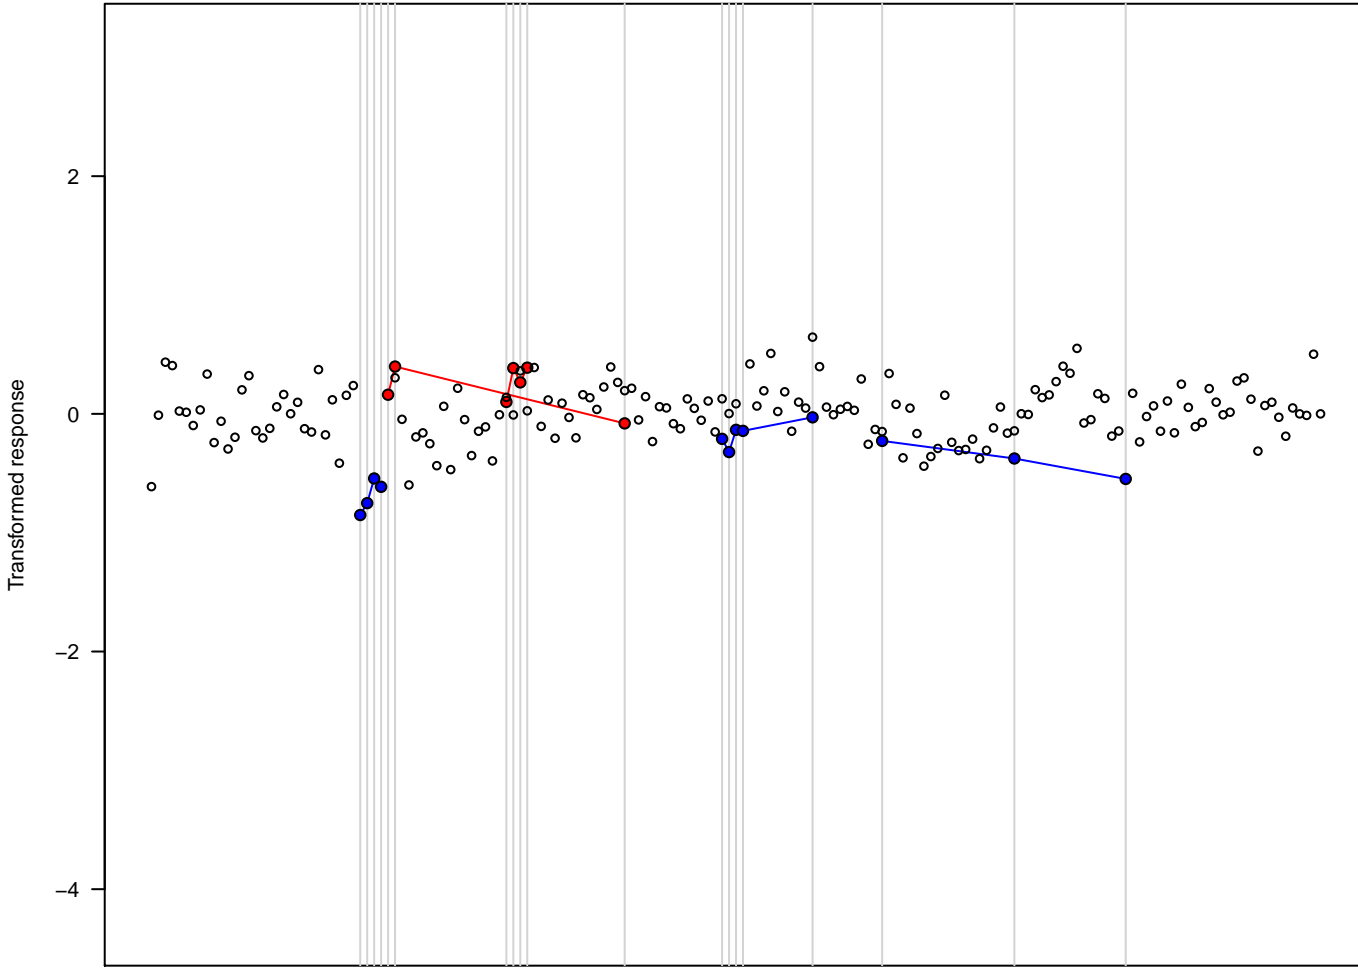

## MRC Harwell

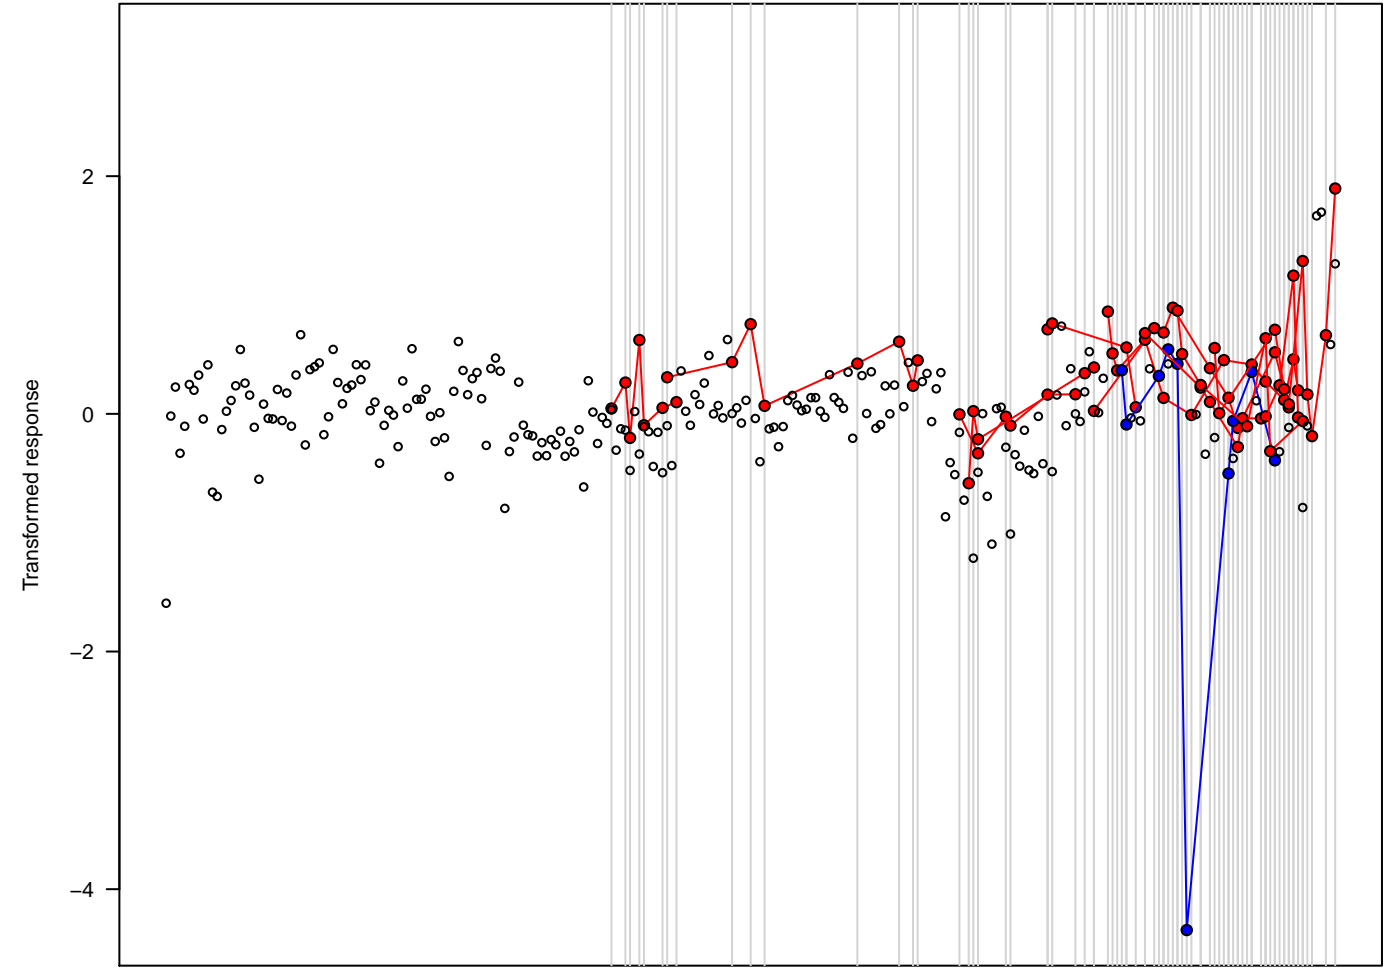

## WTSI

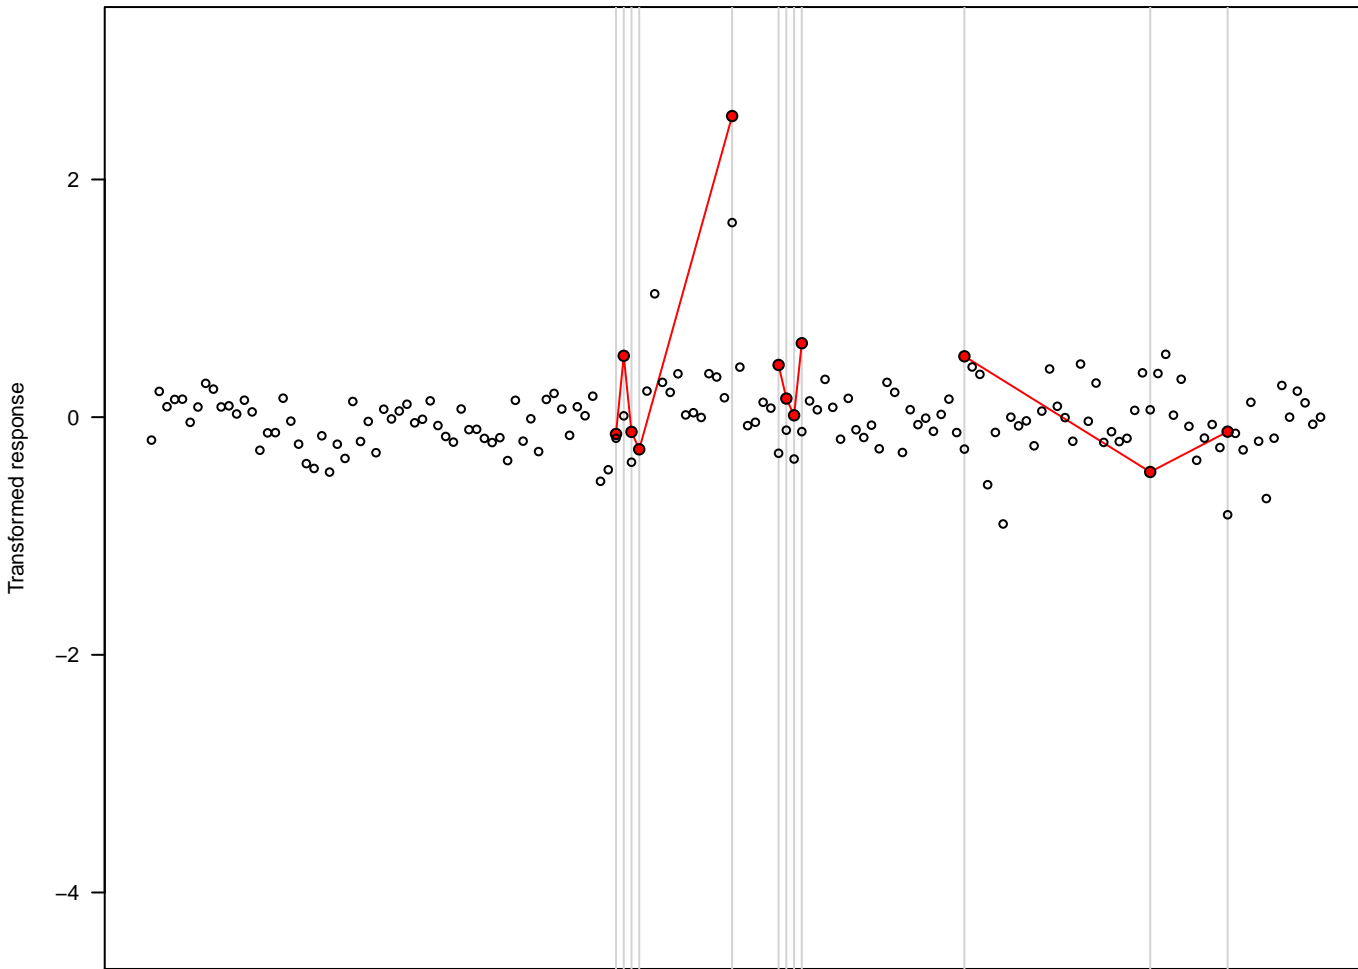

## ICS

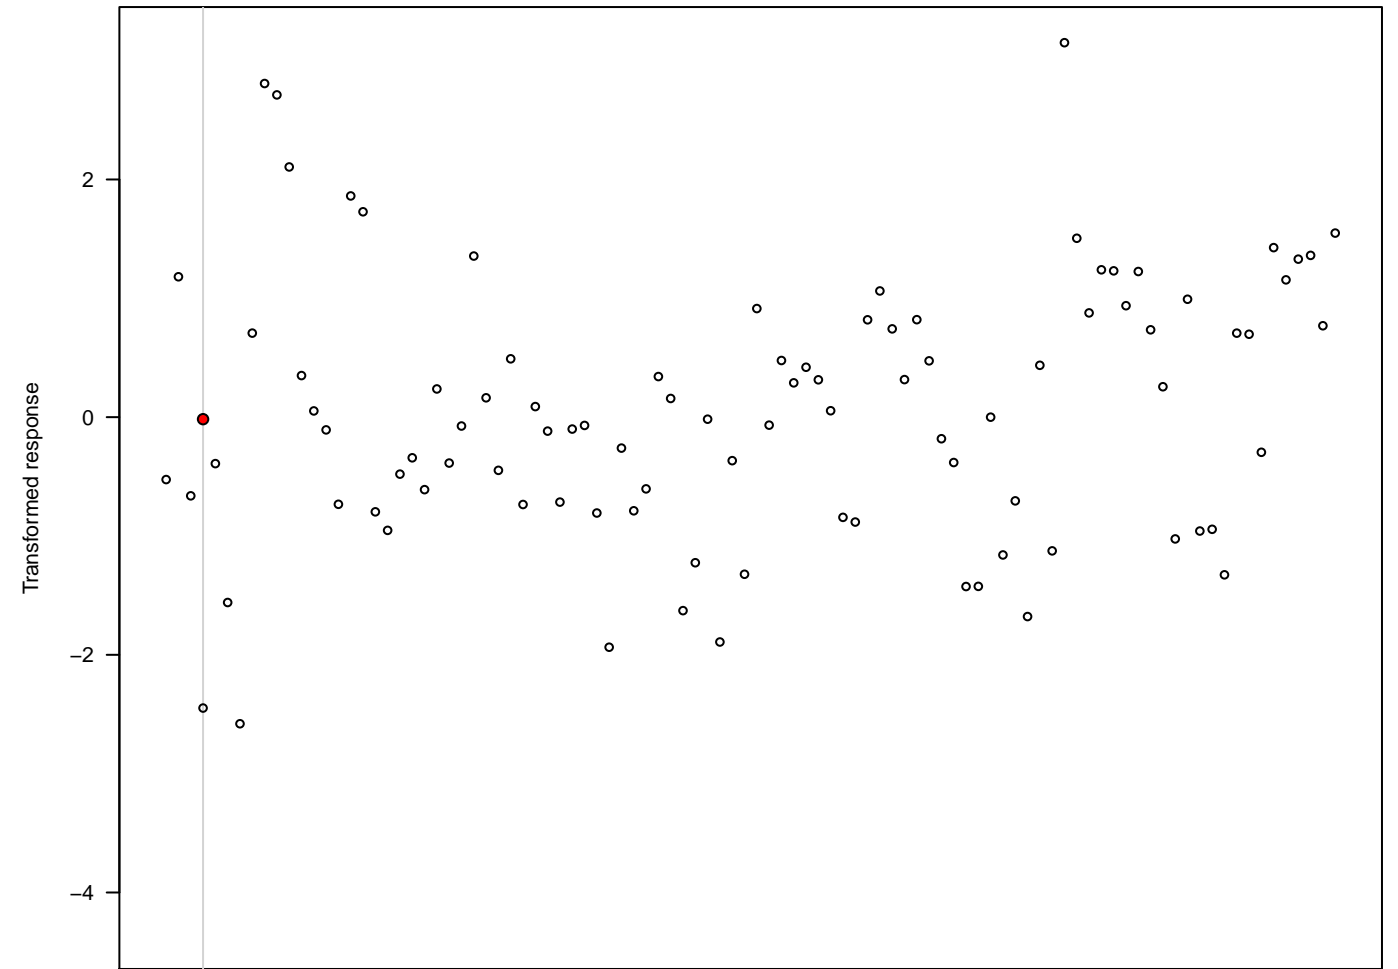

# Dark Oxygen consumption (Calorimetry)

## HMGU

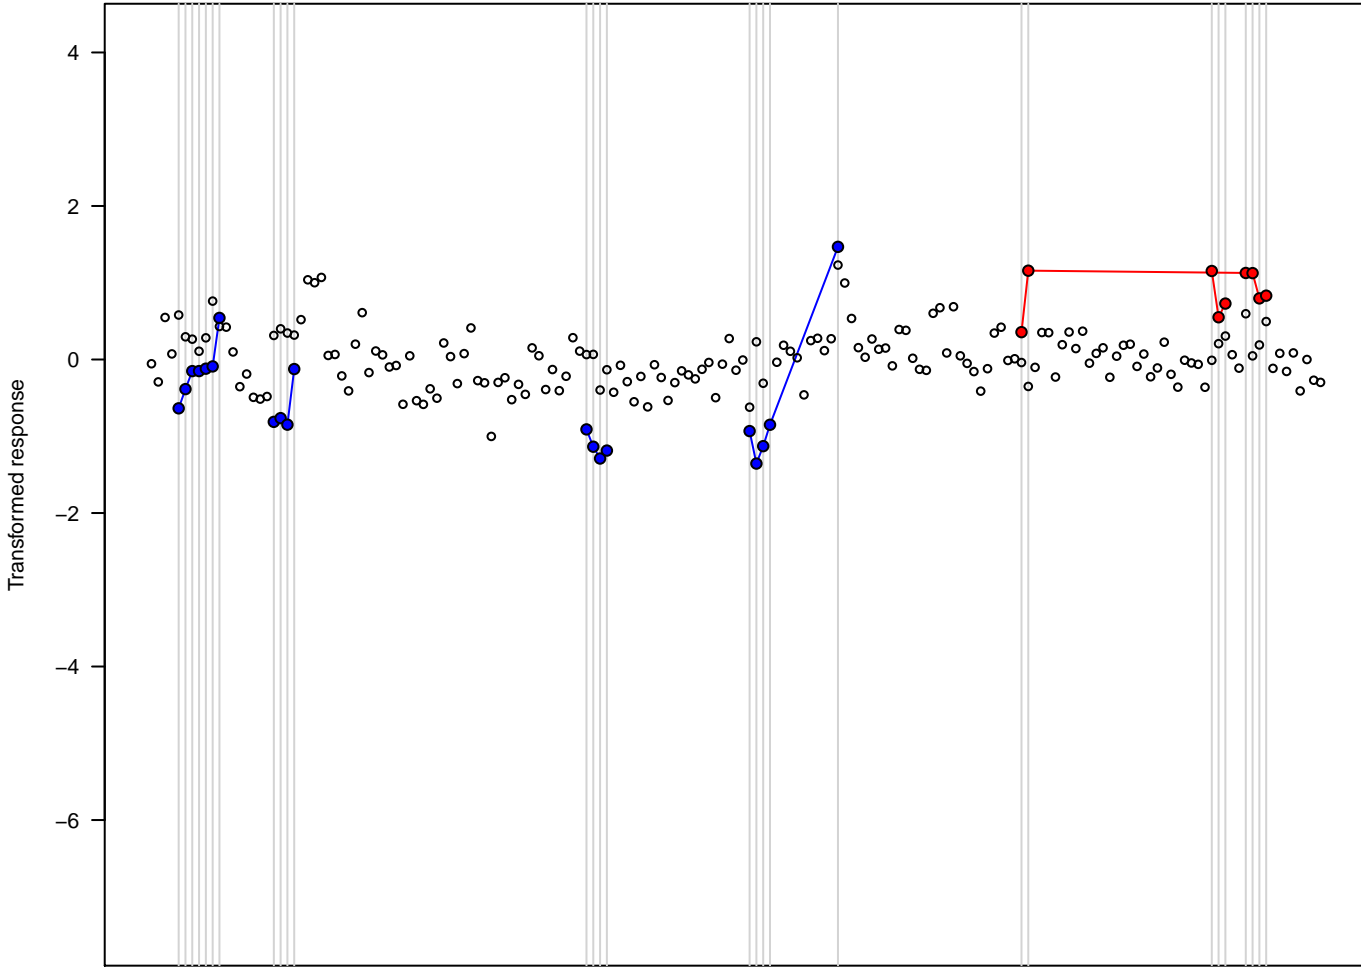

## MRC Harwell

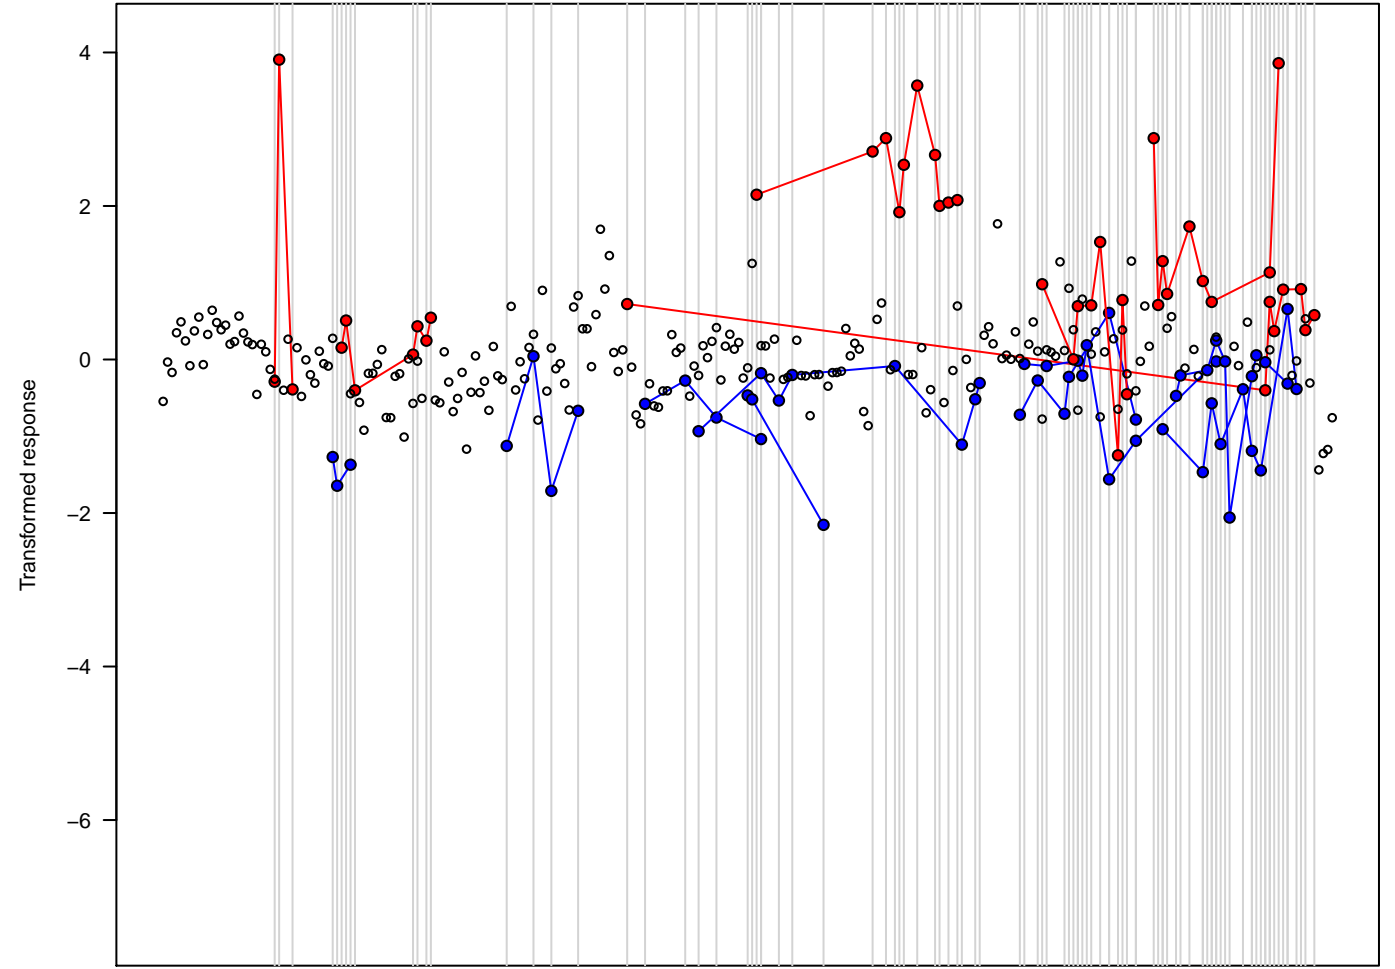

## WTSI

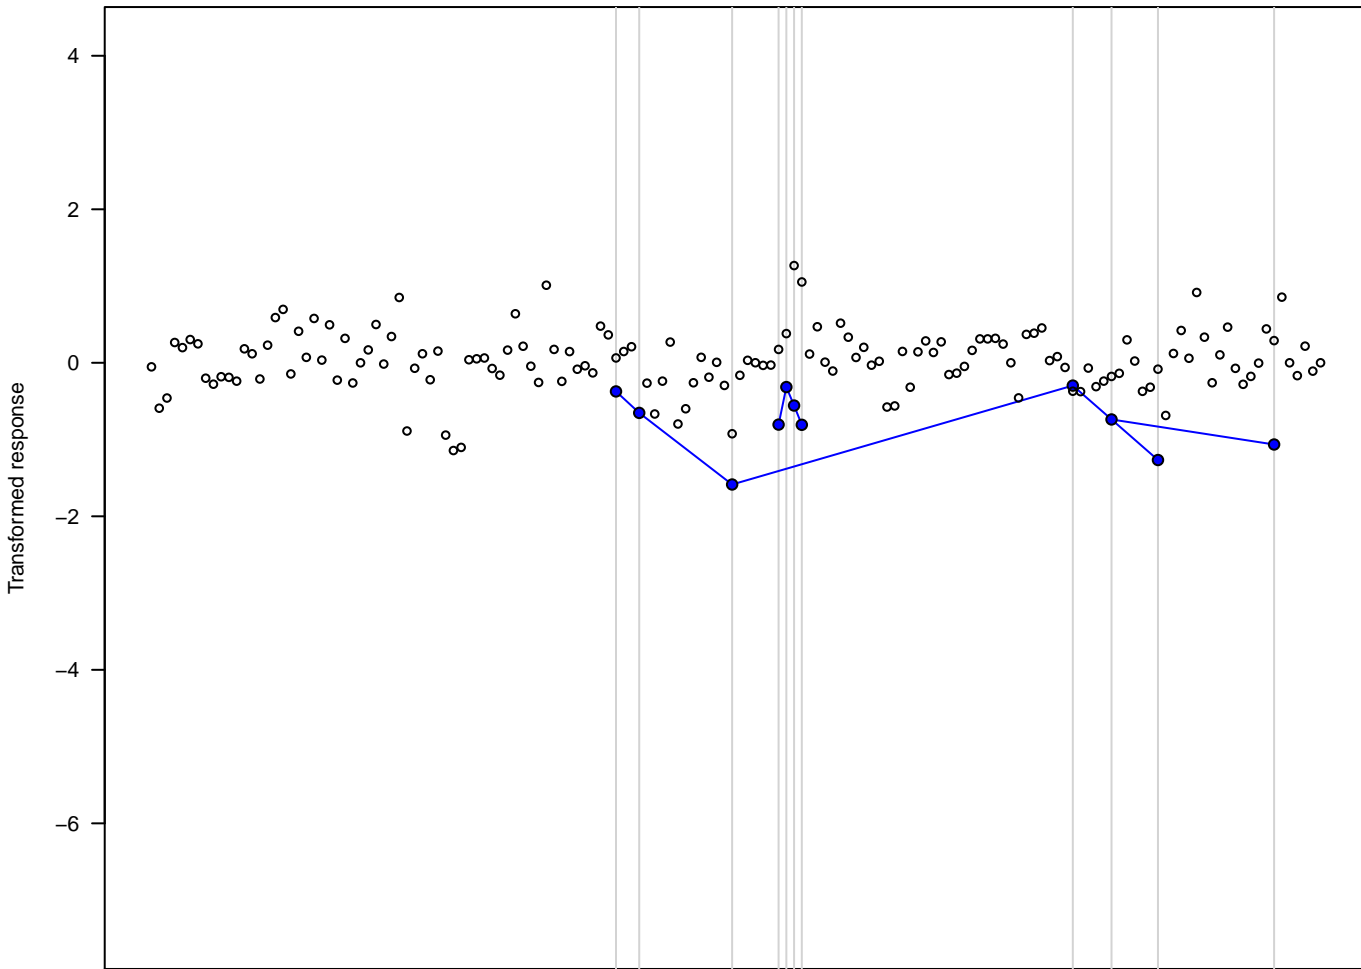

## ICS

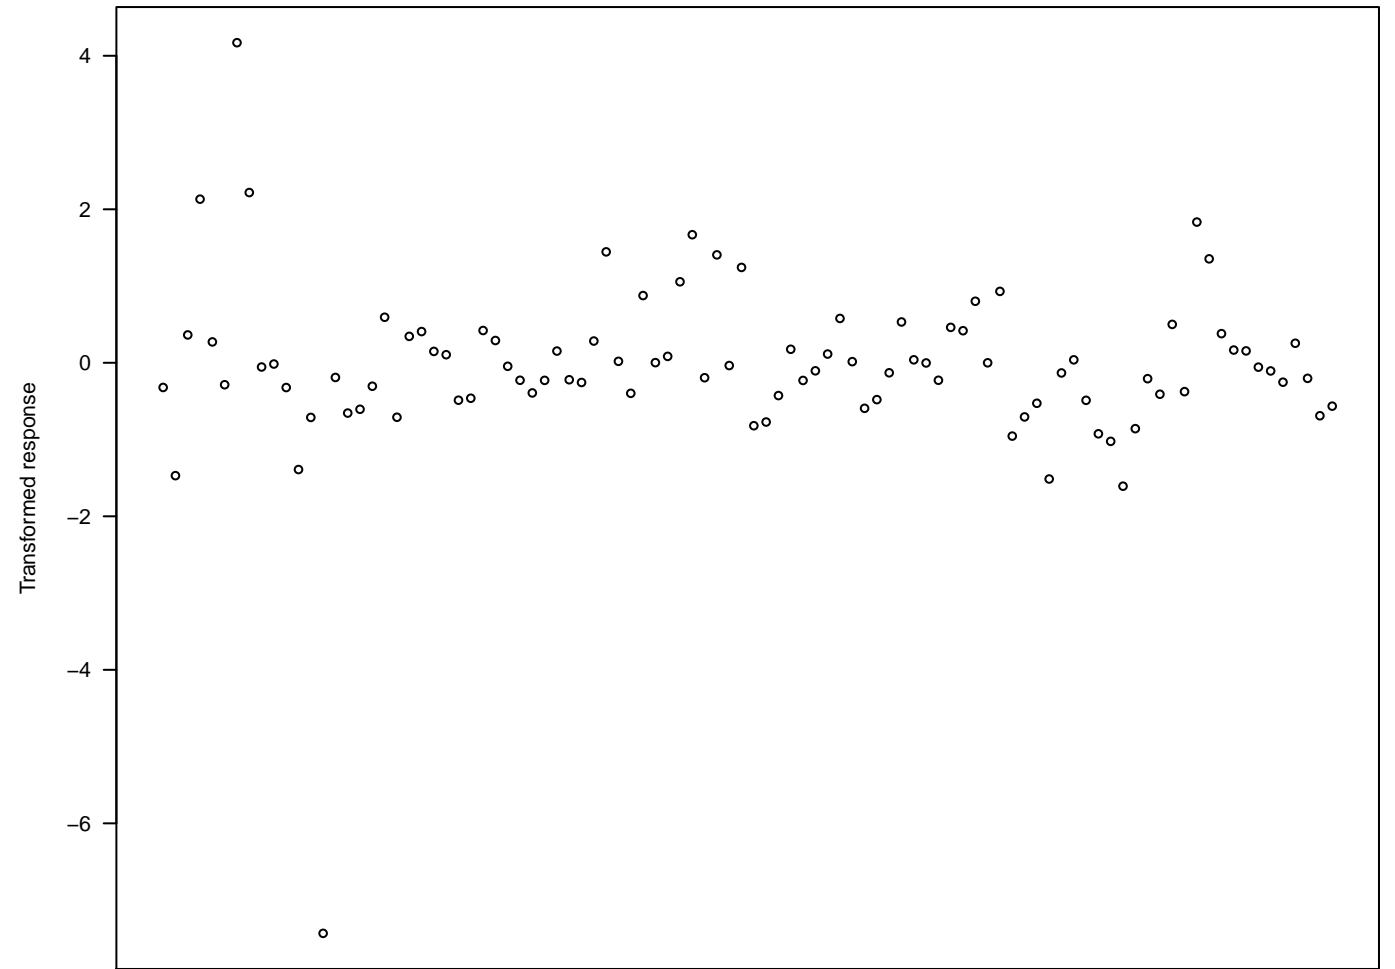

Dark Carbon dioxide production  
(Calorimetry)

HMGU

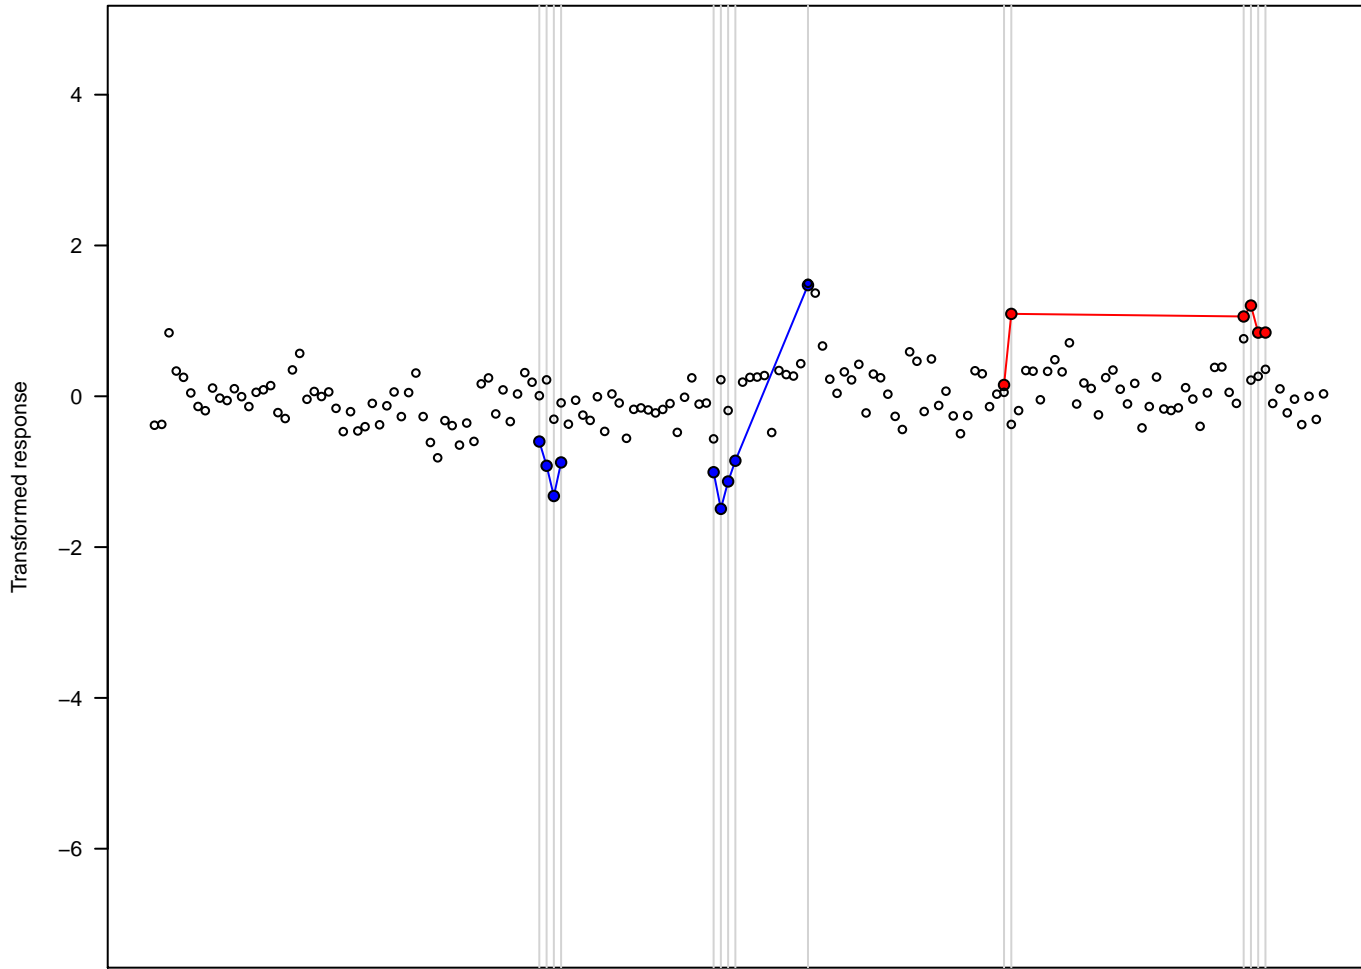

MRC Harwell

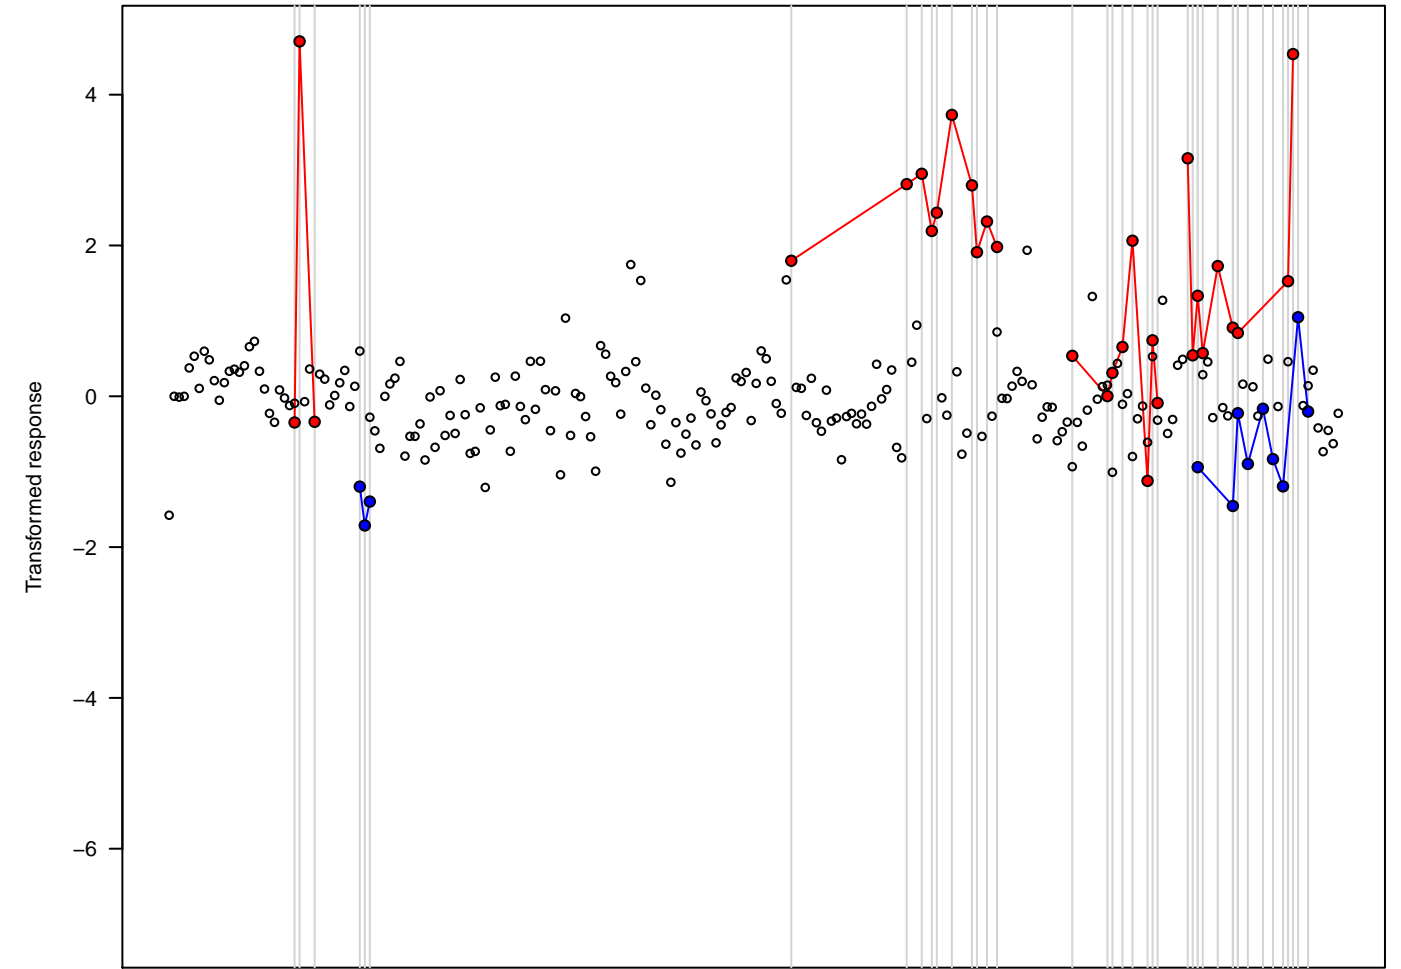

WTSI

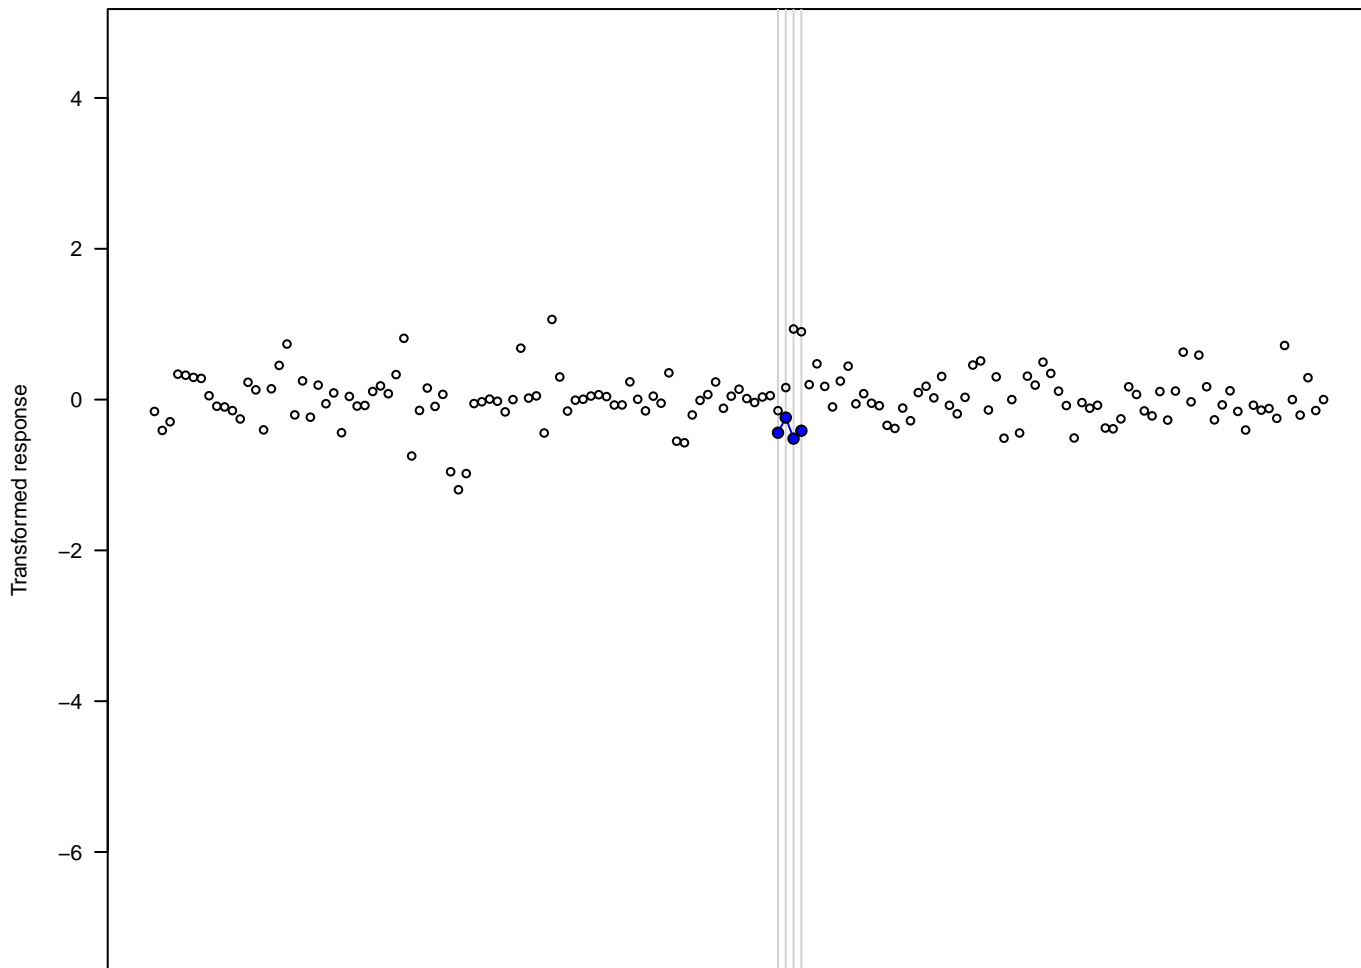

ICS

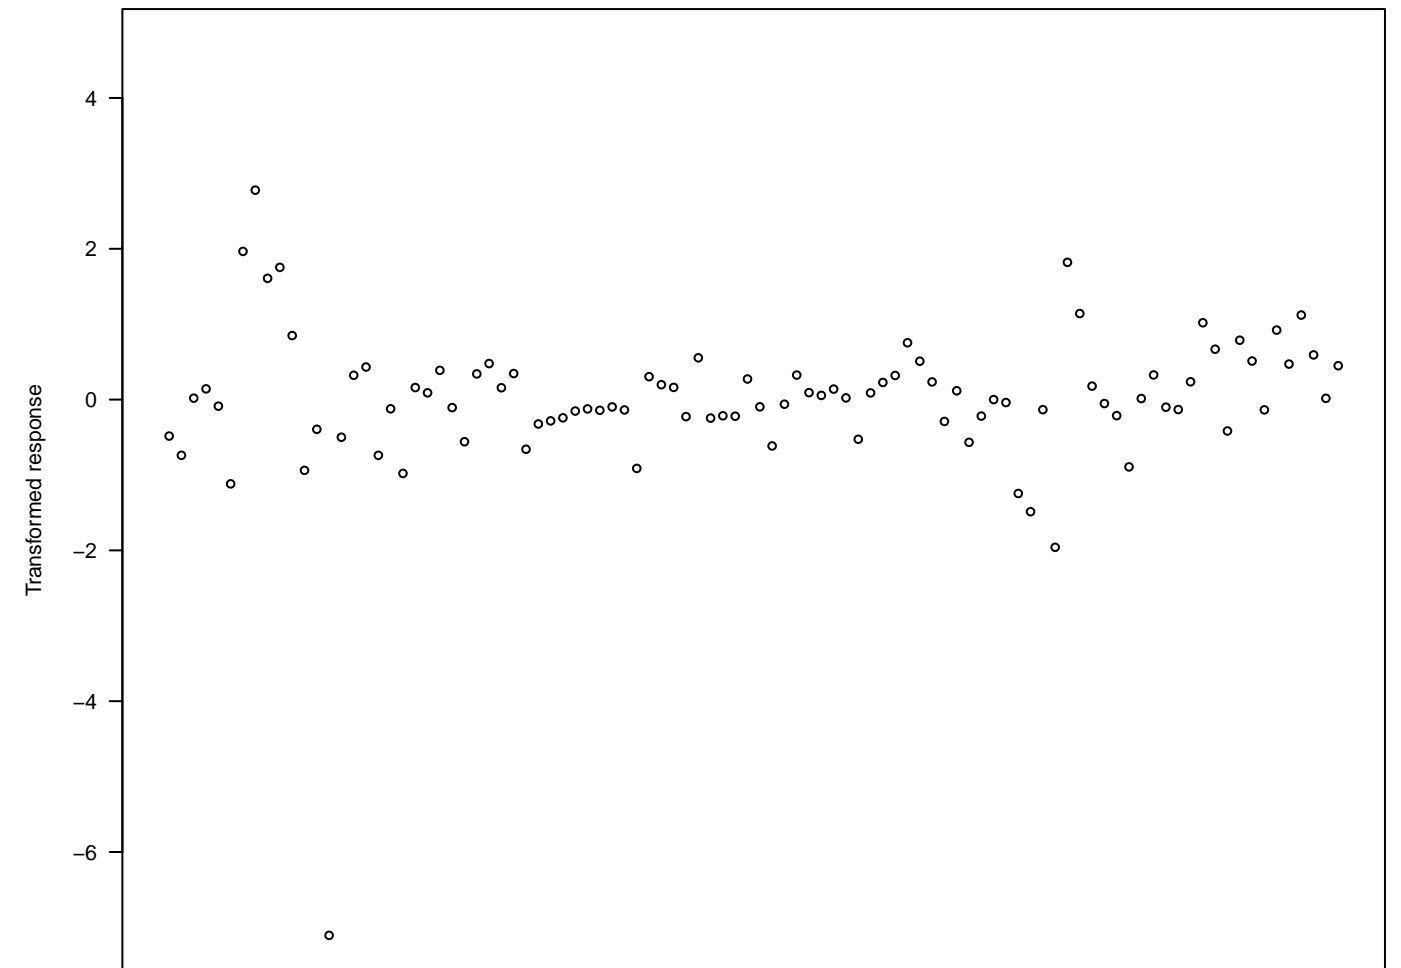

Dark Heat production  
(Calorimetry)

HMGU

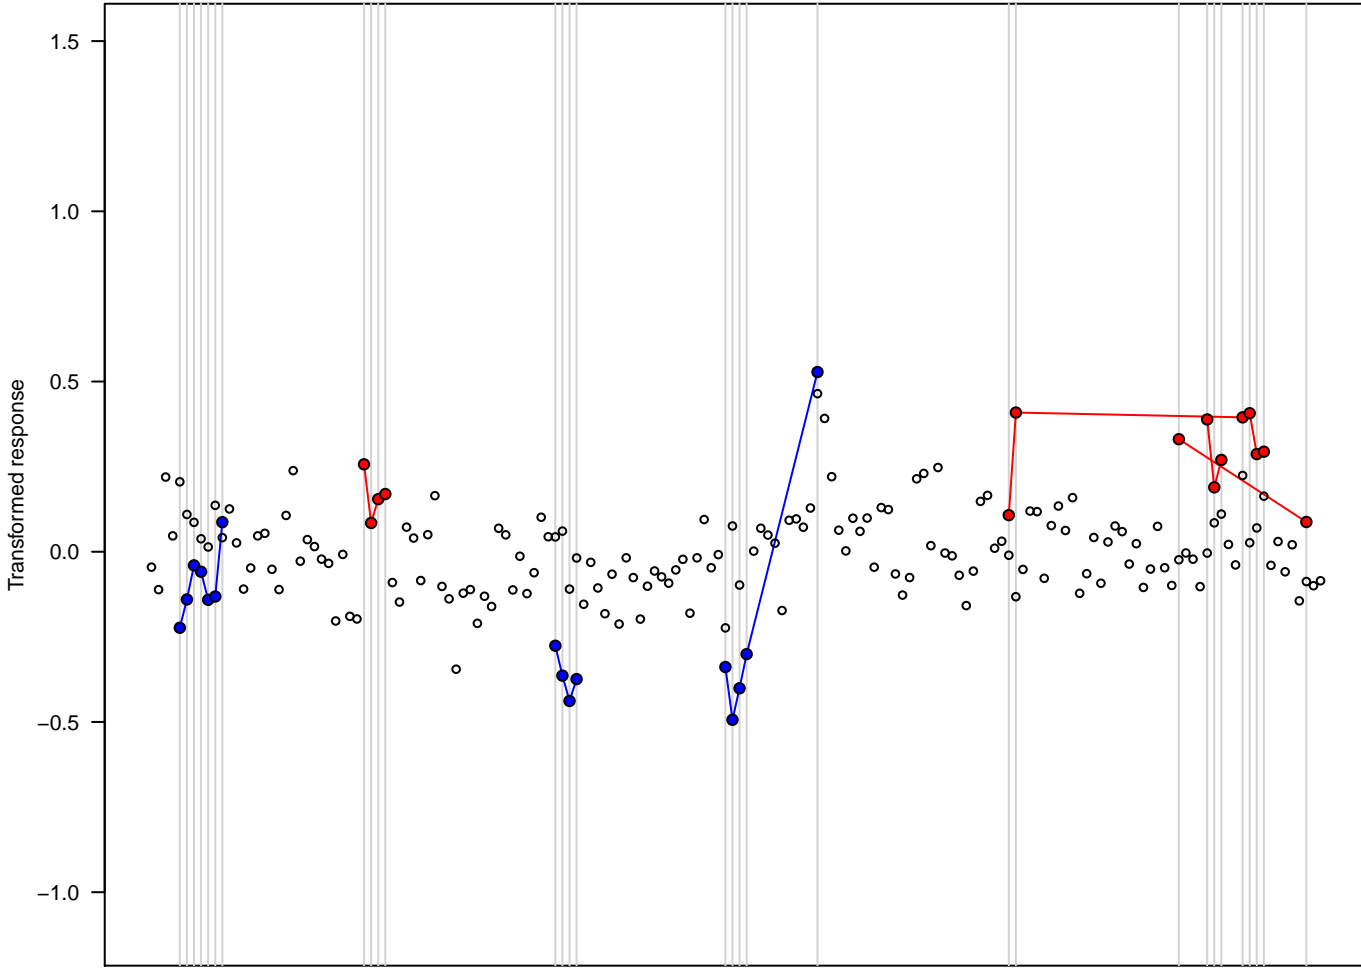

MRC Harwell

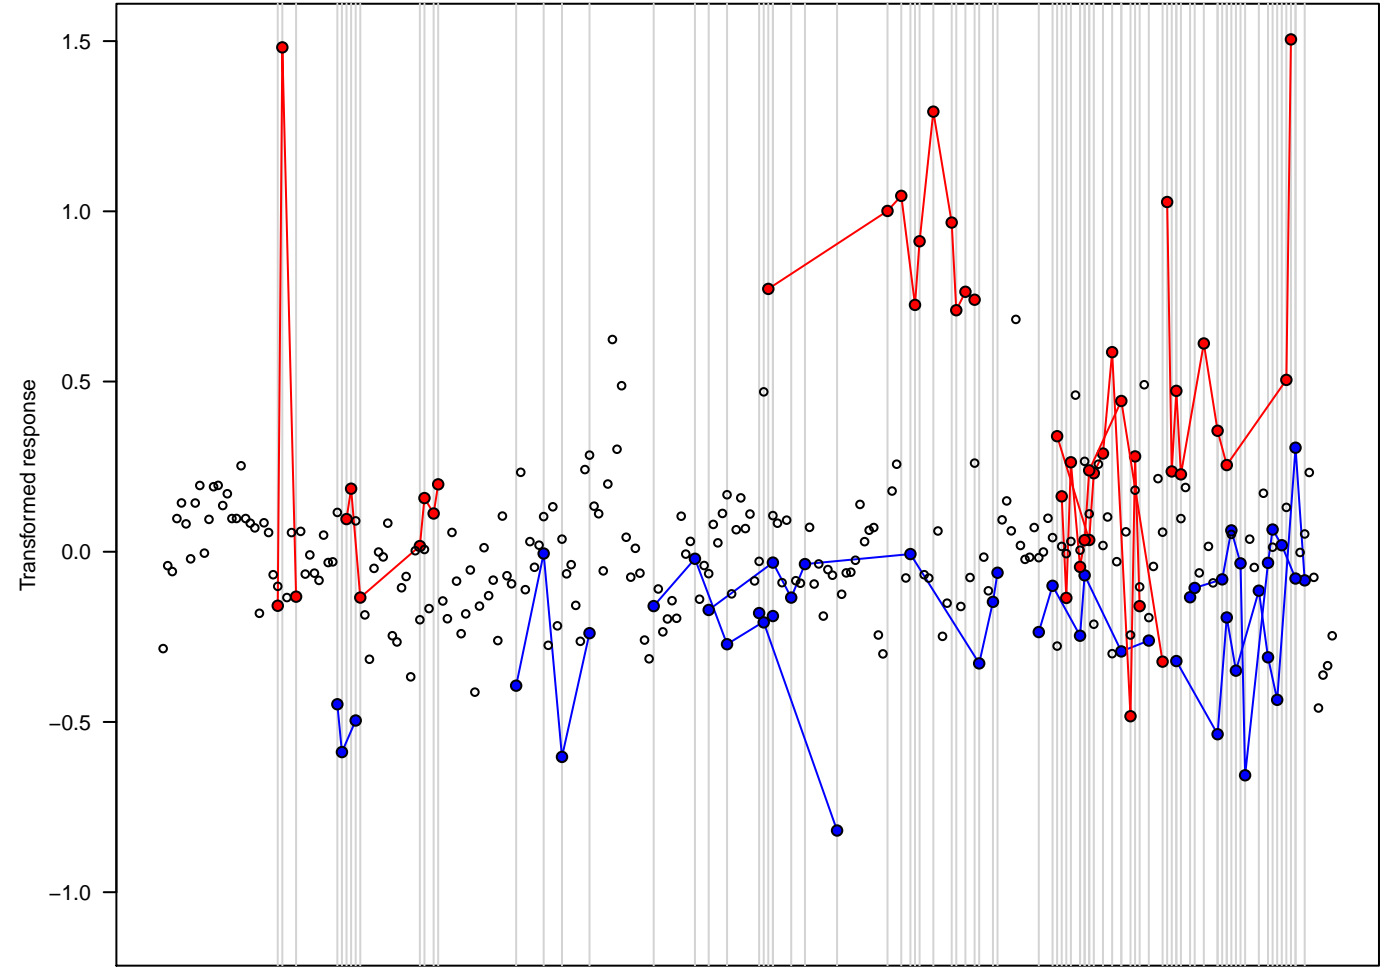

WTSI

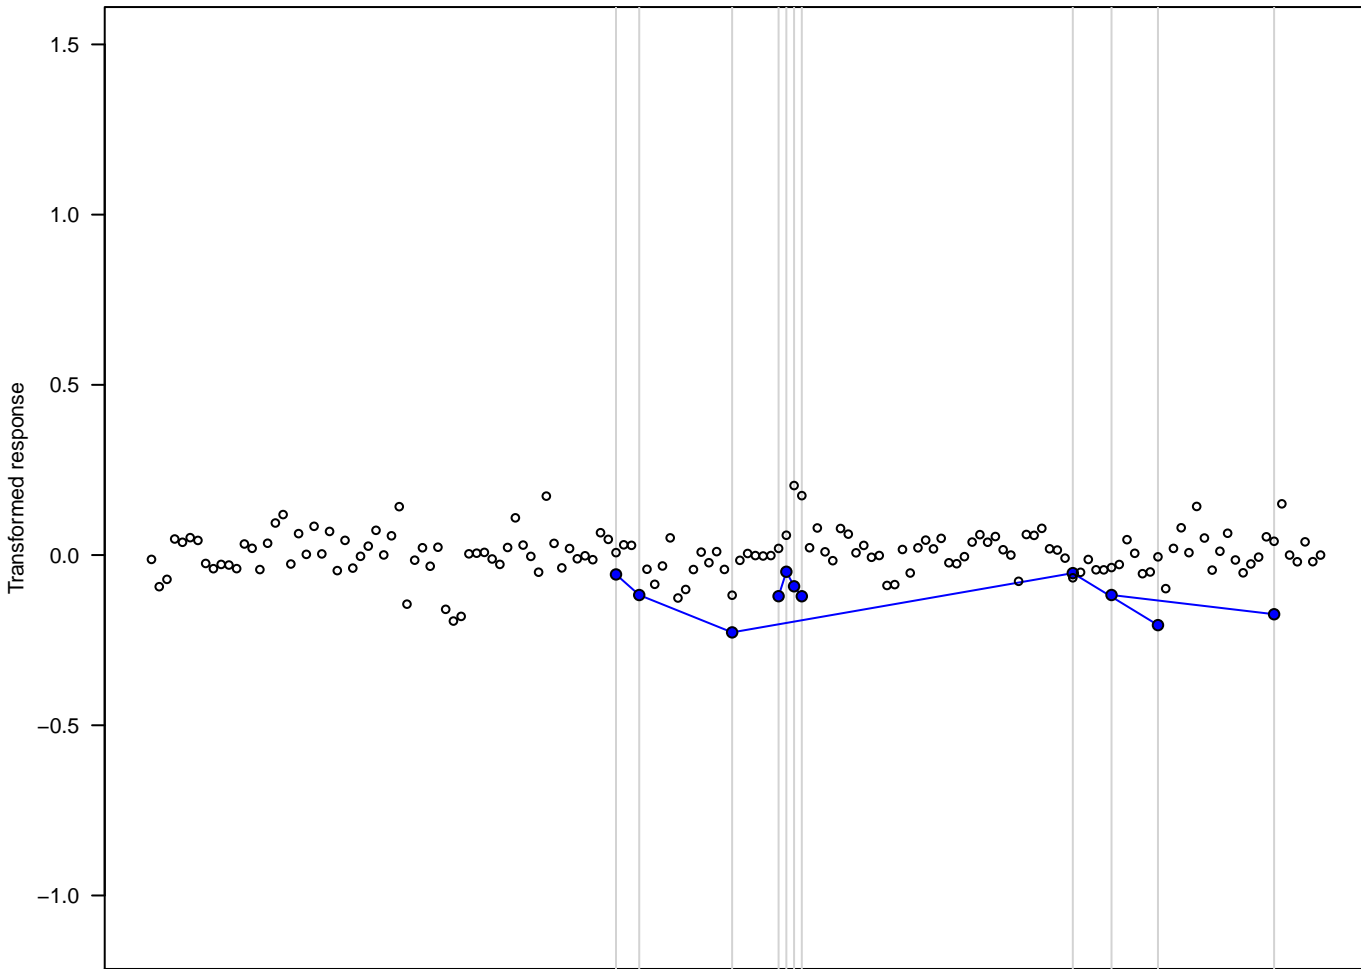

ICS

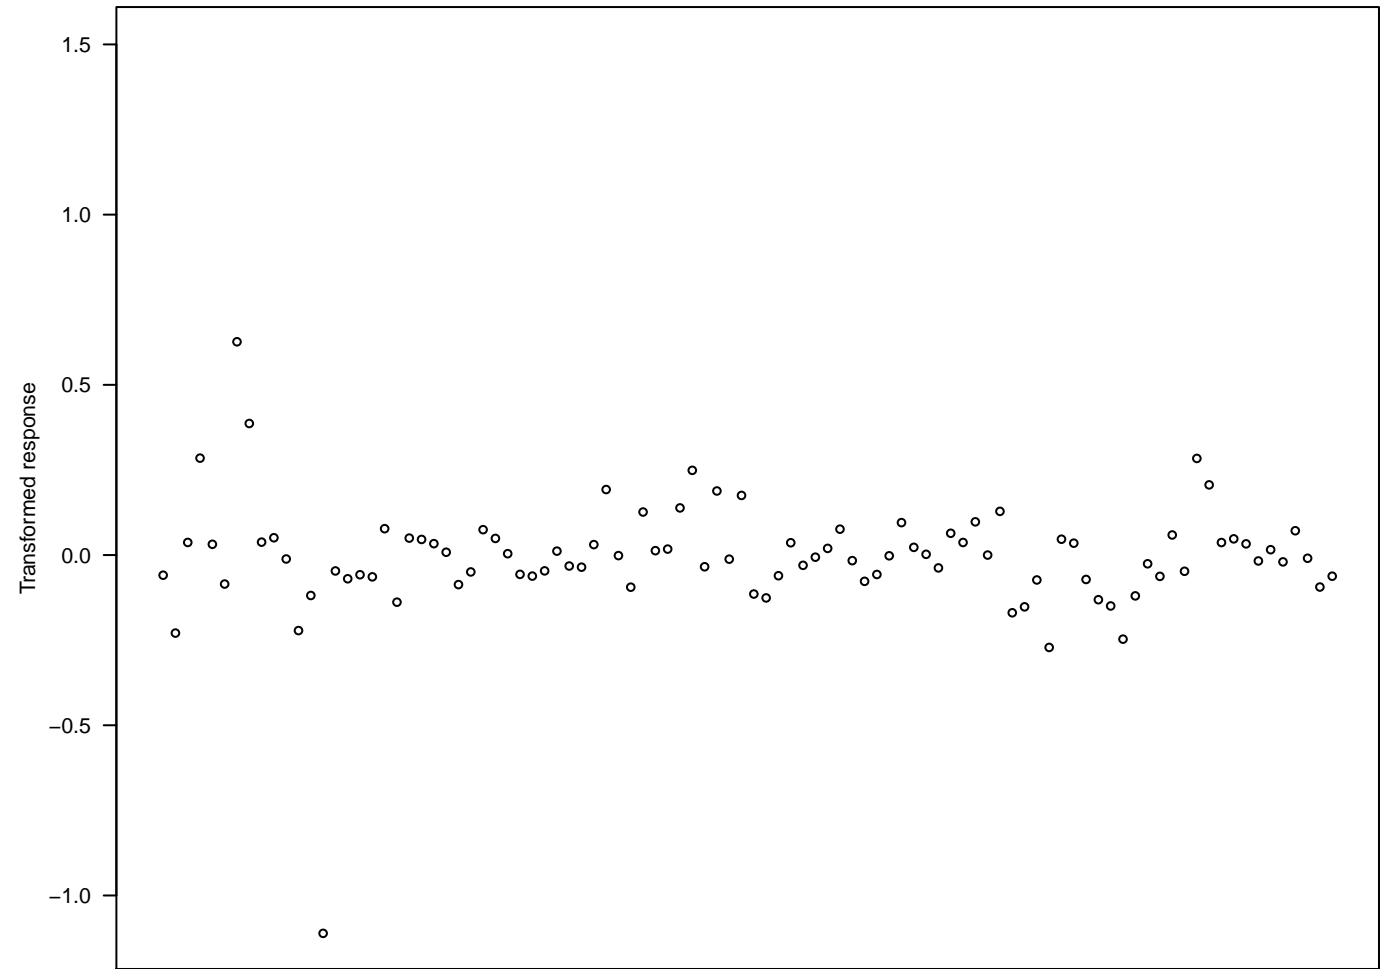



# Dark Ambulatory activity (Calorimetry)

## HMGU

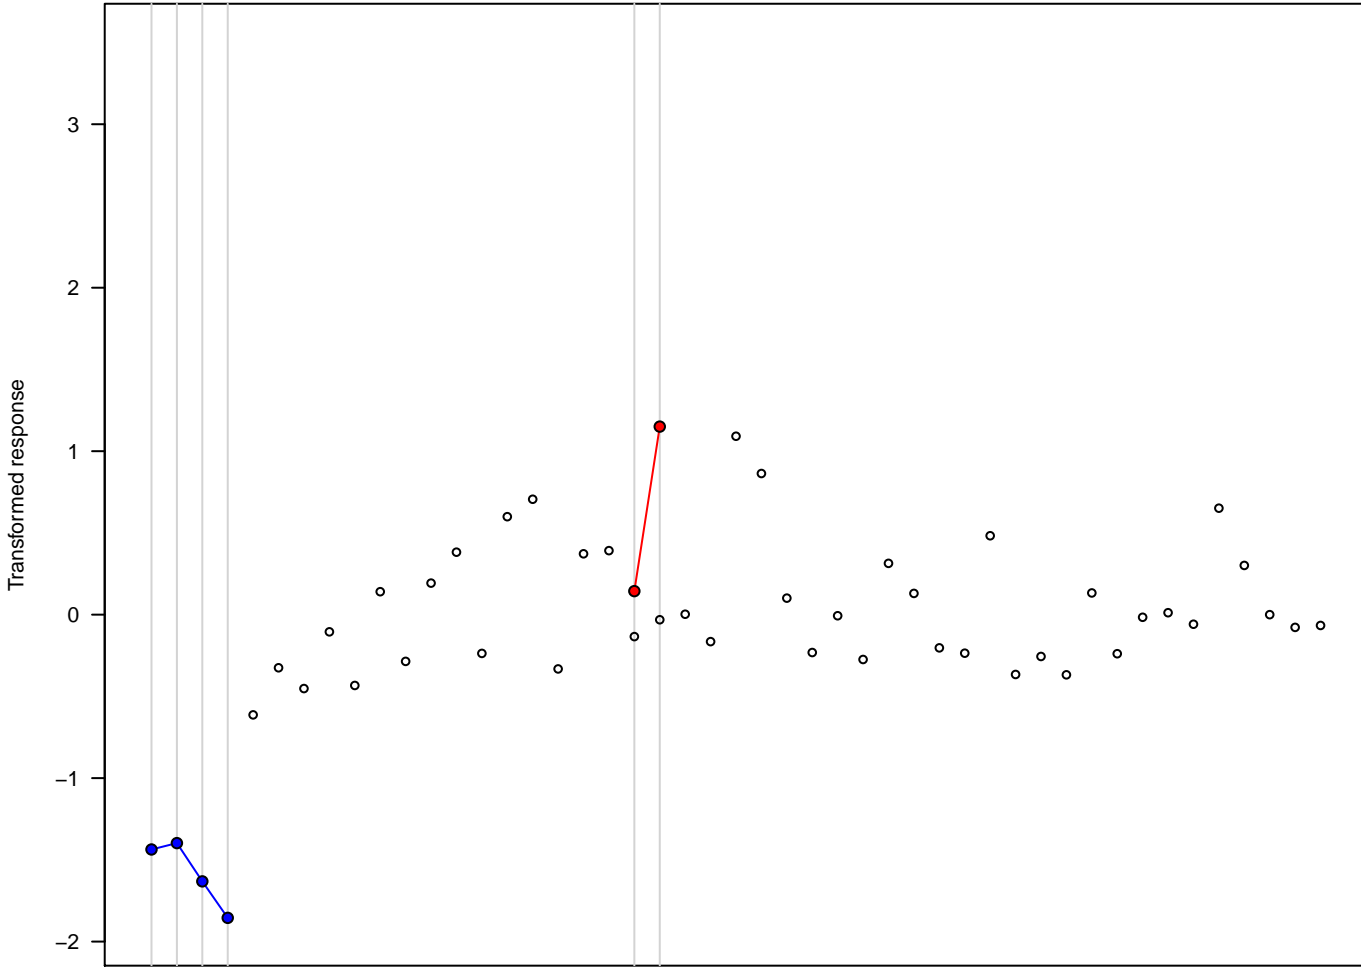

## MRC Harwell

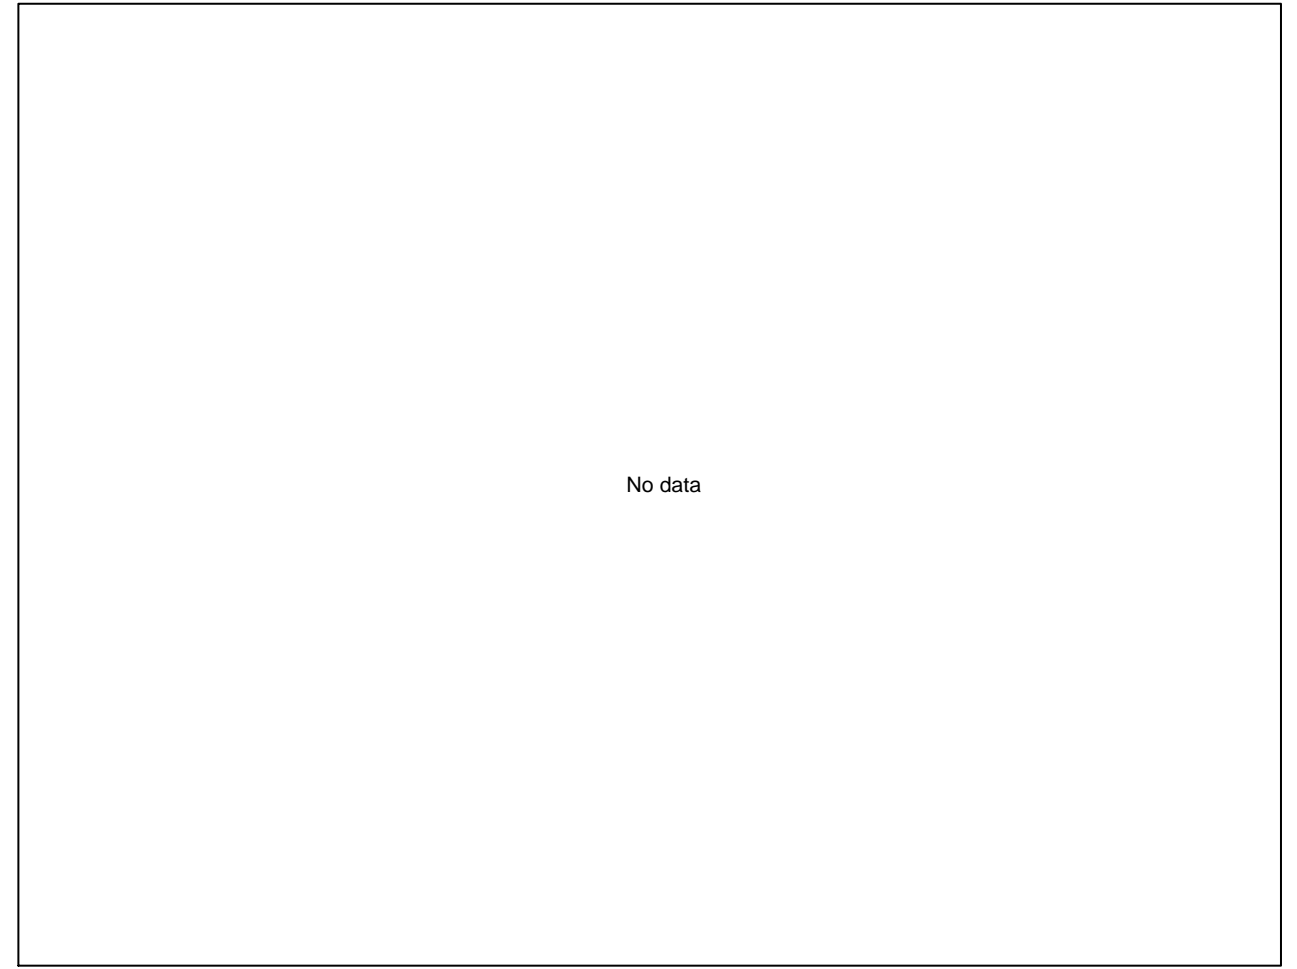

## WTSI

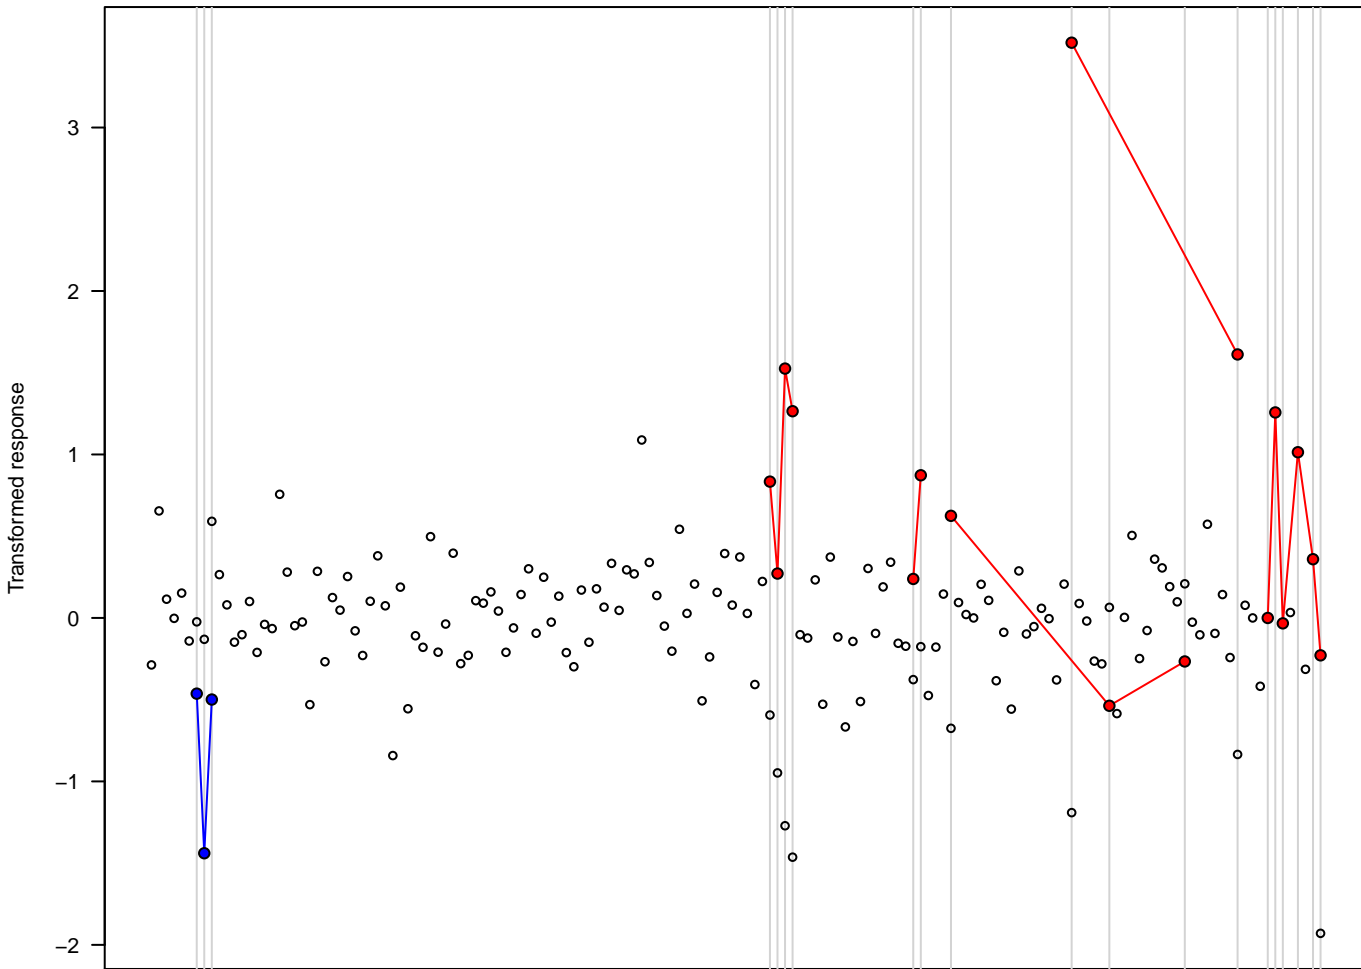

## ICS

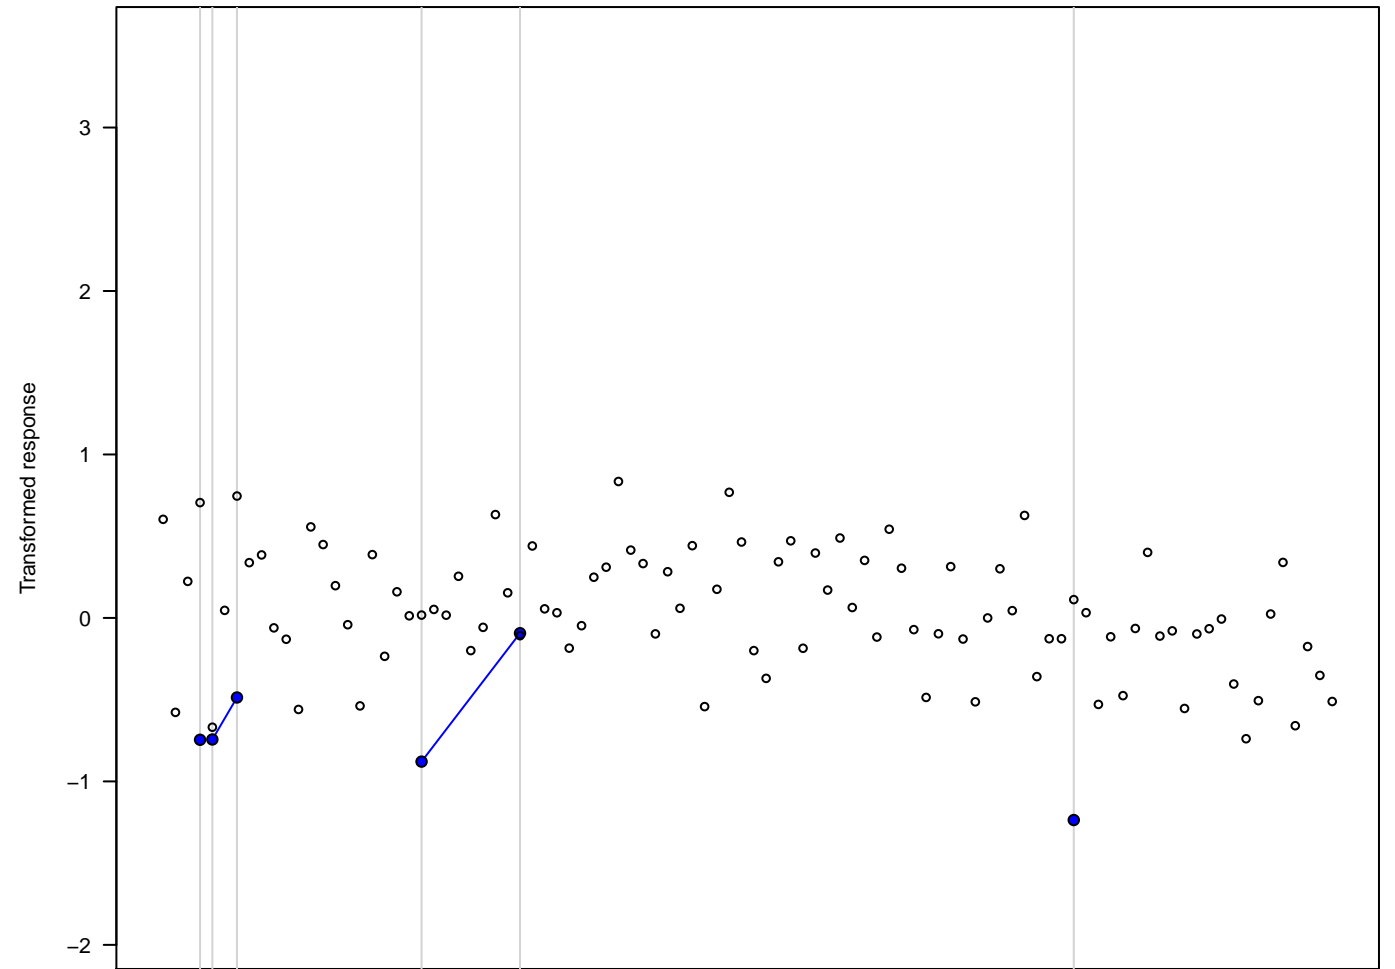

Dark Total activity  
(Calorimetry)

HMGU

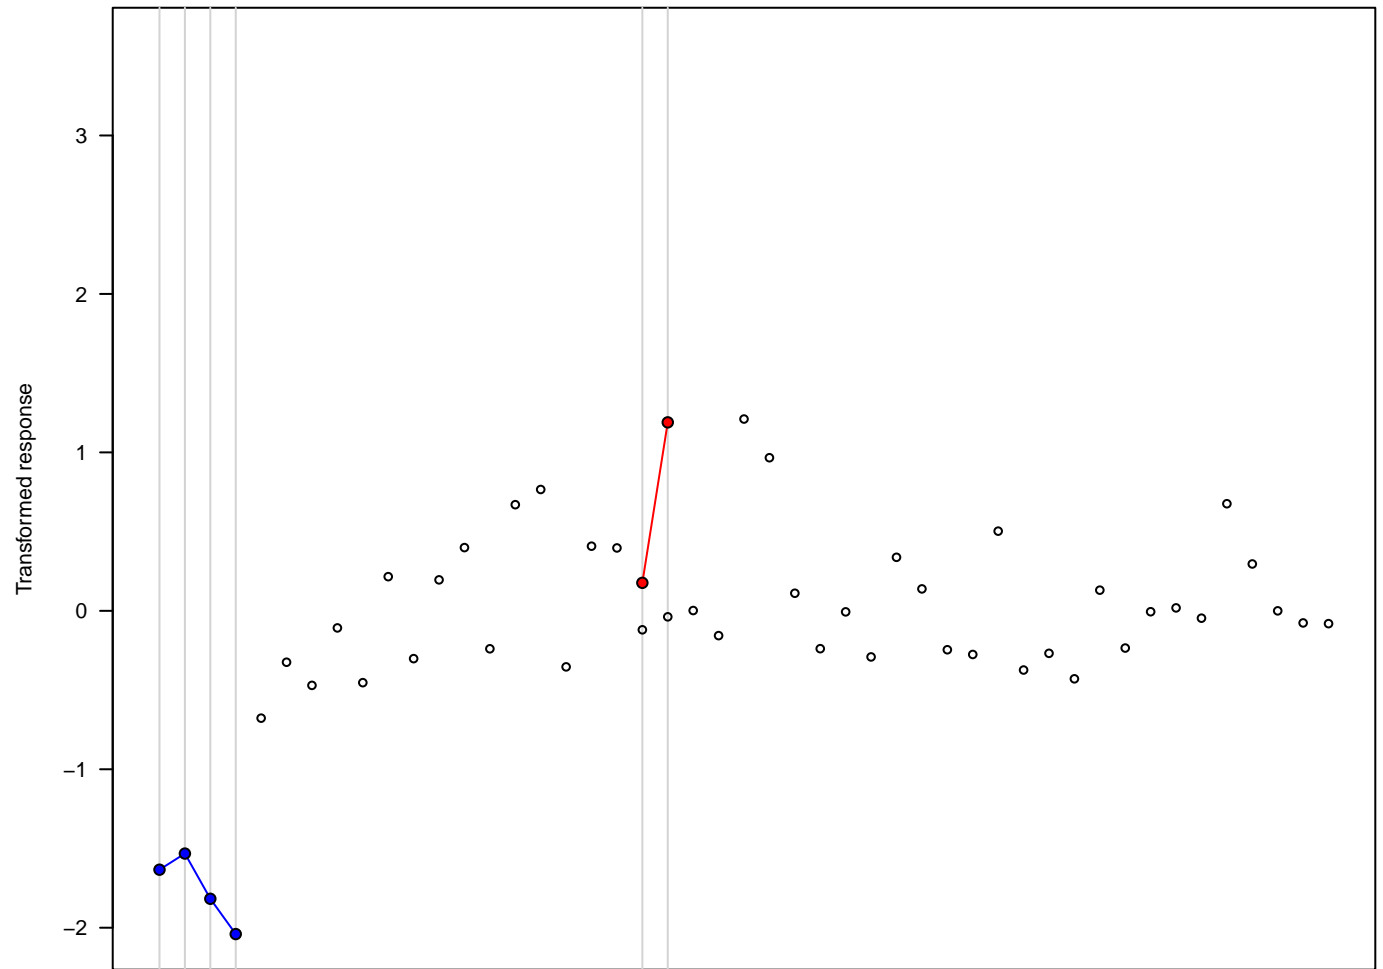

MRC Harwell

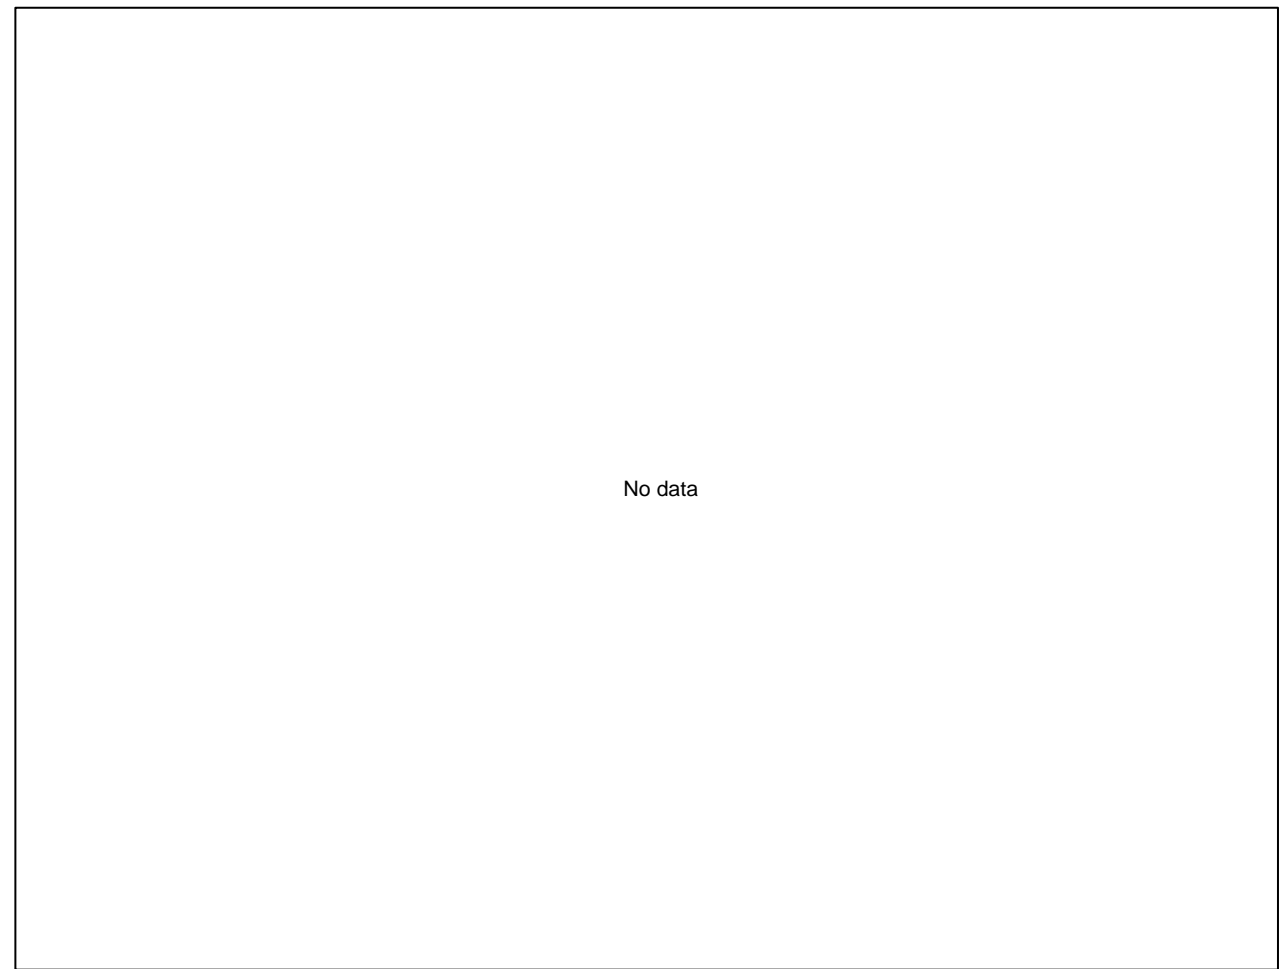

WTSI

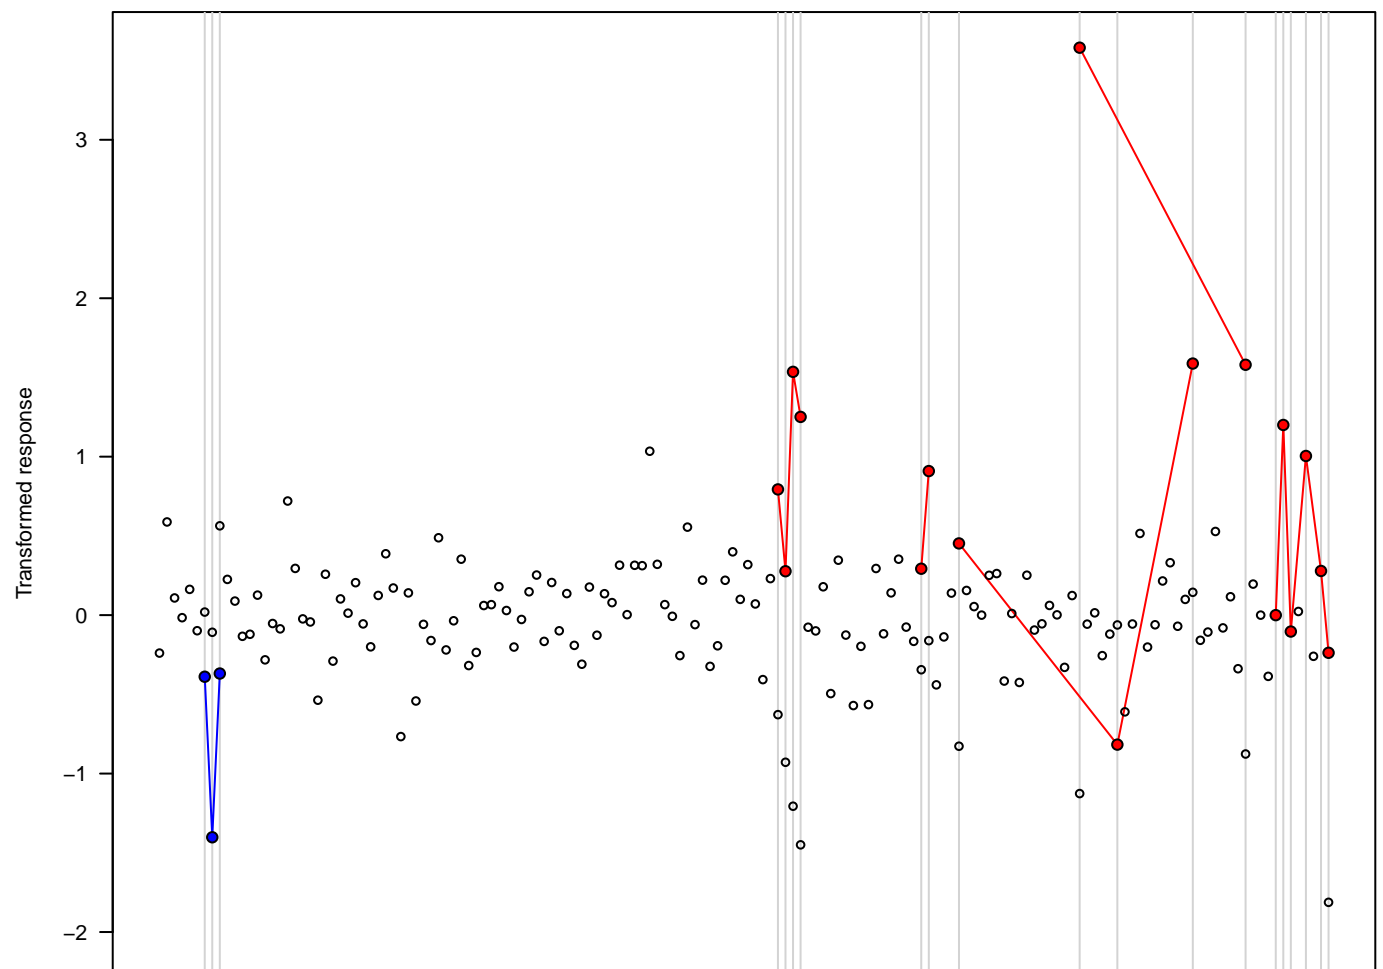

ICS

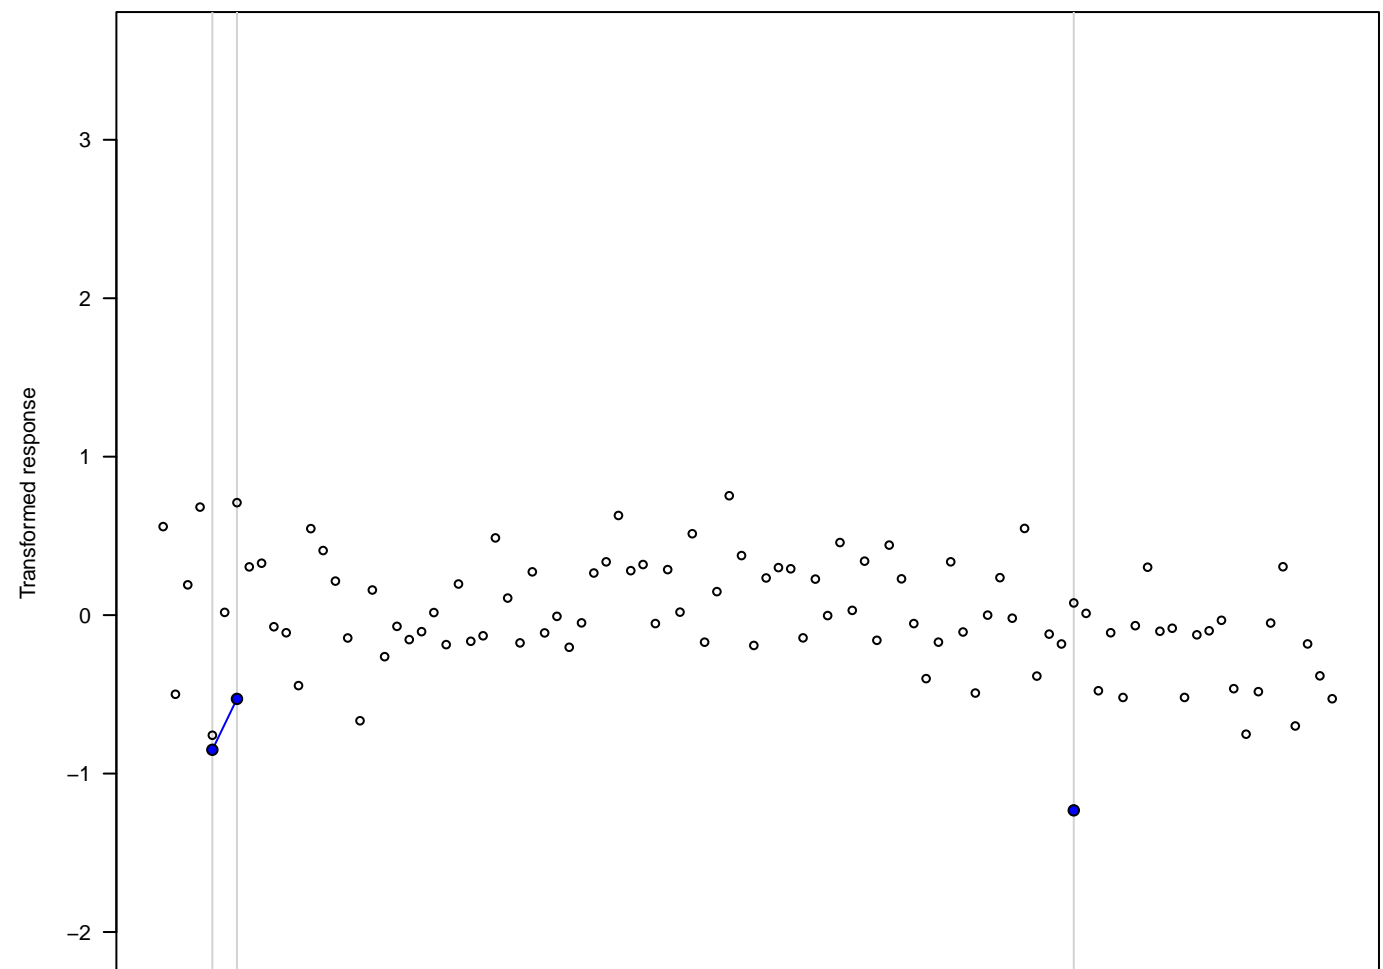

# Light Oxygen consumption (Calorimetry)

## HMGU

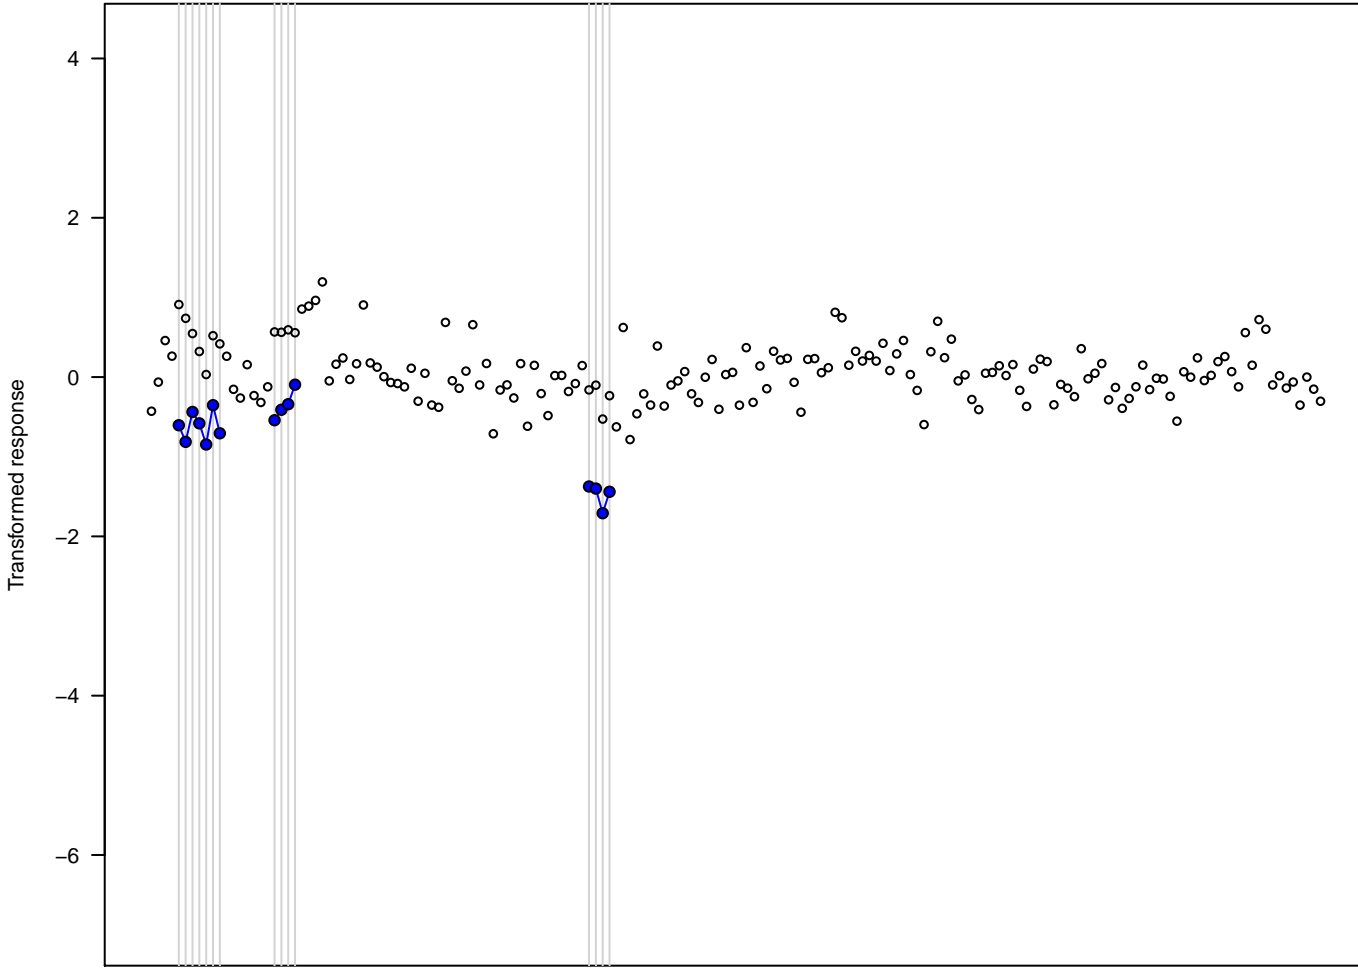

## MRC Harwell

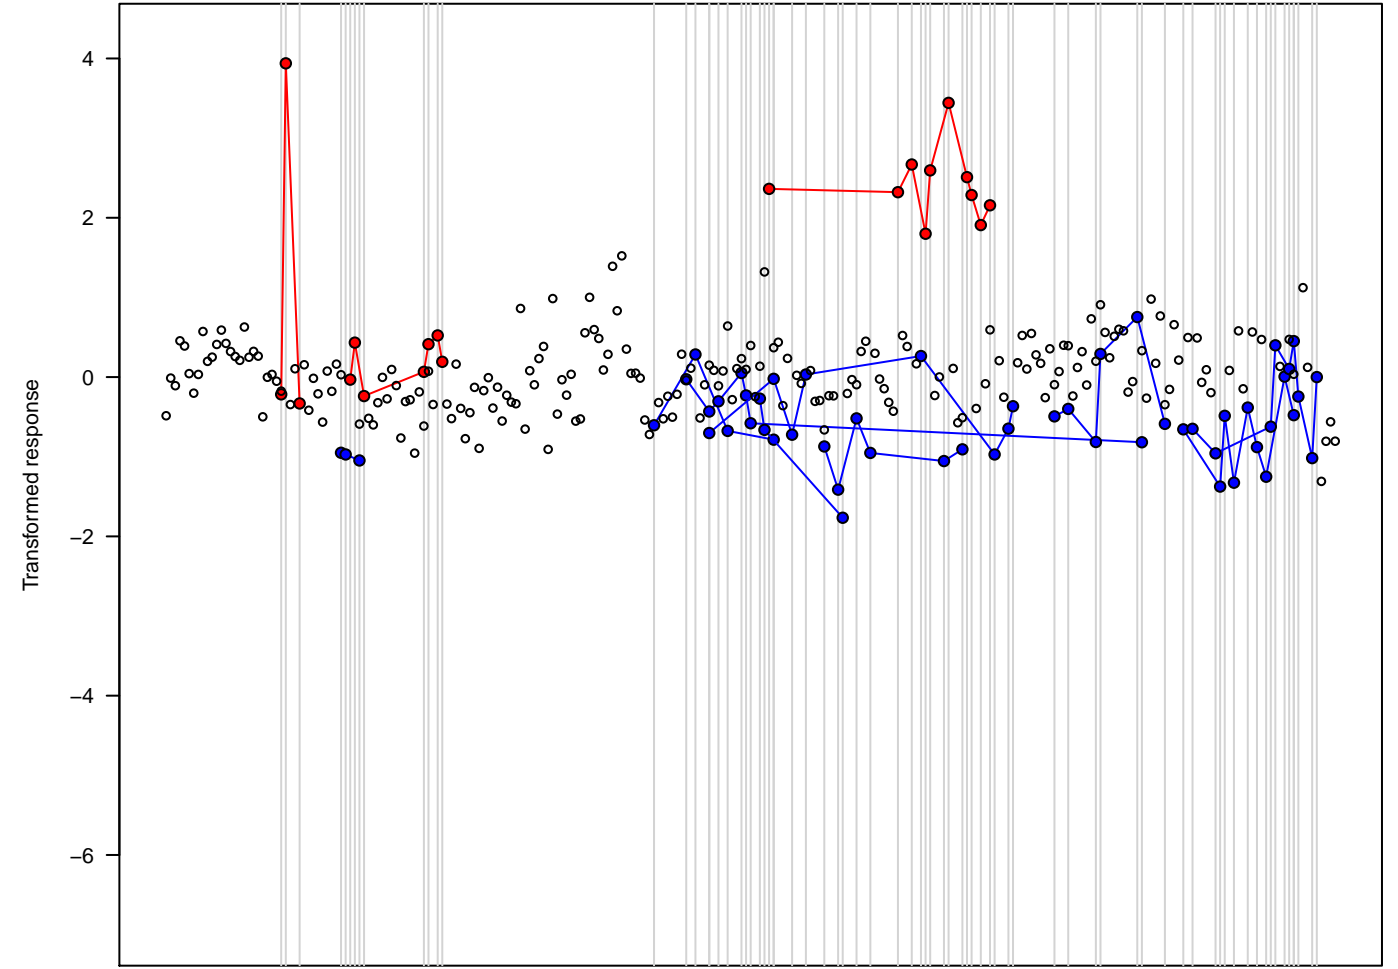

## WTSI

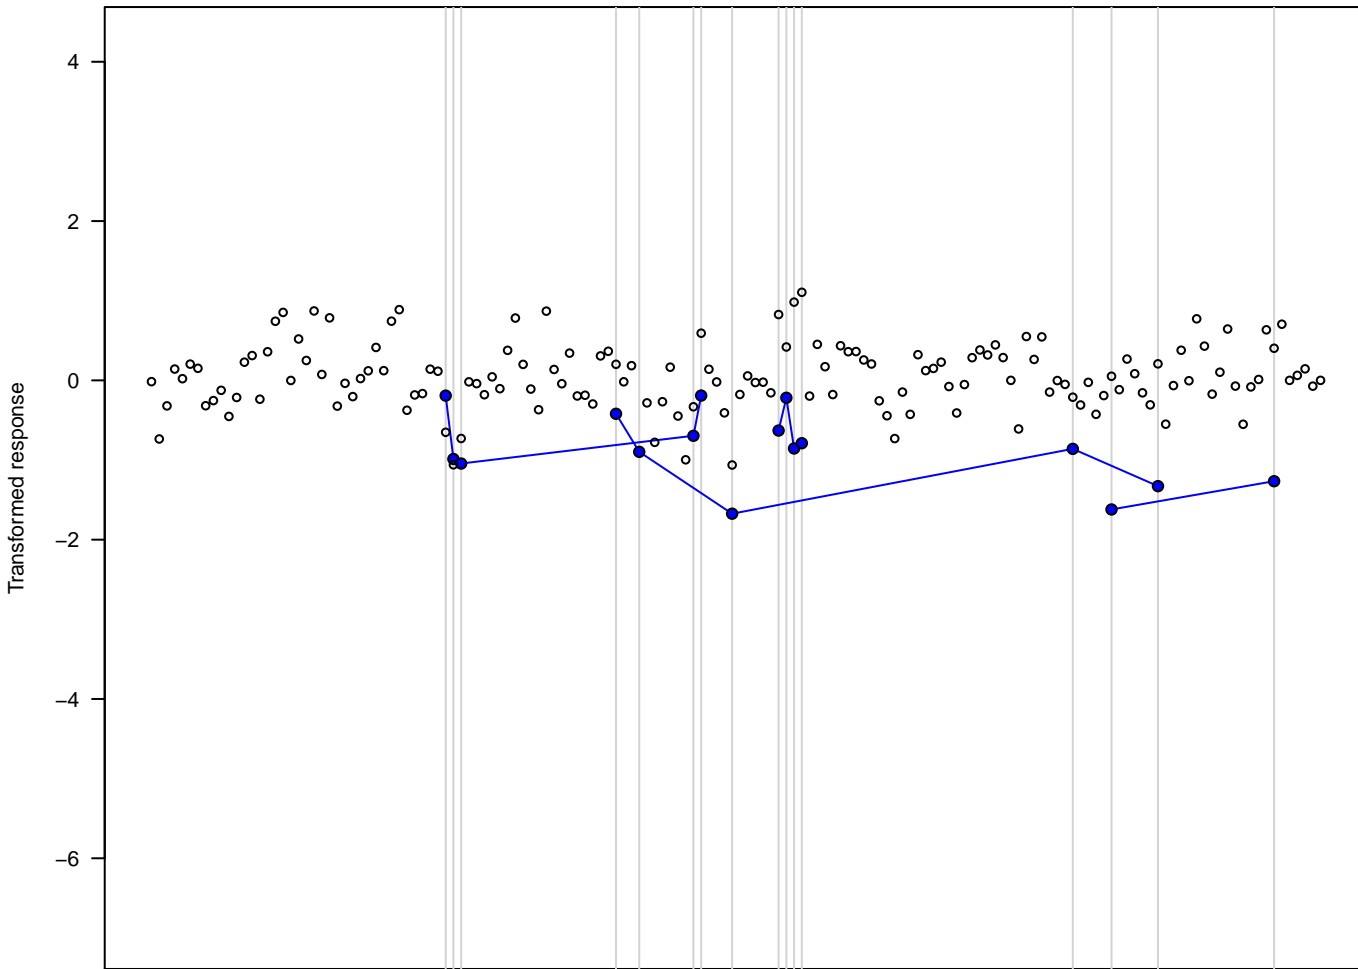

## ICS

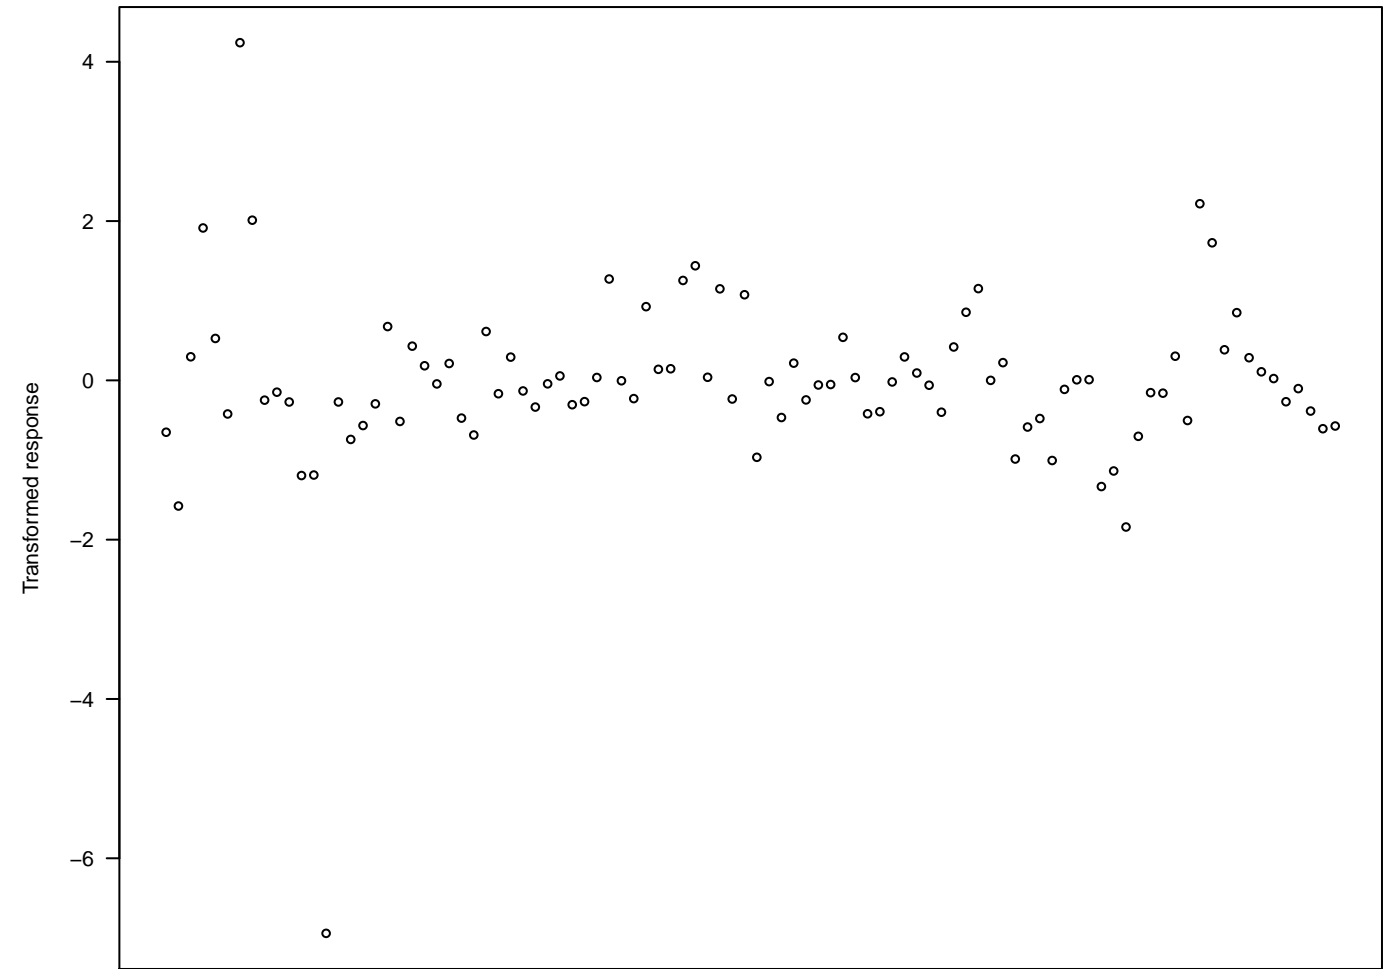

Light Carbon dioxide production  
(Calorimetry)

HMGU

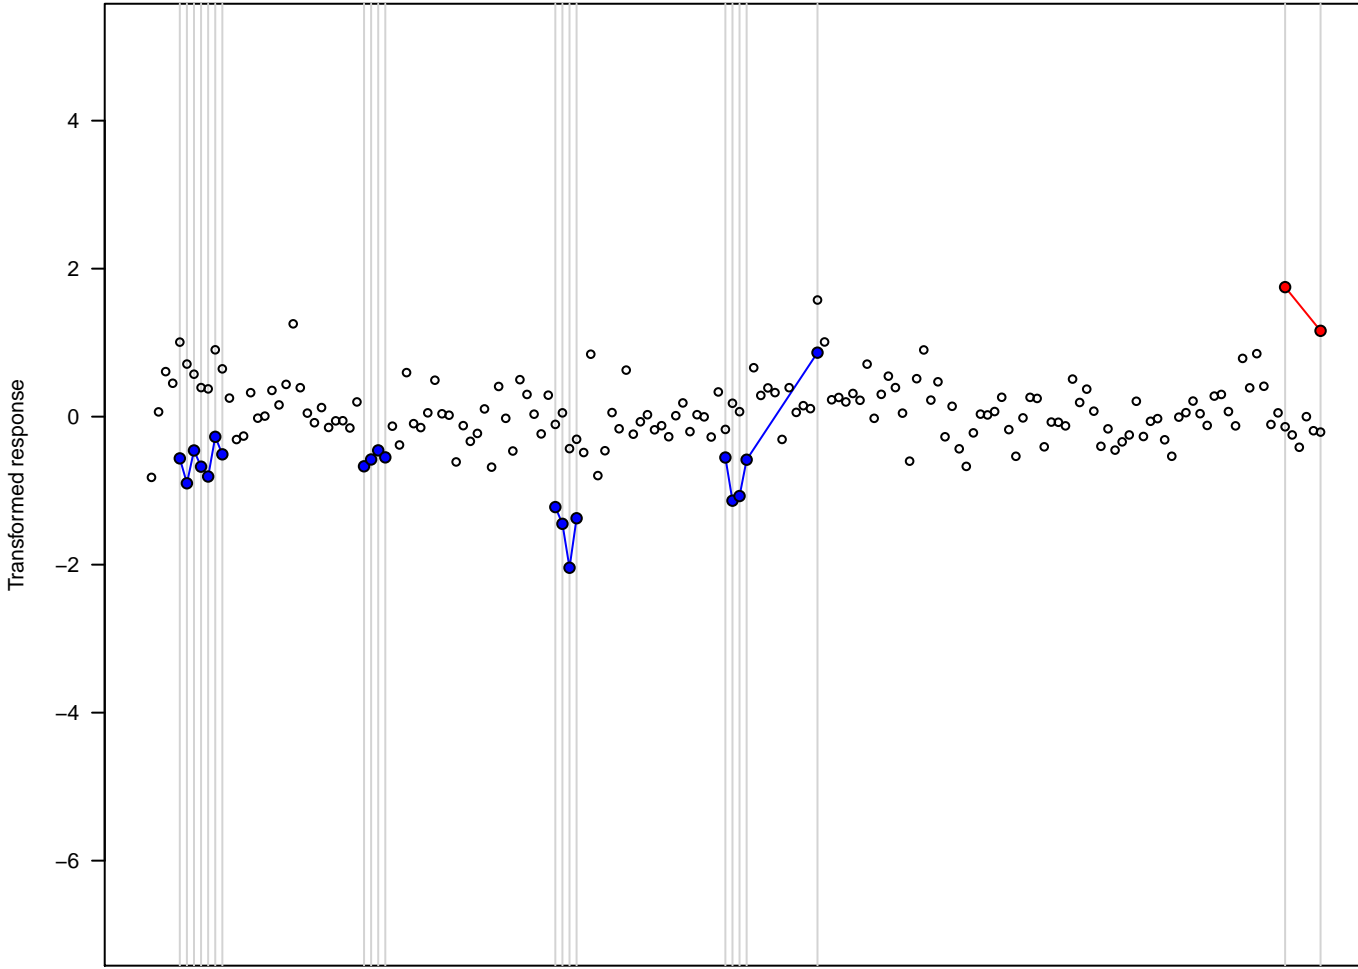

MRC Harwell

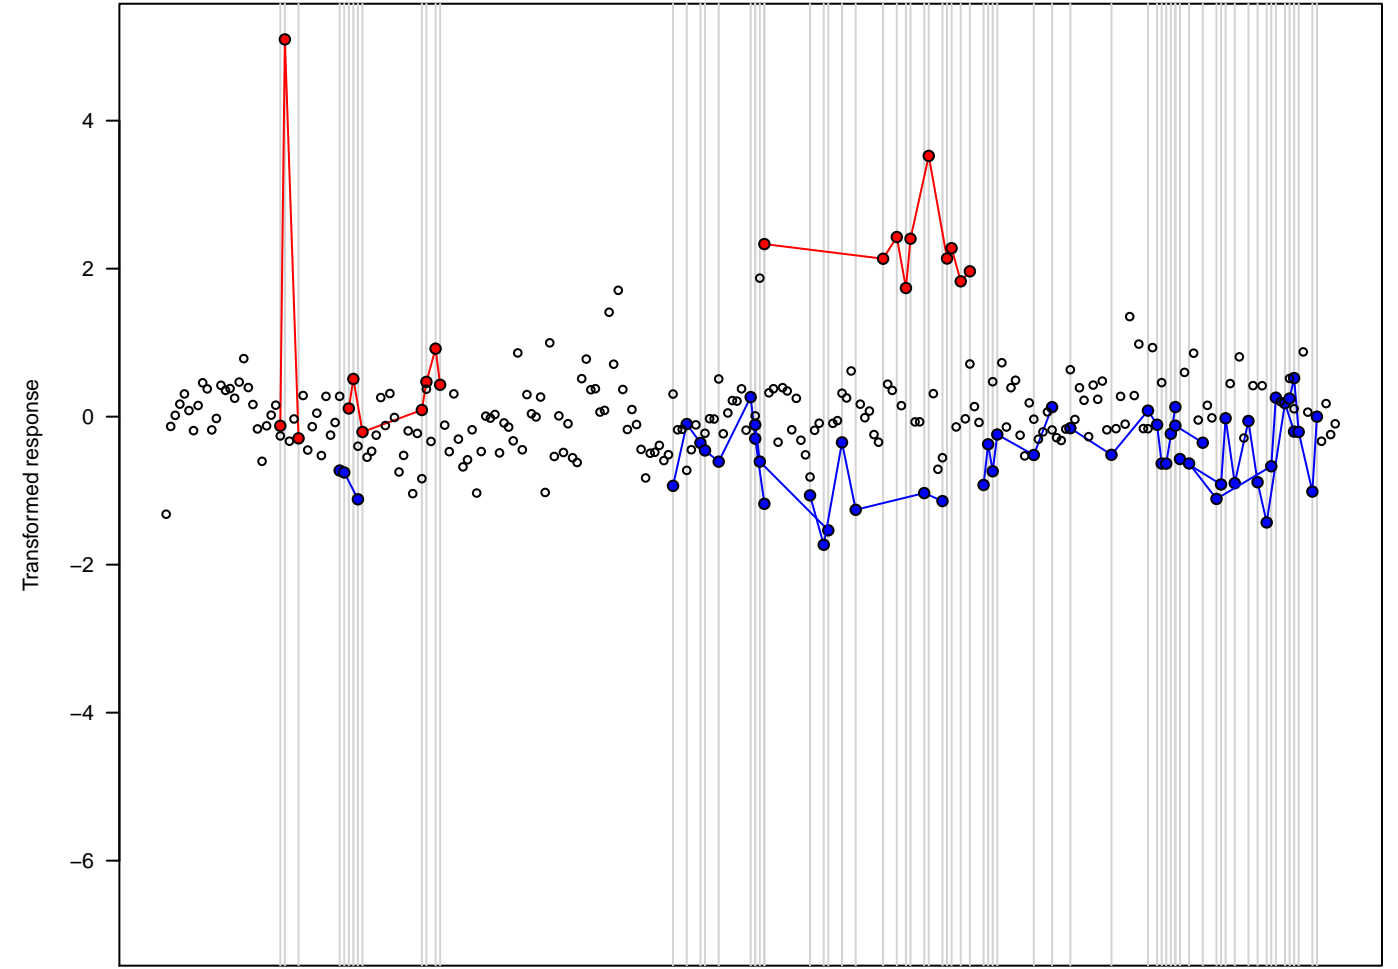

WTSI

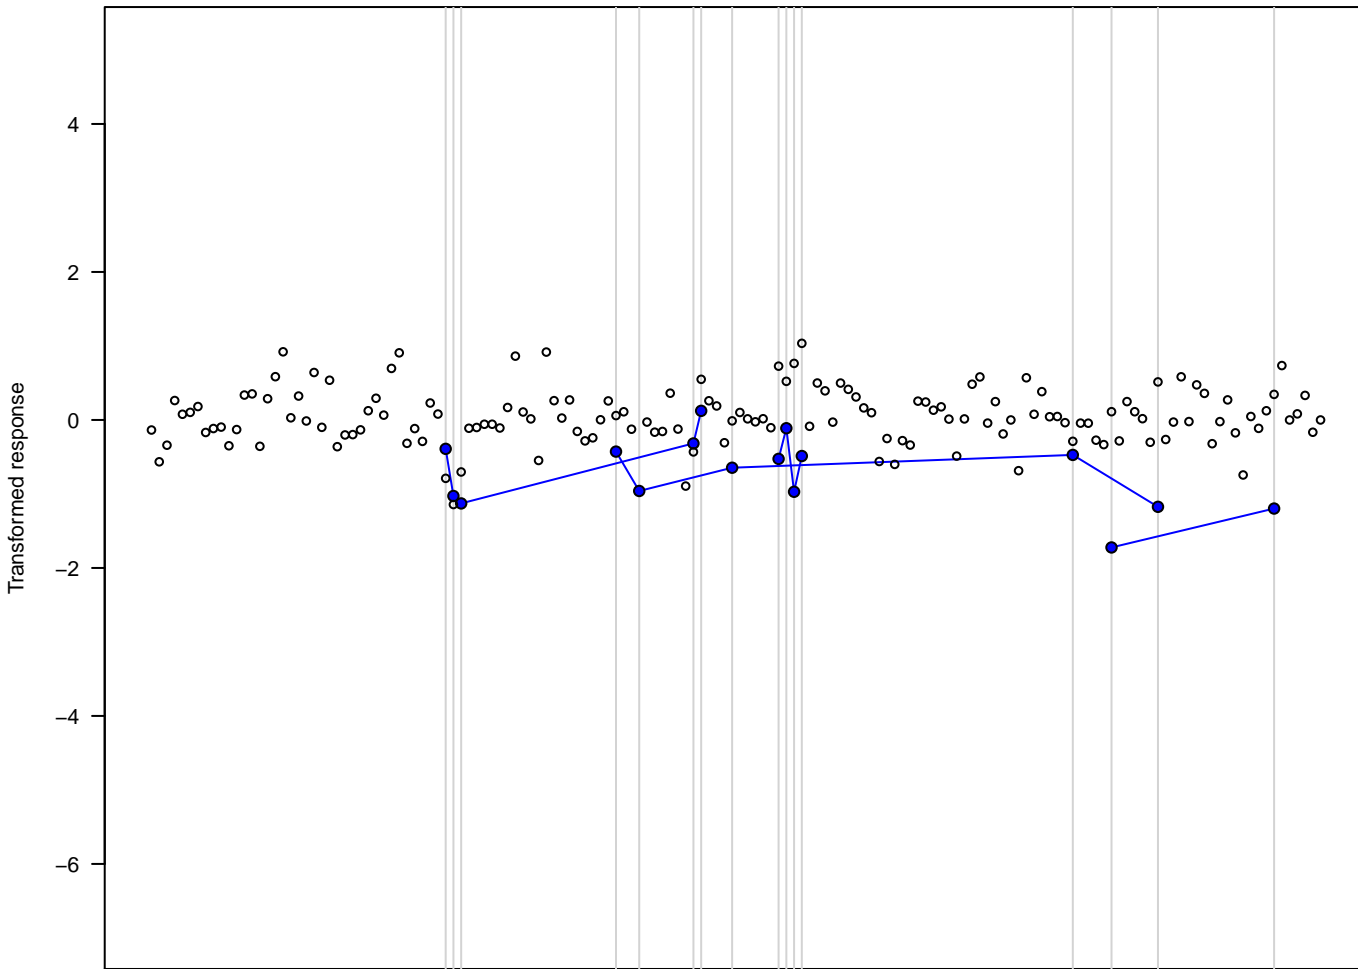

ICS

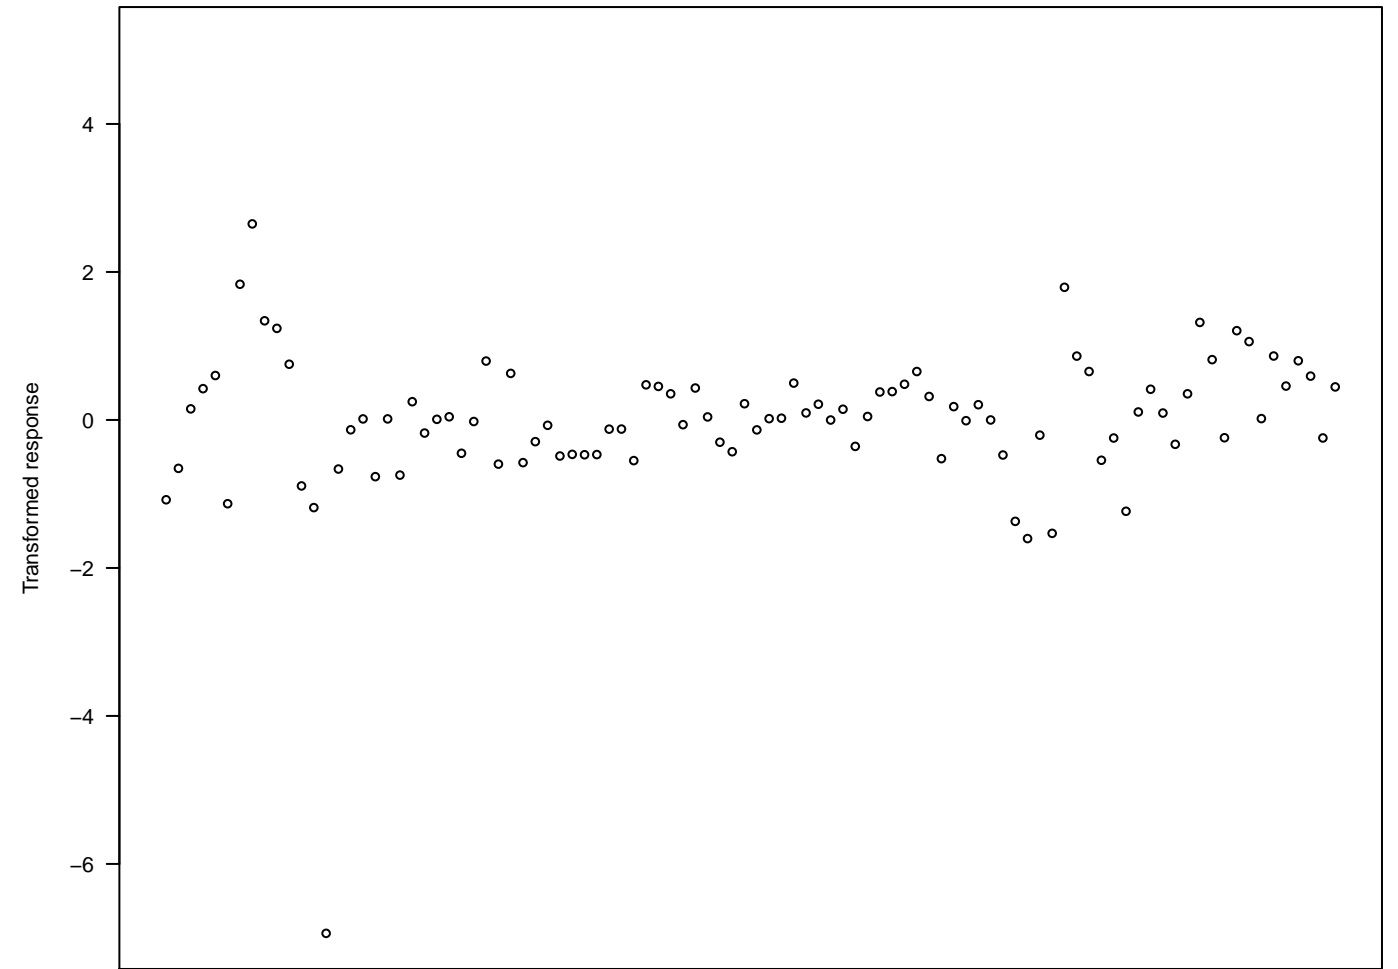

# Light Heat production (Calorimetry)

## HMGU

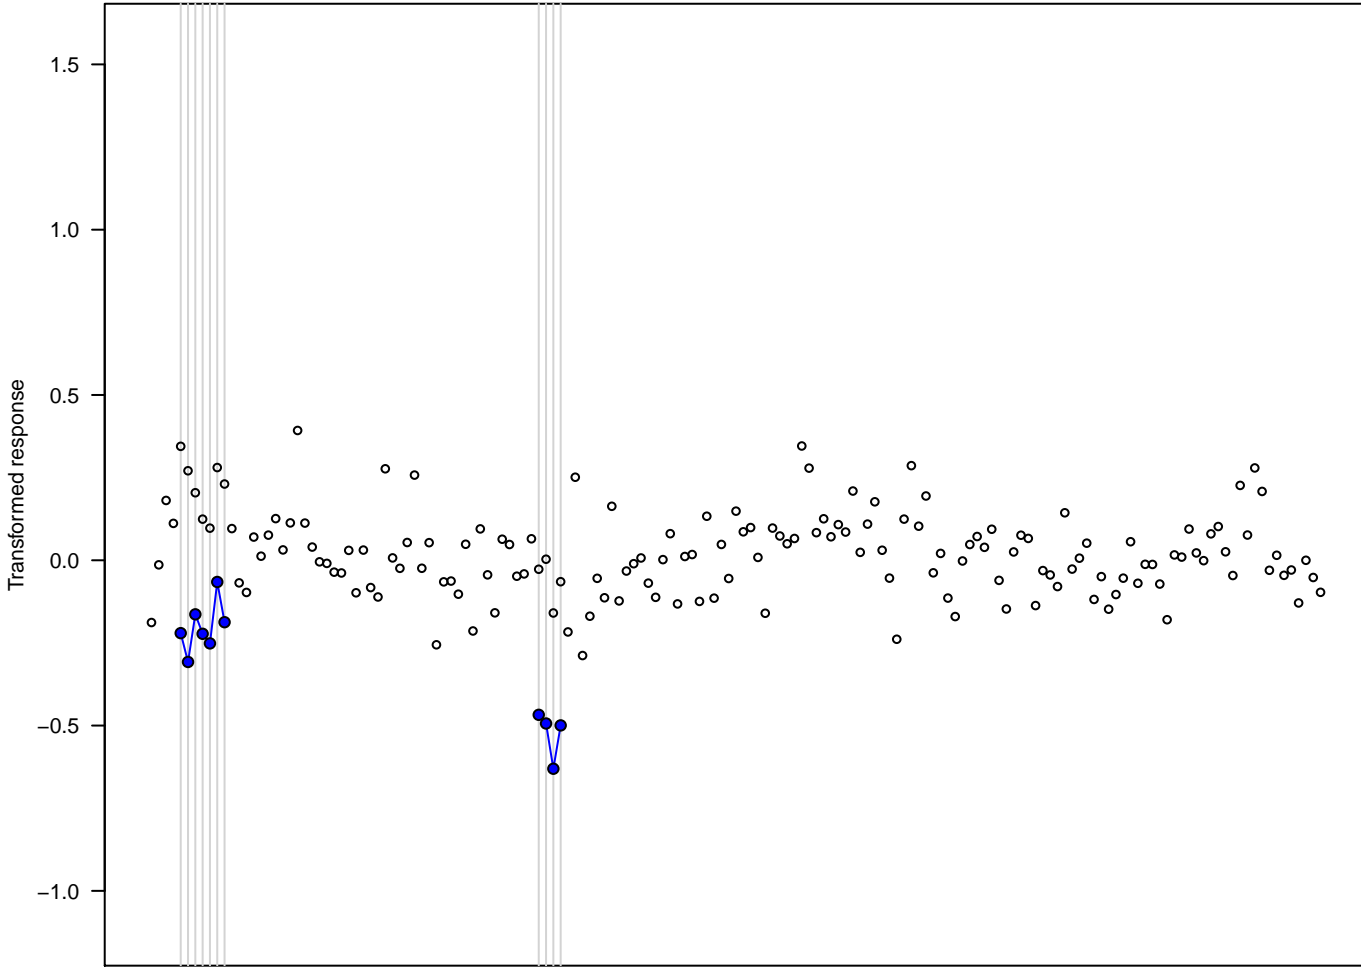

## MRC Harwell

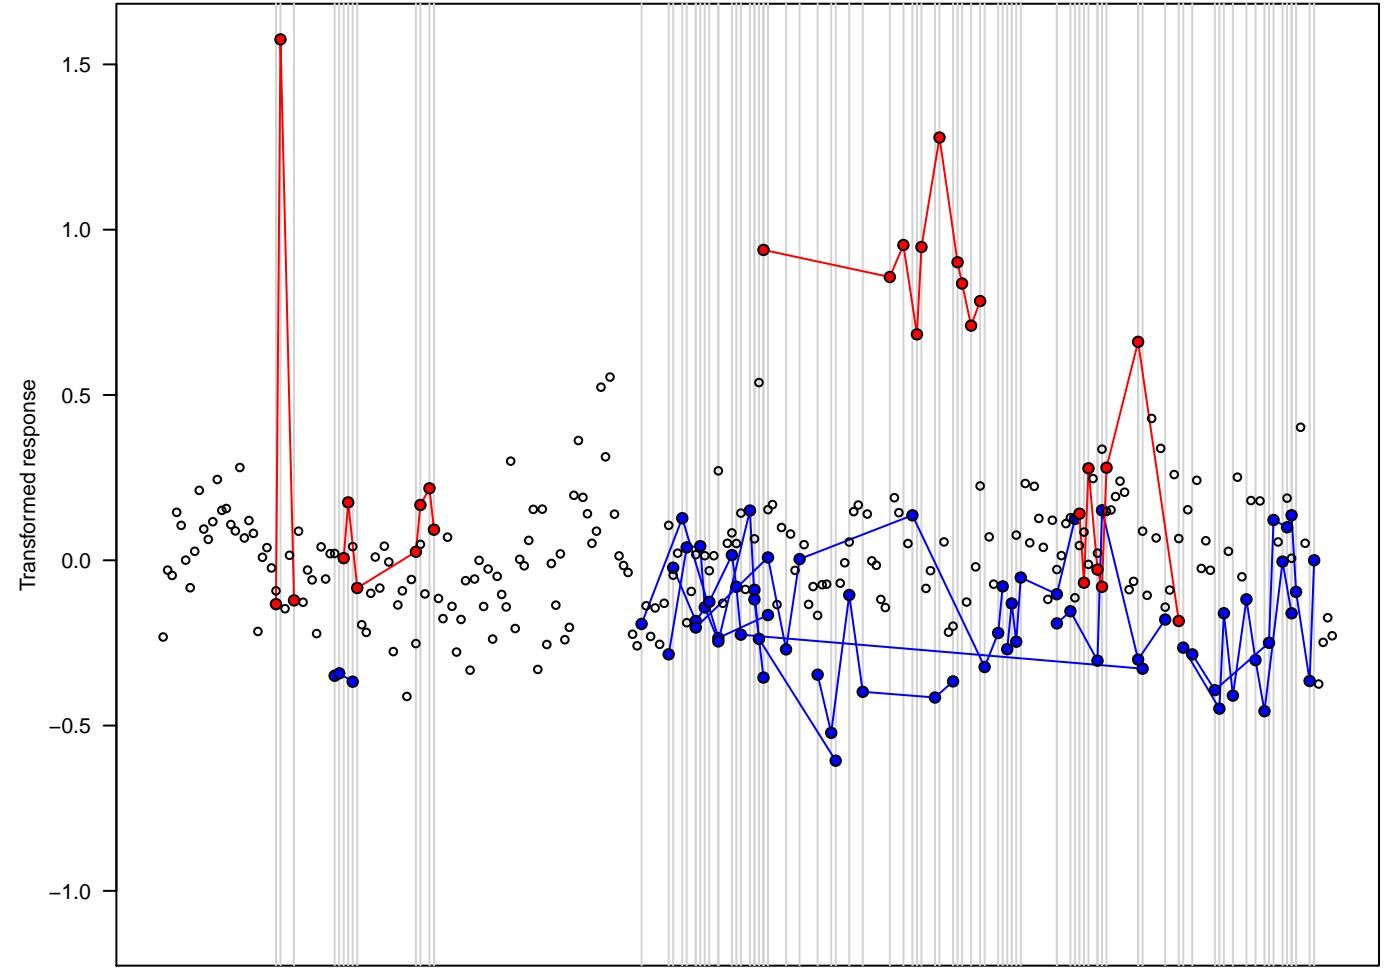

## WTSI

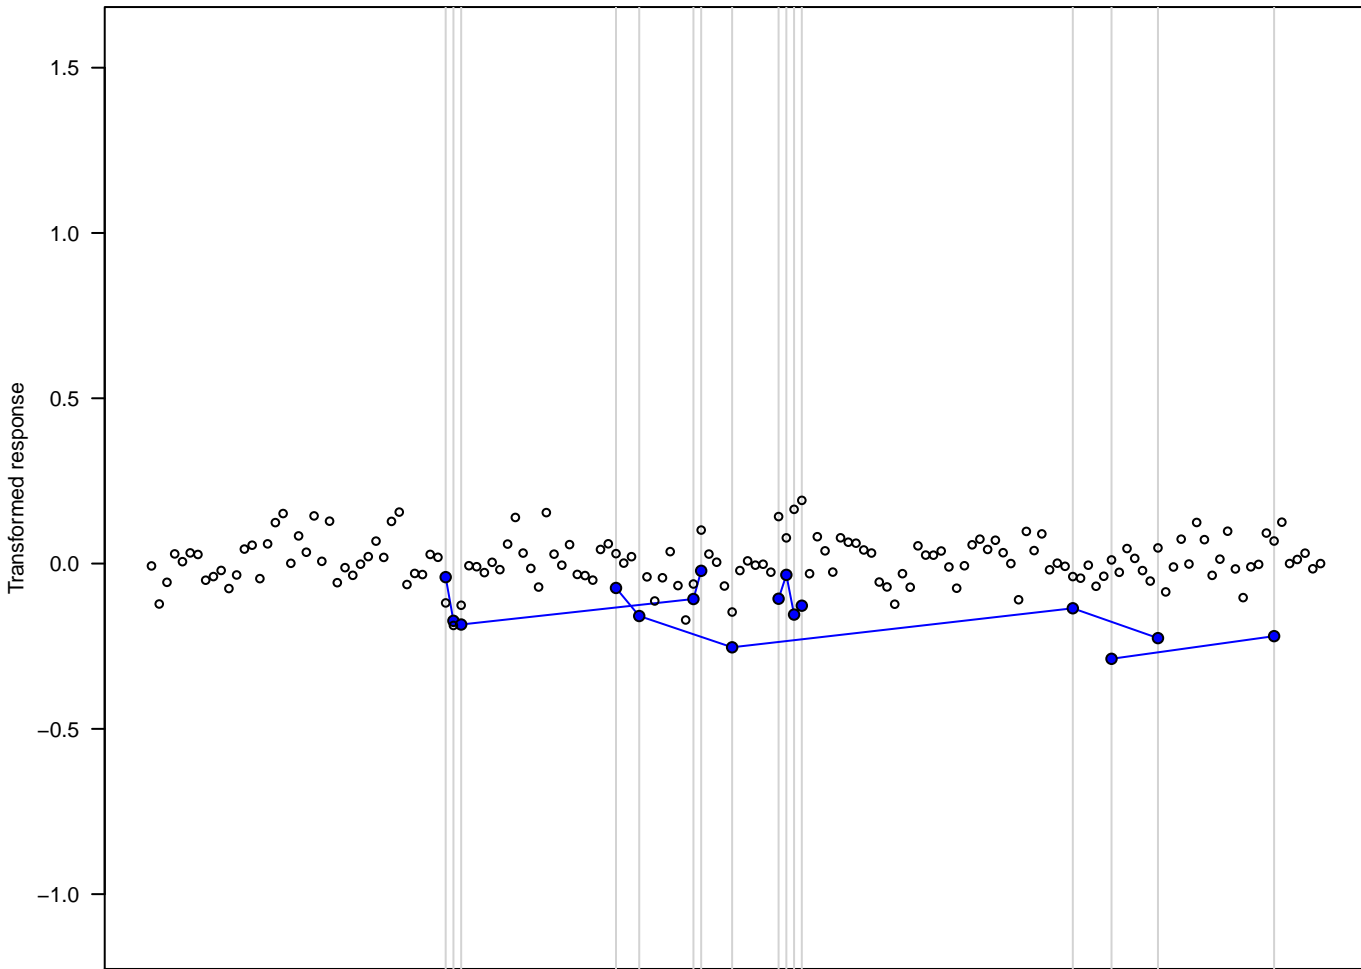

## ICS

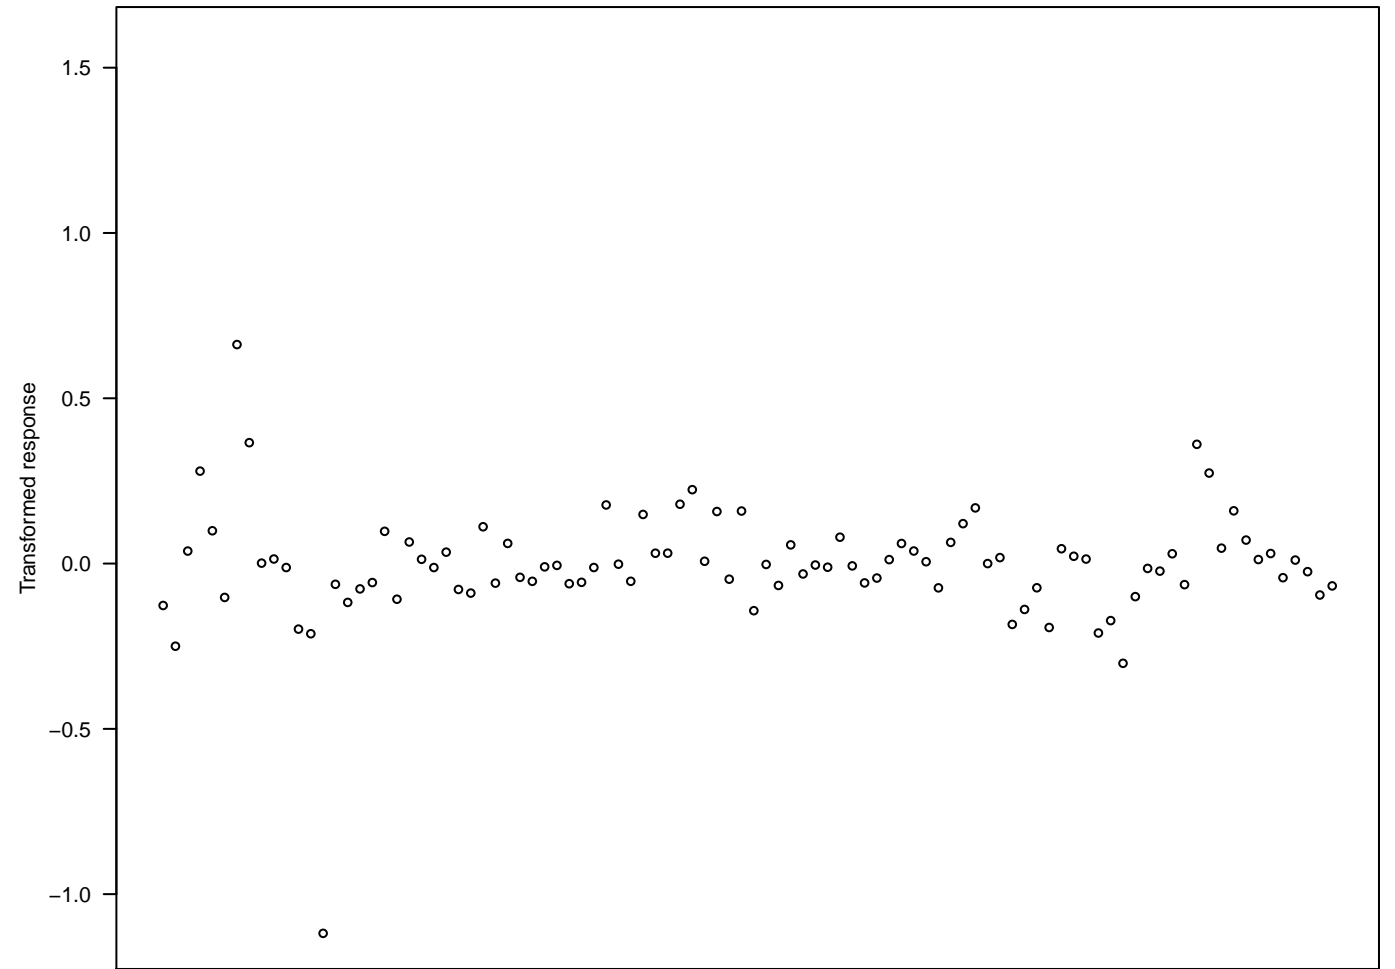

# Light Ambulatory activity (Calorimetry)

## HMGU

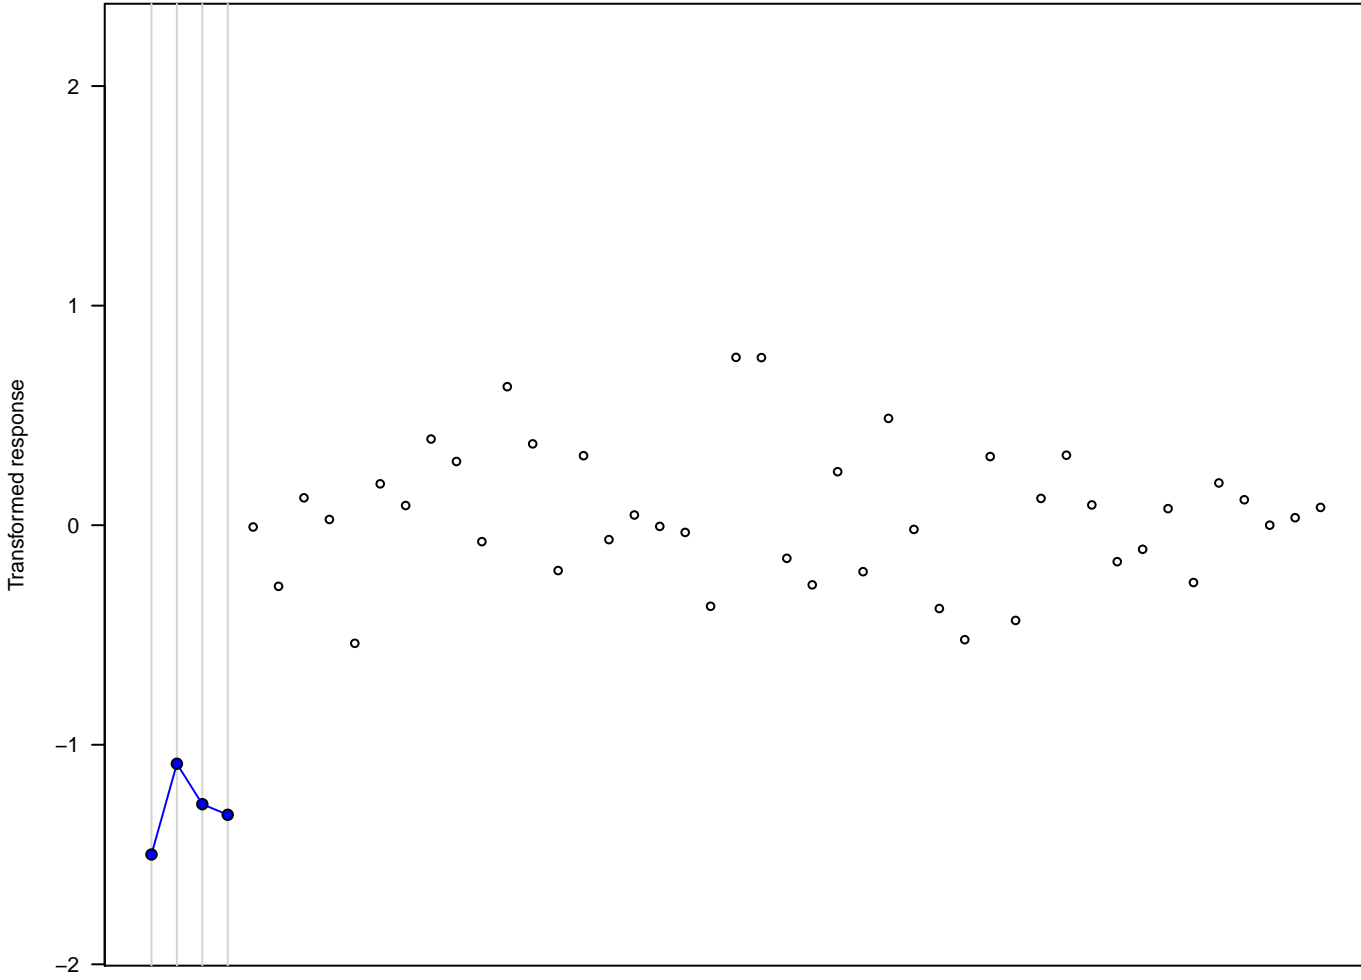

## MRC Harwell

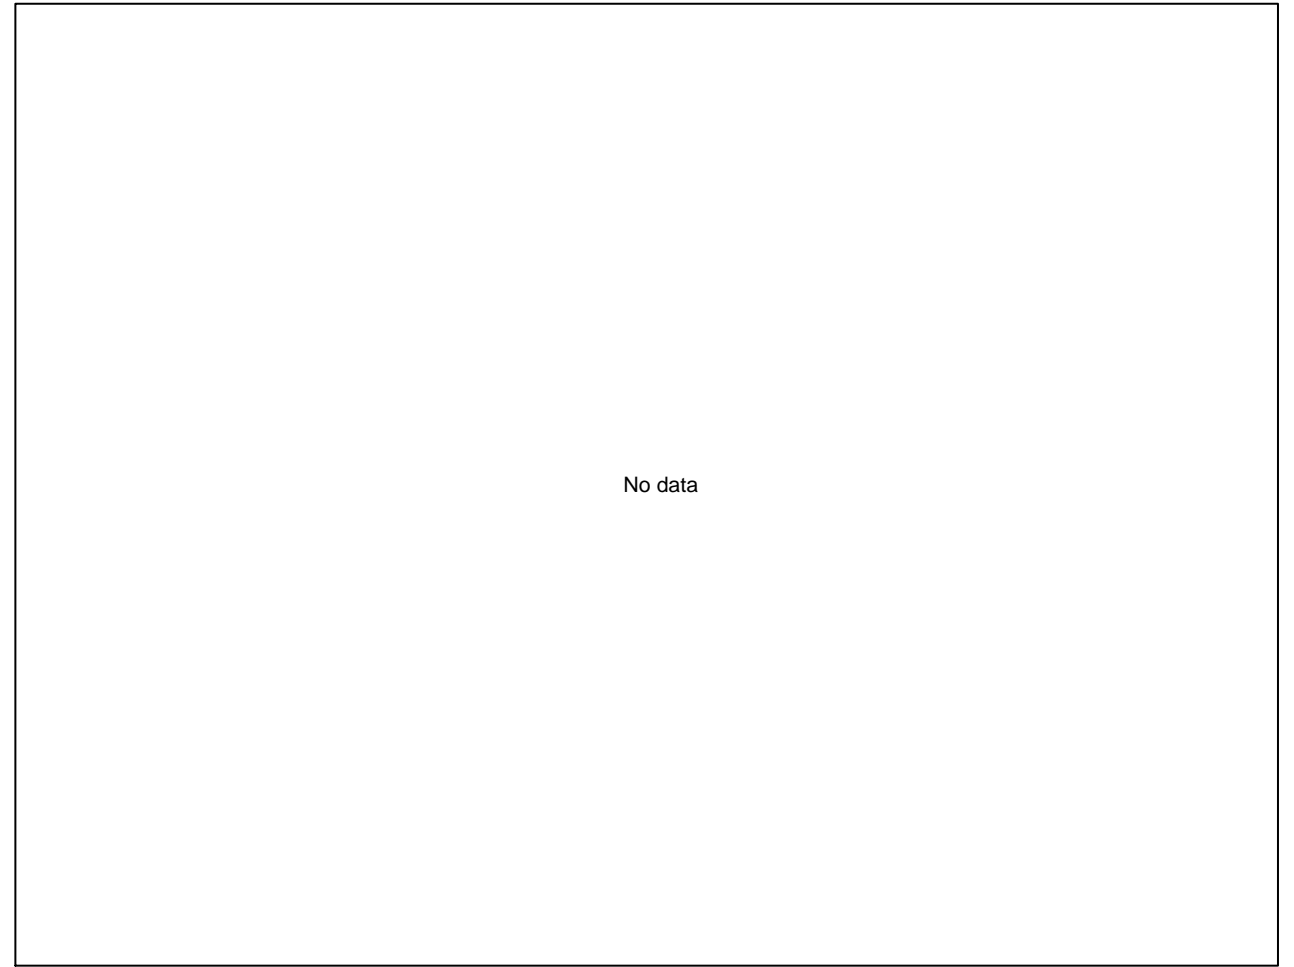

## WTSI

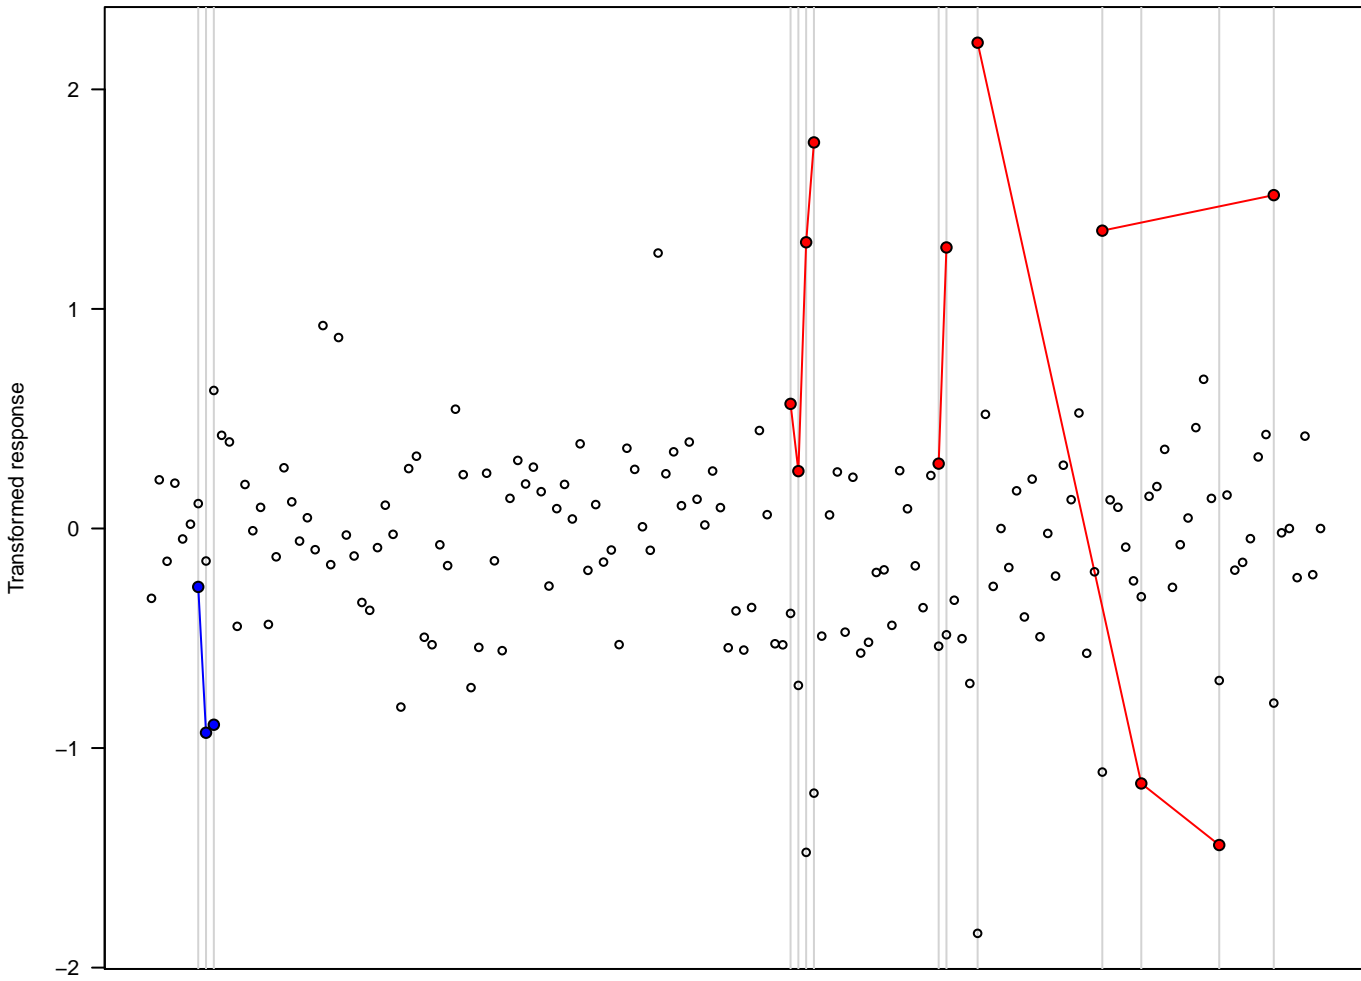

## ICS

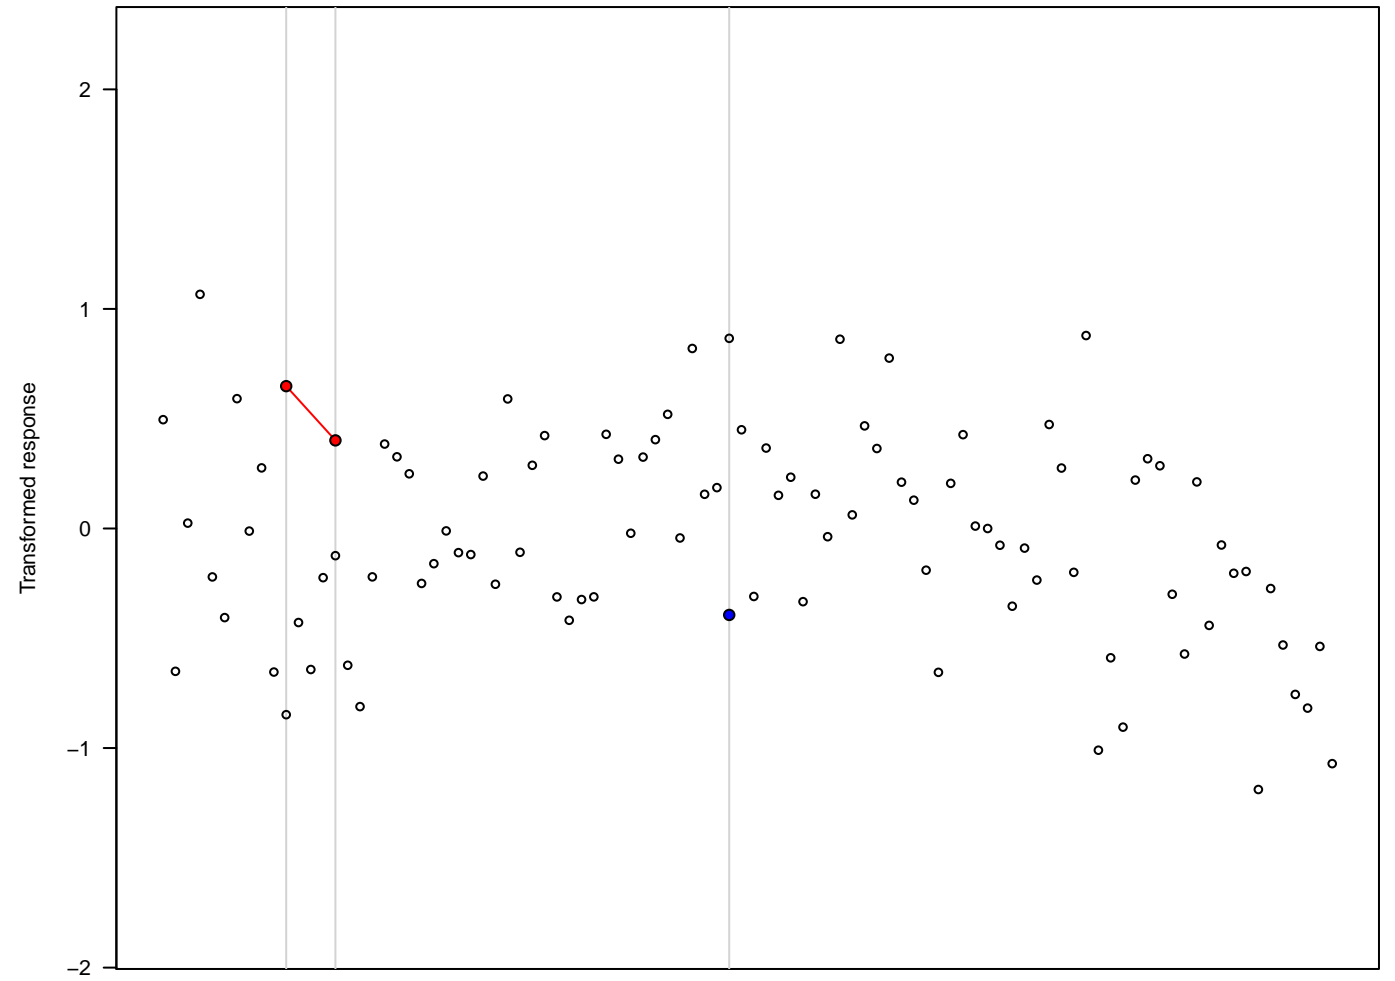

Light Total activity  
(Calorimetry)

HMGU

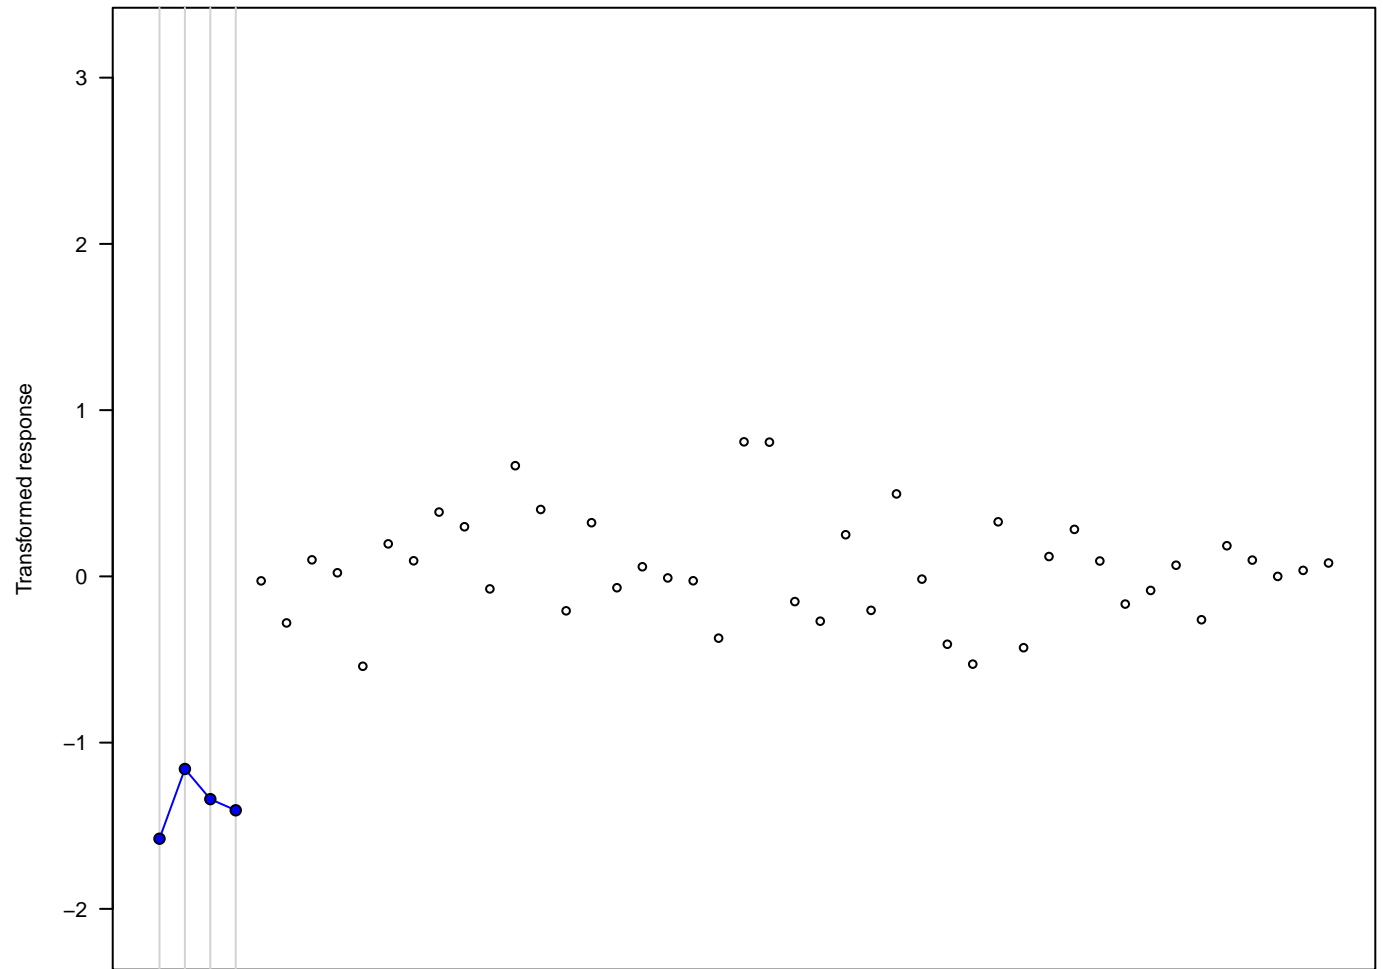

MRC Harwell



WTSI

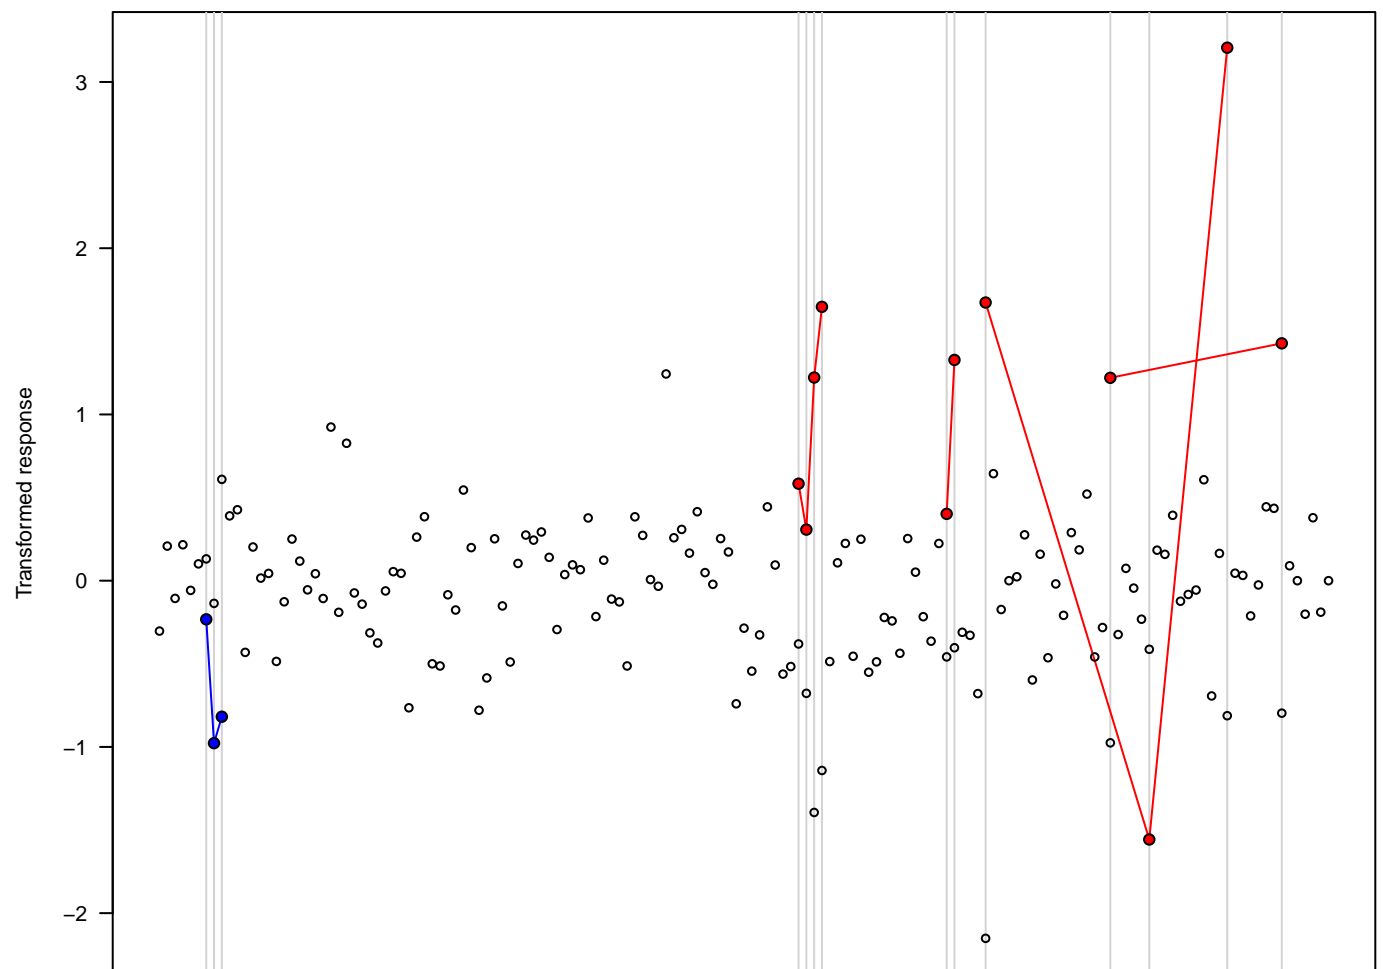

ICS

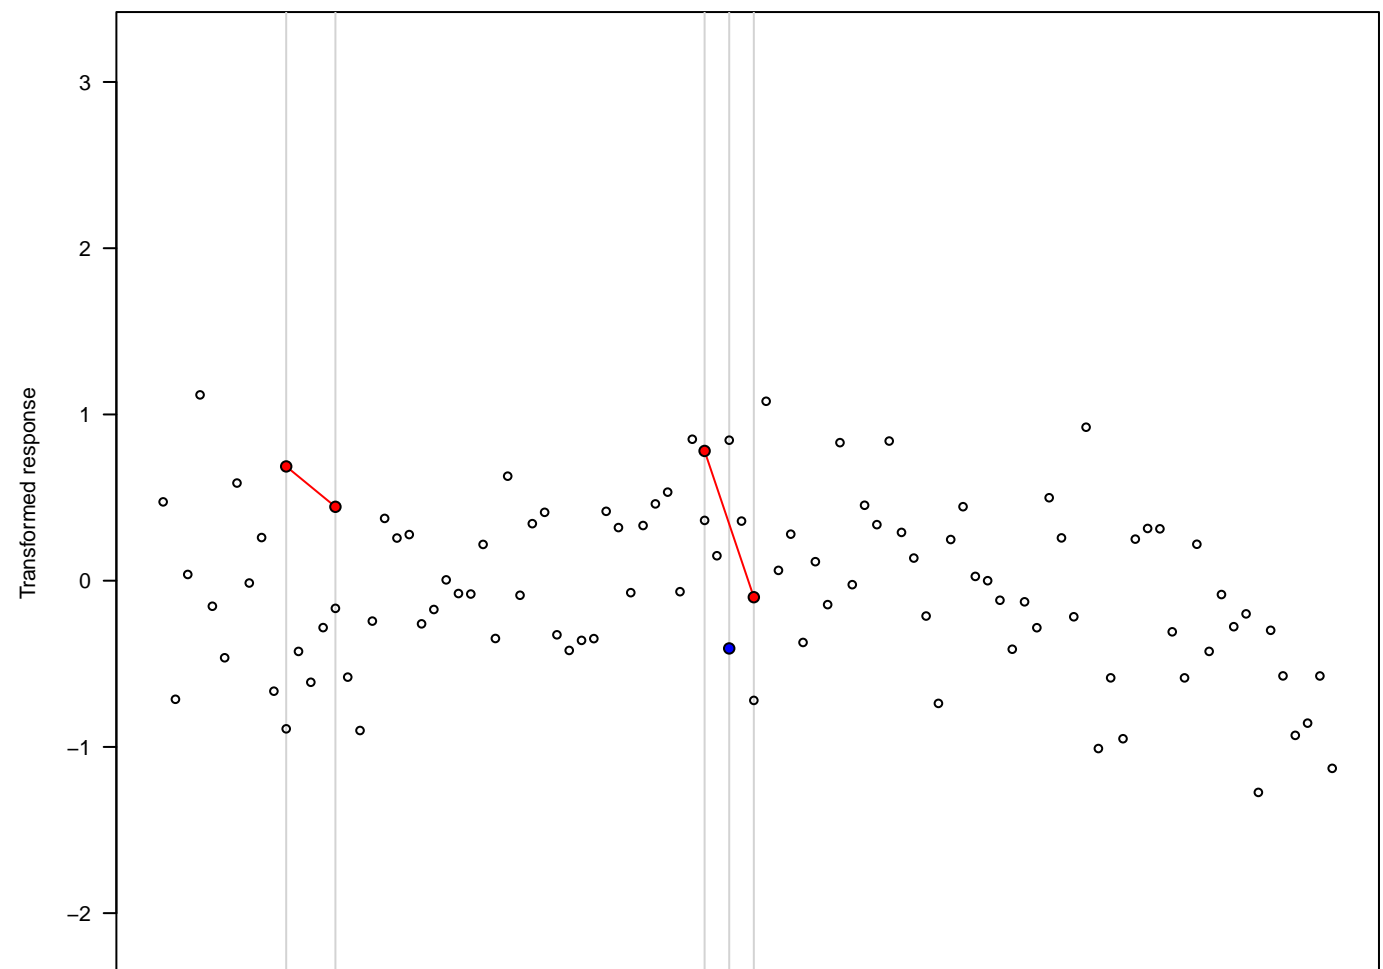

Start Dark Oxygen consumption  
(Calorimetry)

HMGU

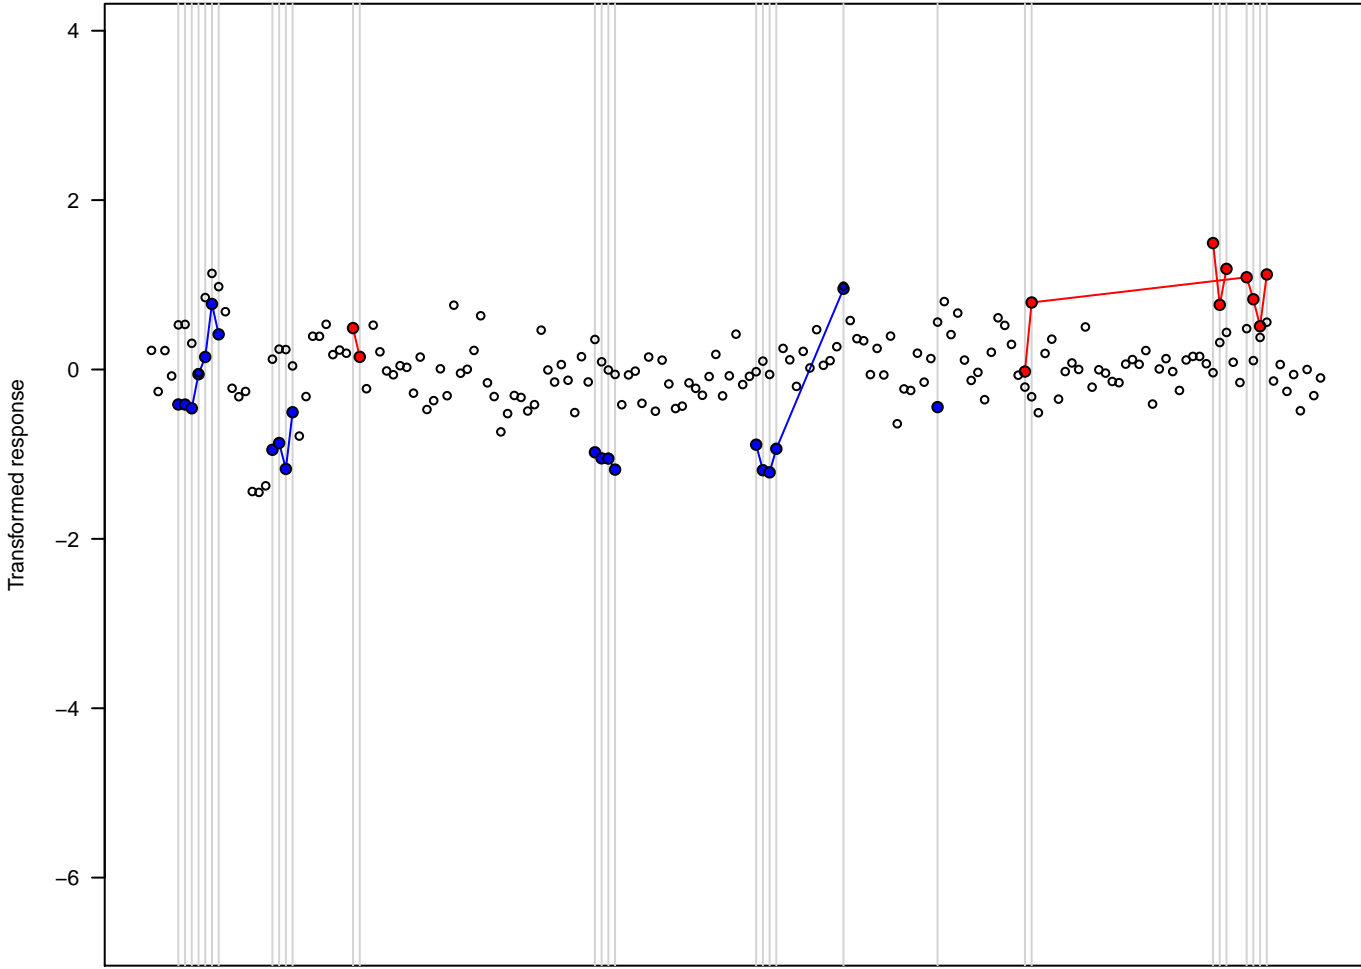

MRC Harwell

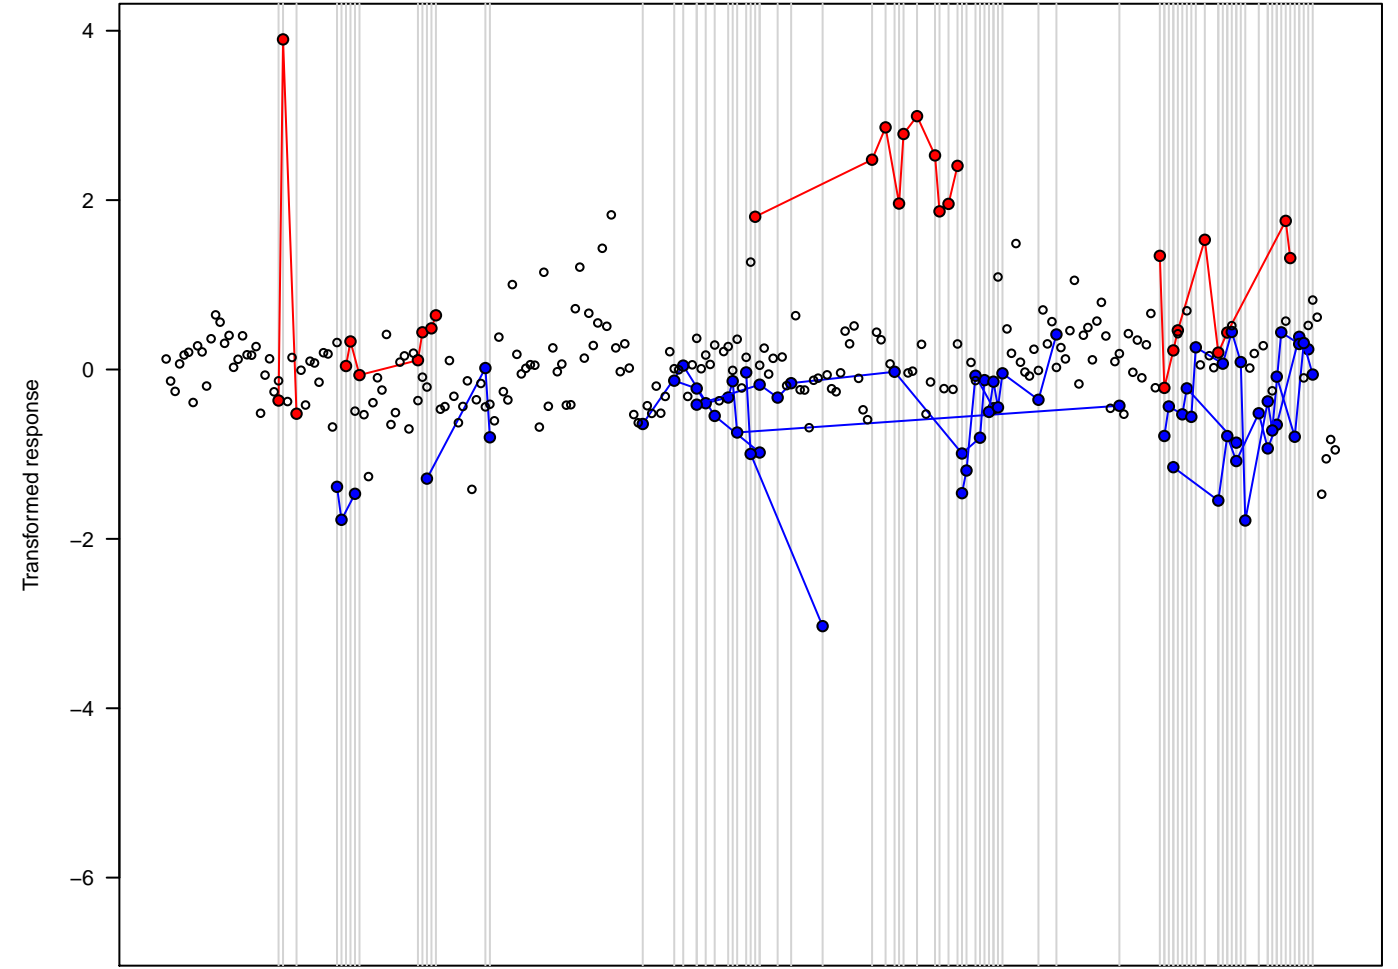

WTSI

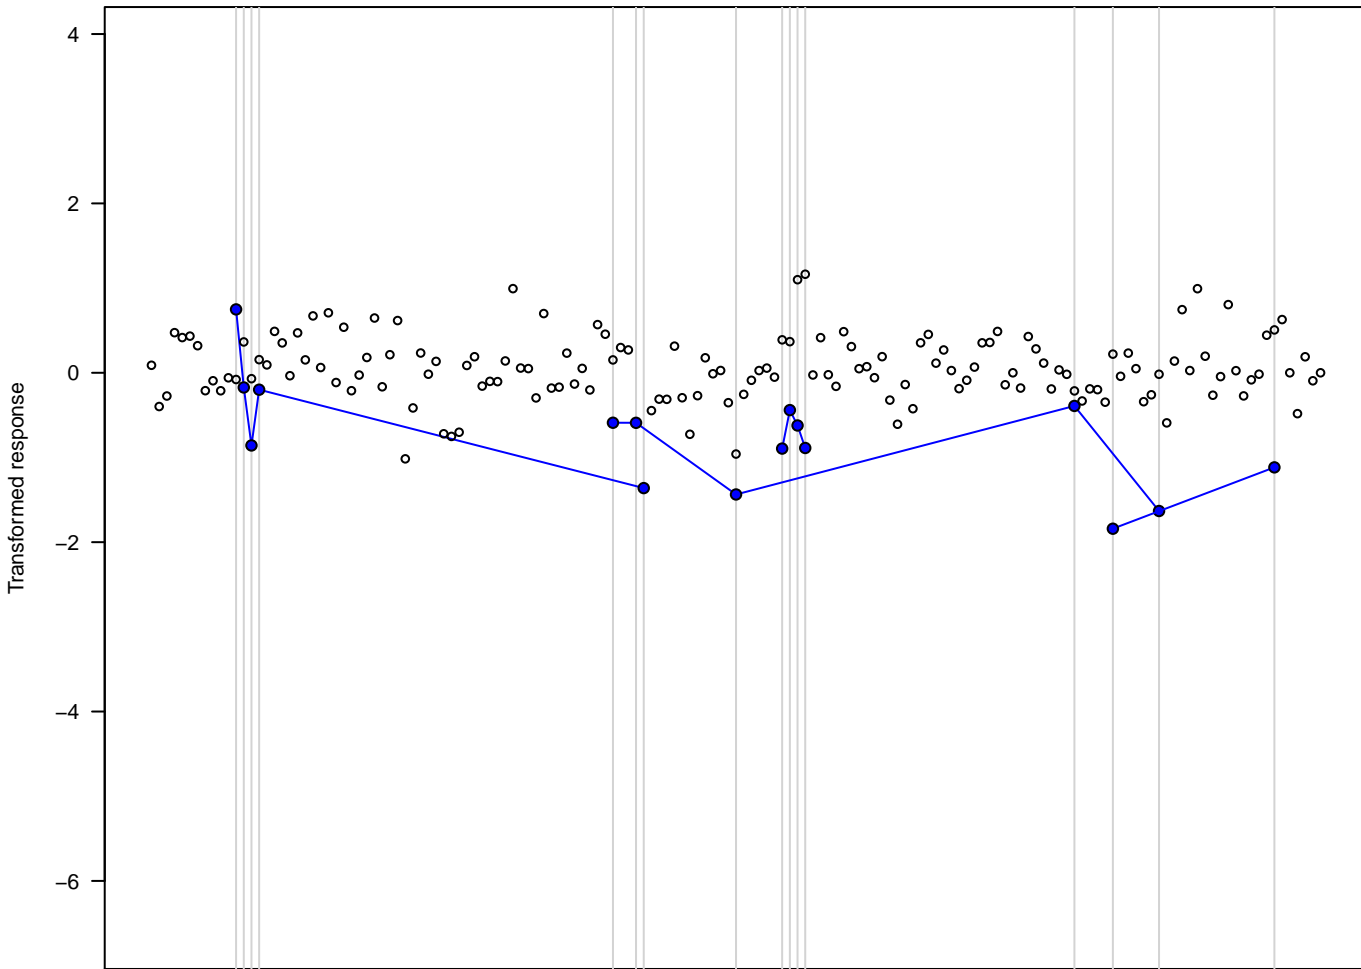

ICS

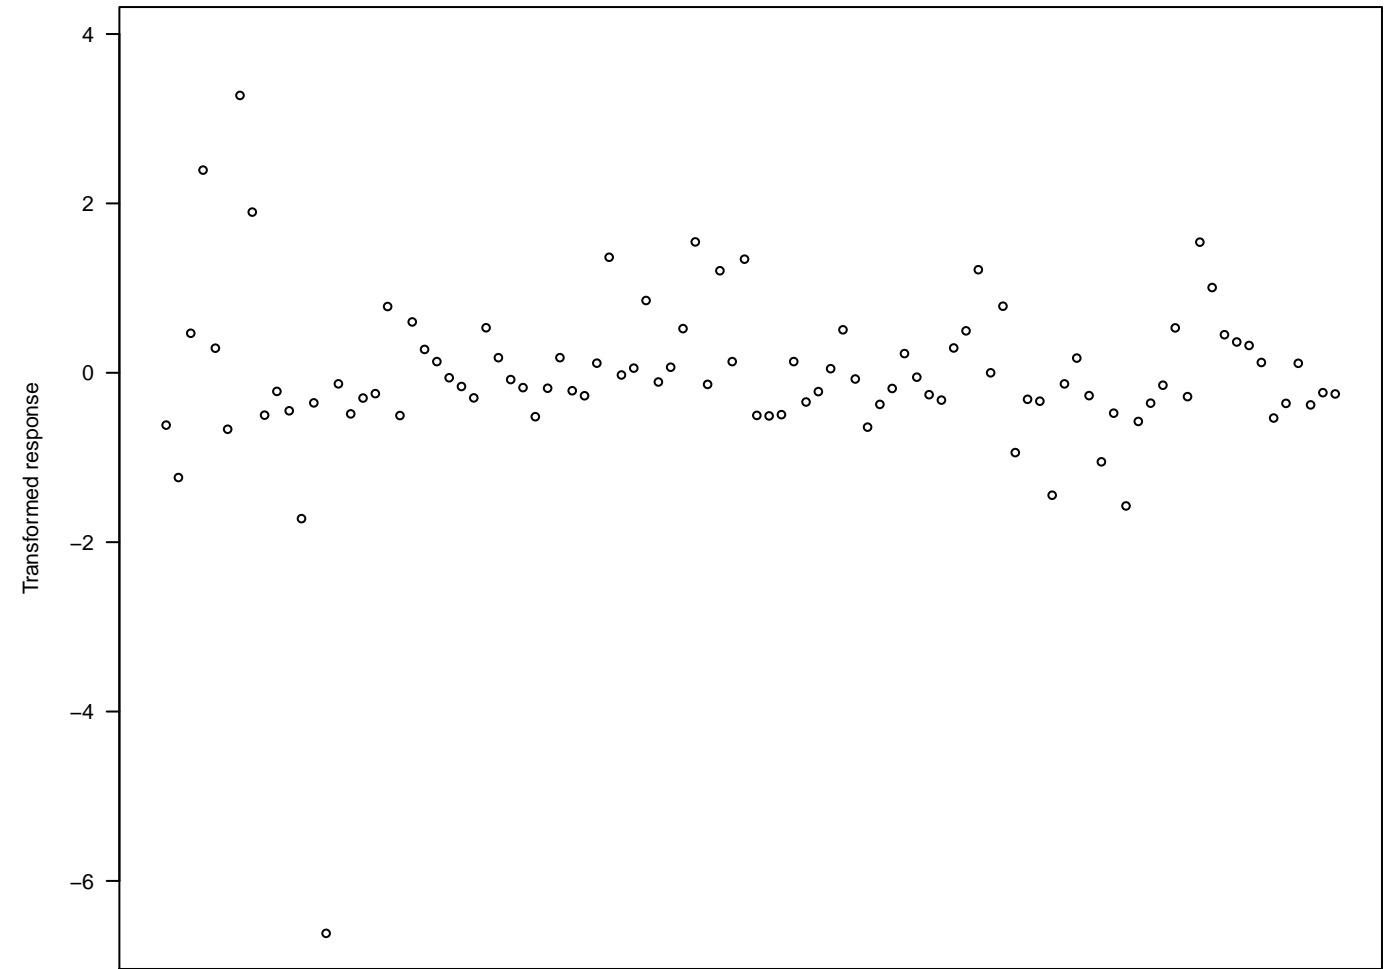



Start Dark Carbon dioxide production  
(Calorimetry)

HMGU

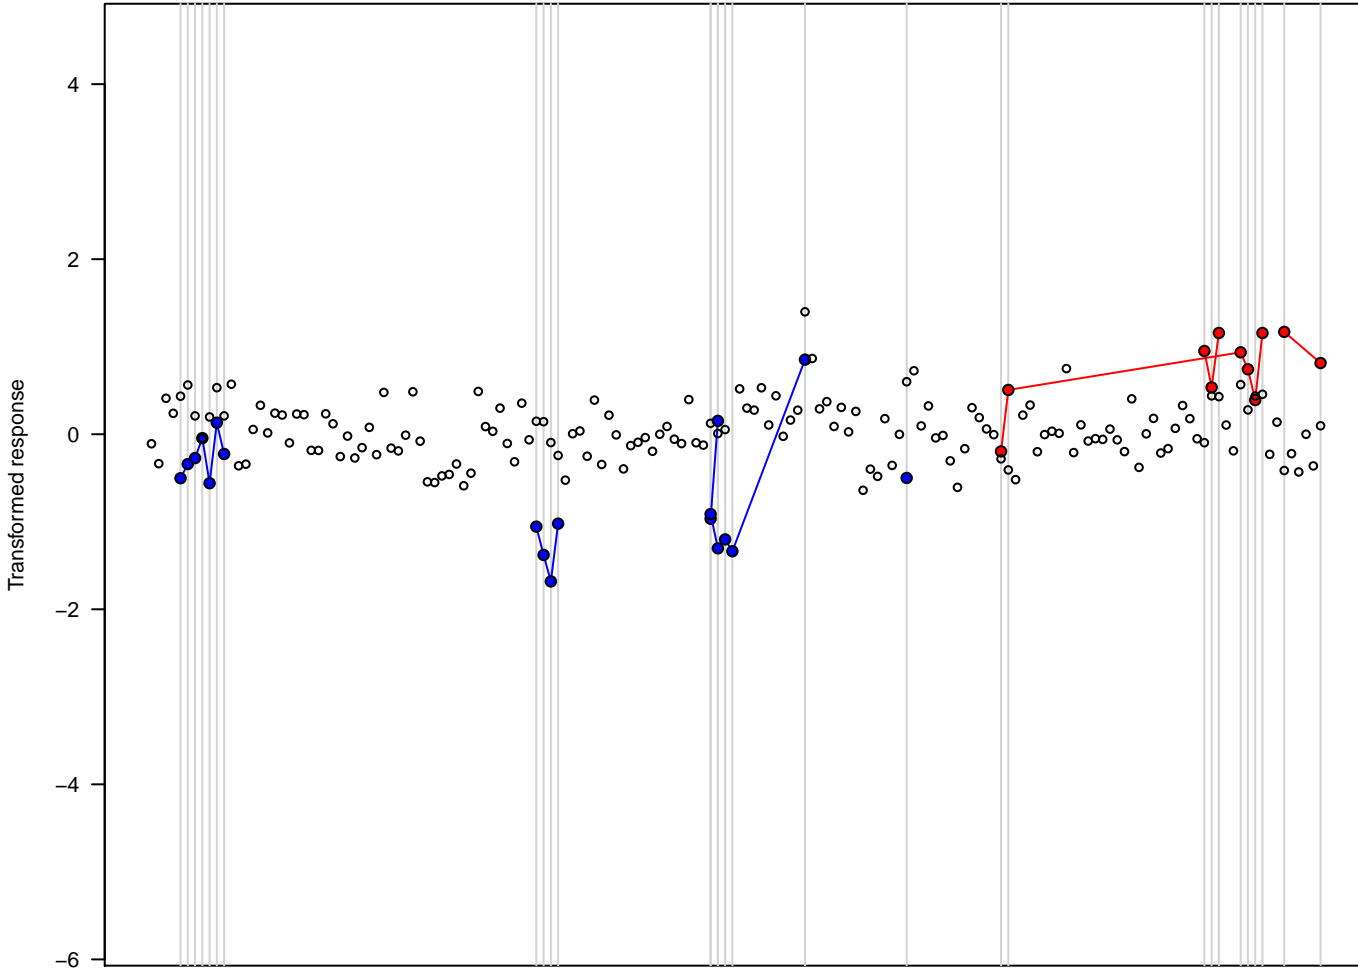

MRC Harwell

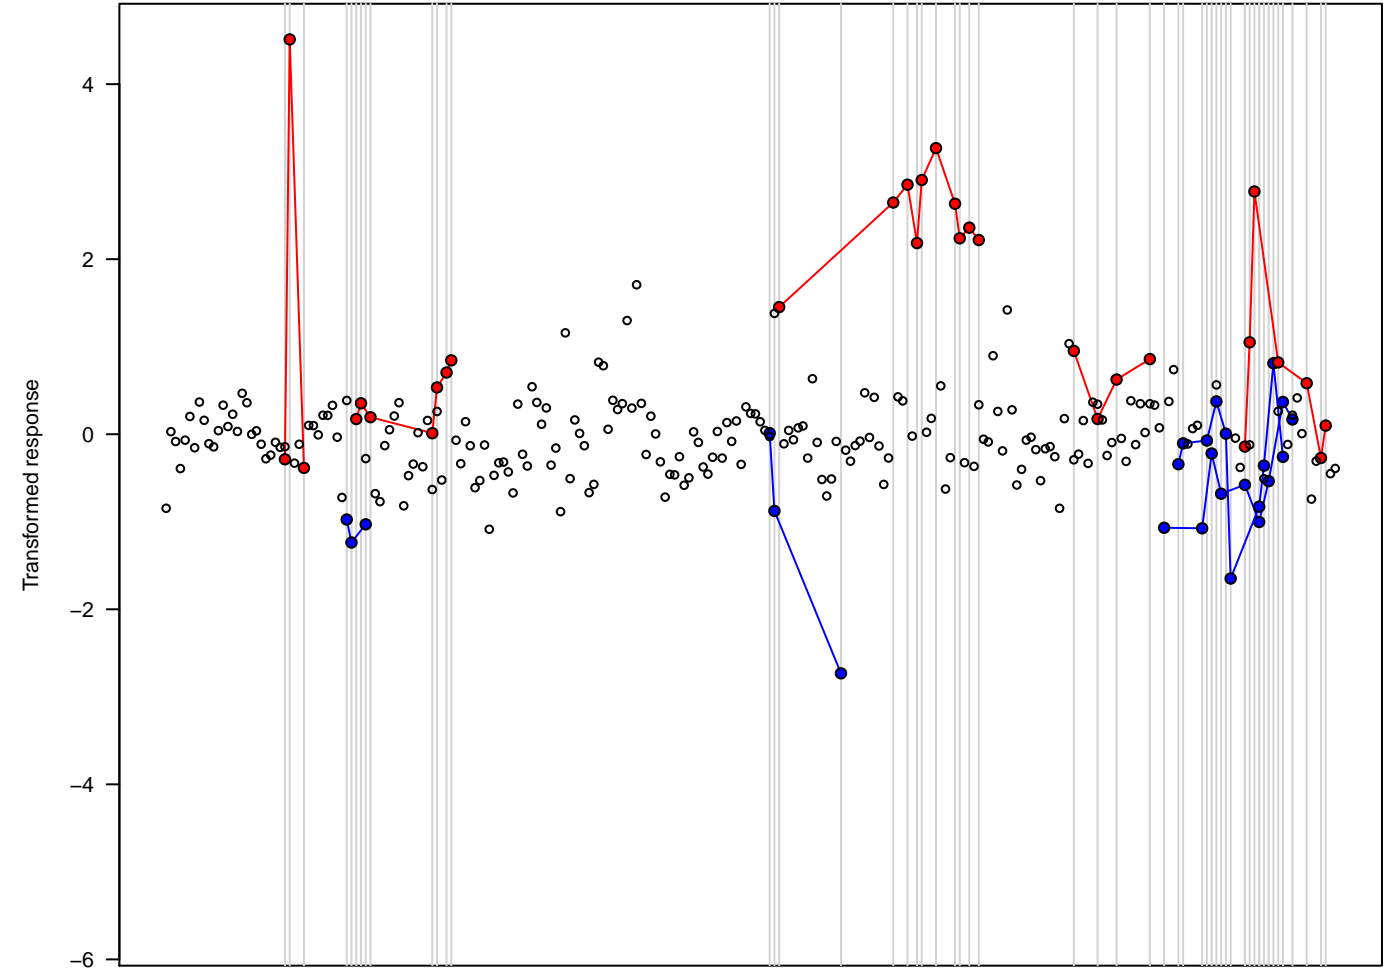

WTSI

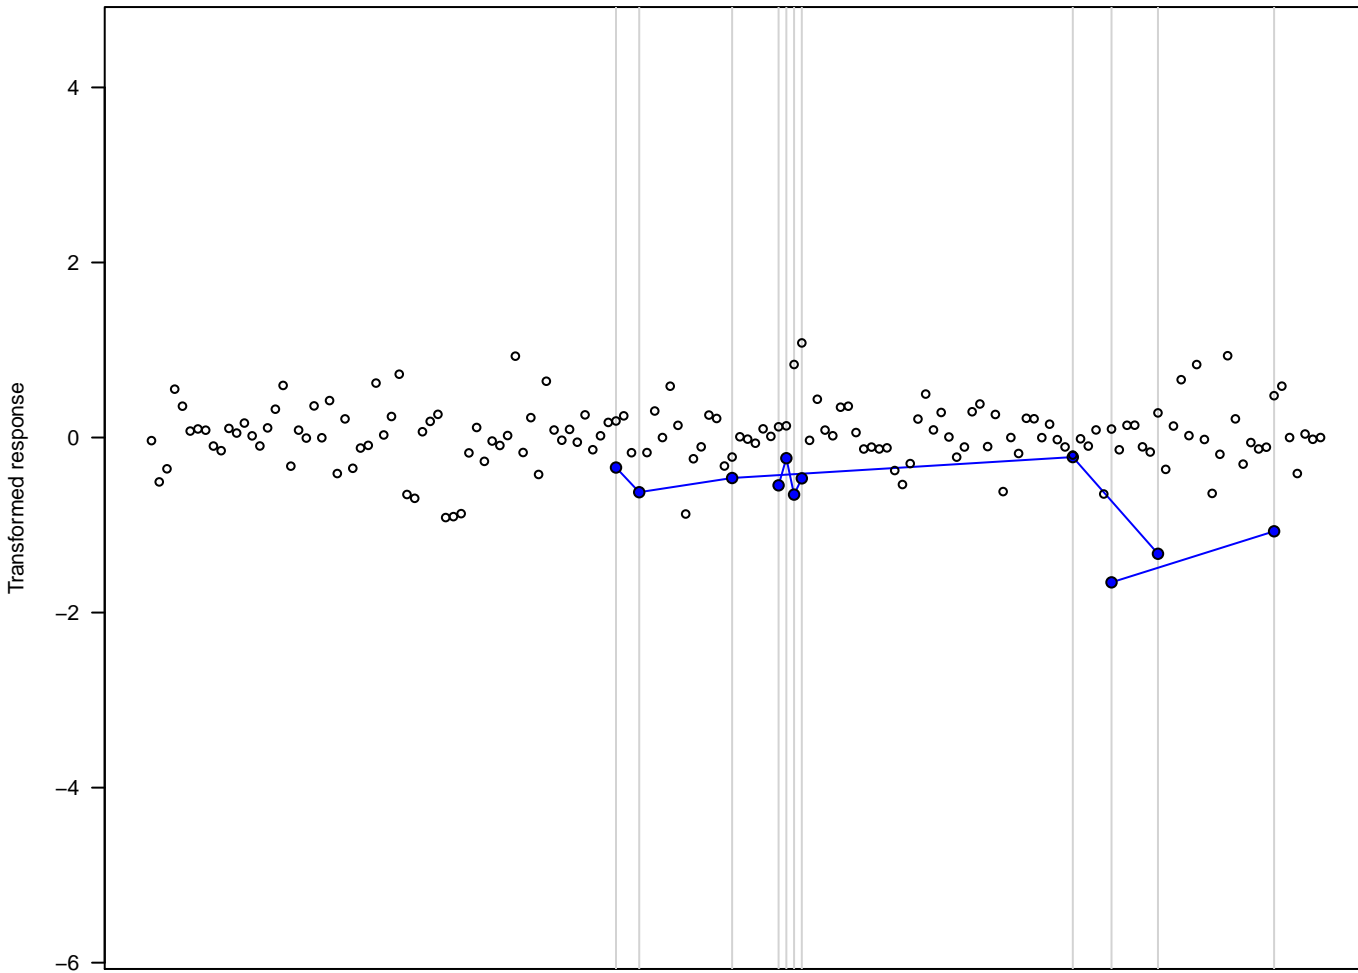

ICS

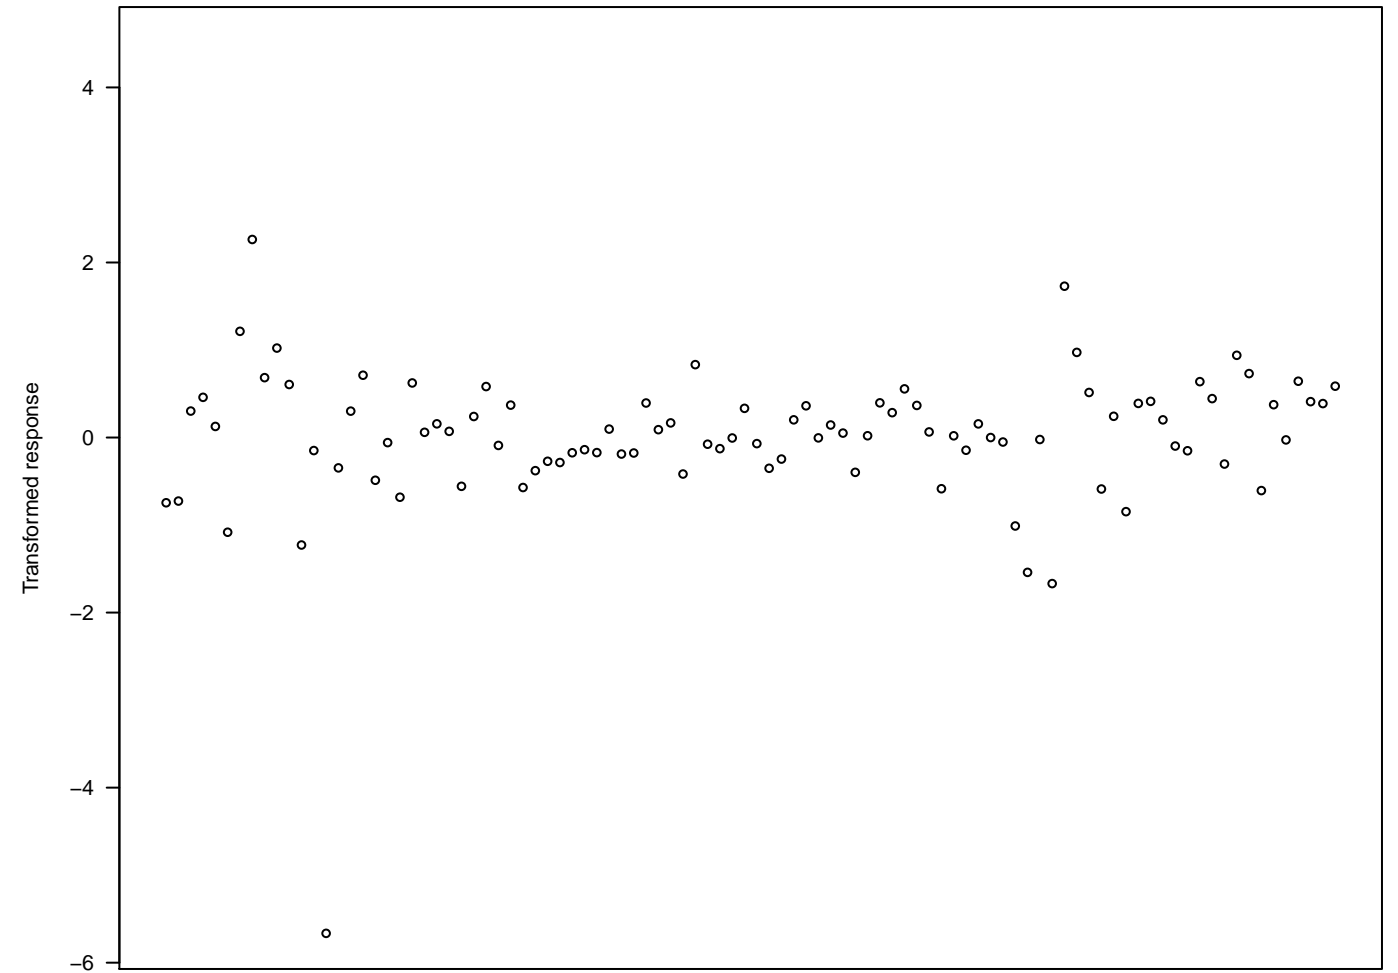

Start Dark Heat production  
(Calorimetry)

HMGU

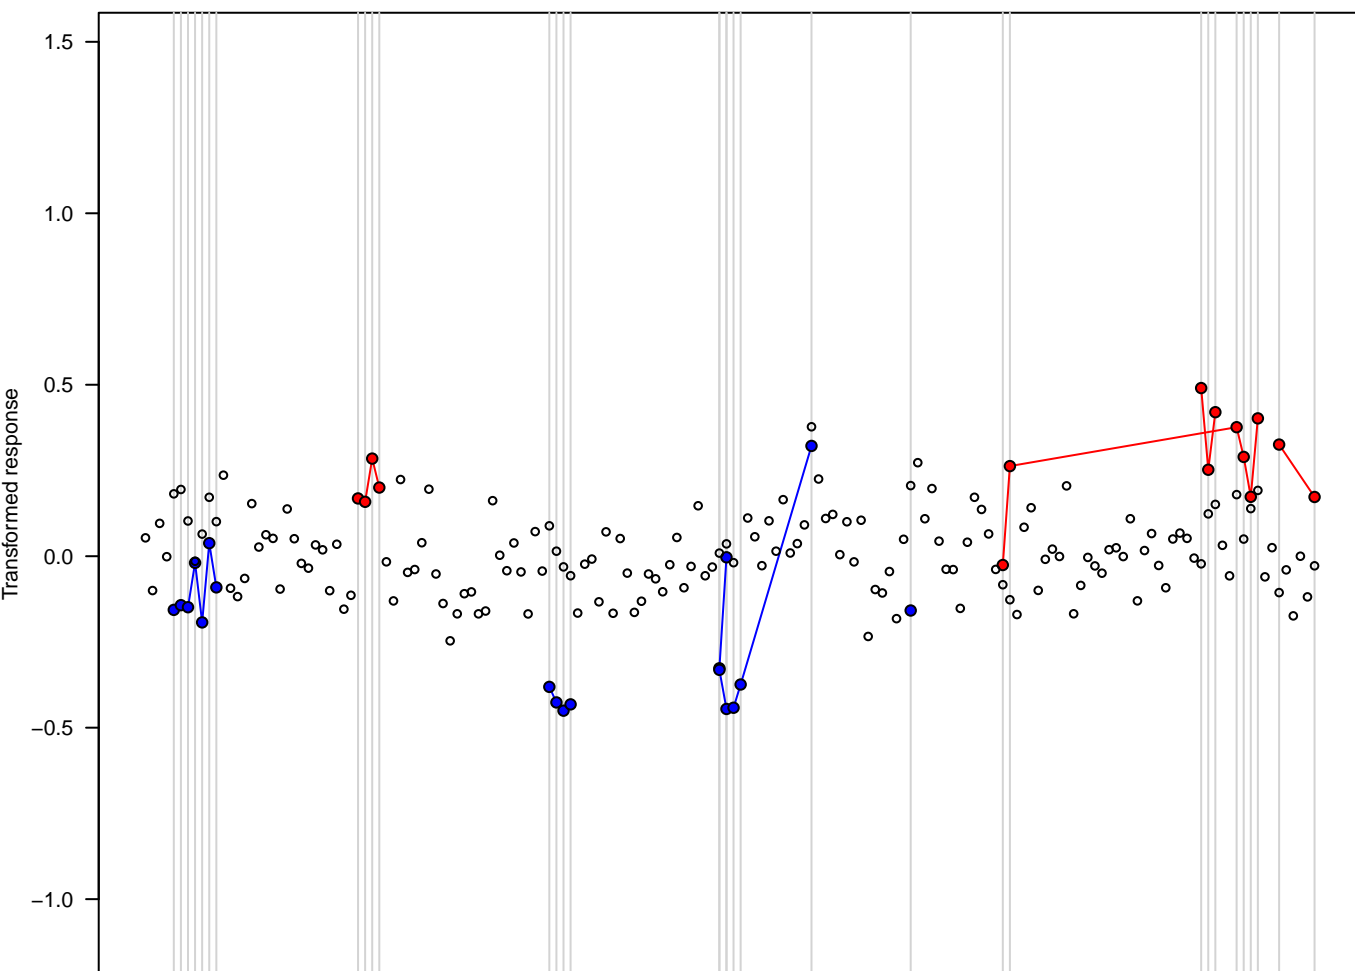

MRC Harwell

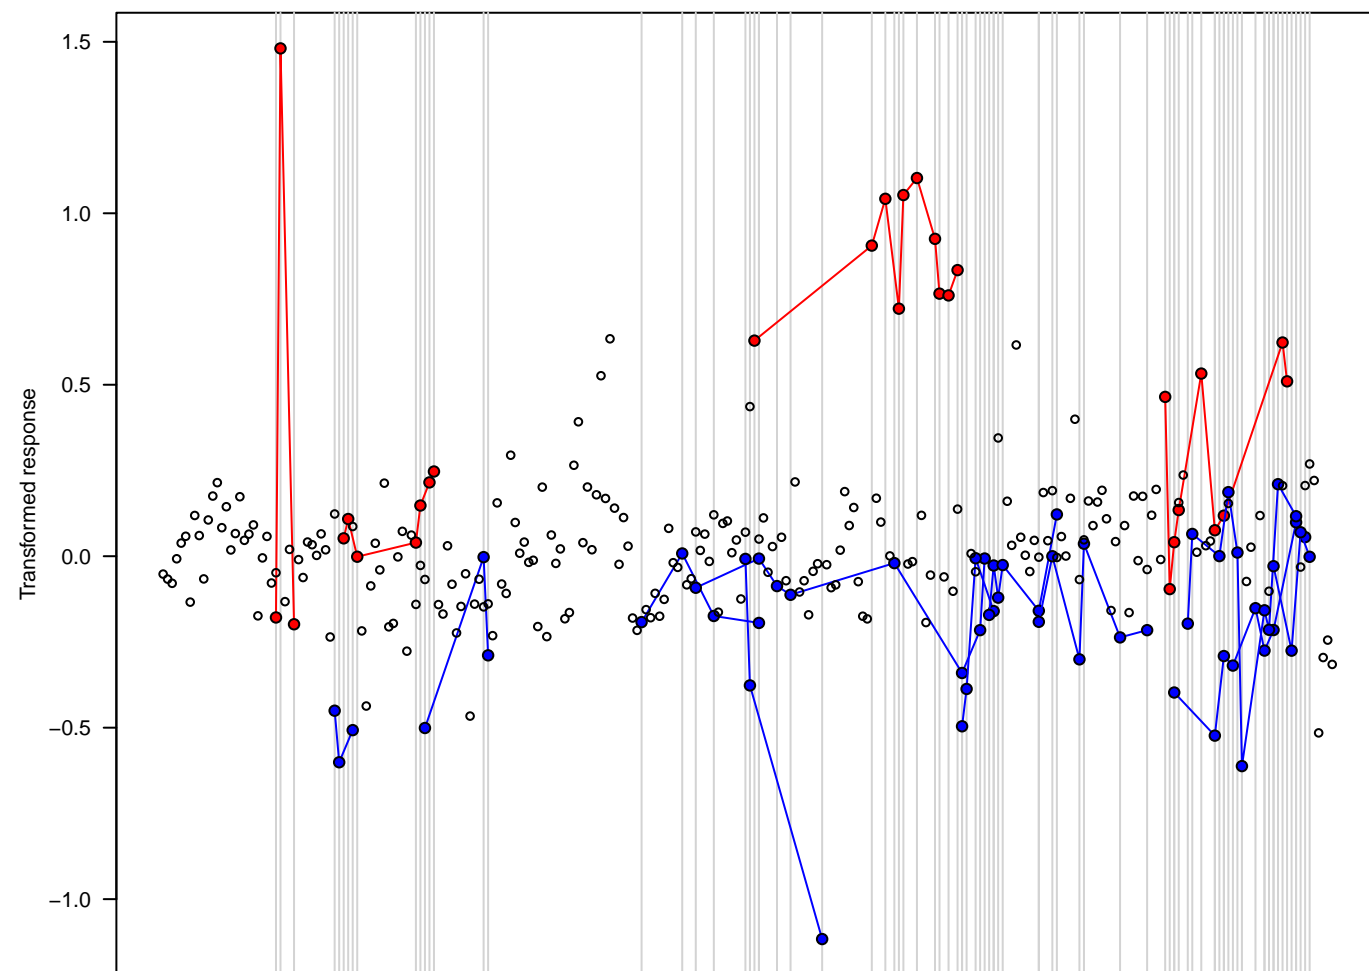

WTSI

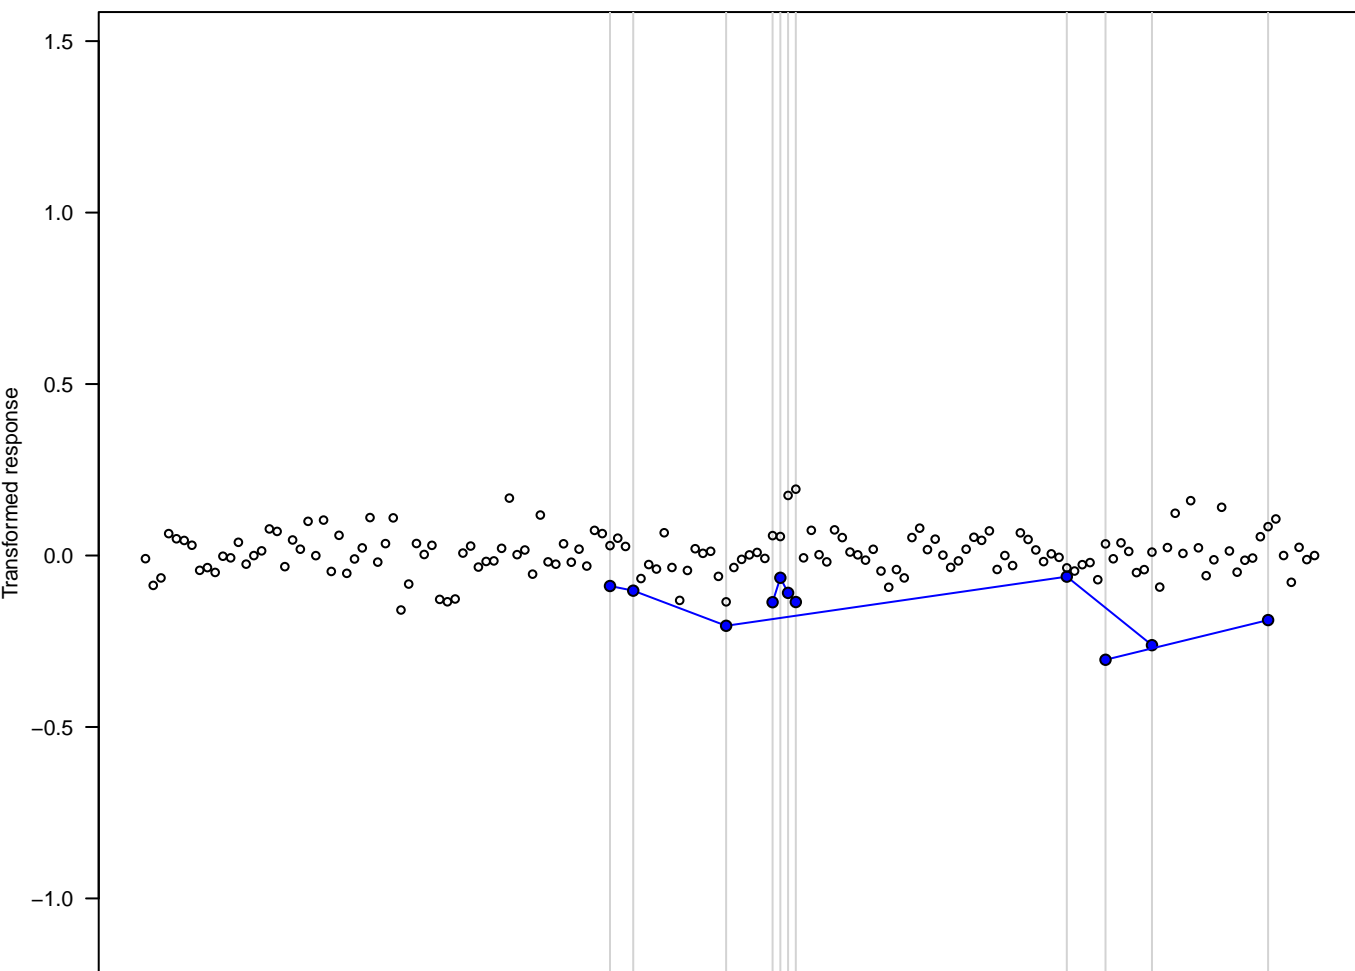

ICS

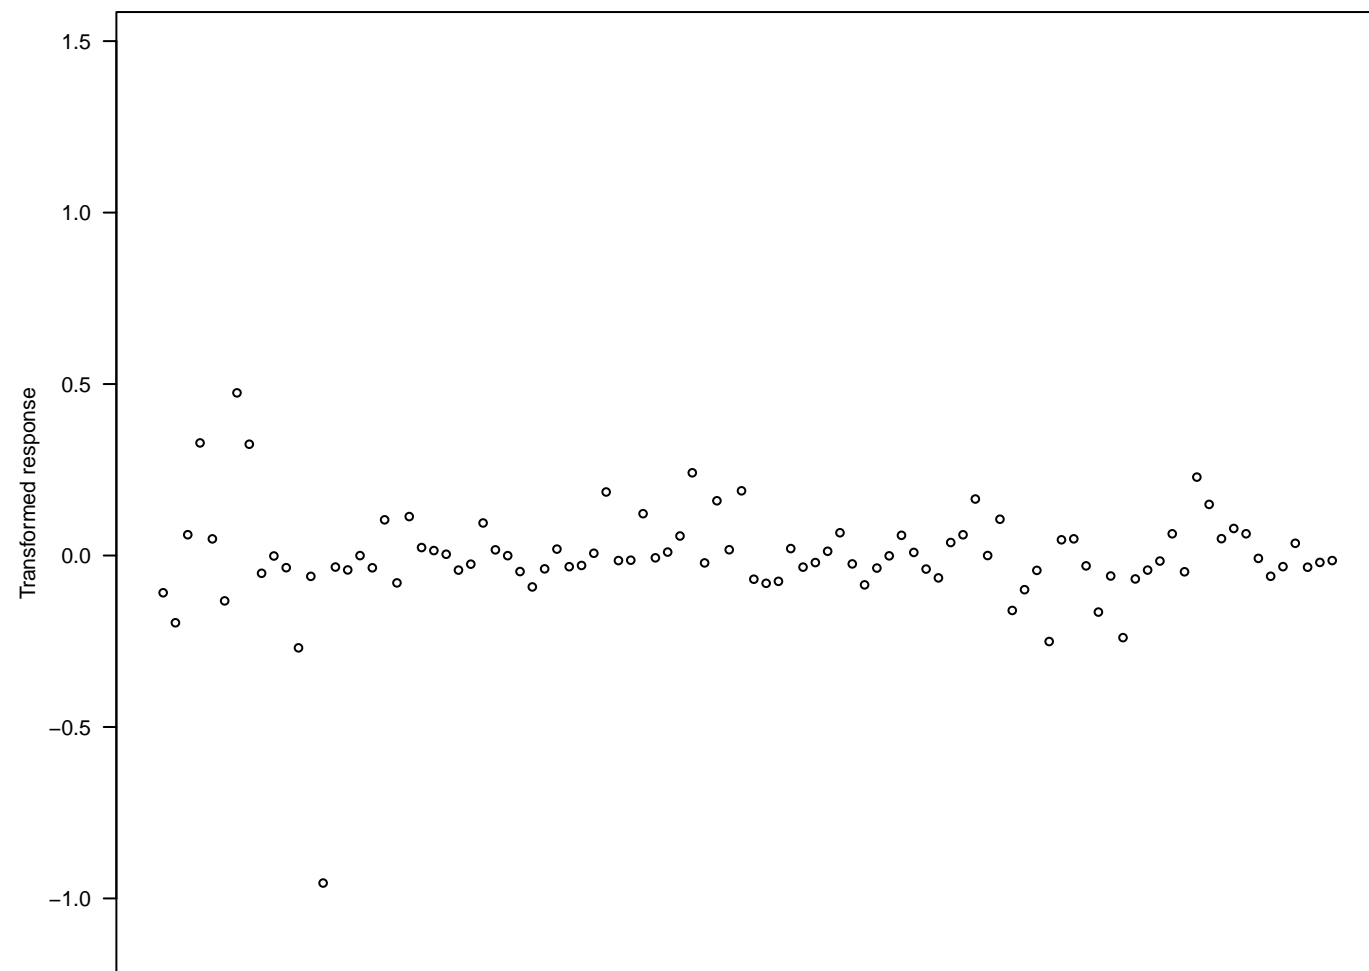

Start Dark Ambulatory activity  
(Calorimetry)

HMGU

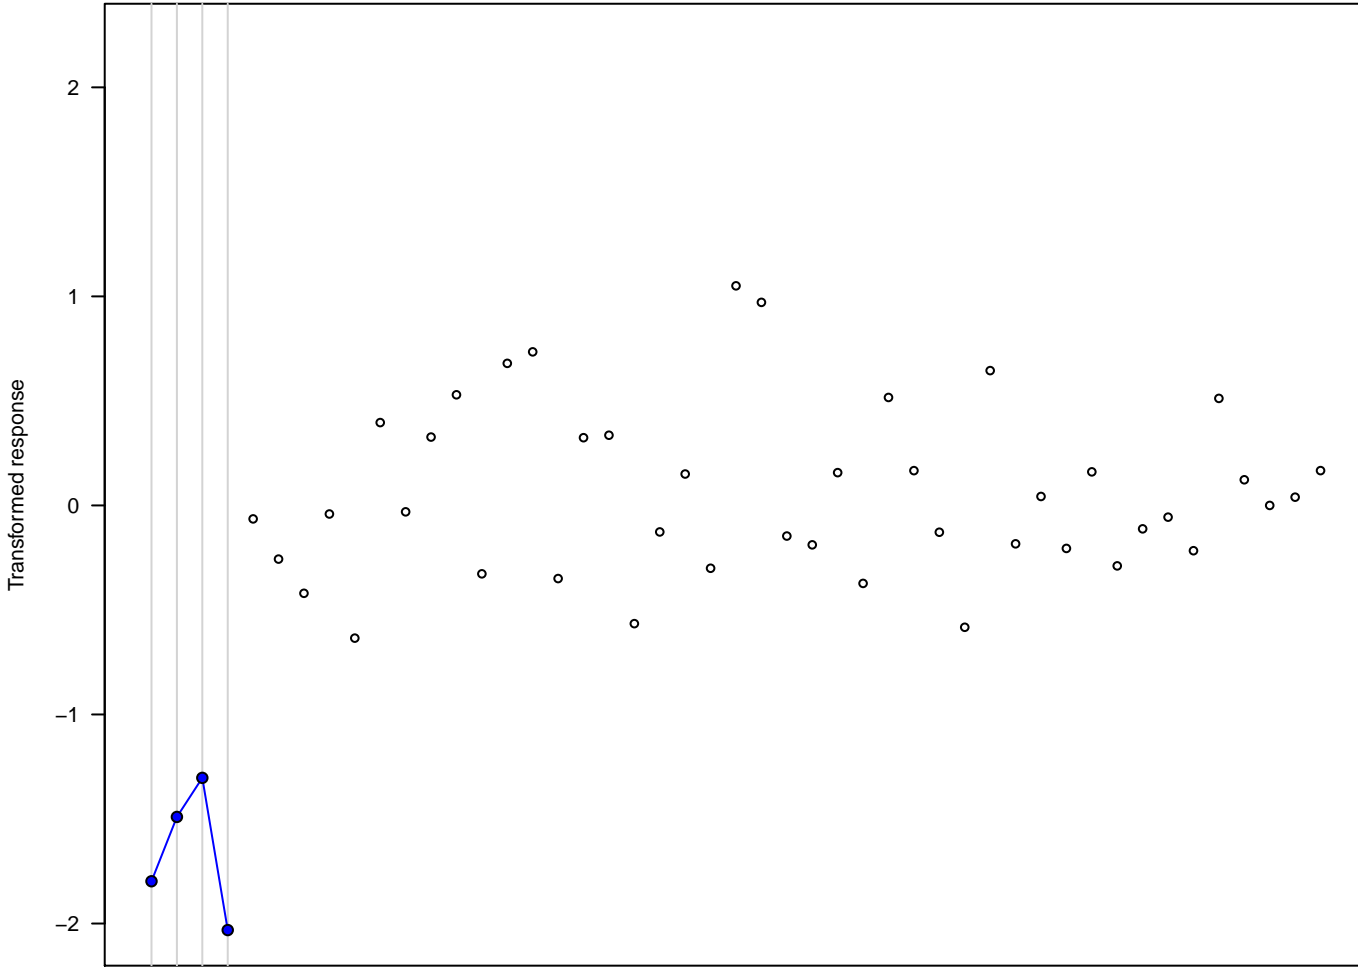

MRC Harwell

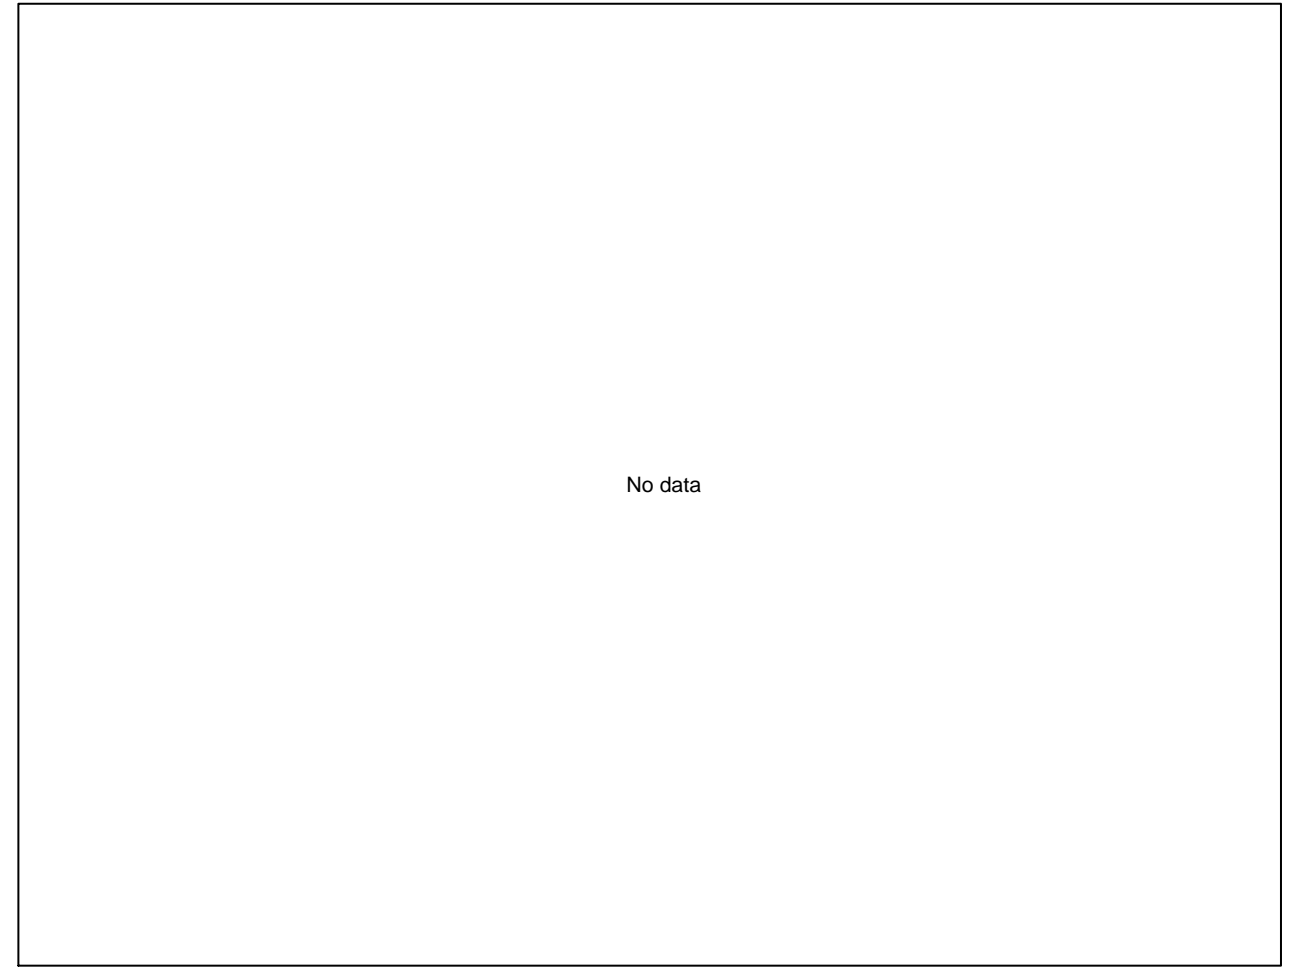

WTSI

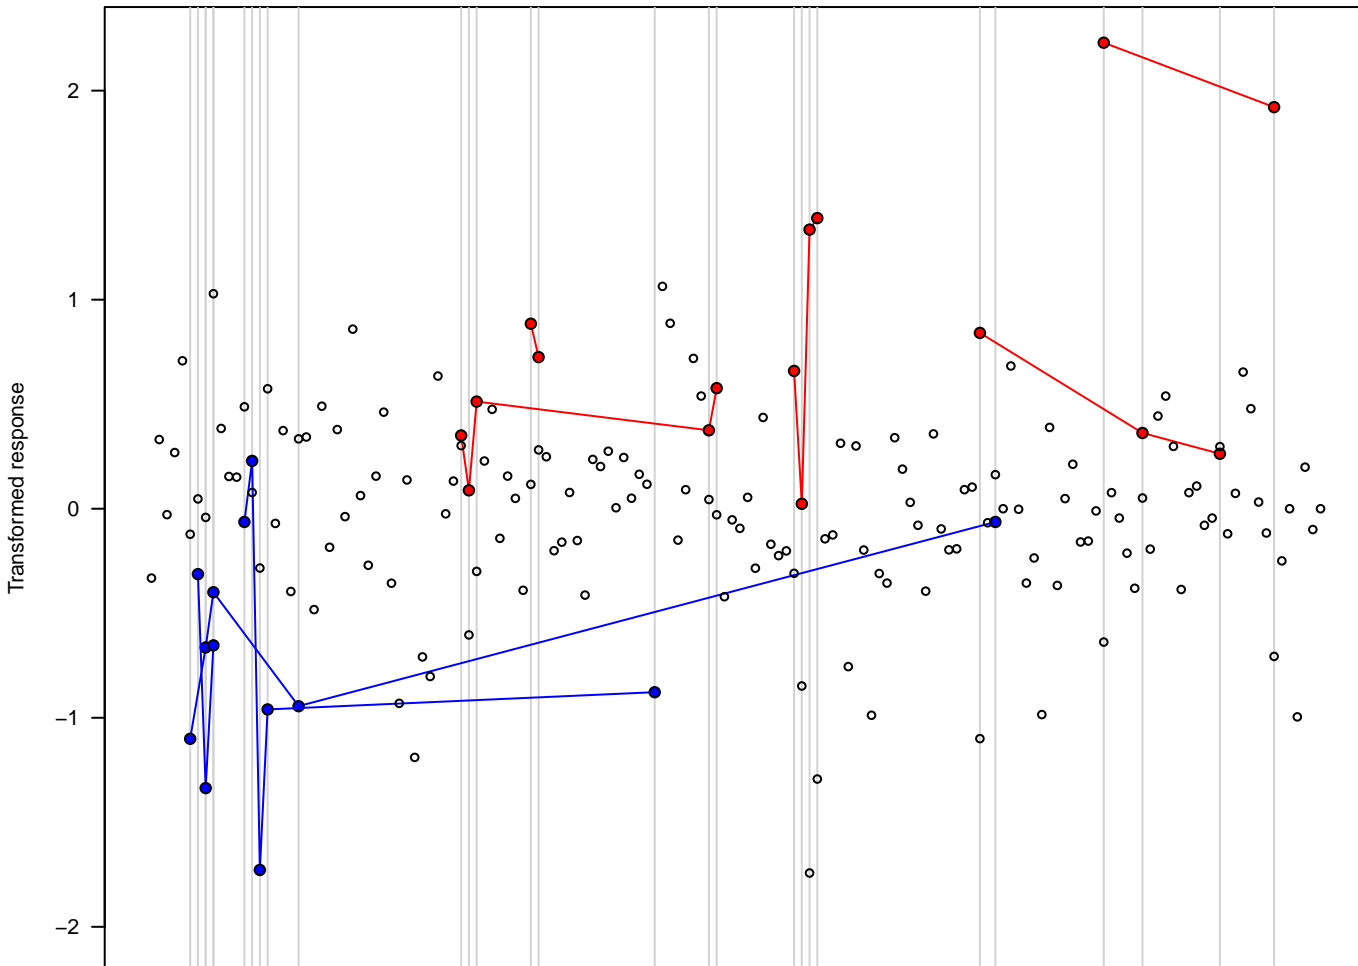

ICS

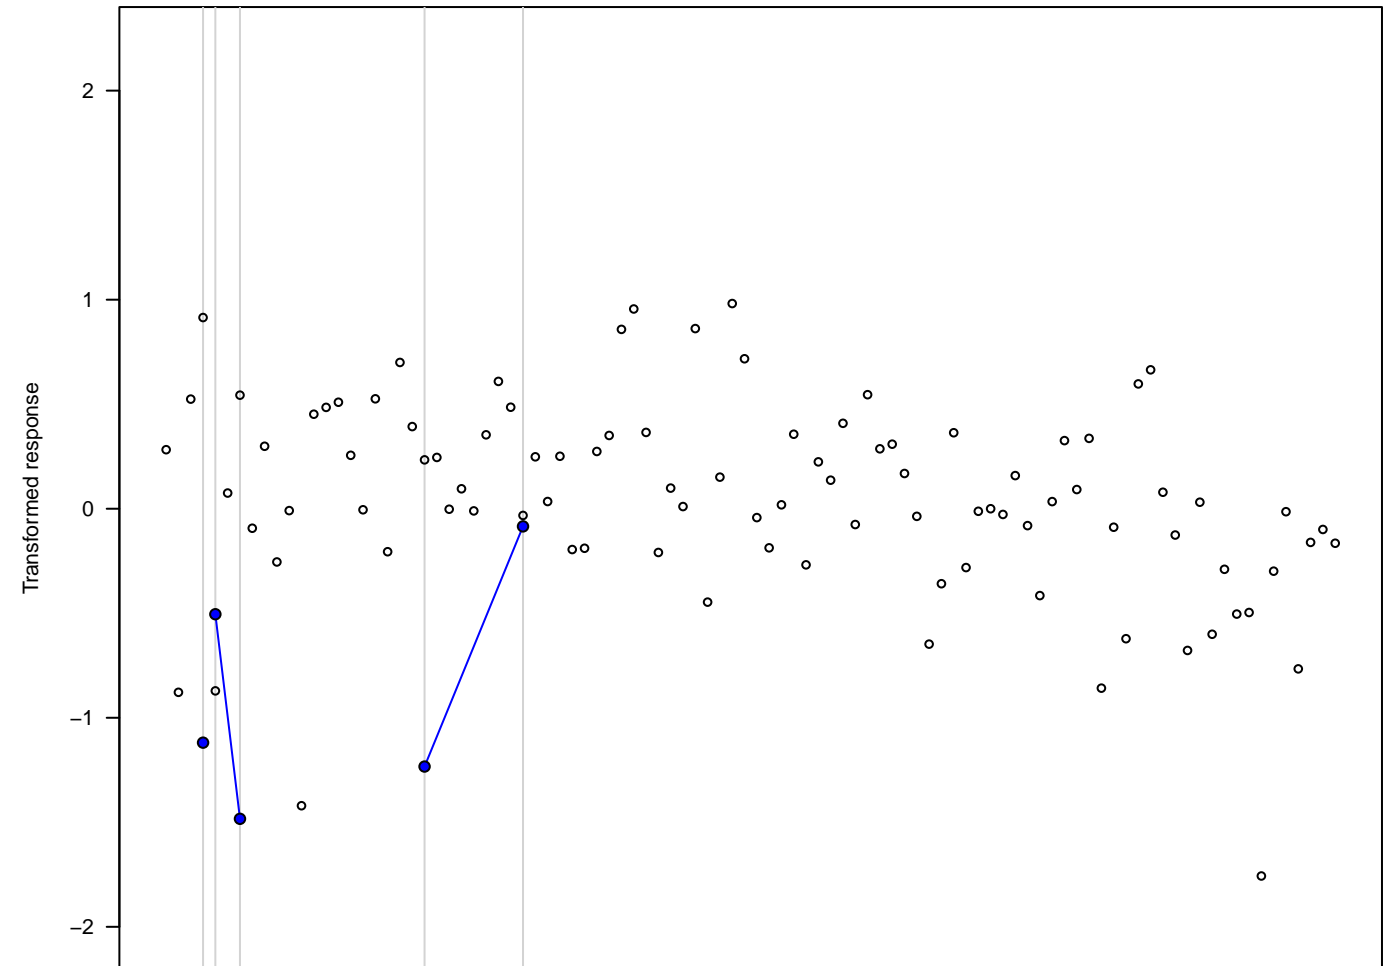

Start Dark Total activity  
(Calorimetry)

HMGU

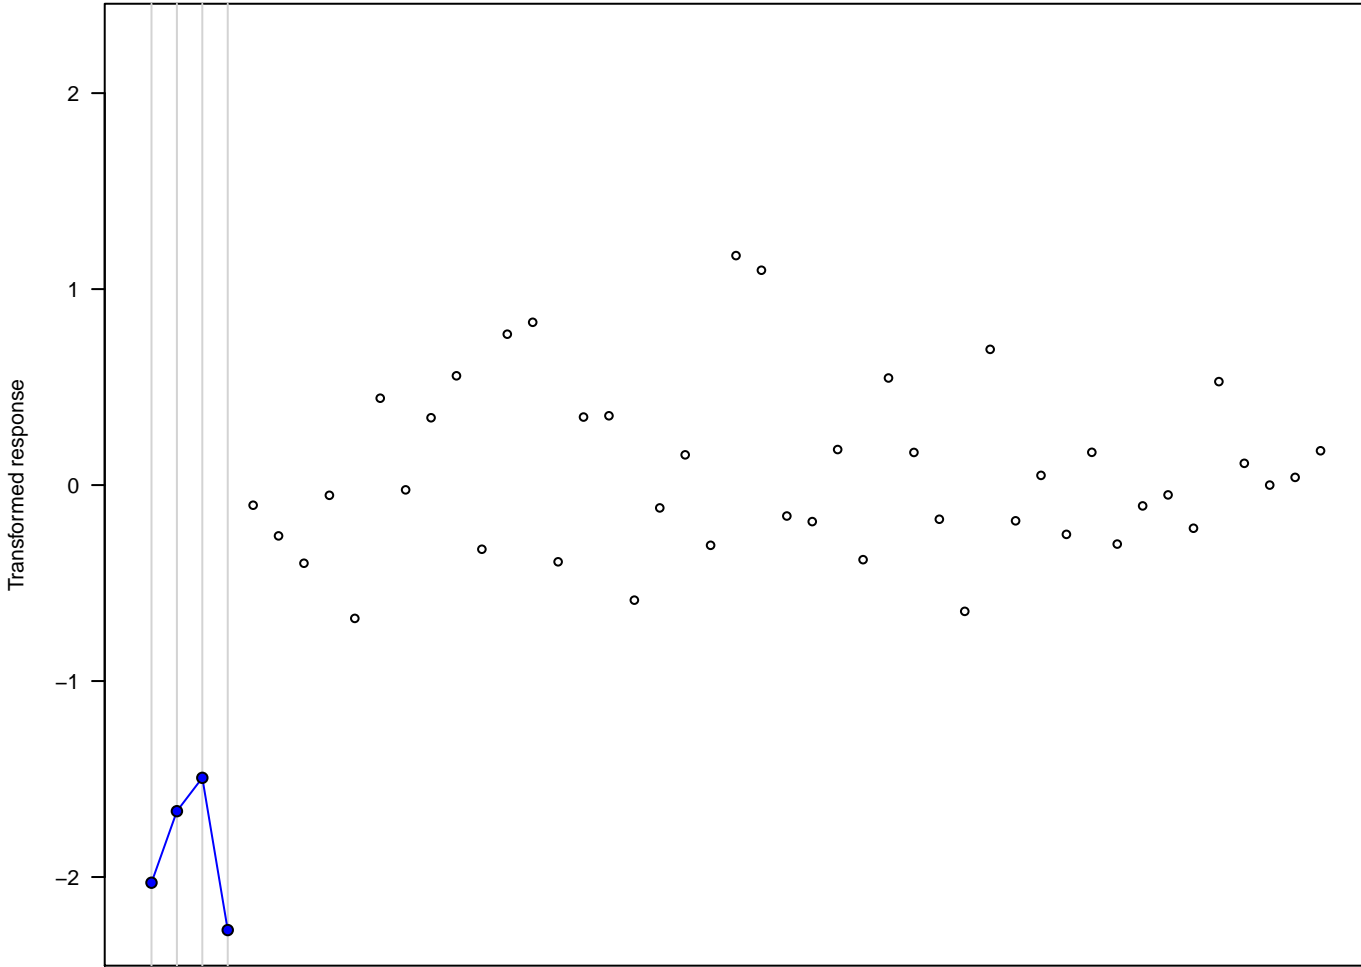

MRC Harwell



WTSI

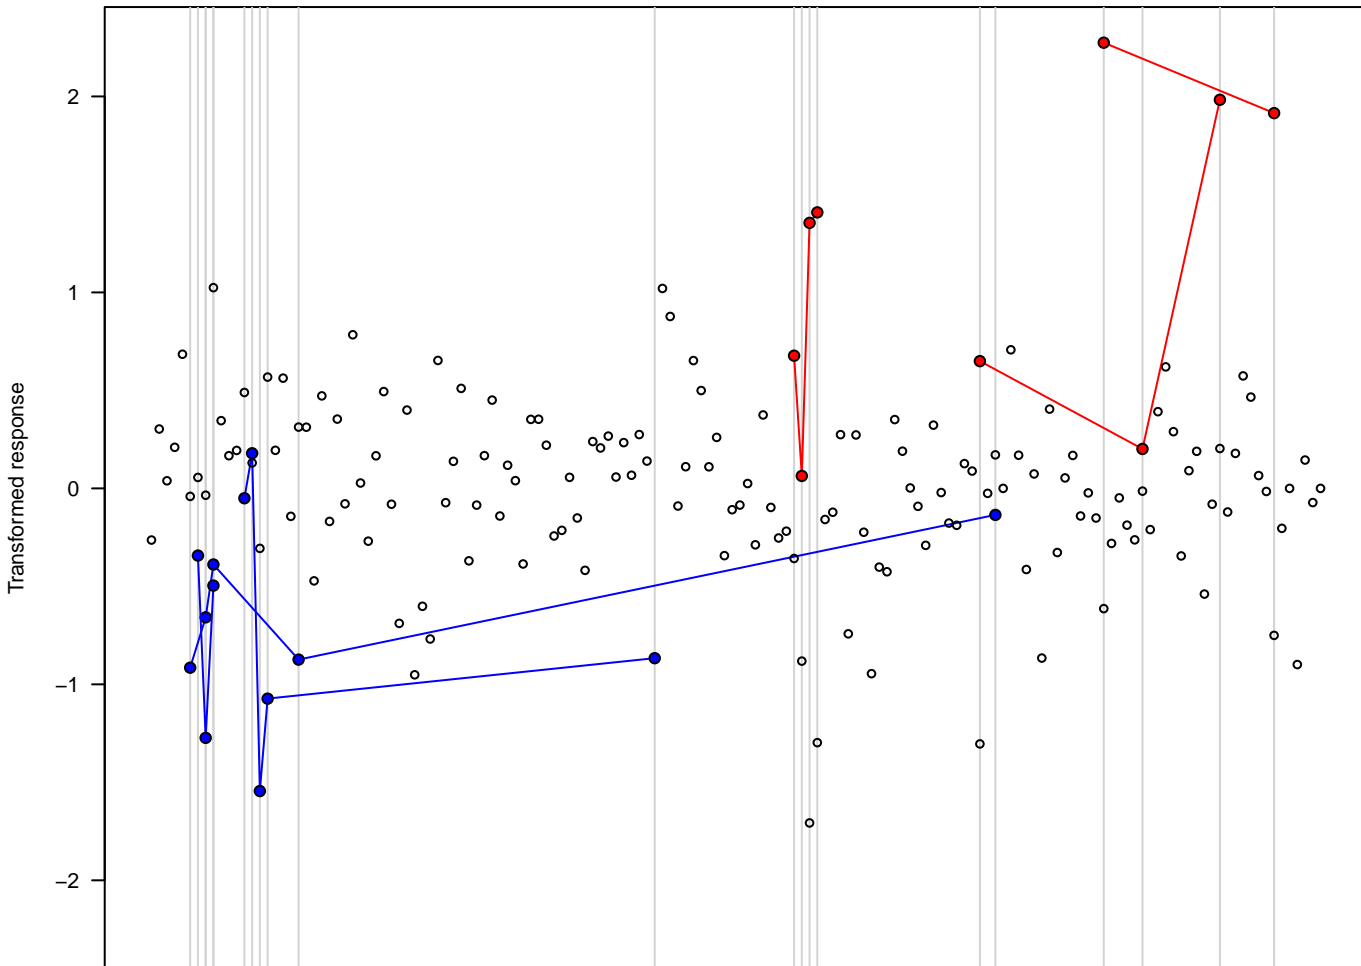

ICS

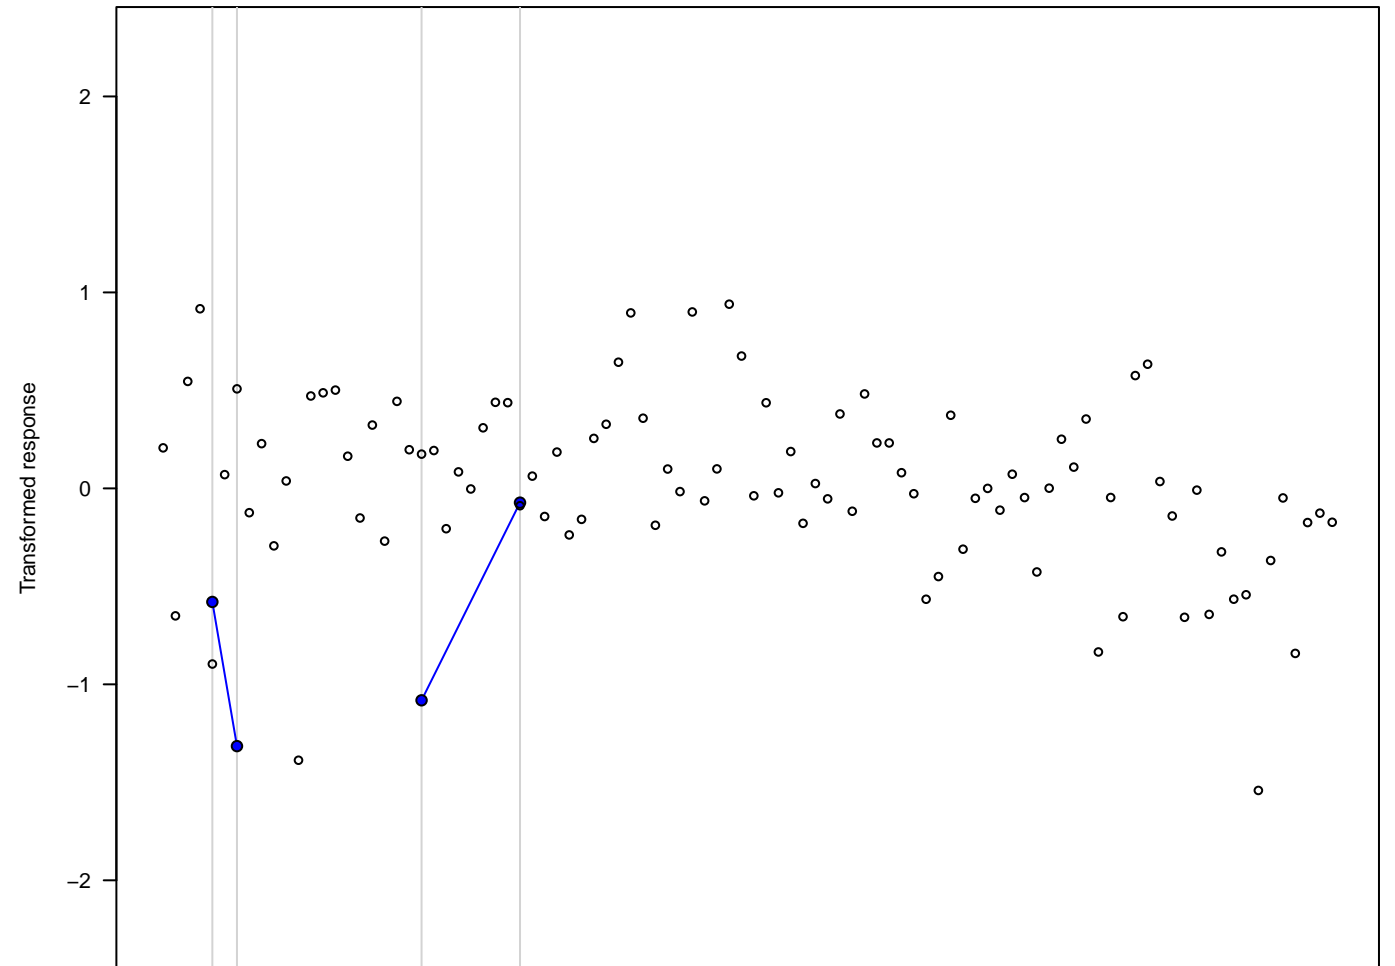

# Glucose response AUC (Simplified IPGTT)

## HMGU

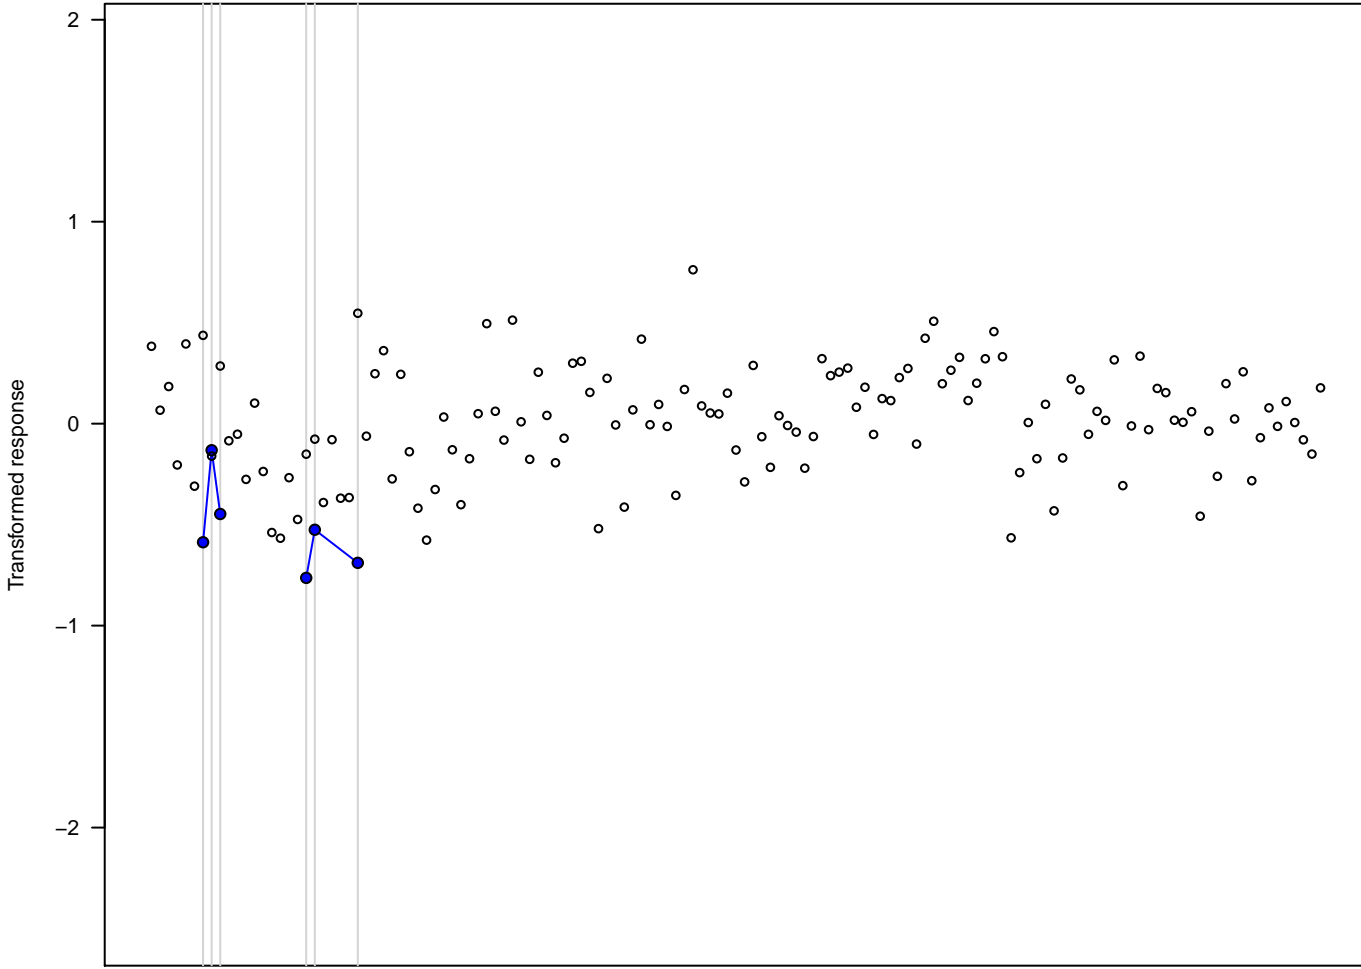

## MRC Harwell

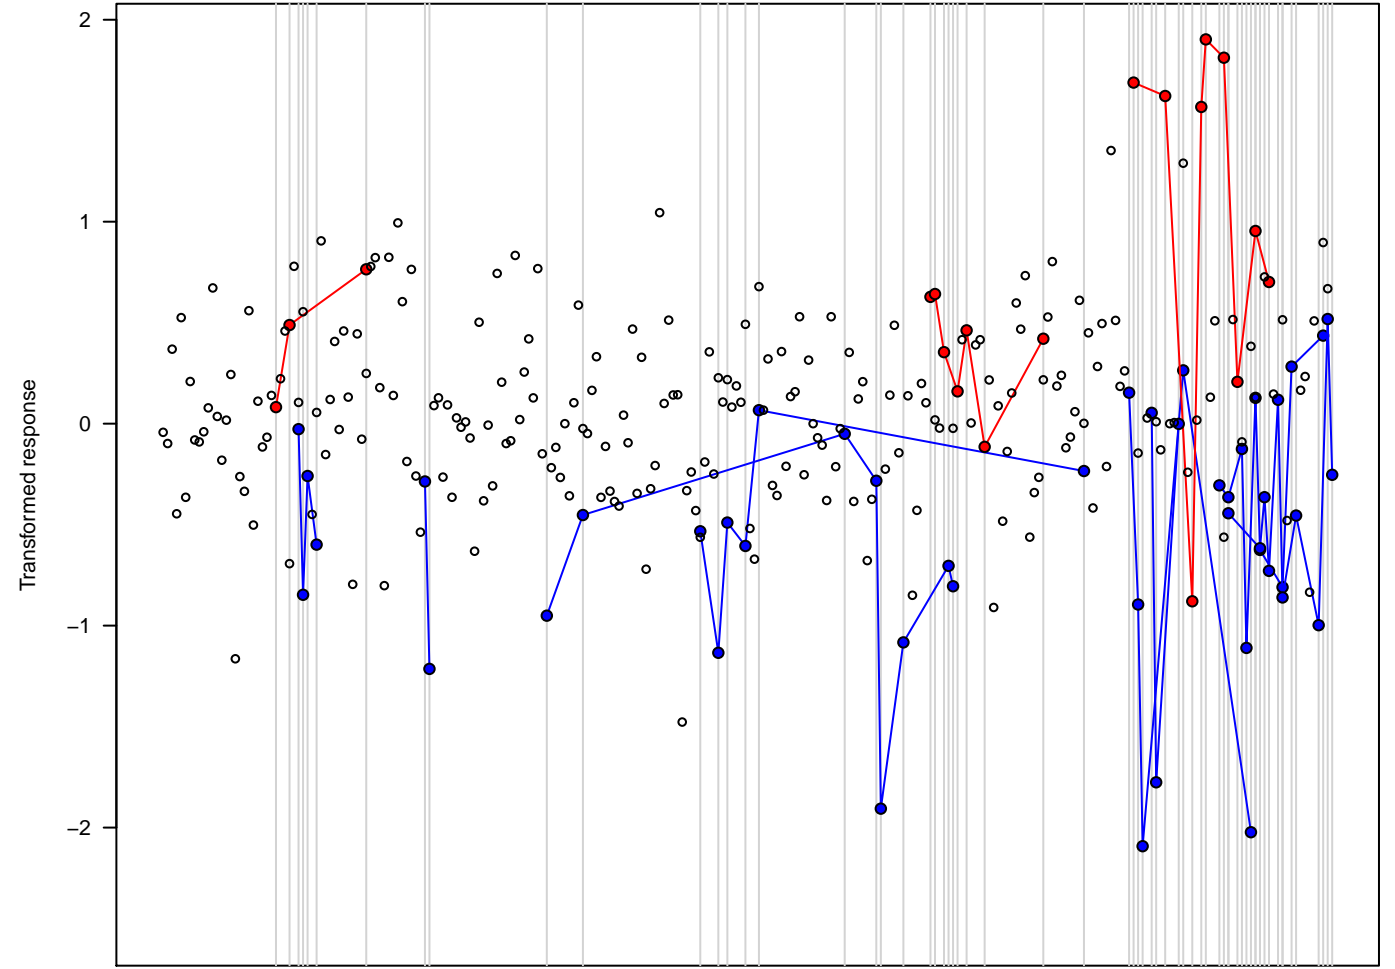

## WTSI

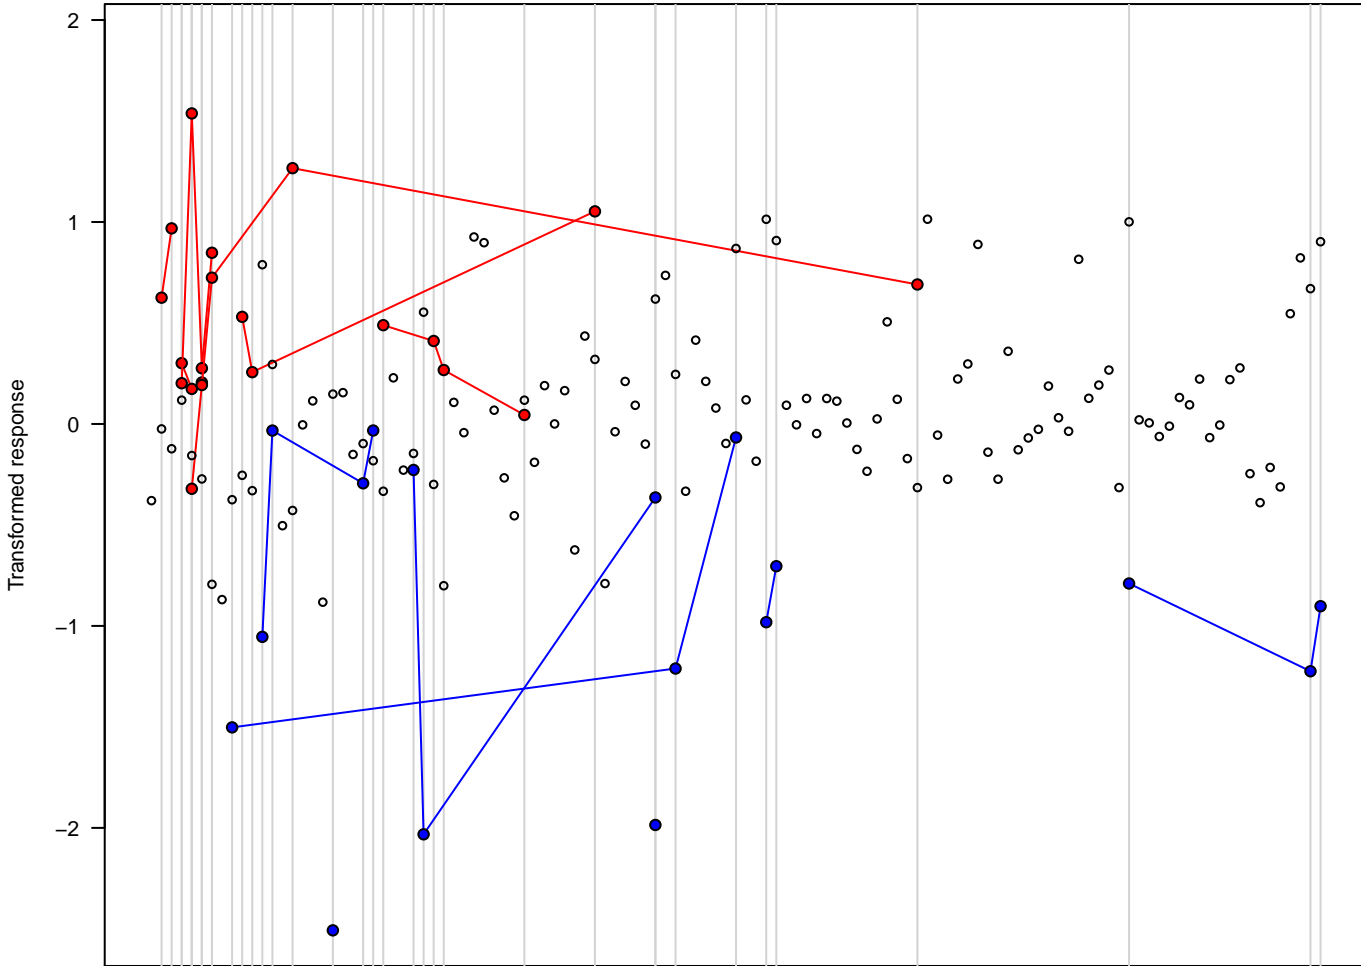

## ICS

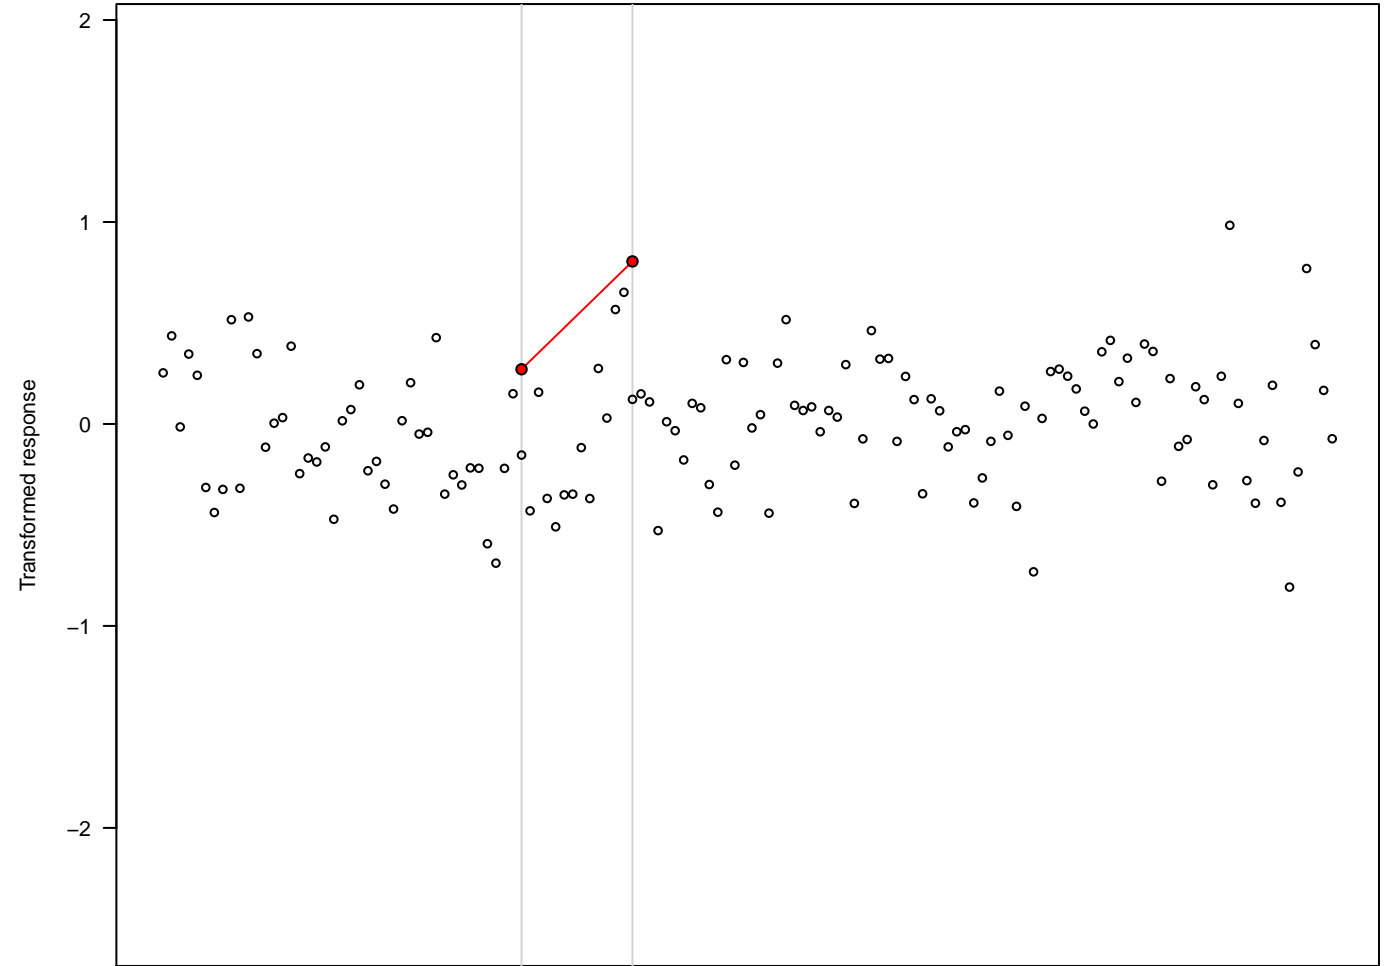

Fat mass  
(DEXA)

HMGU

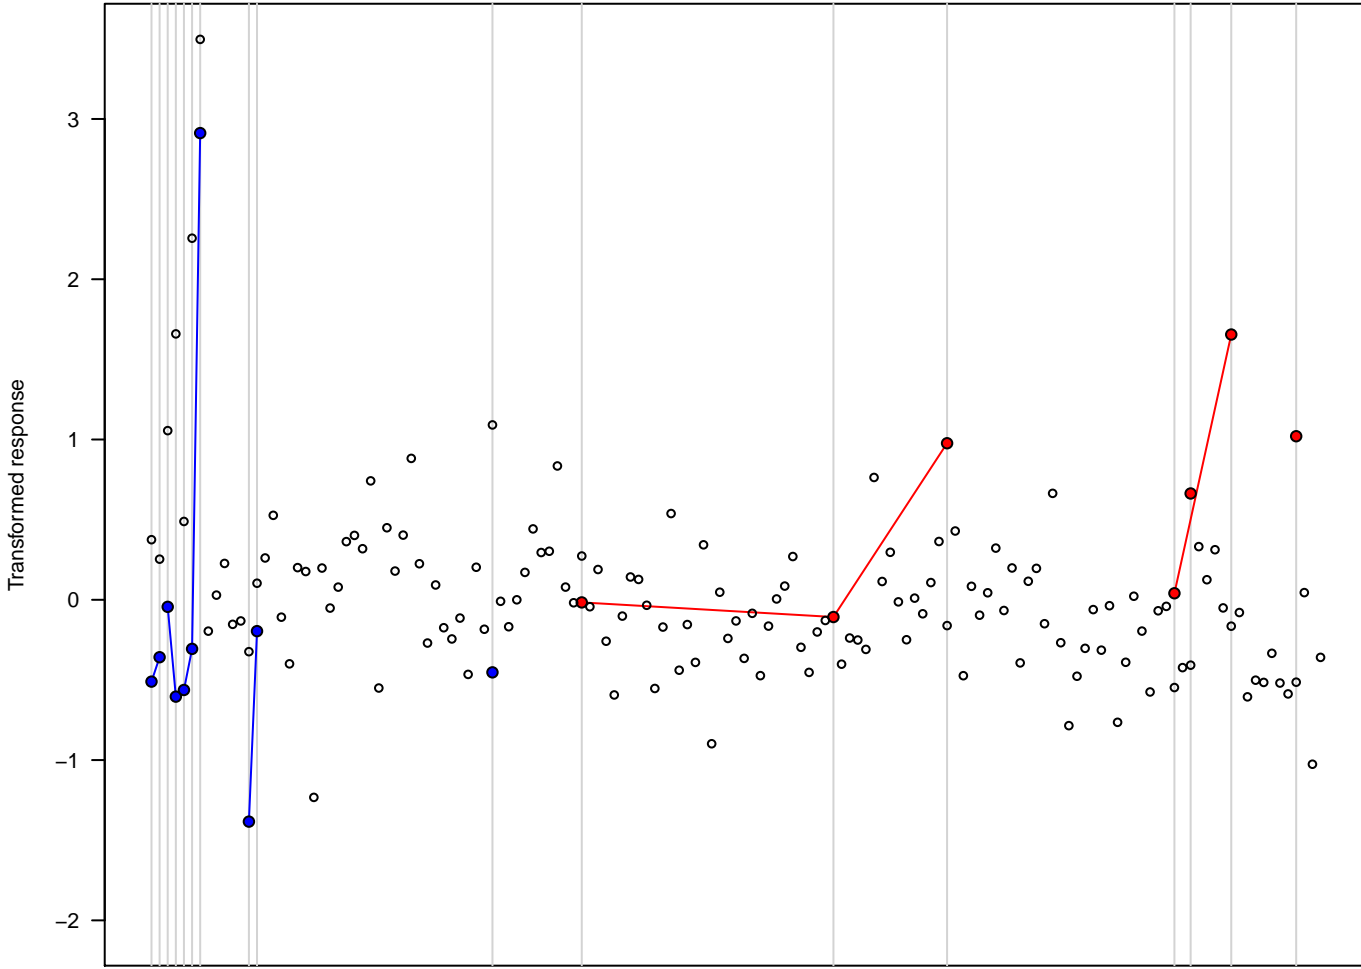

MRC Harwell

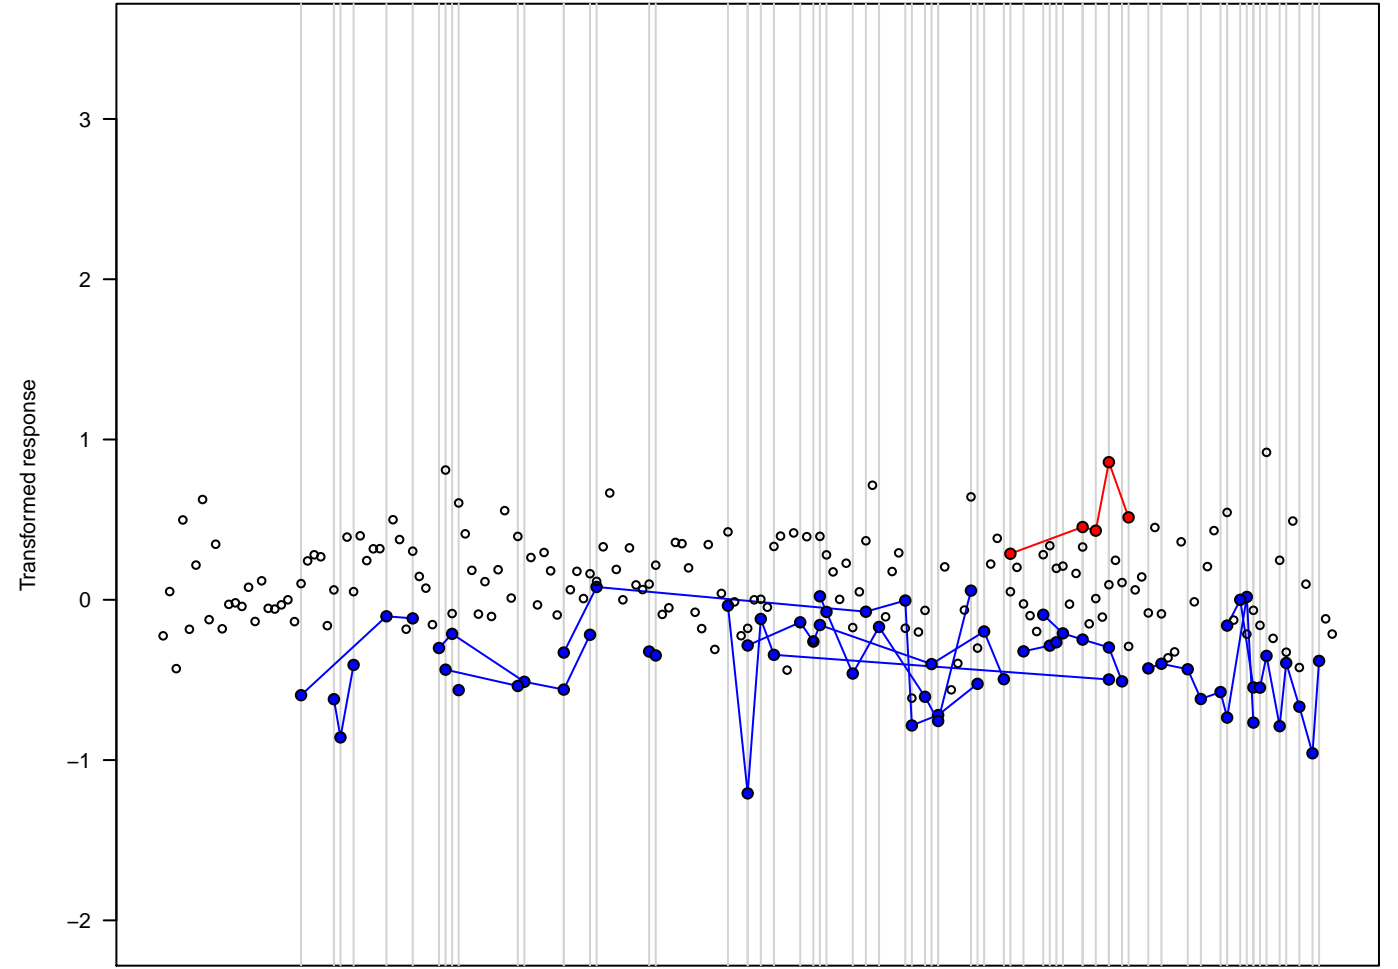

WTSI

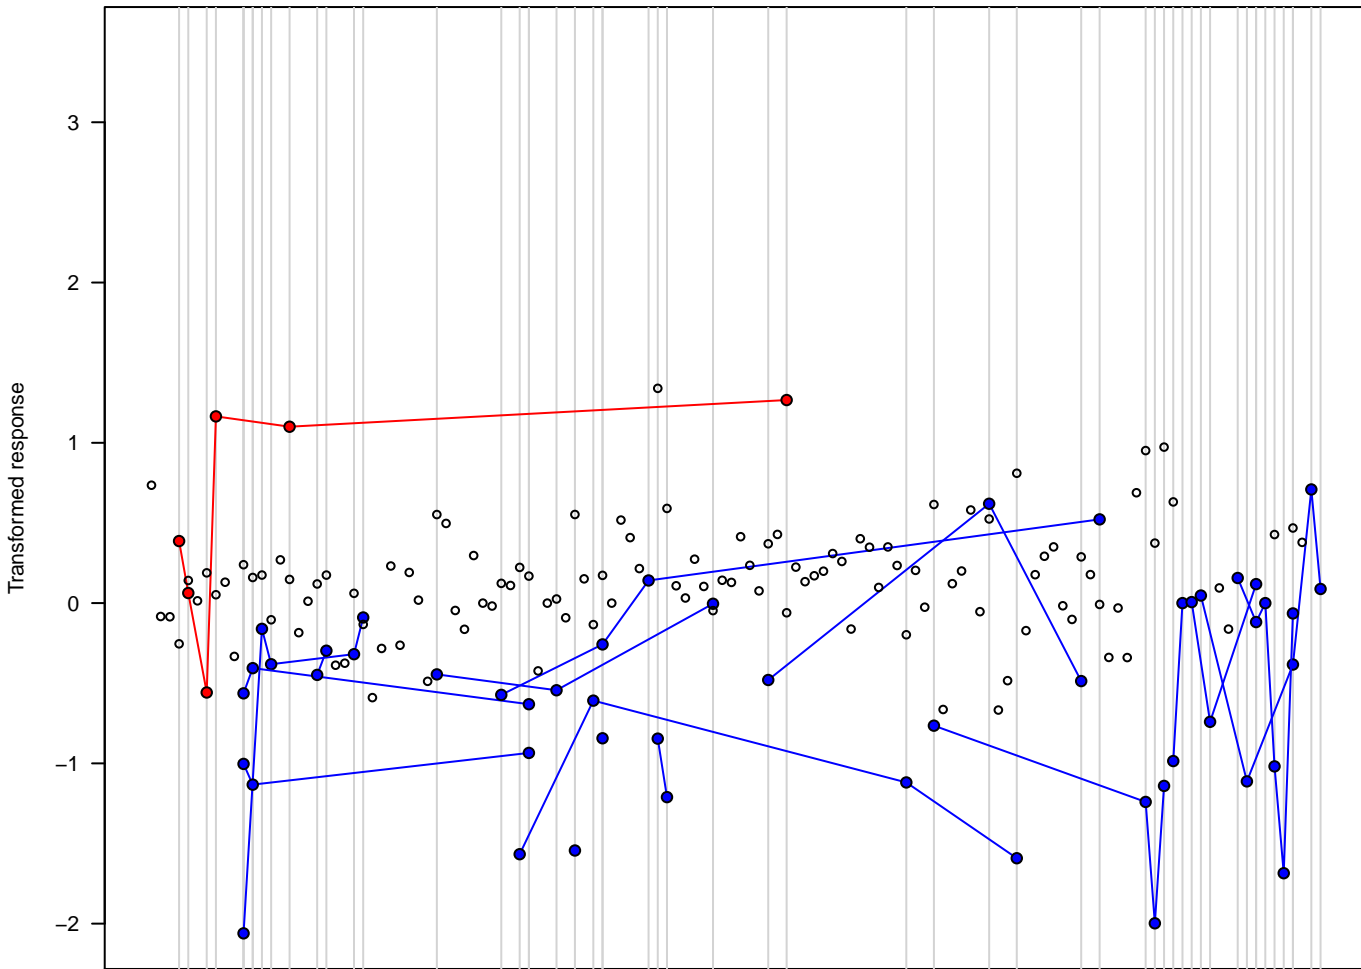

ICS

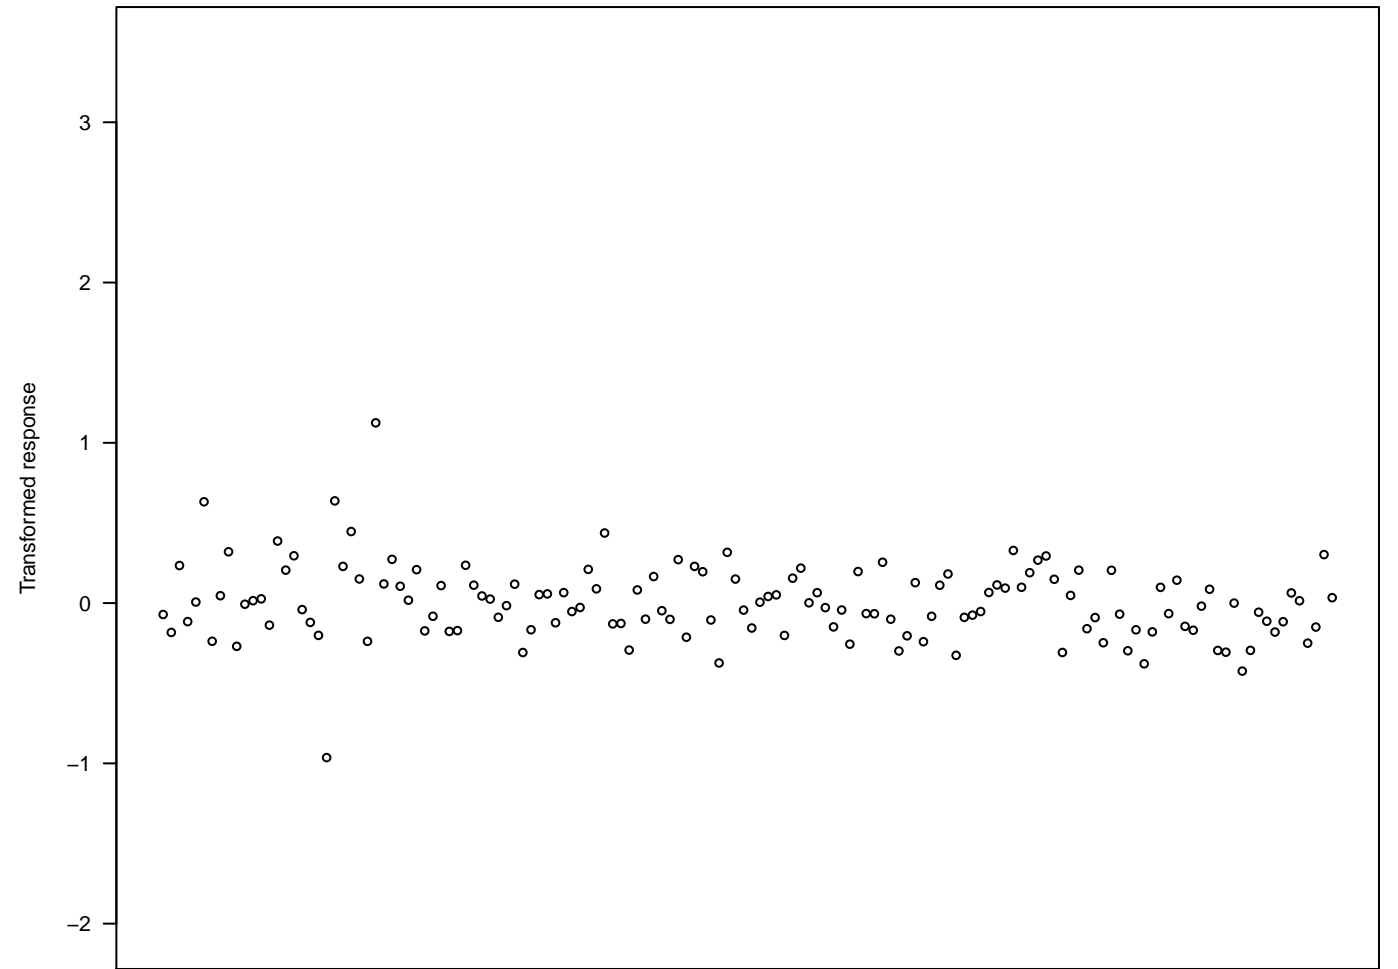

Lean mass  
(DEXA)

HMGU

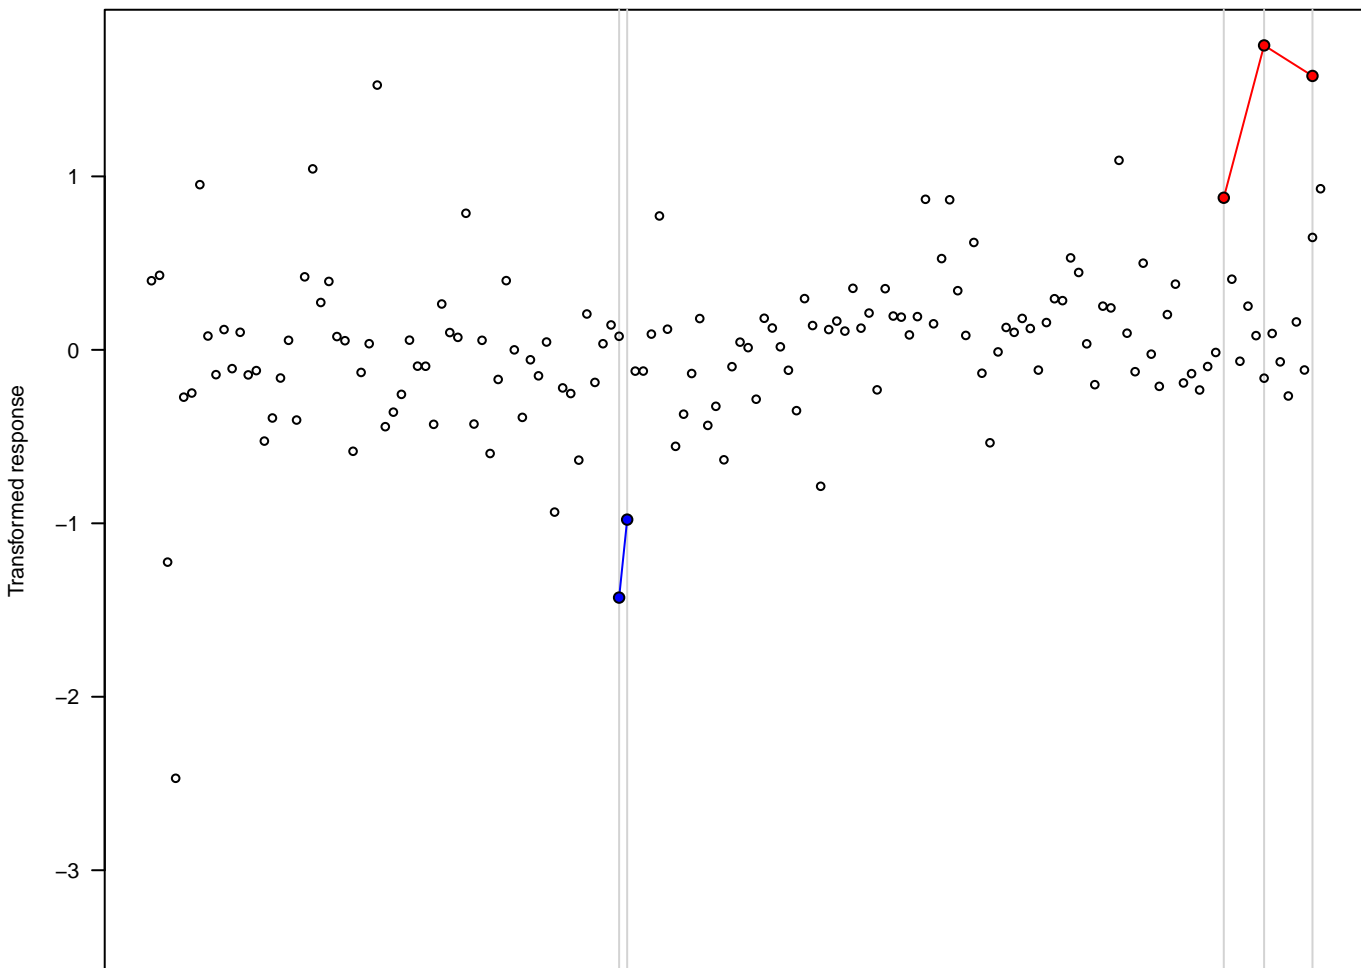

MRC Harwell

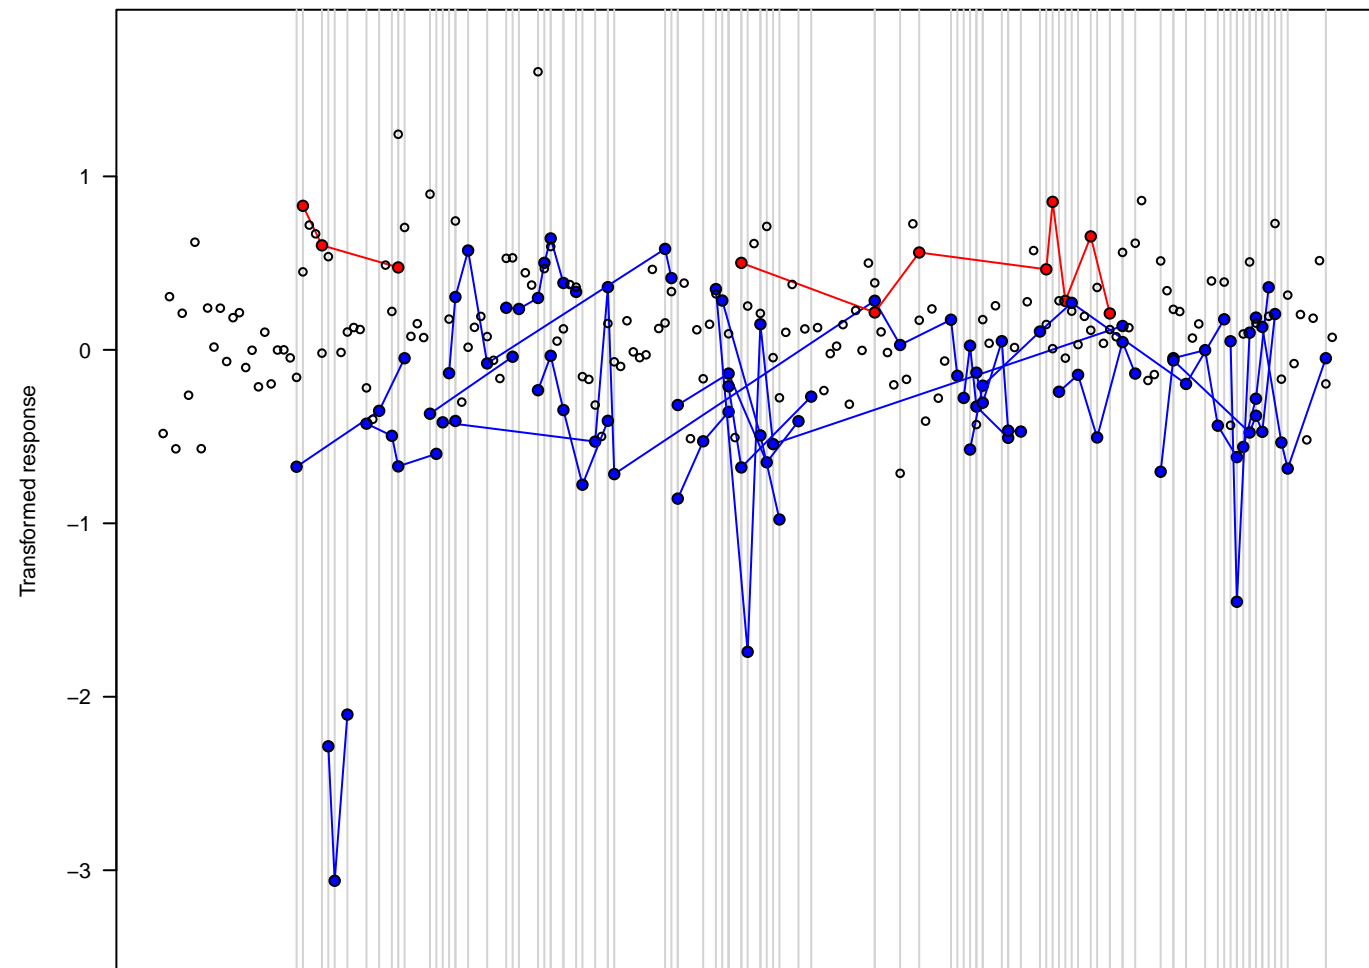

WTSI

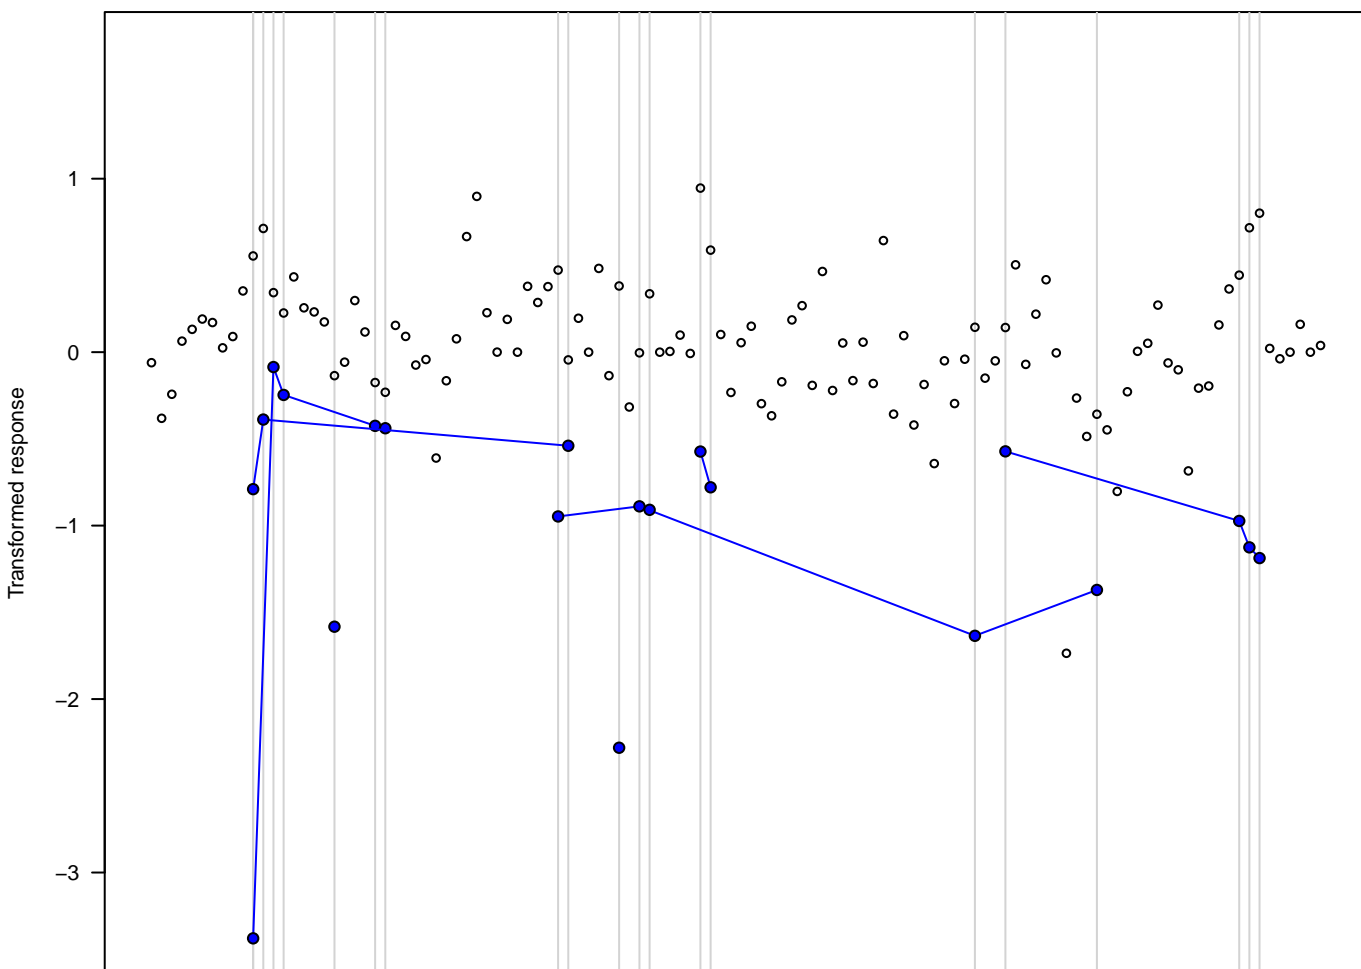

ICS

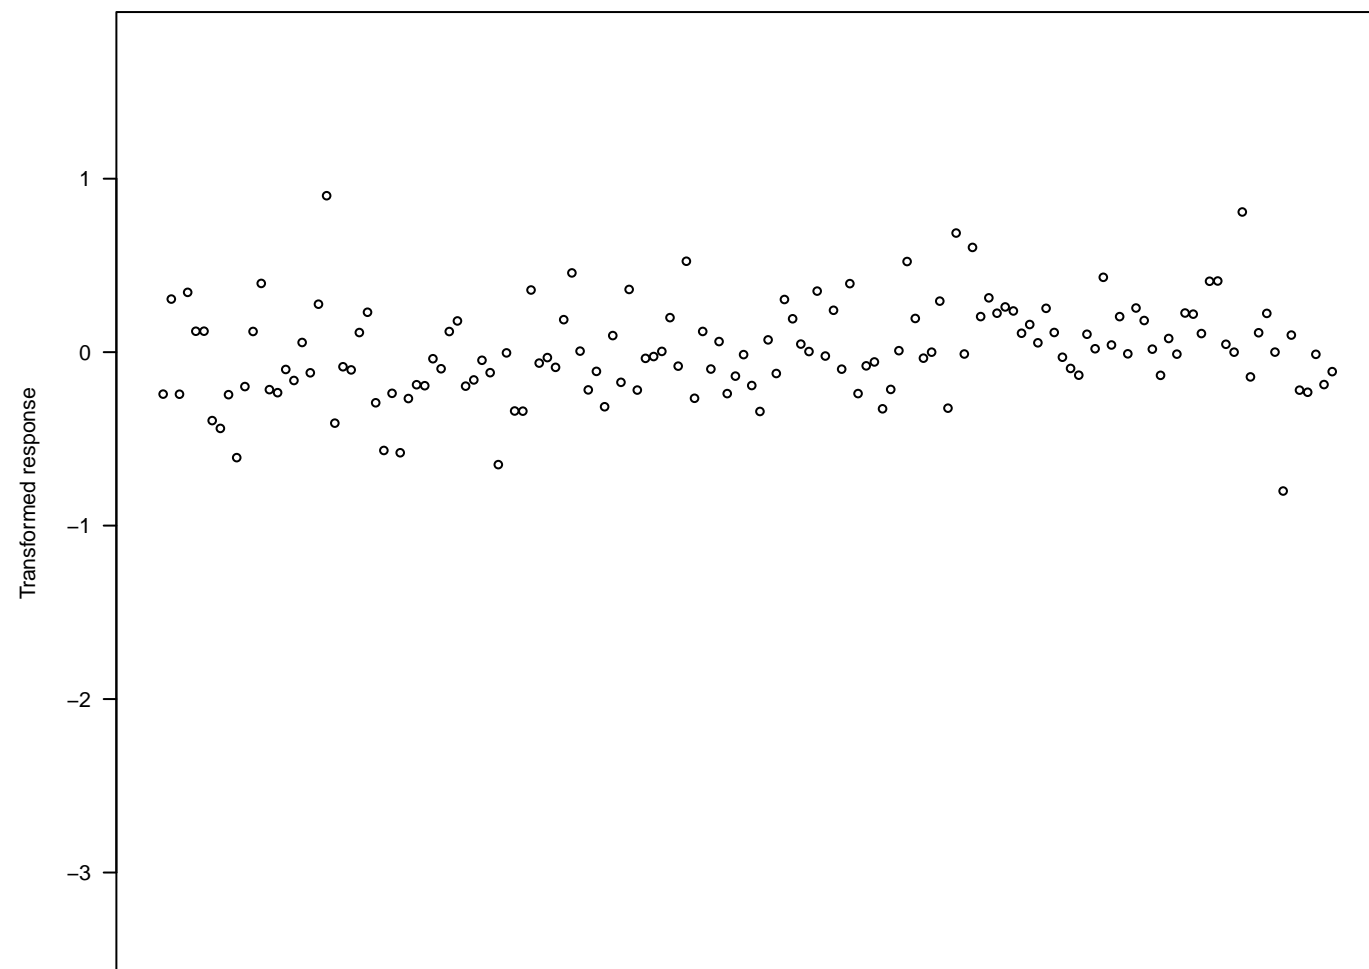

Bone Mineral Density (excluding skull)  
(DEXA)

HMGU

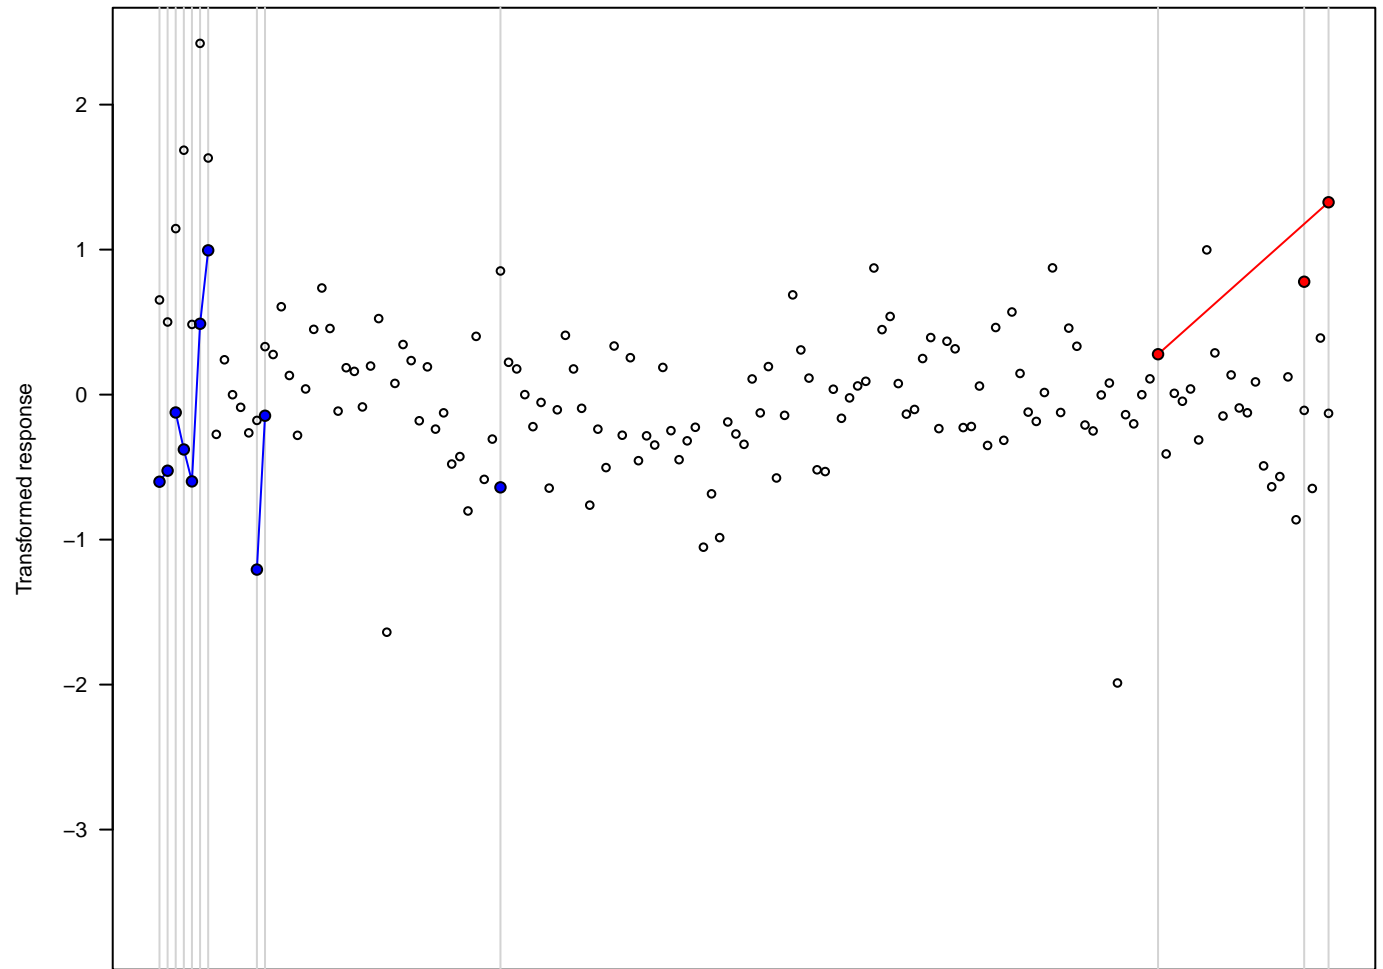

MRC Harwell

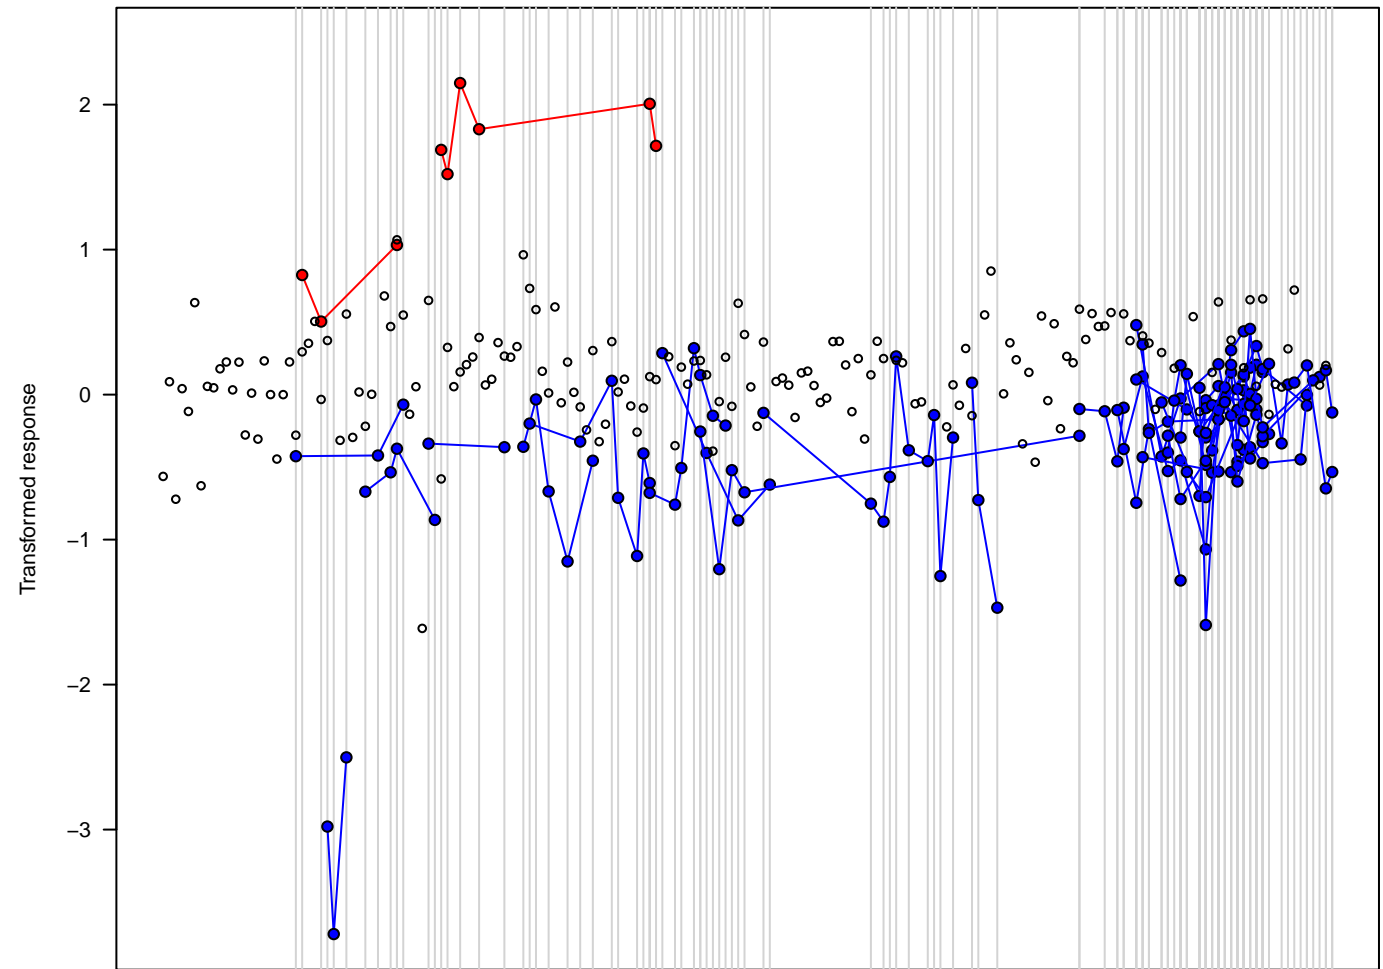

WTSI

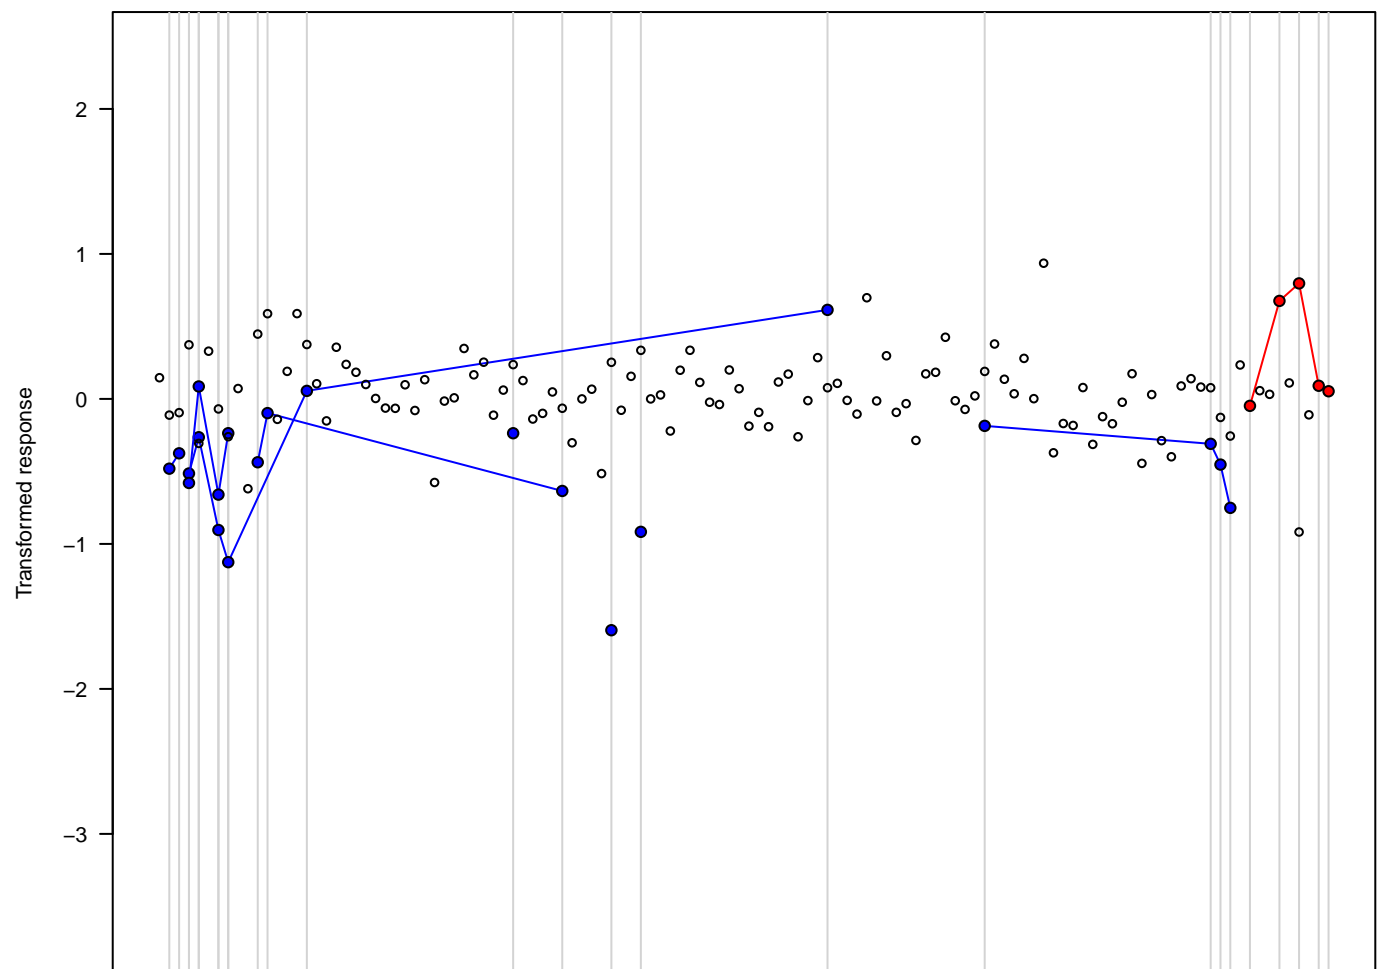

ICS

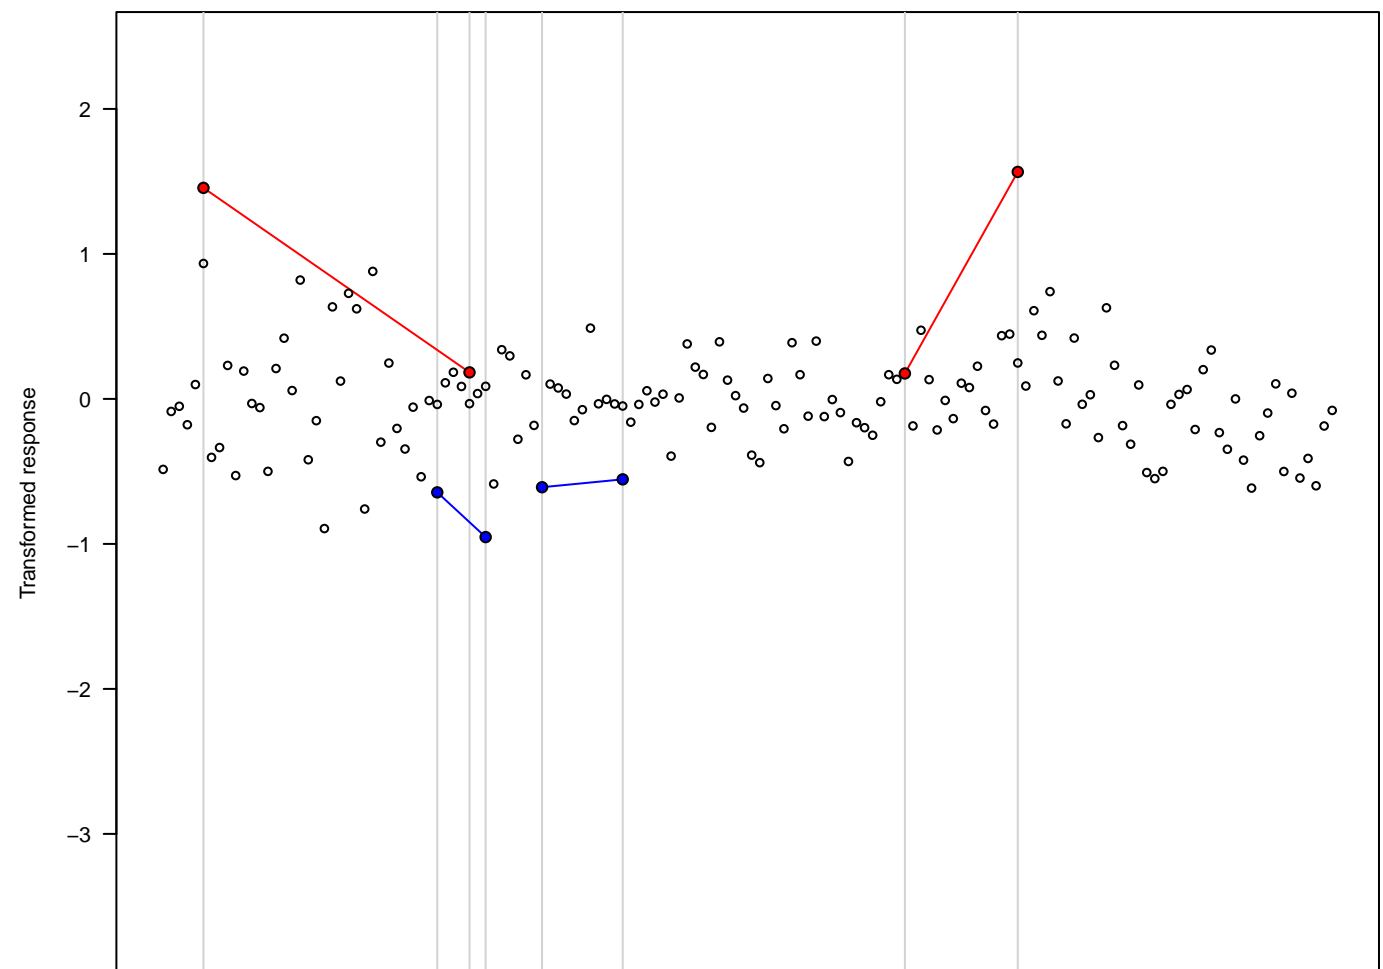



# Bone Mineral Content (DEXA)

## HMGU

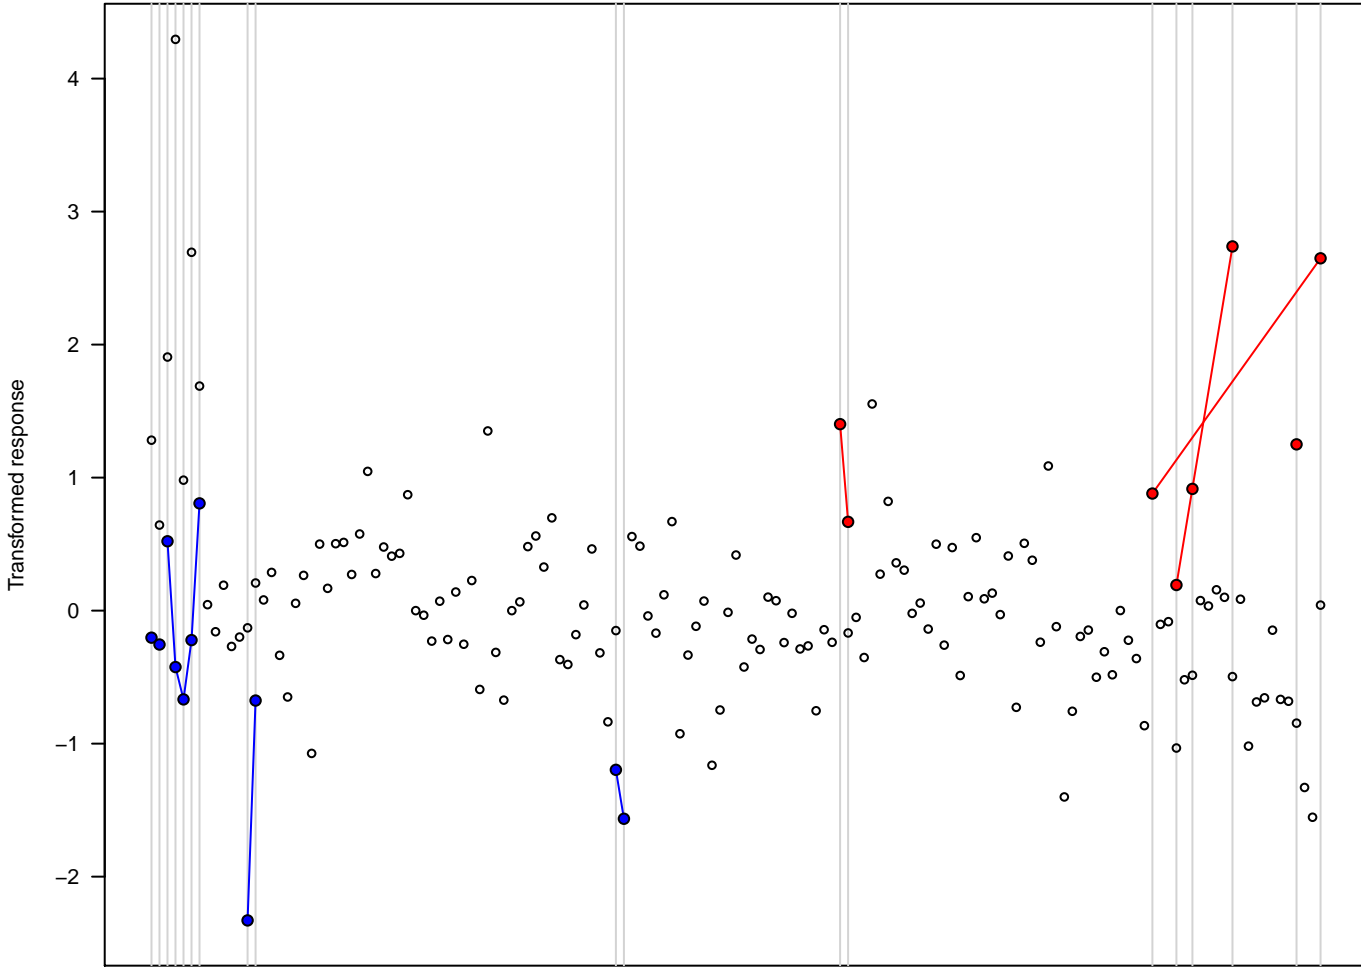

## MRC Harwell

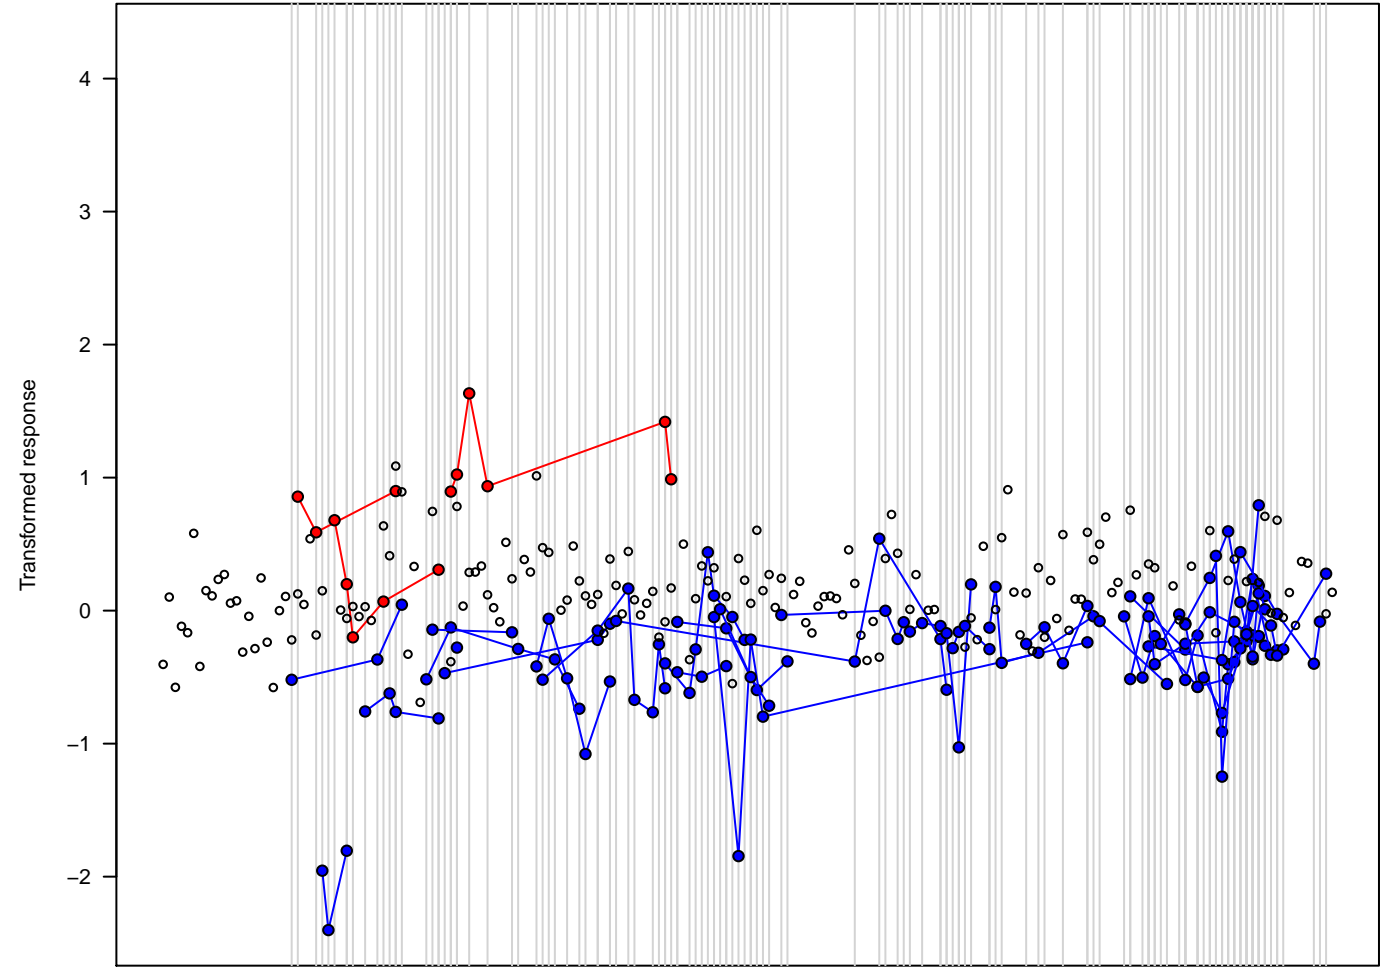

## WTSI

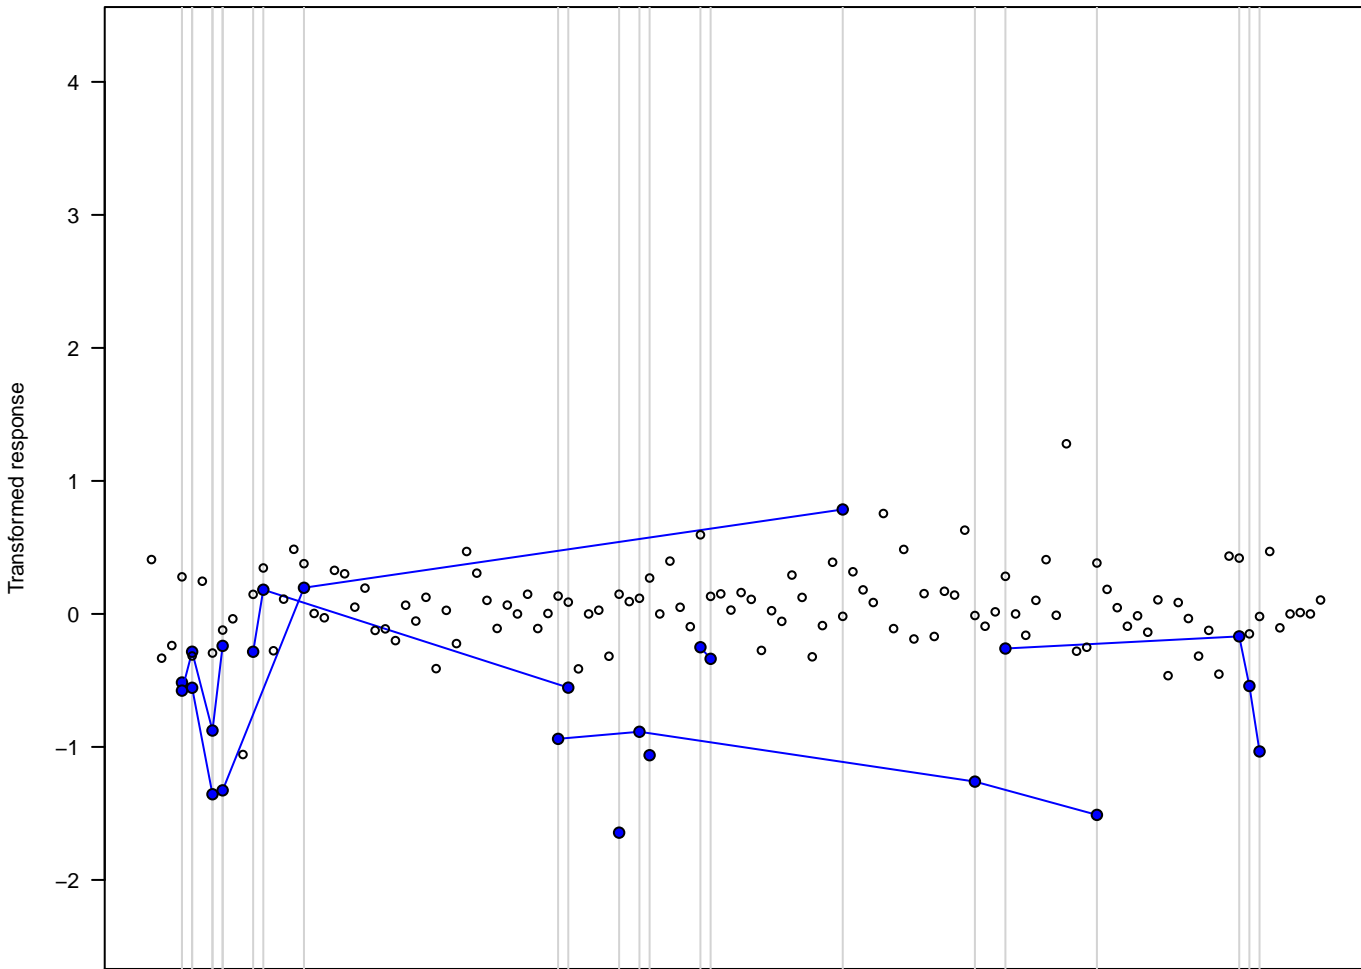

## ICS

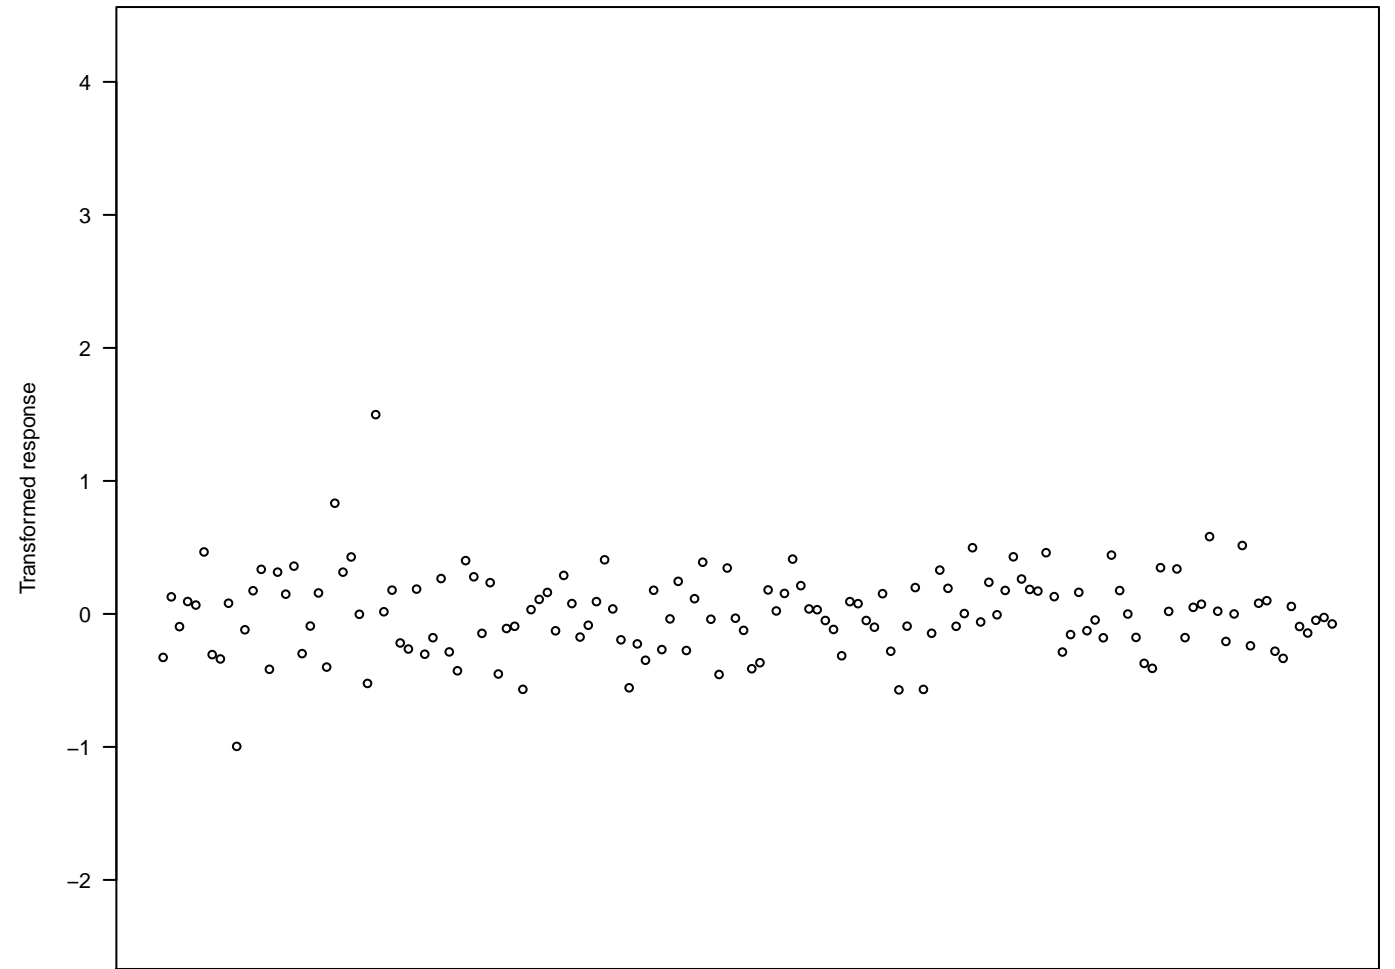

Body length  
(DEXA)

HMGU

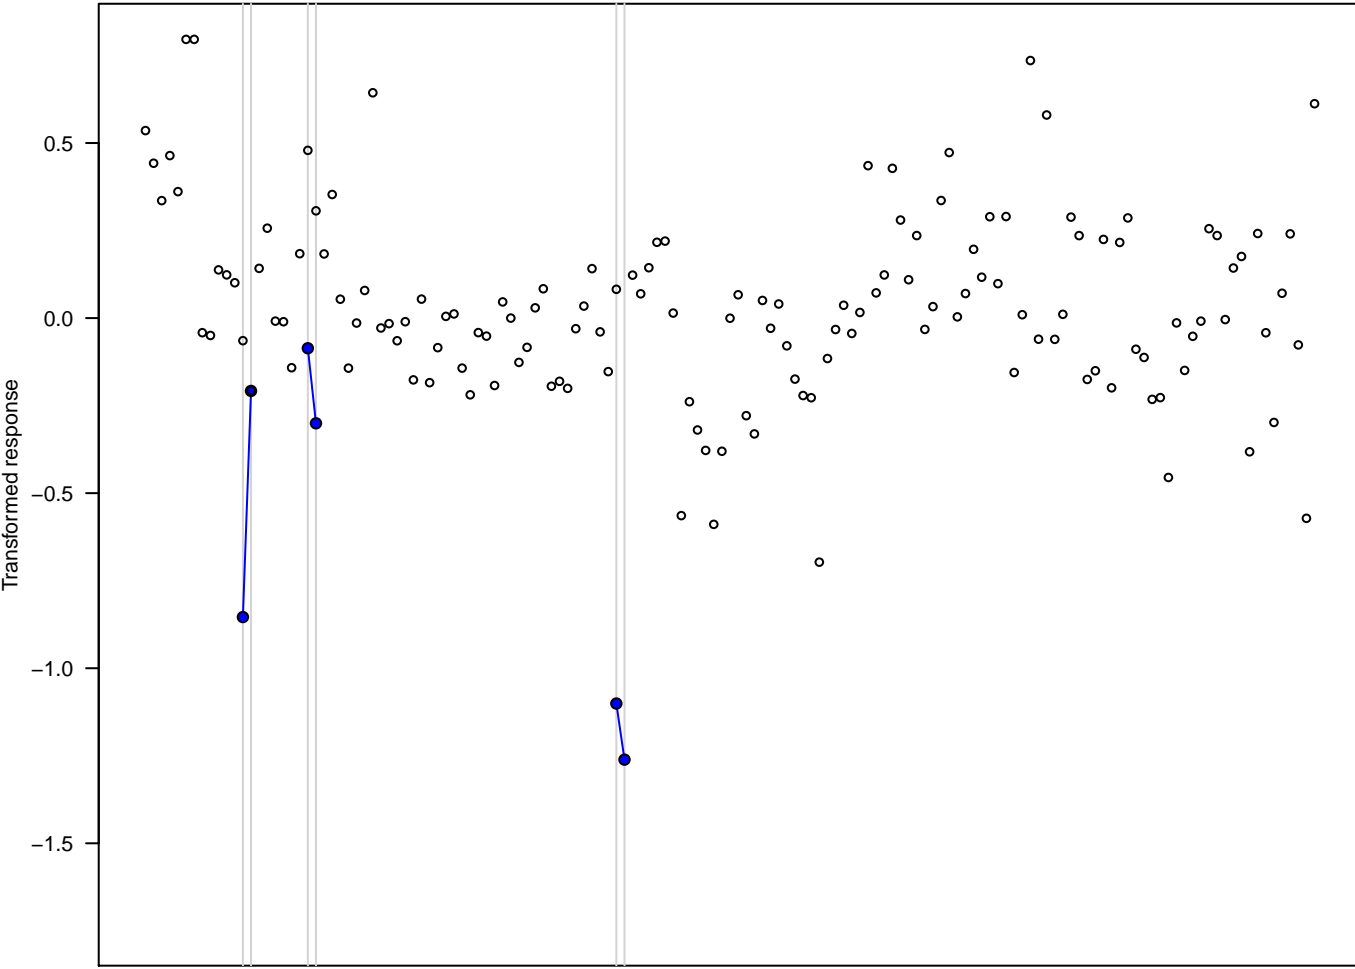

MRC Harwell



WTSI

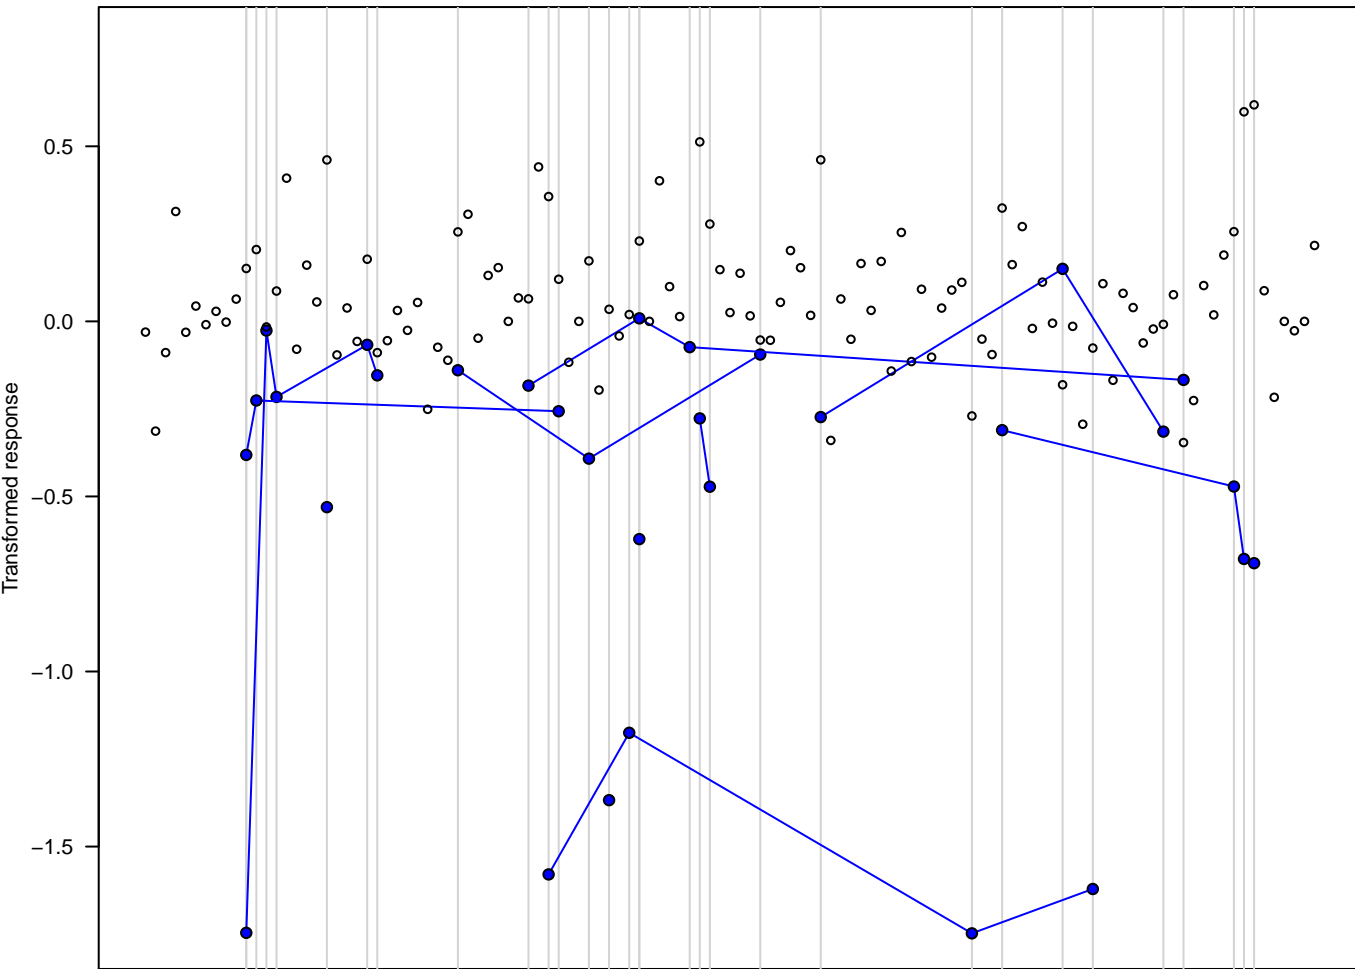

ICS

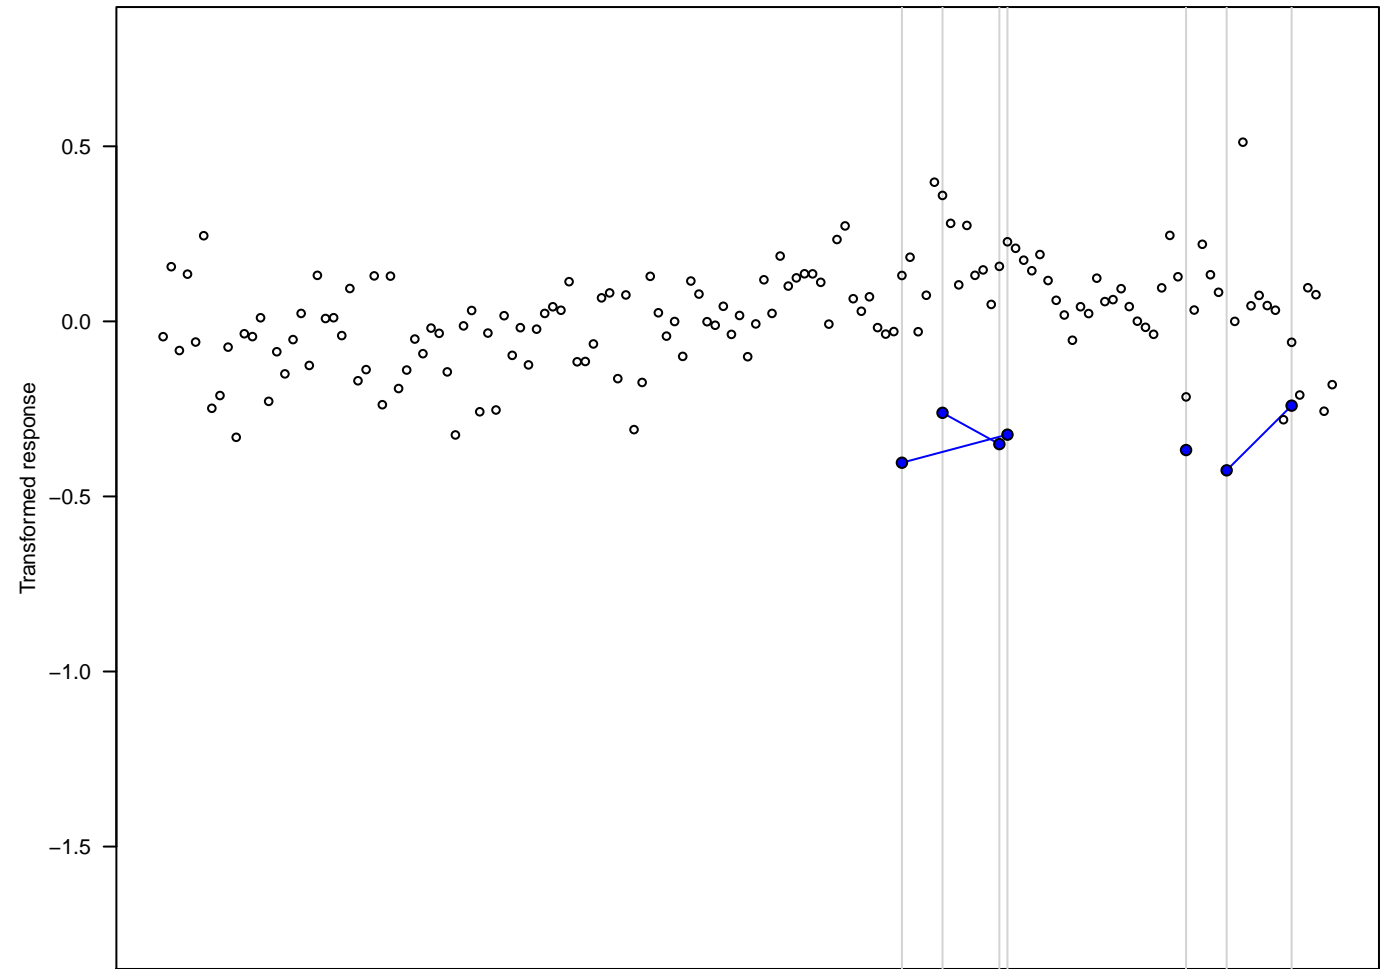

BMC/Body weight  
(DEXA)

HMGU

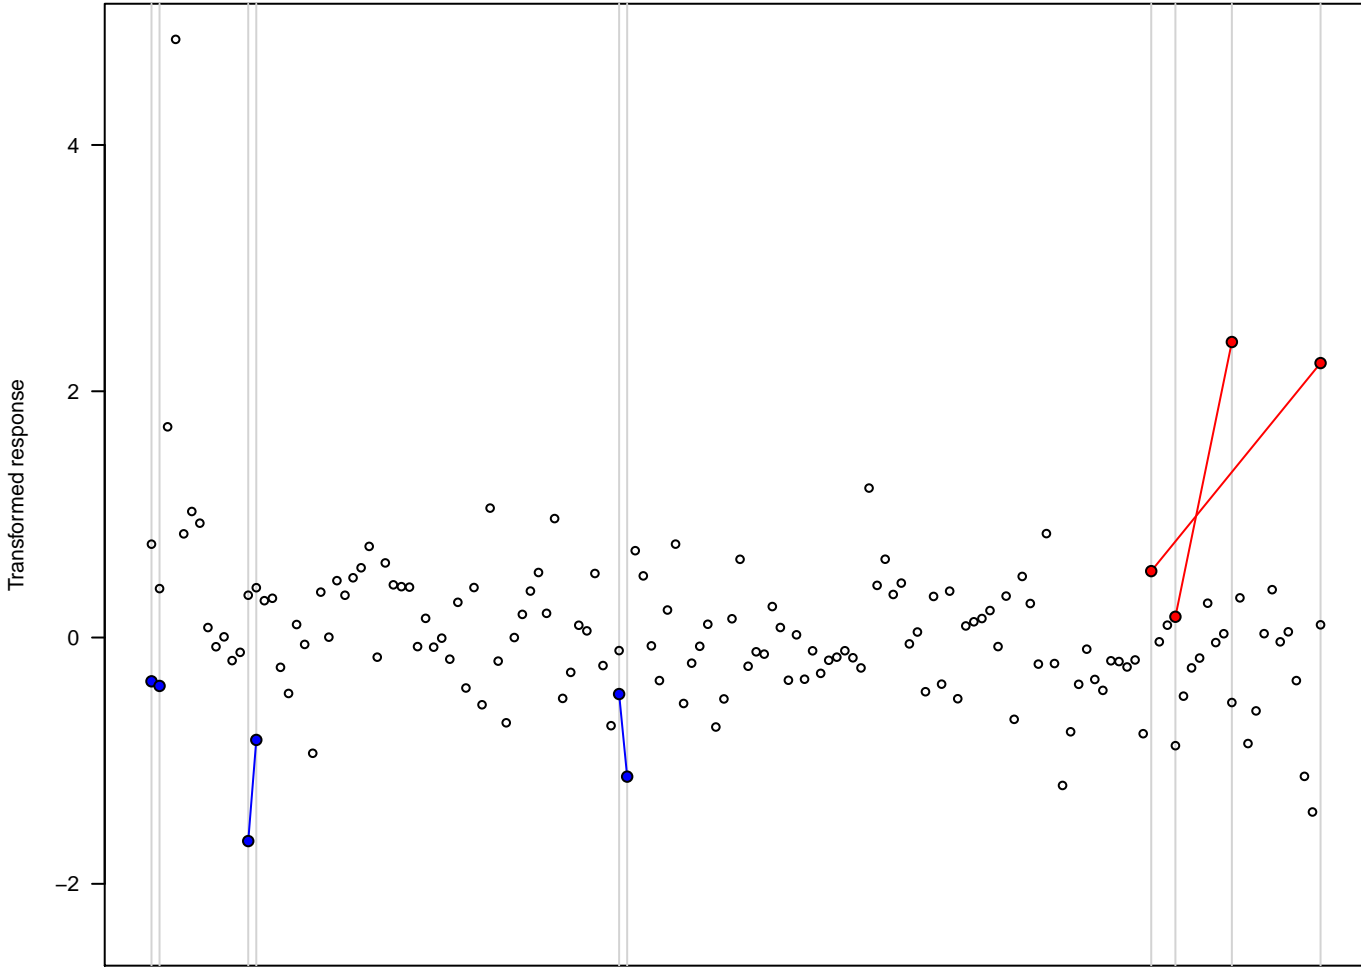

MRC Harwell

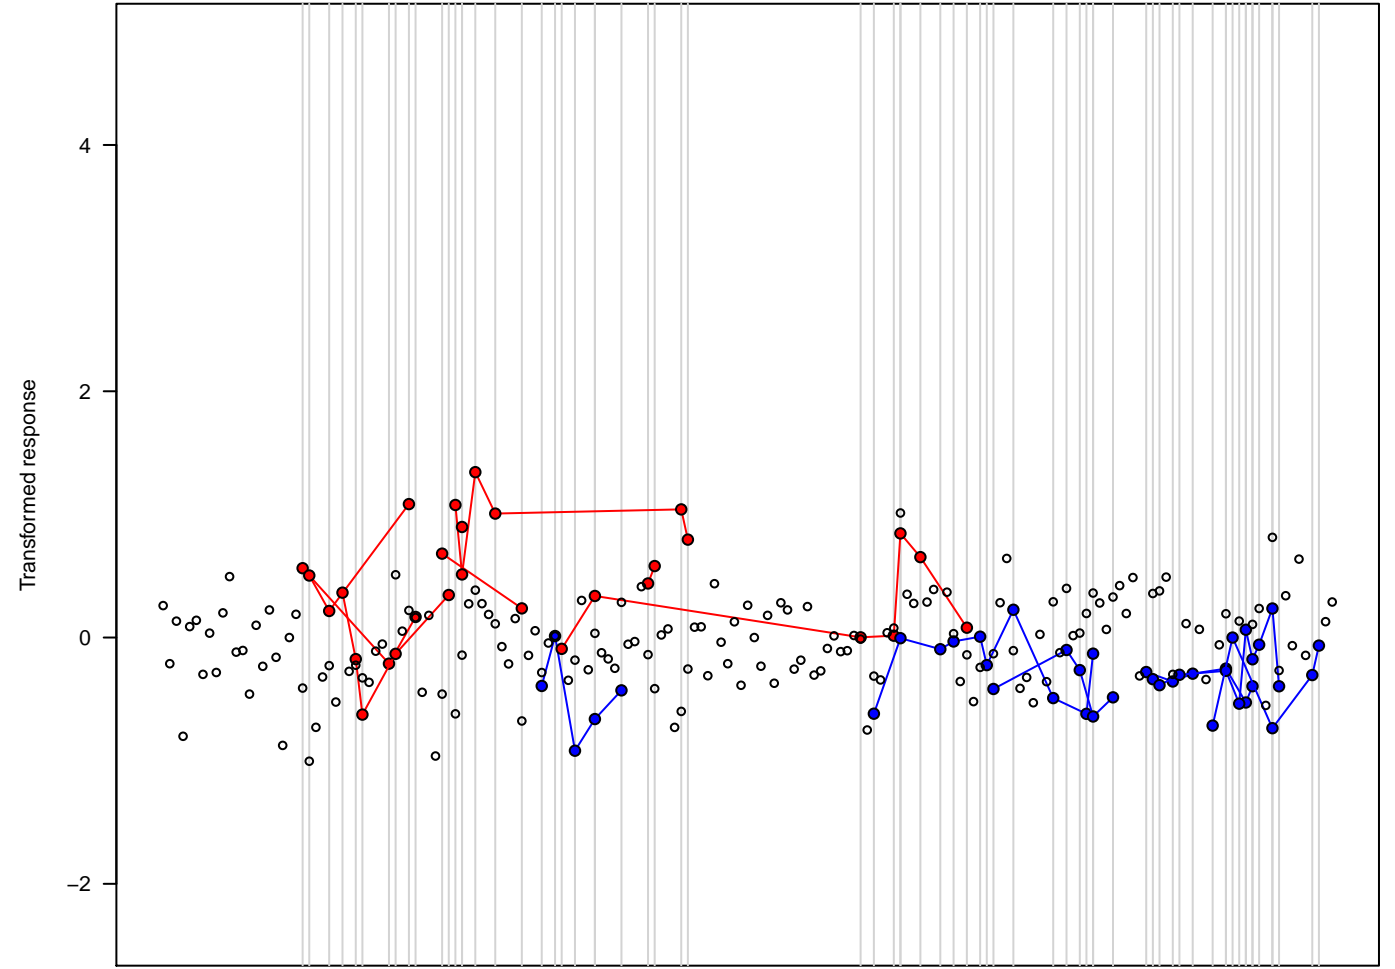

WTSI

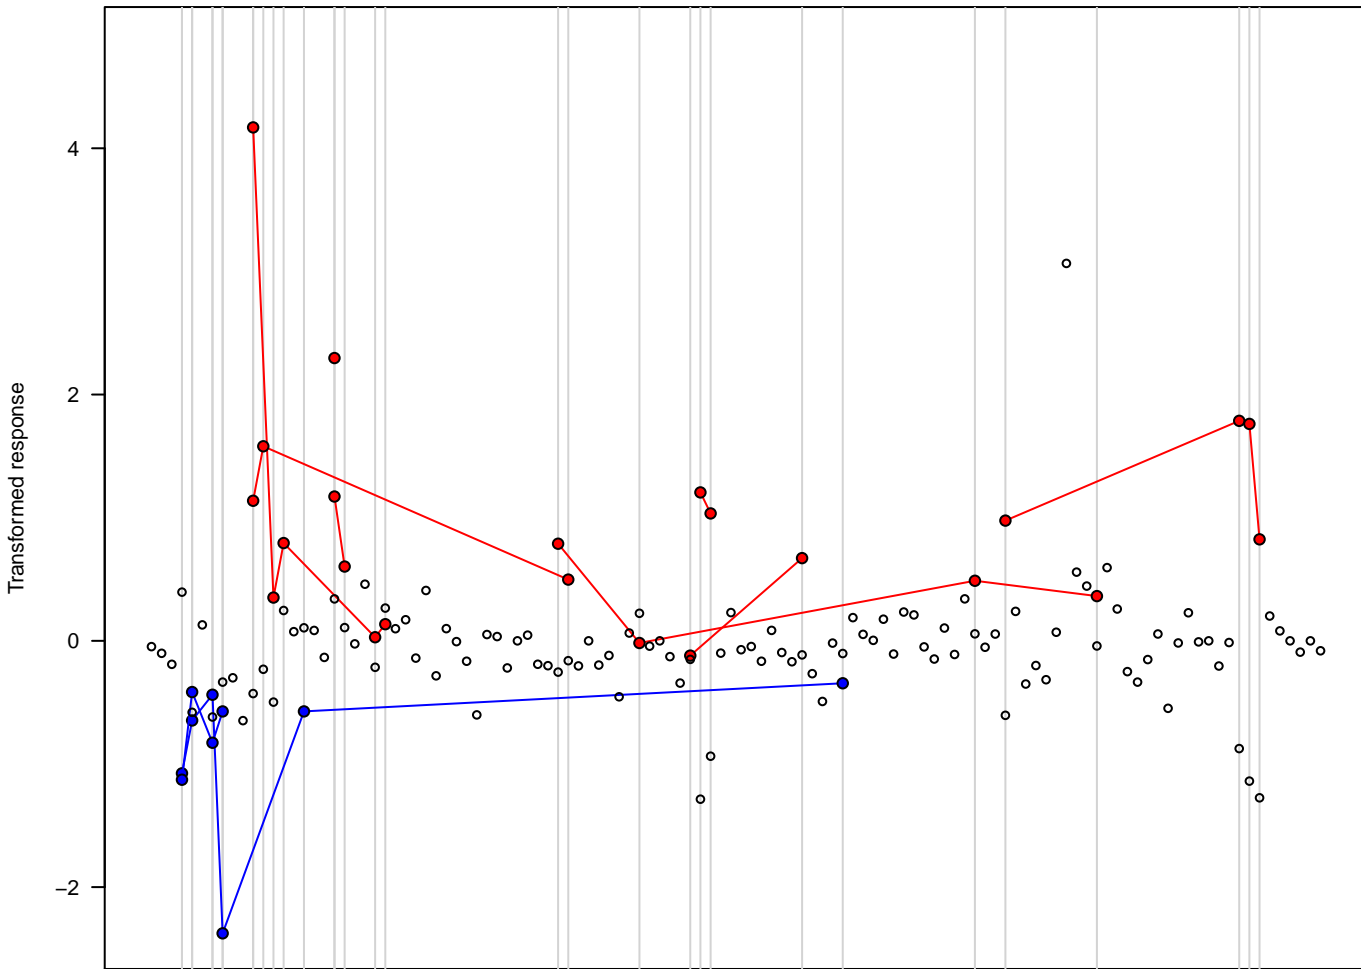

ICS

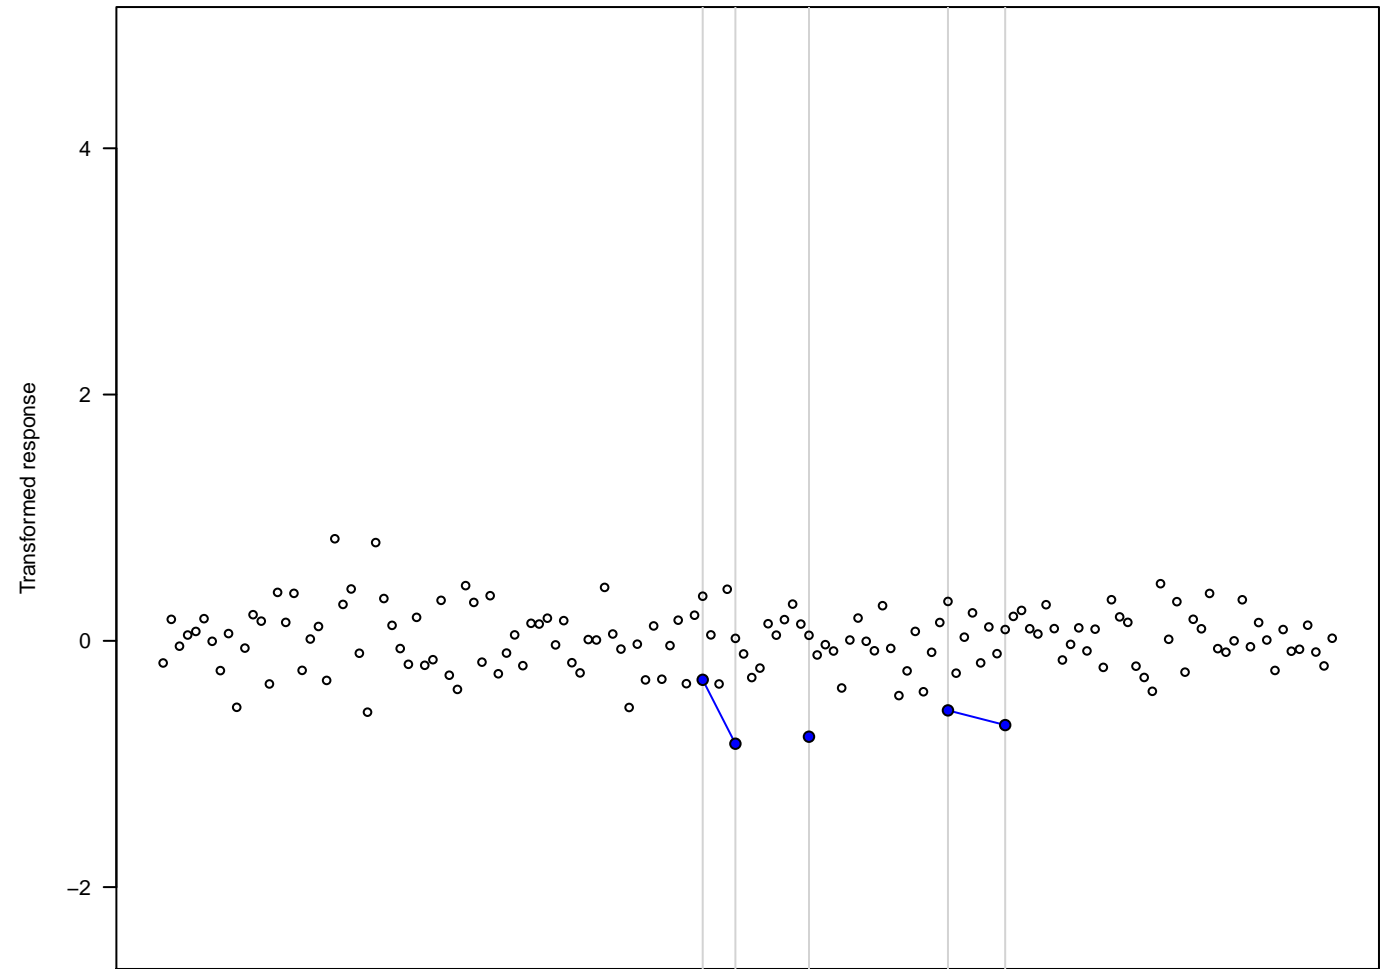

Lean/Body weight  
(DEXA)

HMGU

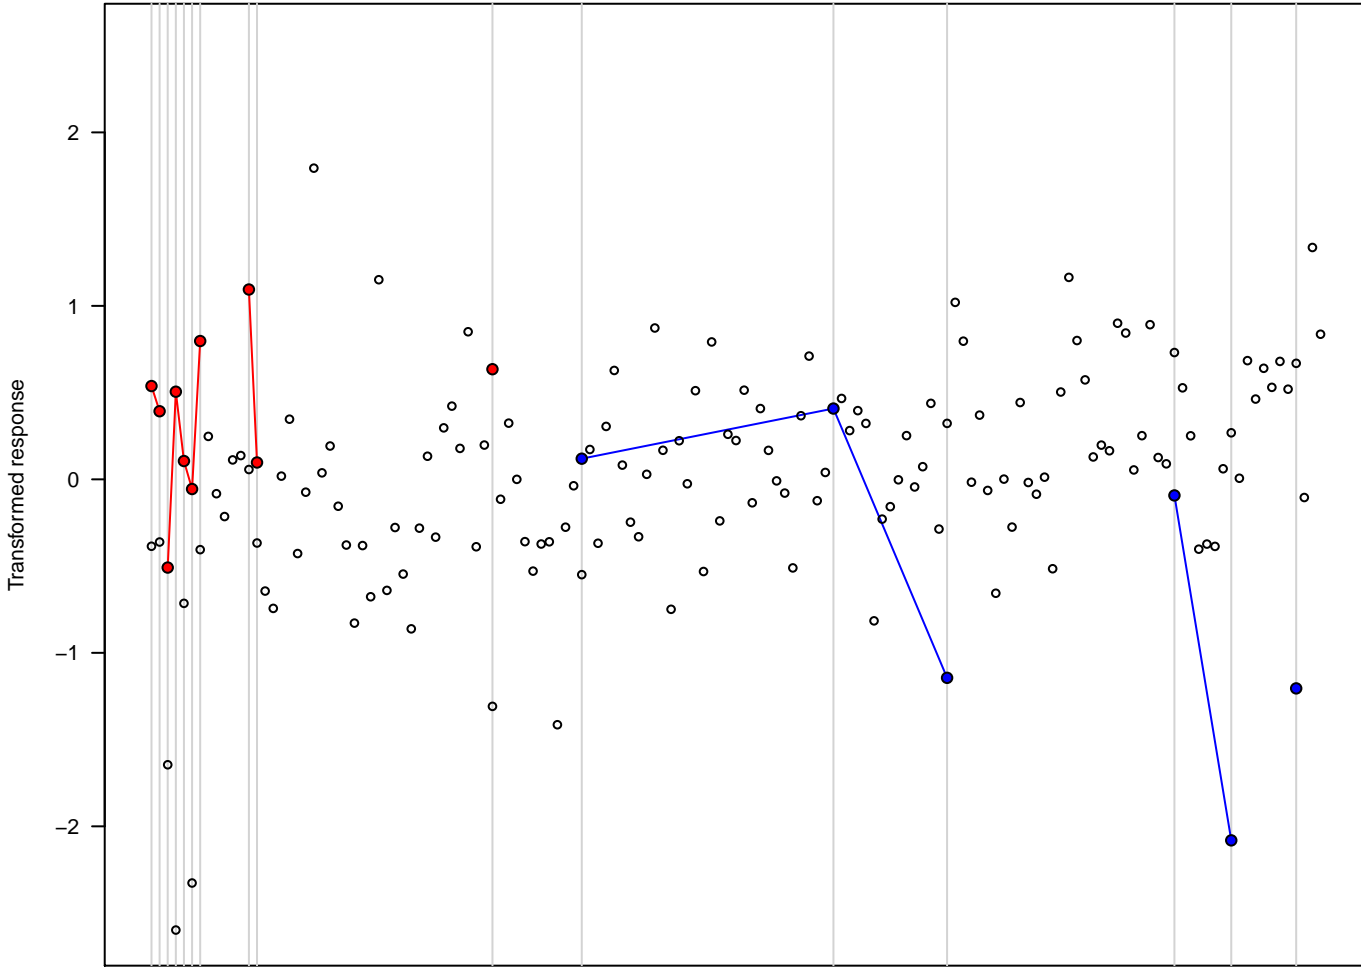

MRC Harwell

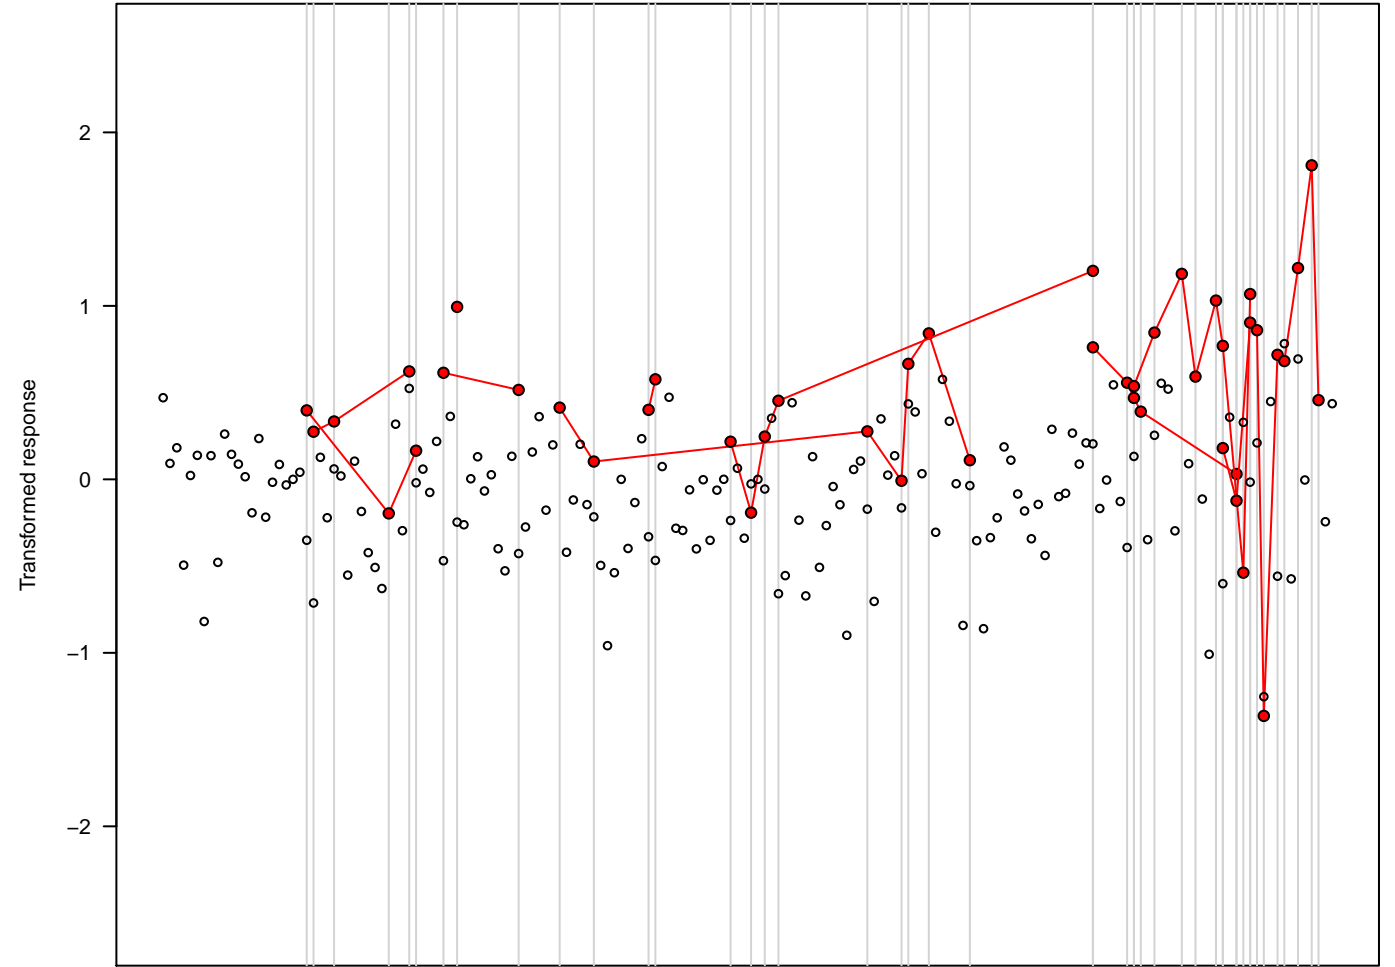

WTSI

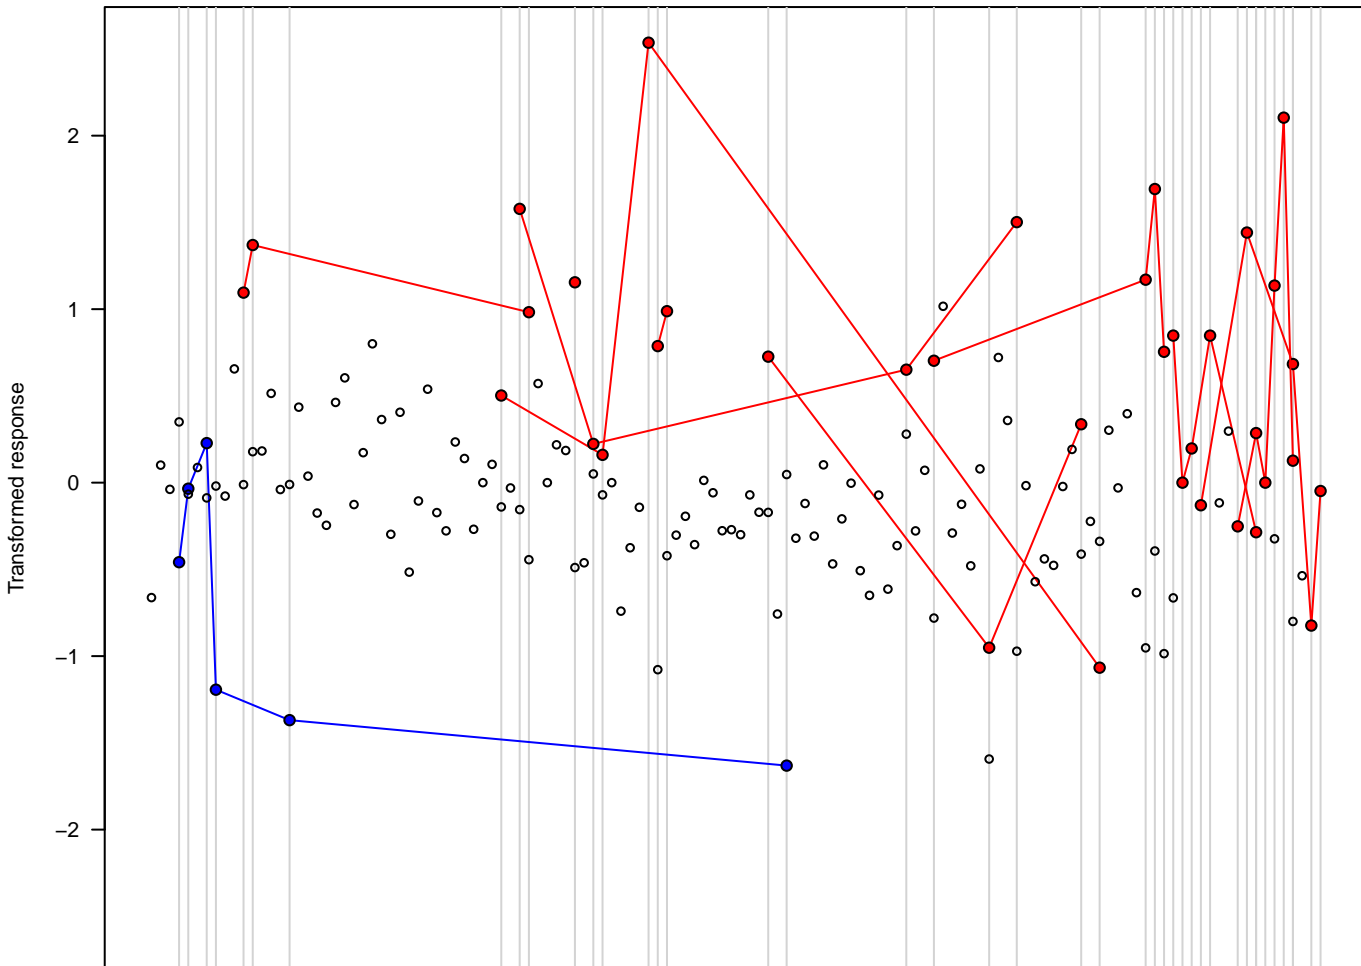

ICS

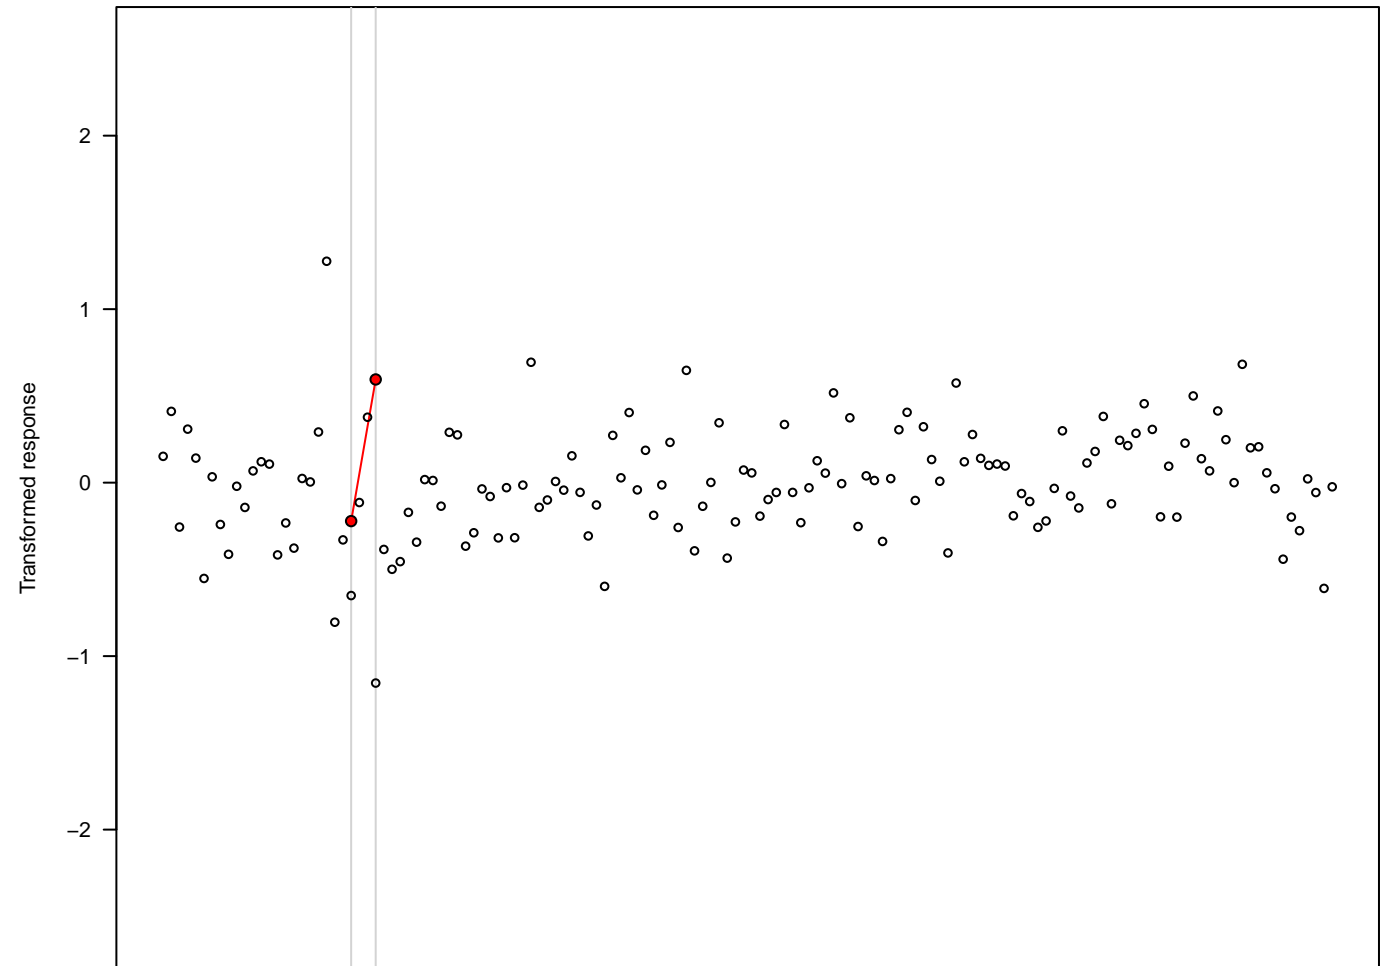

Fat/Body weight  
(DEXA)

HMGU

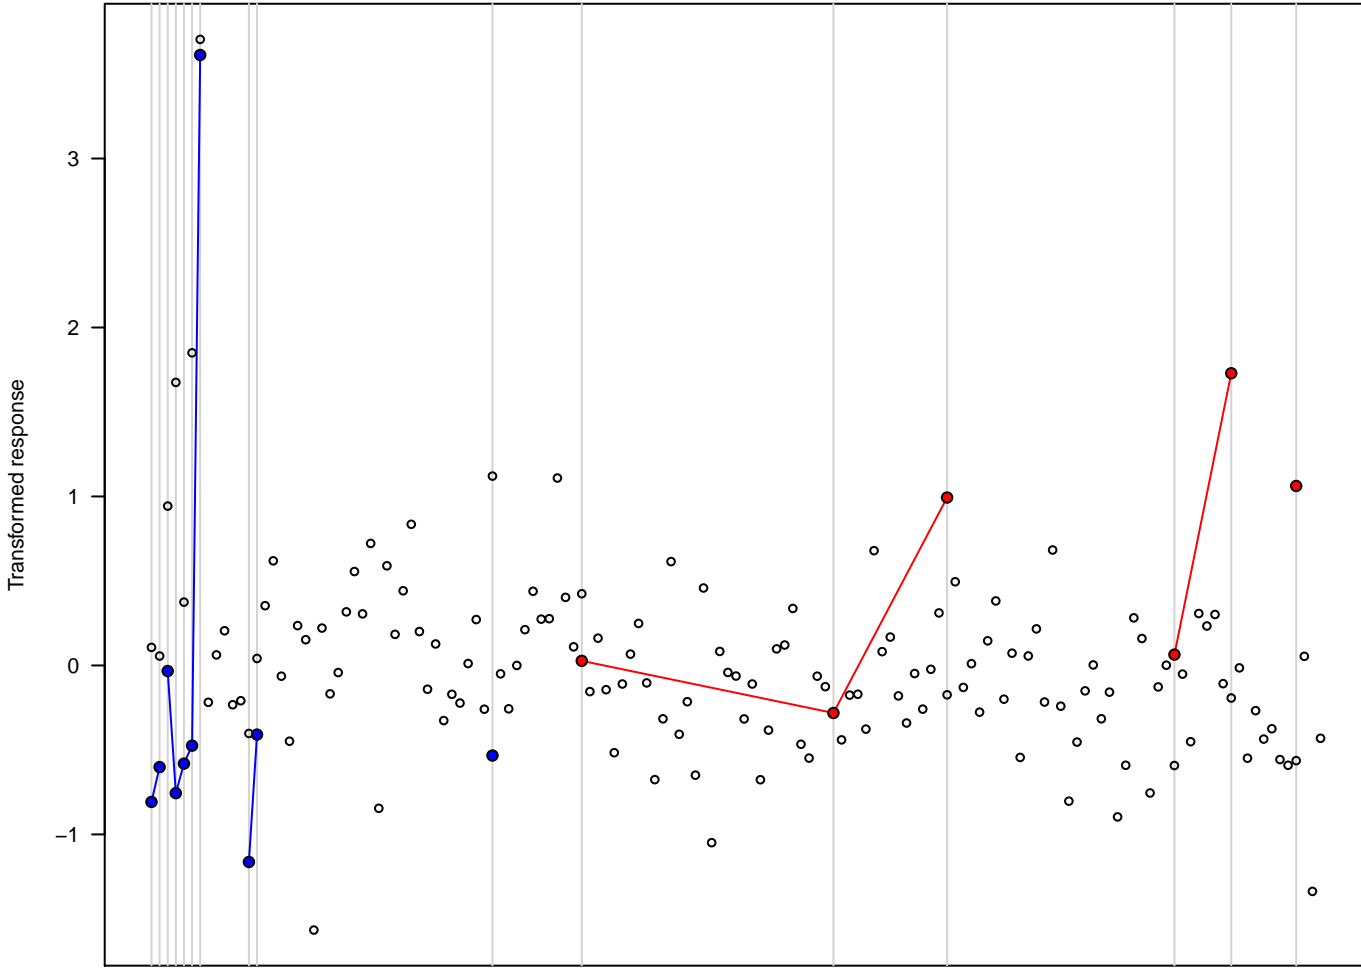

MRC Harwell

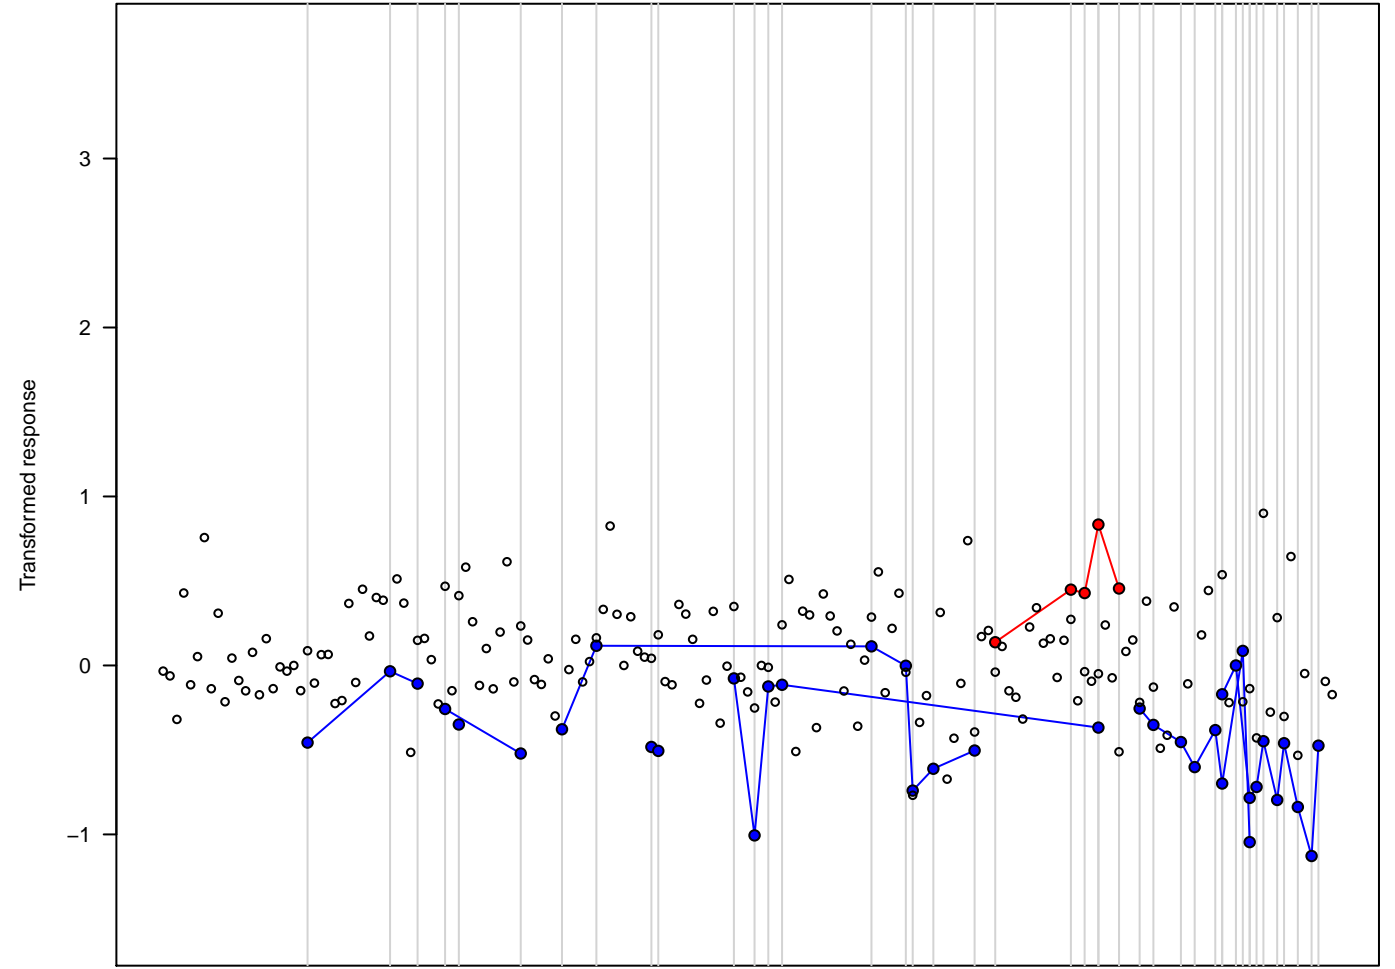

WTSI

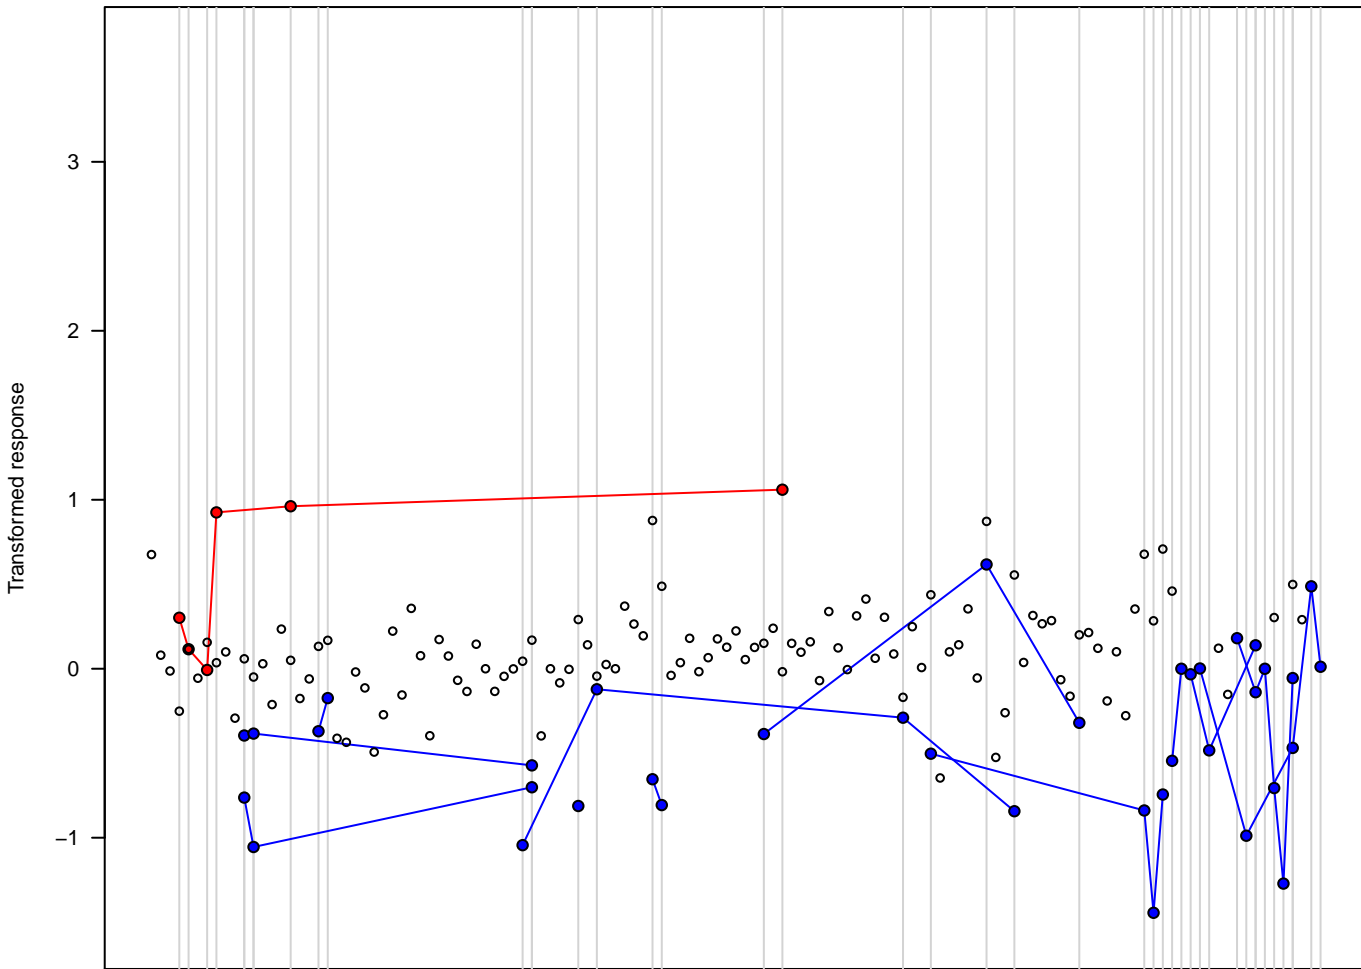

ICS

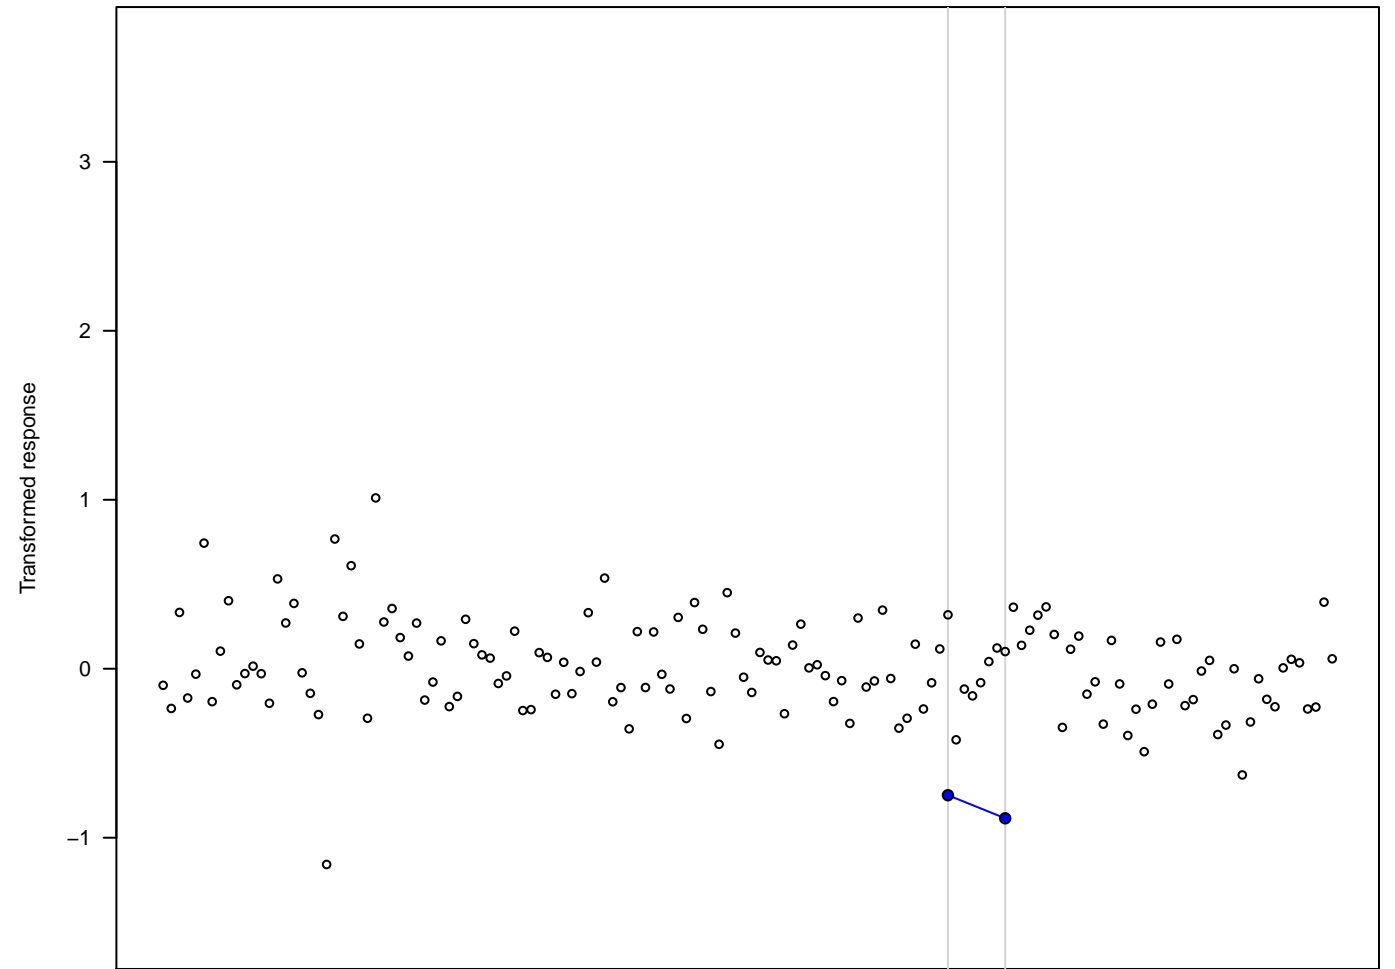

Bone area (BMC/BMD)  
(DEXA)

HMGU

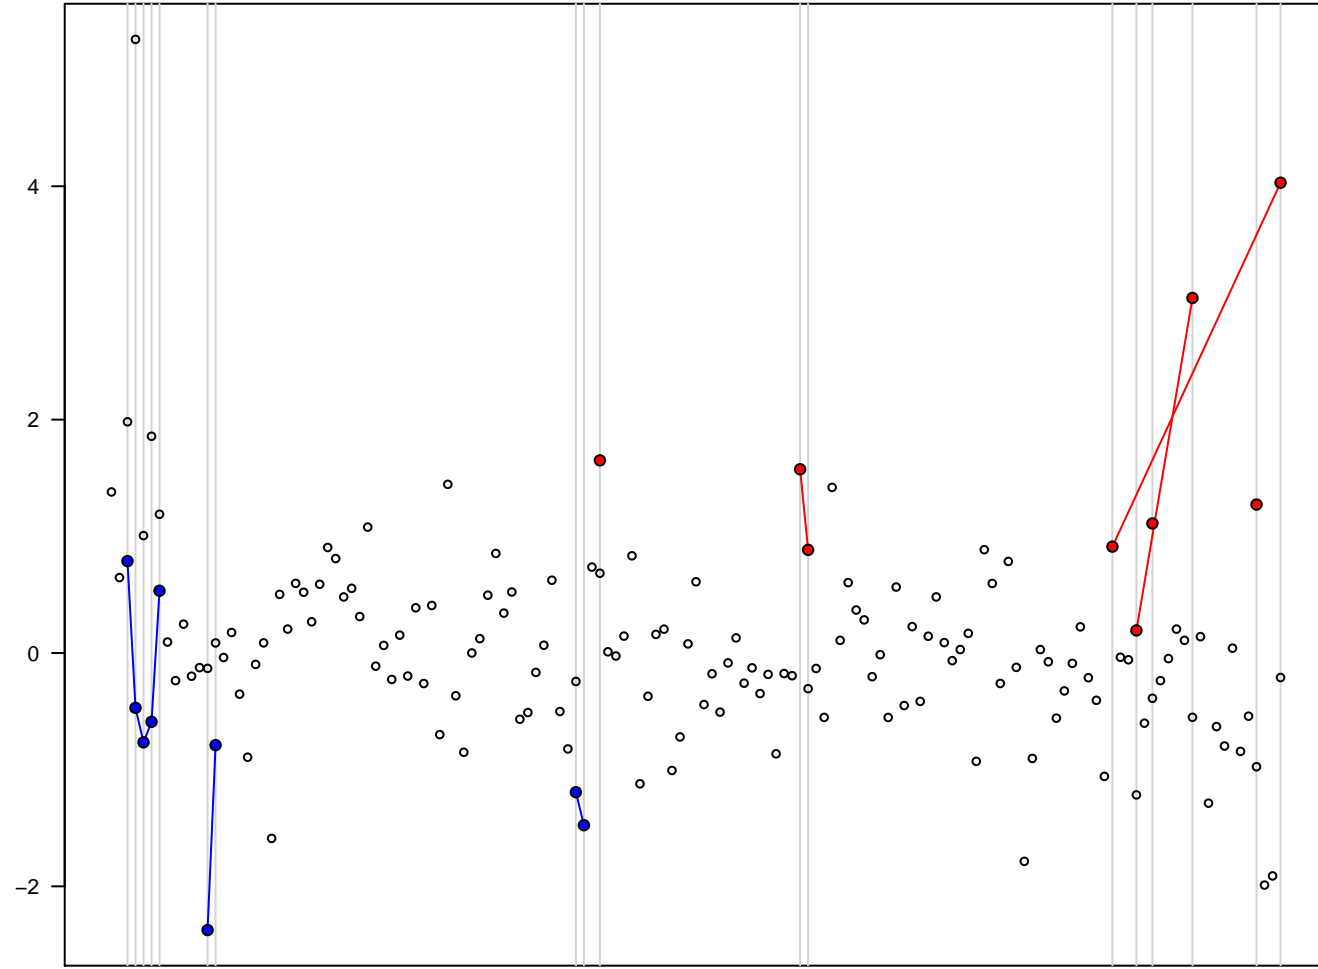

MRC Harwell

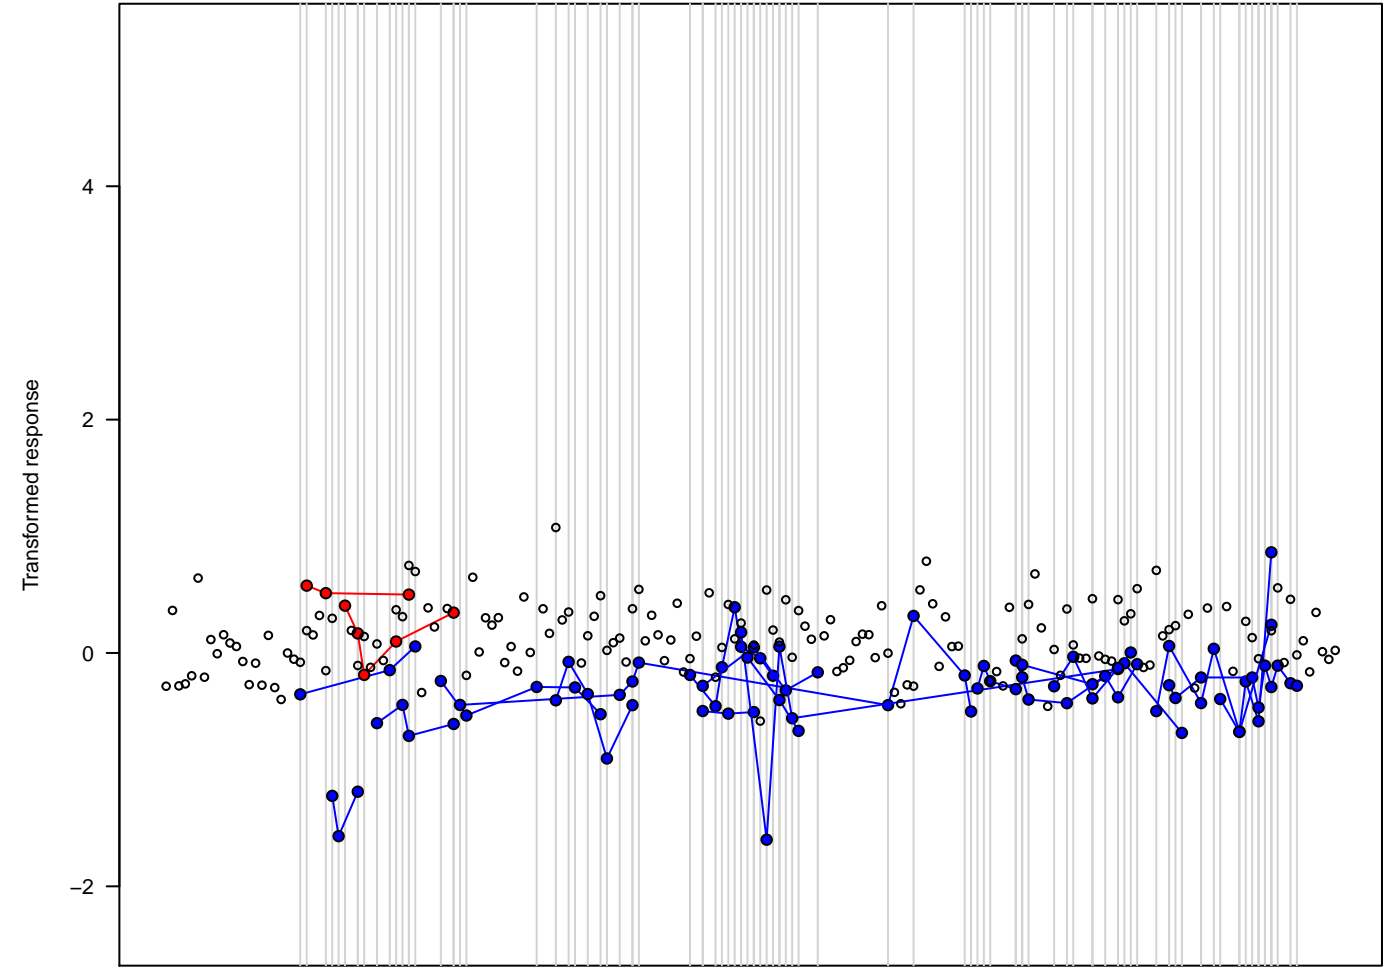

WTSI

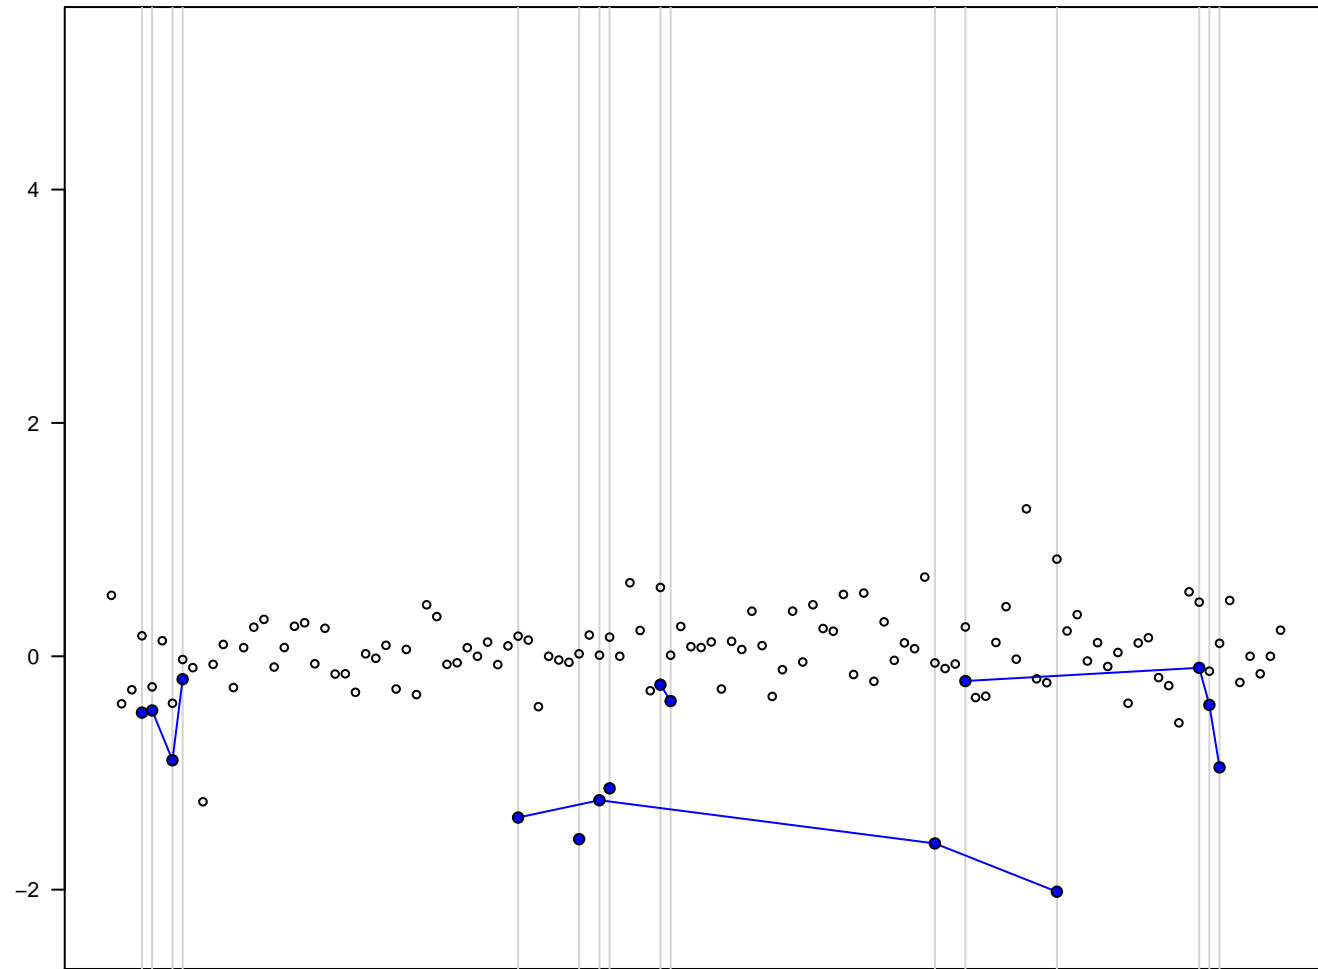

ICS

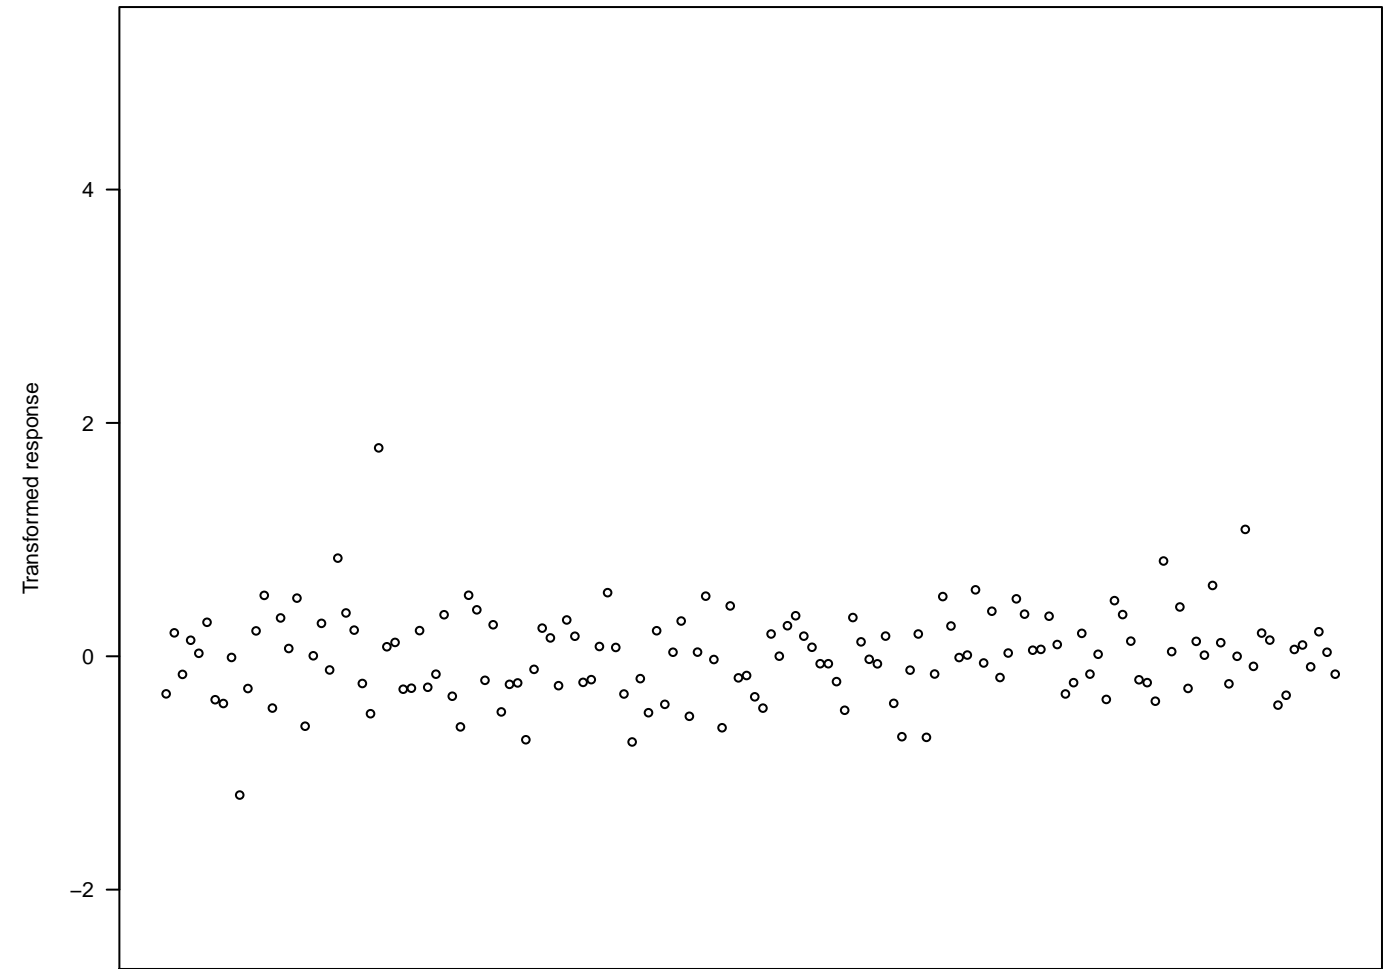

Number of caudal vertebrae  
(X-Ray)

HMGU

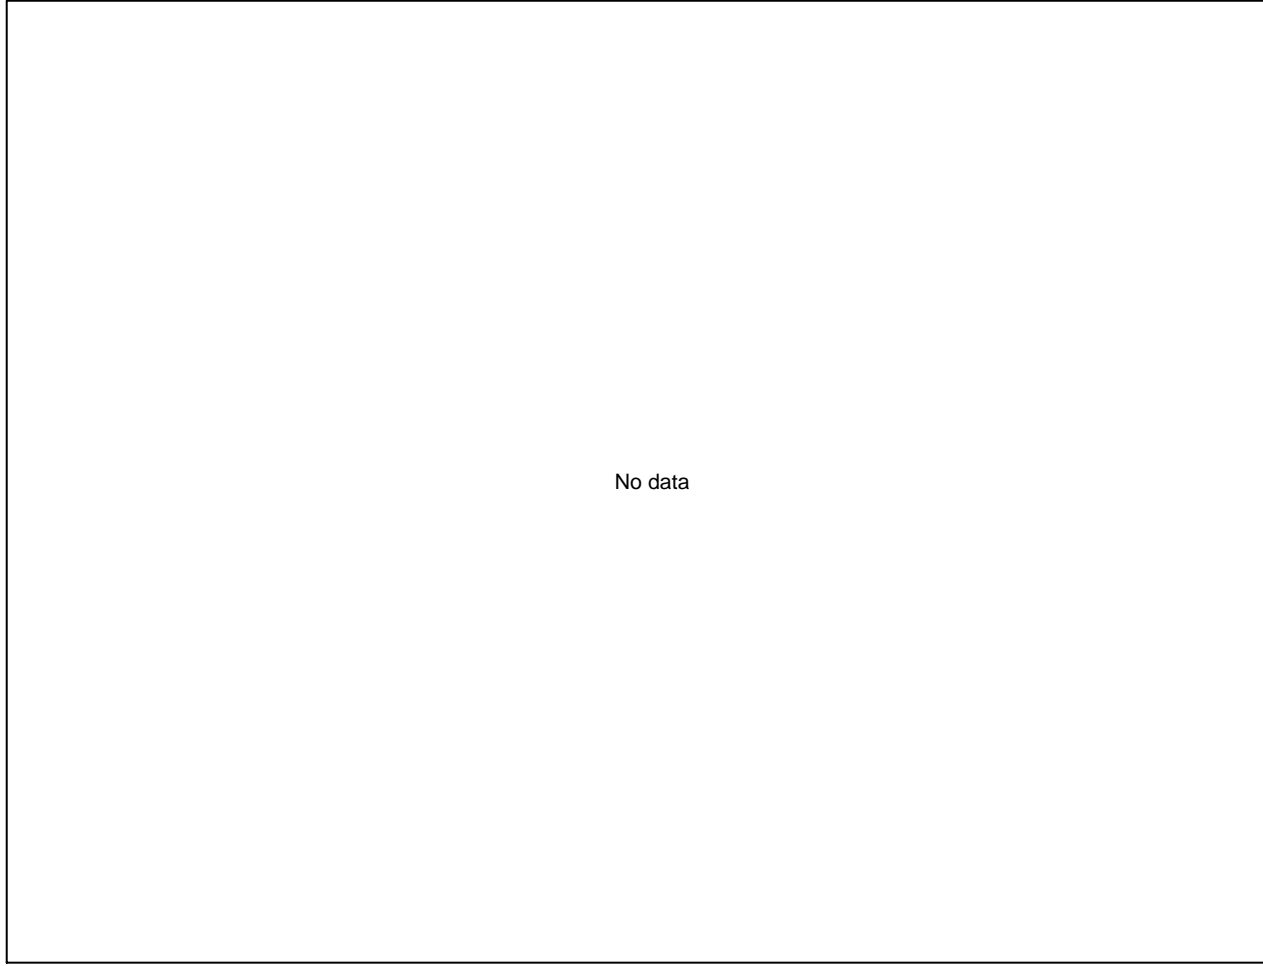

MRC Harwell

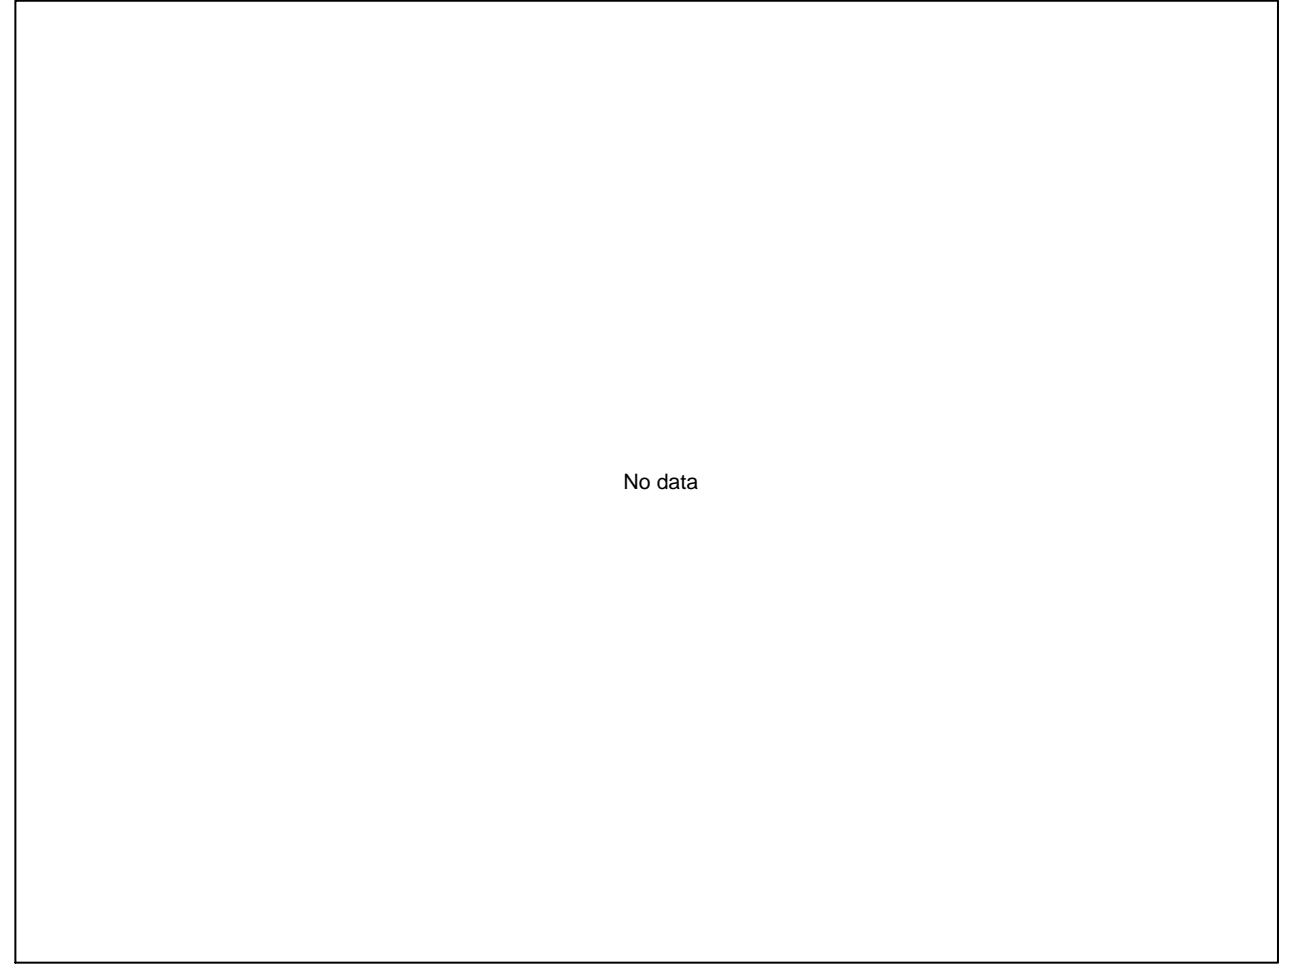

WTSI

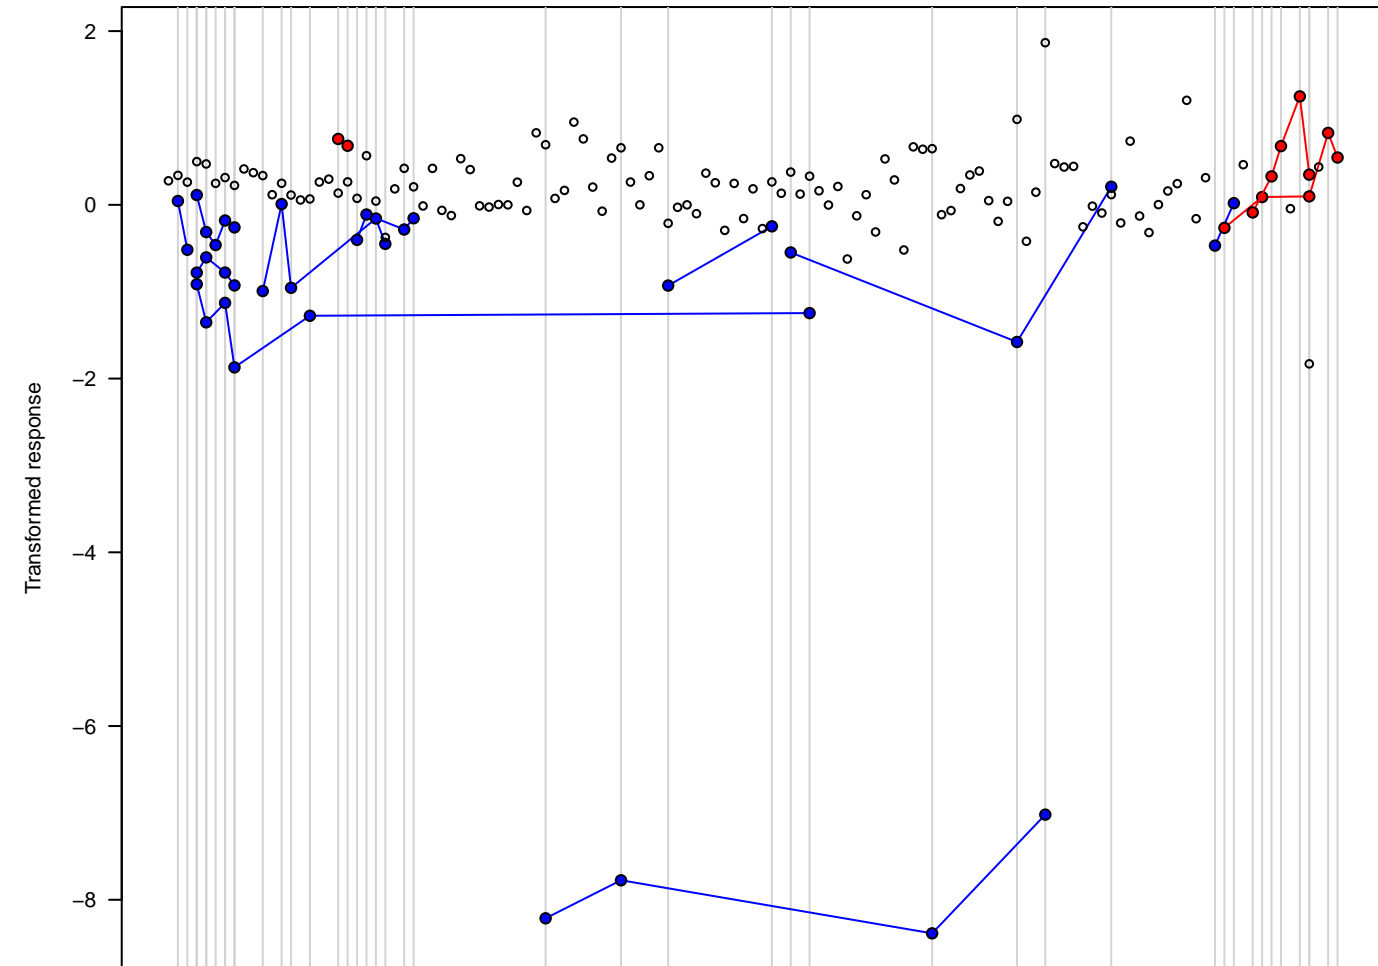

ICS

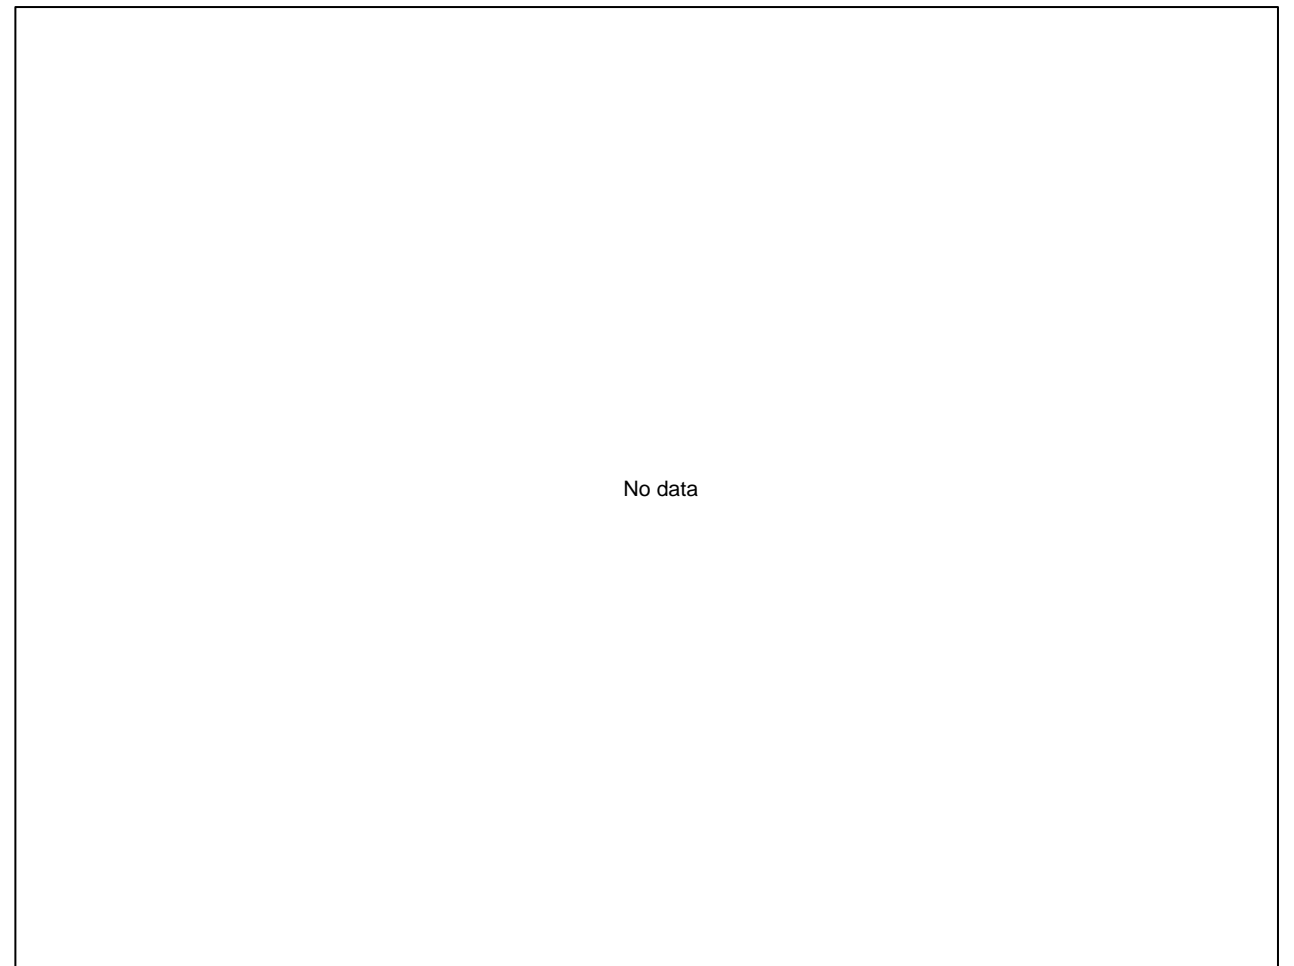

Tibia length  
(X-Ray)

HMGU

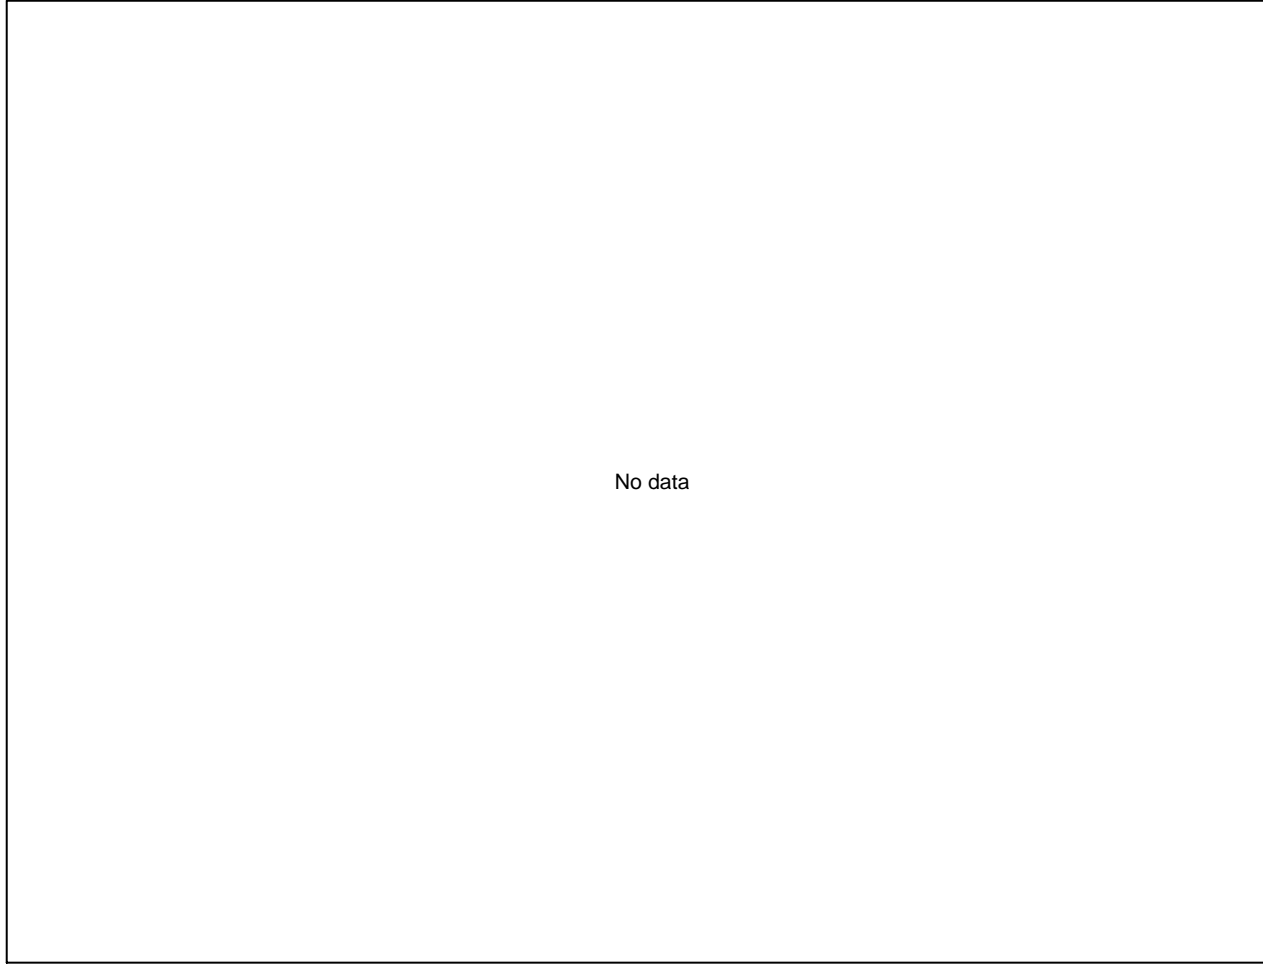

MRC Harwell

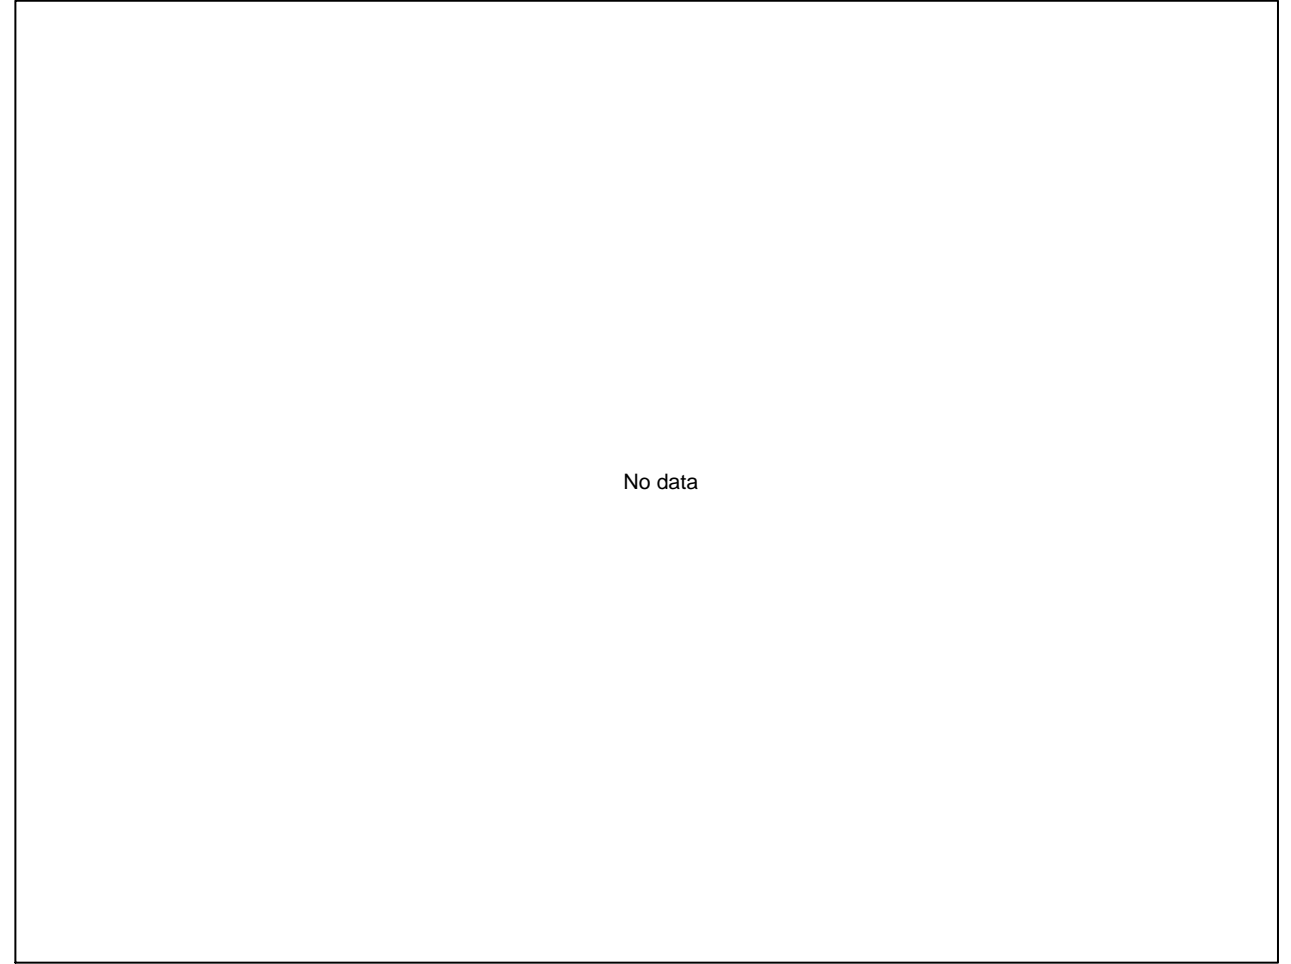

WTSI

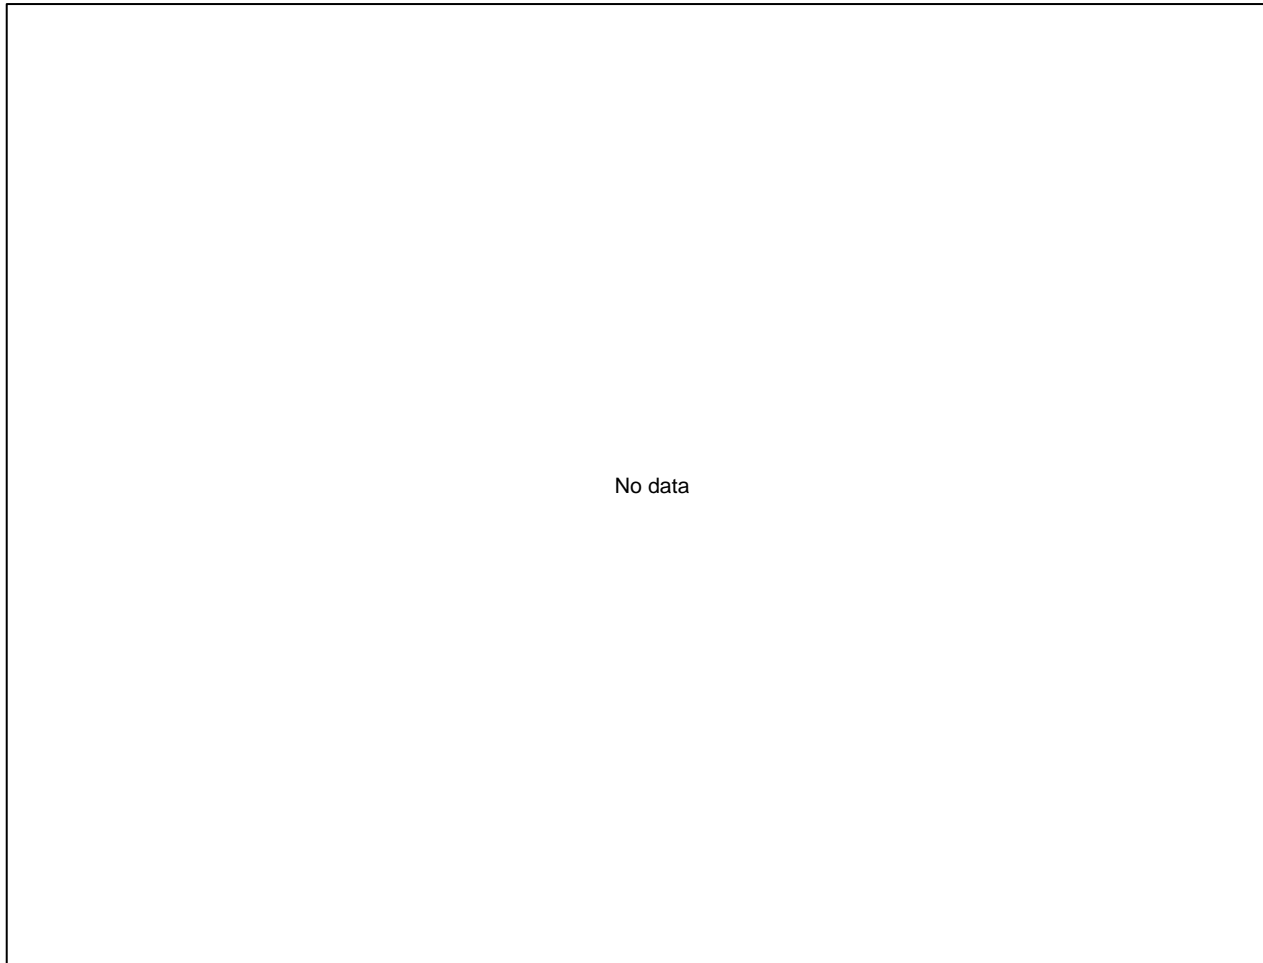

ICS

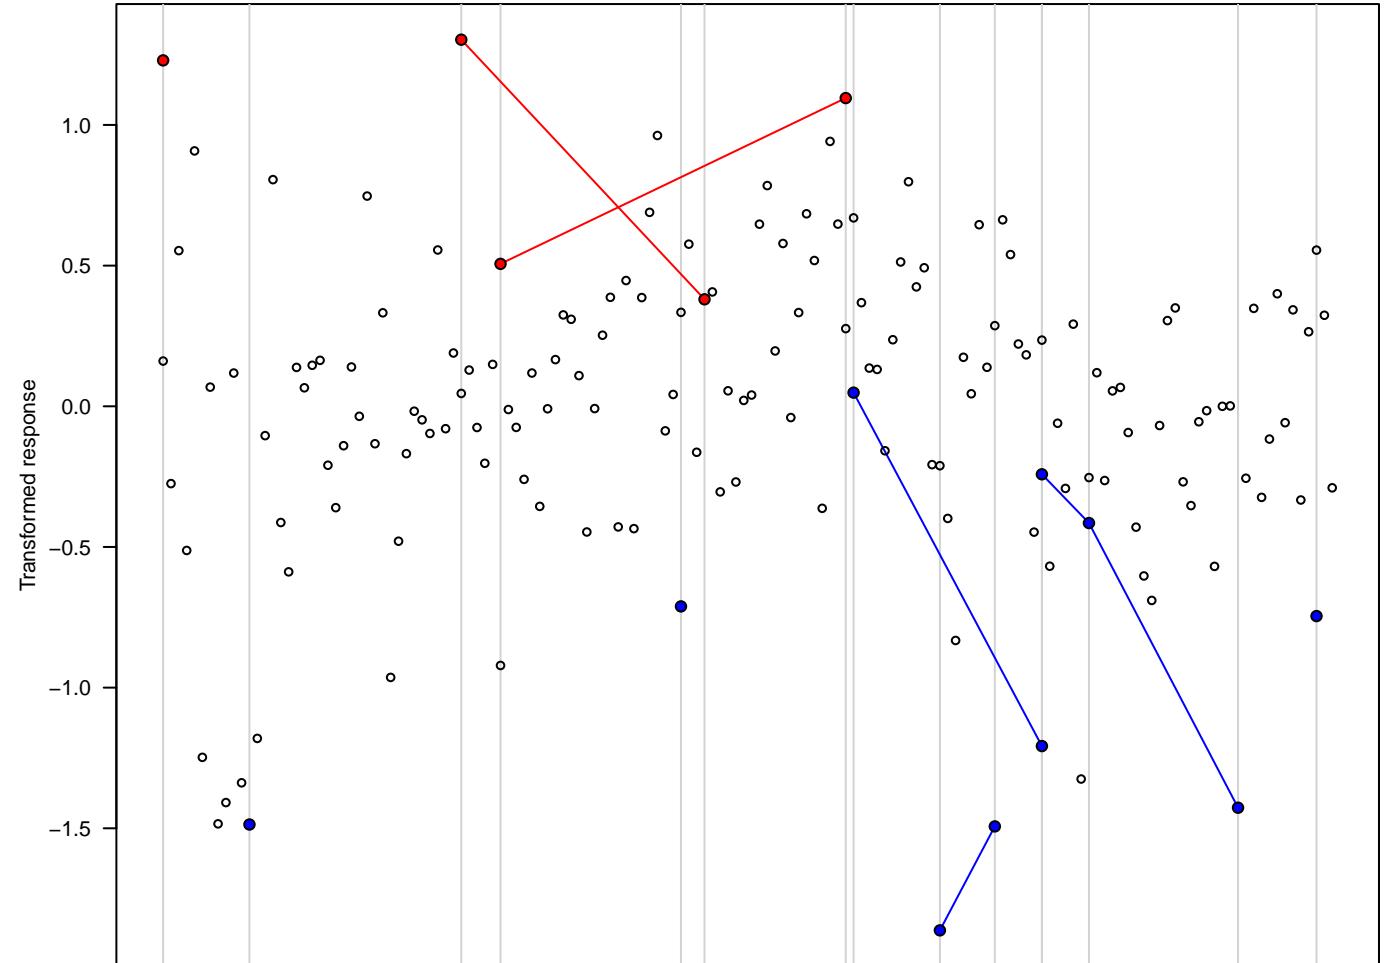



Whole arena resting time  
(Open-field)

HMGU

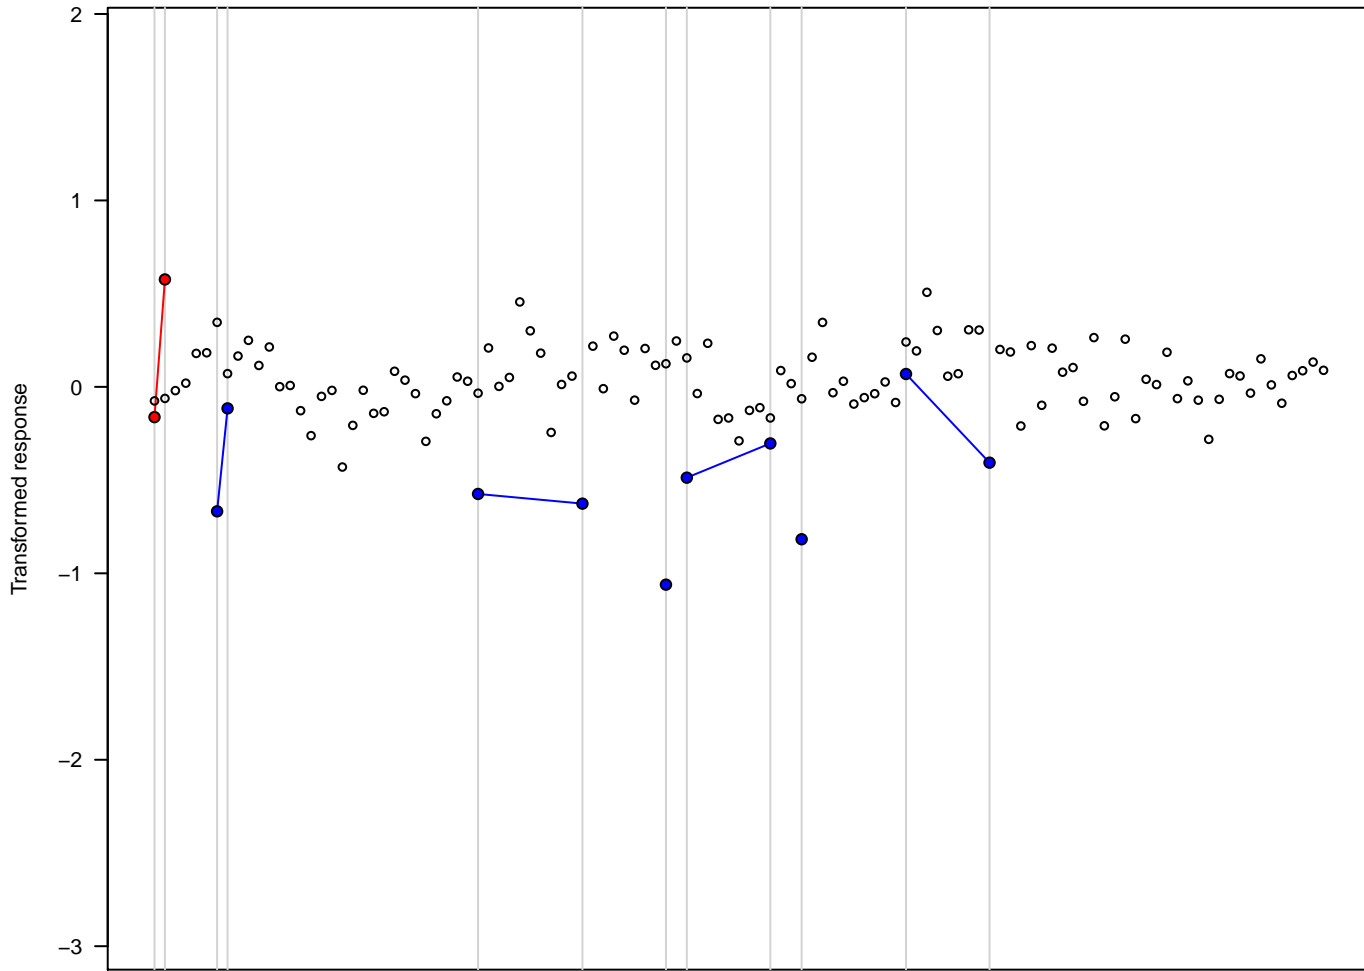

MRC Harwell

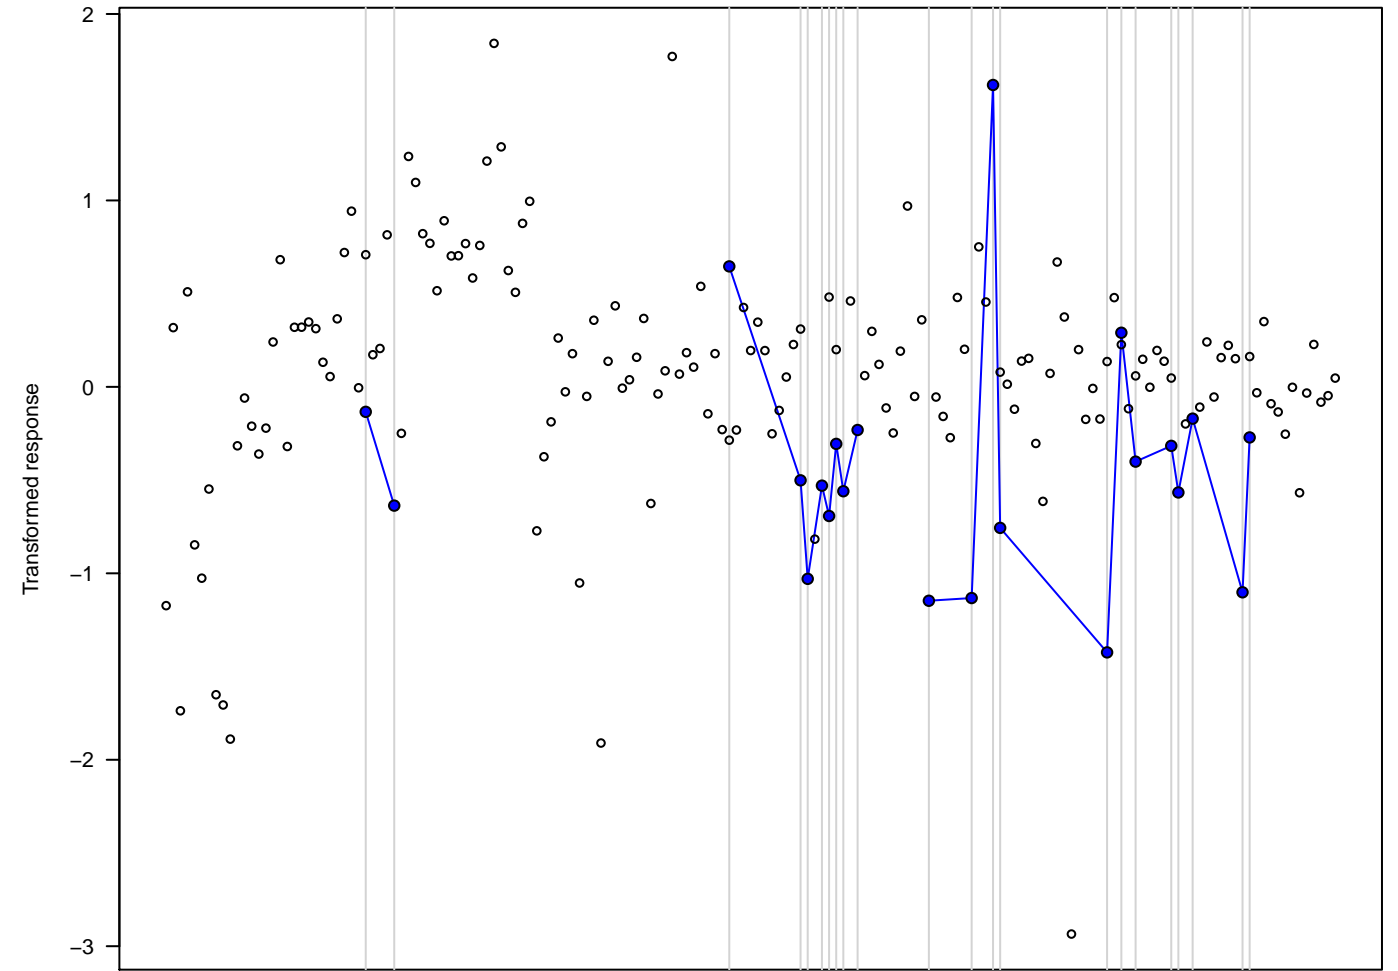

WTSI

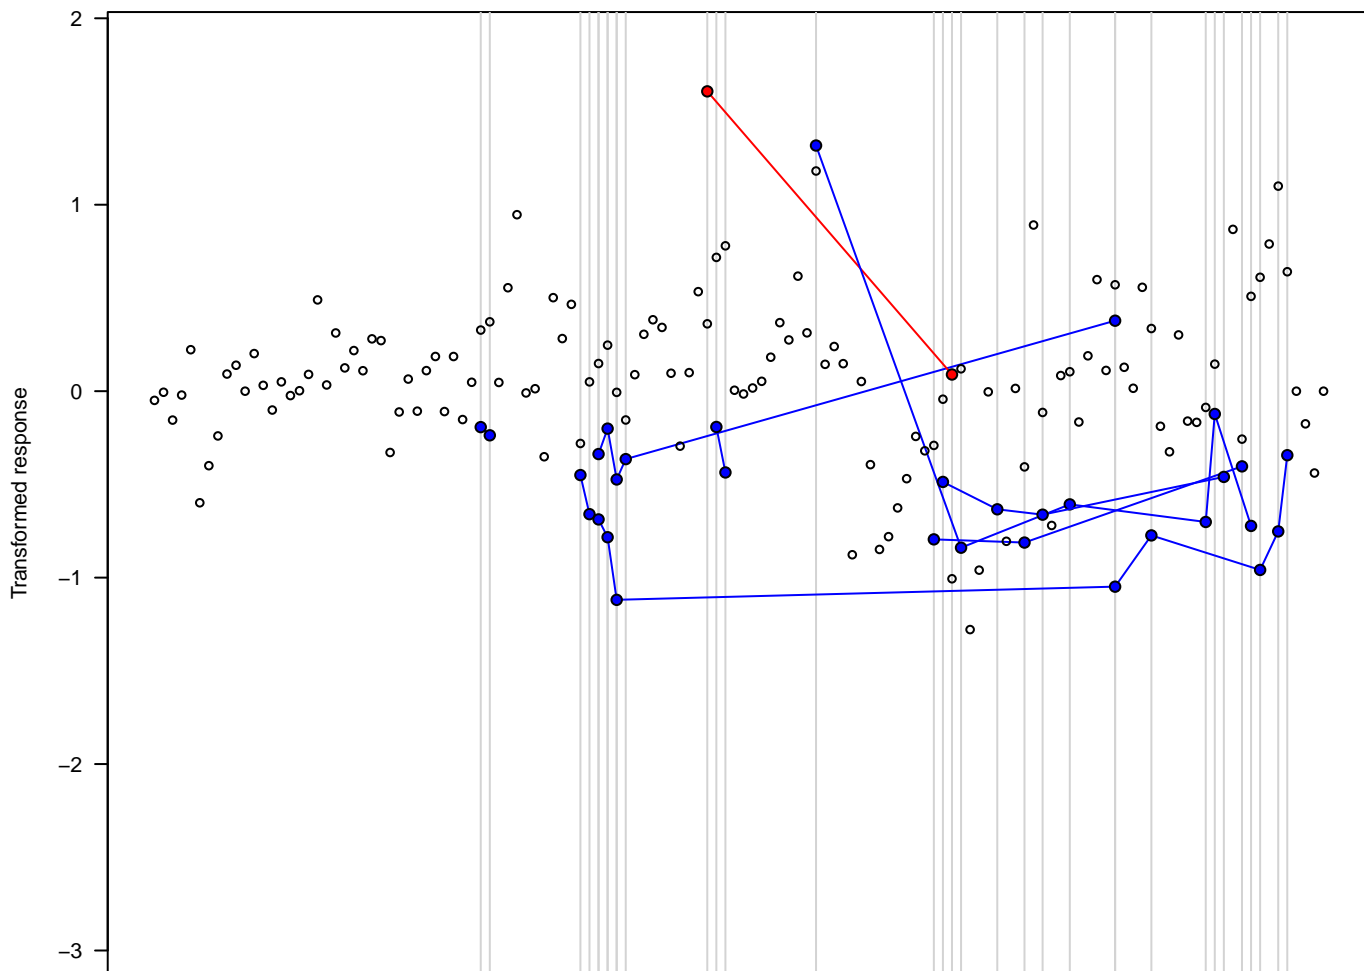

ICS

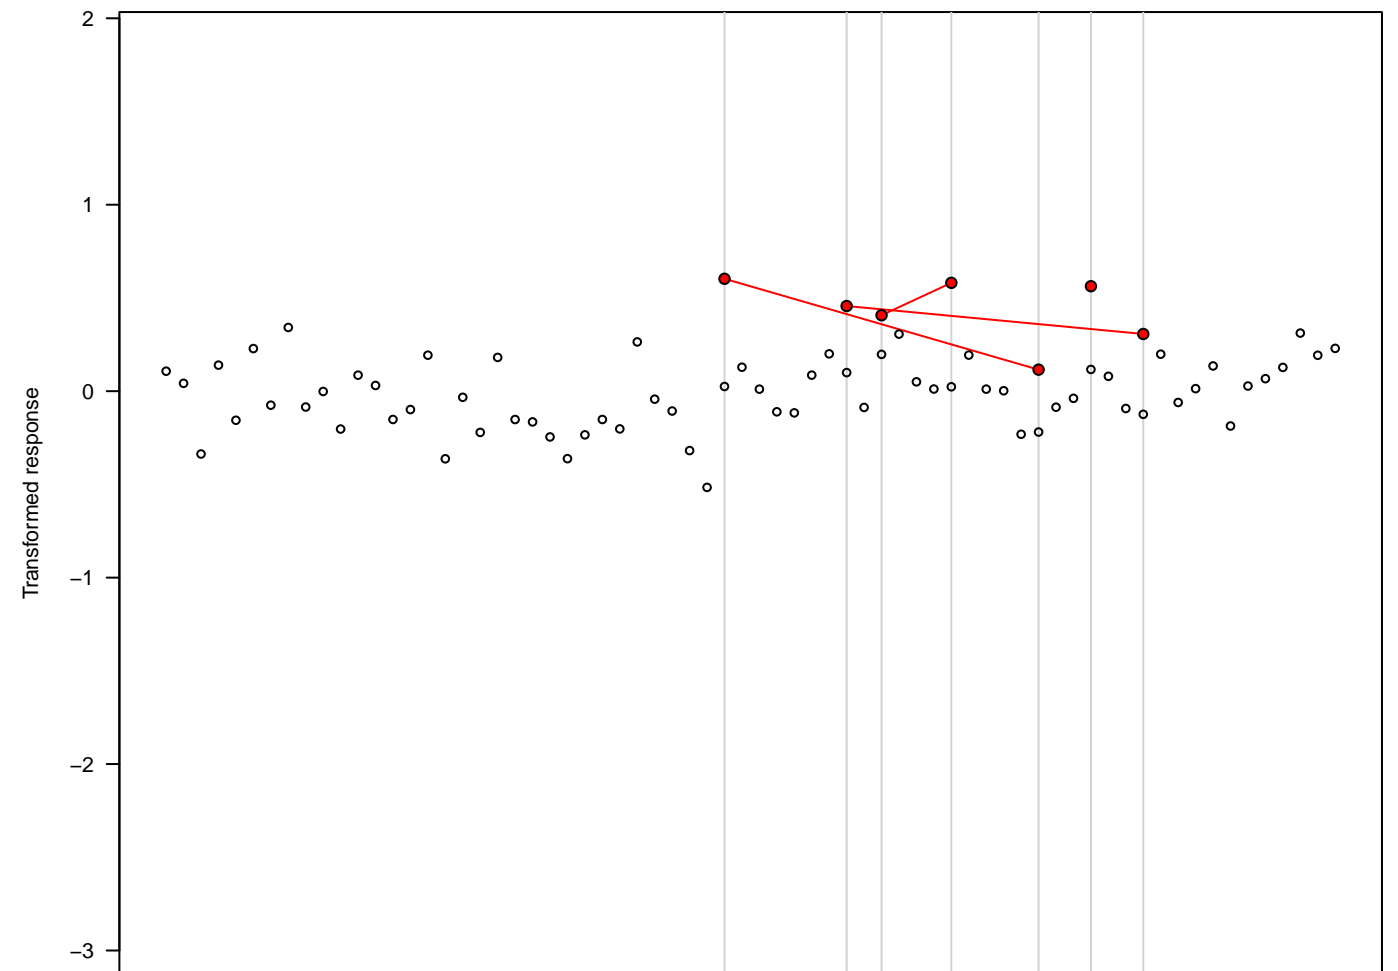

Whole arena average speed  
(Open-field)

HMGU

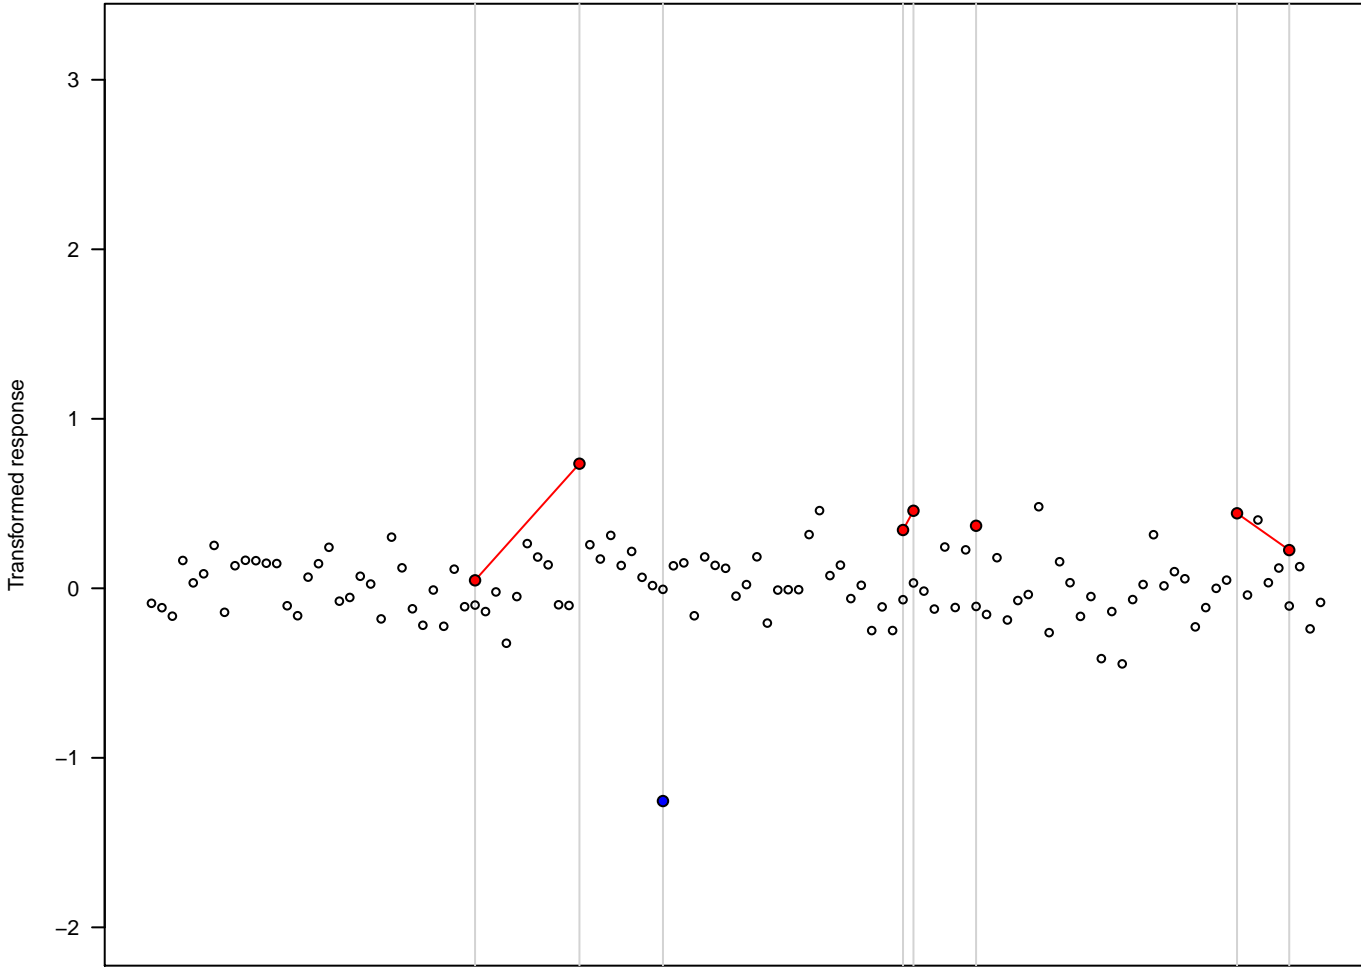

MRC Harwell

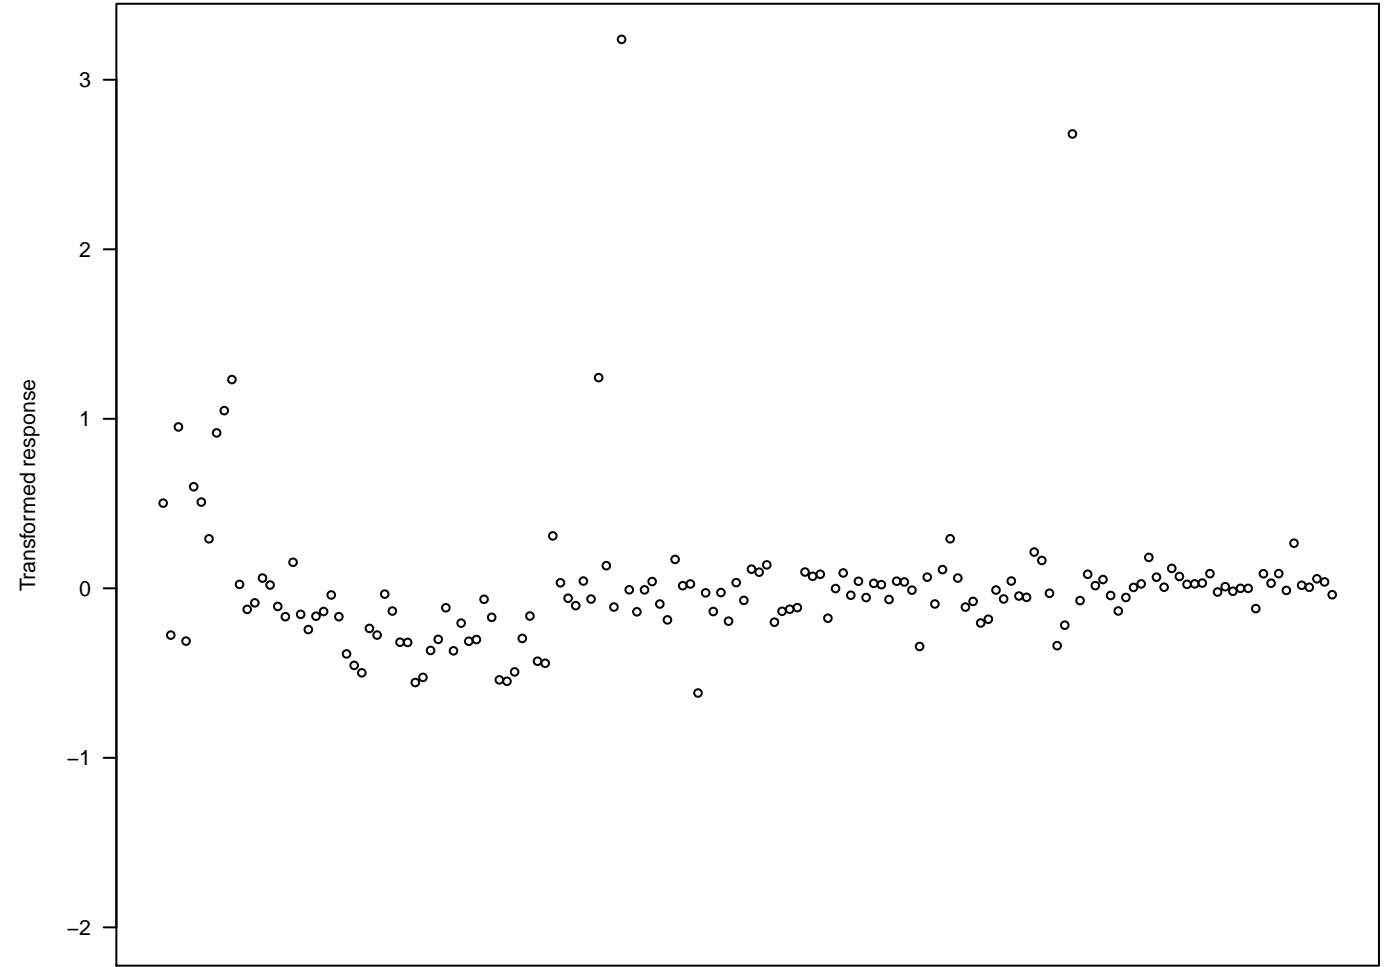

WTSI

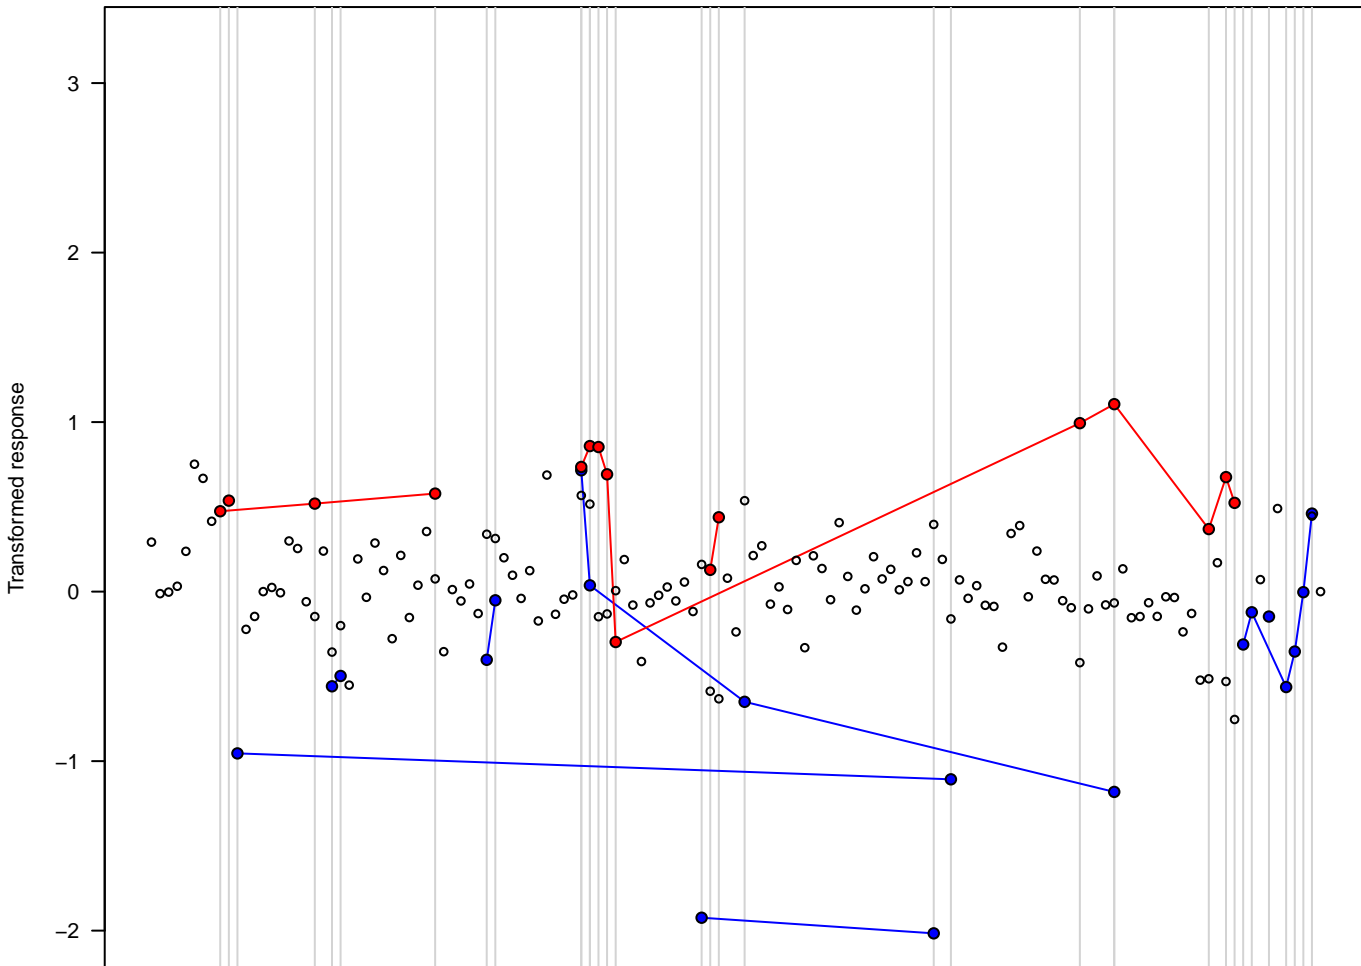

ICS

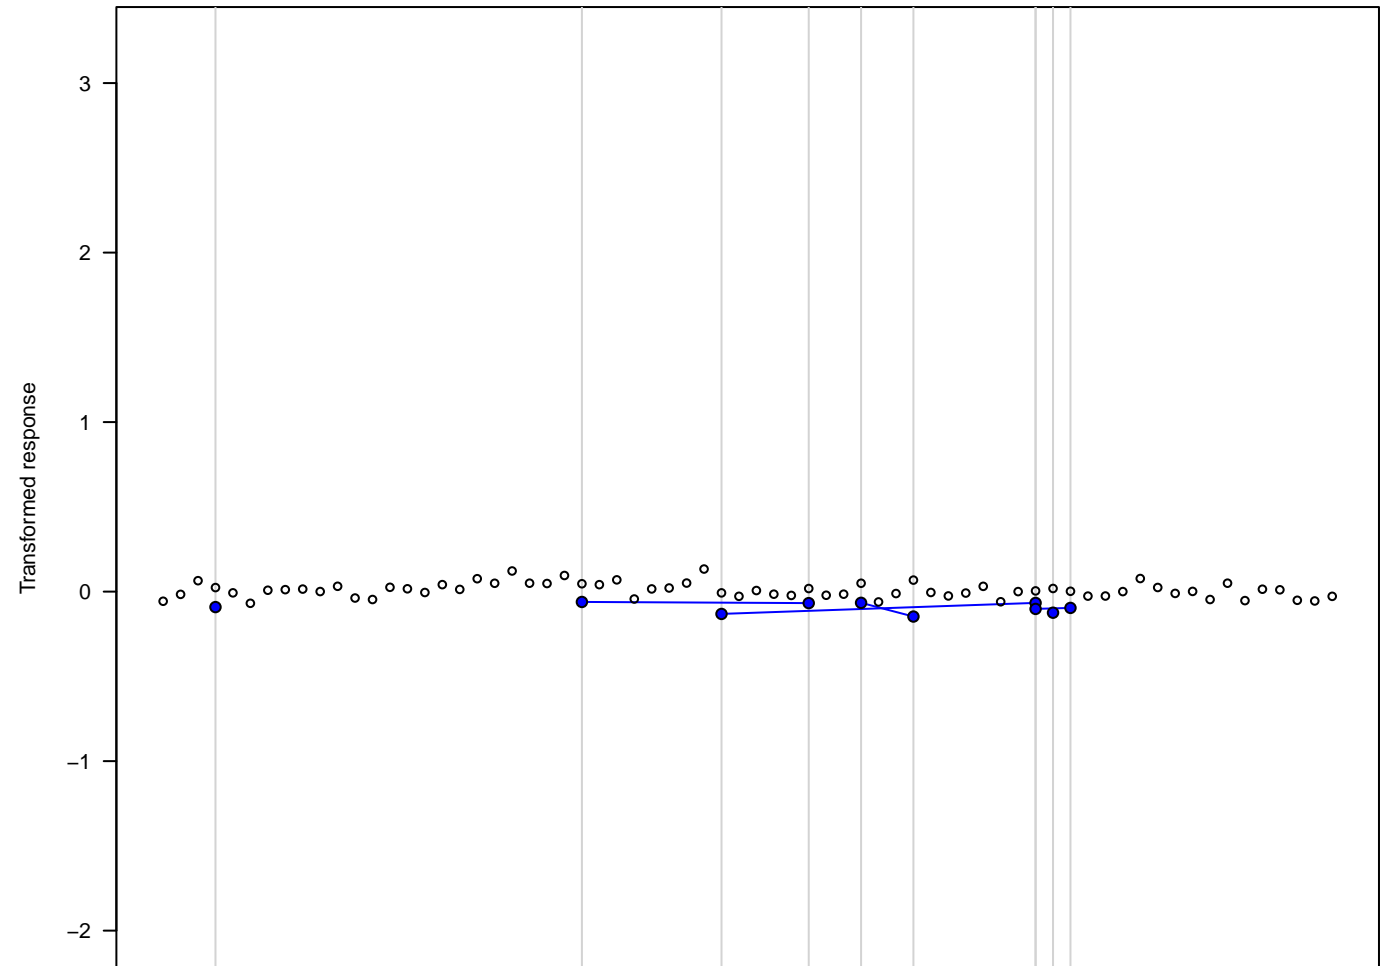

Periphery distance travelled  
(Open-field)

HMGU

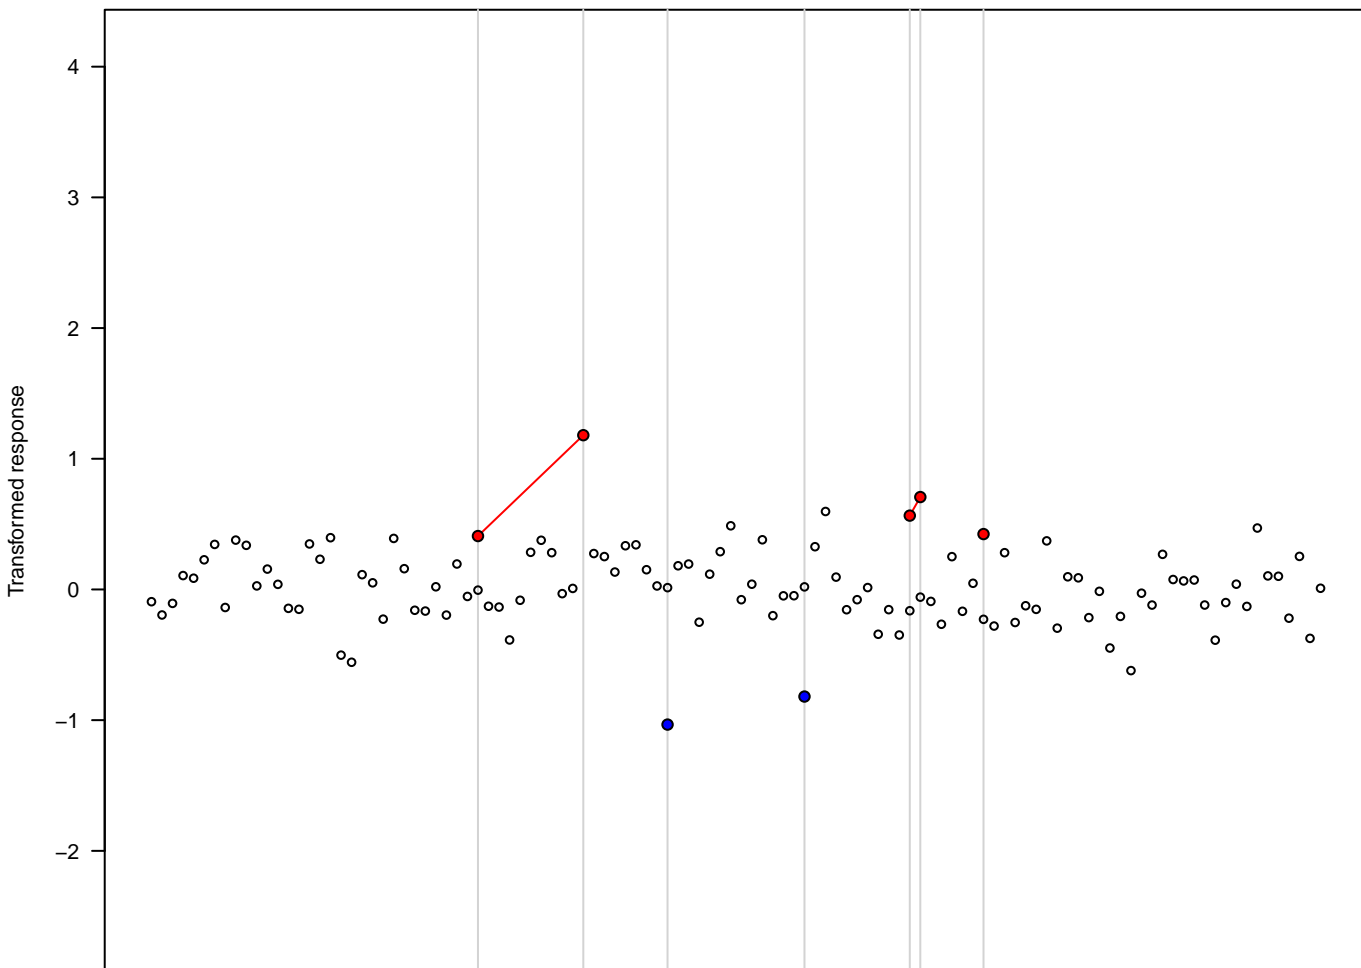

MRC Harwell

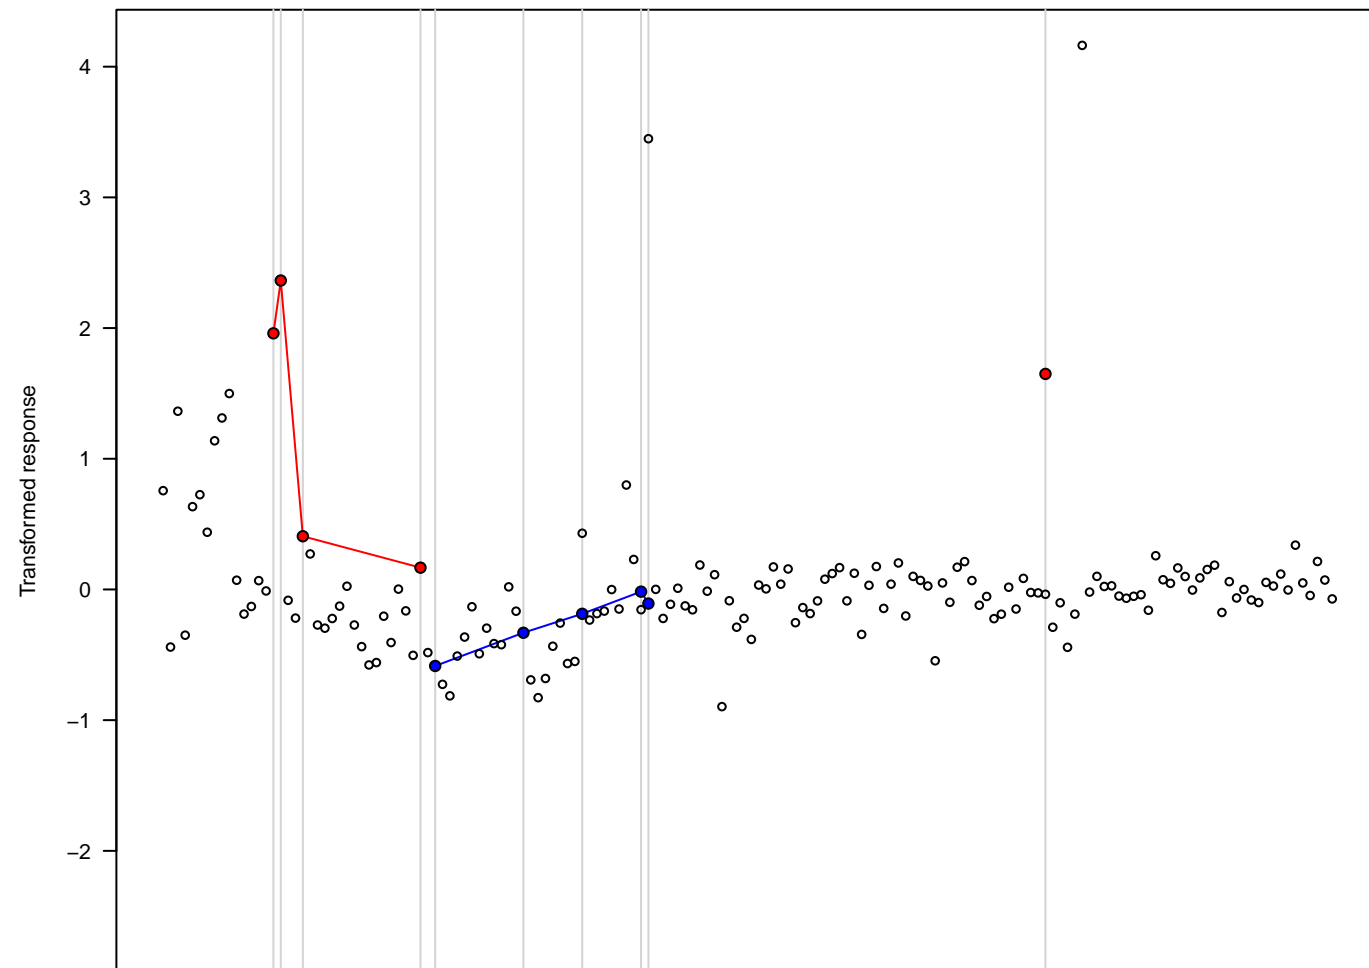

WTSI

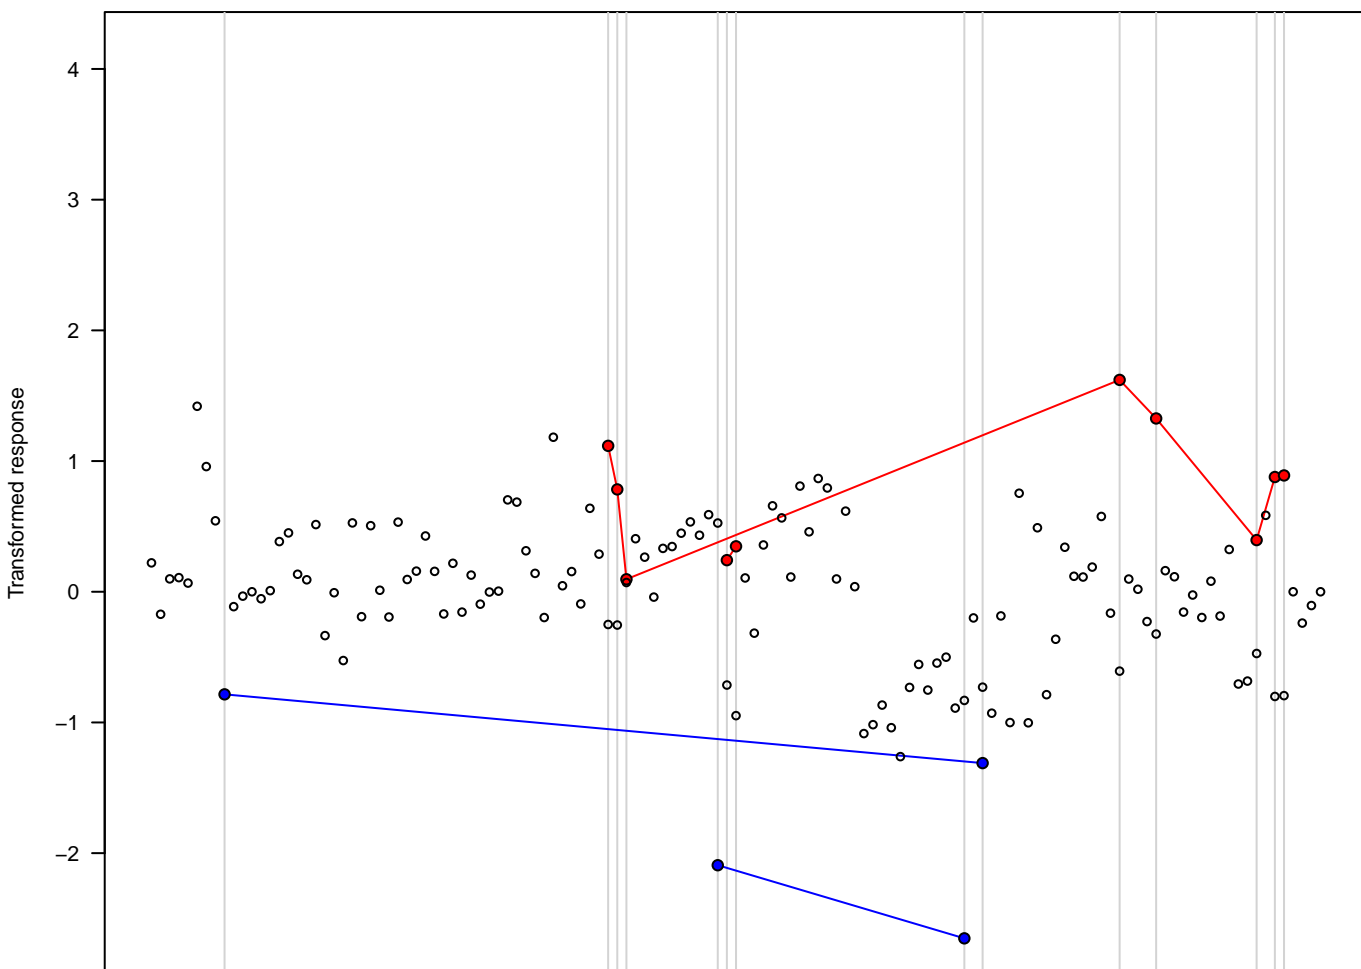

ICS

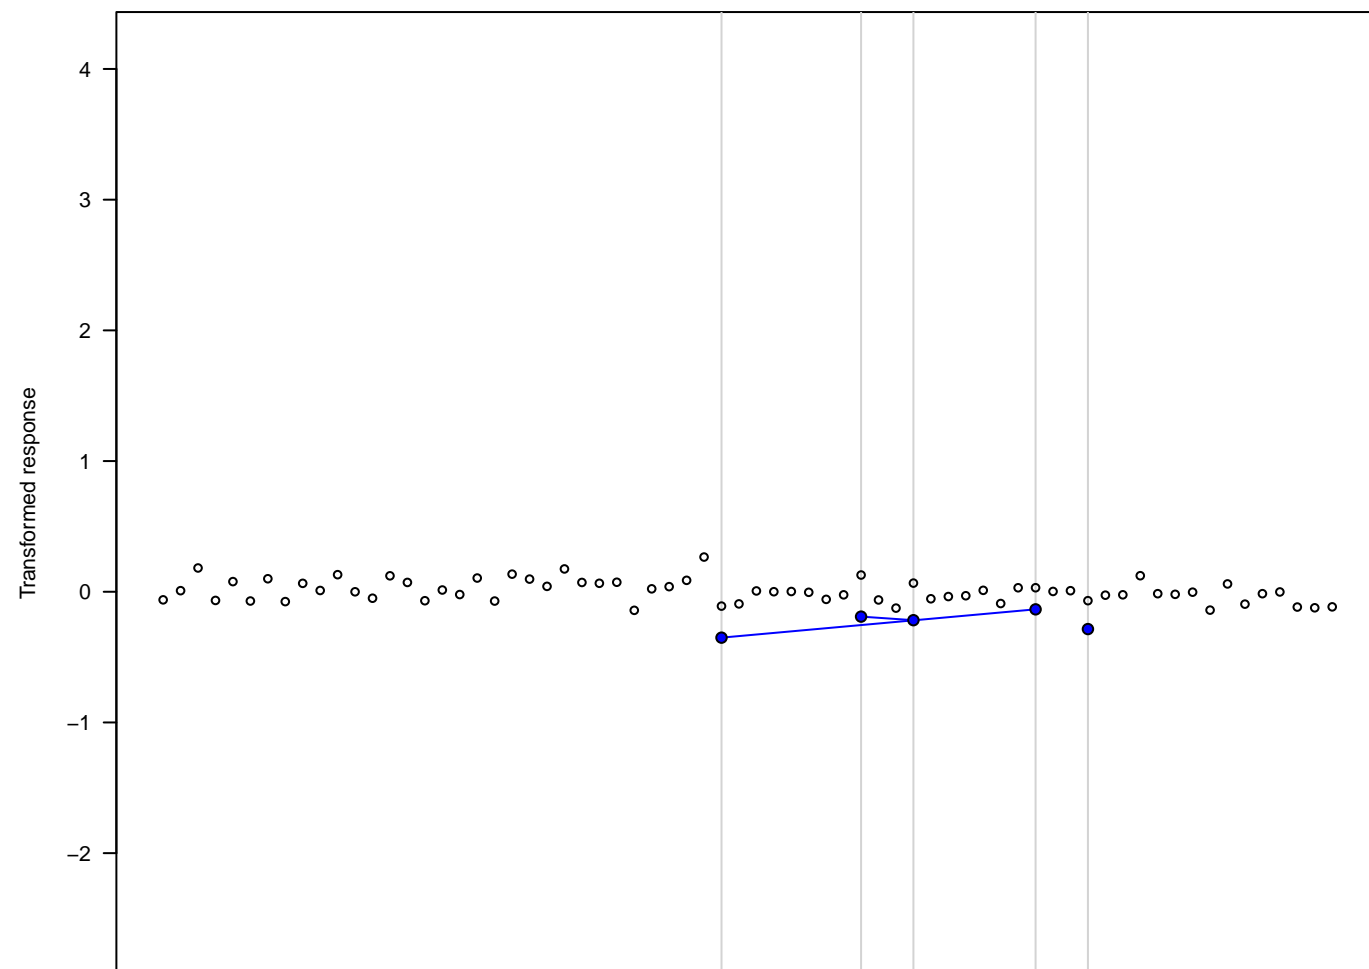

Periphery resting time  
(Open-field)

HMGU

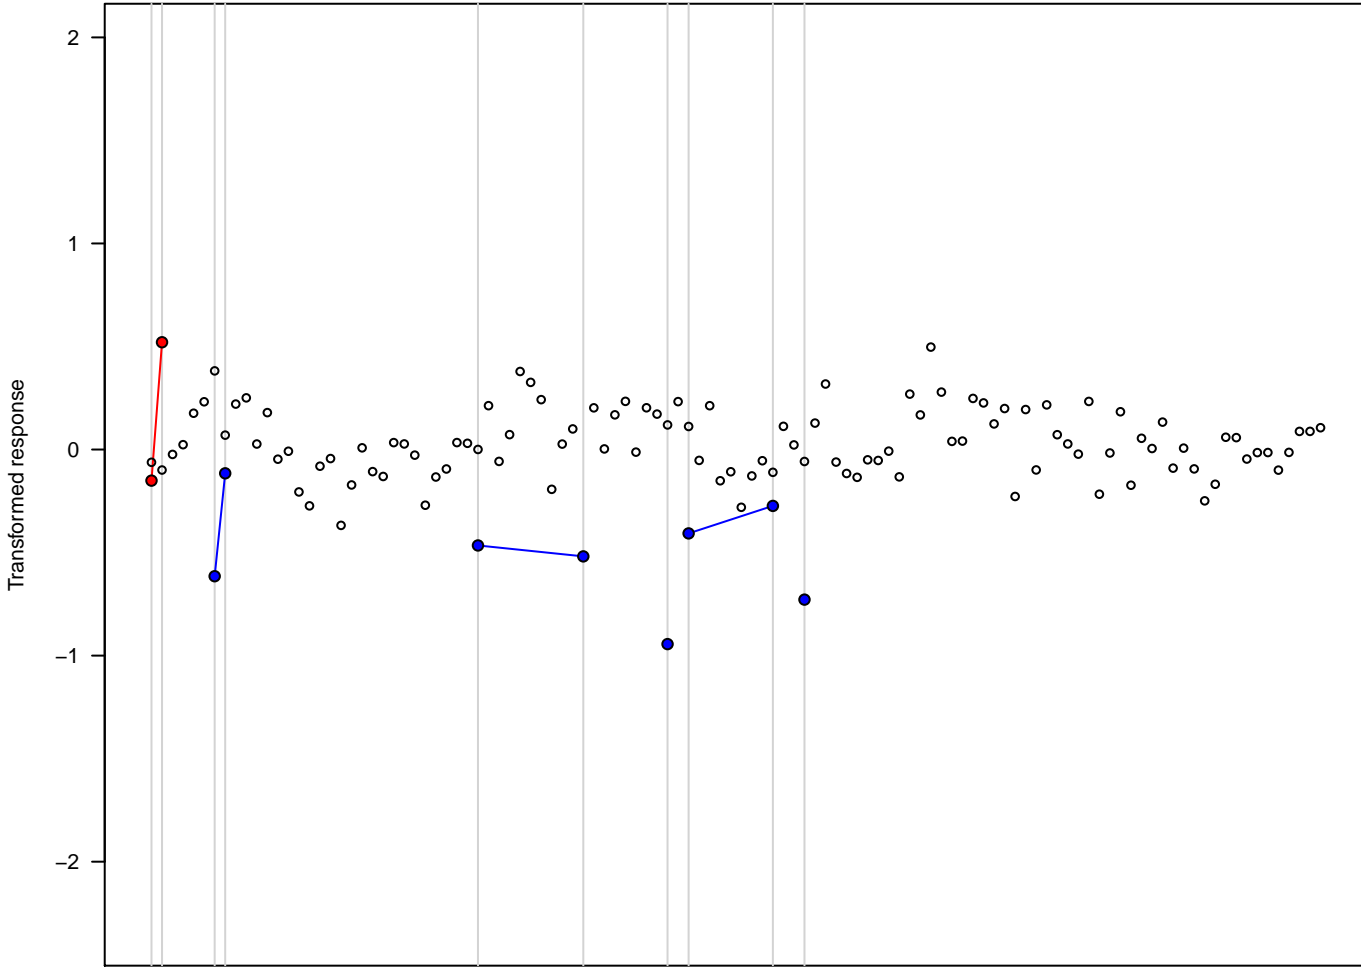

MRC Harwell

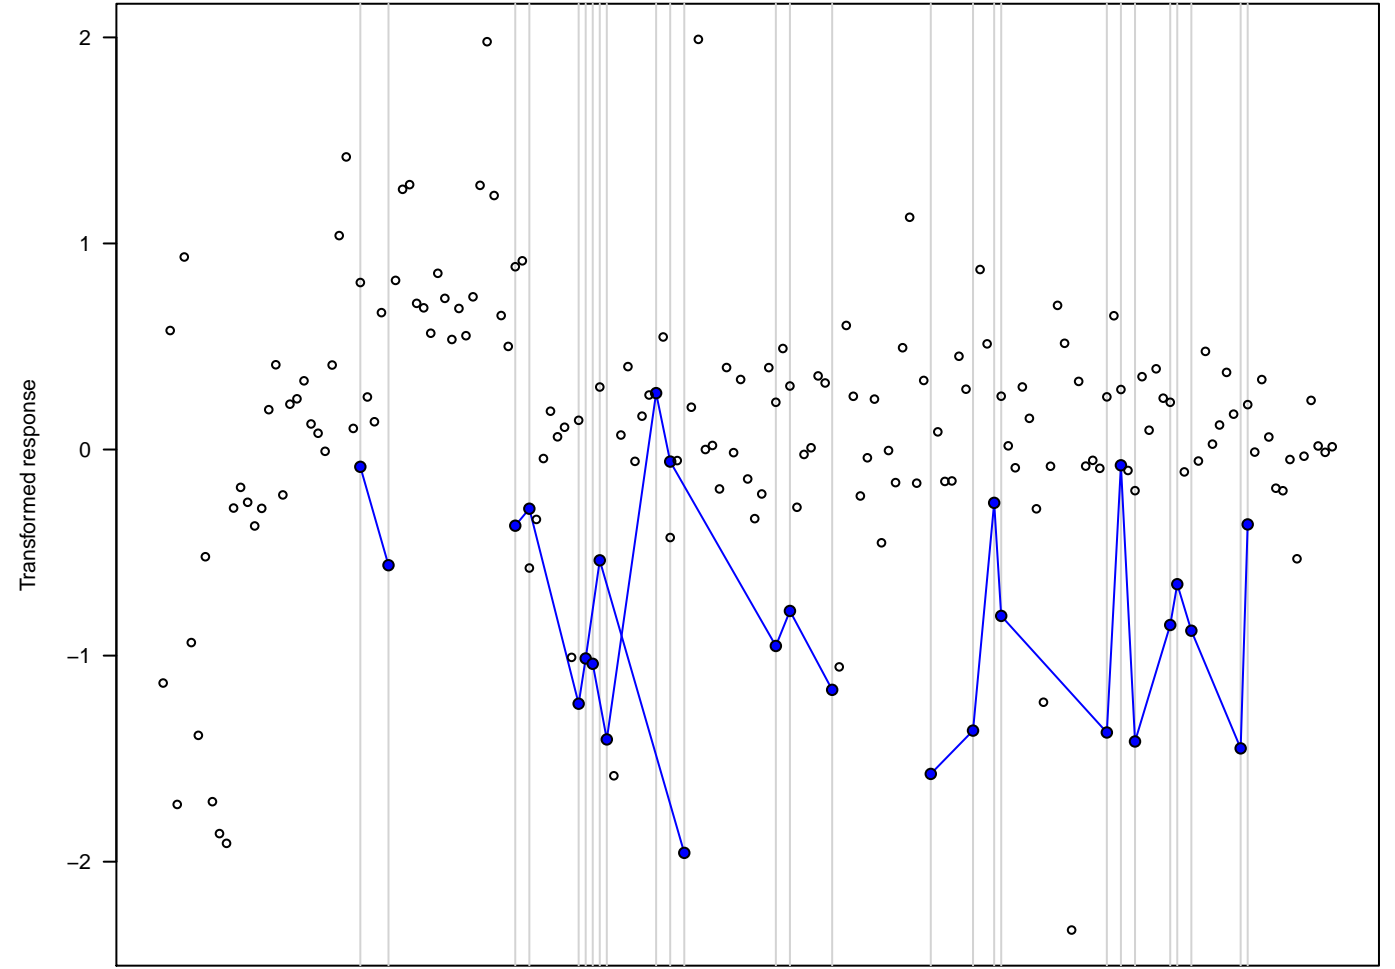

WTSI

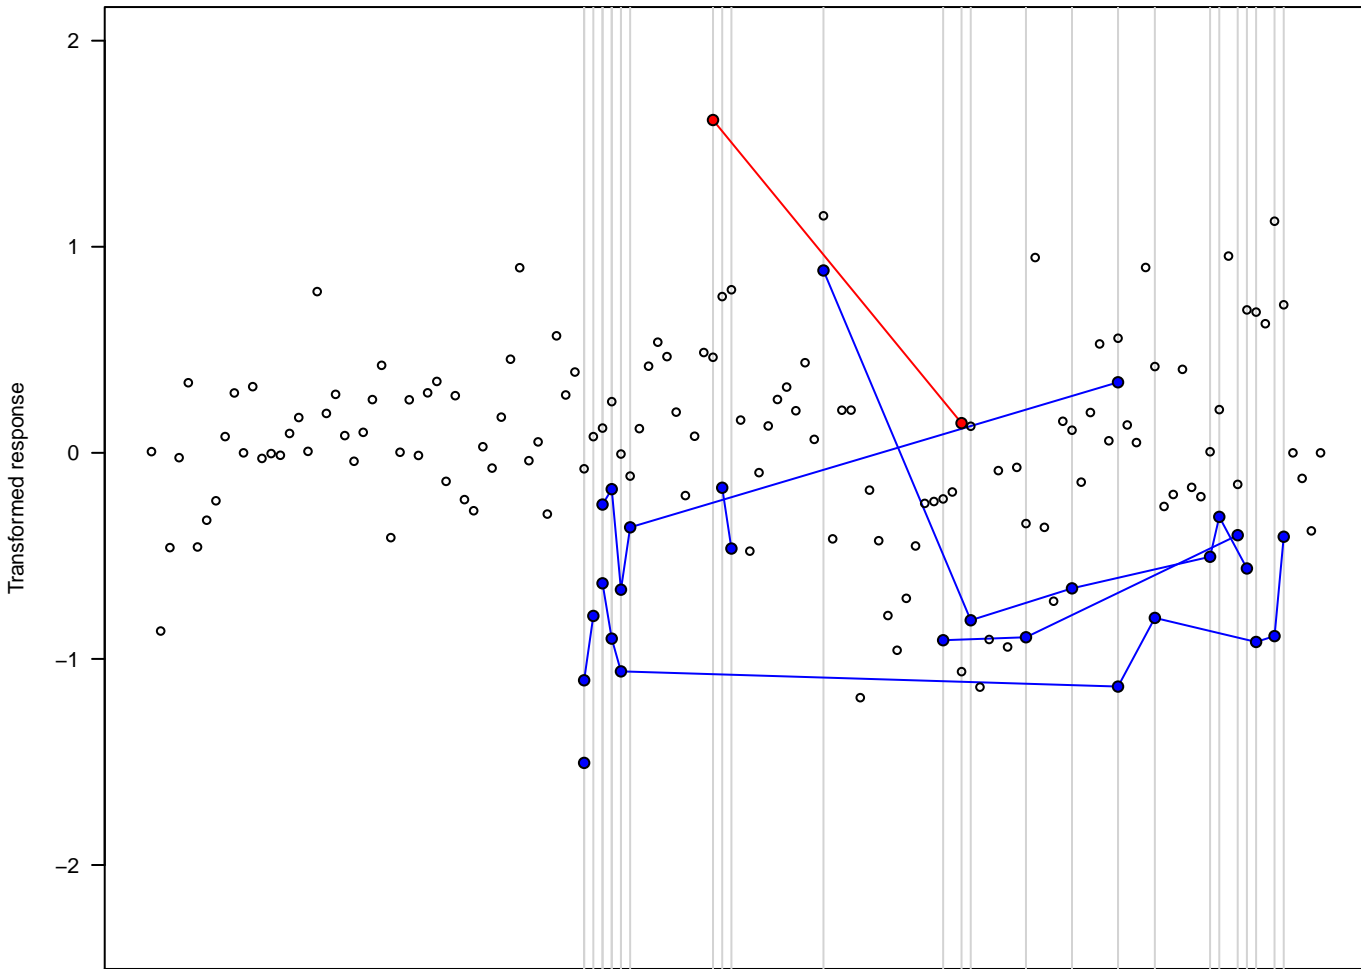

ICS

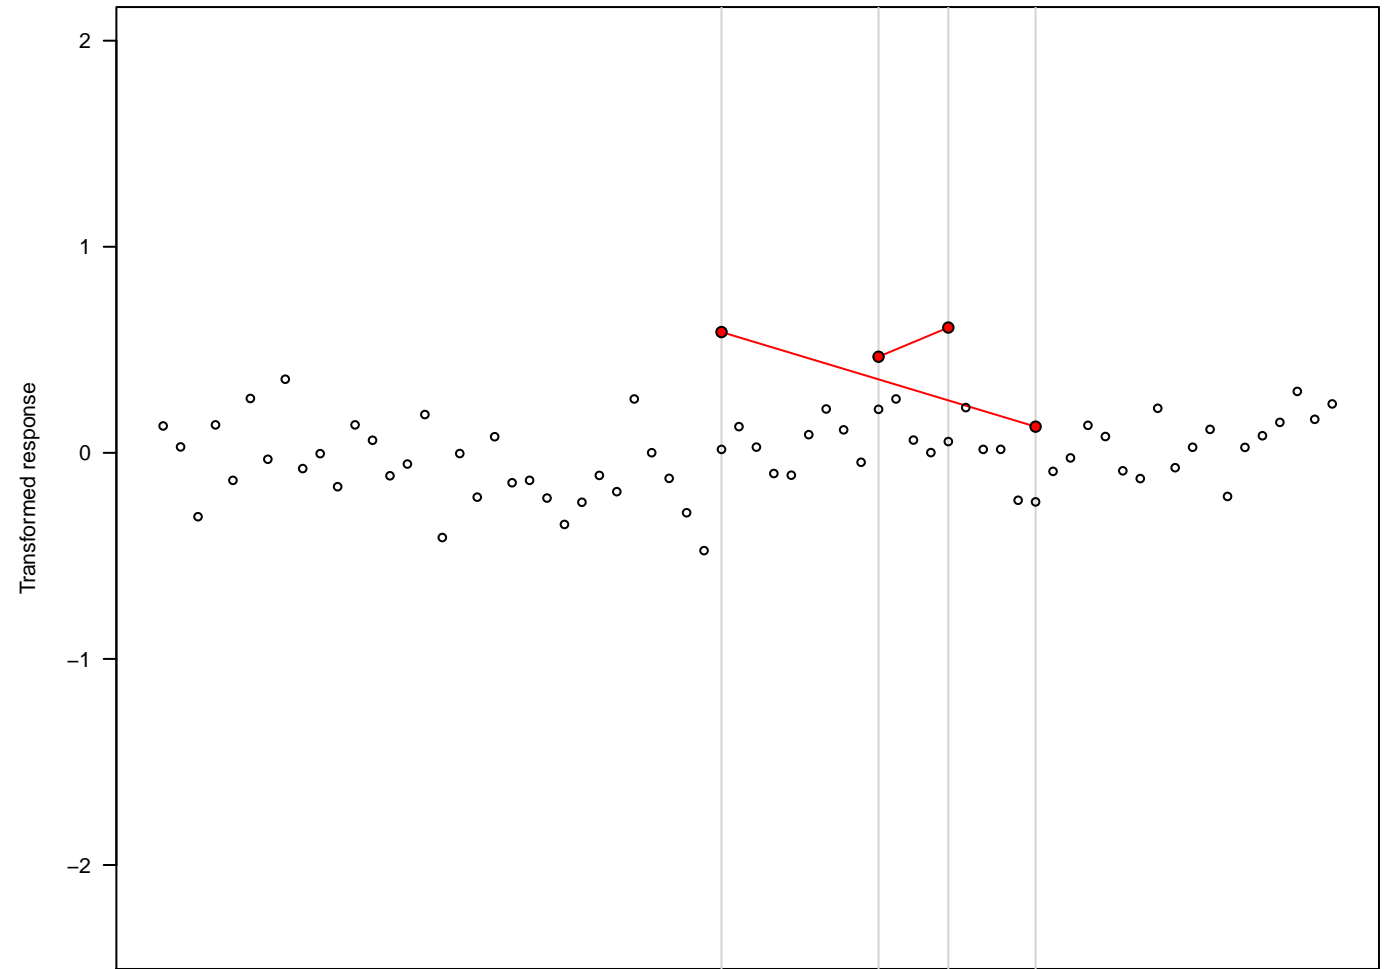

Periphery perennence time  
(Open-field)

HMGU

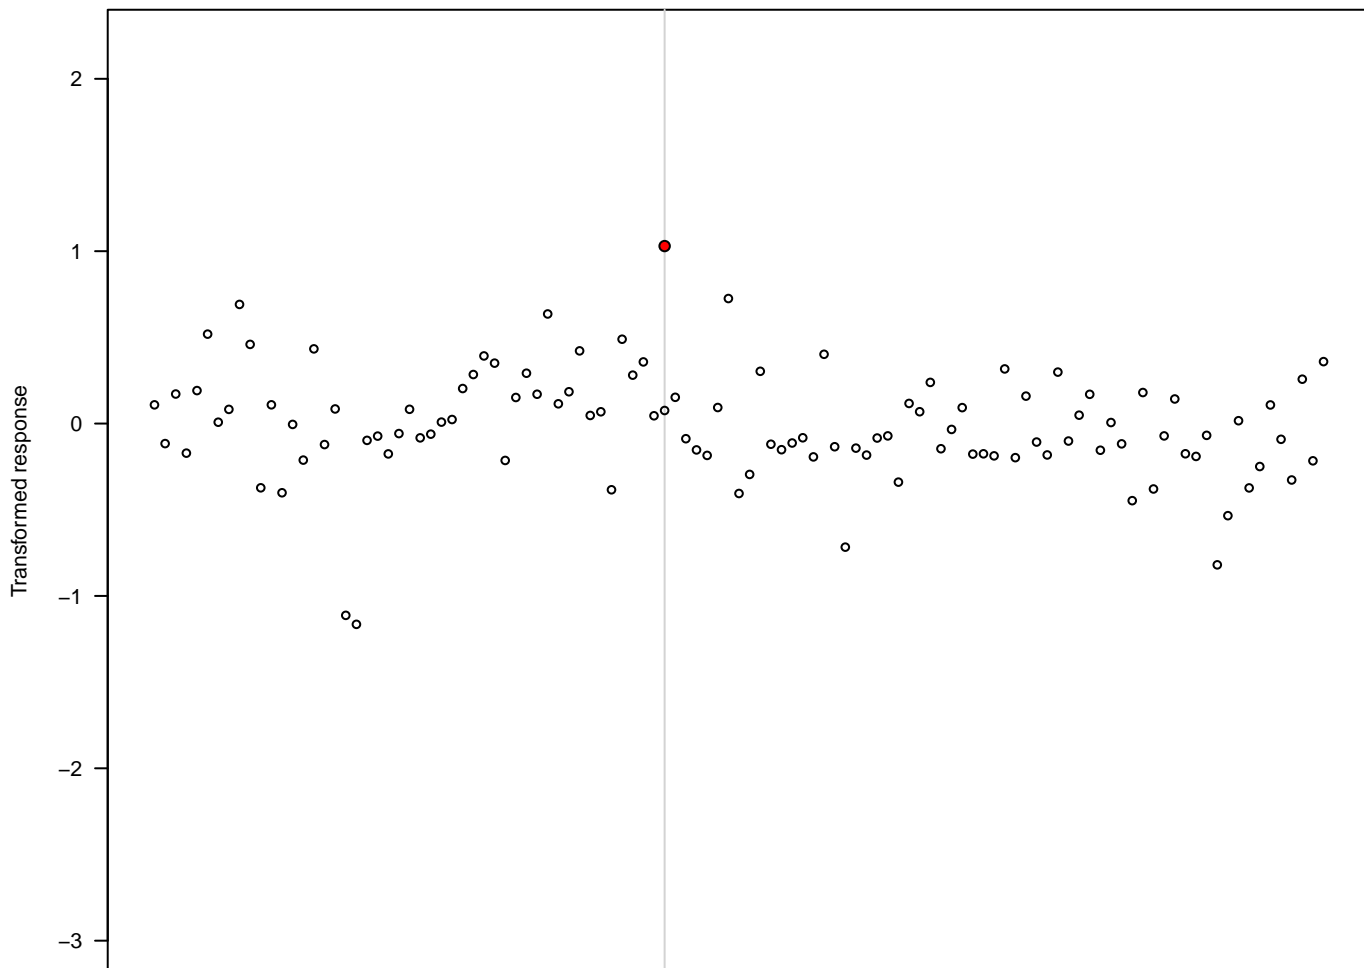

MRC Harwell

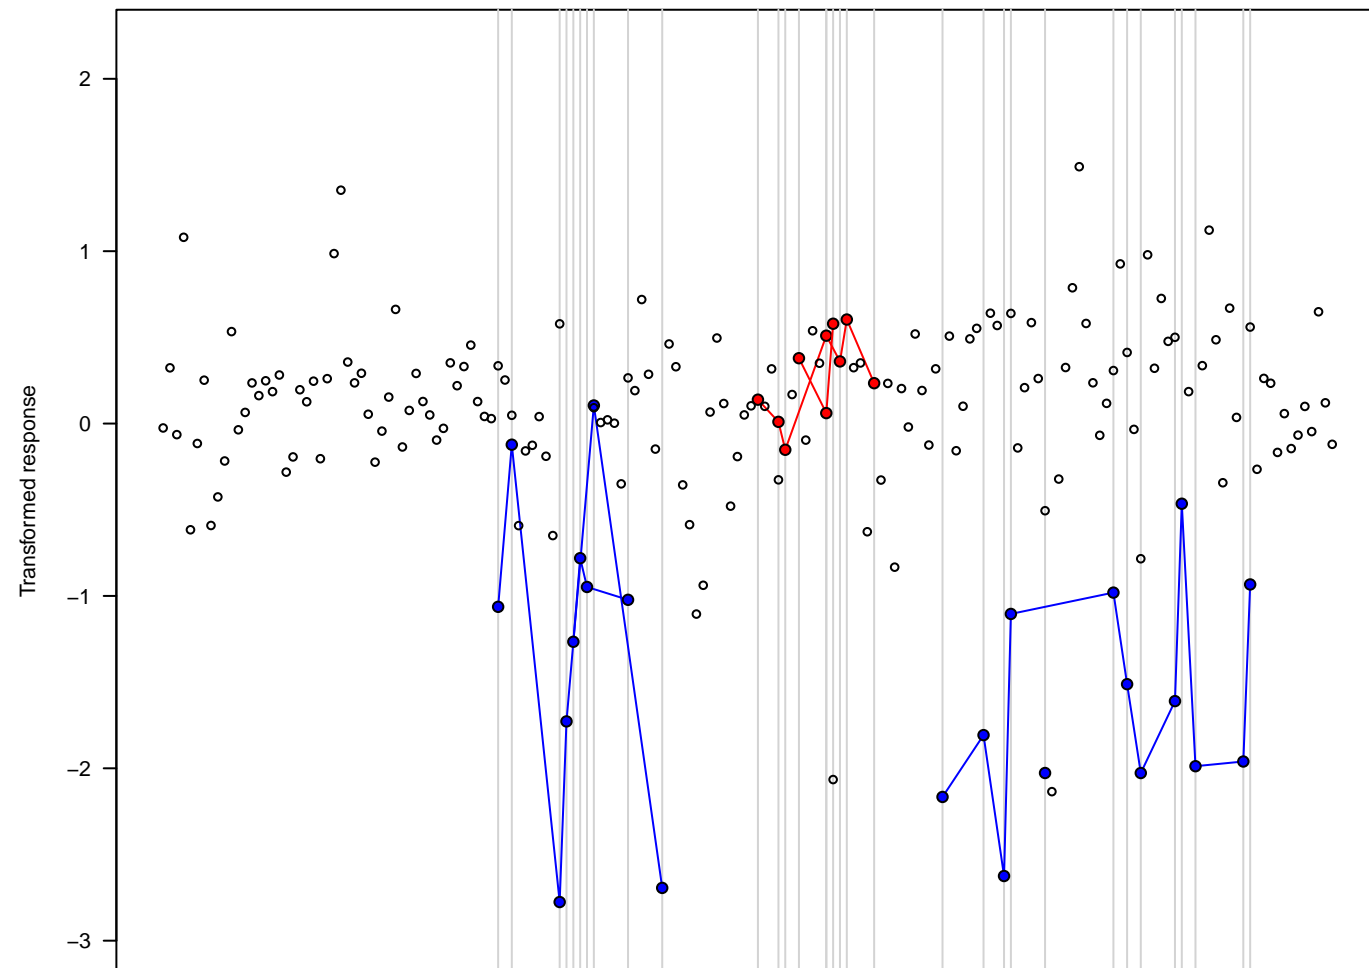

WTSI

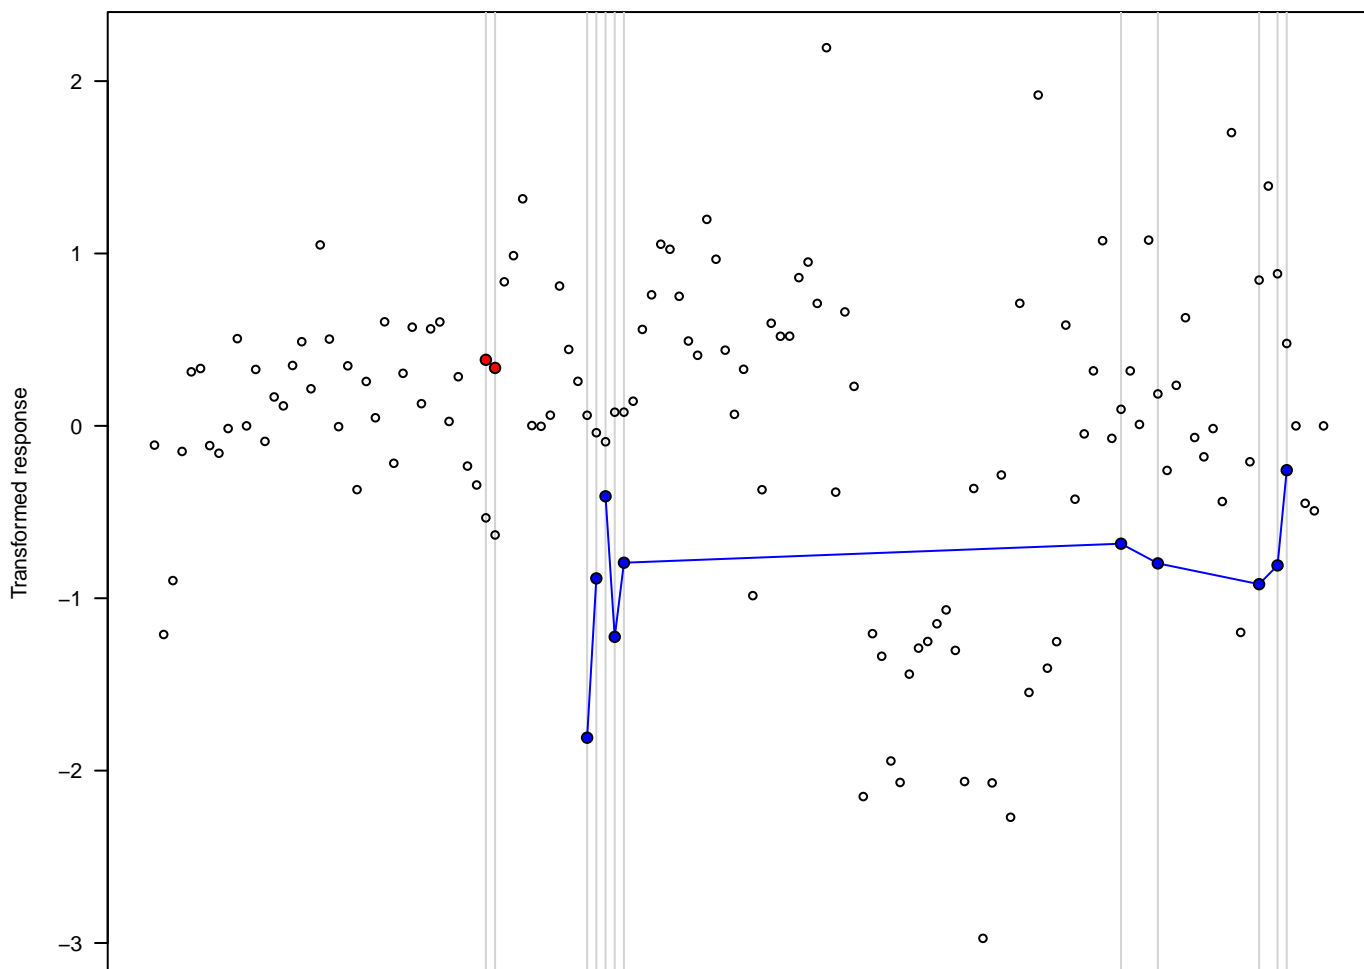

ICS

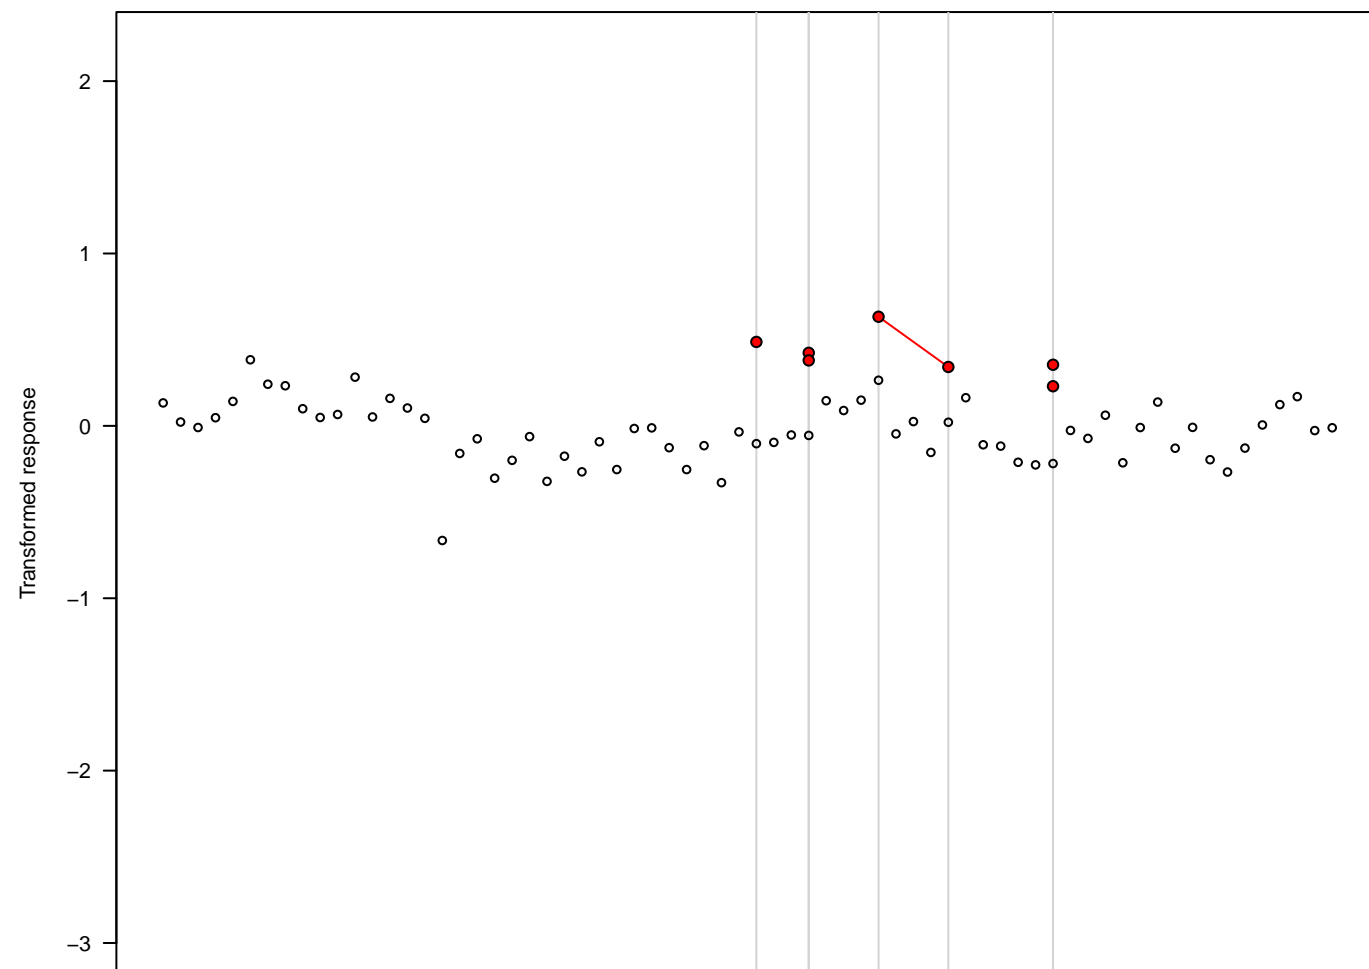

Periphery average speed  
(Open-field)

HMGU

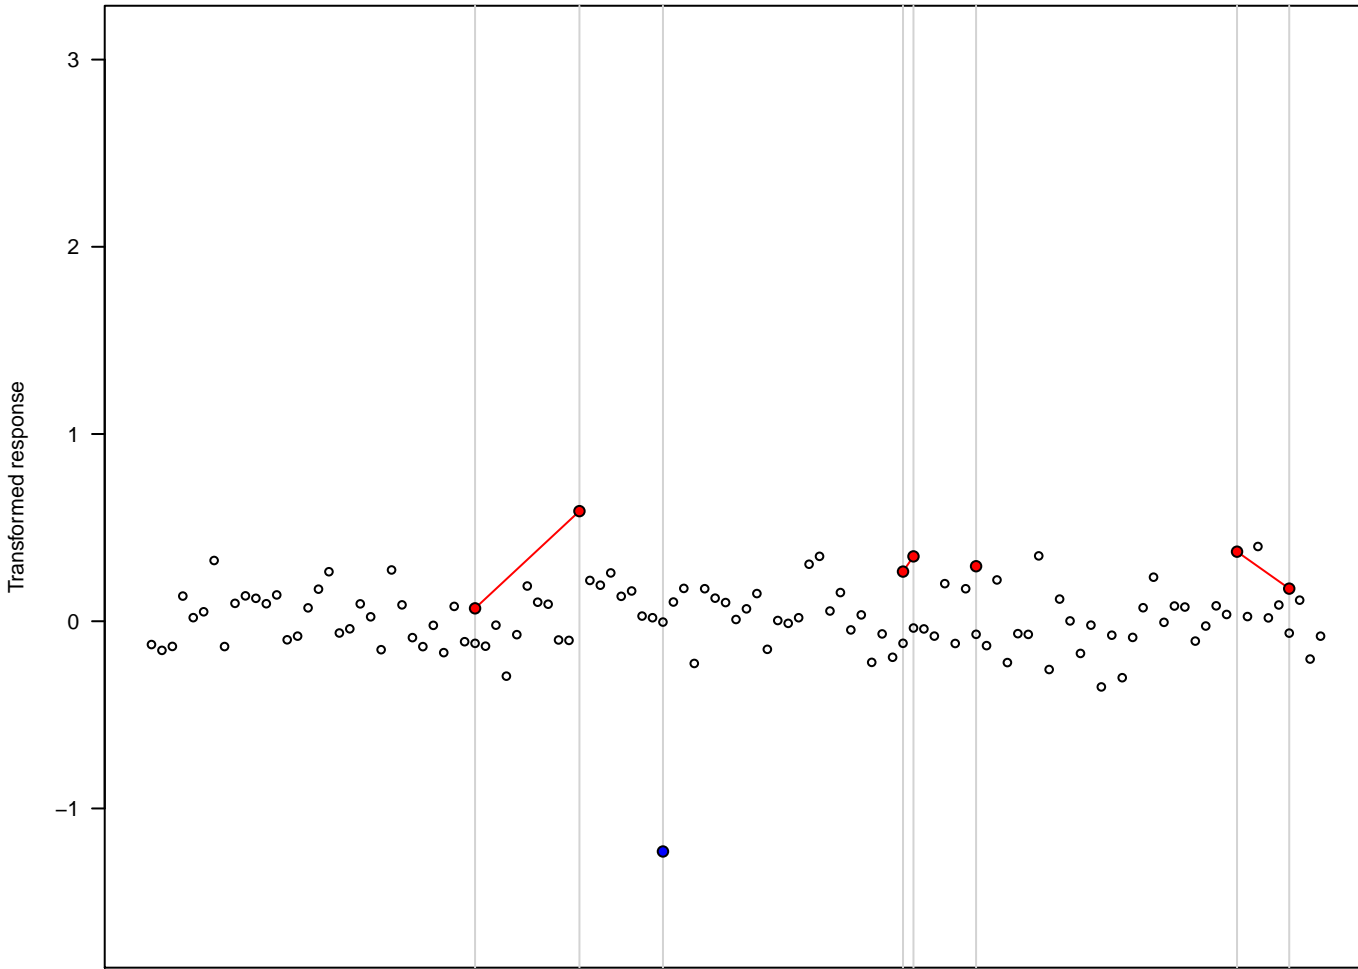

MRC Harwell

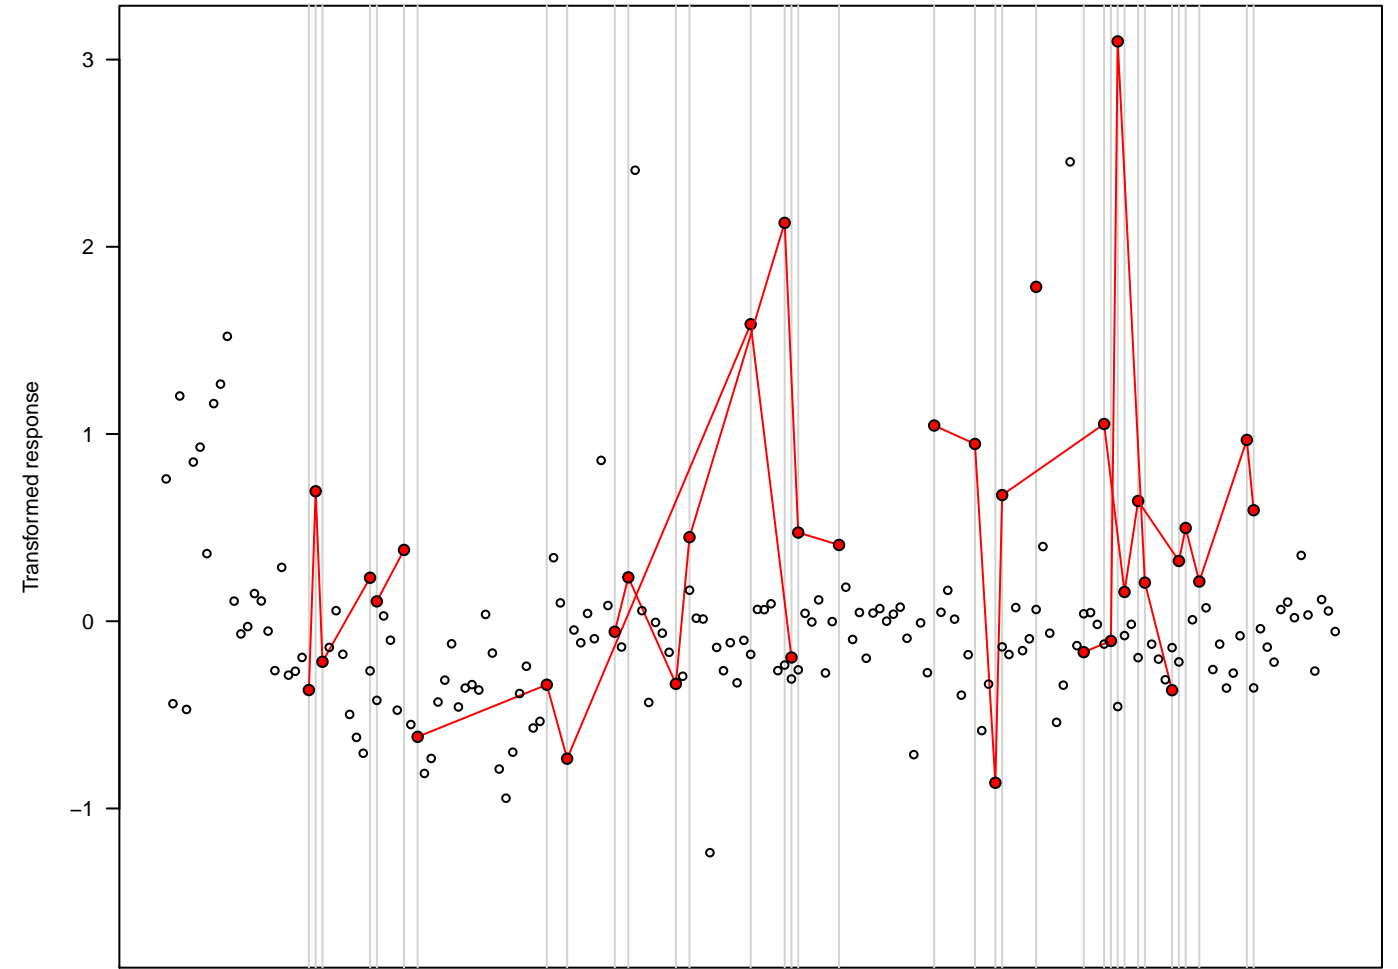

WTSI

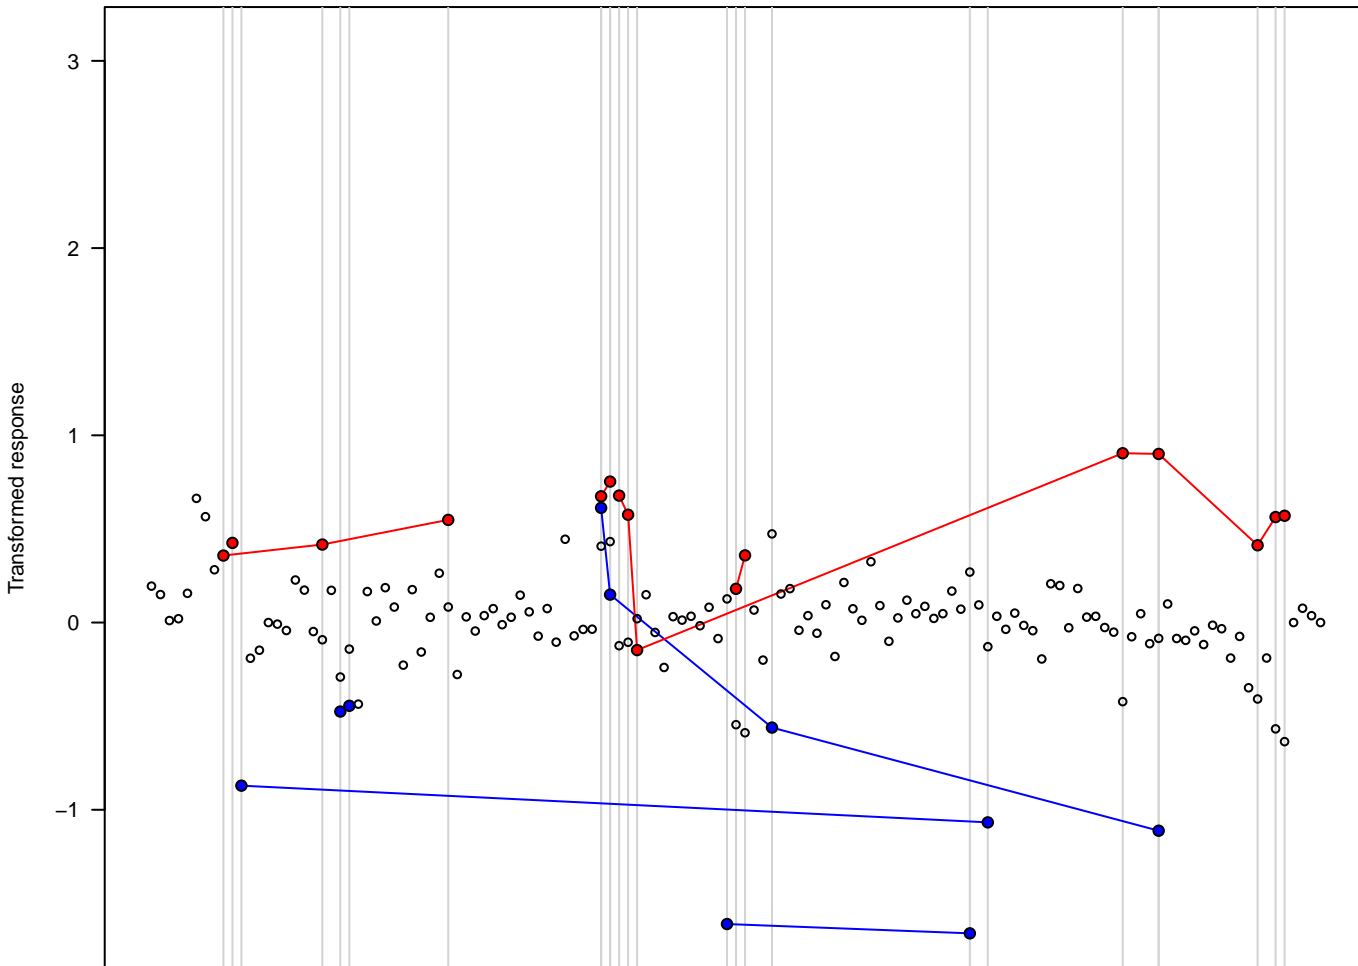

ICS

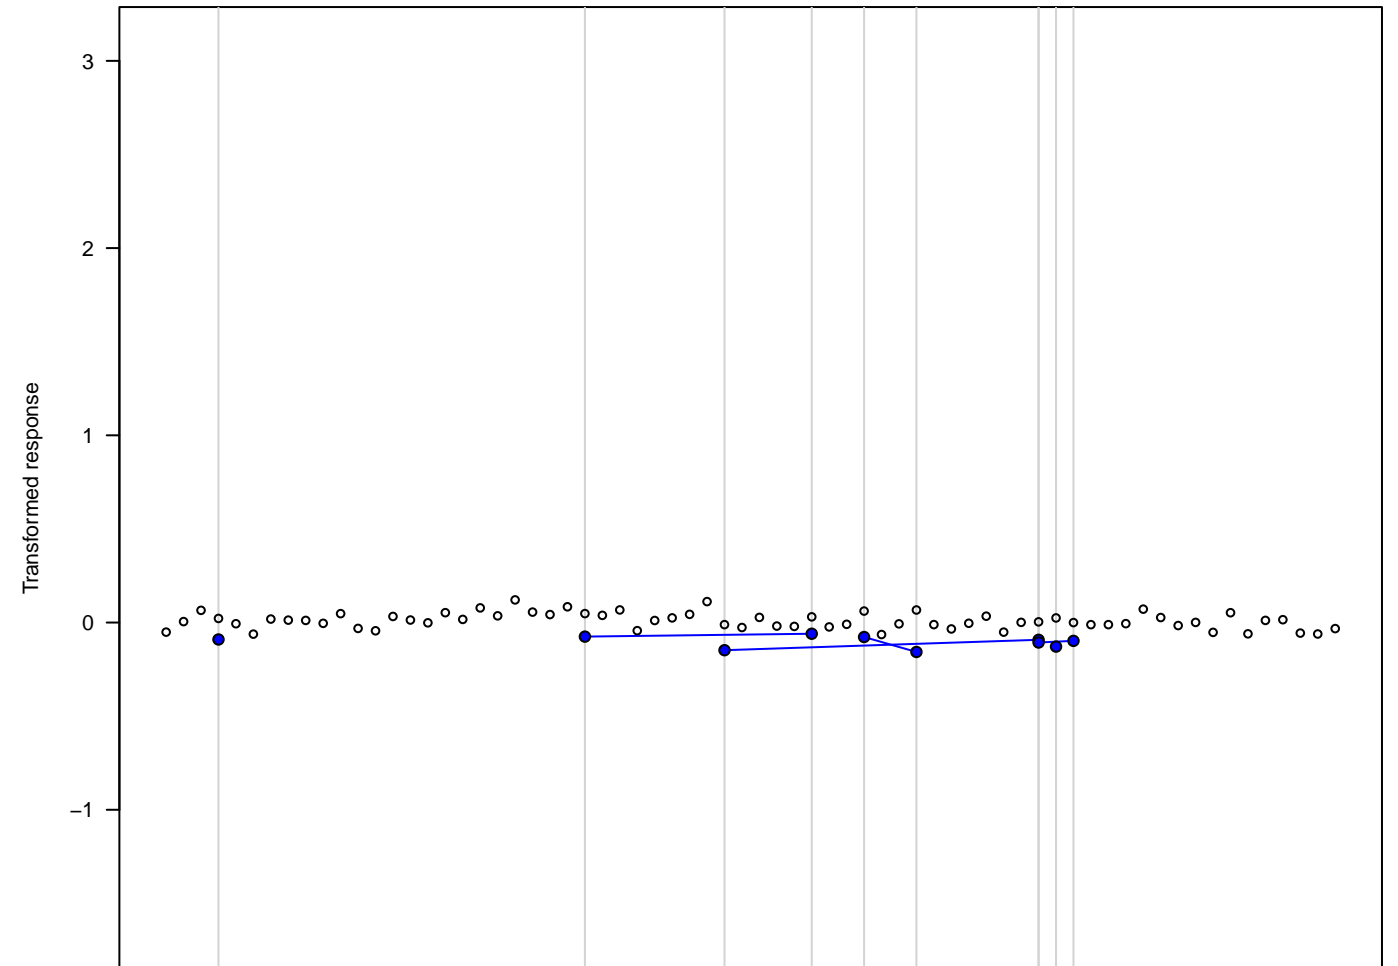

Centre distance travelled  
(Open-field)

HMGU

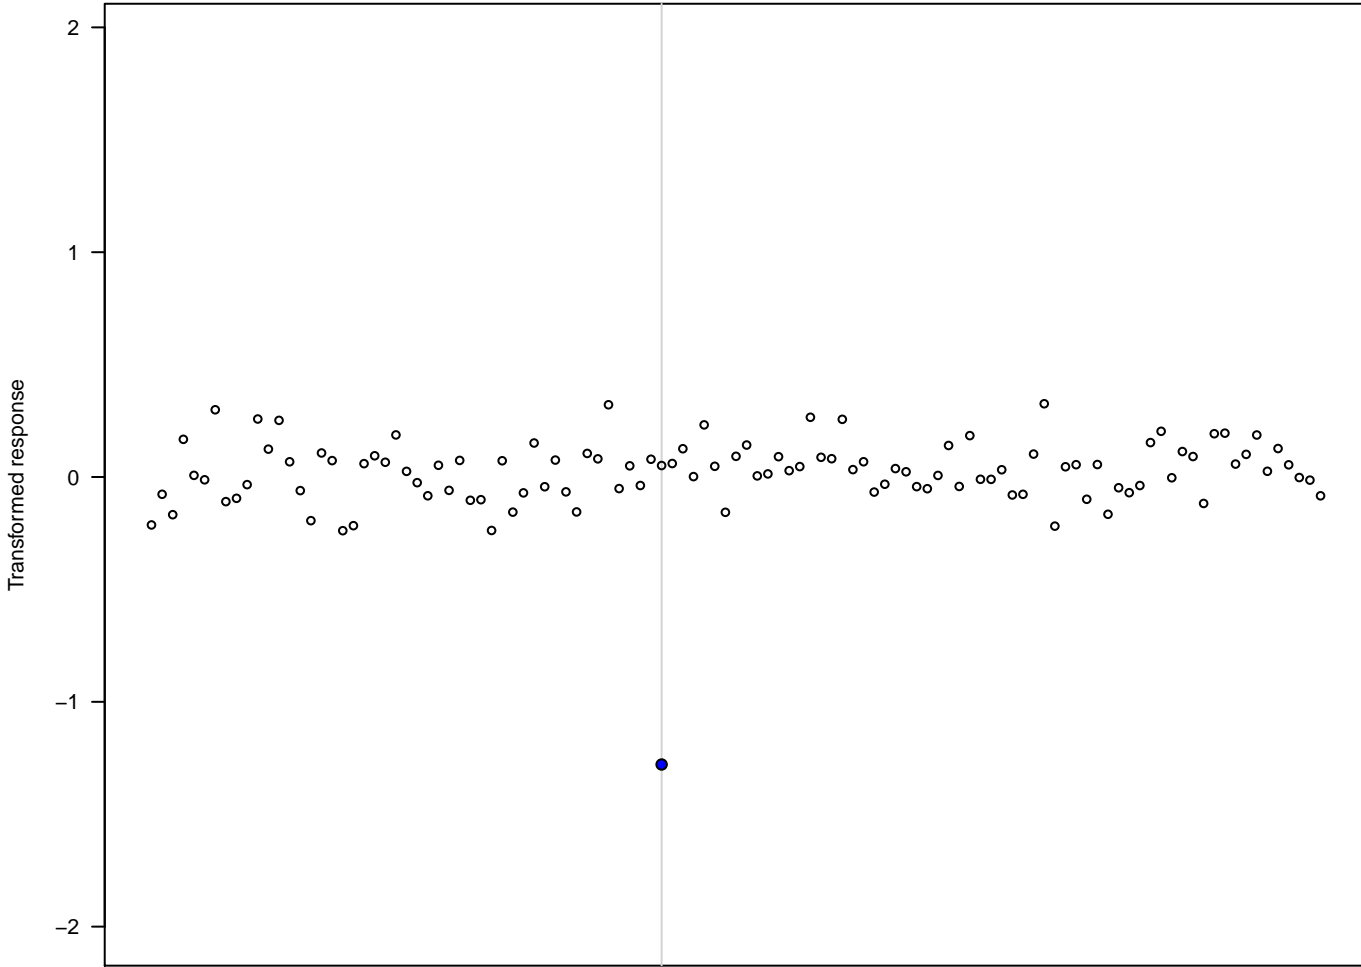

MRC Harwell

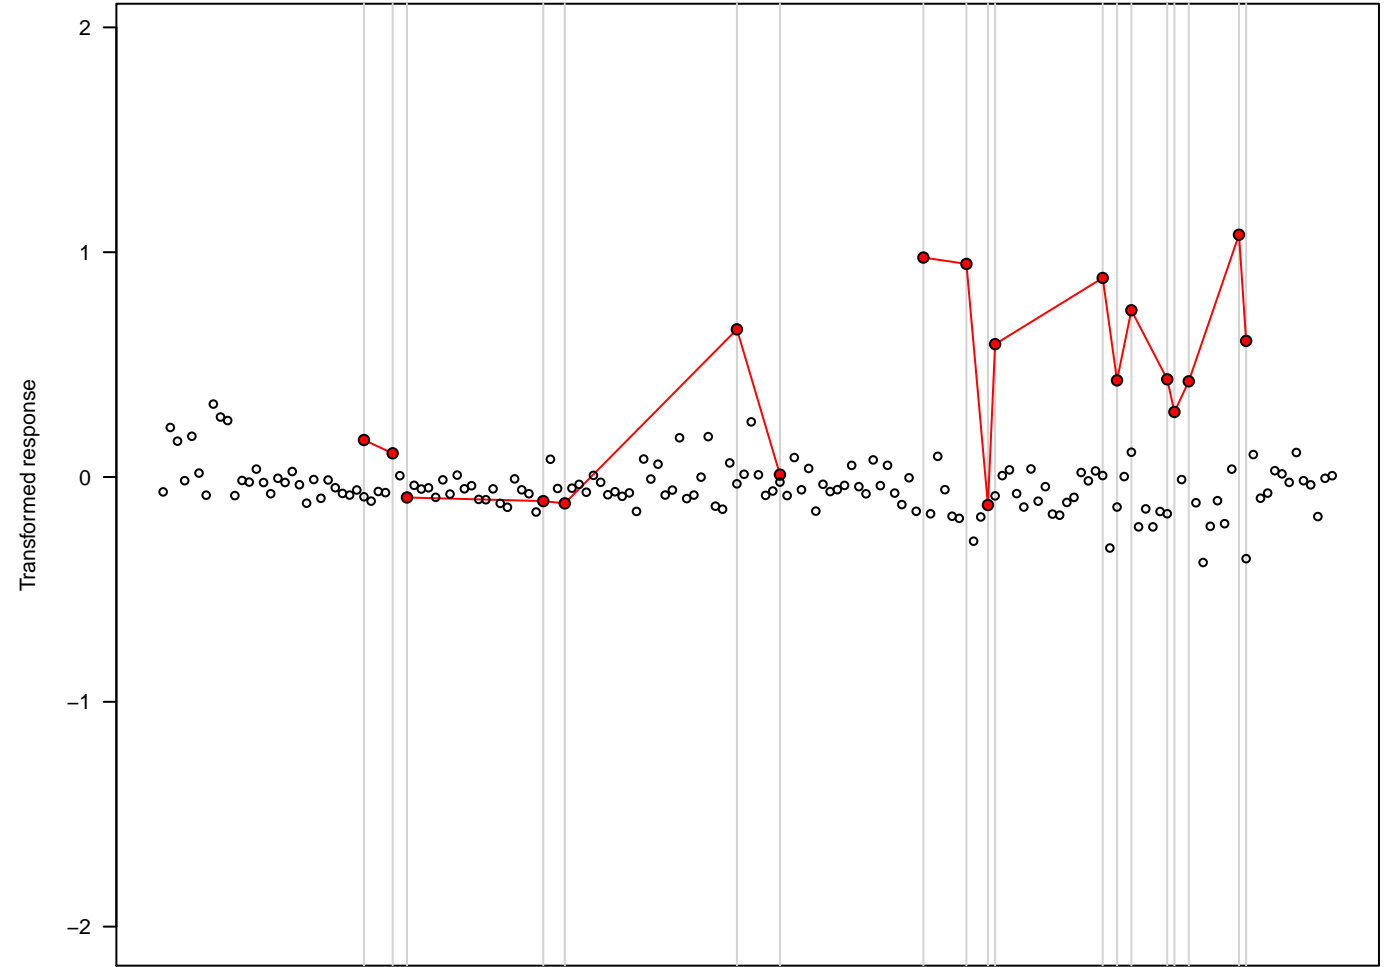

WTSI

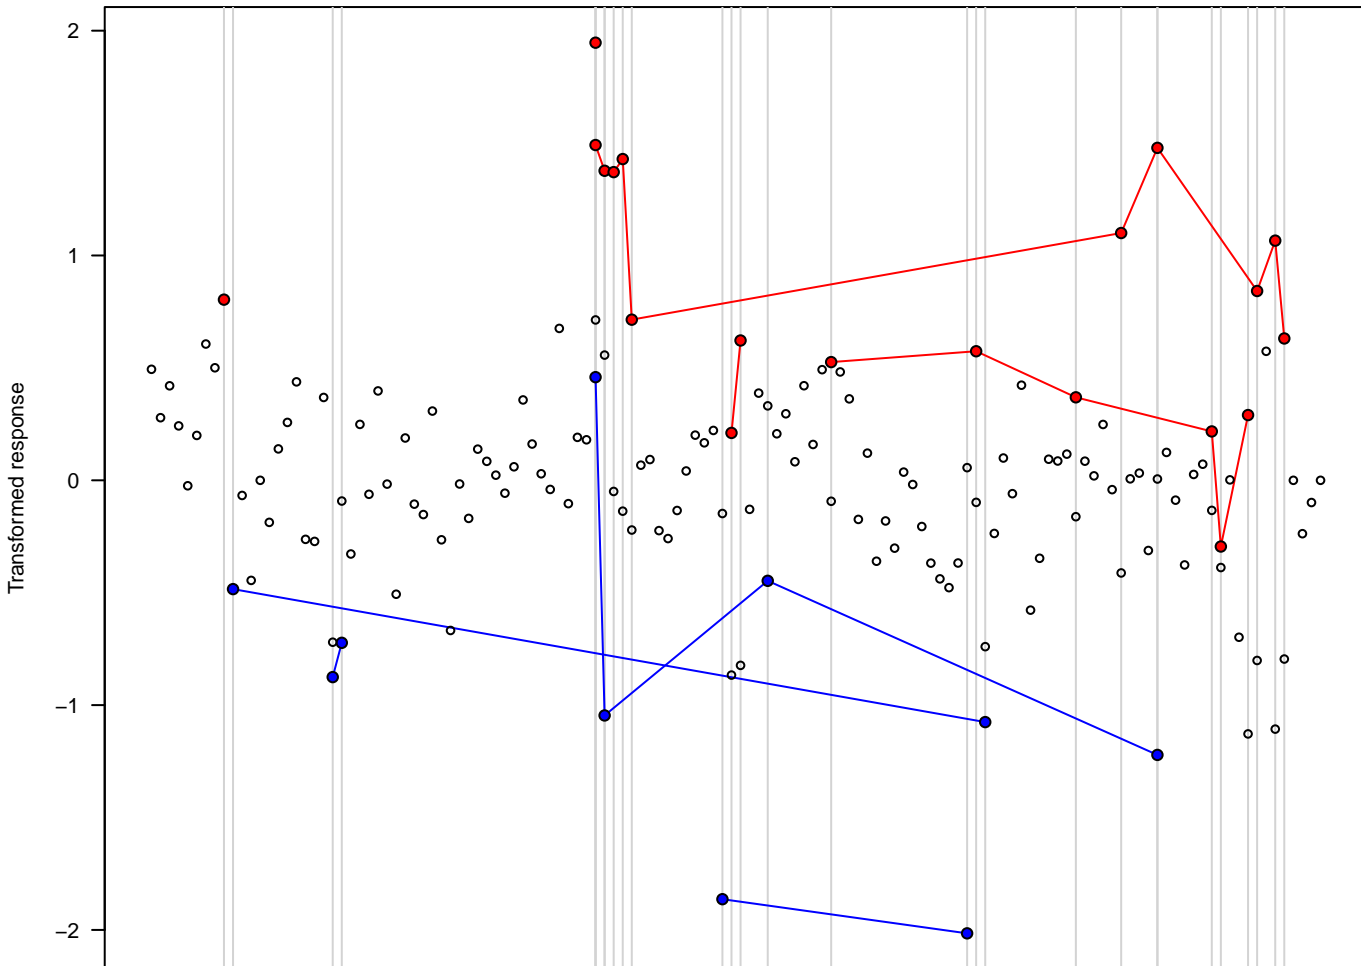

ICS

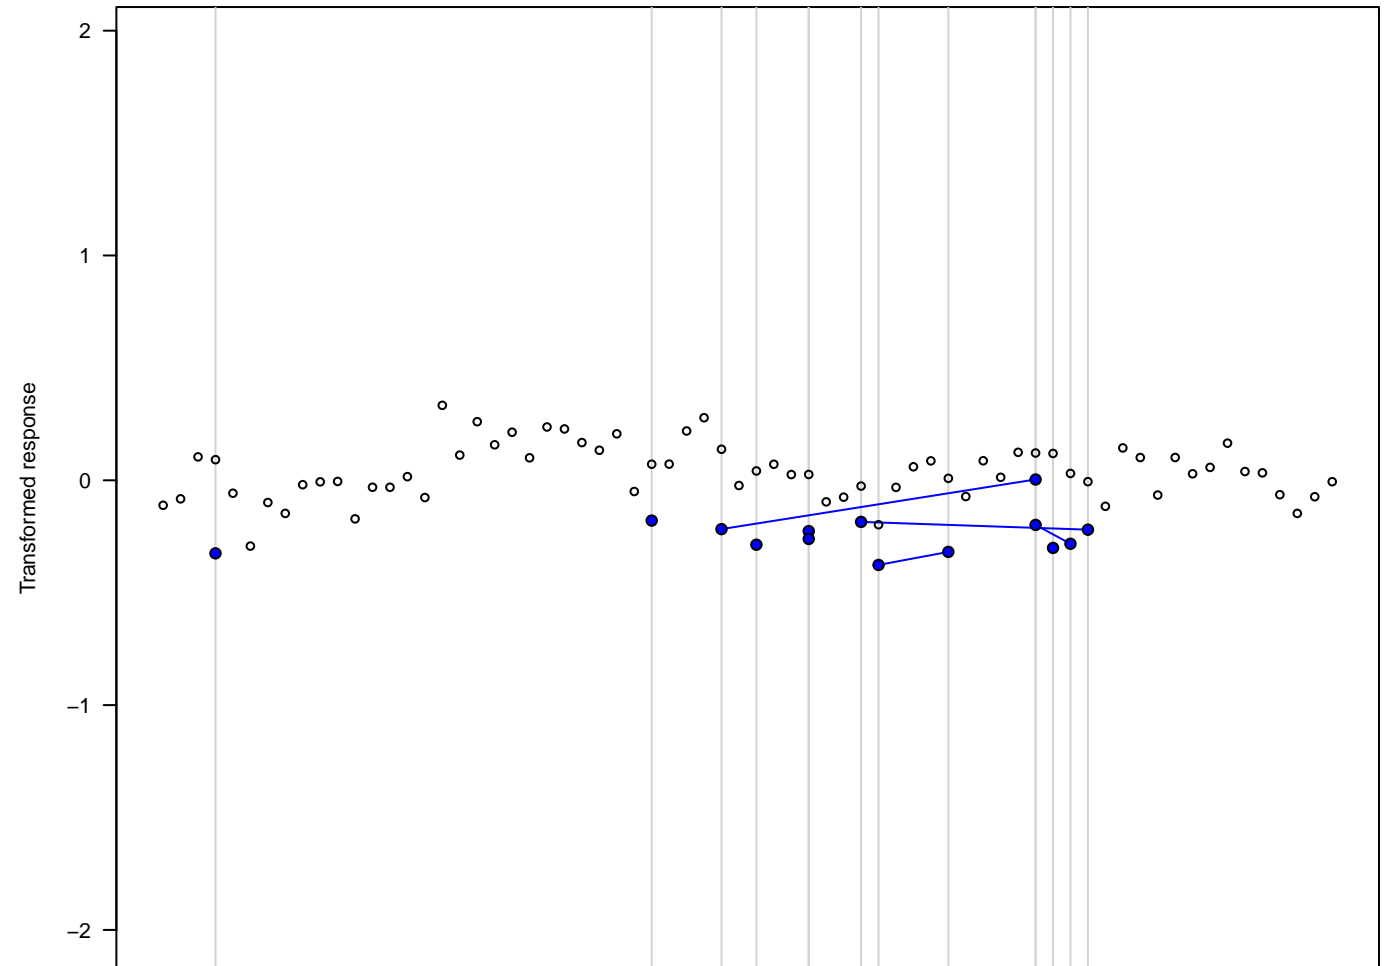

Centre resting time  
(Open-field)

HMGU

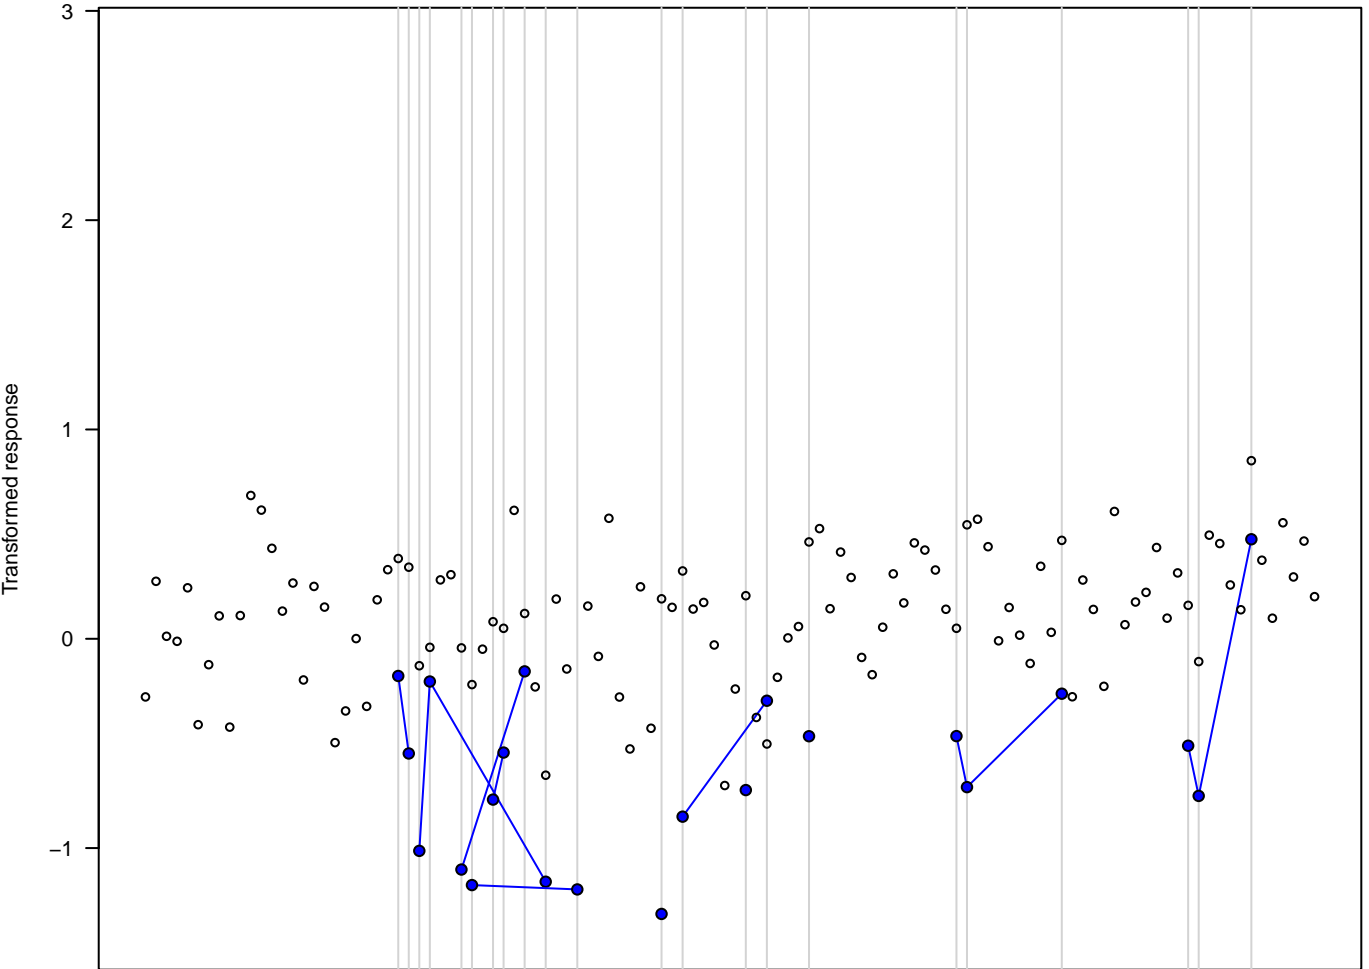

MRC Harwell

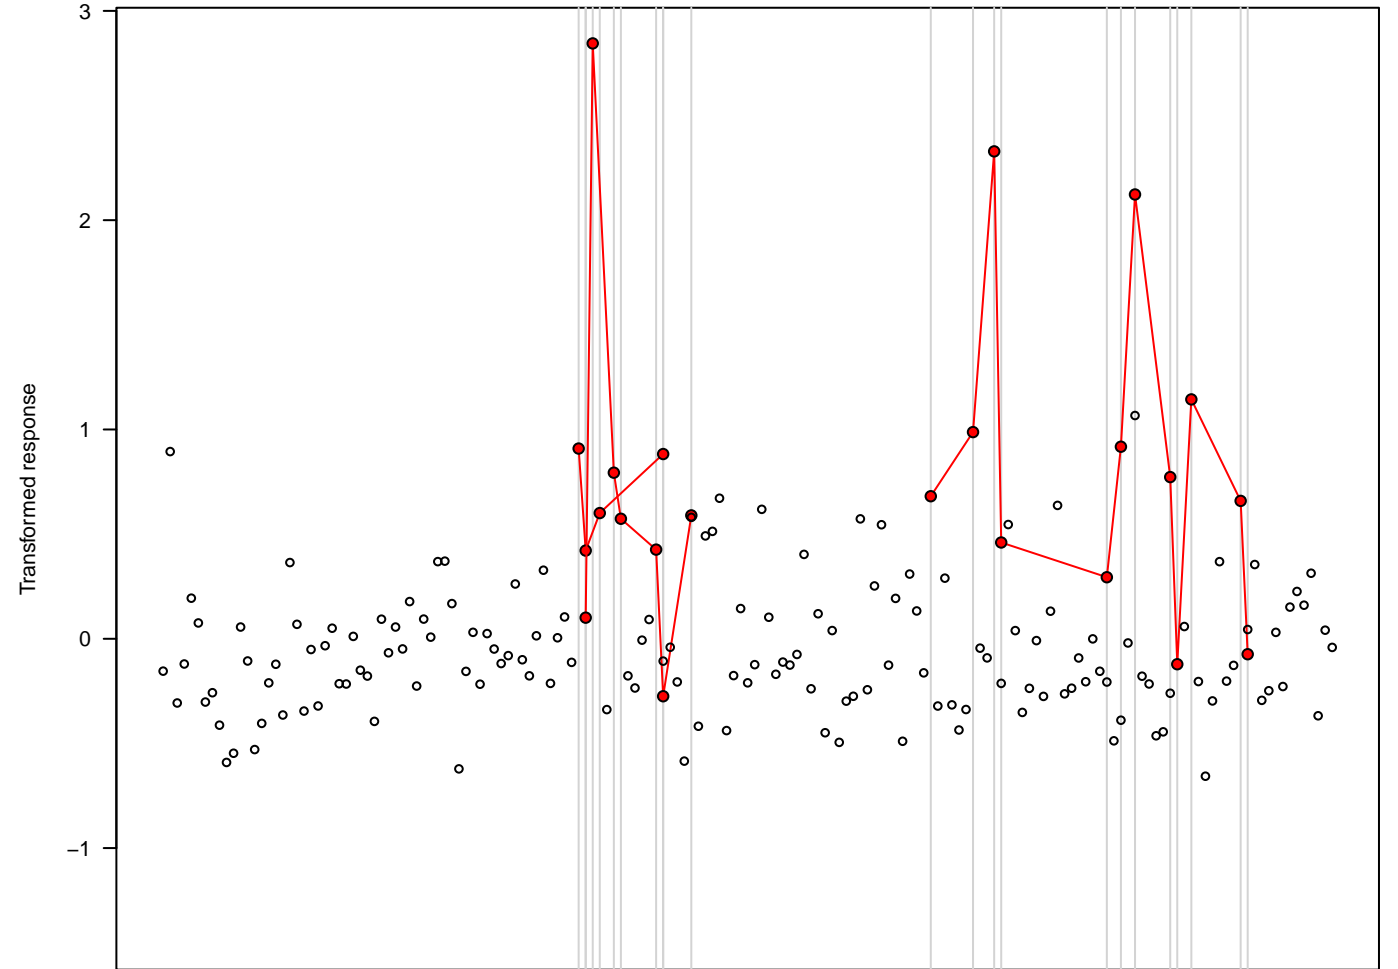

WTSI

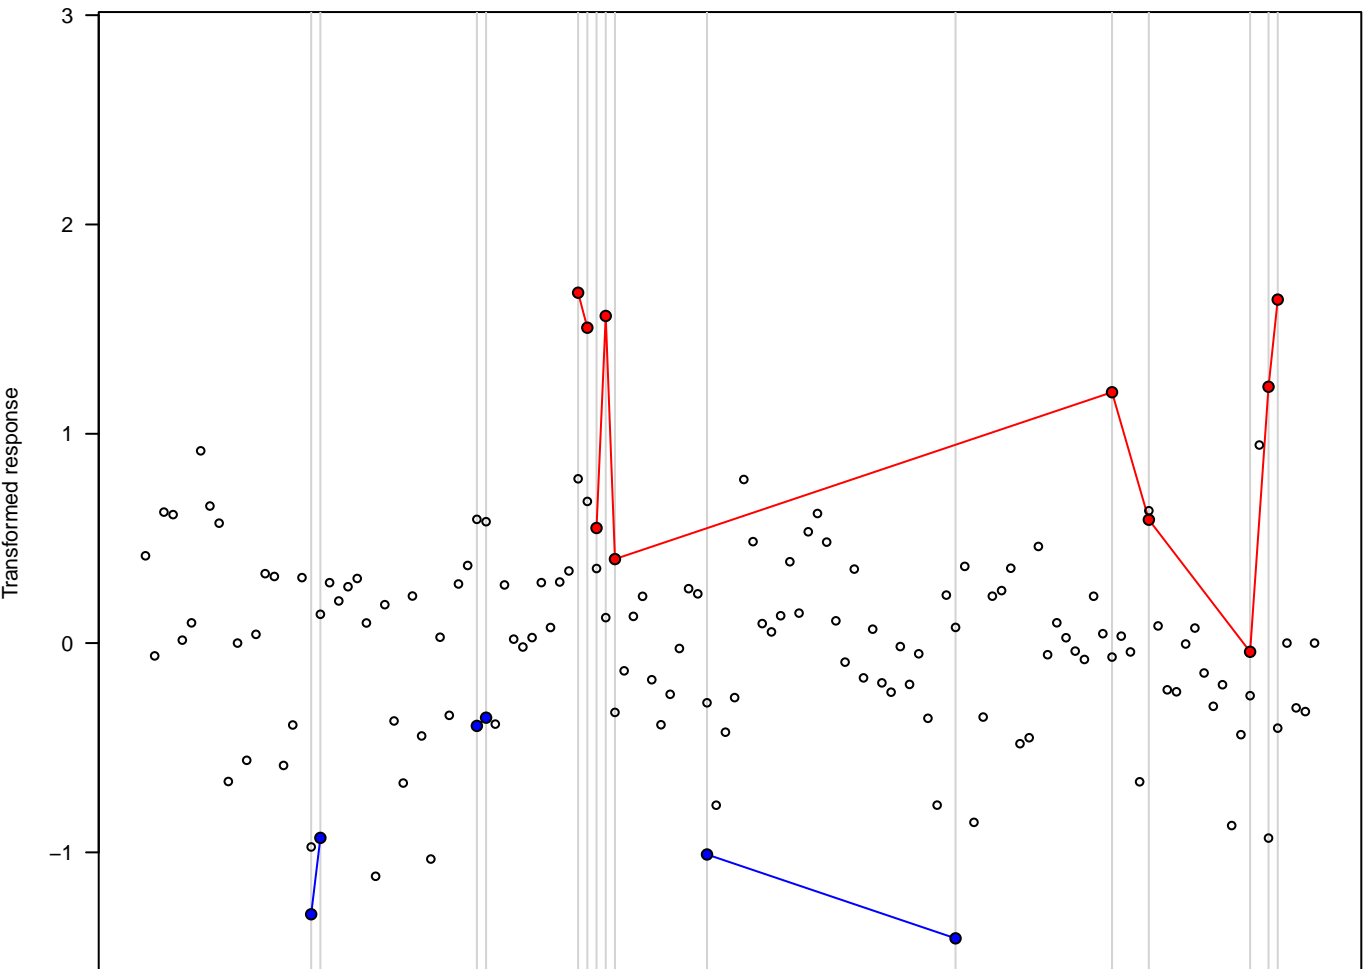

ICS

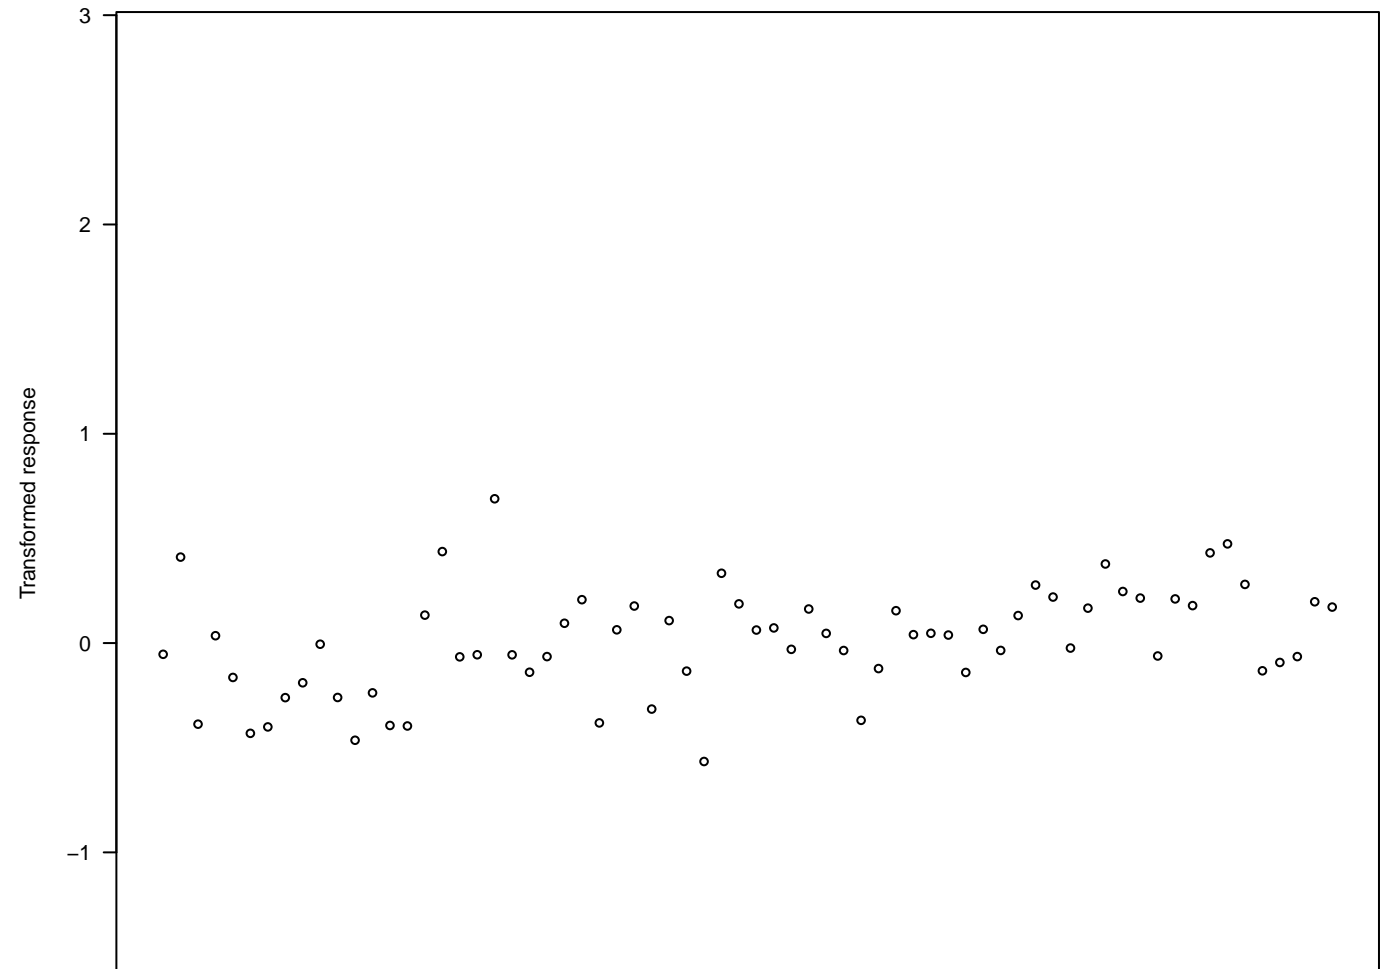



Centre permanence time  
(Open-field)

HMGU

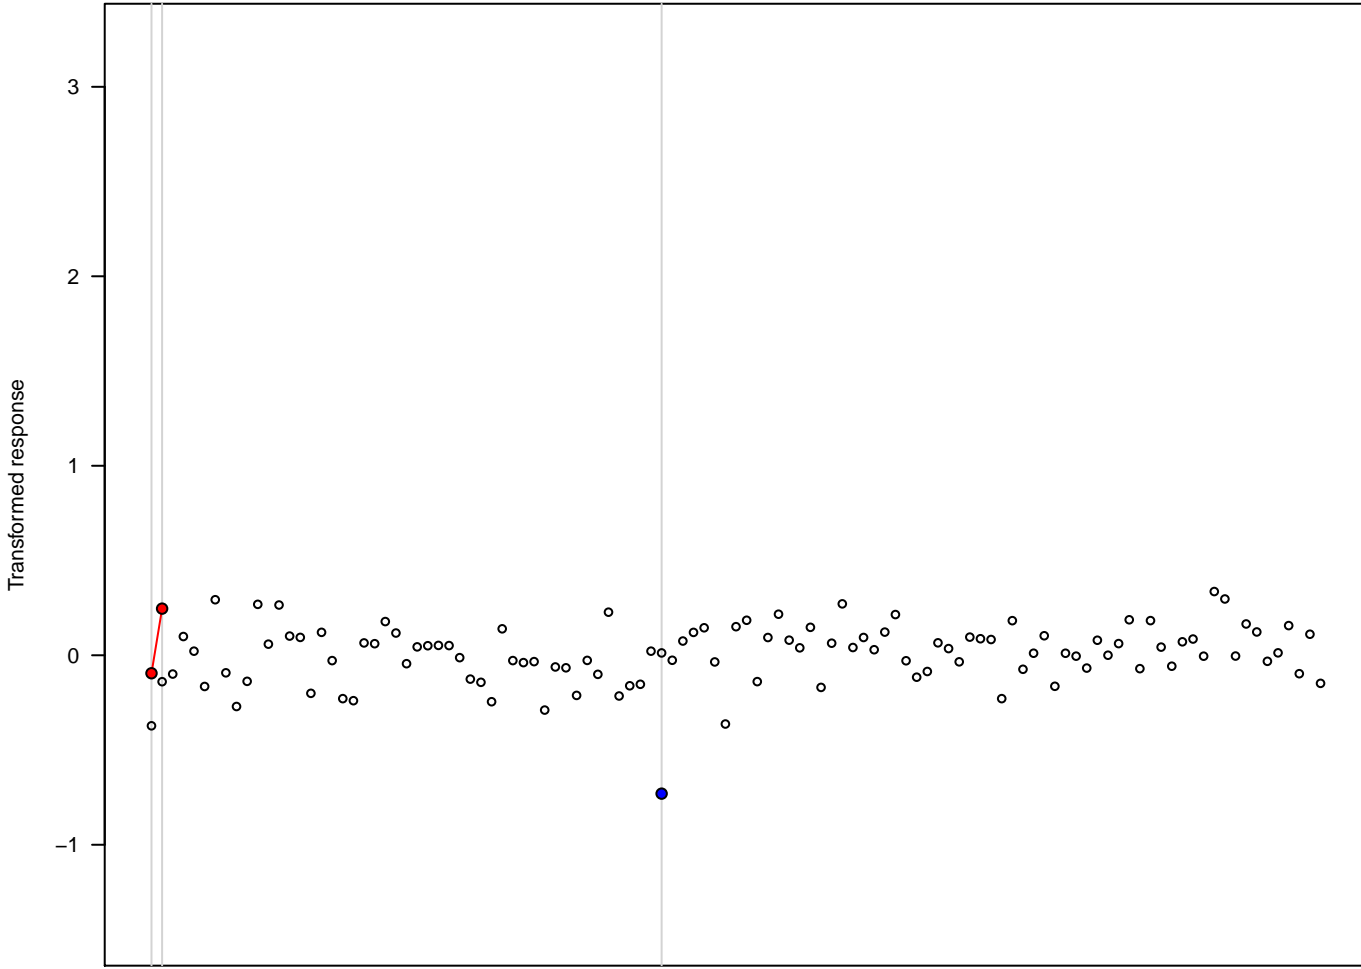

MRC Harwell

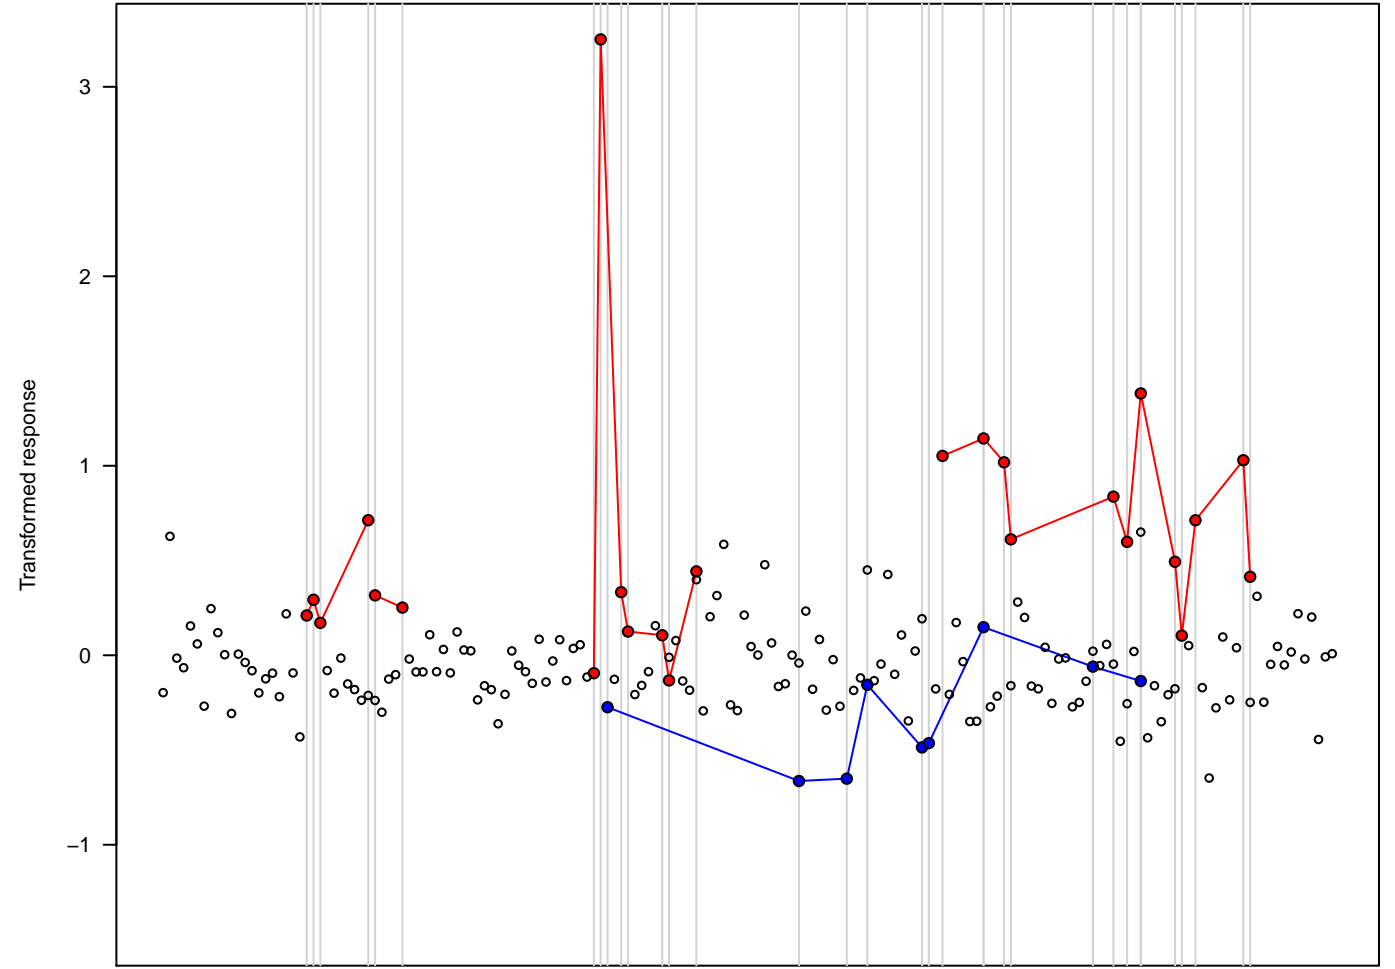

WTSI

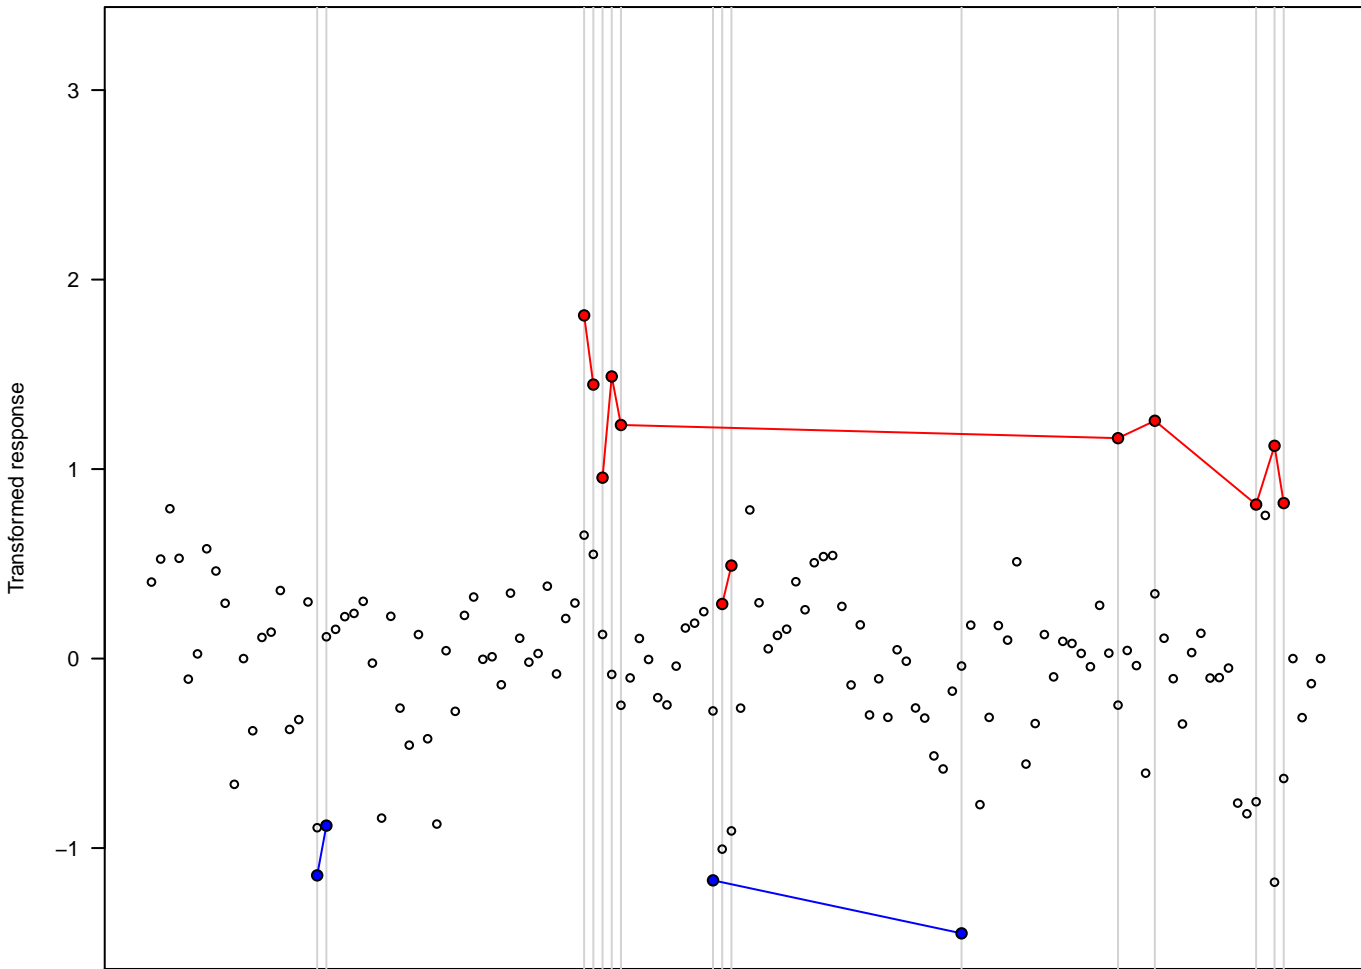

ICS

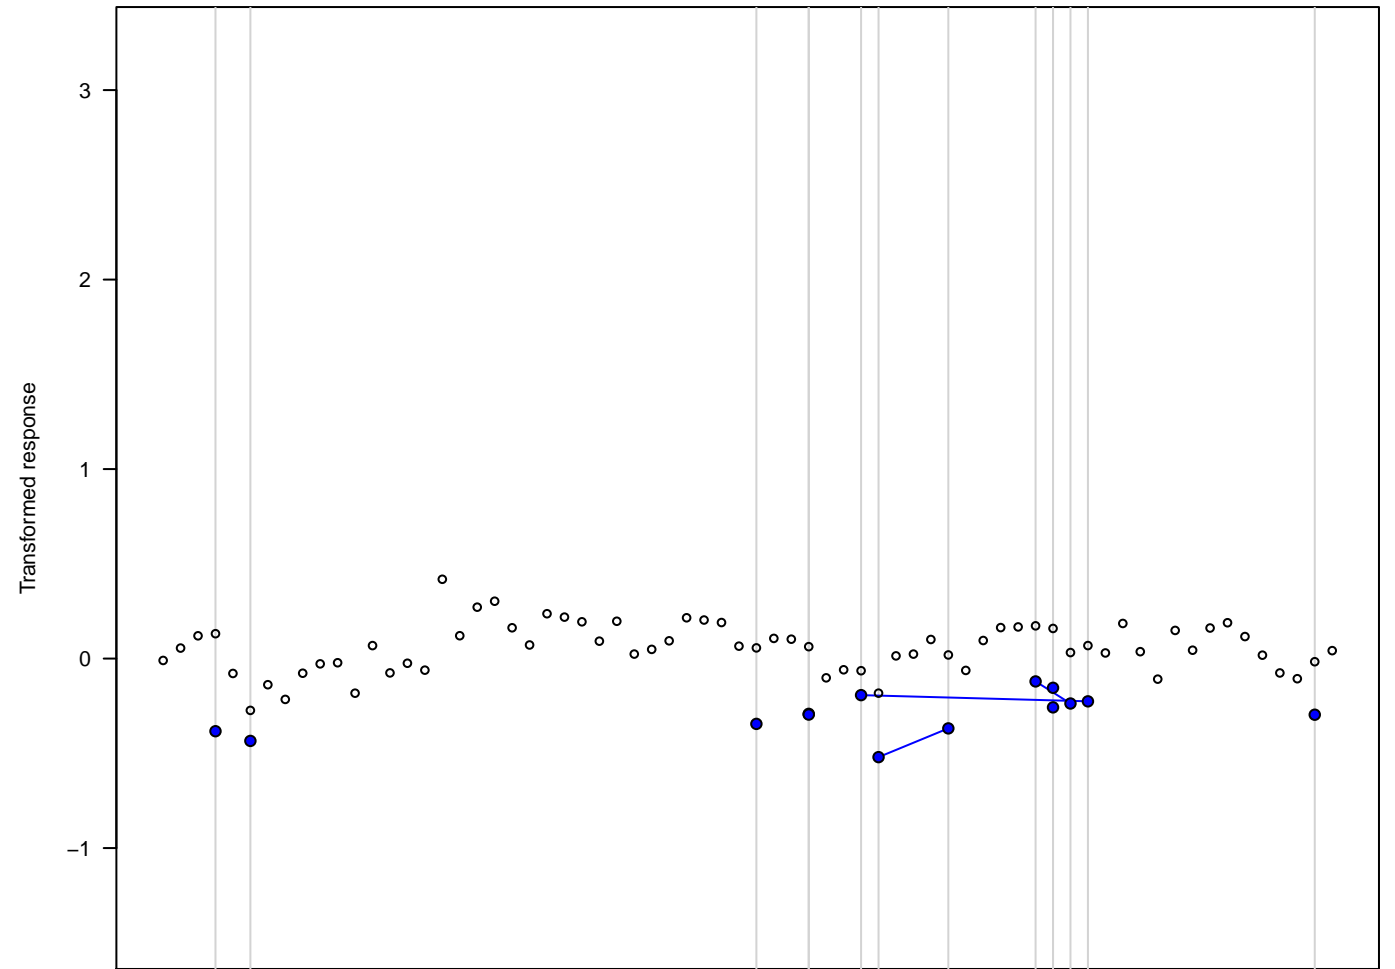

Centre average speed  
(Open-field)

HMGU

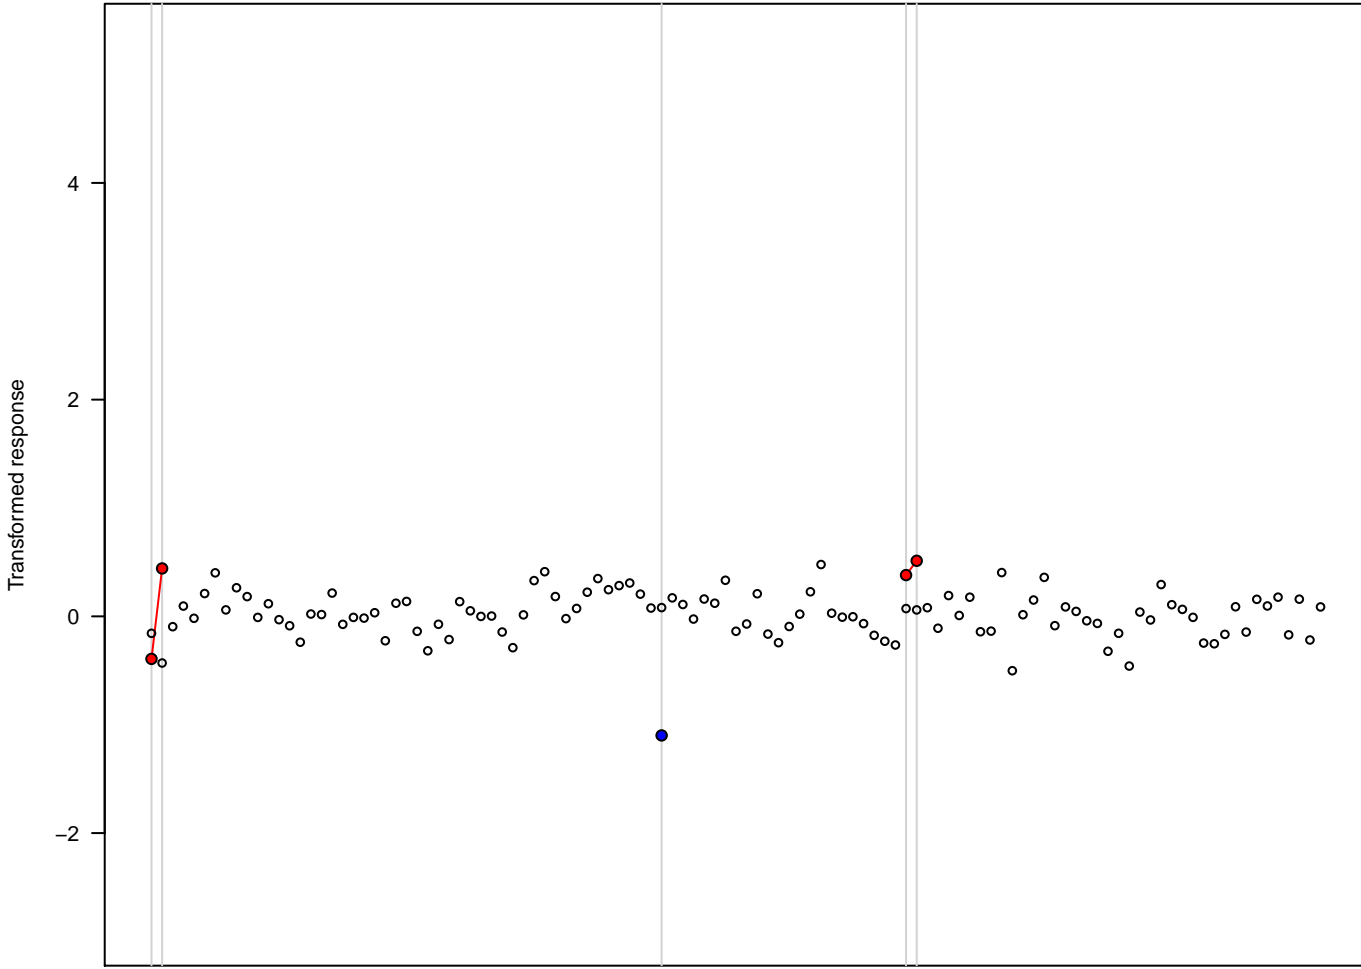

MRC Harwell

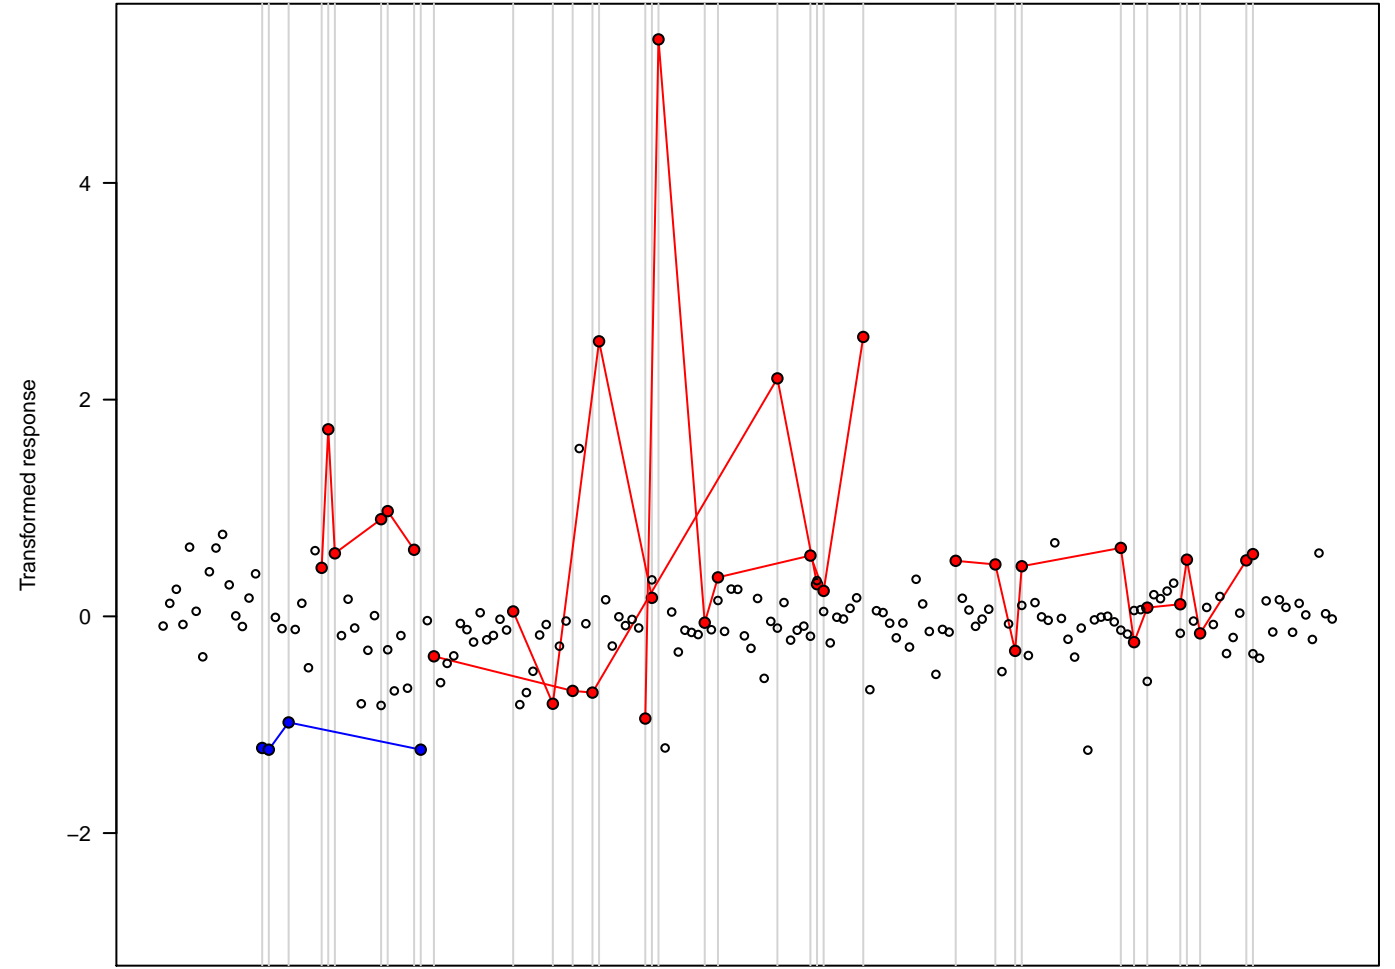

WTSI

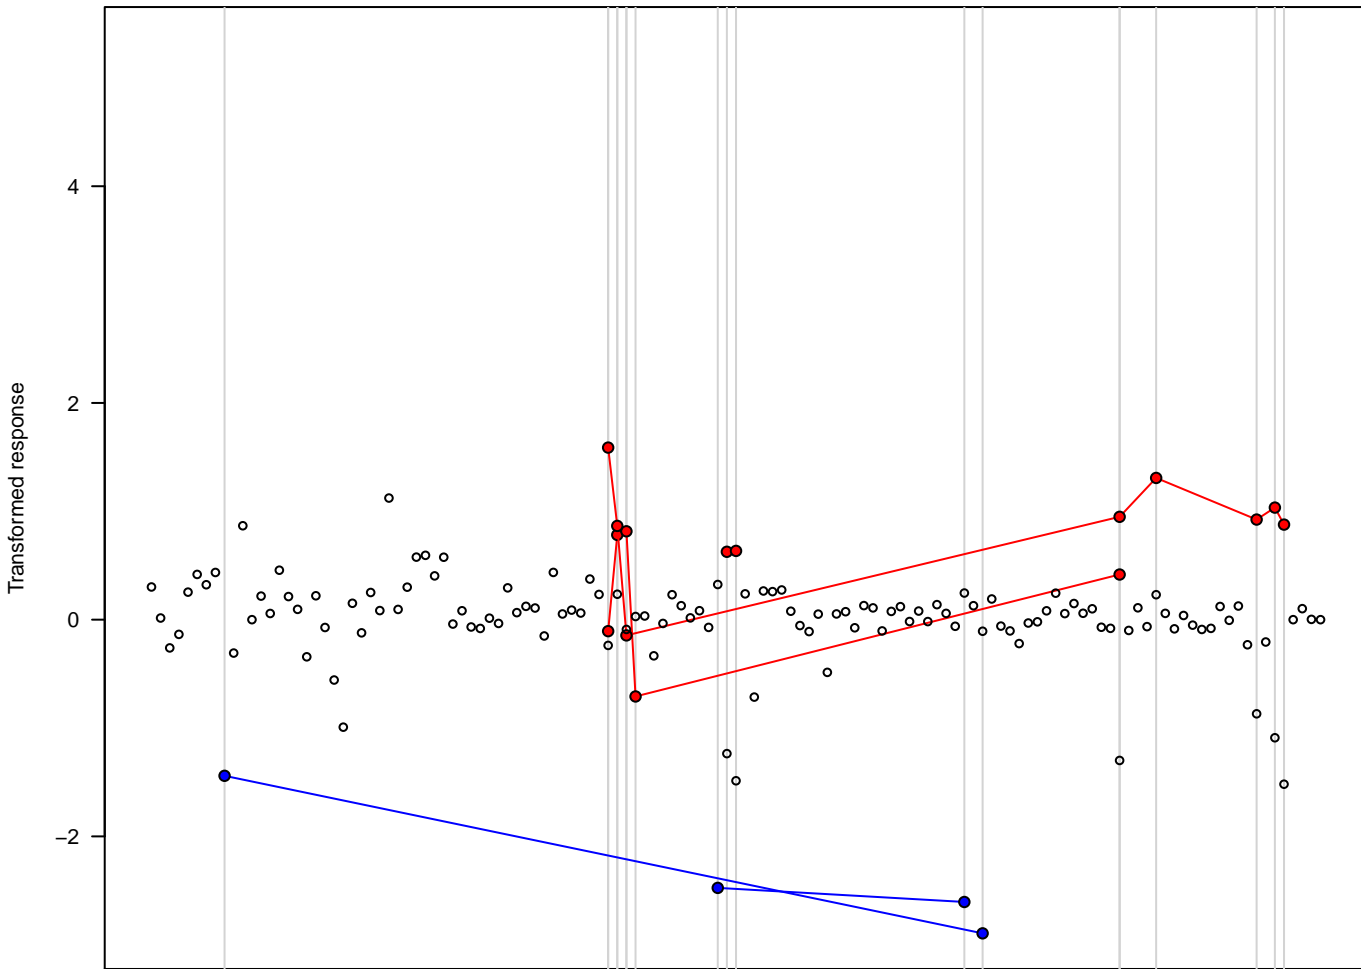

ICS

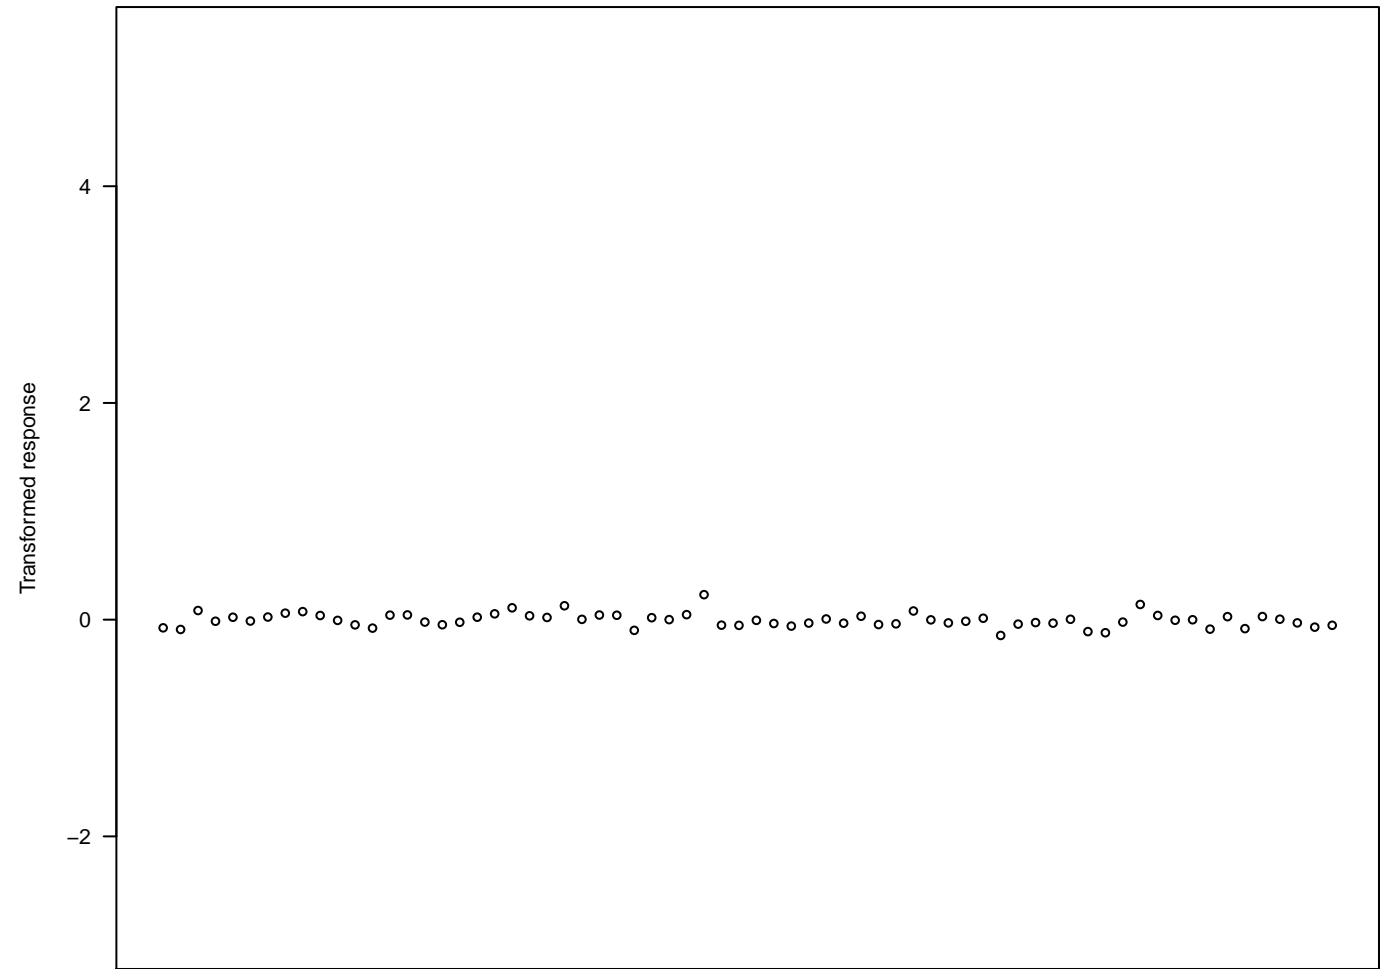

Latency to centre entry  
(Open-field)

HMGU

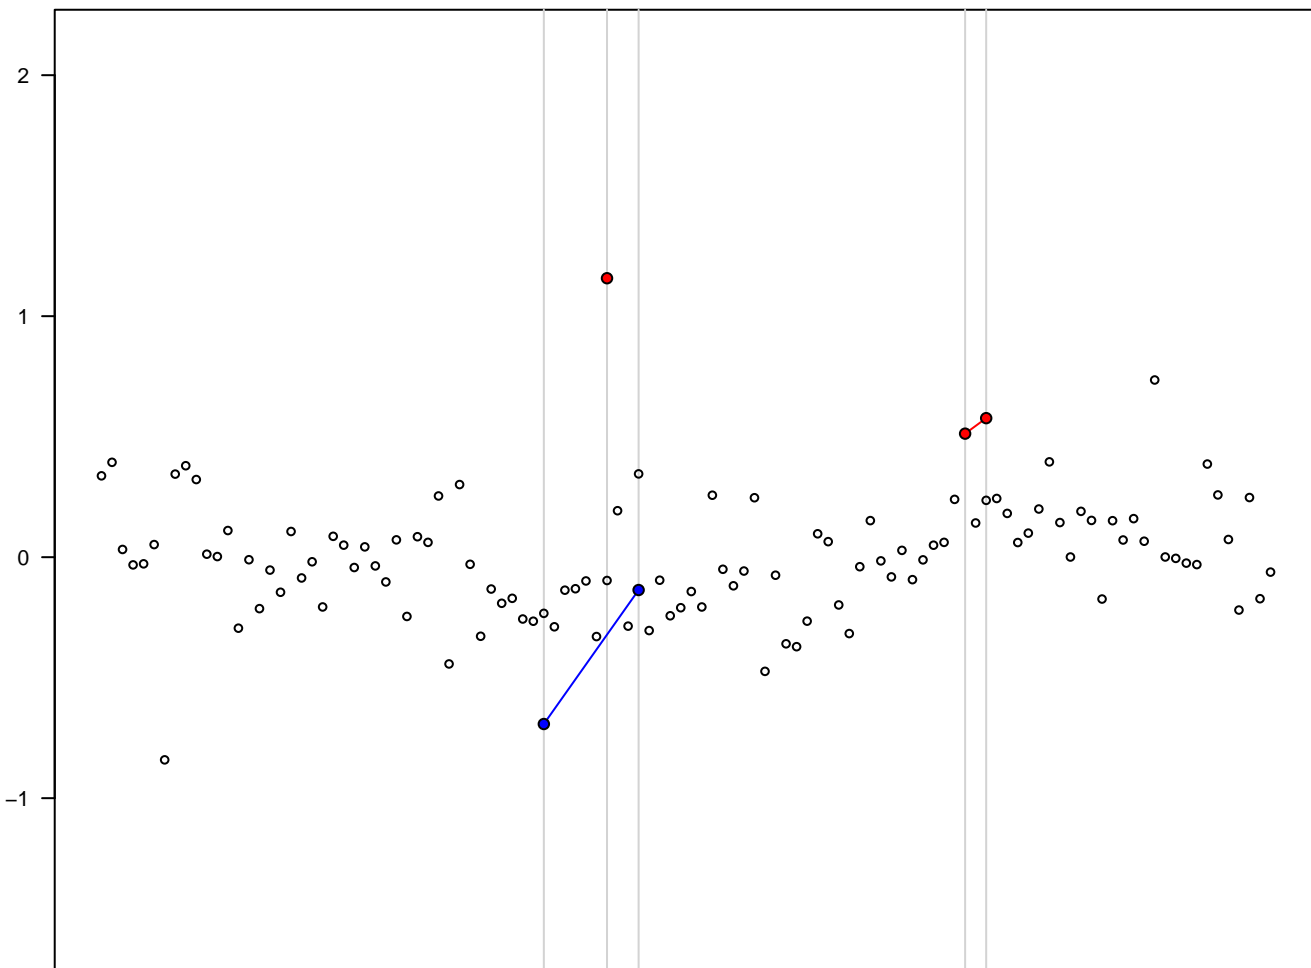

MRC Harwell

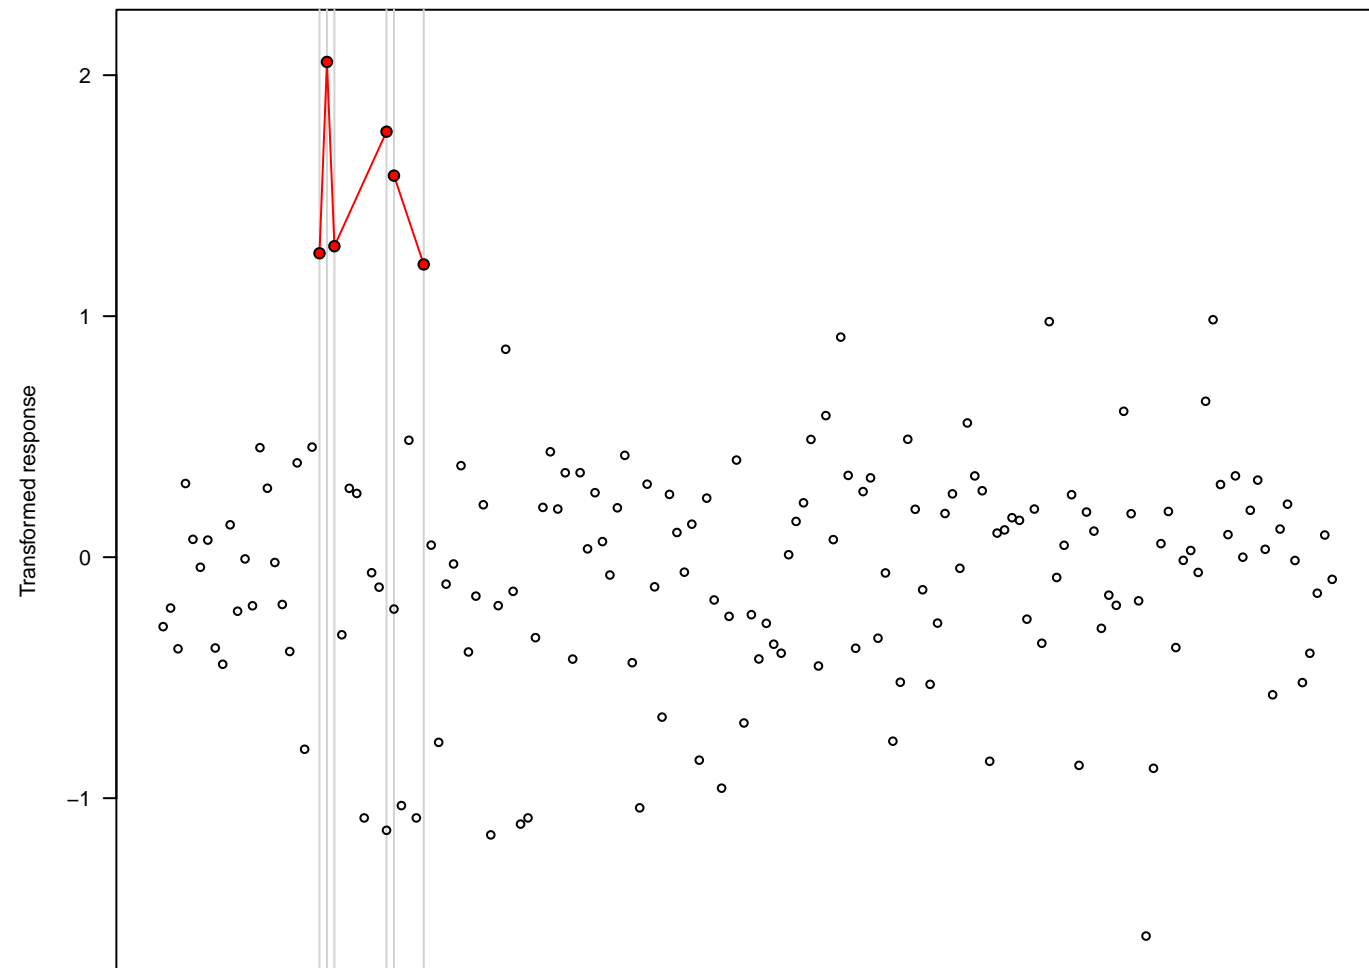

WTSI

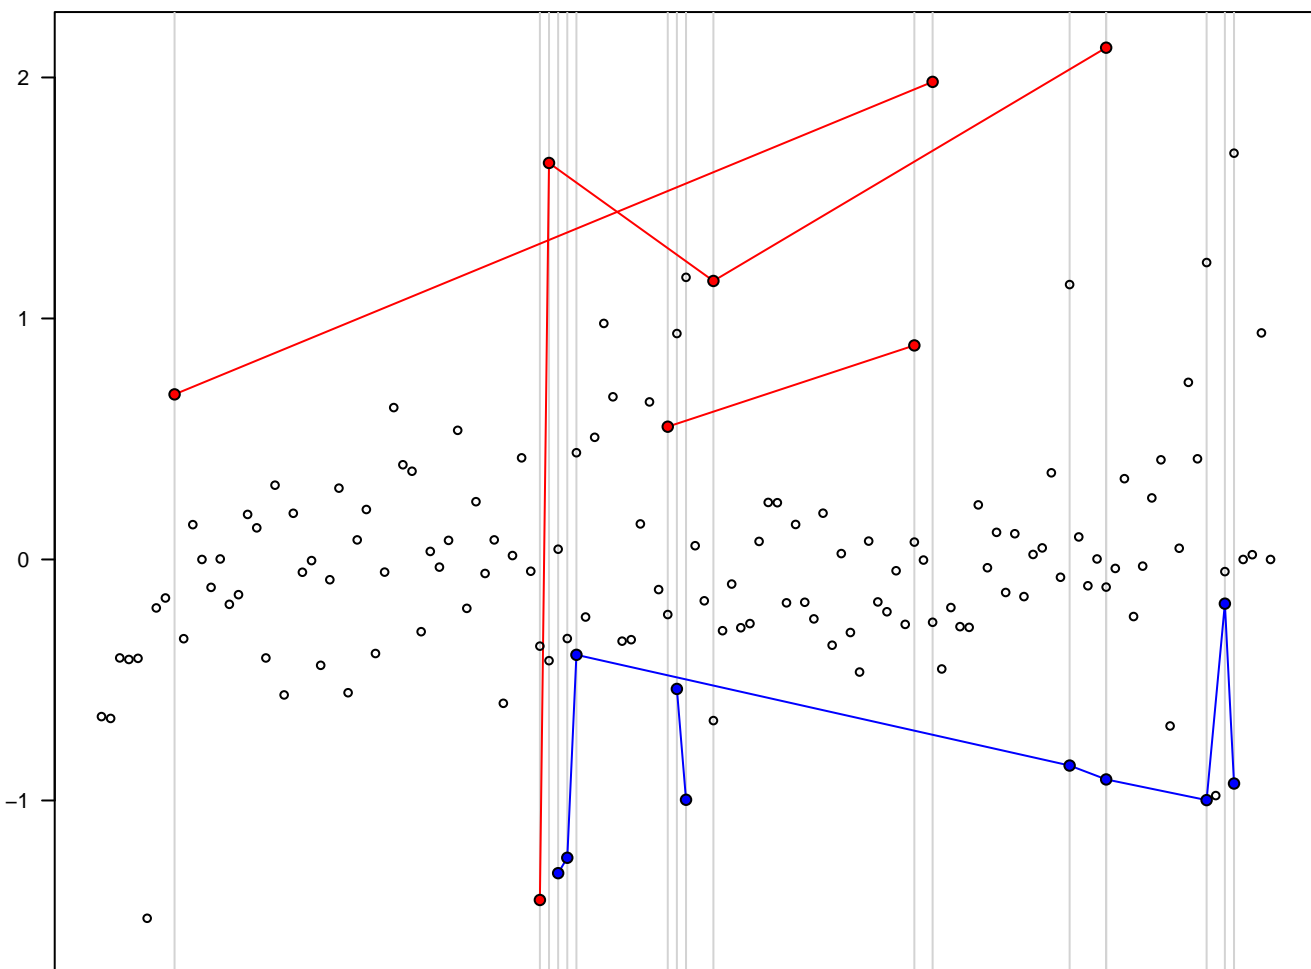

ICS

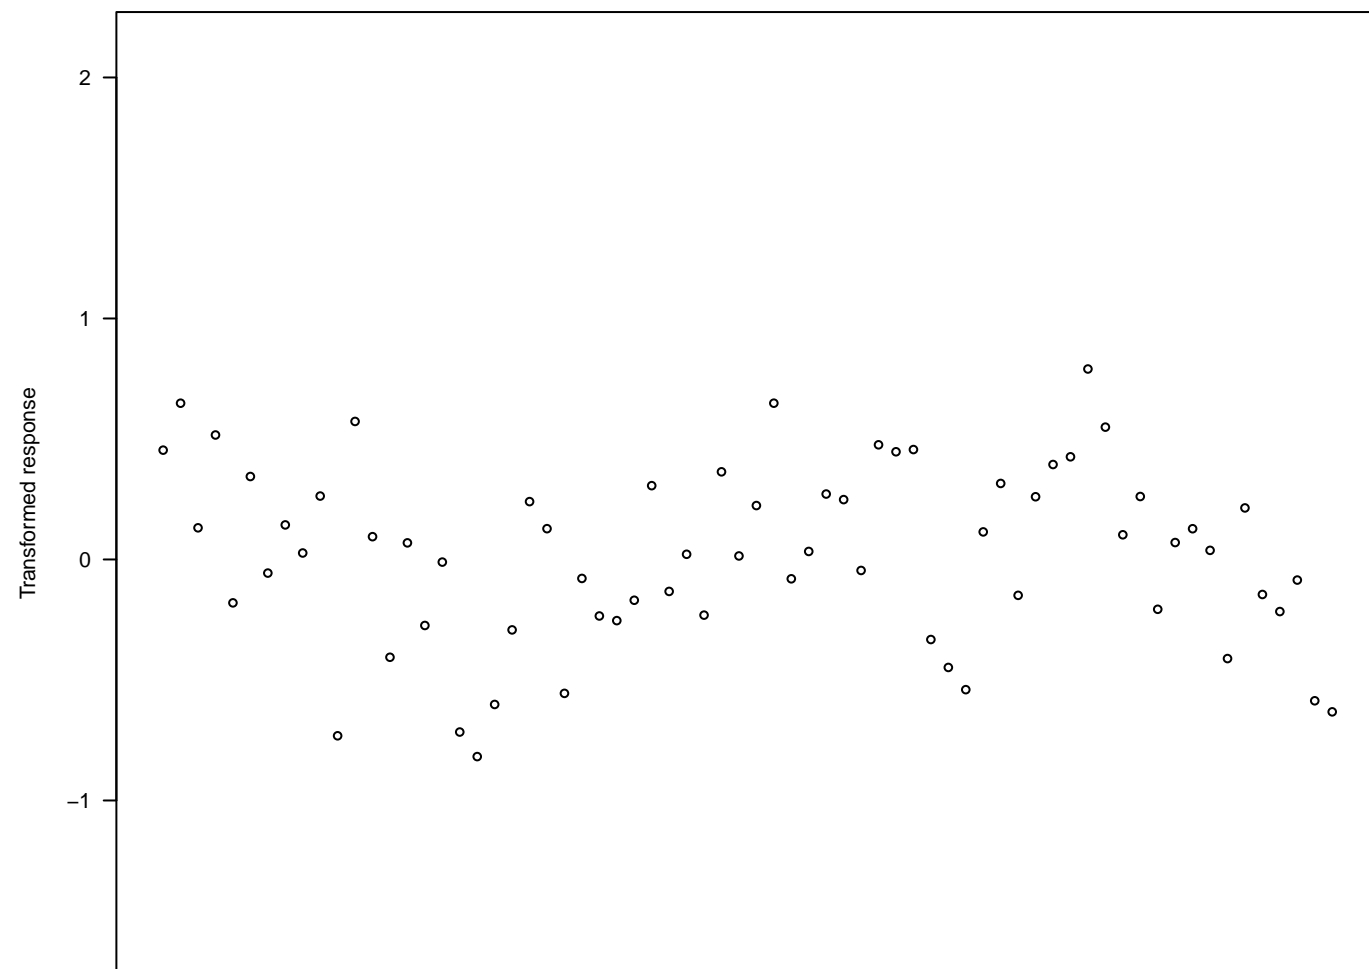

Number of entries  
(Open-field)

HMGU

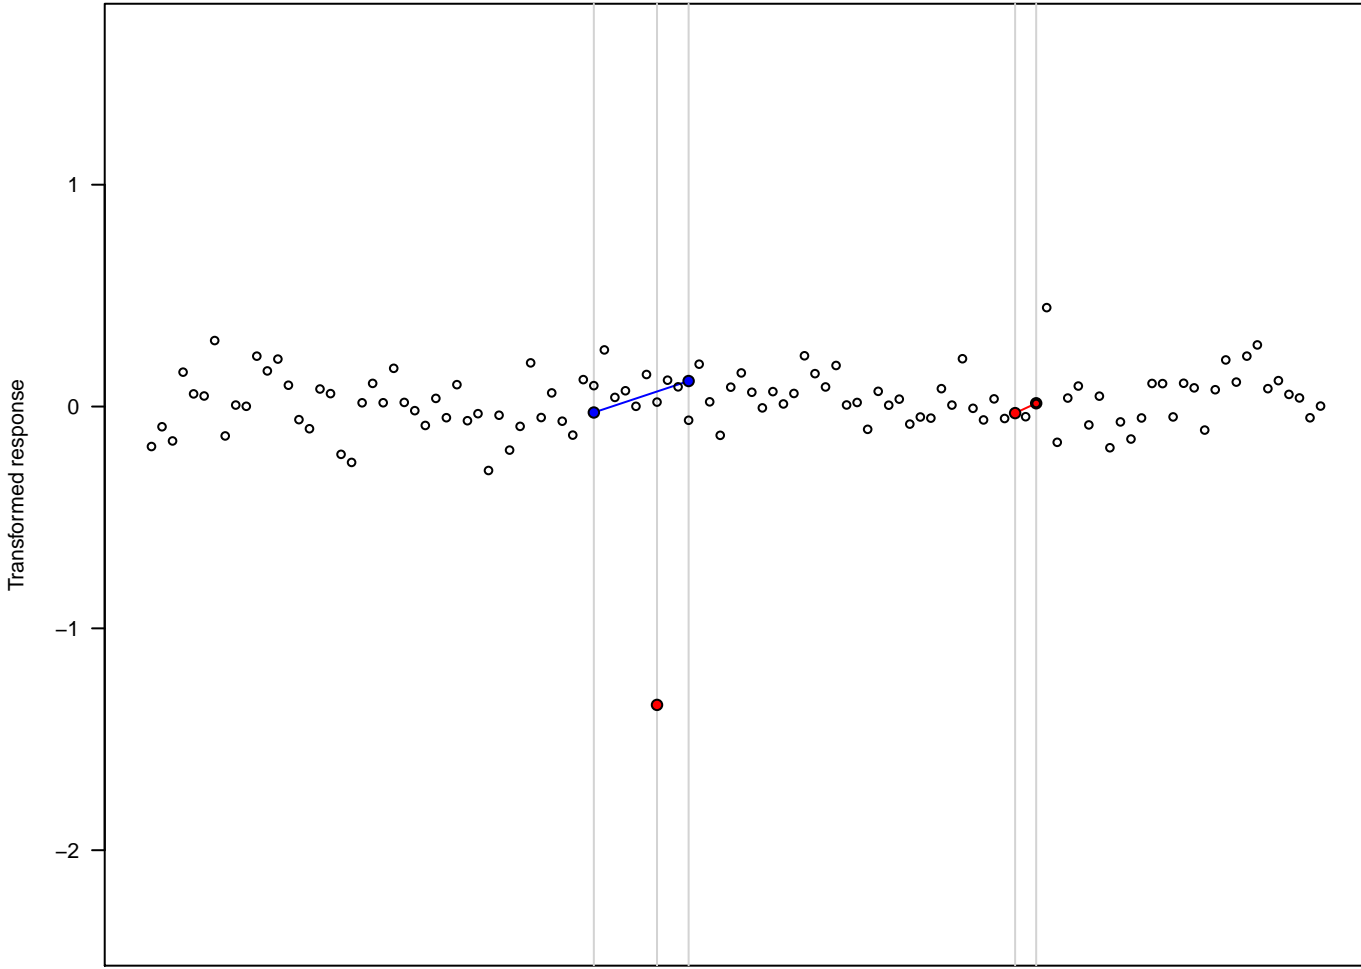

MRC Harwell

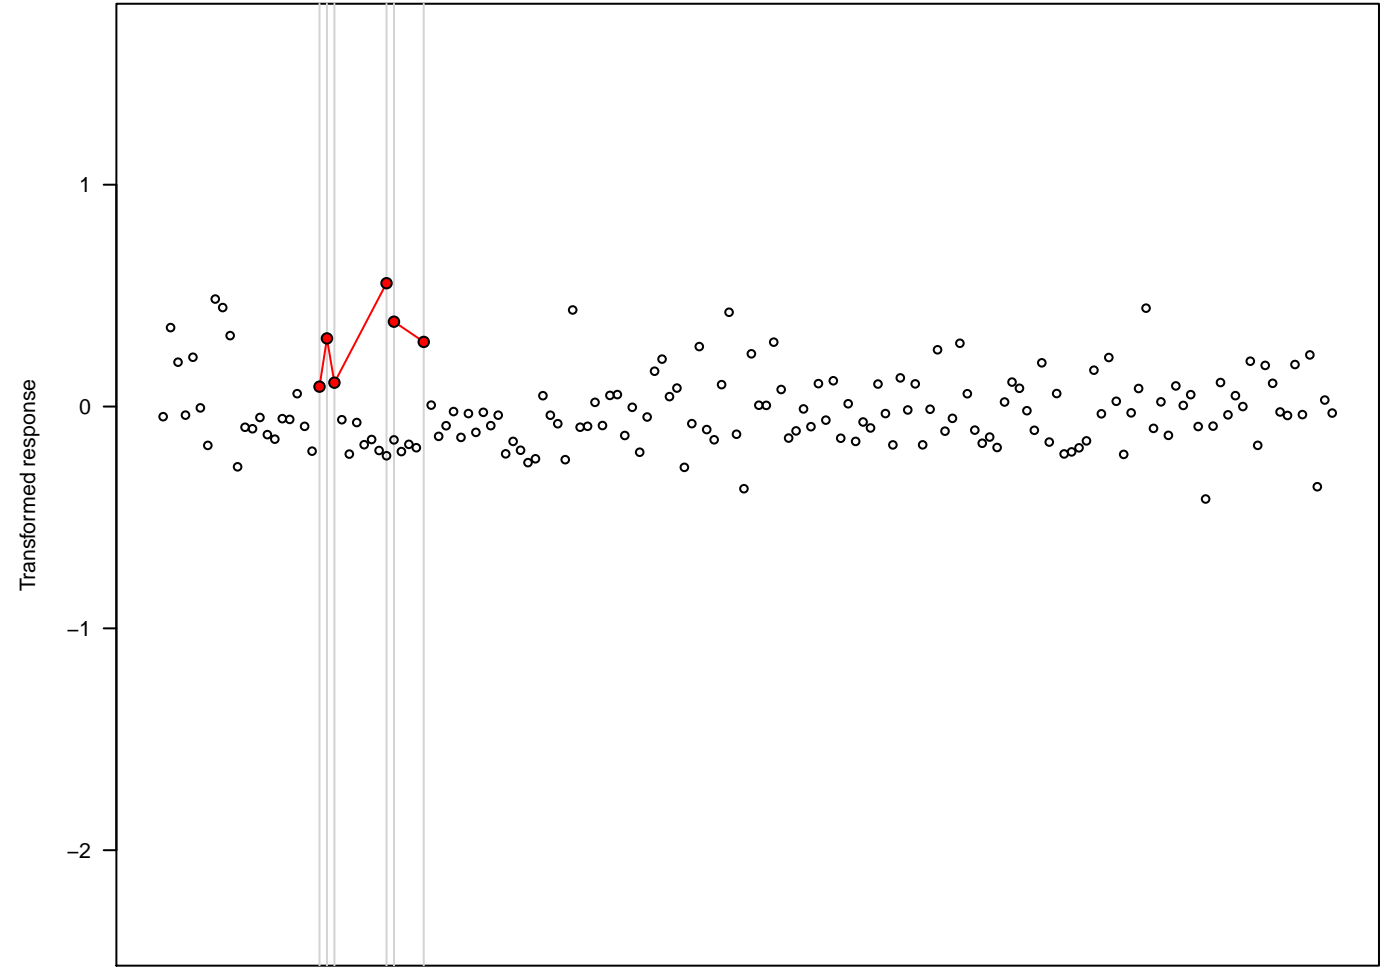

WTSI

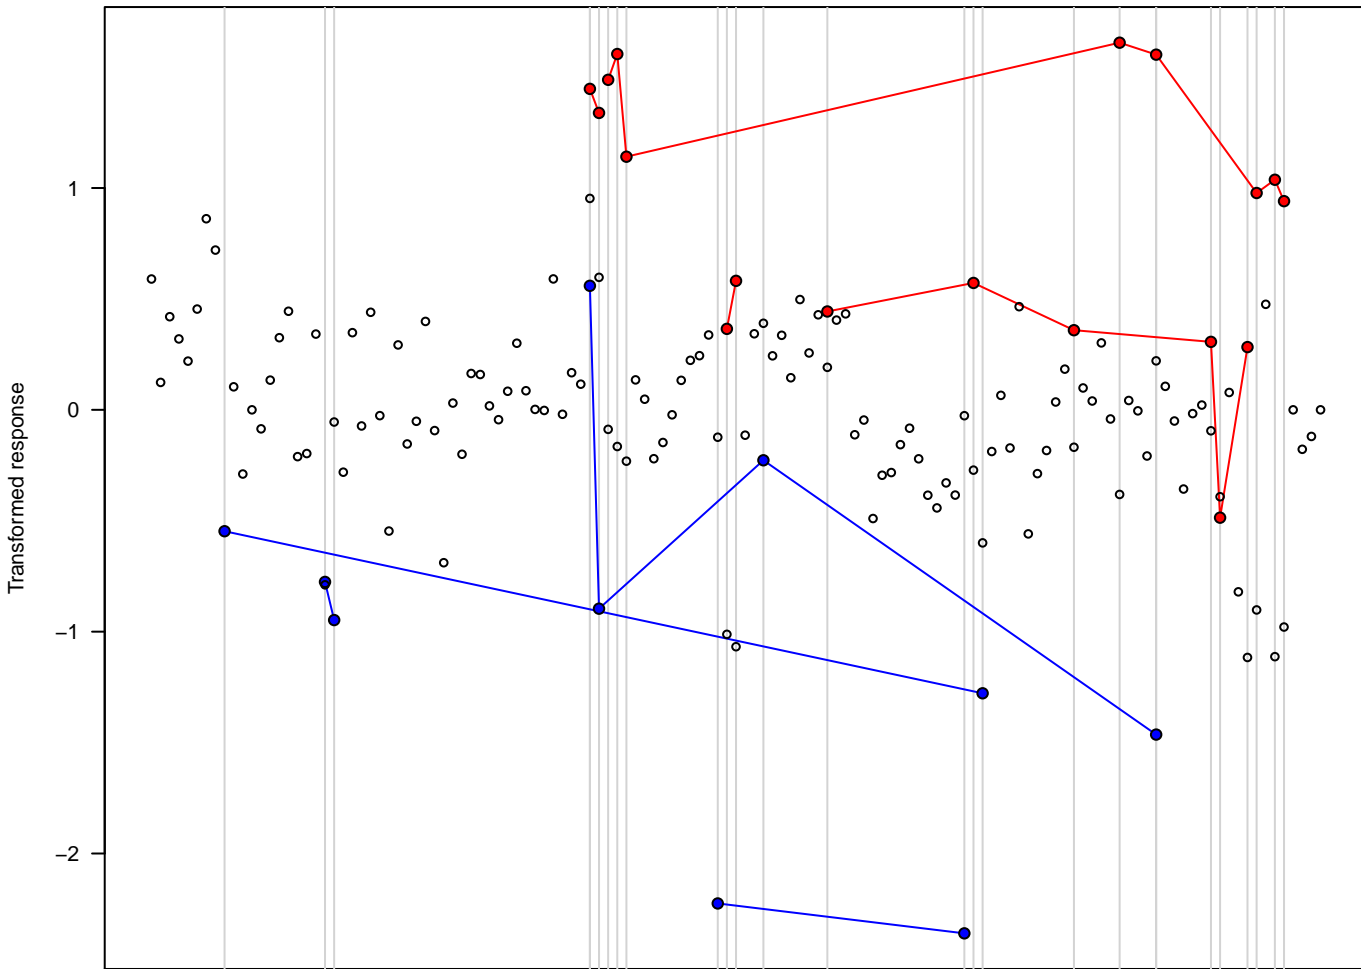

ICS

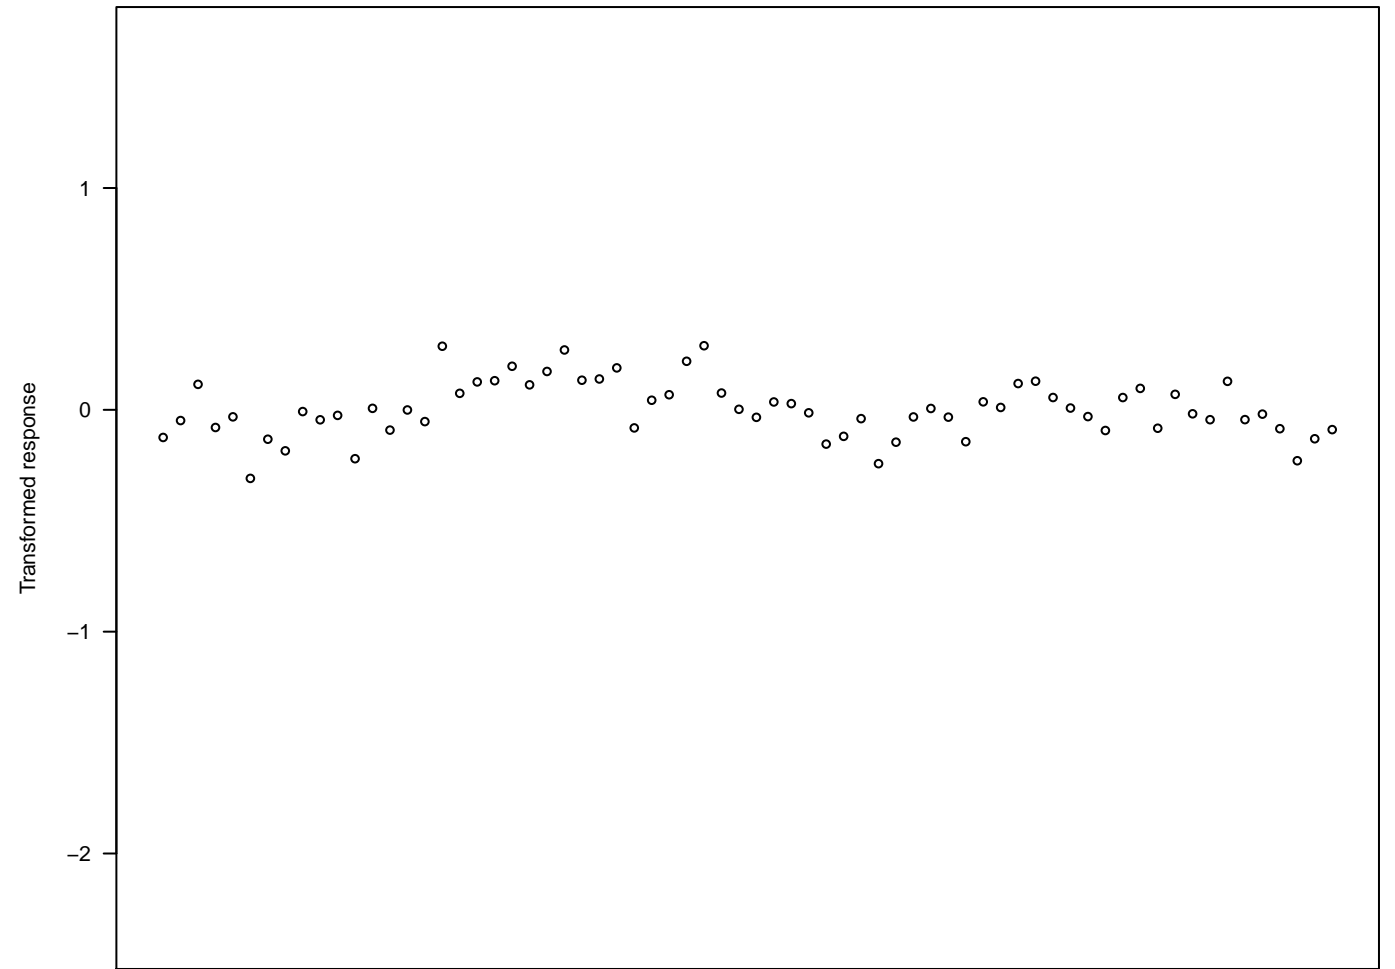

Distance travelled – total  
(Open-field)

HMGU

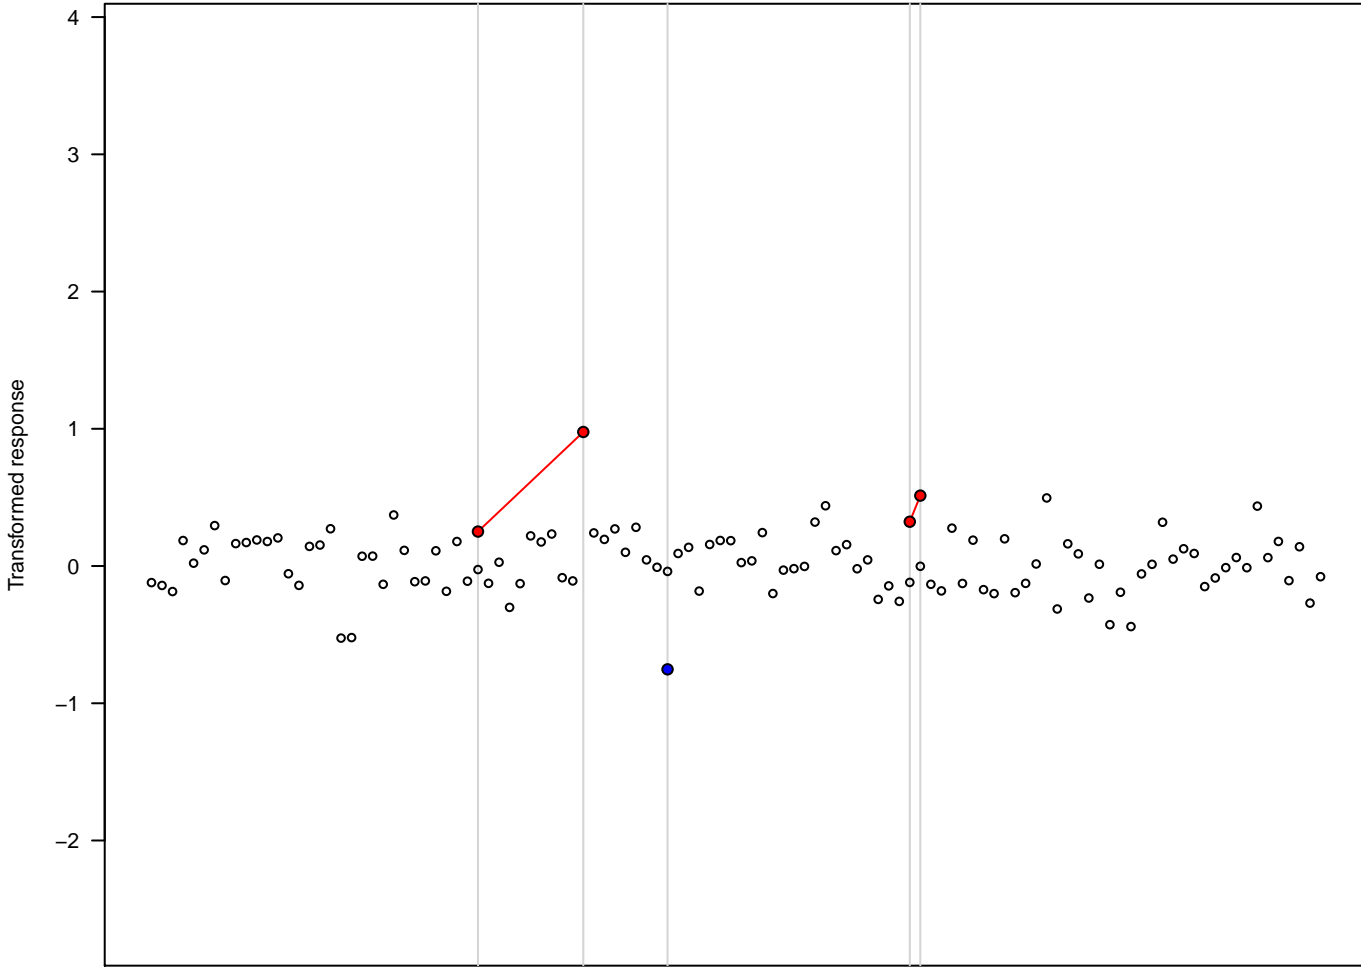

MRC Harwell

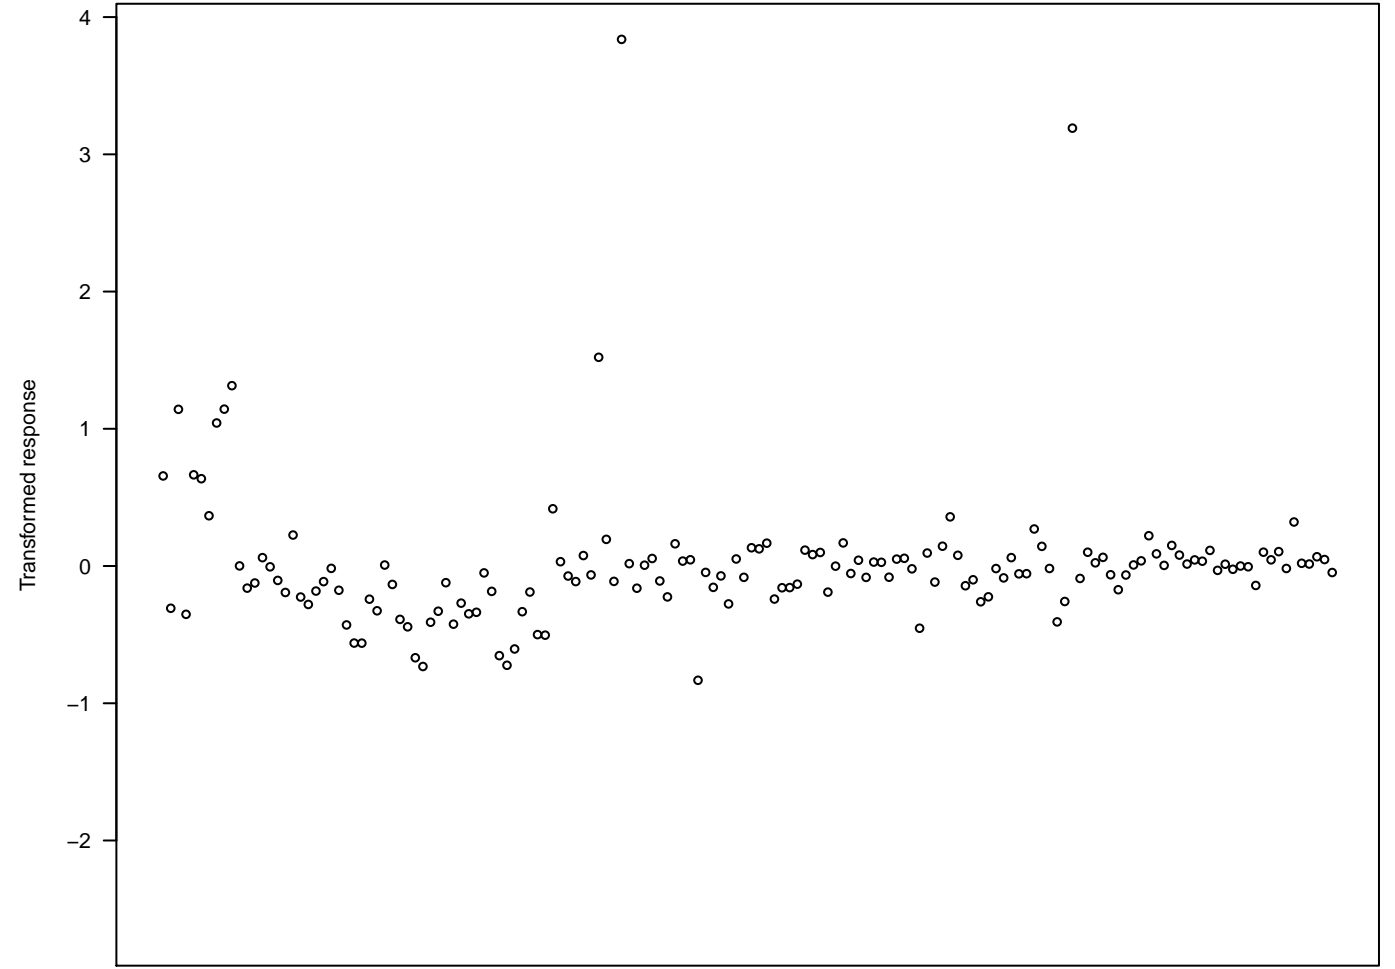

WTSI

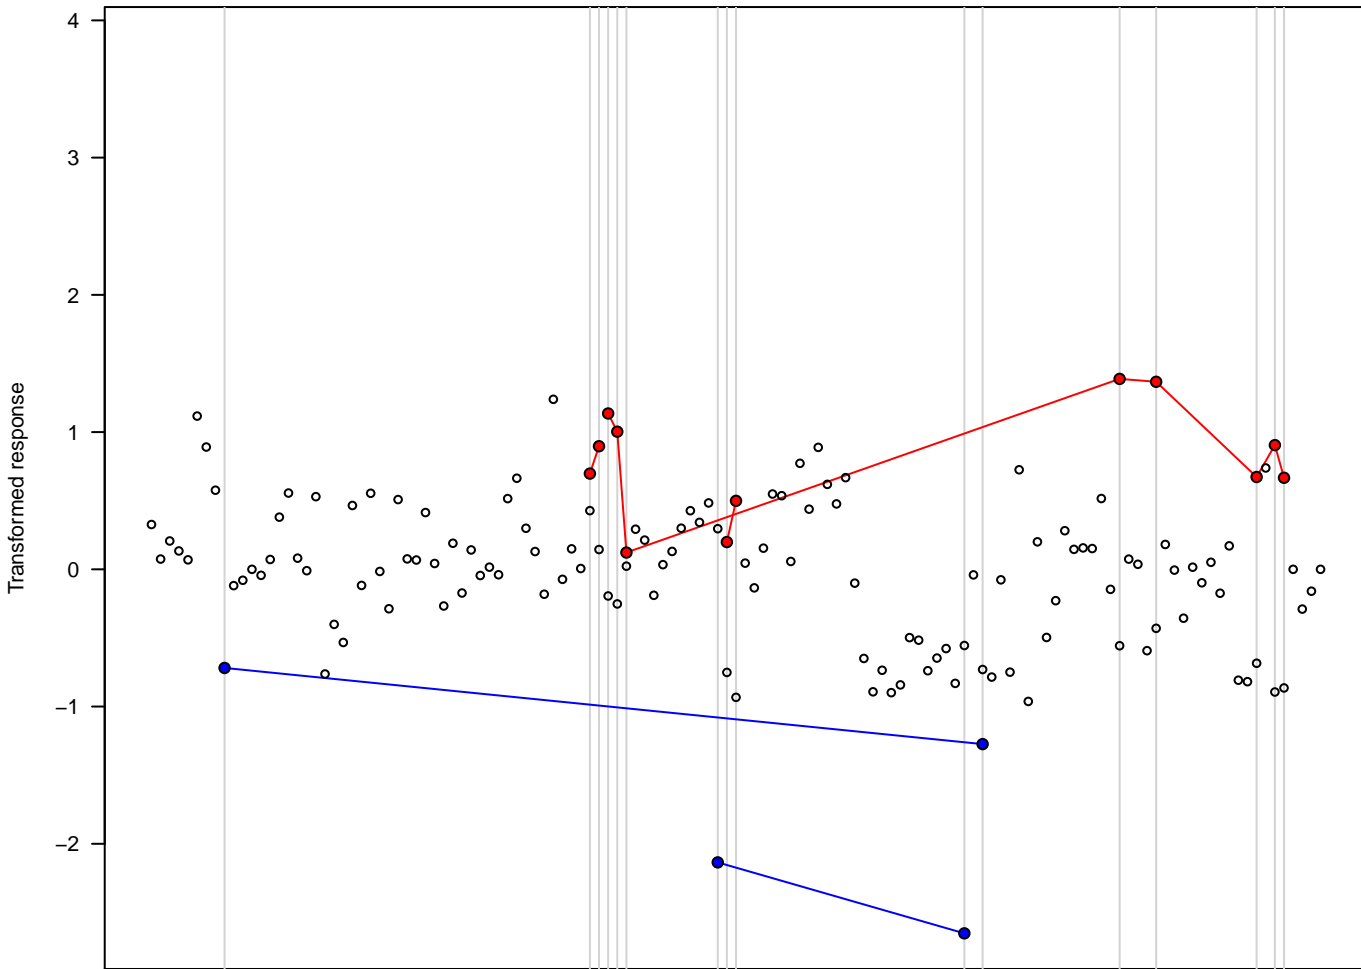

ICS

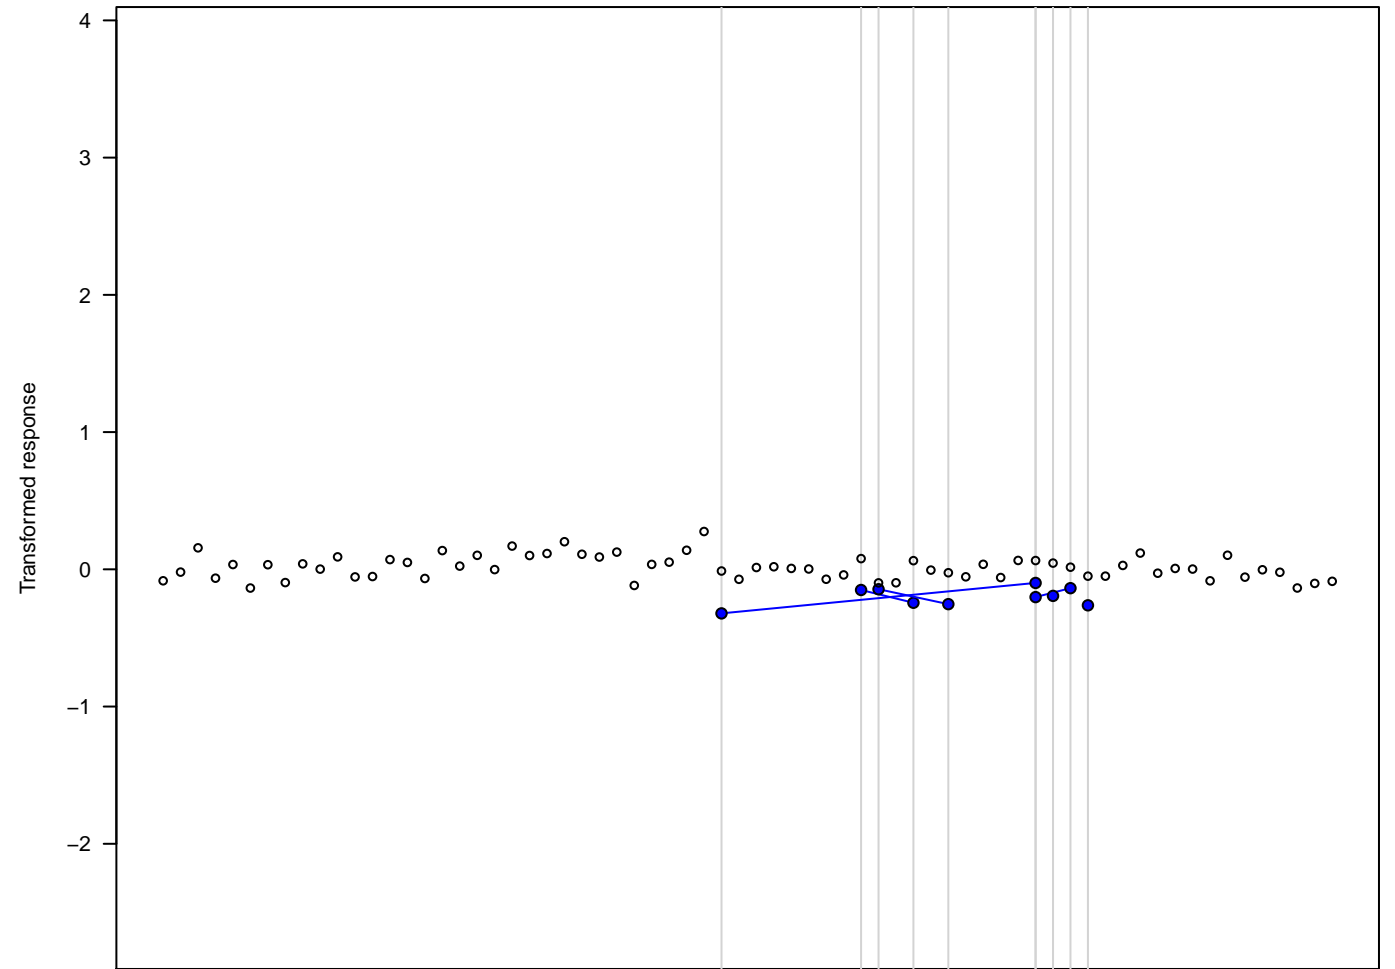

Number of rears – total  
(Open-field)

HMGU

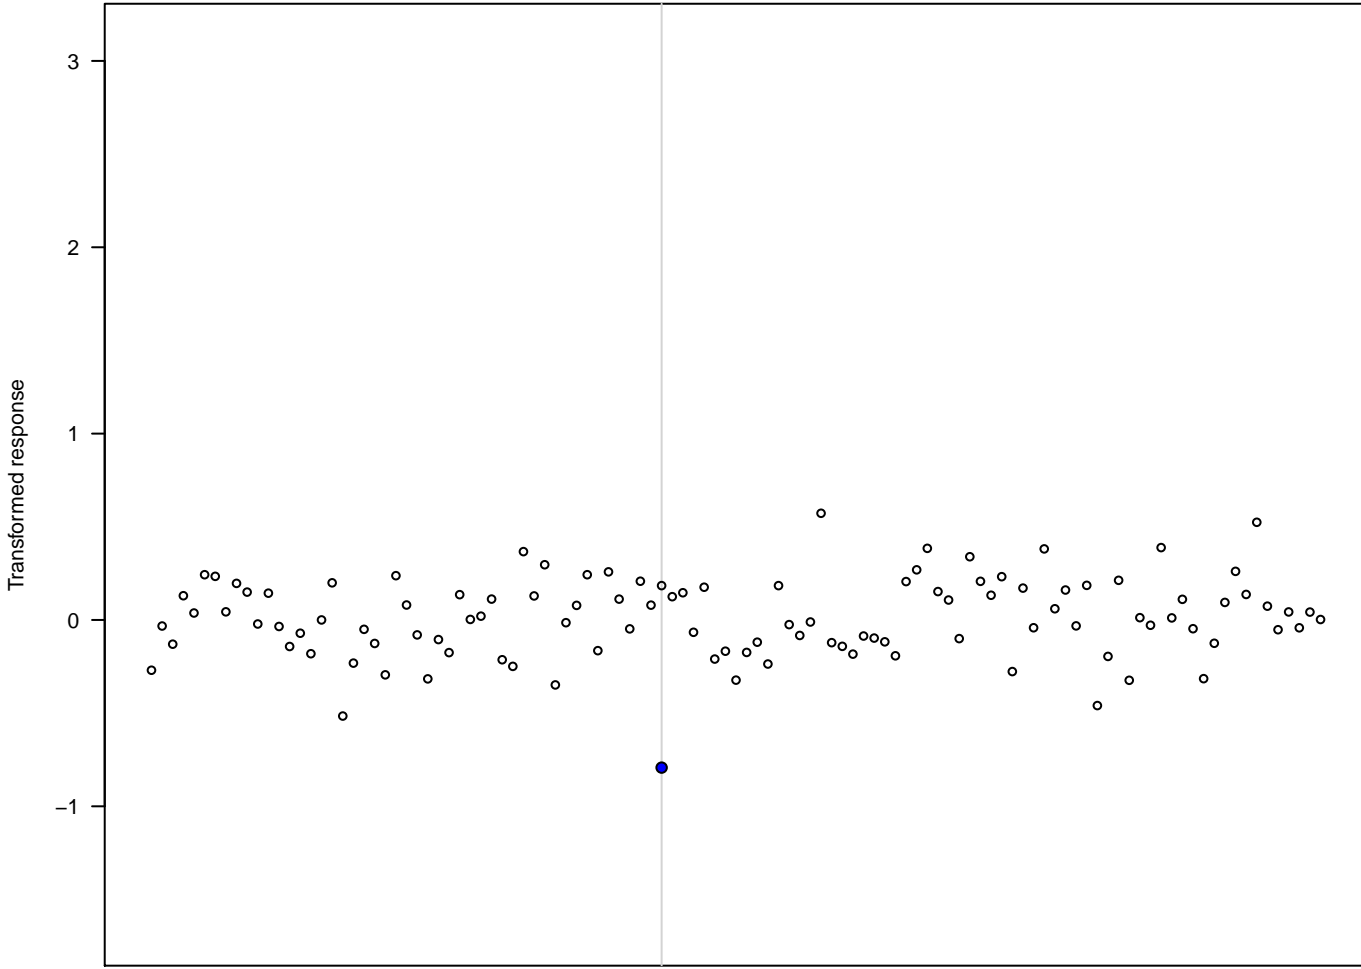

MRC Harwell



WTSI

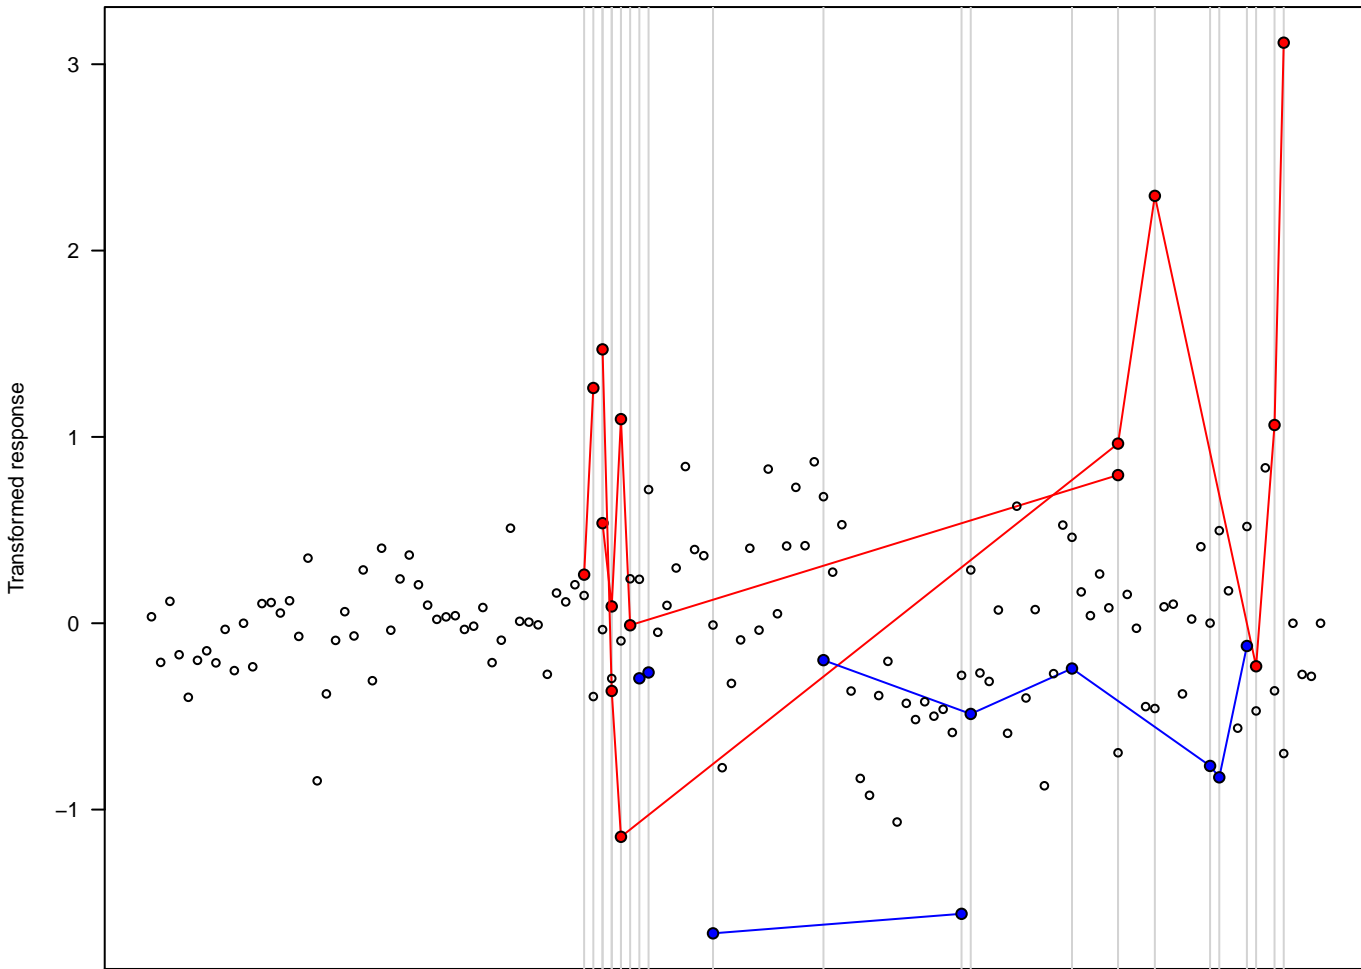

ICS

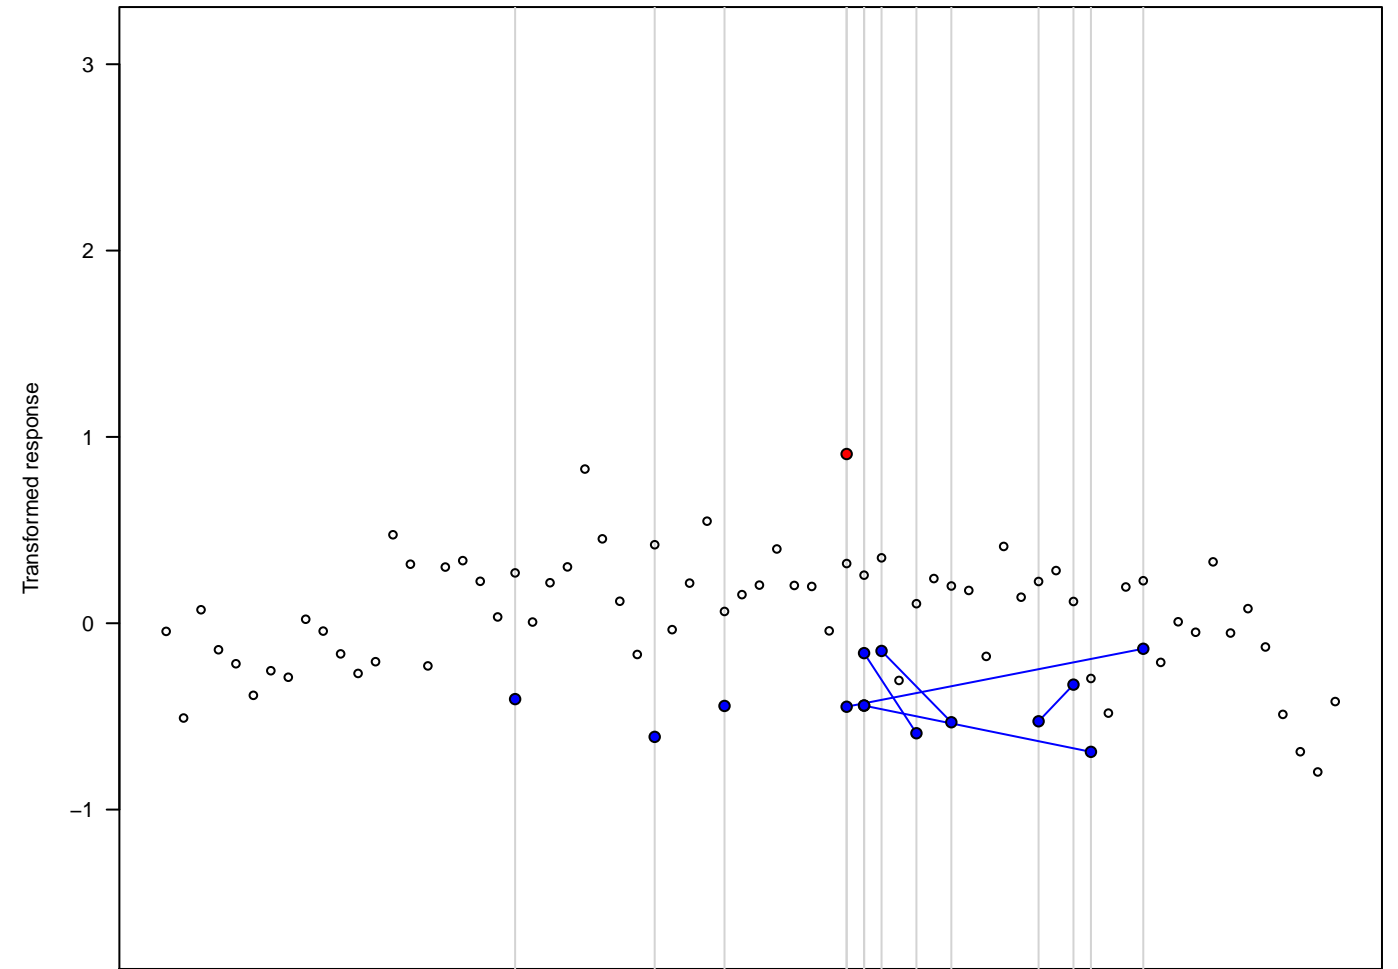

Percentage centre time  
(Open-field)

HMGU

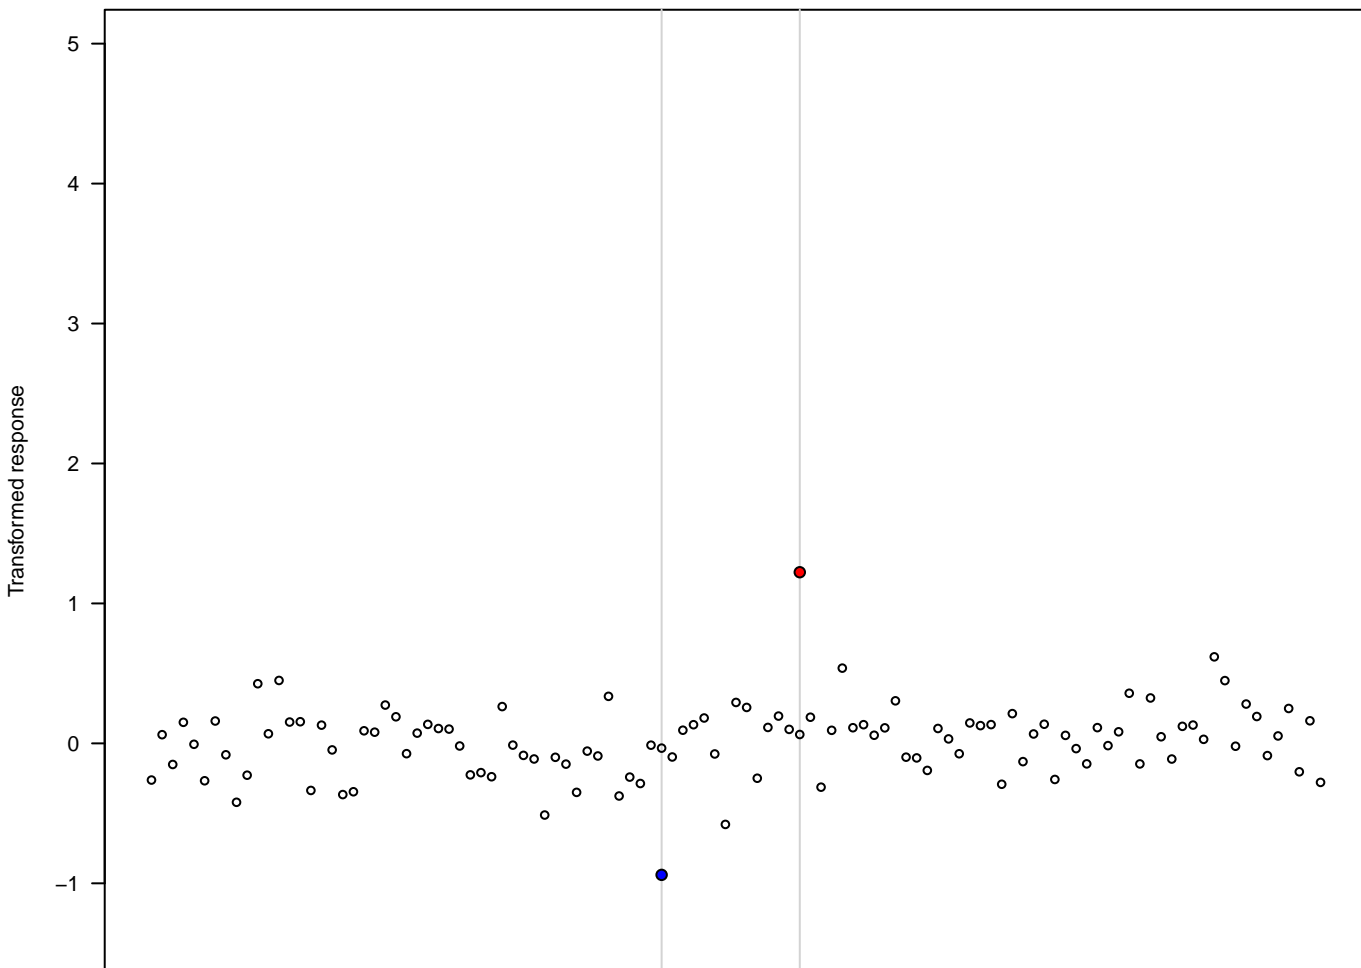

MRC Harwell

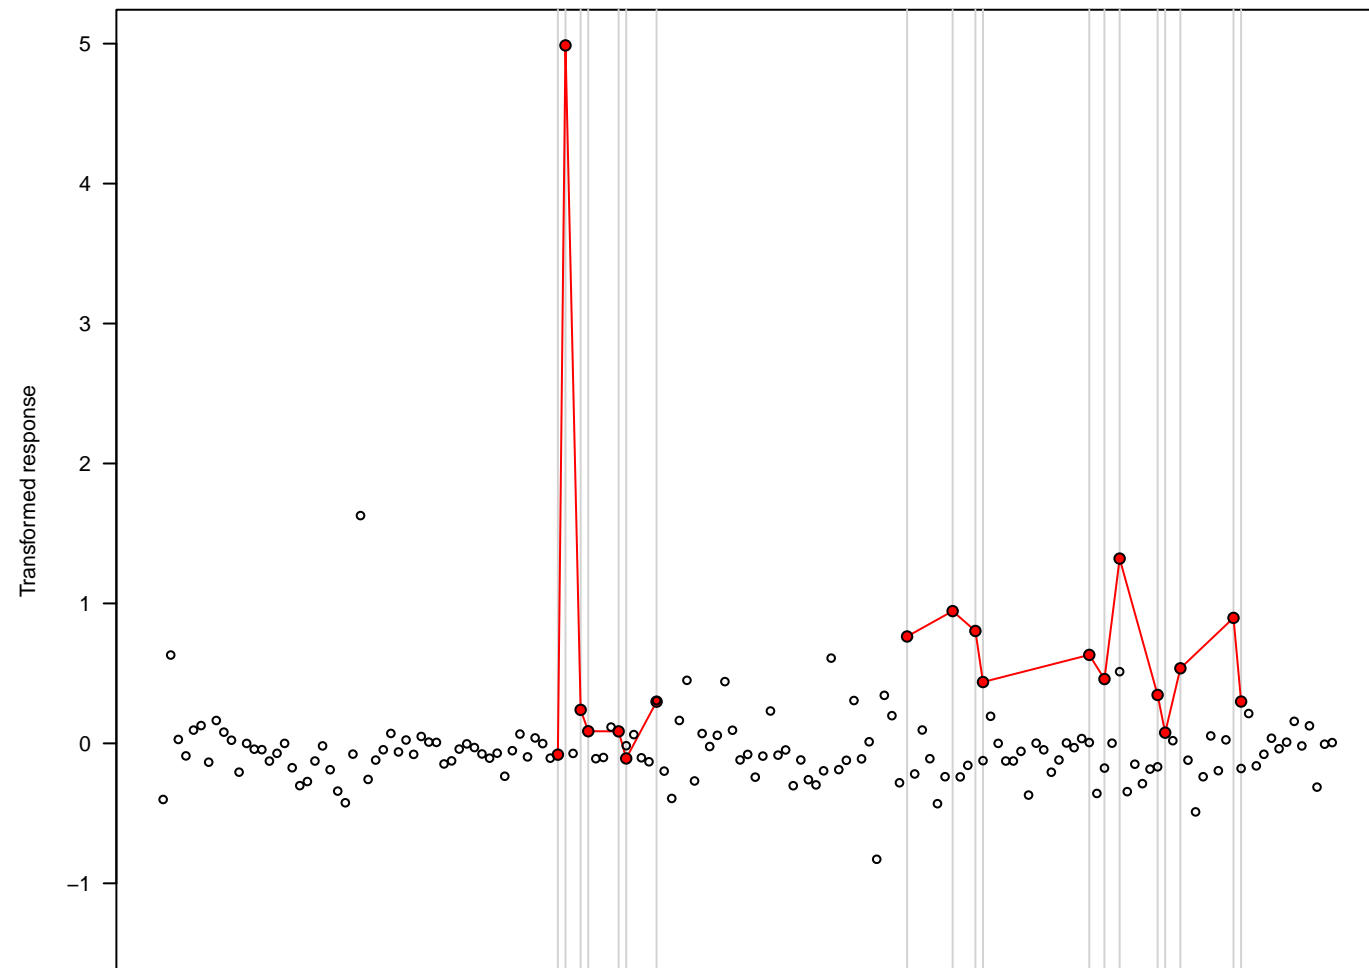

WTSI

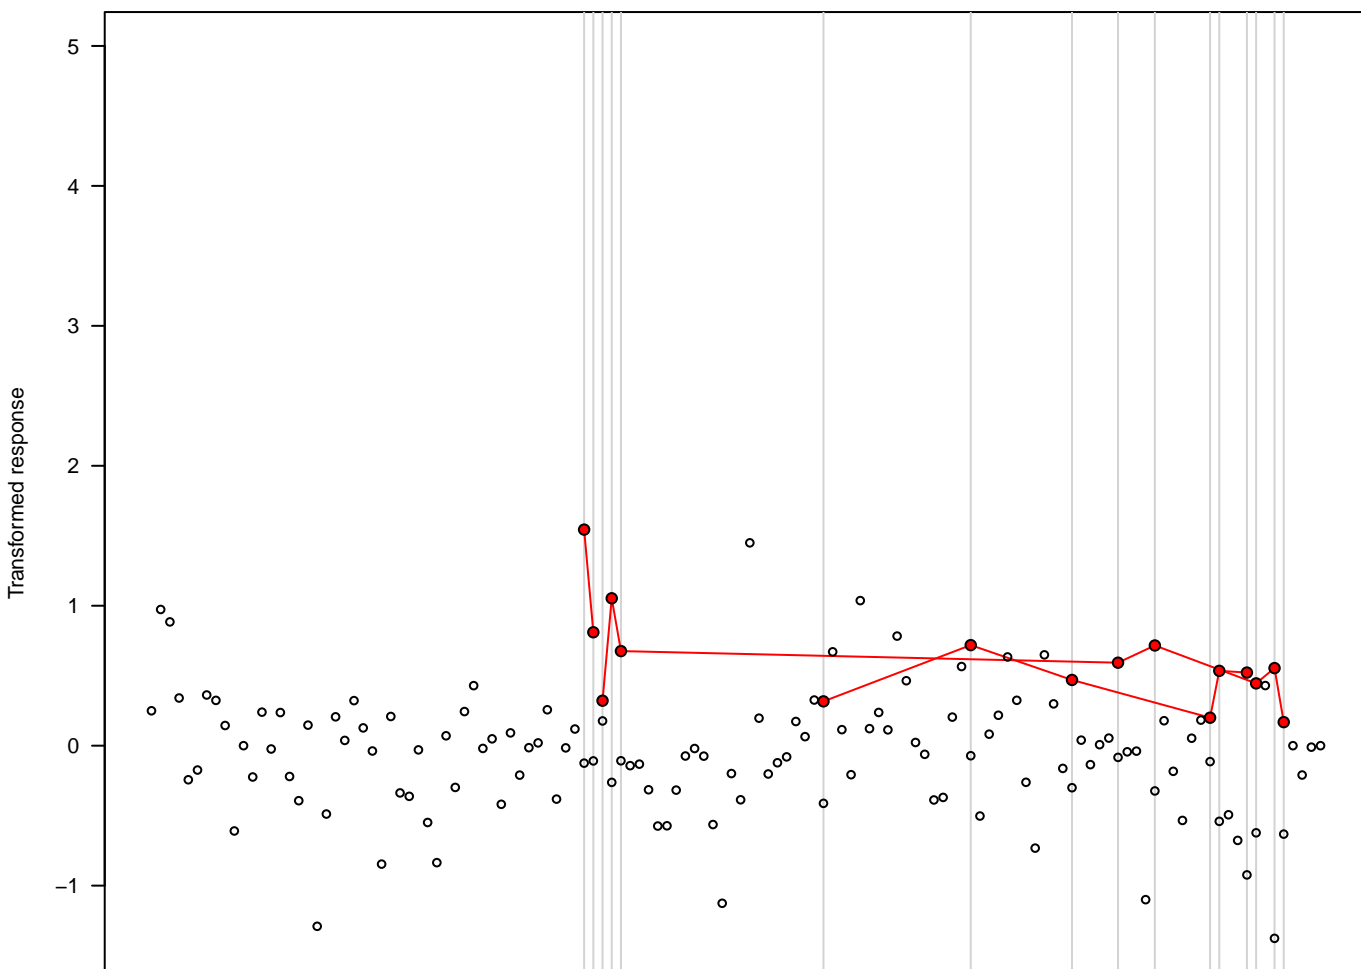

ICS

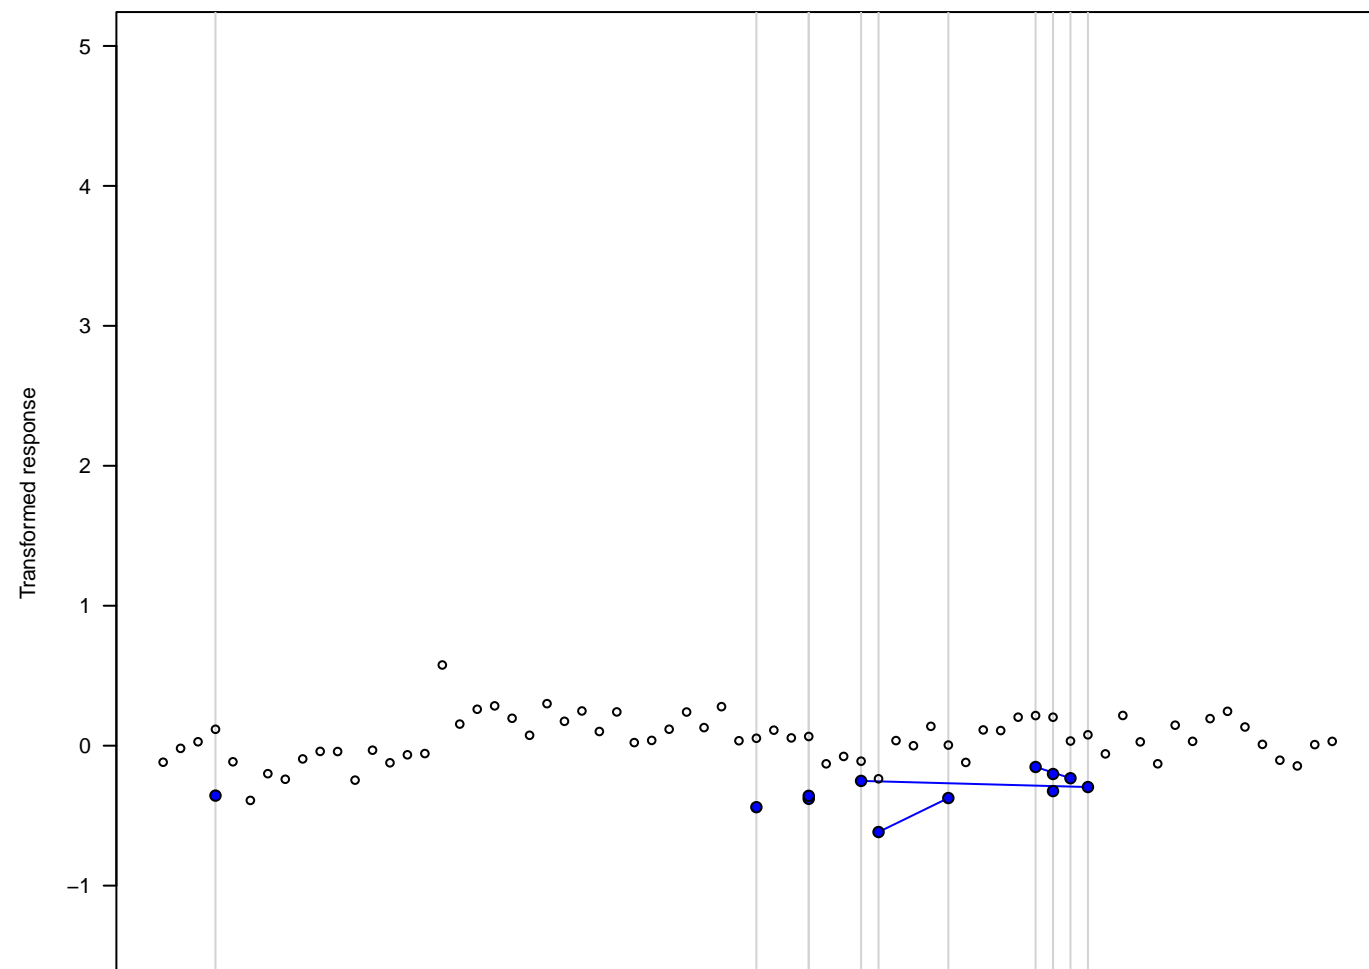

Locomotor activity  
(Modified SHIRPA)

HMGU

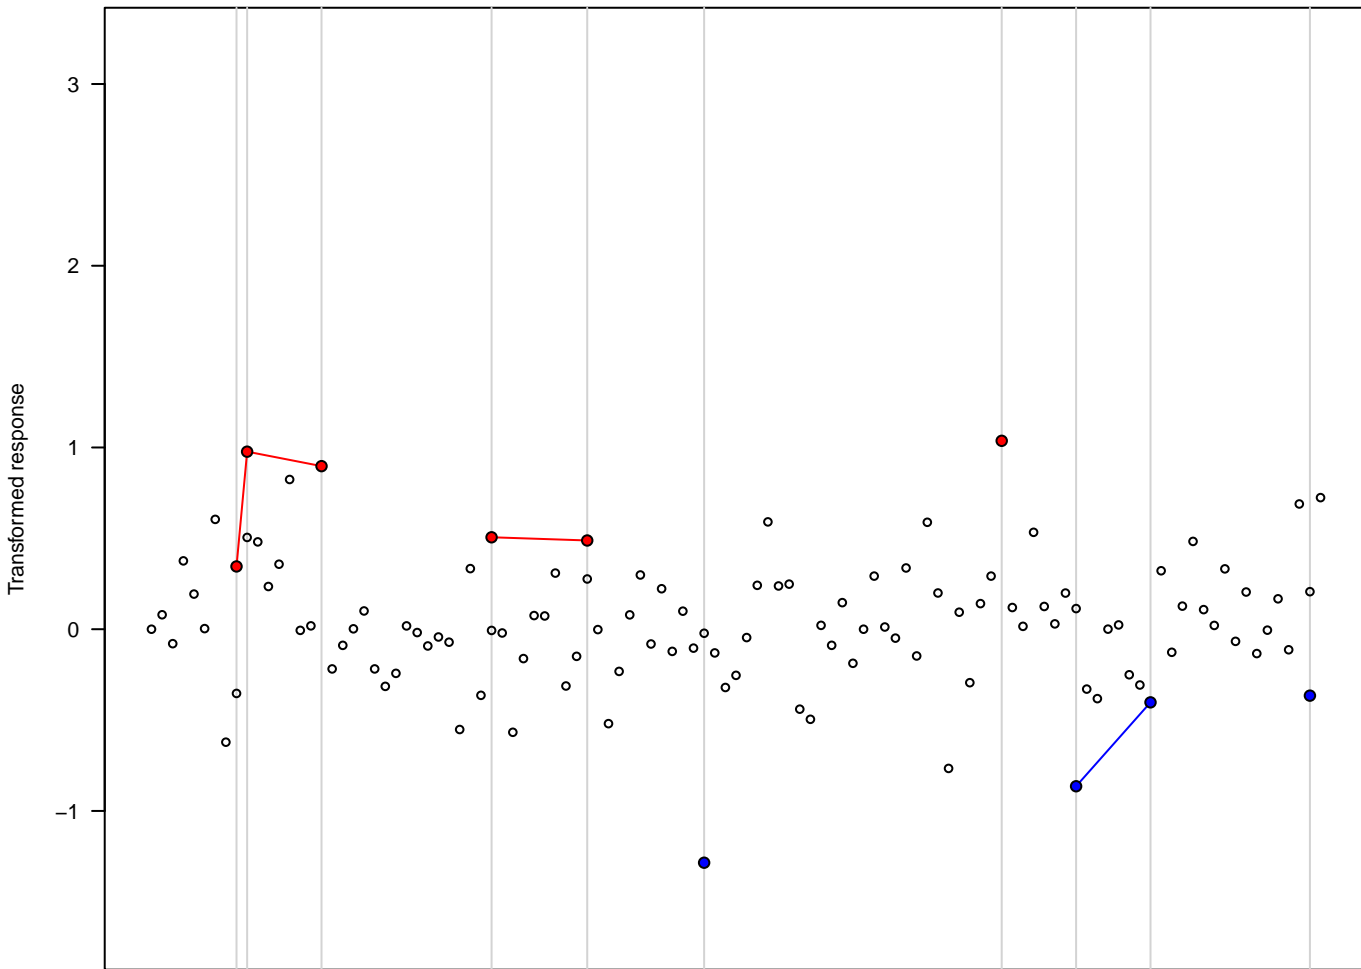

MRC Harwell

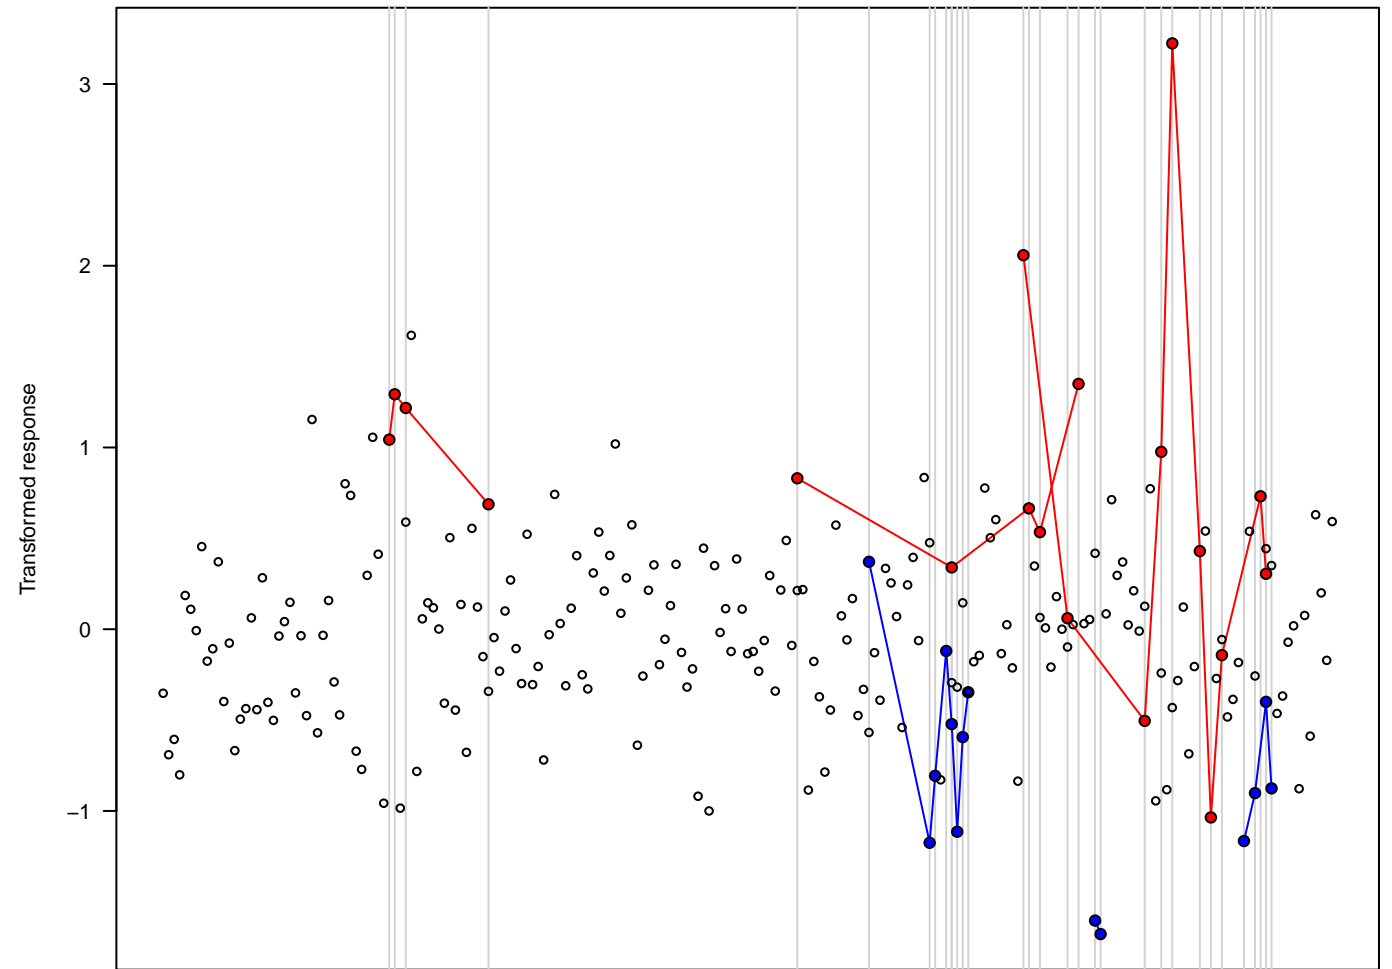

WTSI

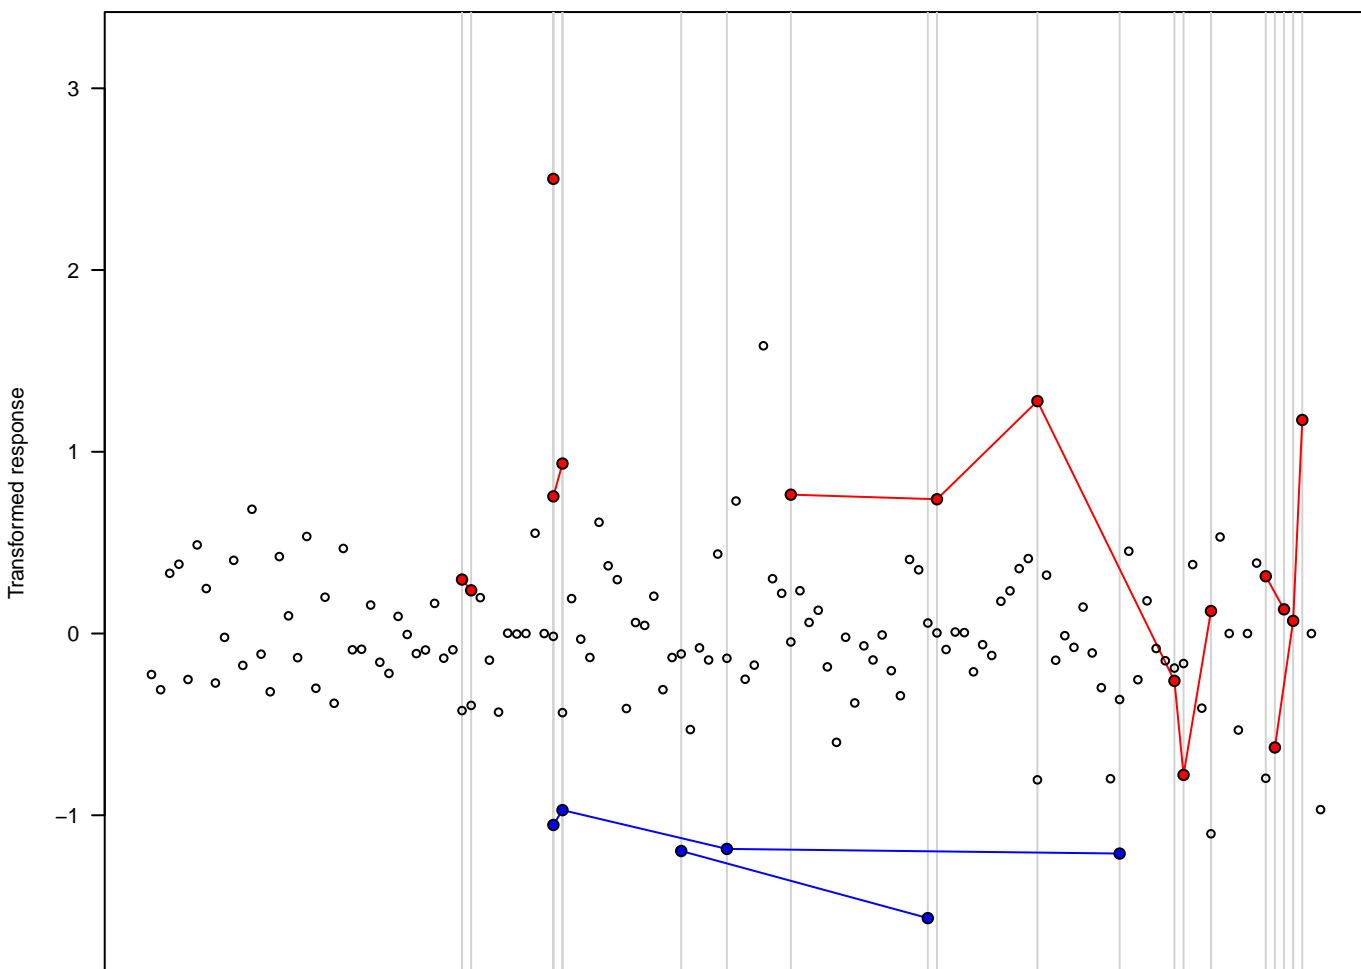

ICS

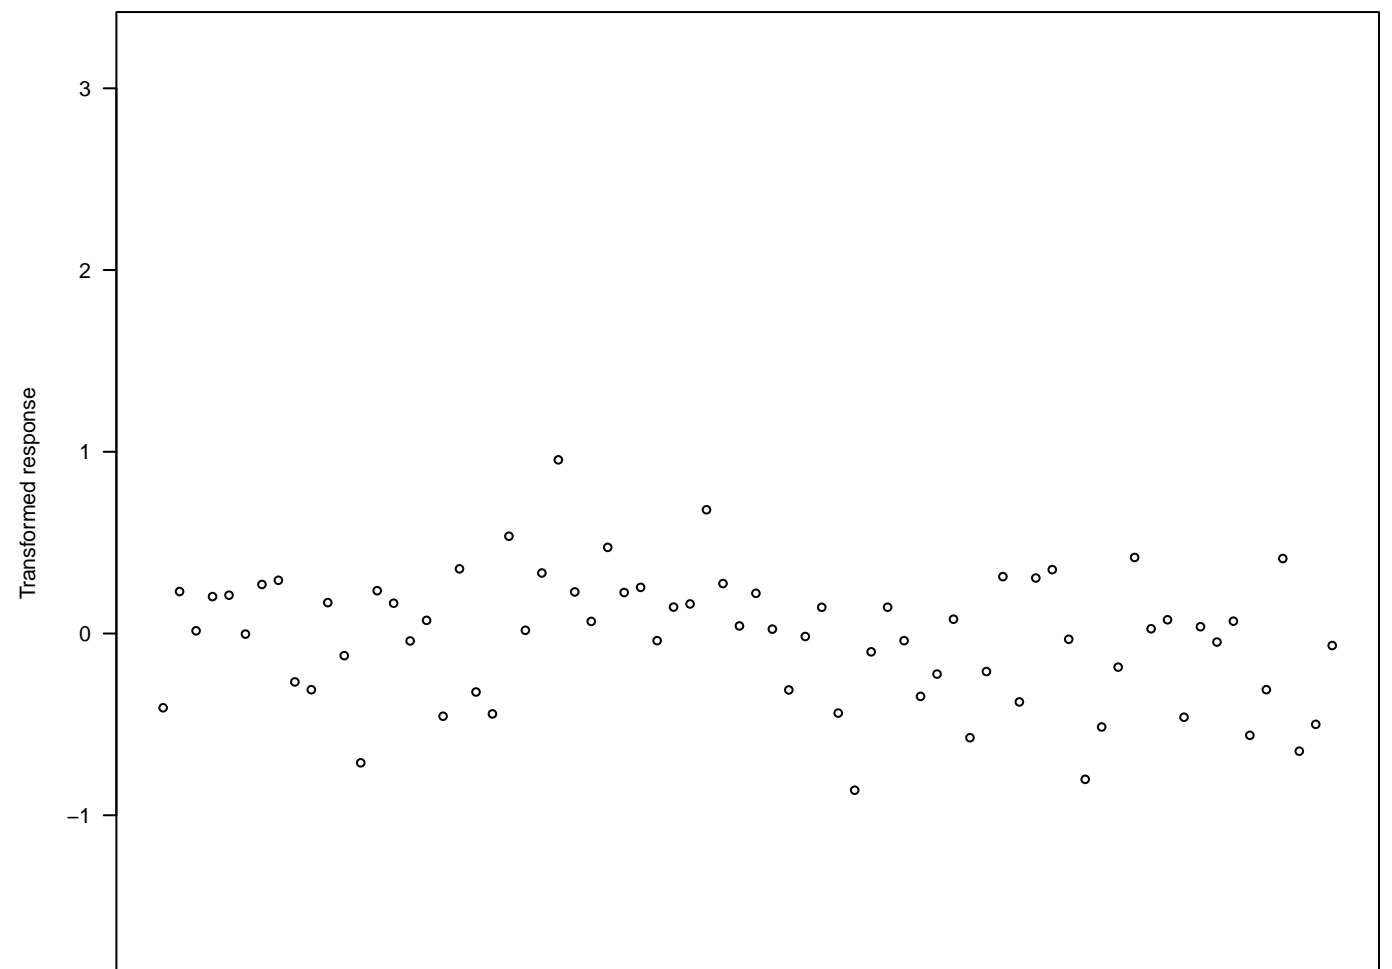



Forelimb grip strength measurement mean  
(Grip strength)

HMGU

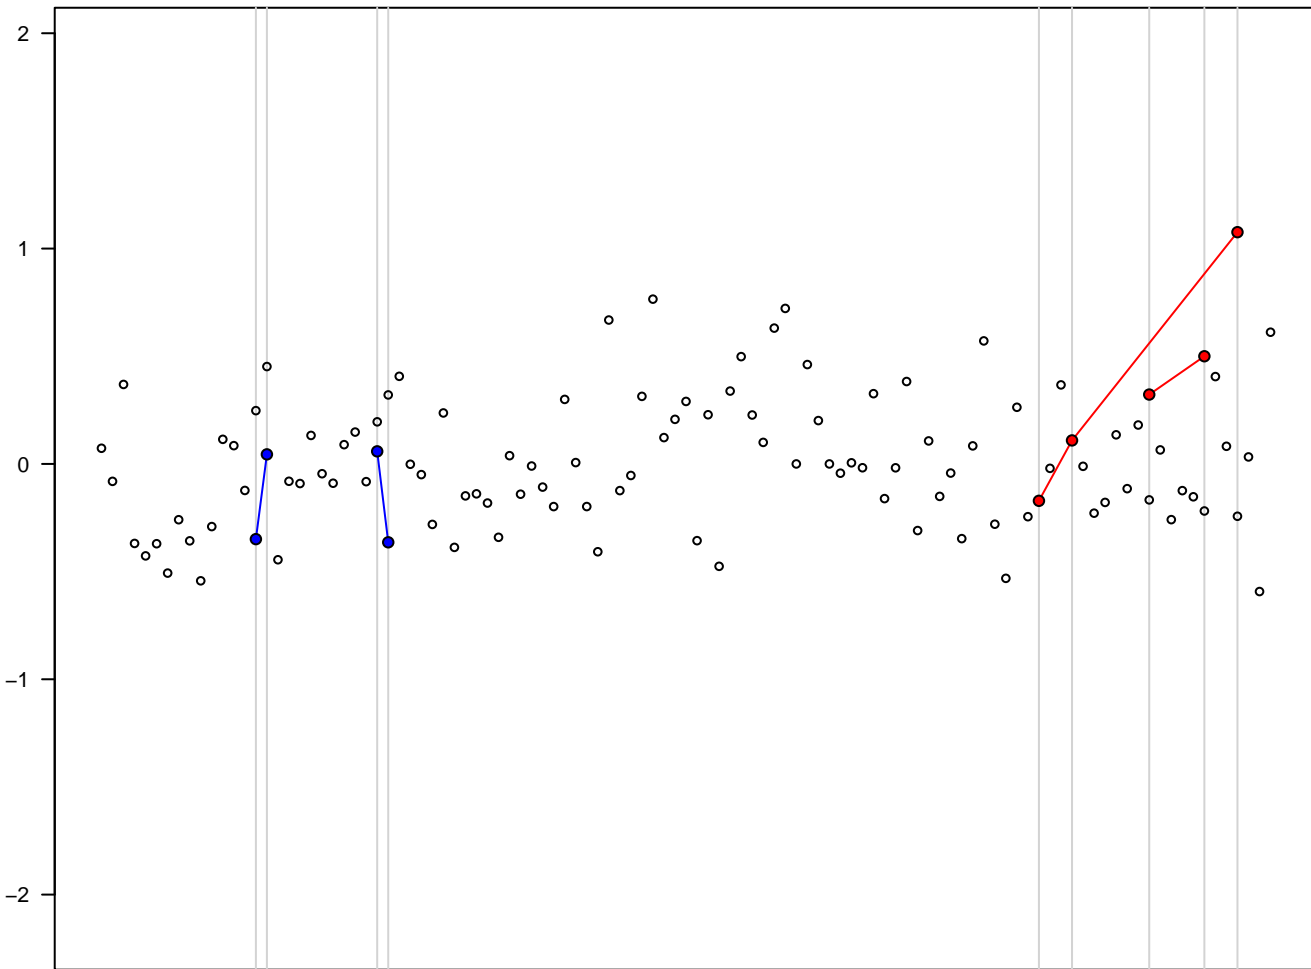

MRC Harwell

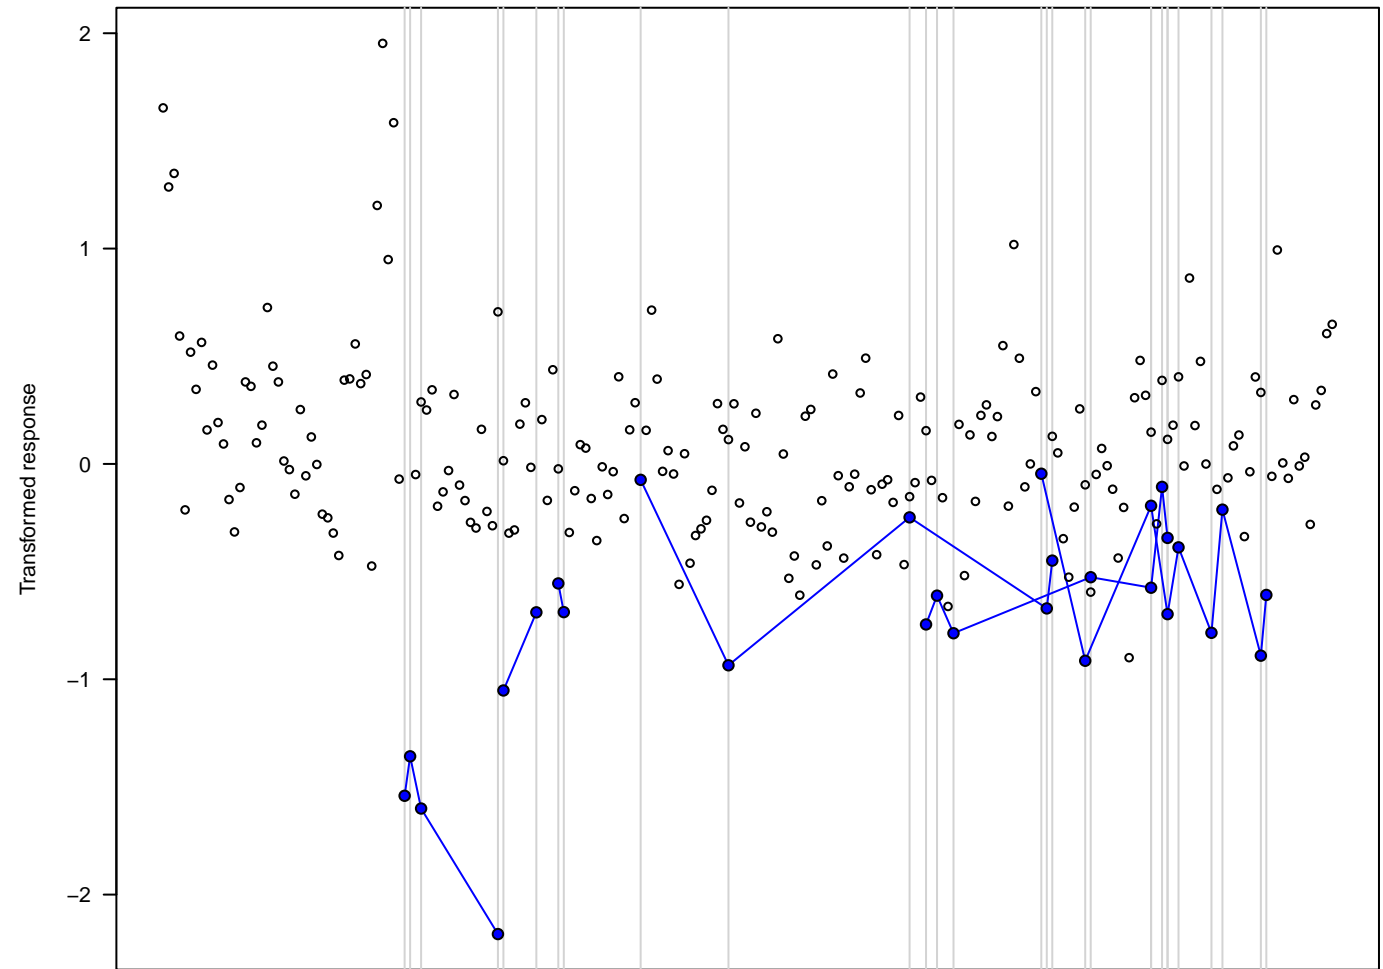

WTSI

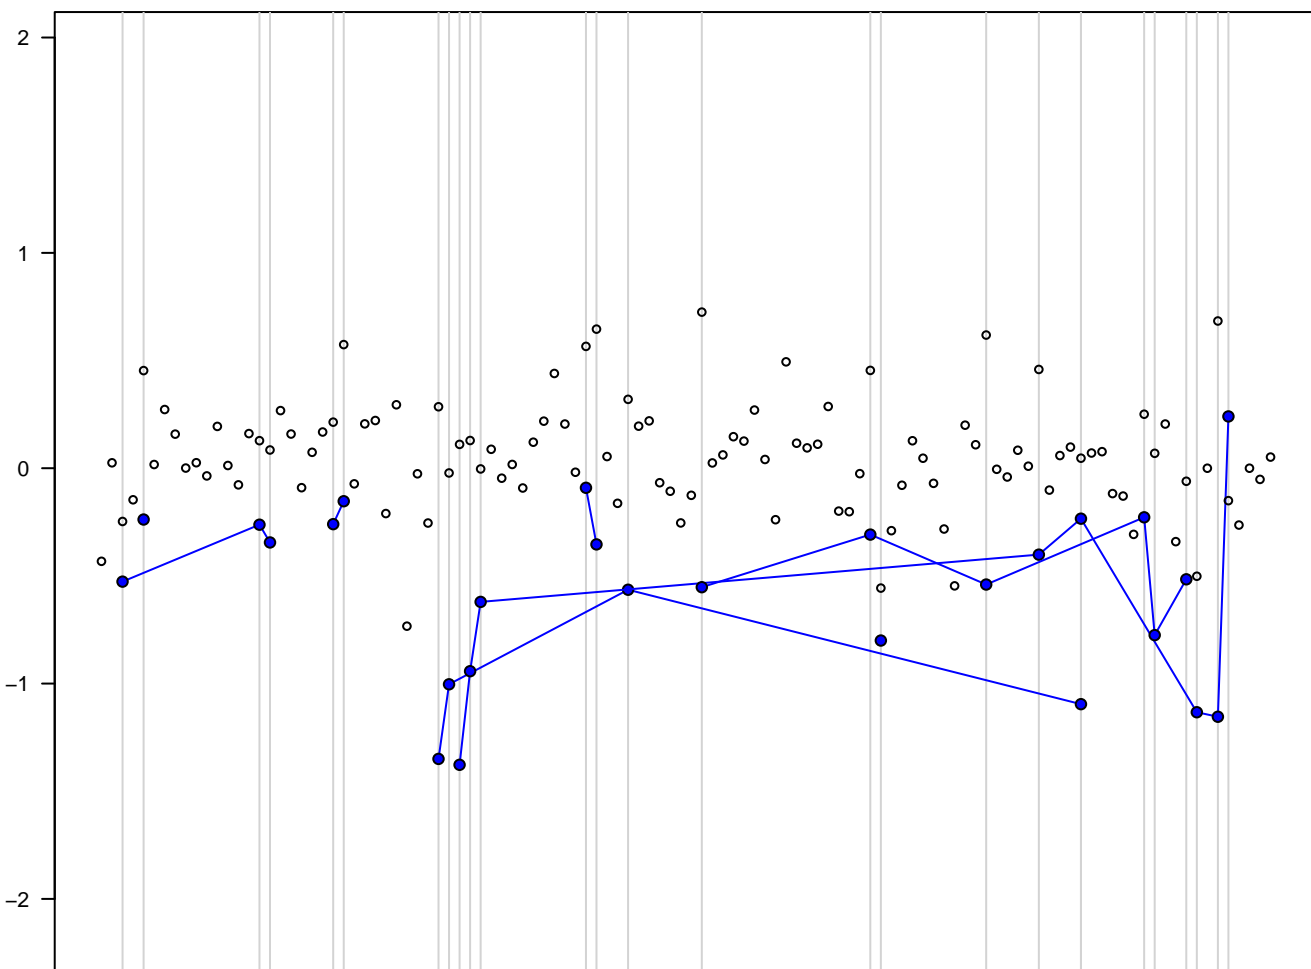

ICS

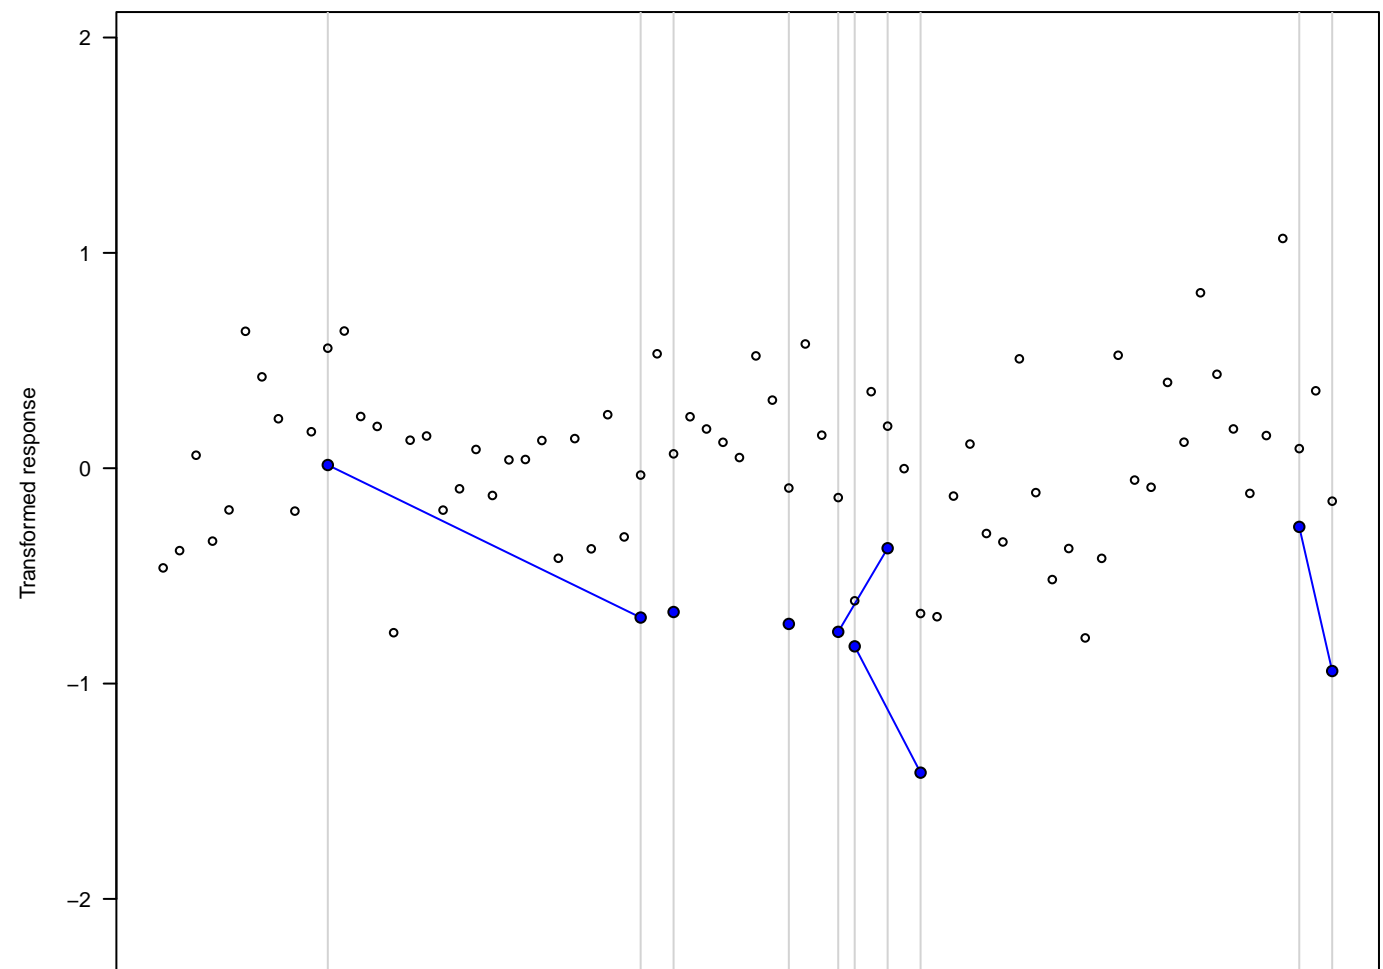

Forelimb and hindlimb grip strength measurement mean  
(Grip strength)

HMGU

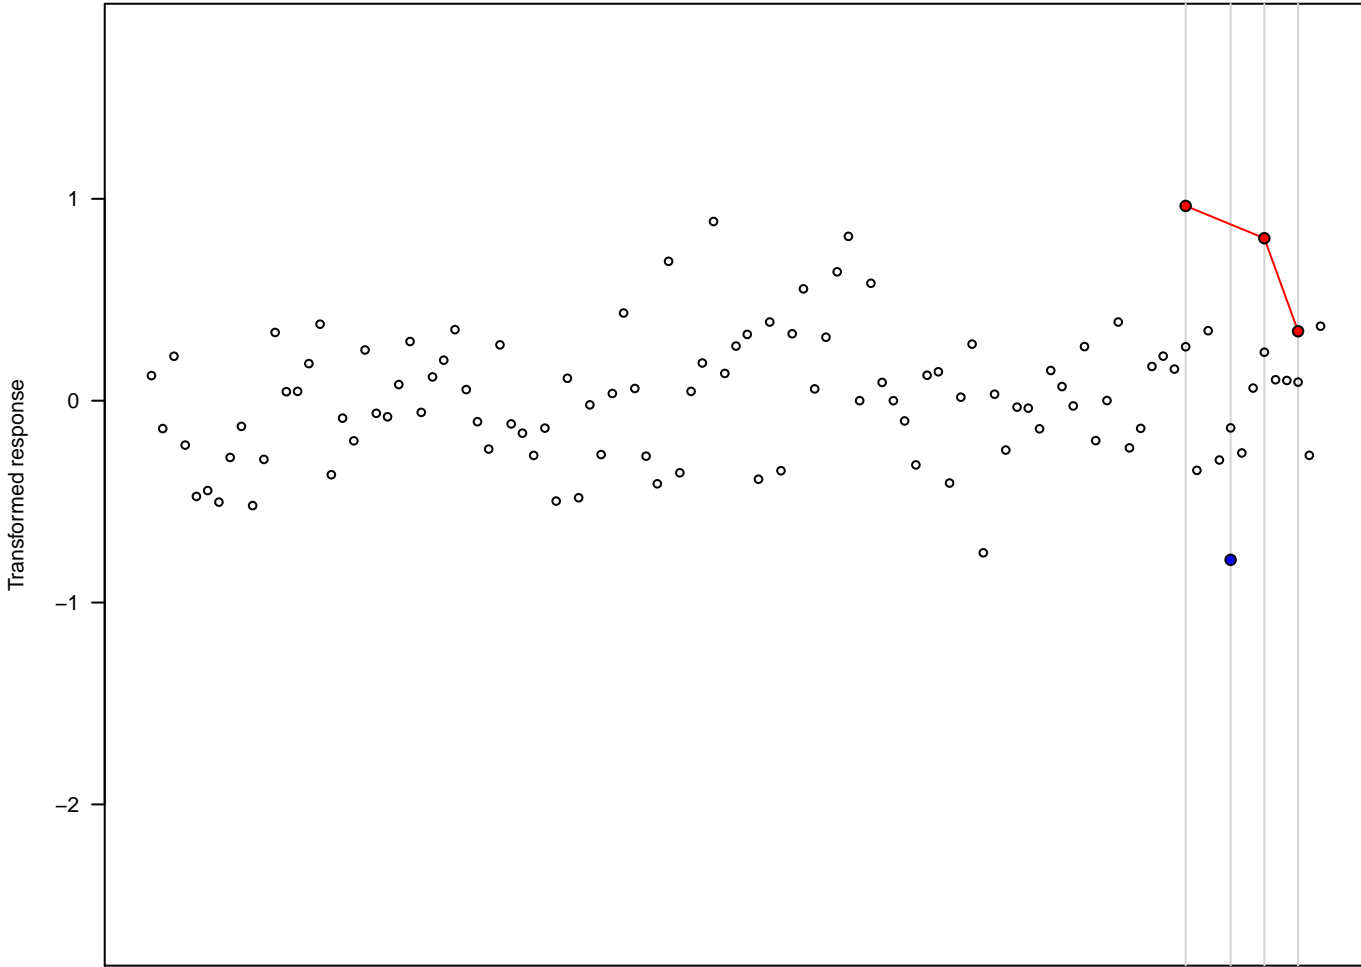

MRC Harwell

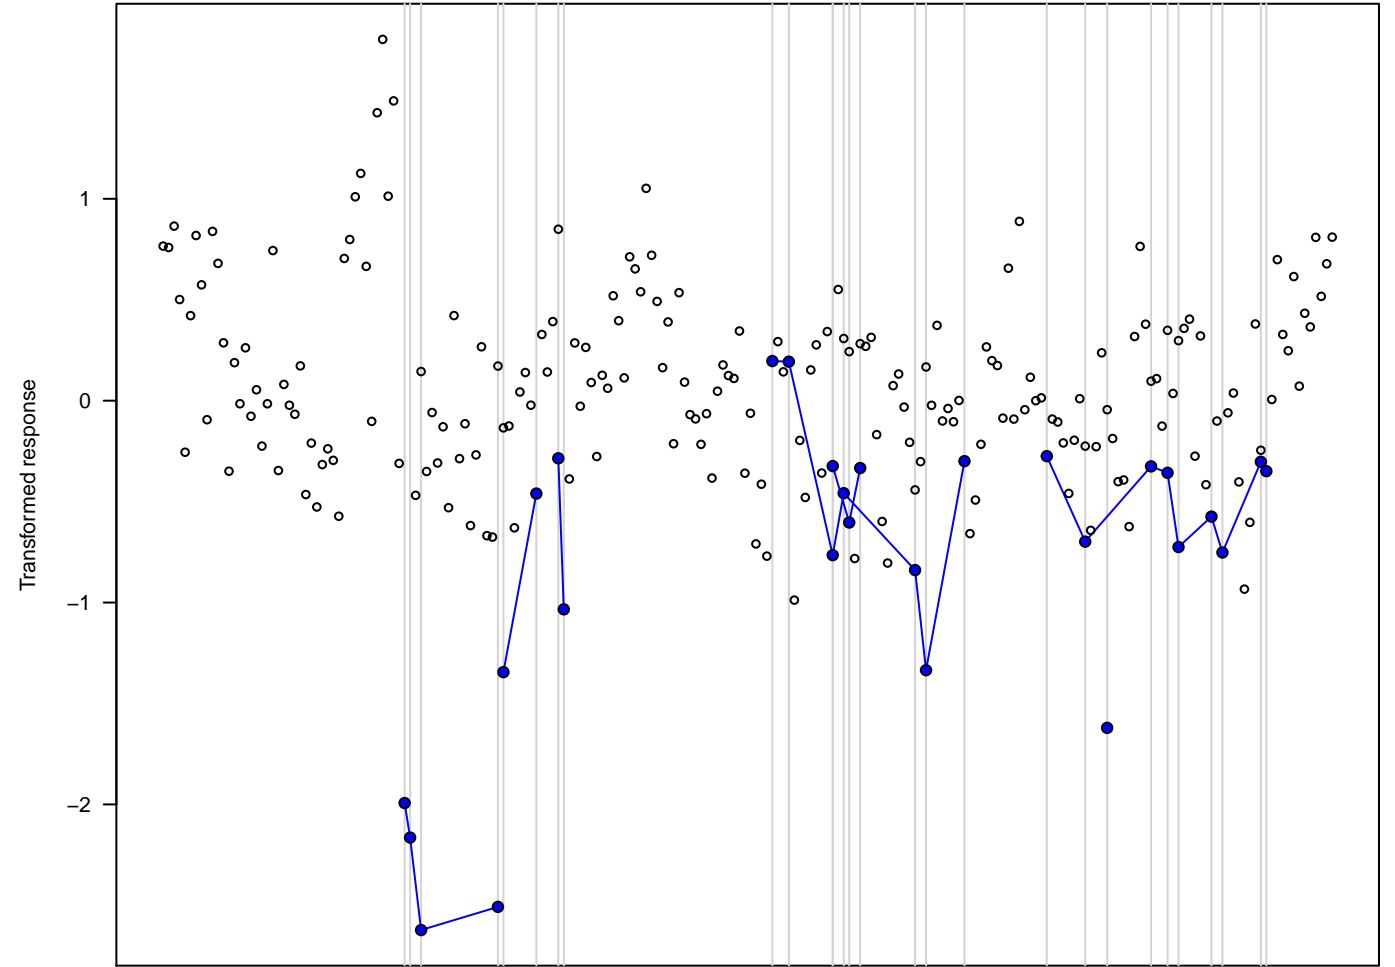

WTSI

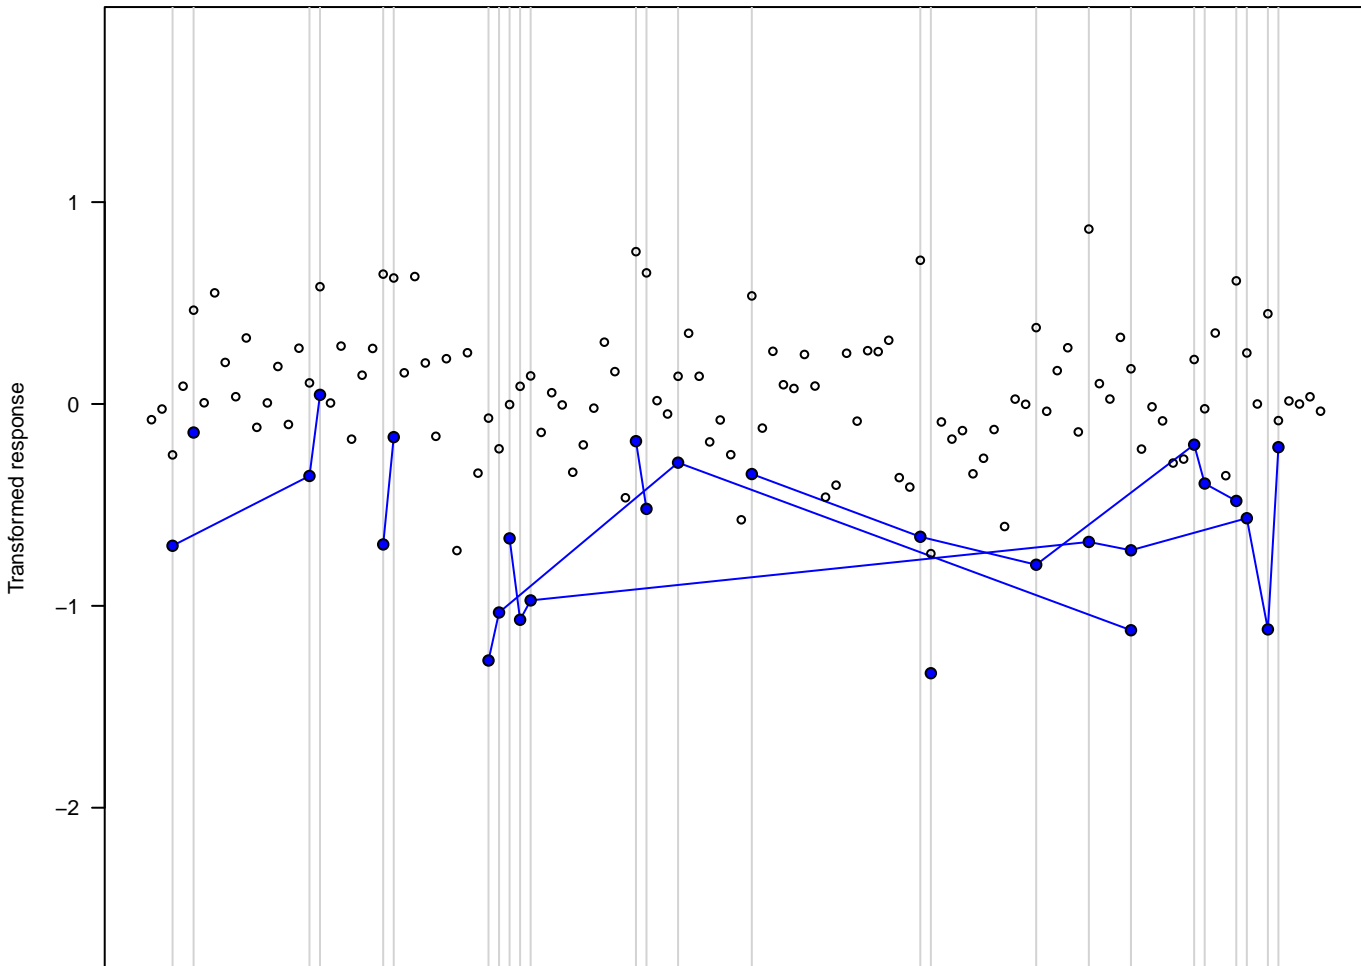

ICS

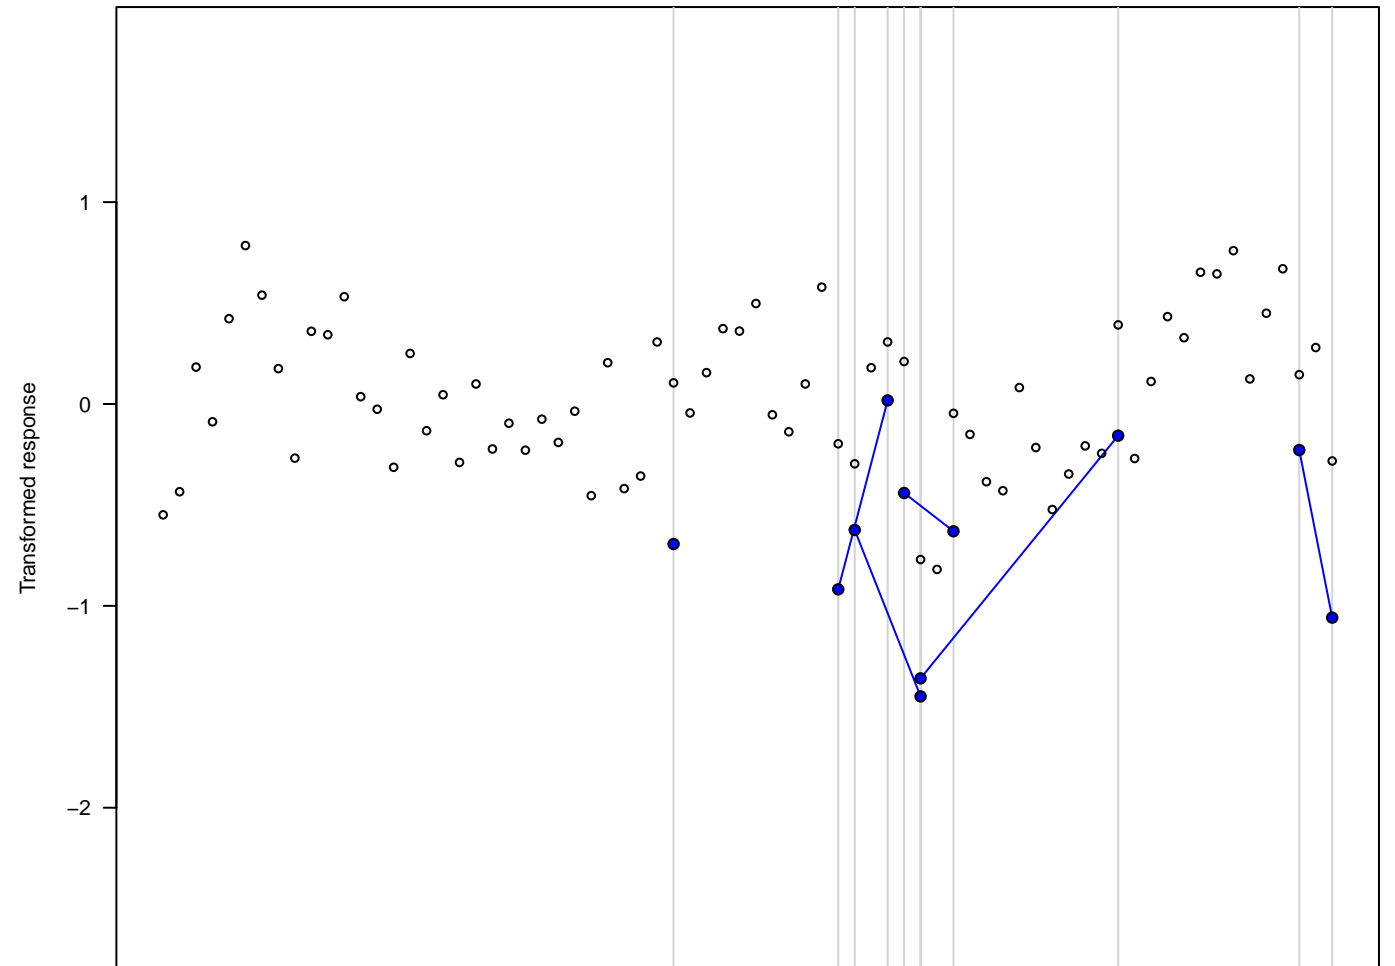

Forelimb grip strength normalised against body weight  
(Grip strength)

HMGU

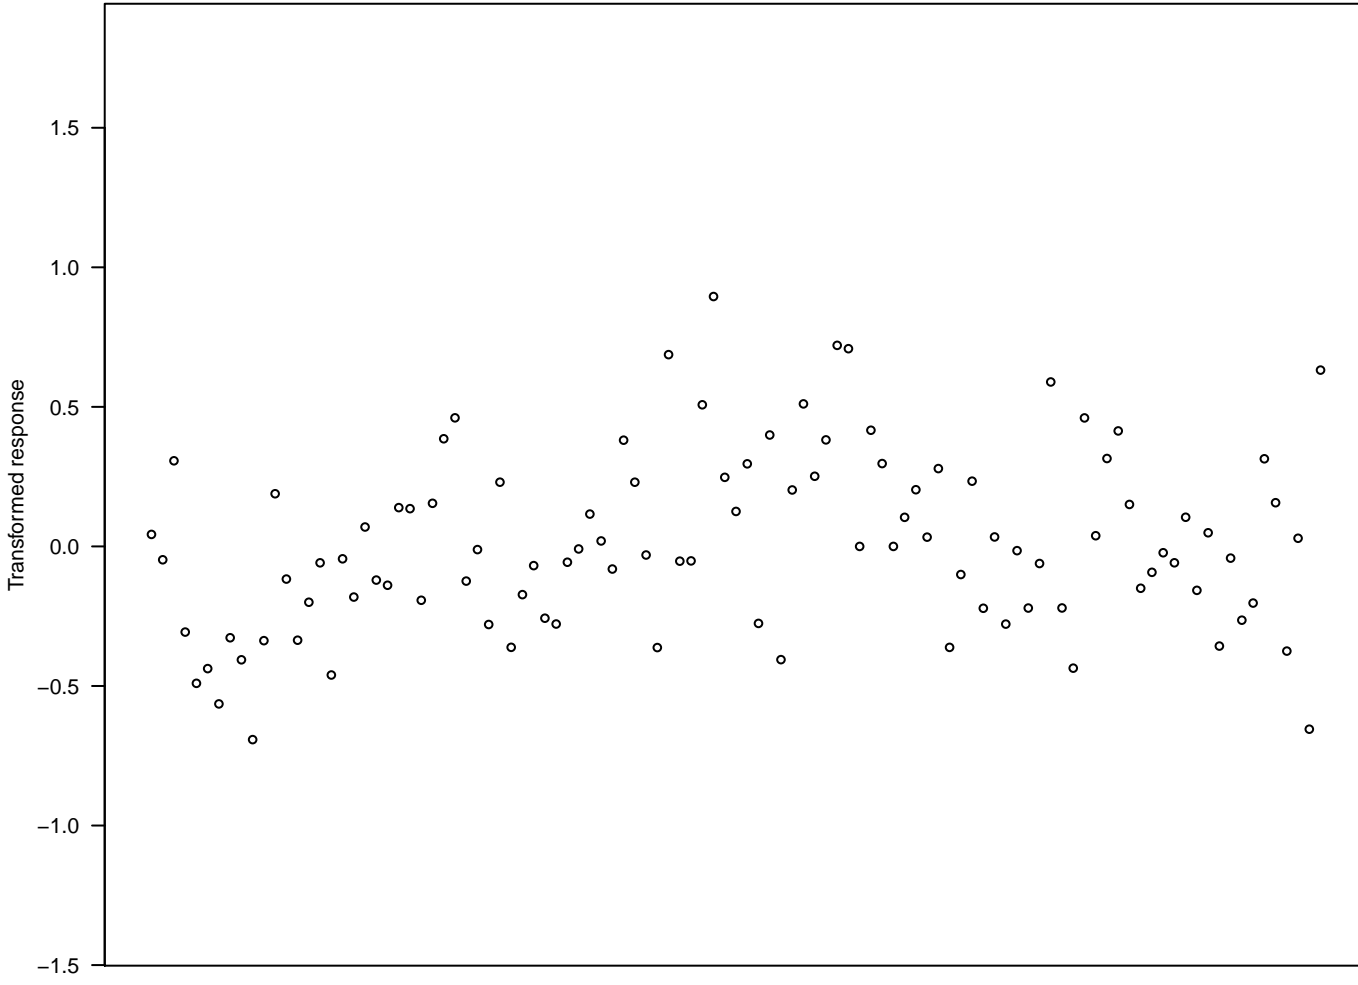

MRC Harwell

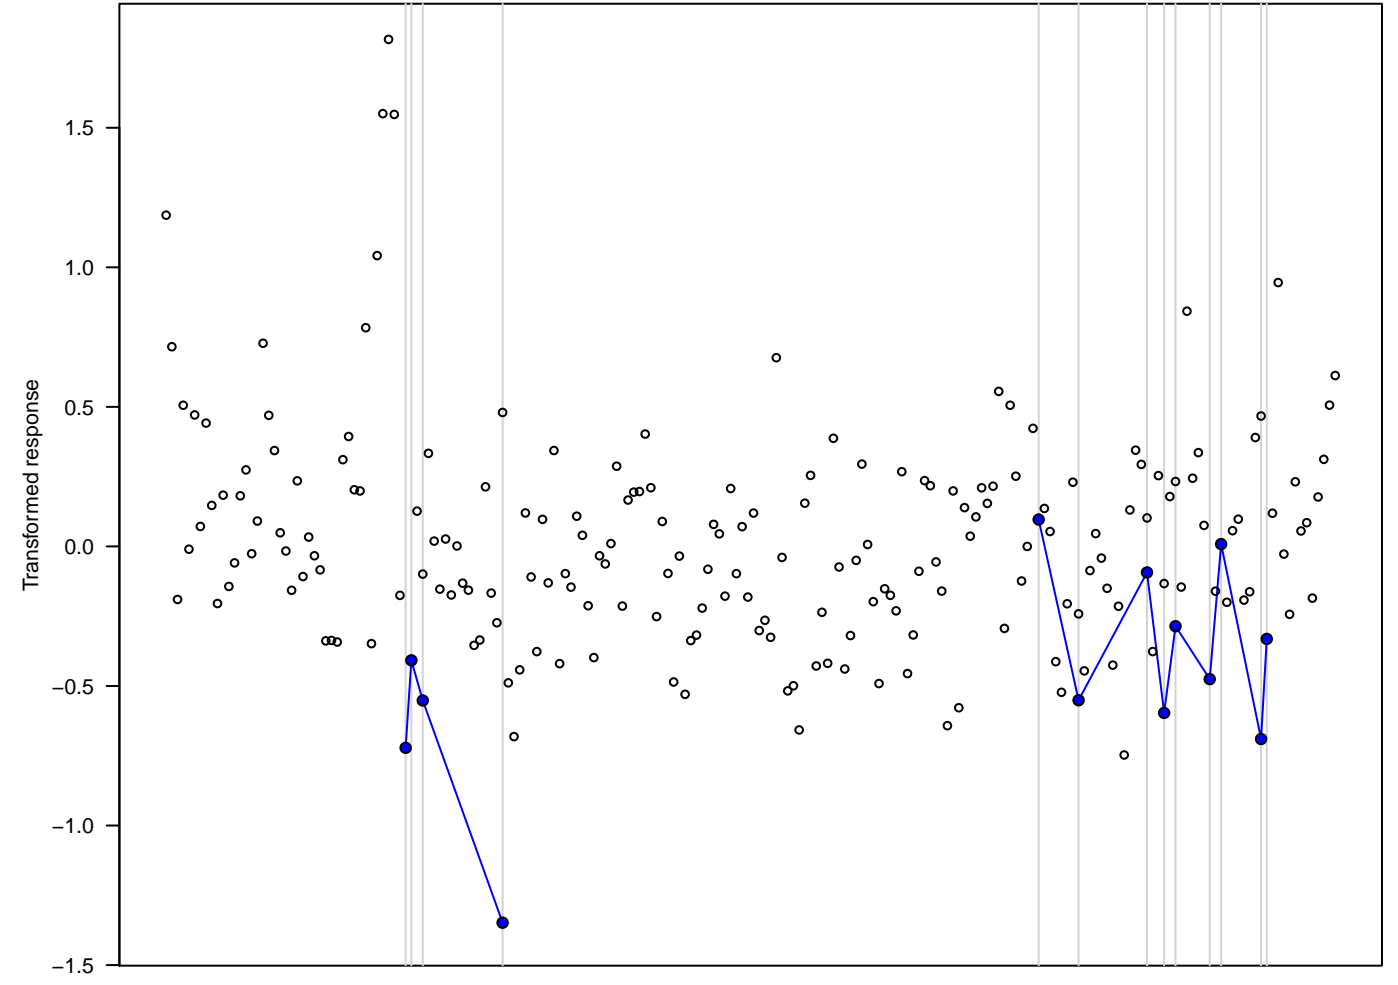

WTSI

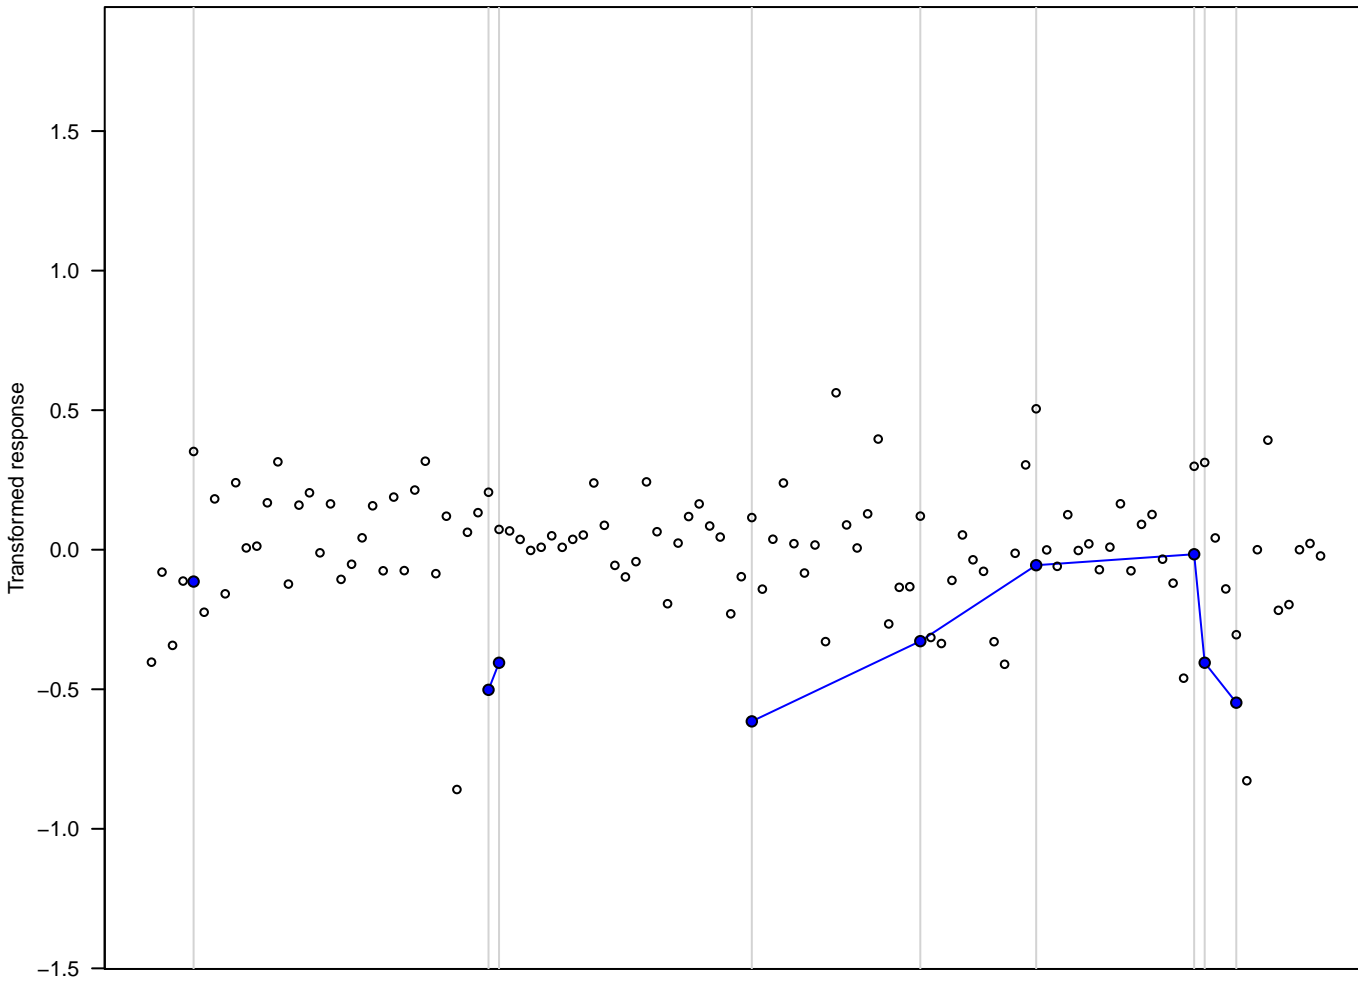

ICS

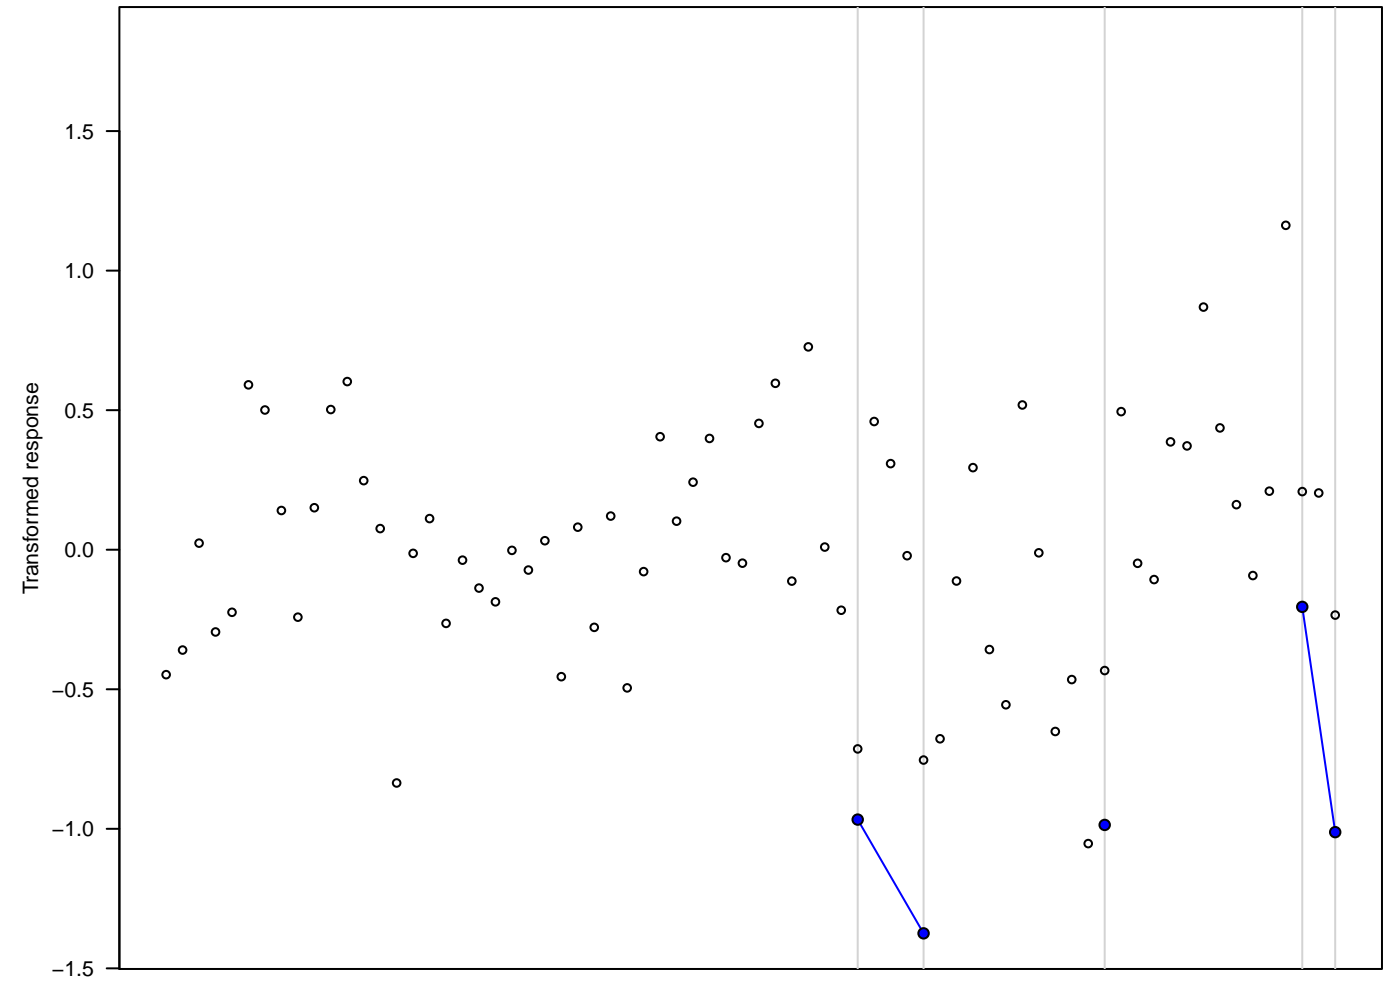

Forelimb and hindlimb grip strength normalised against body weight  
(Grip strength)

HMGU

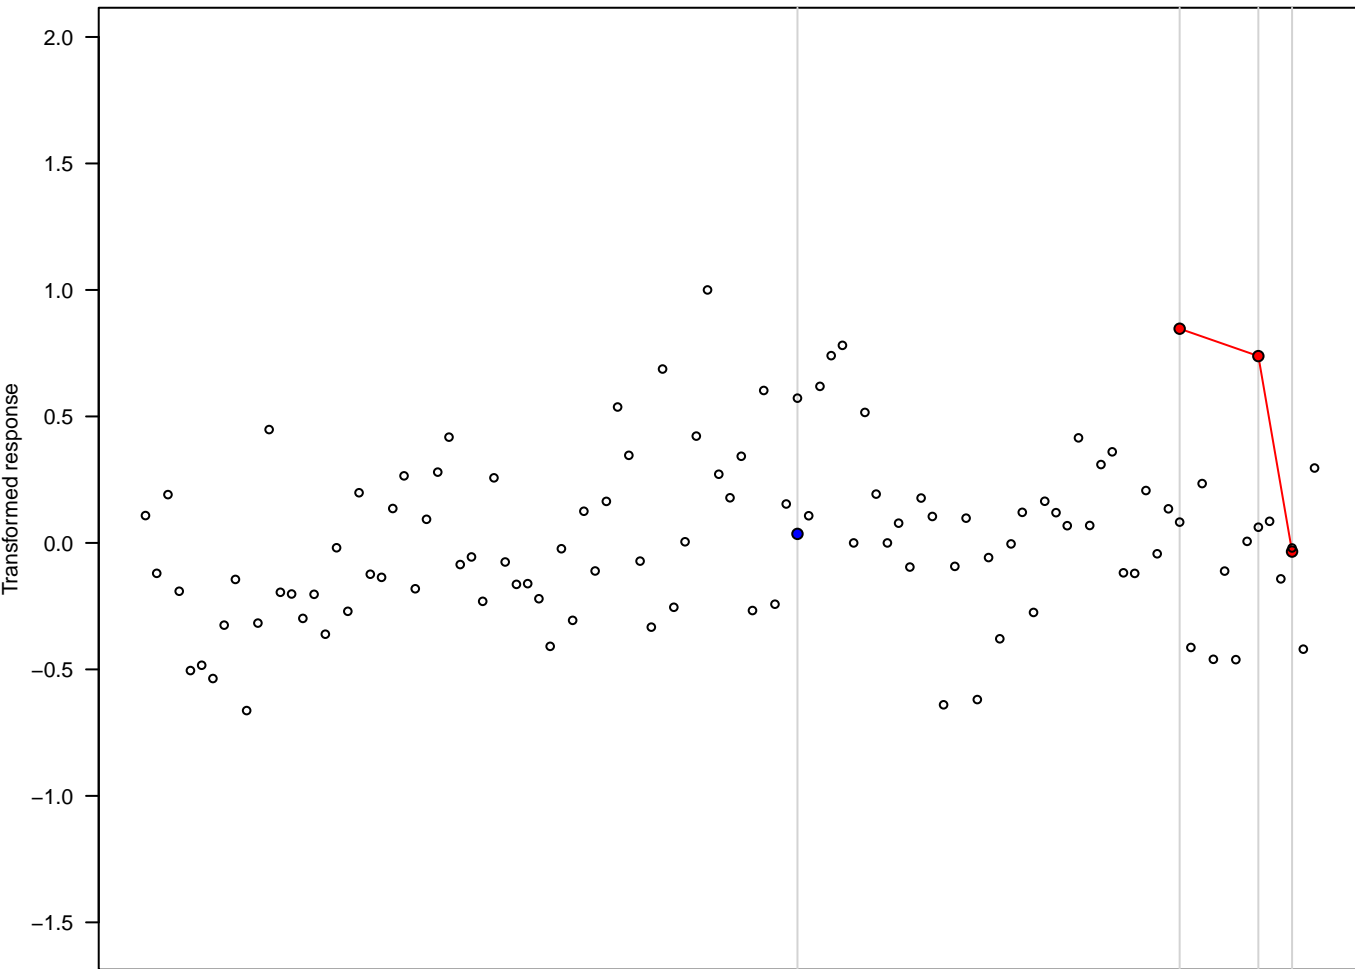

MRC Harwell

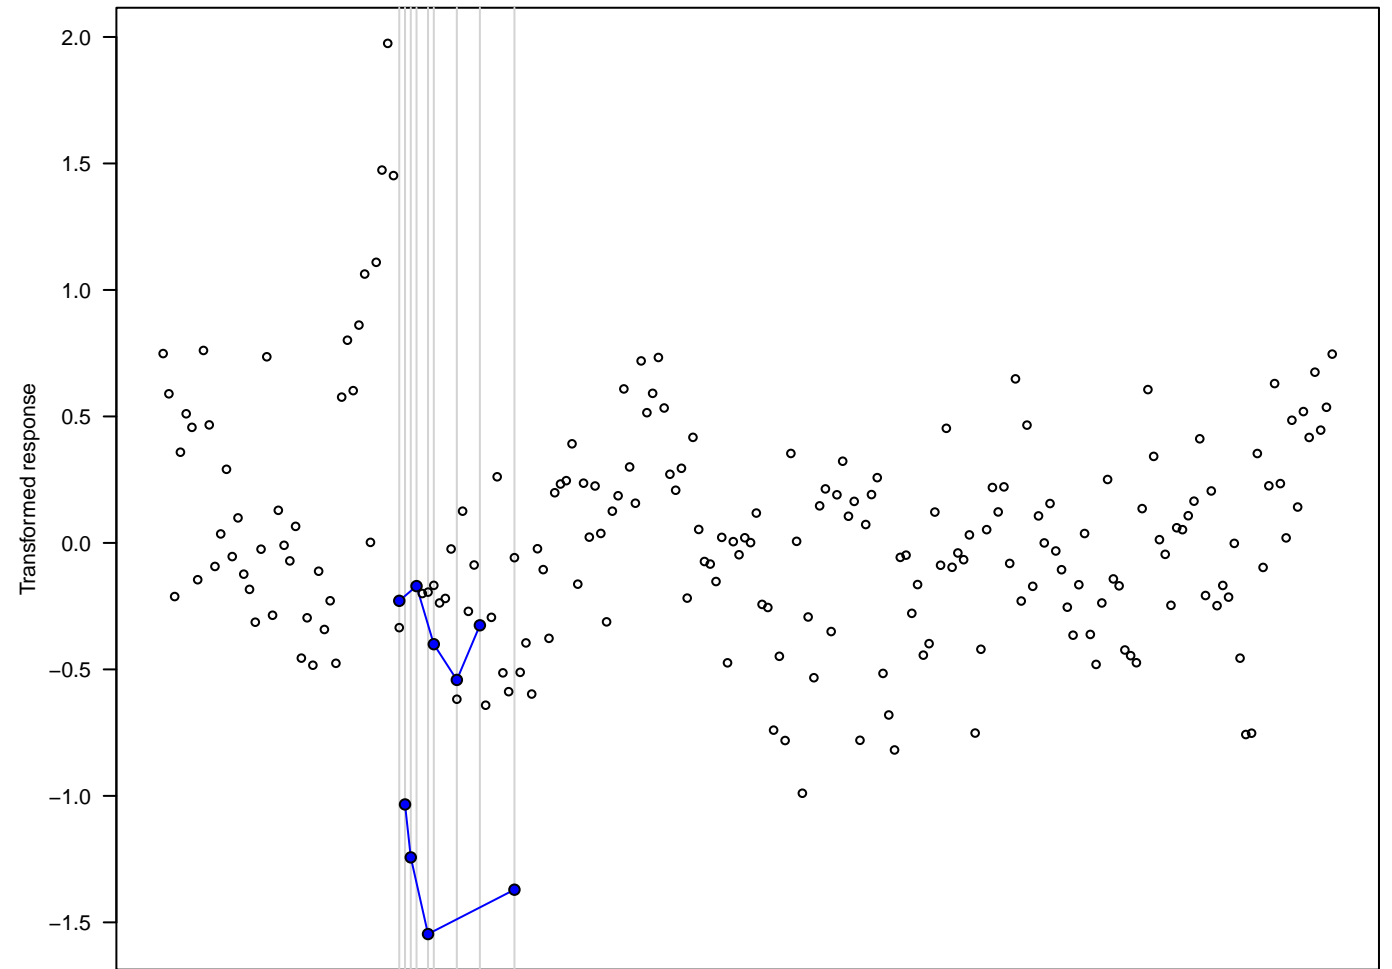

WTSI

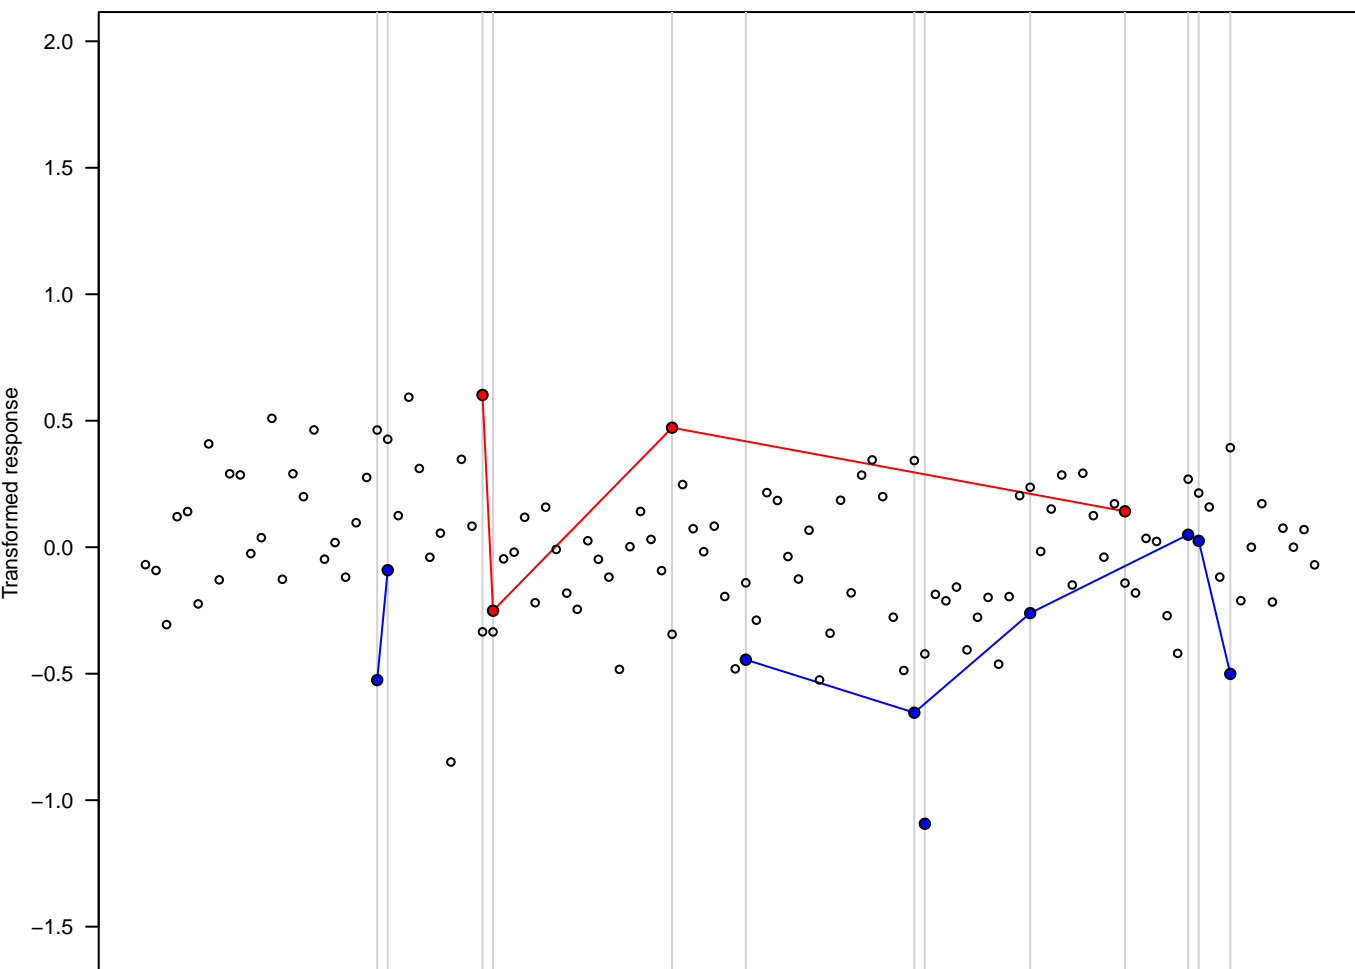

ICS

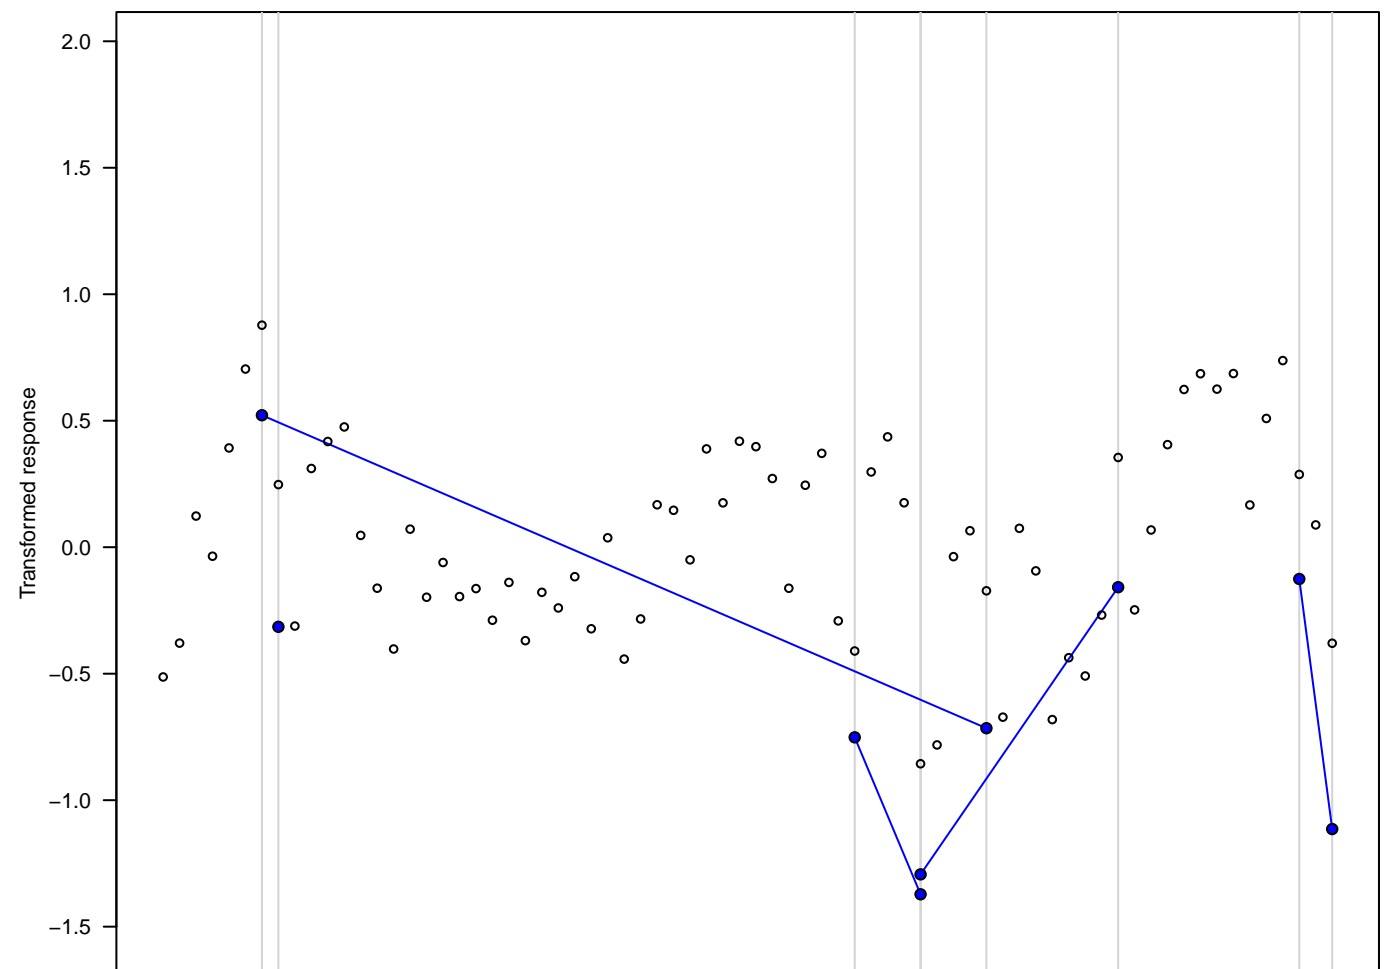

Mean latency to fall  
(Rotarod)

HMGU

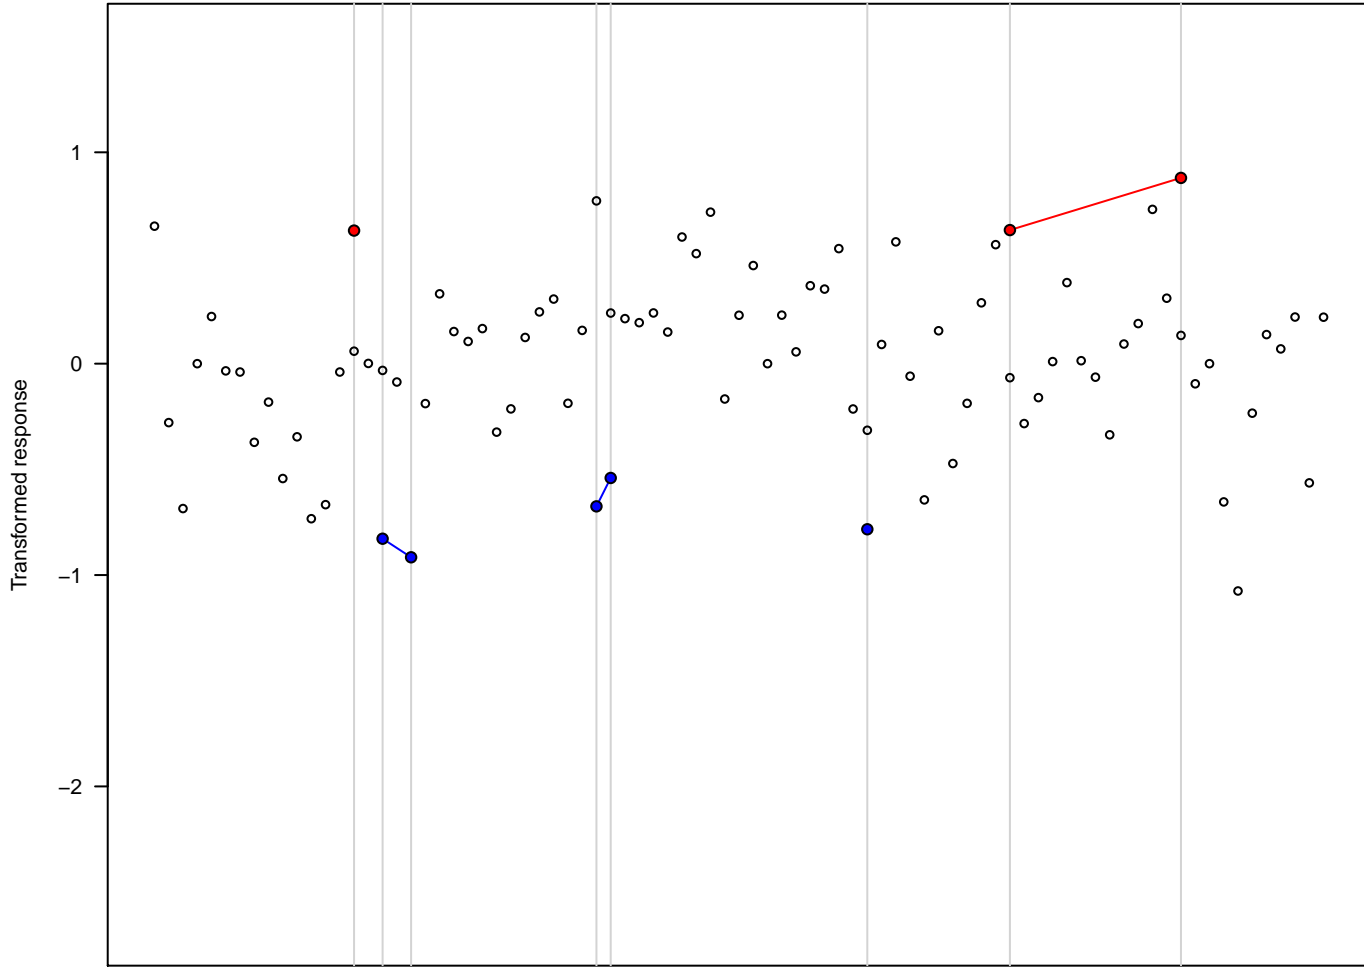

MRC Harwell

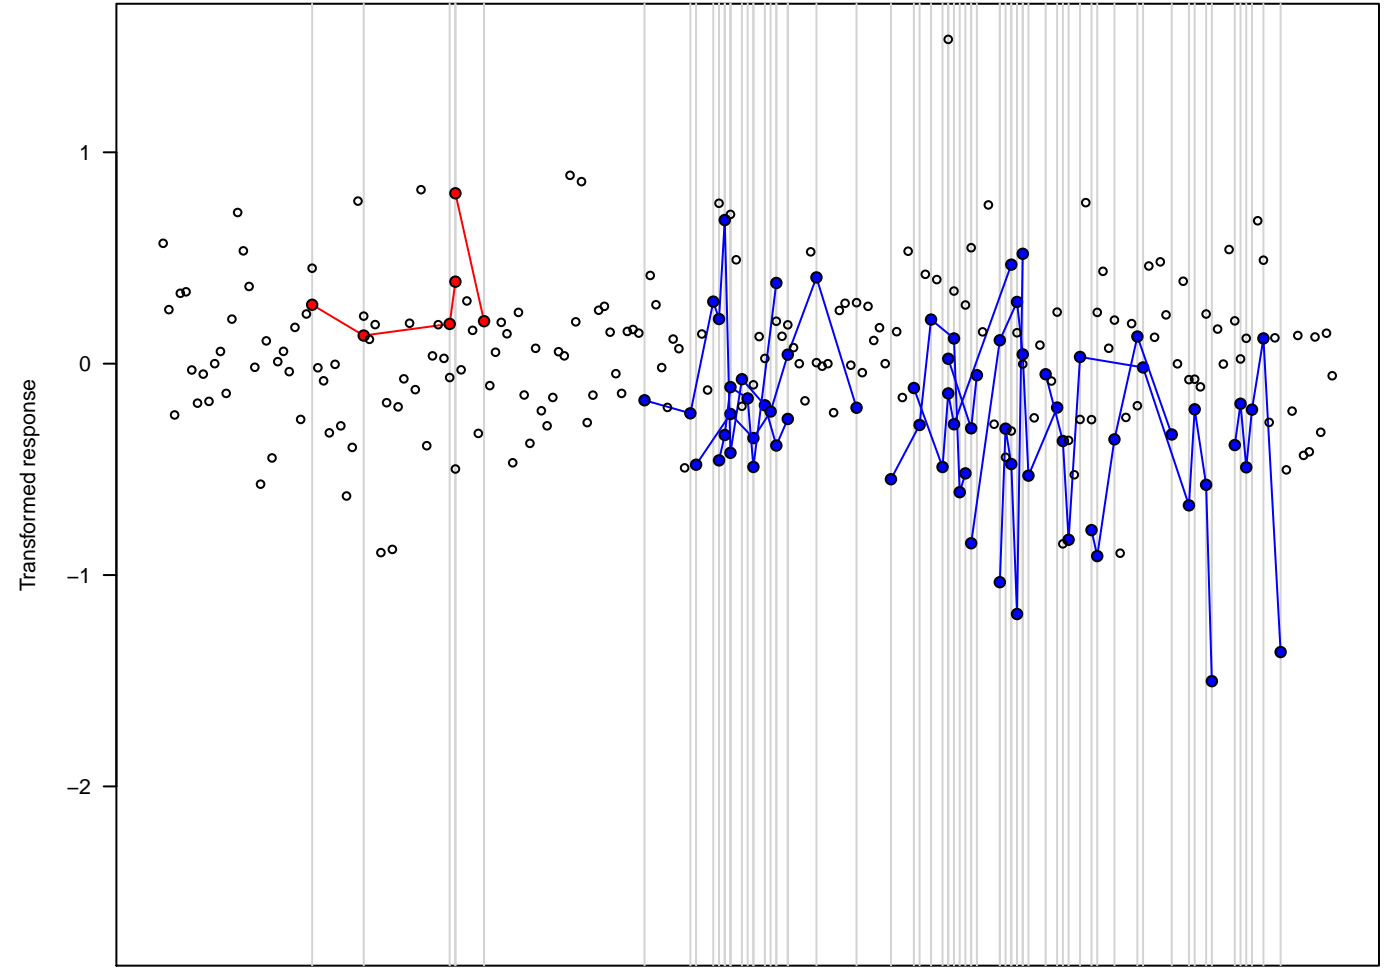

WTSI

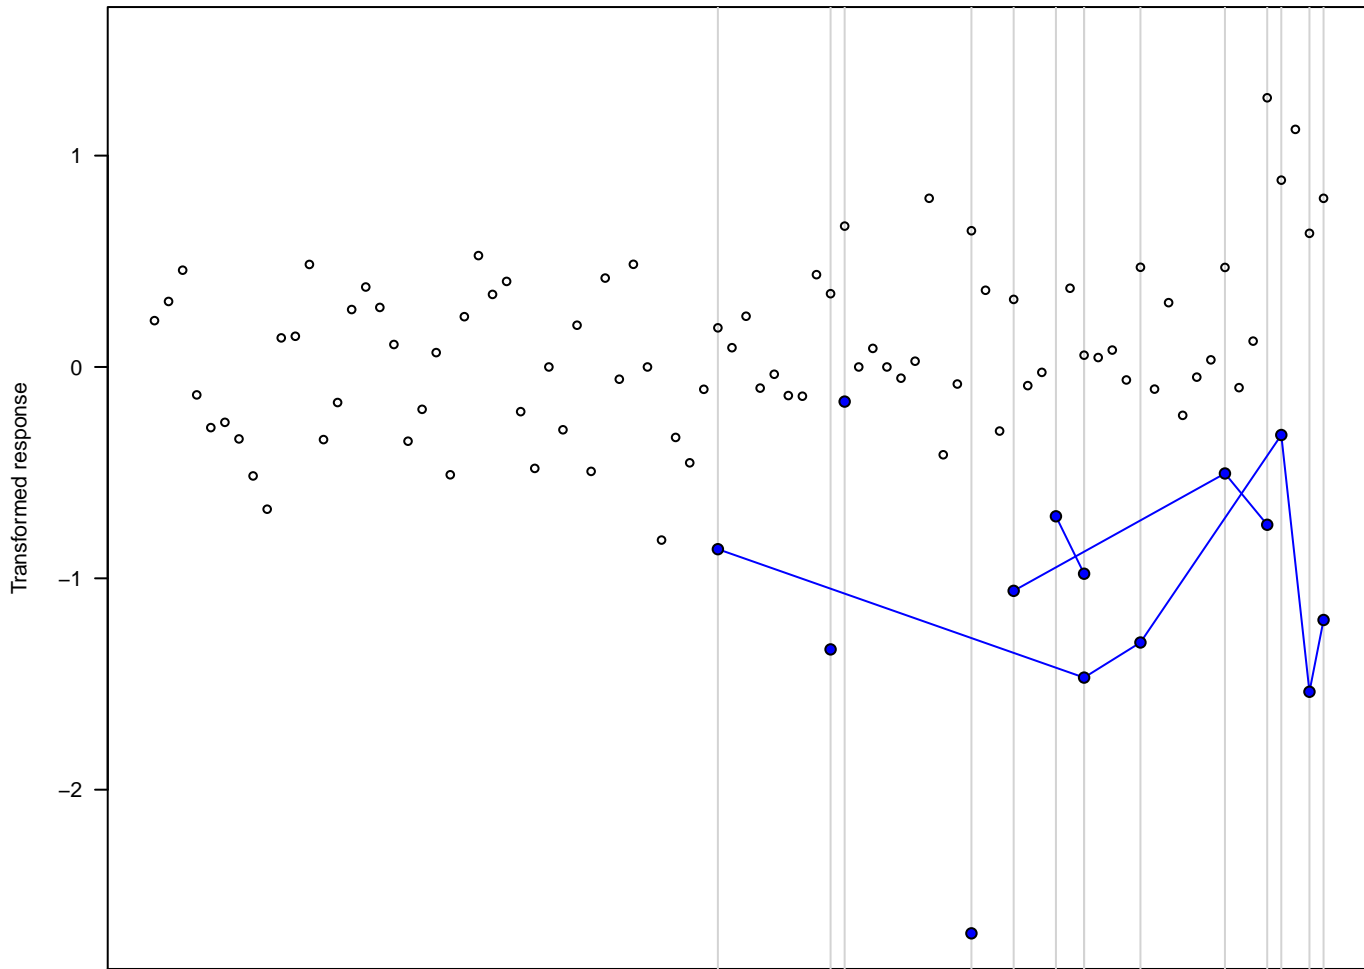

ICS

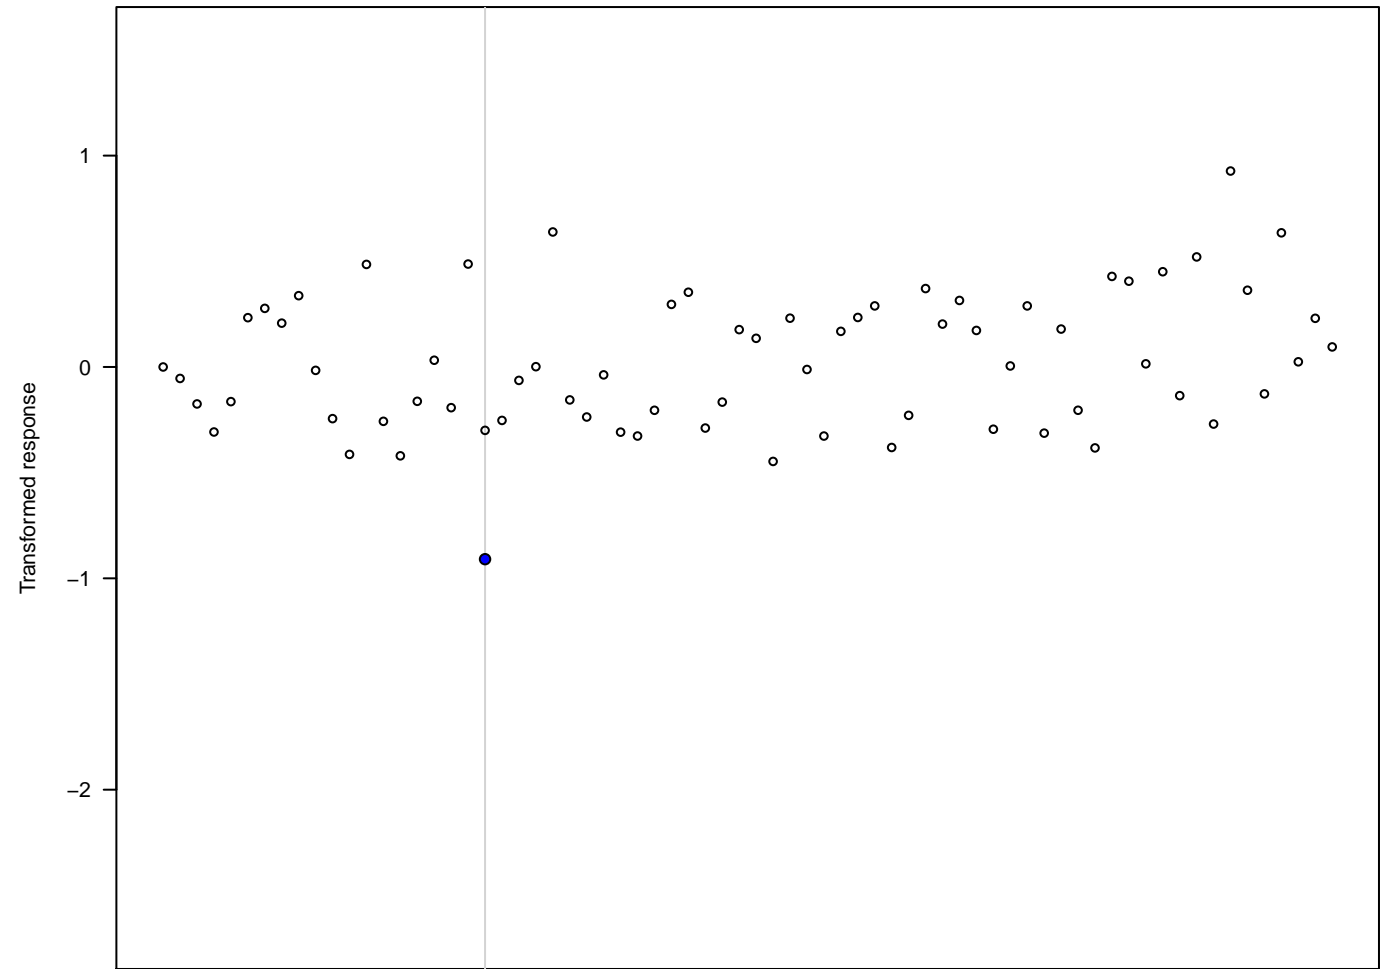

BN startle magnitude  
(Acoustic Startle&PPI)

HMGU

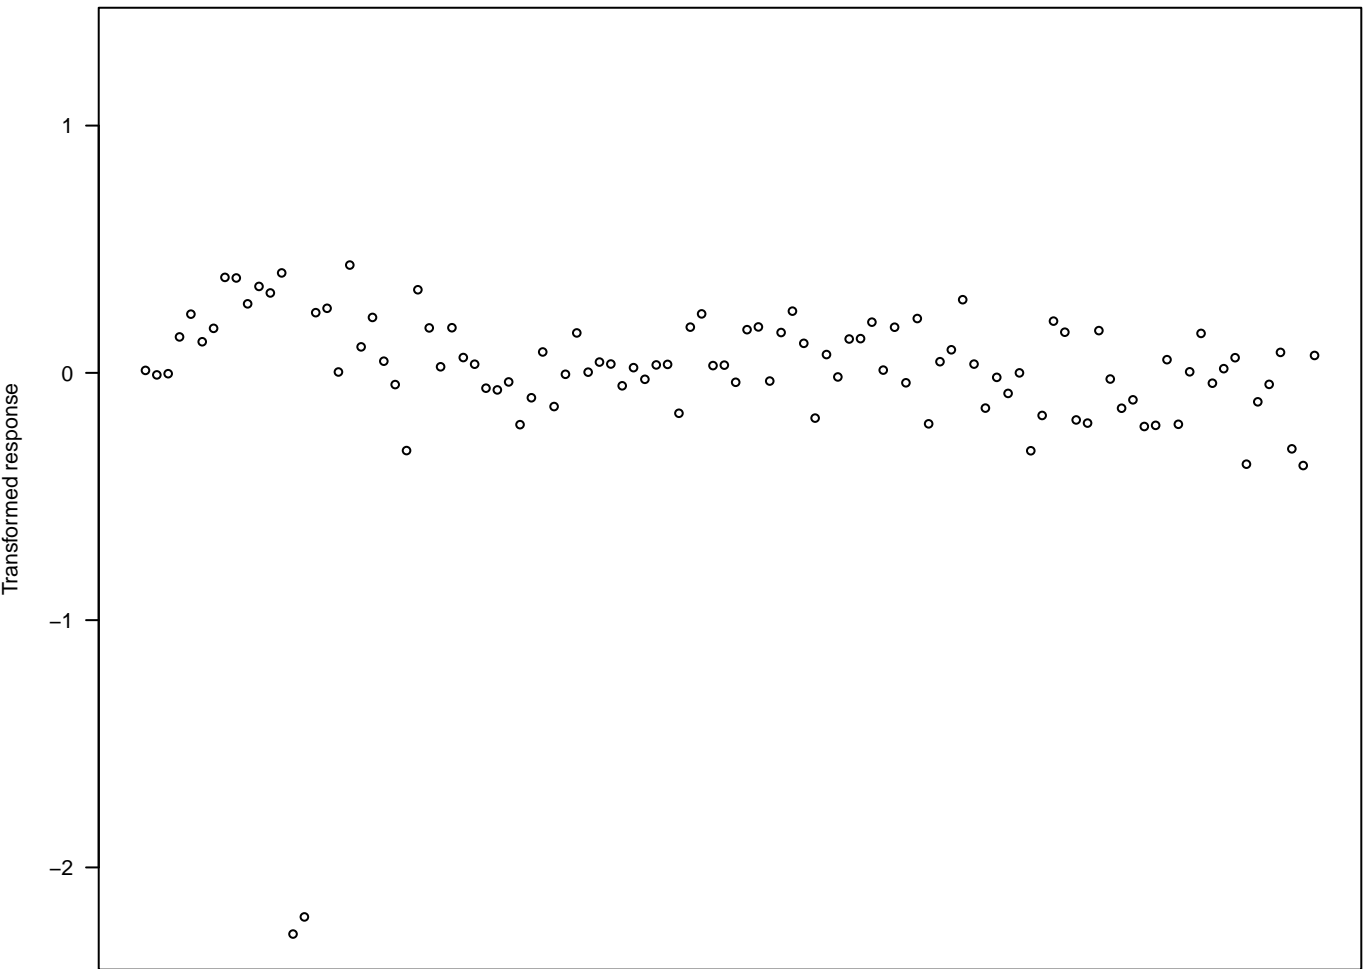

MRC Harwell

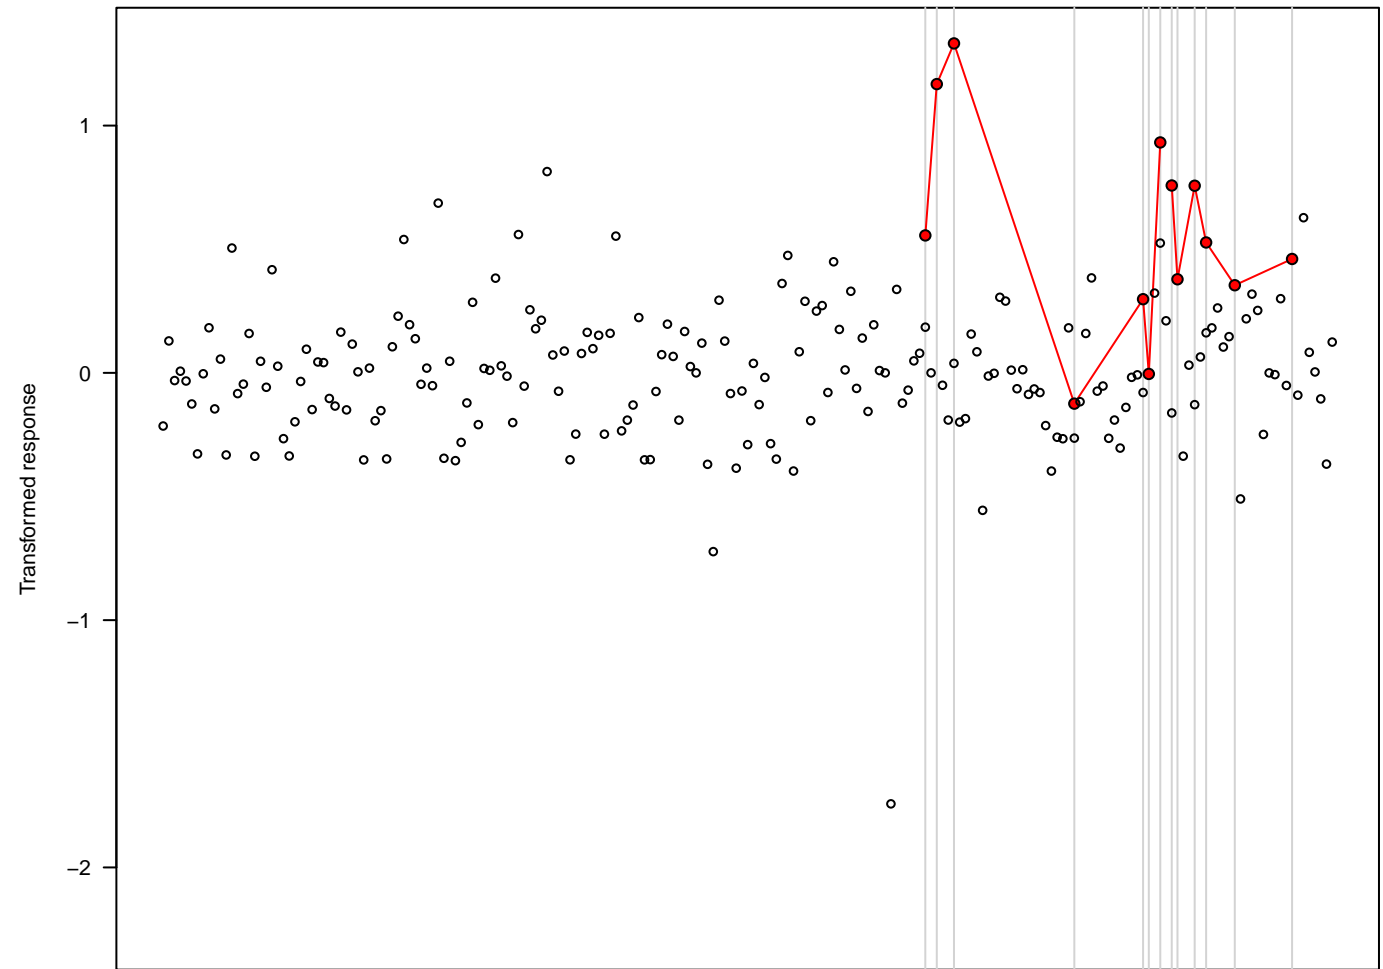

WTSI

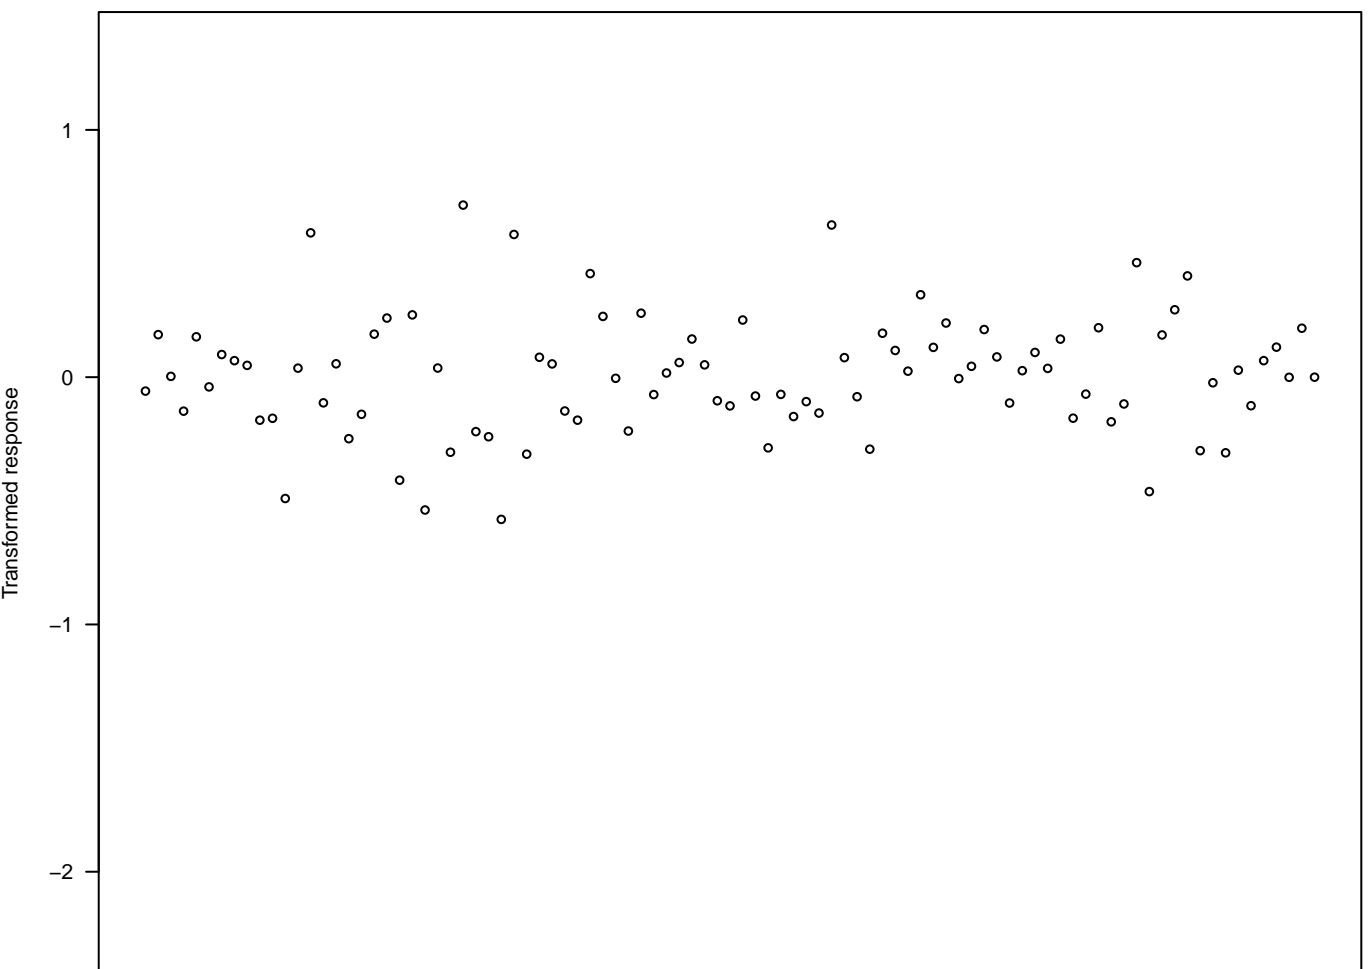

ICS

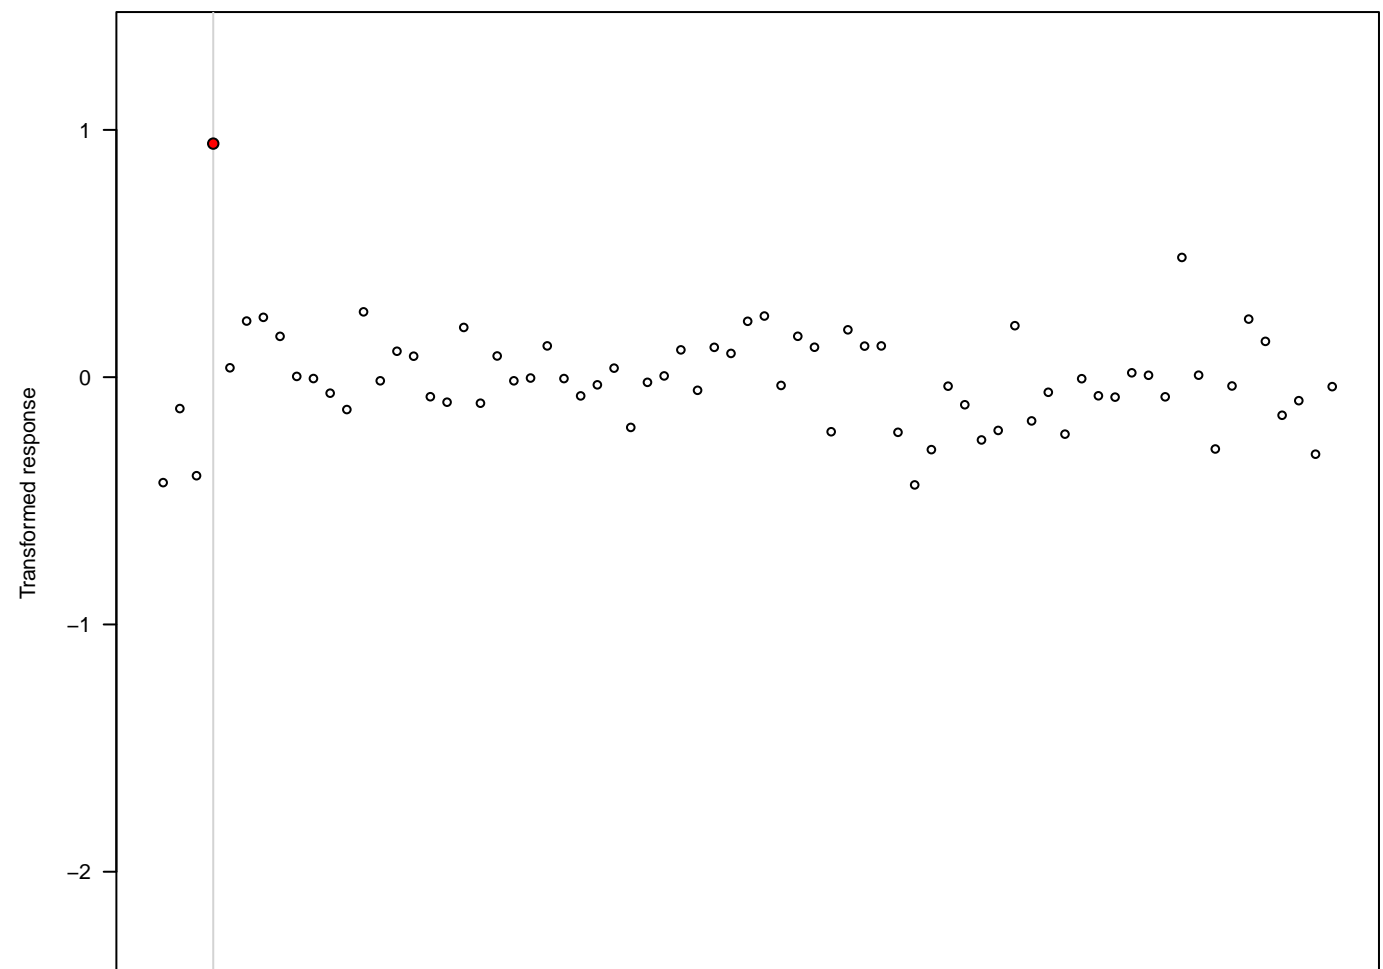

PP1 startle magnitude  
(Acoustic Startle&PPI)

HMGU

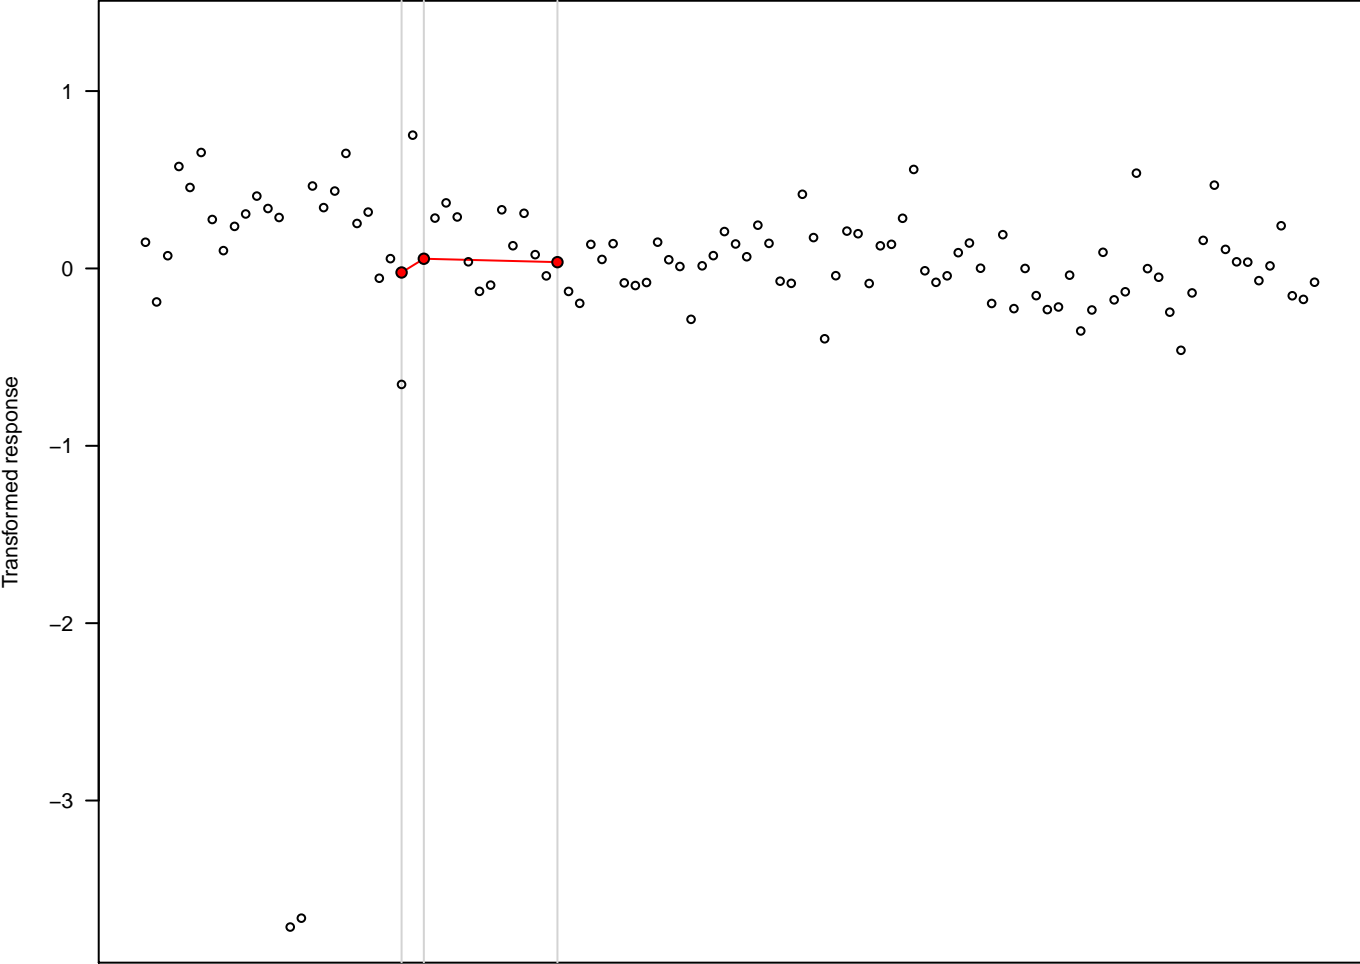

MRC Harwell

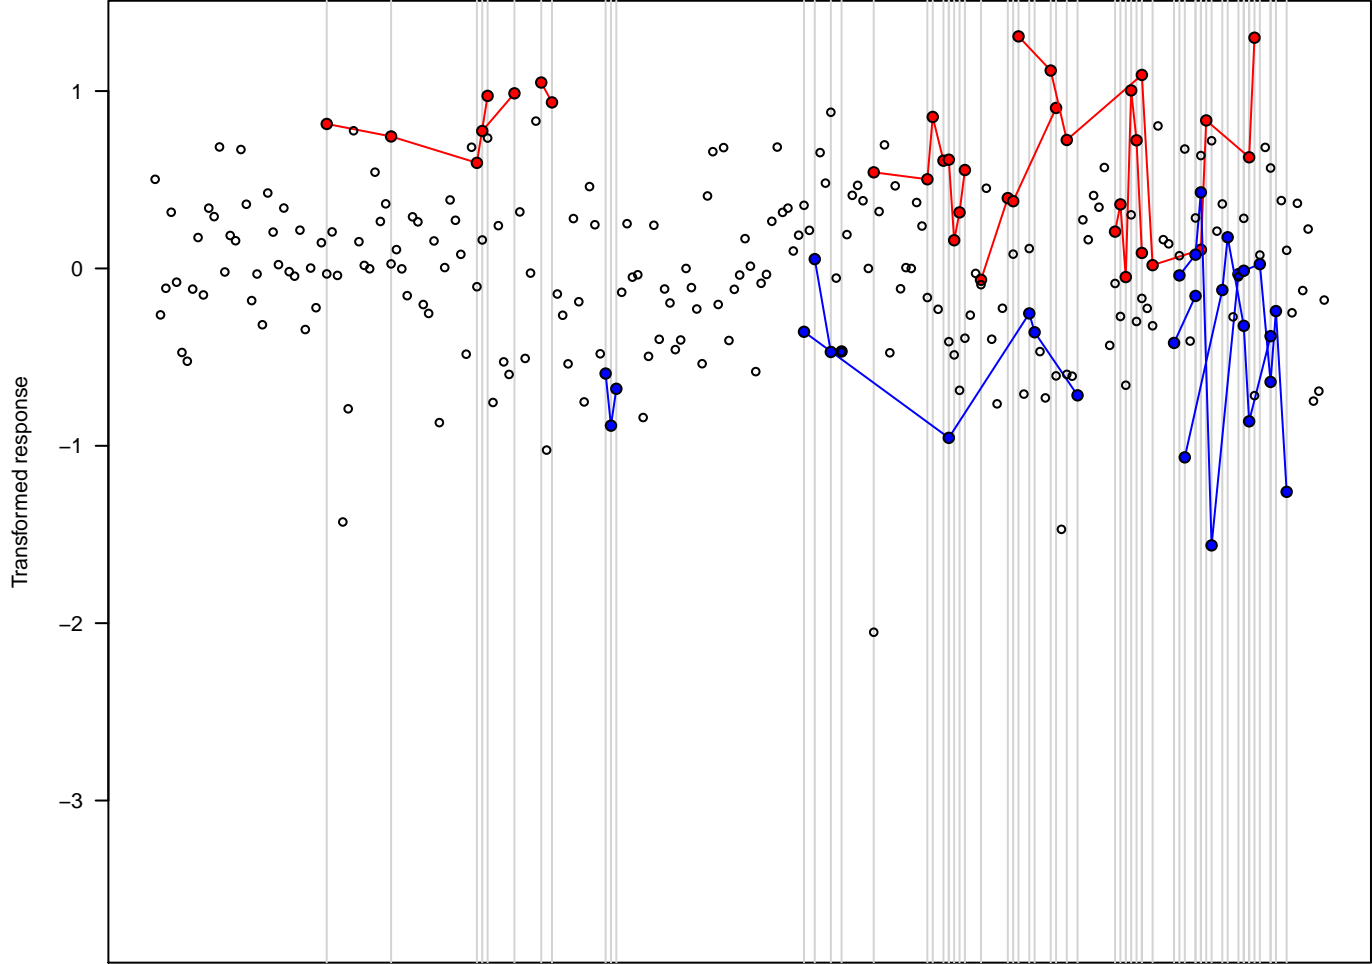

WTSI

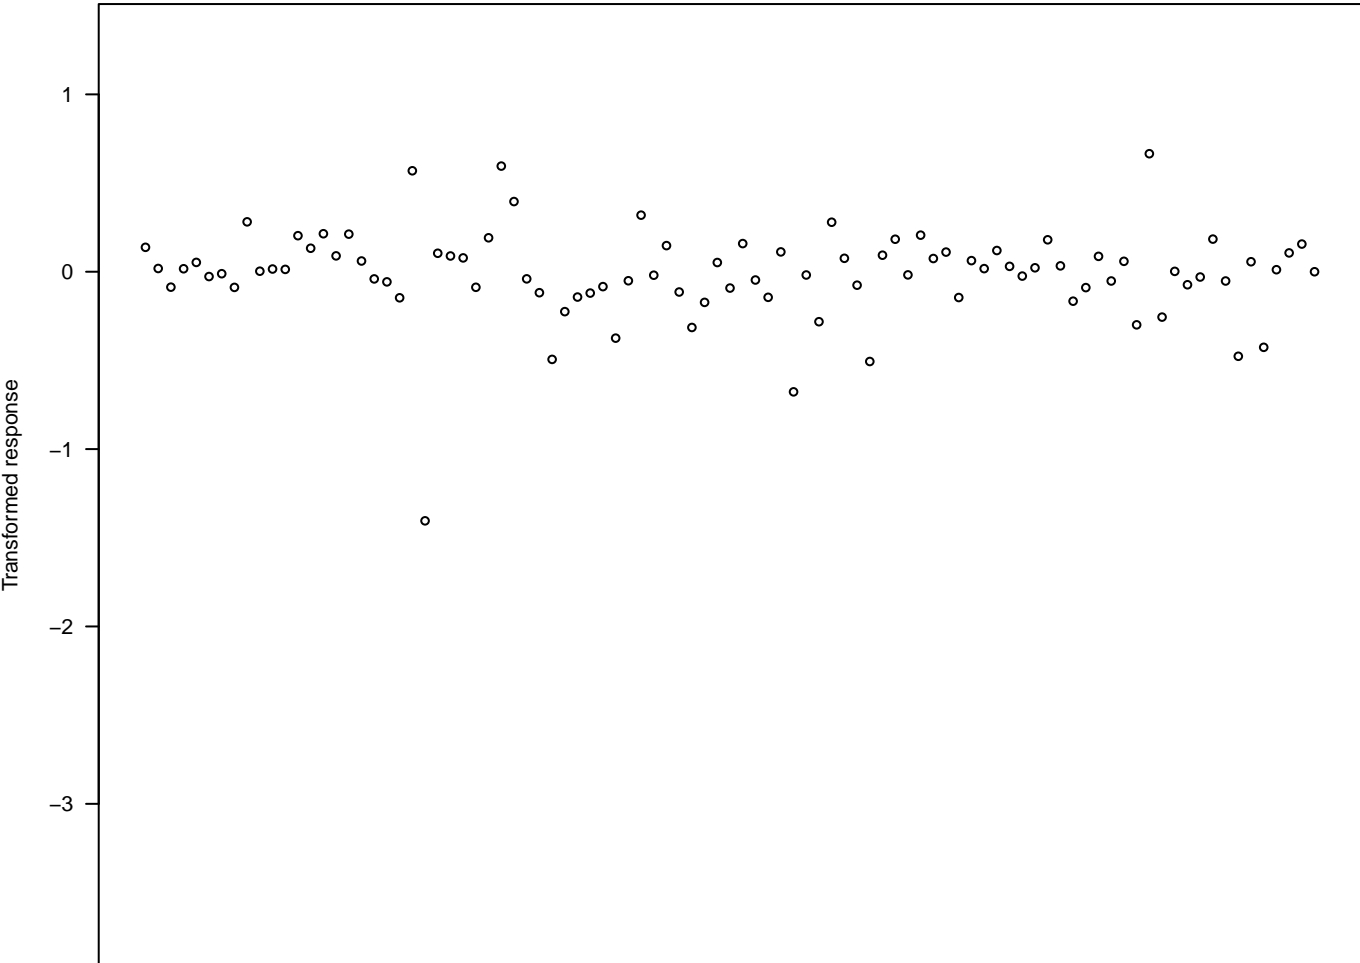

ICS

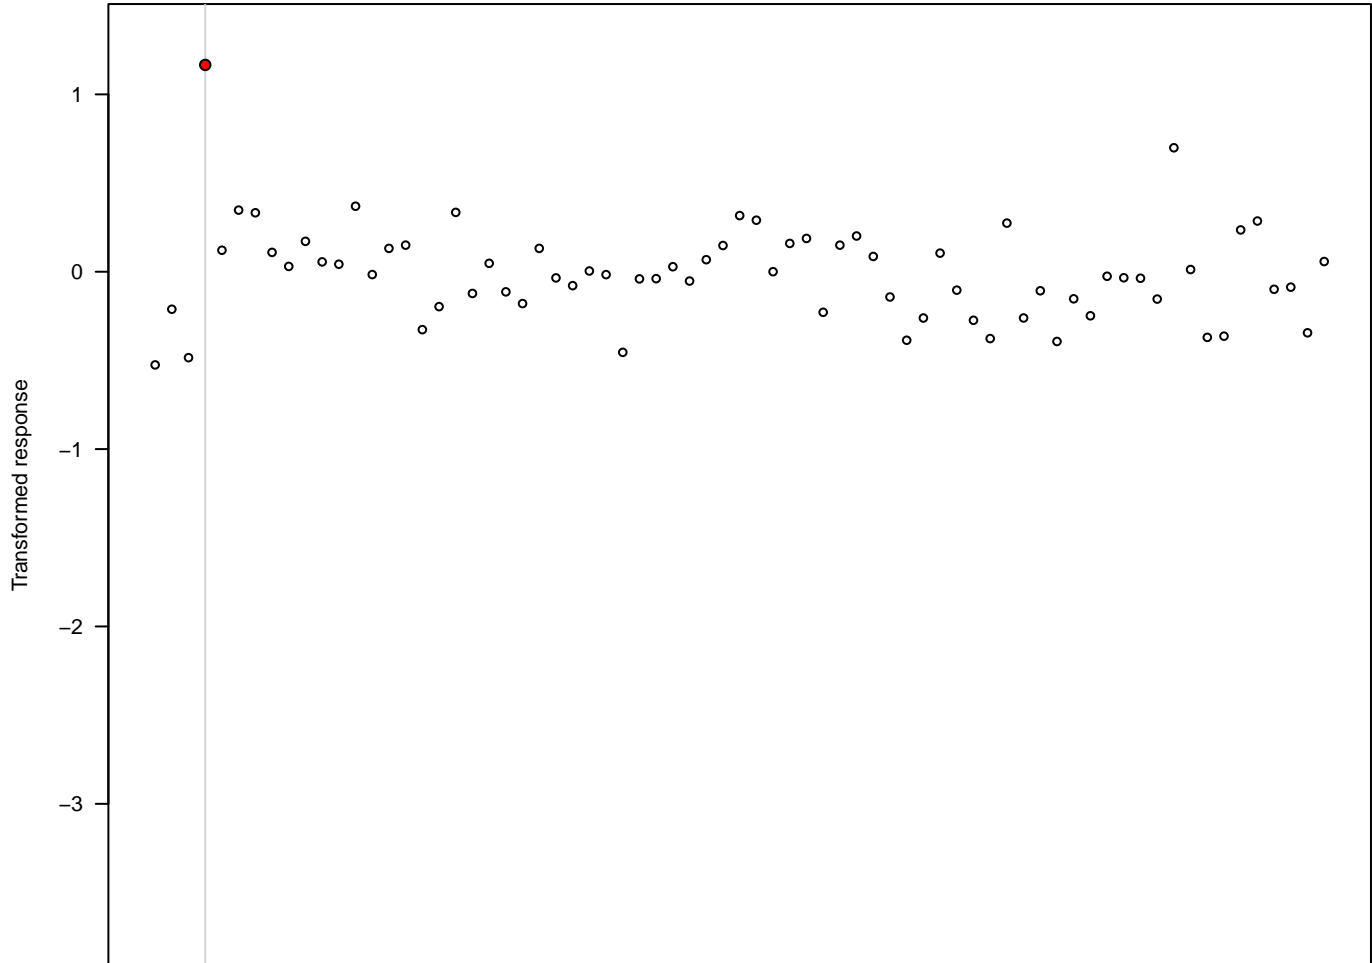

PP2 startle magnitude  
(Acoustic Startle&PPI)

HMGU

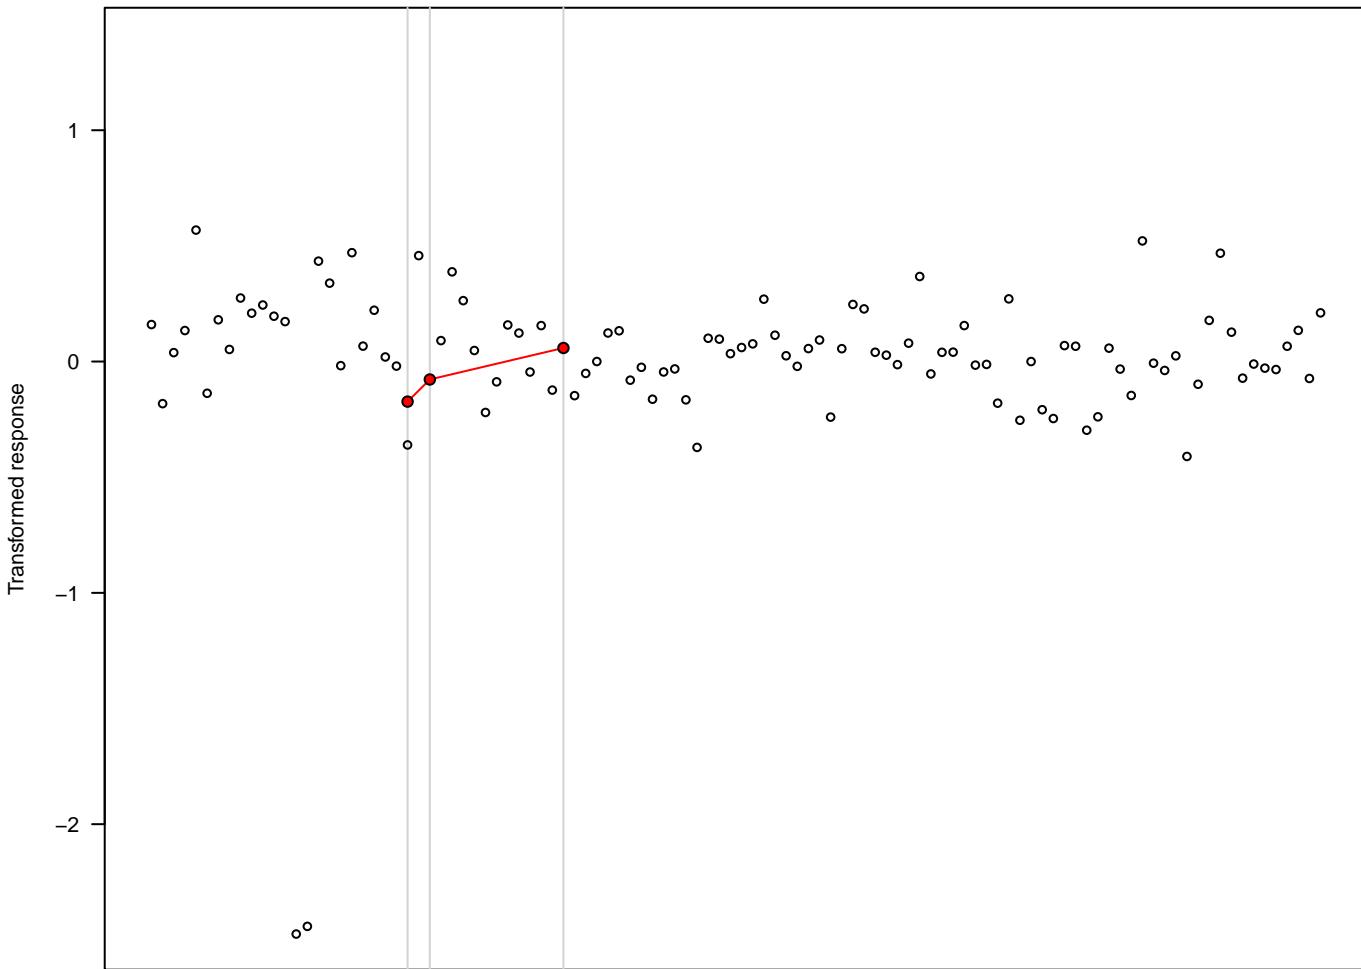

MRC Harwell

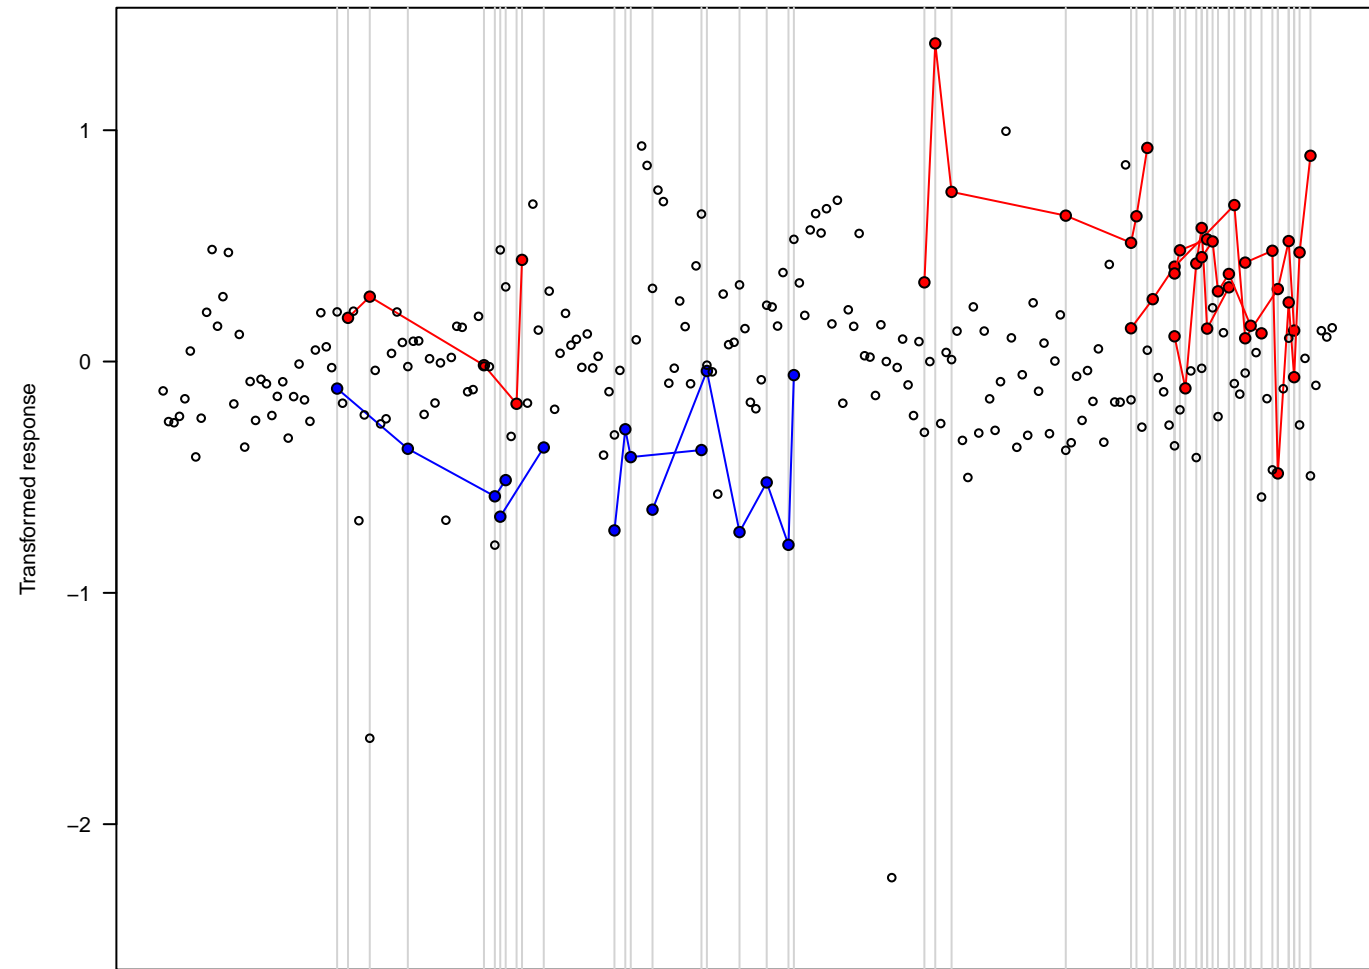

WTSI

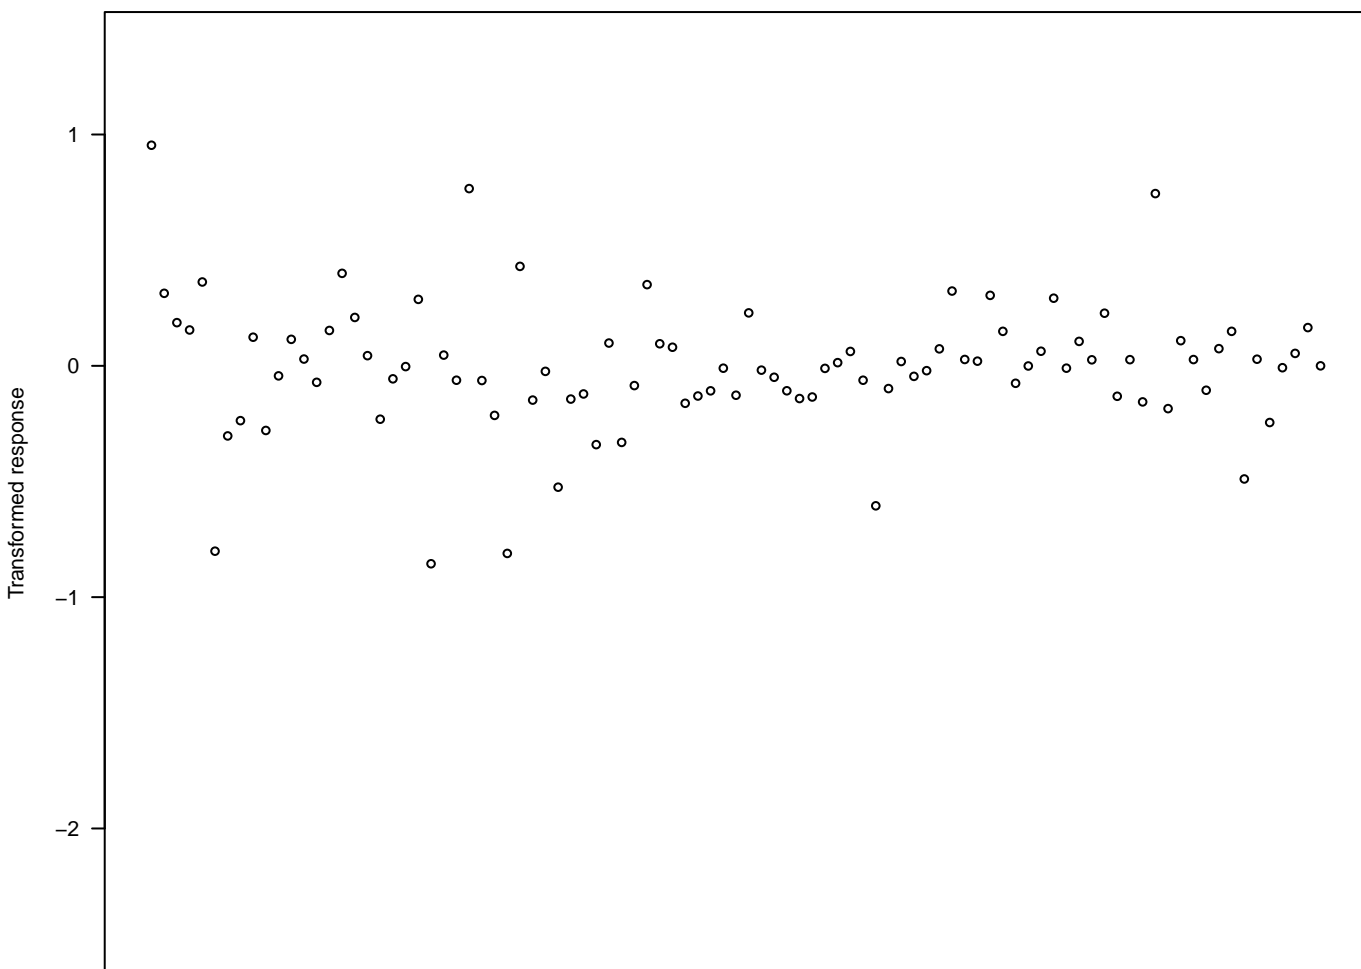

ICS

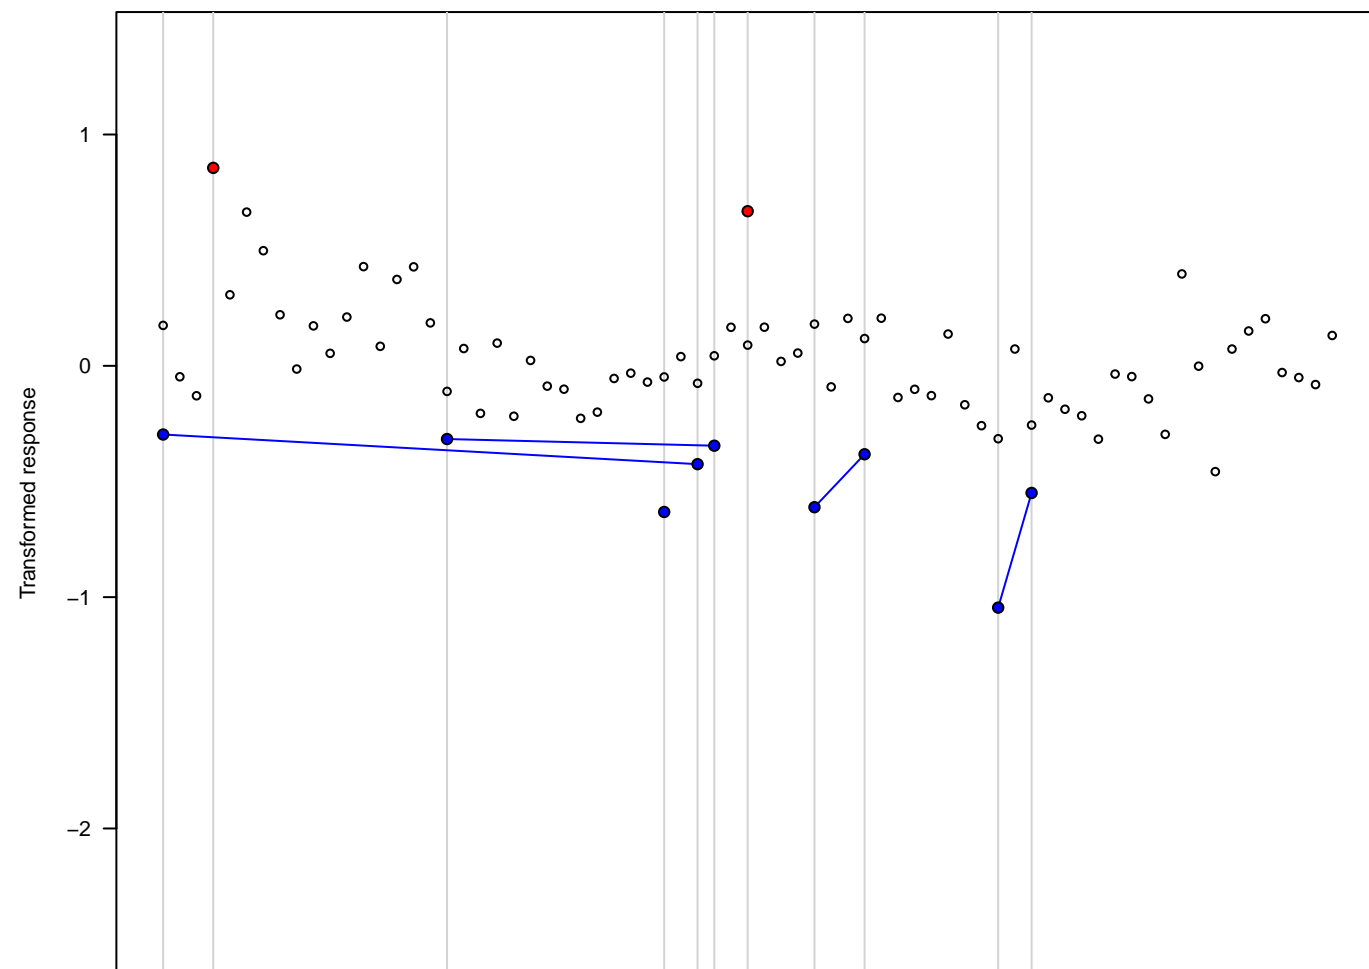



PP3 startle magnitude  
(Acoustic Startle&PPI)

HMGU

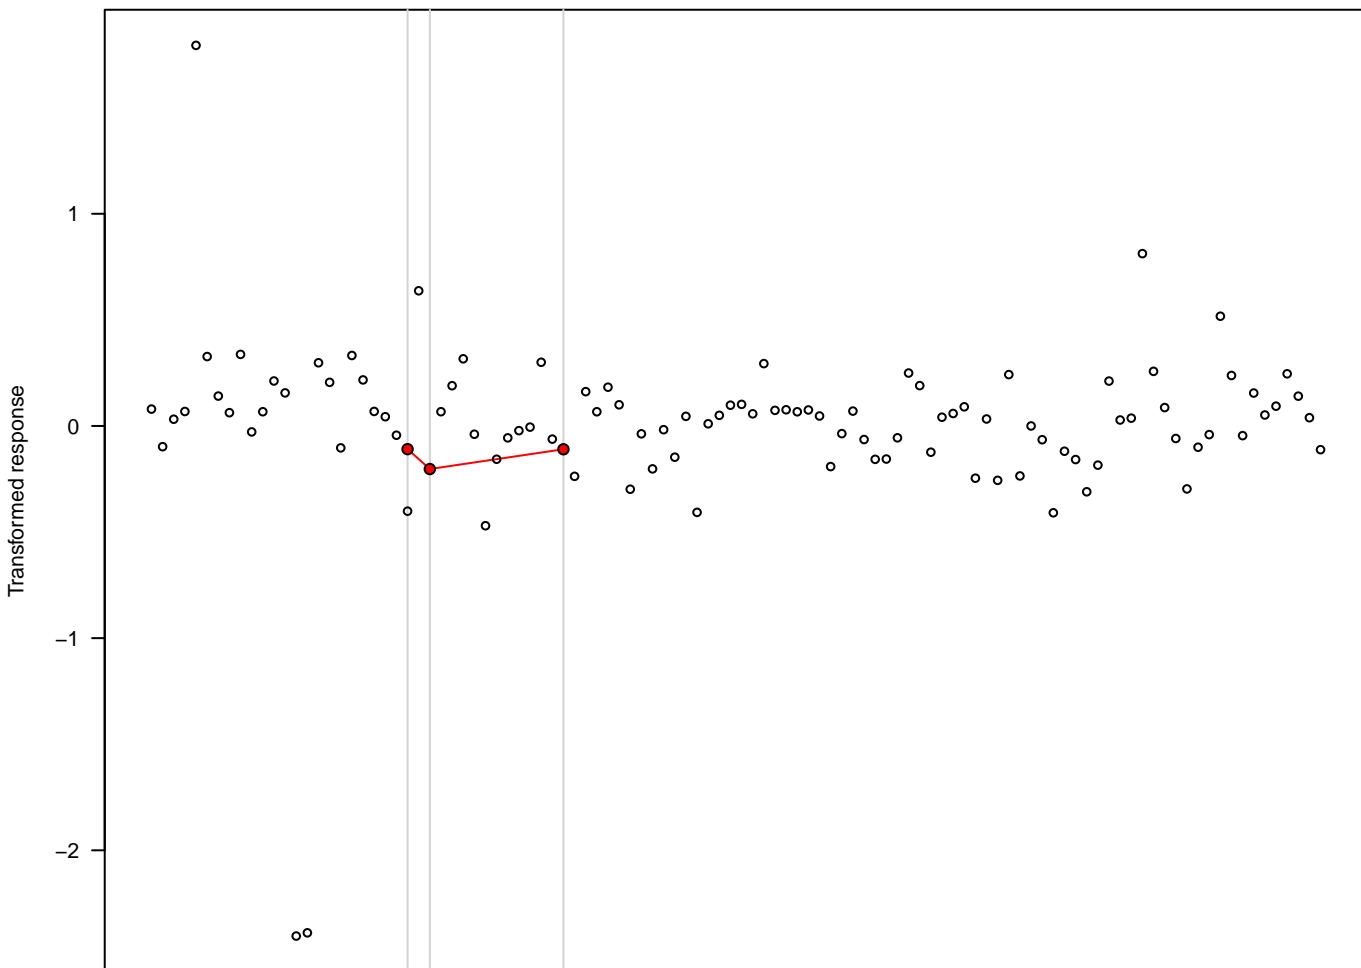

MRC Harwell

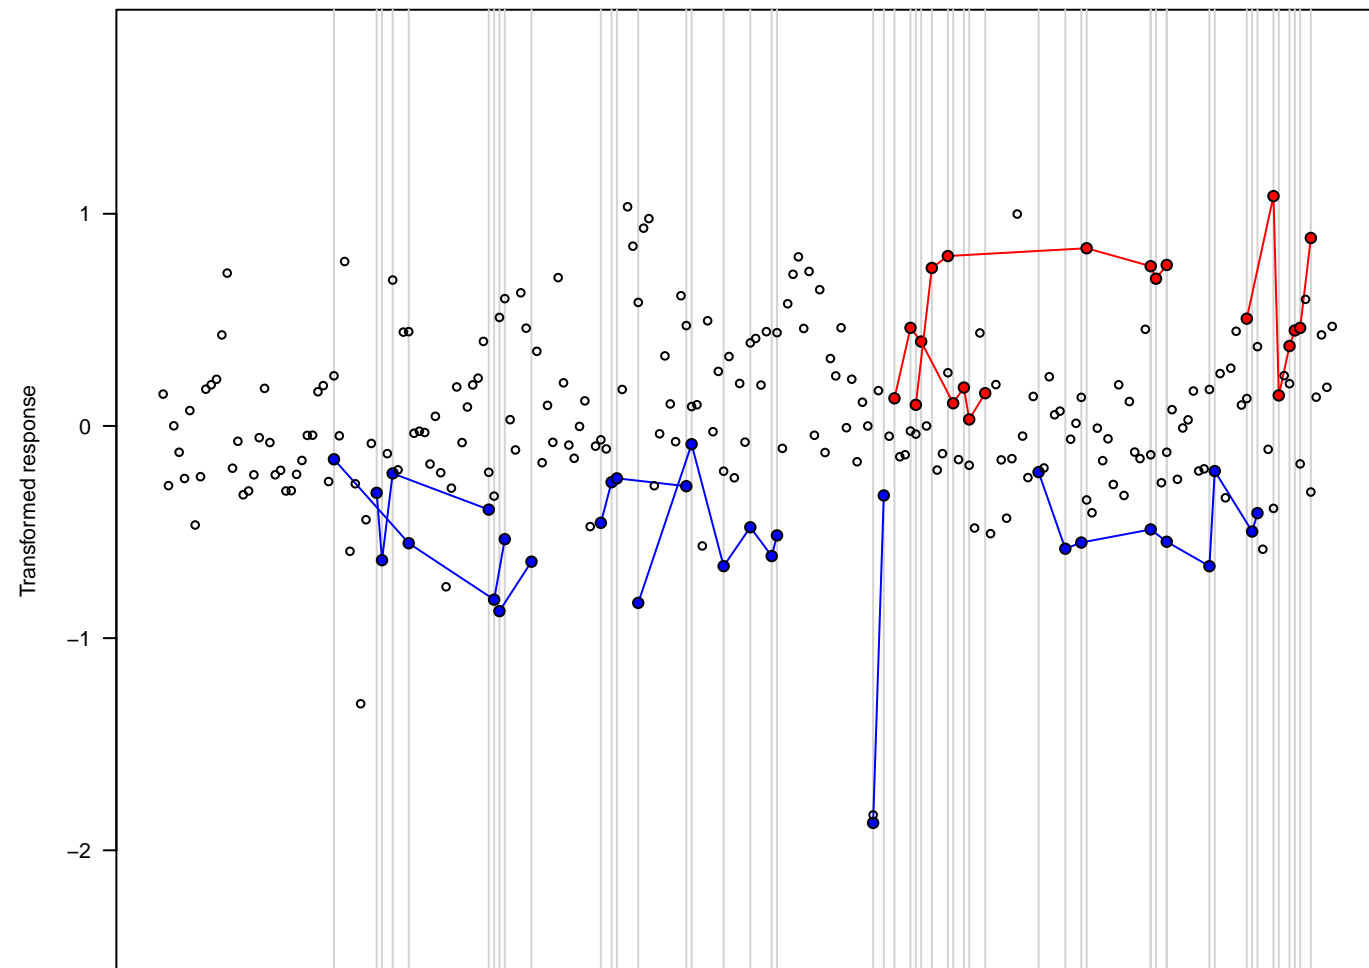

WTSI

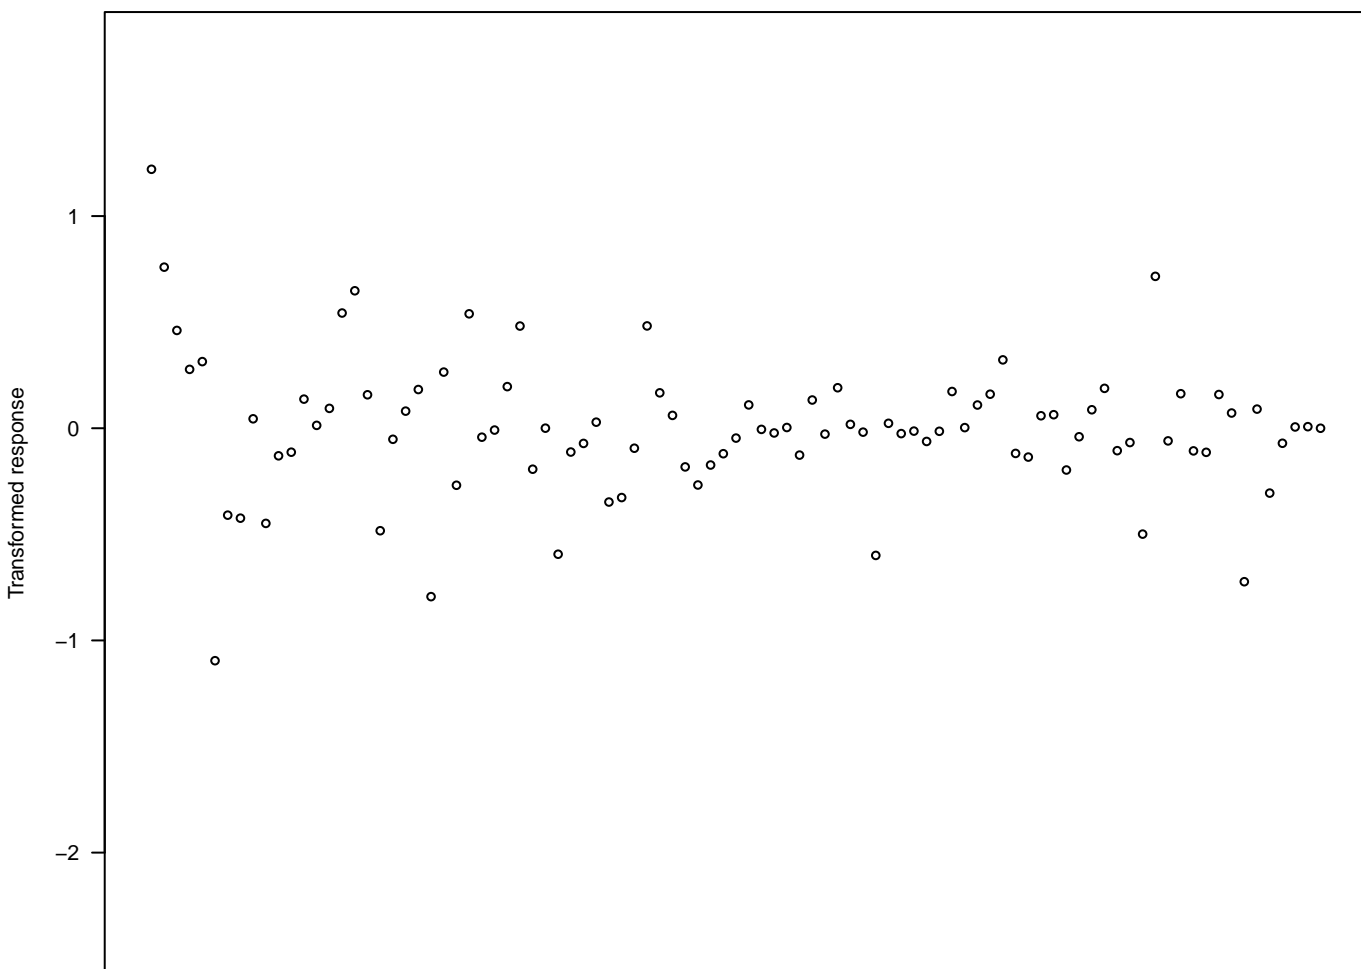

ICS

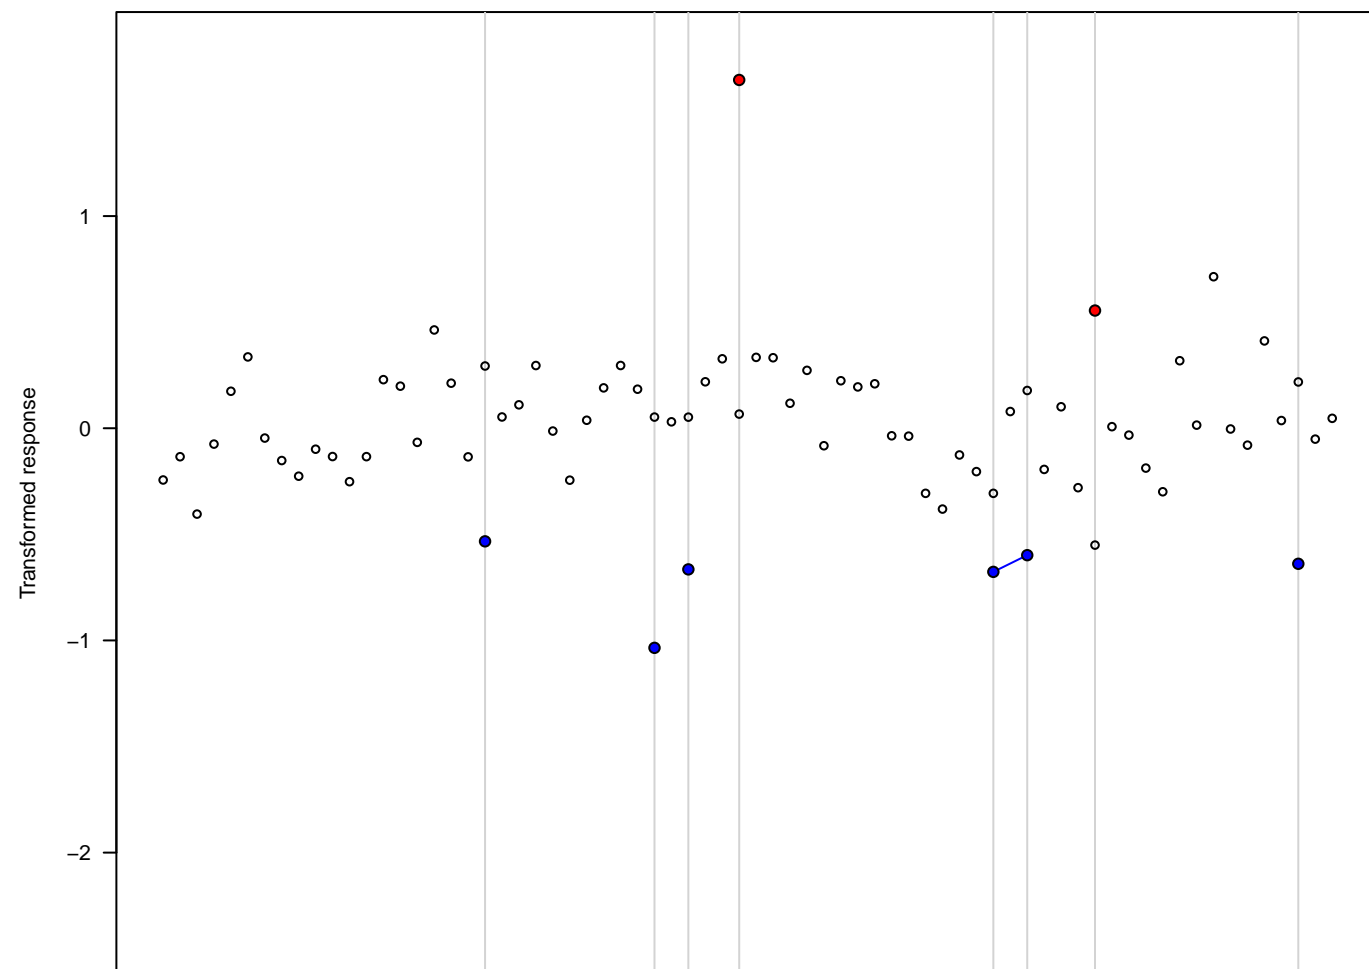

PP4 startle magnitude  
(Acoustic Startle&PPI)

HMGU

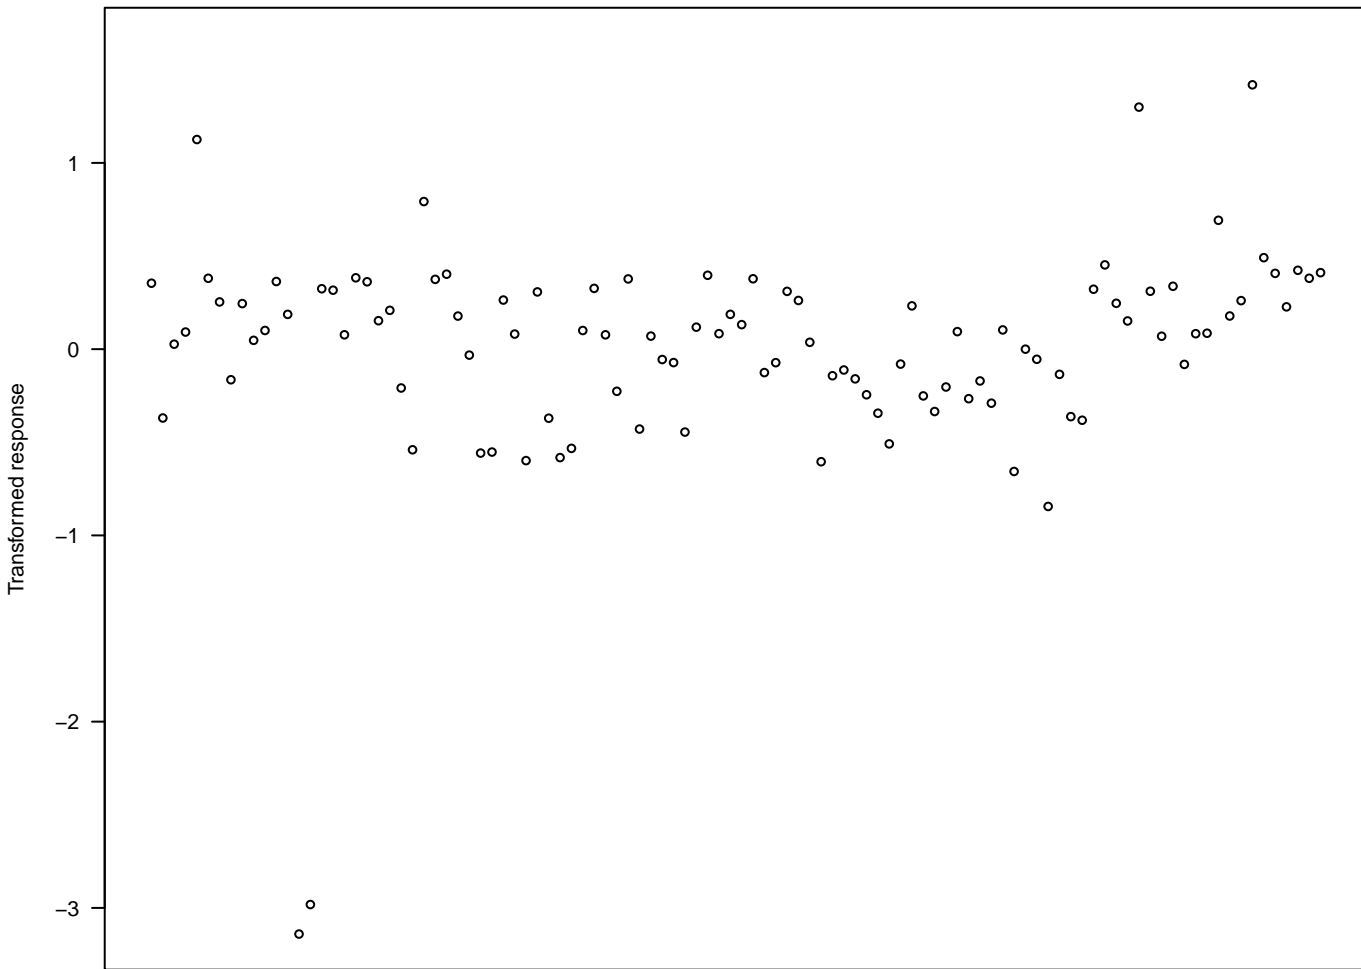

MRC Harwell

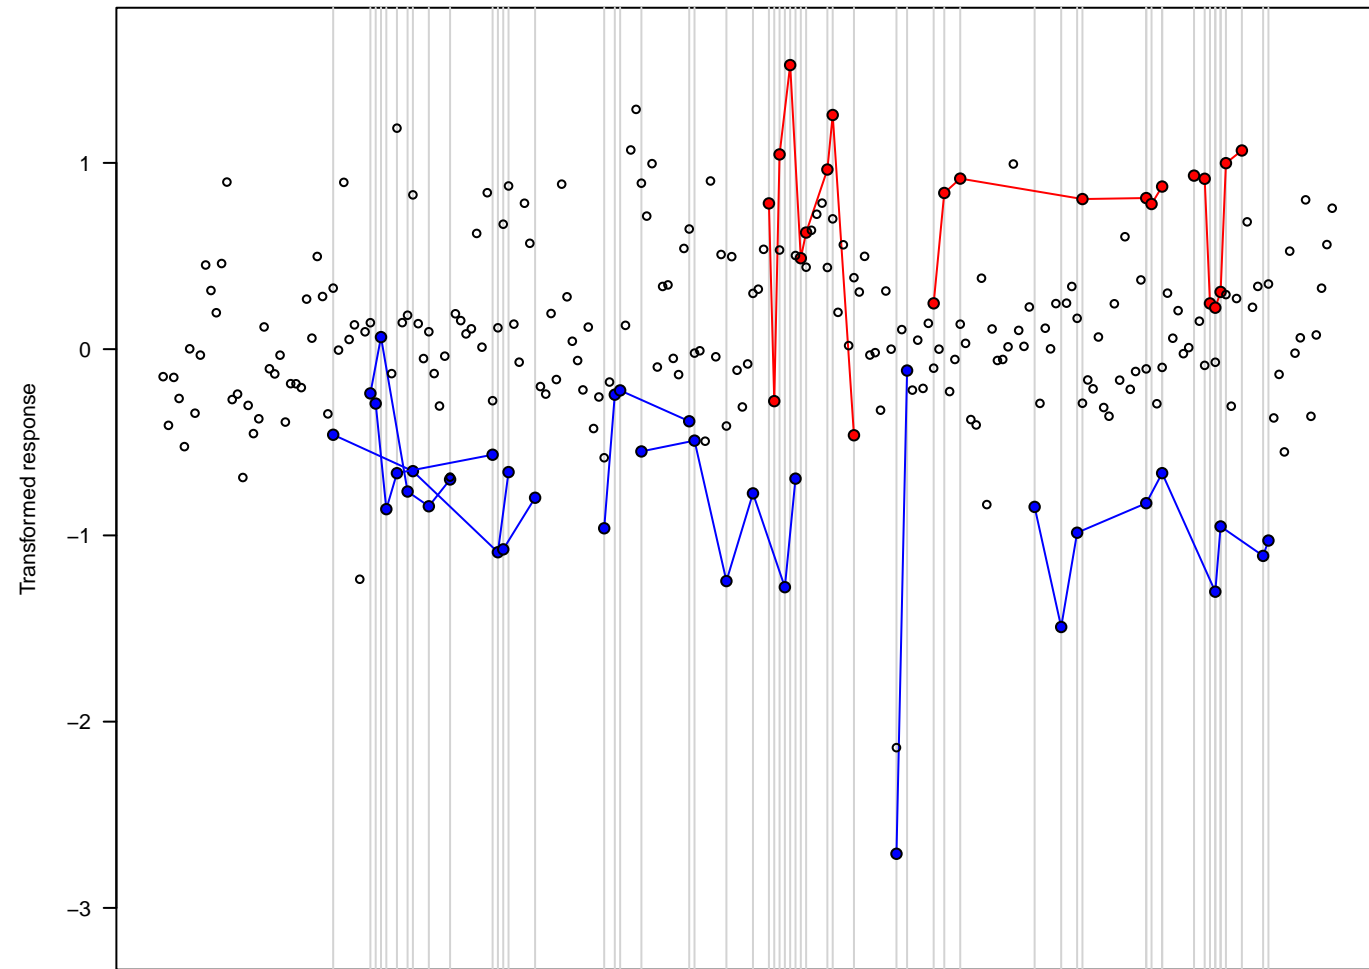

WTSI

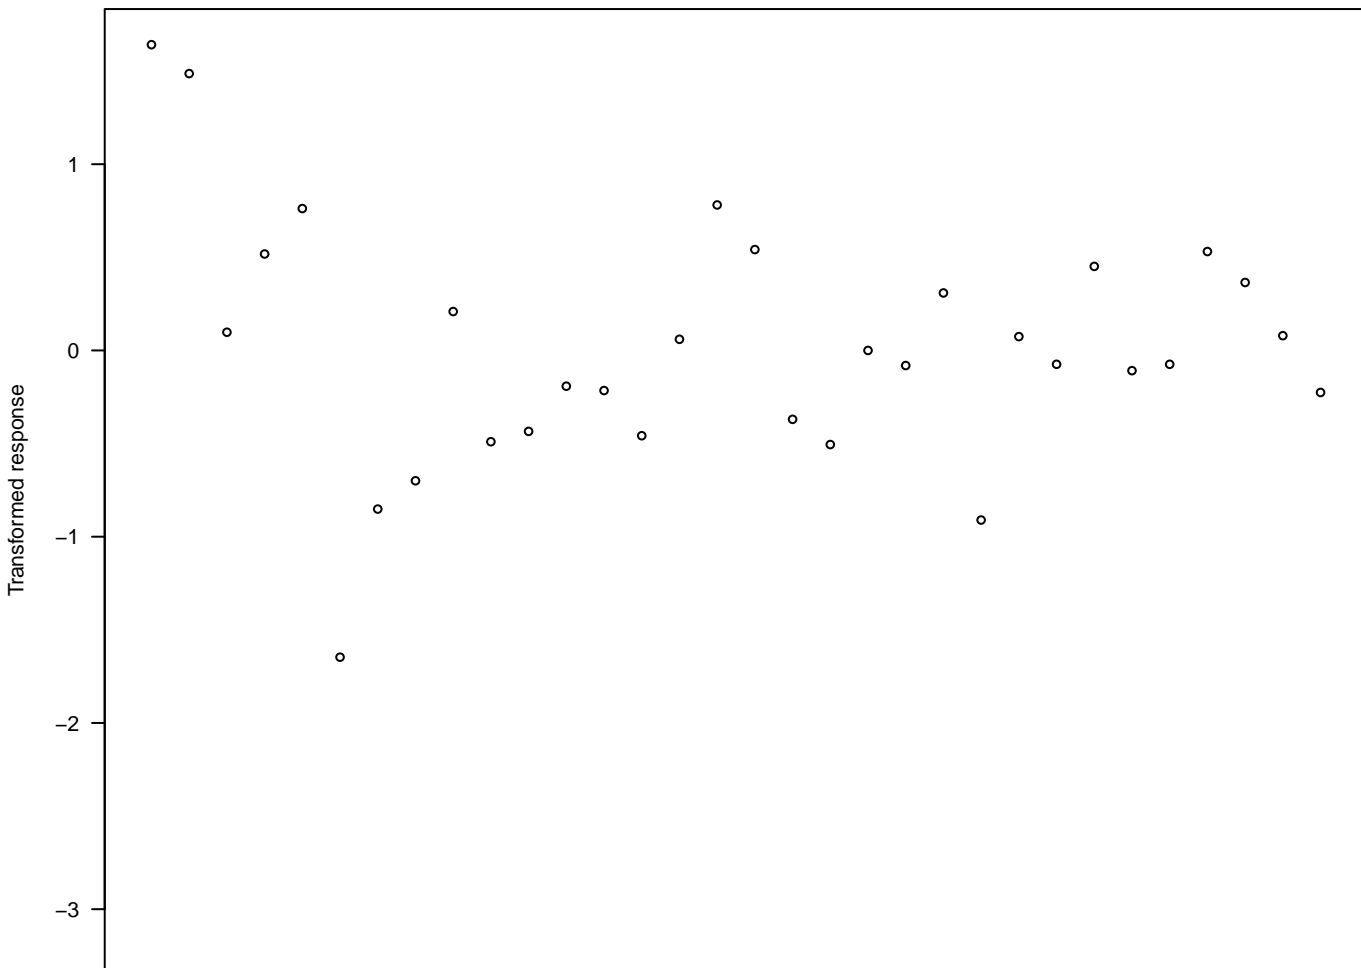

ICS

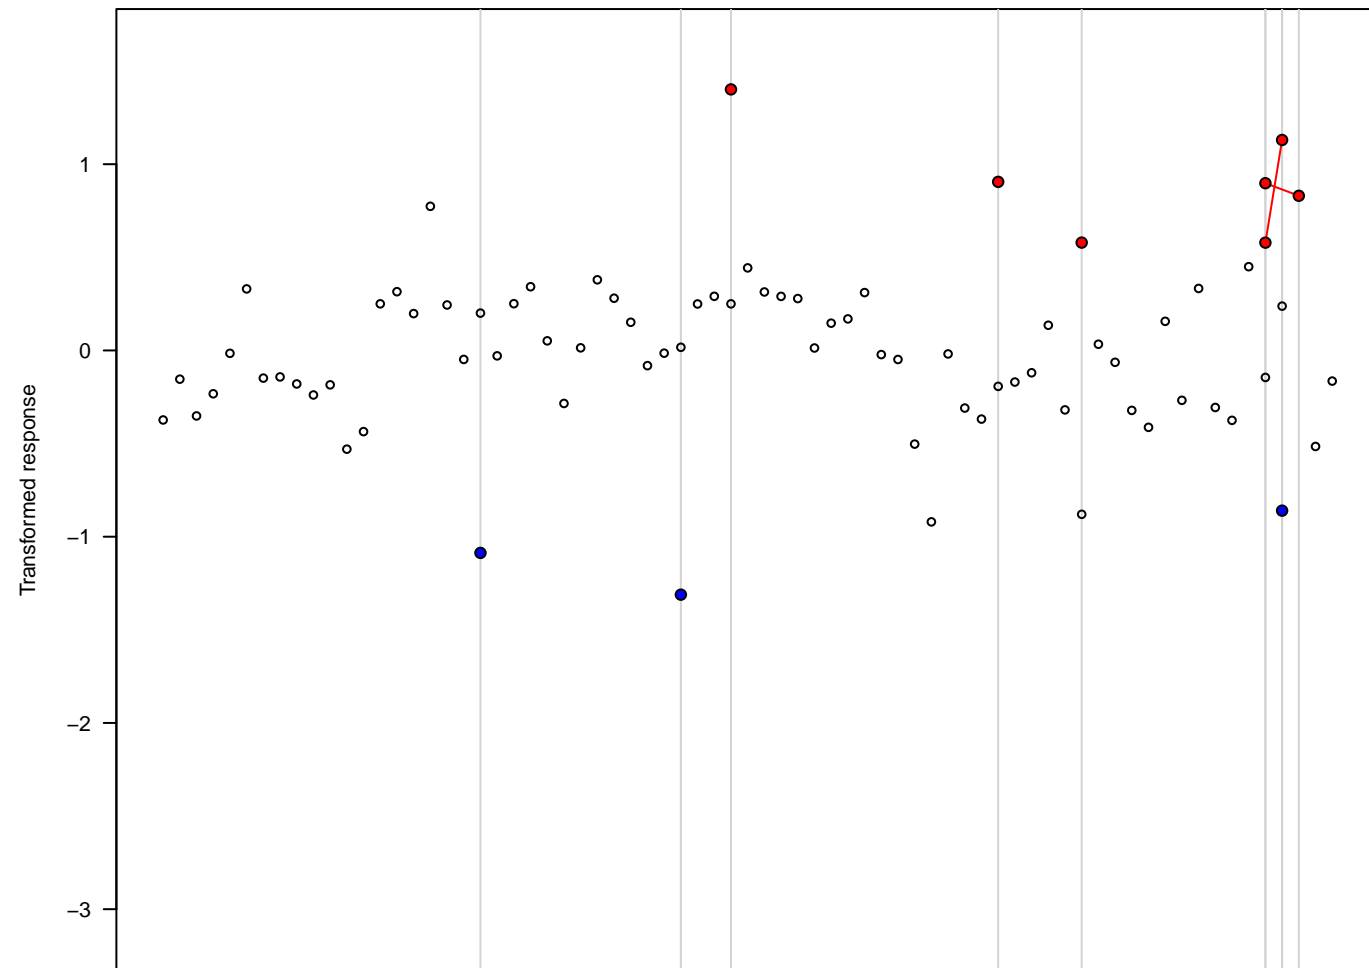

110dB startle magnitude  
(Acoustic Startle&PPI)

HMGU

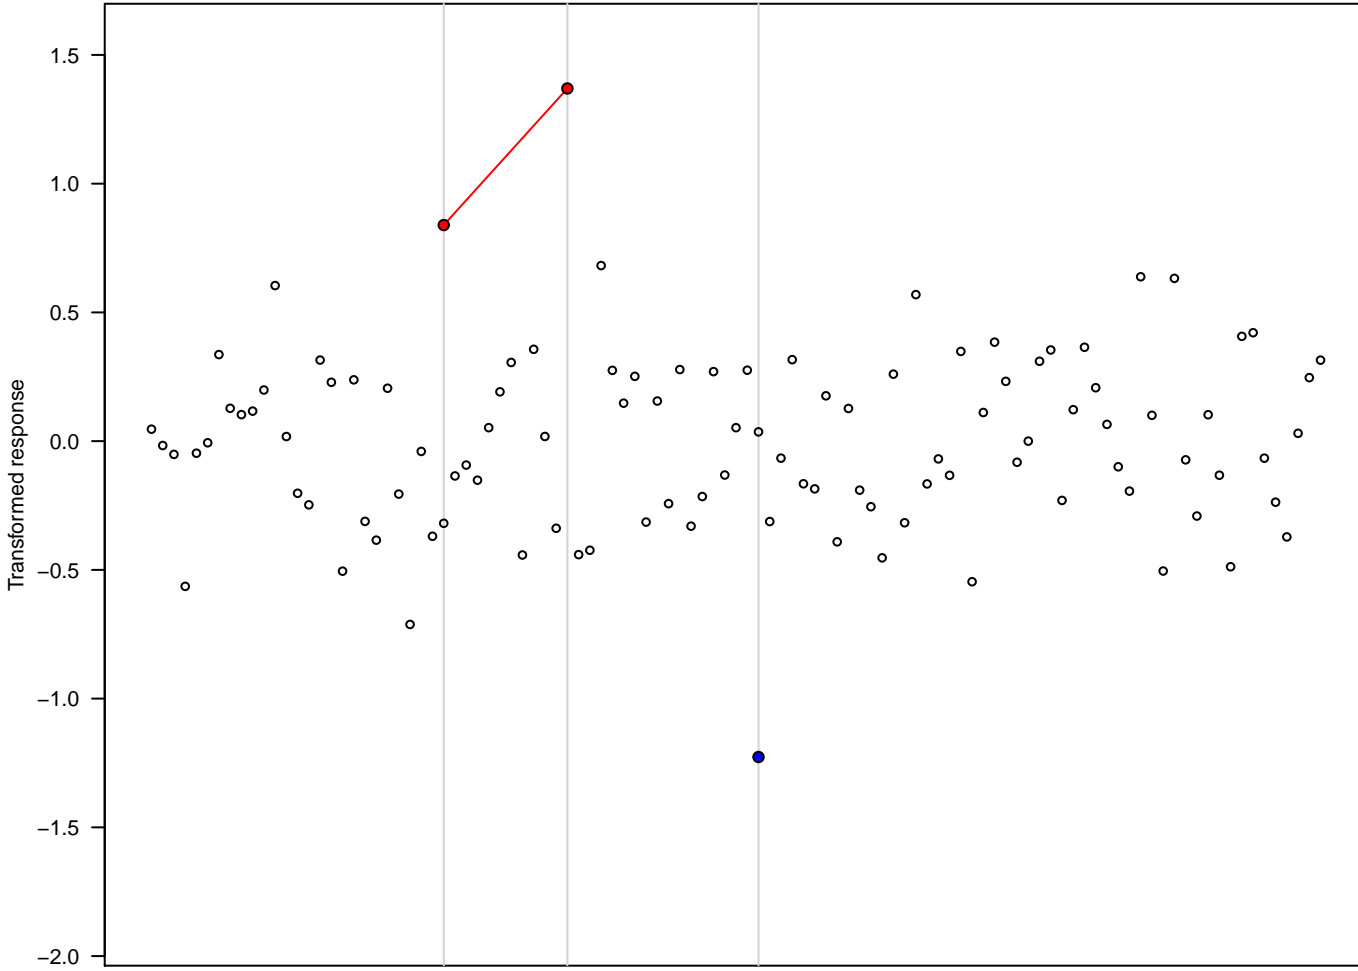

MRC Harwell

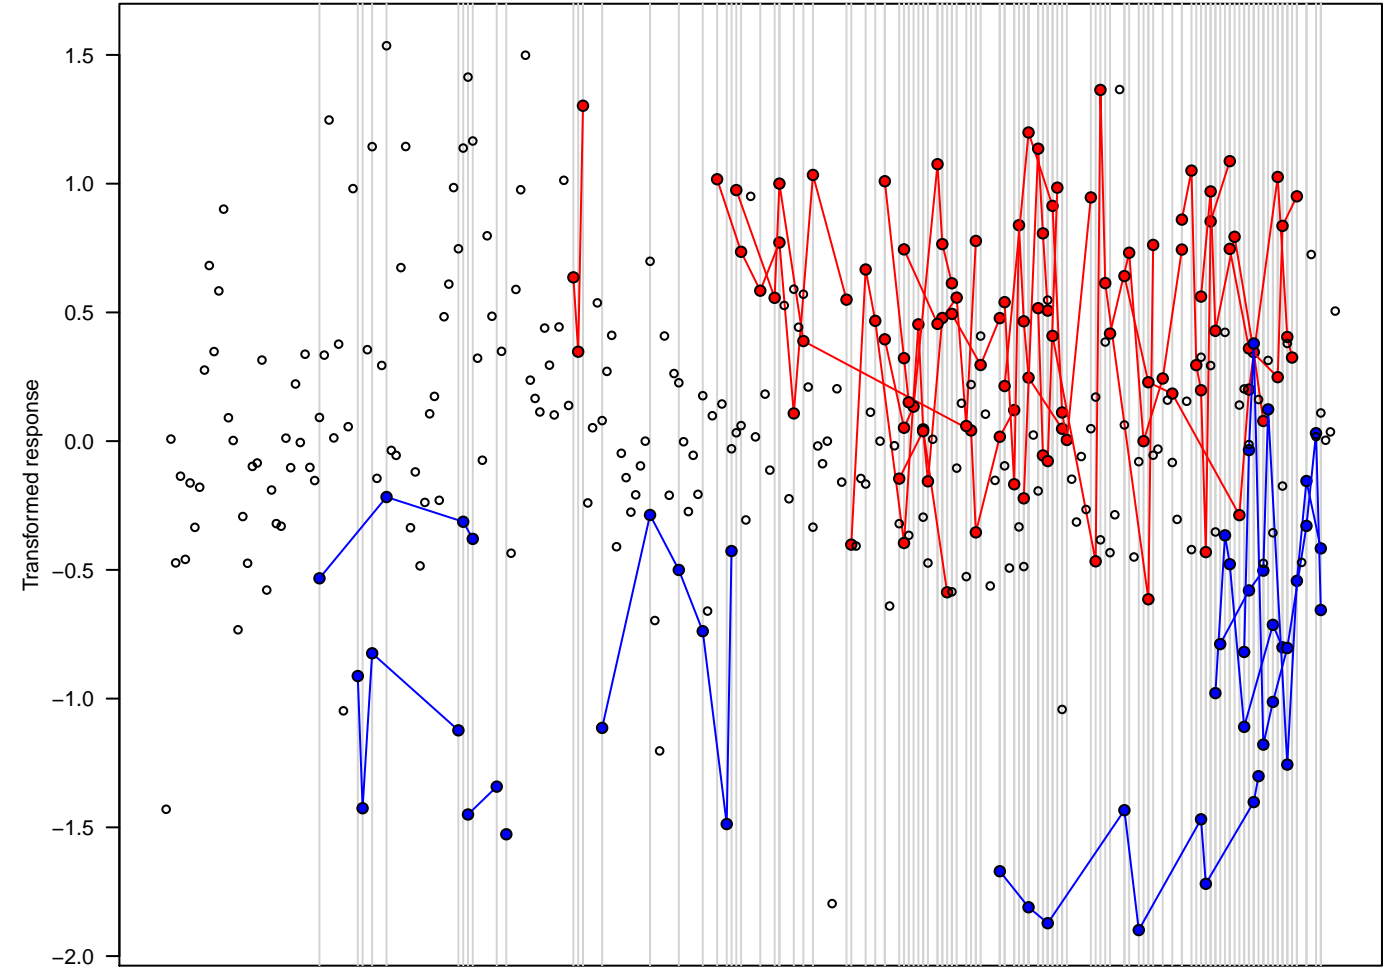

WTSI

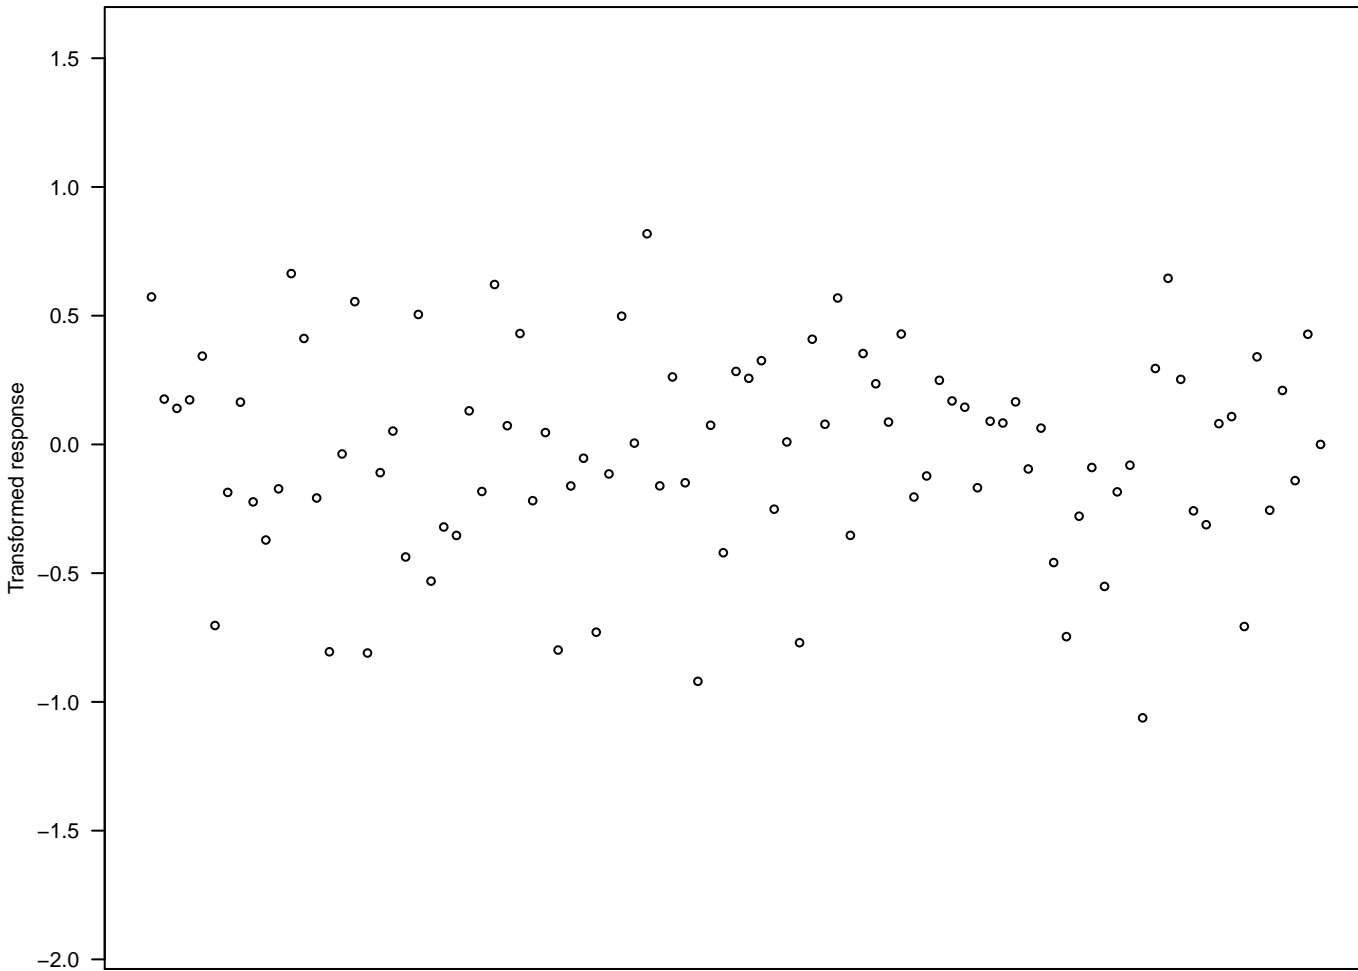

ICS

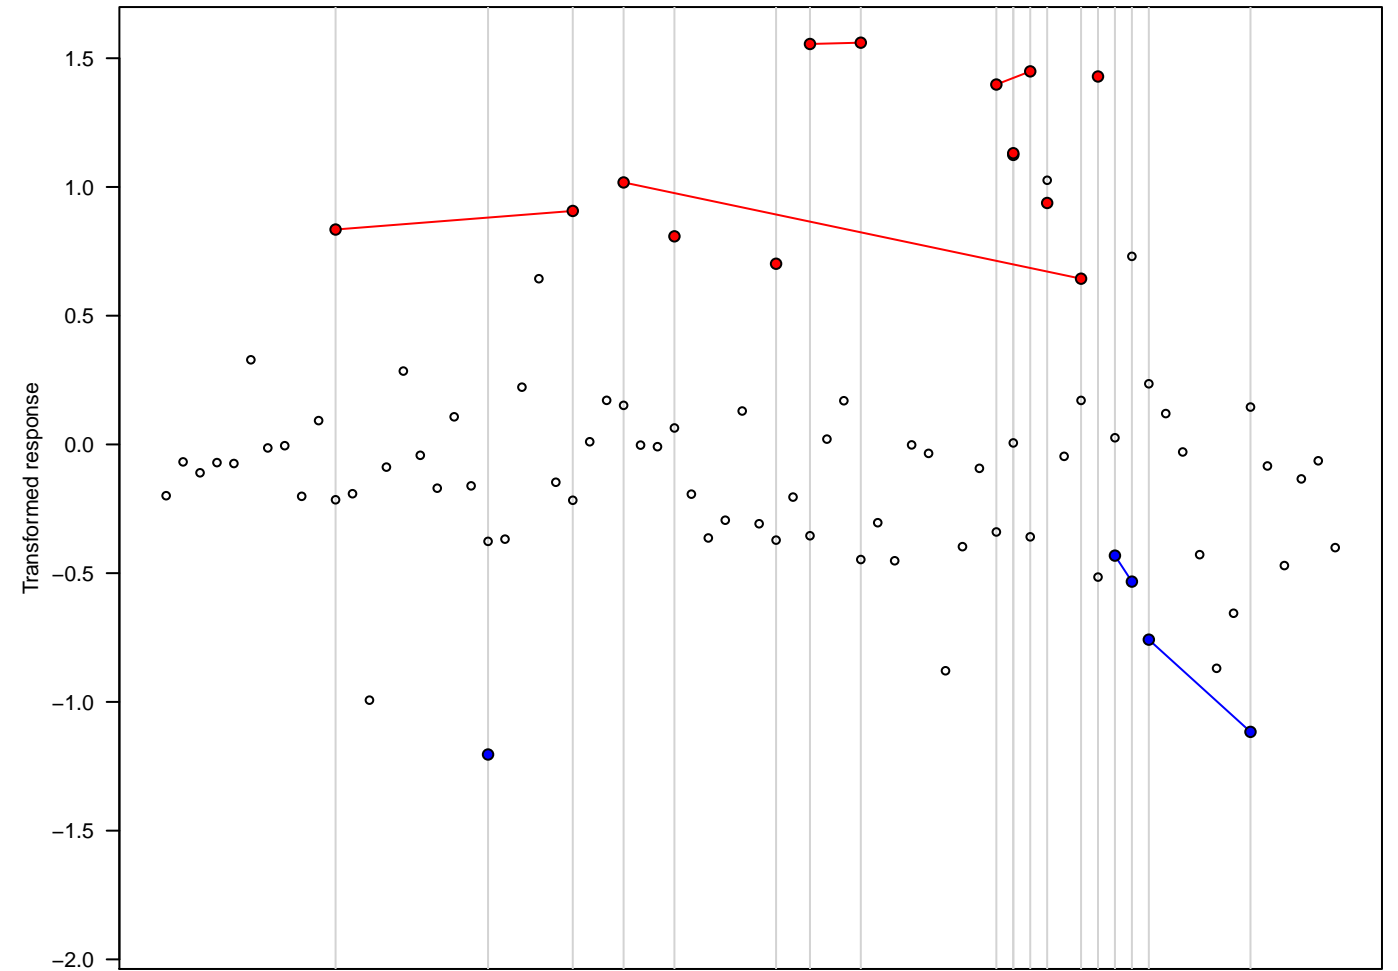

PP1 + pulse startle magnitude  
(Acoustic Startle&PPI)

HMGU

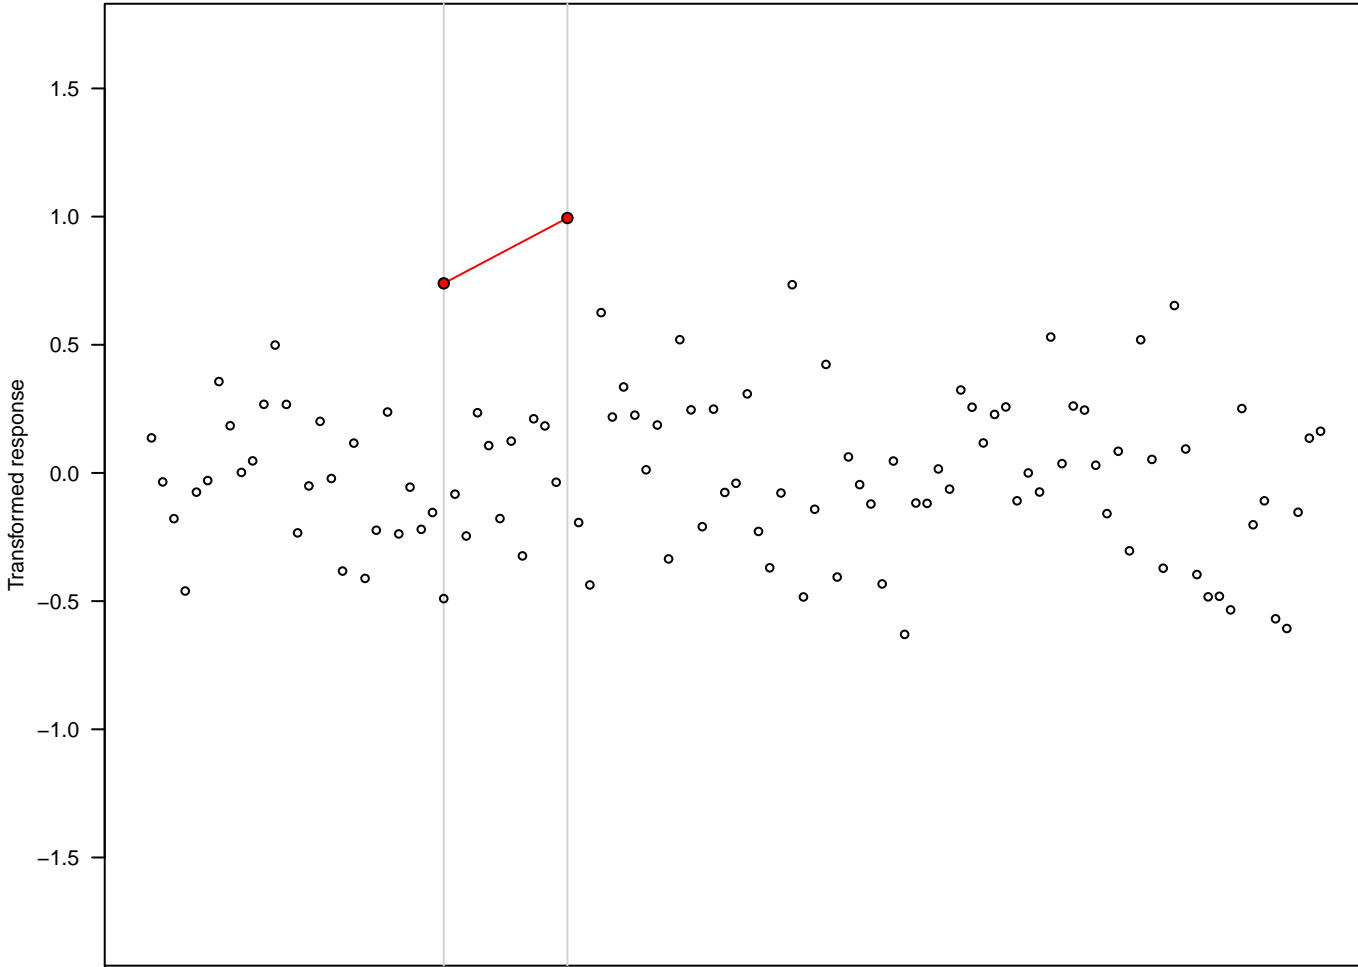

MRC Harwell

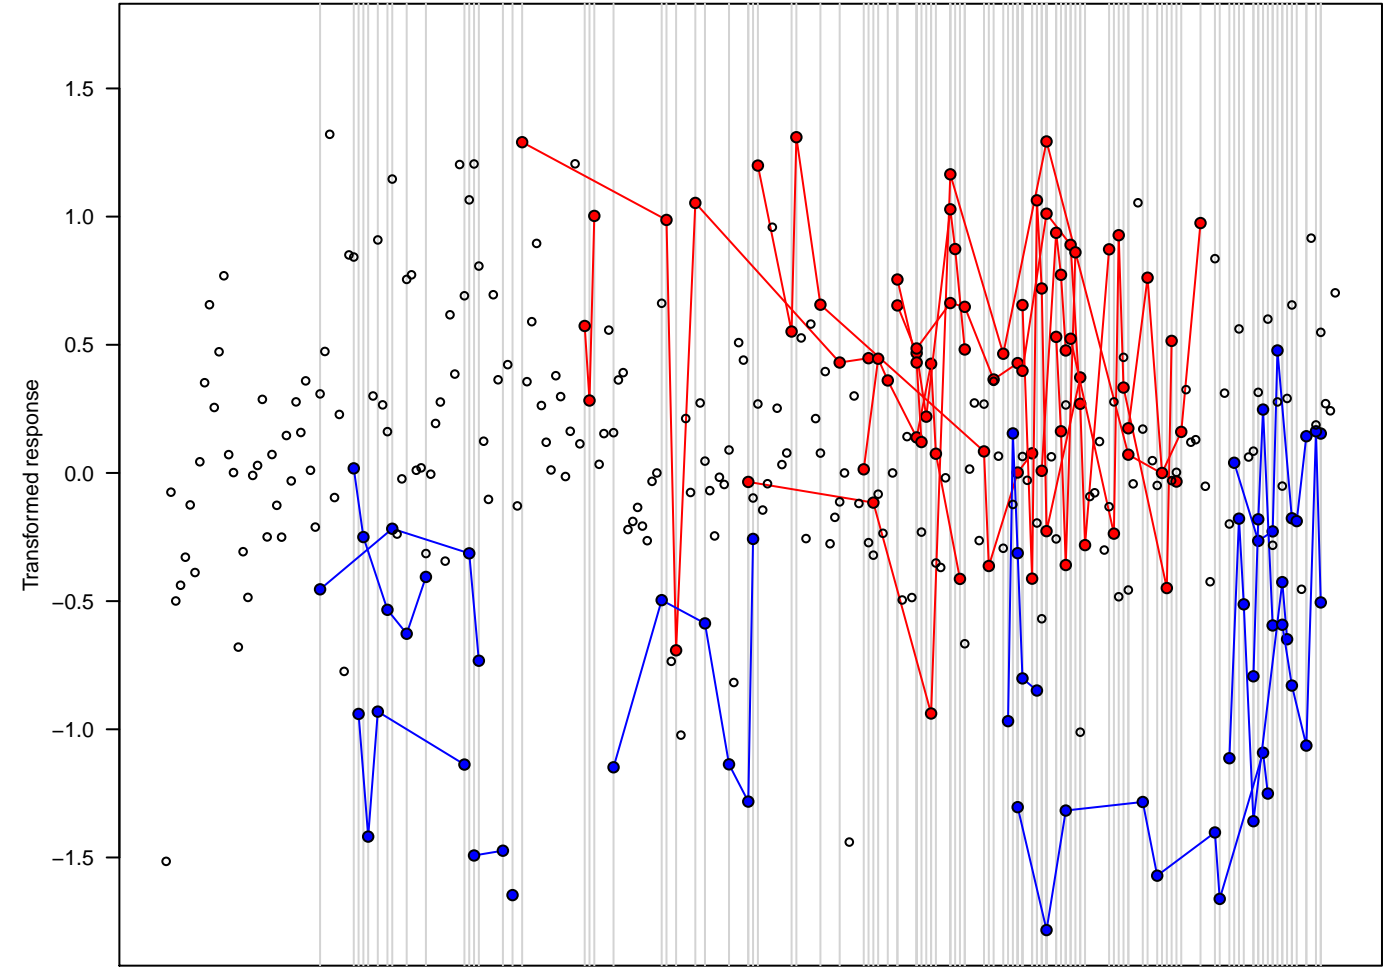

WTSI

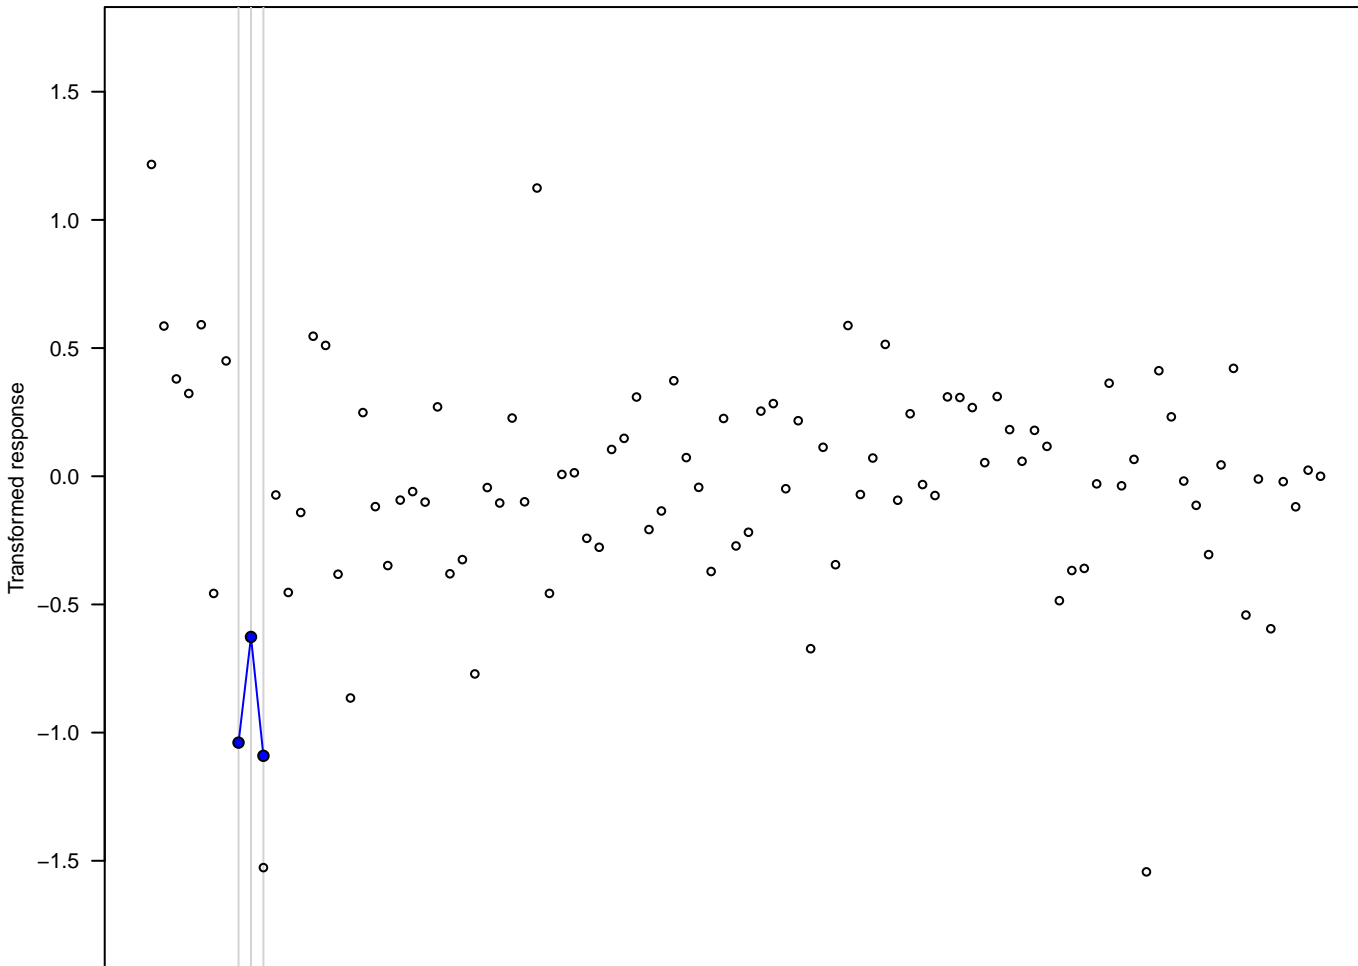

ICS

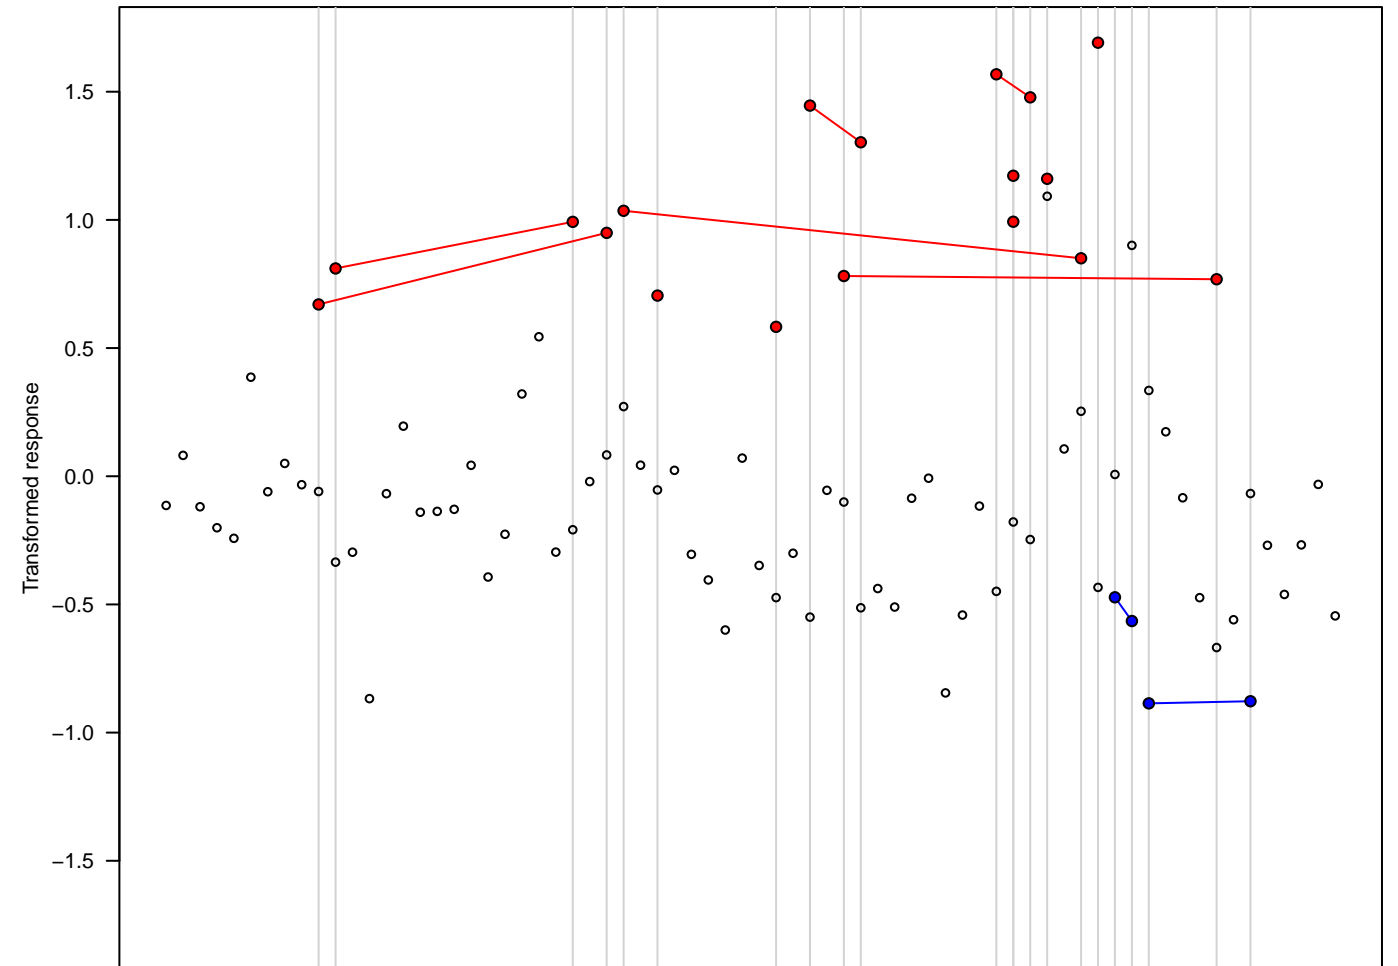

PP2 + pulse startle magnitude  
(Acoustic Startle&PPI)

HMGU

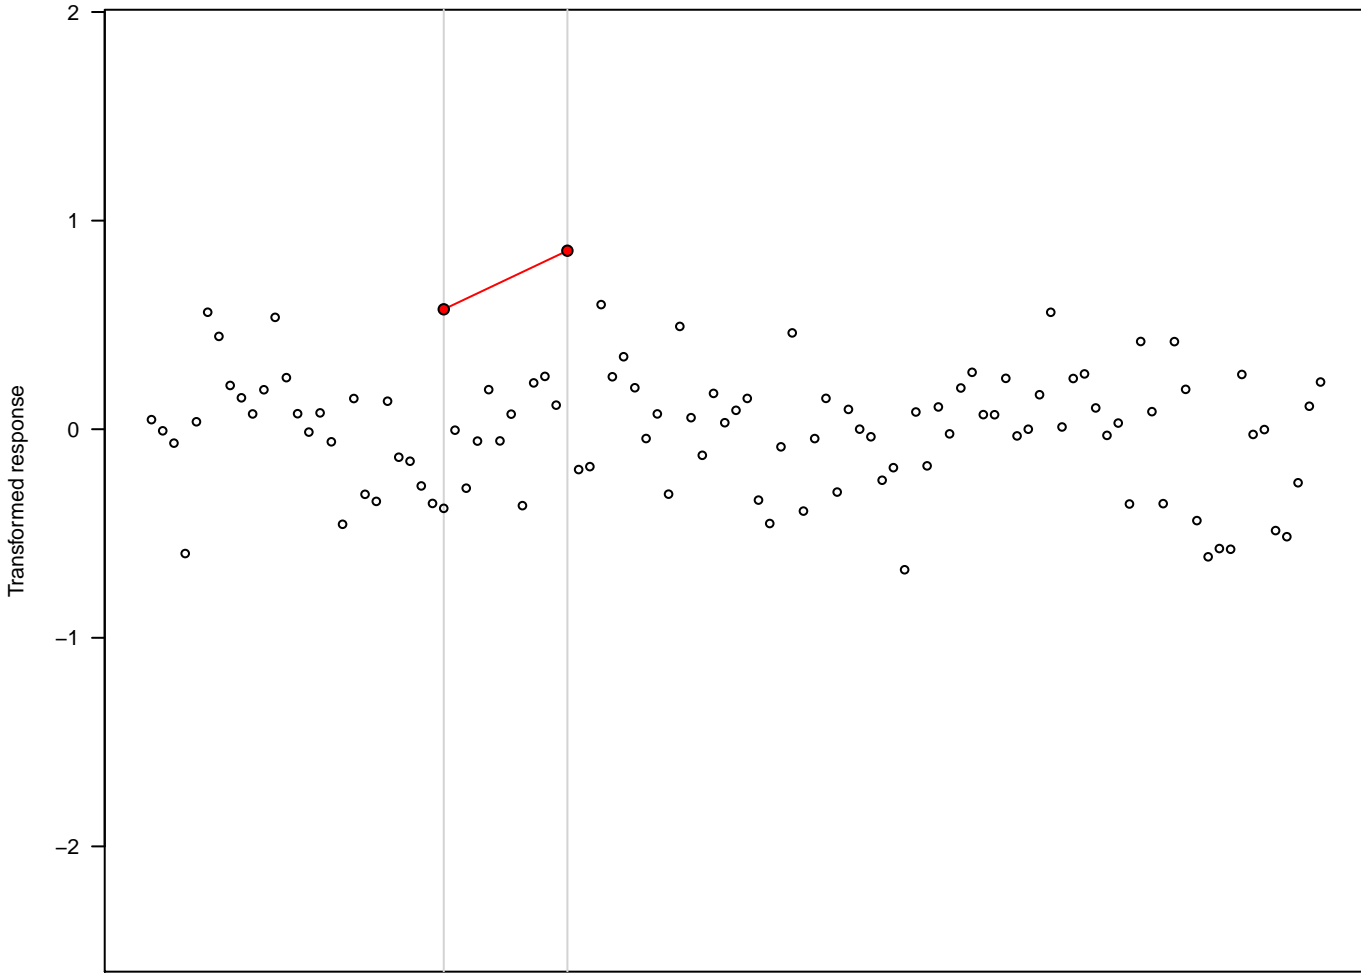

MRC Harwell

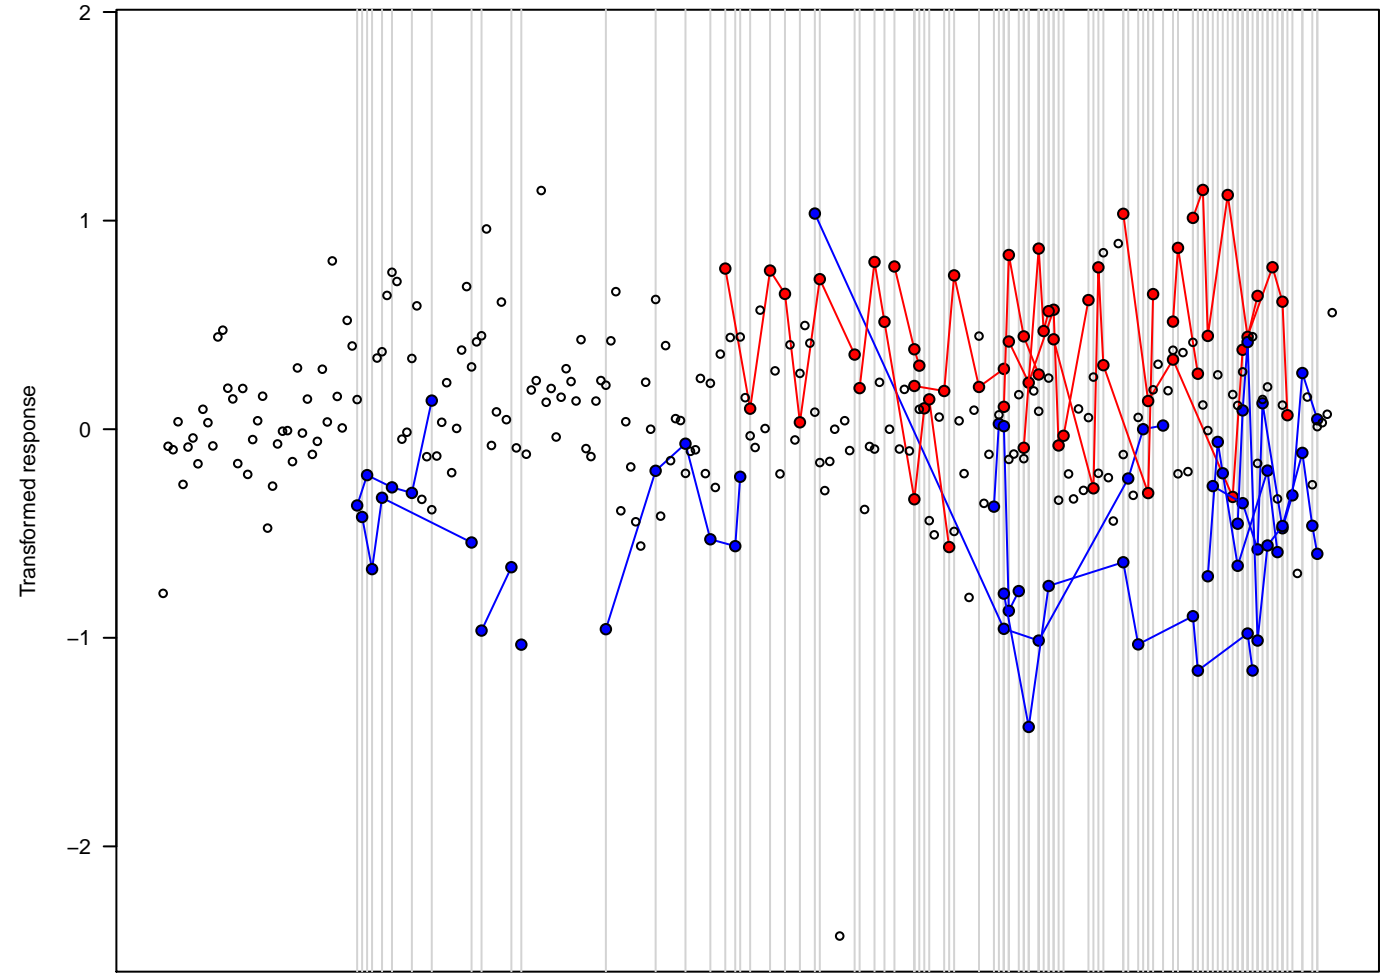

WTSI

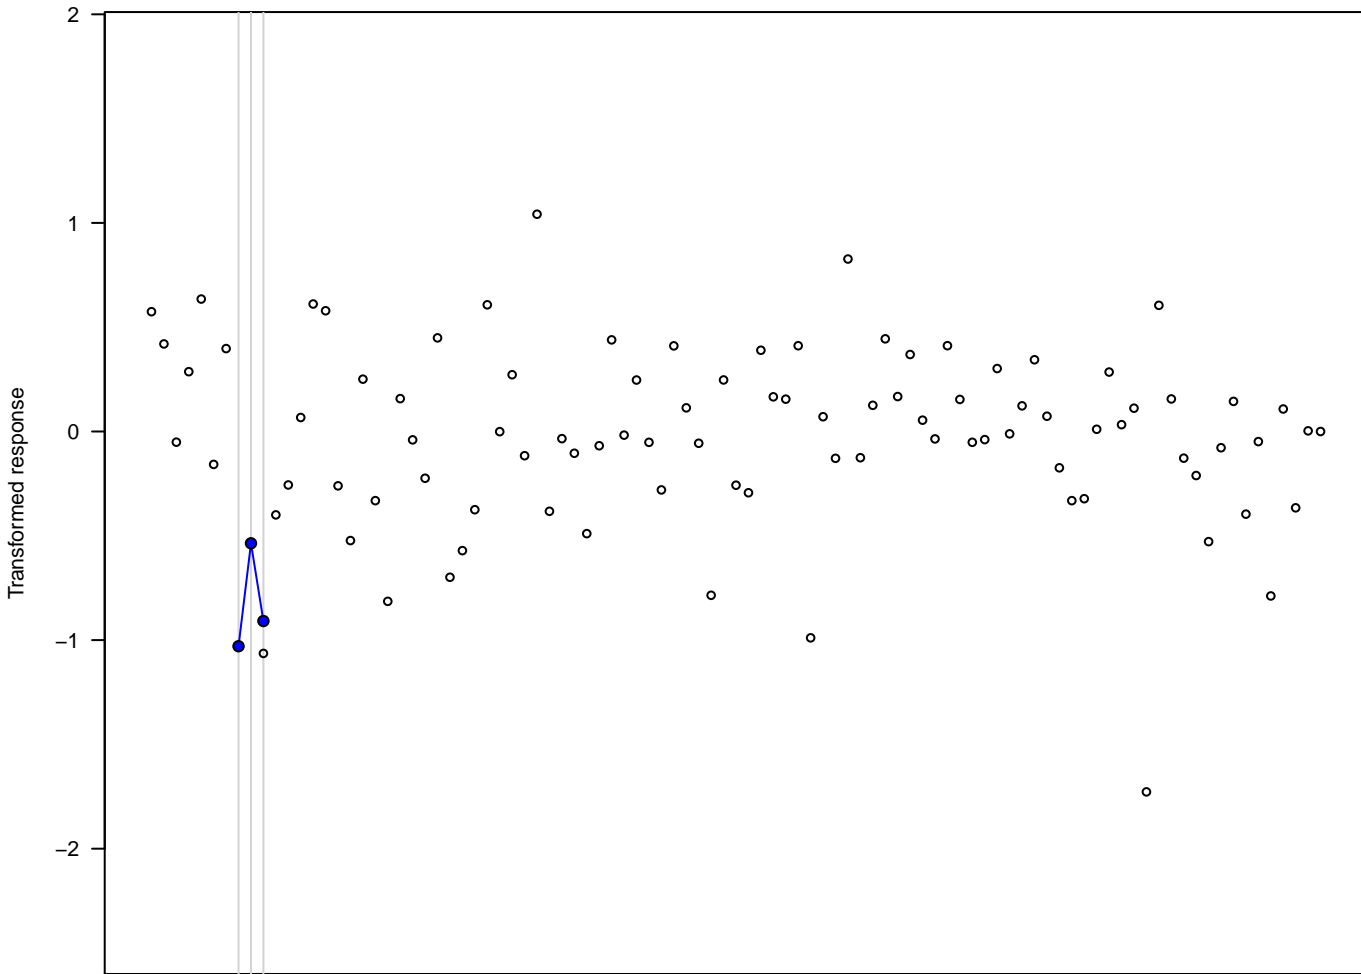

ICS

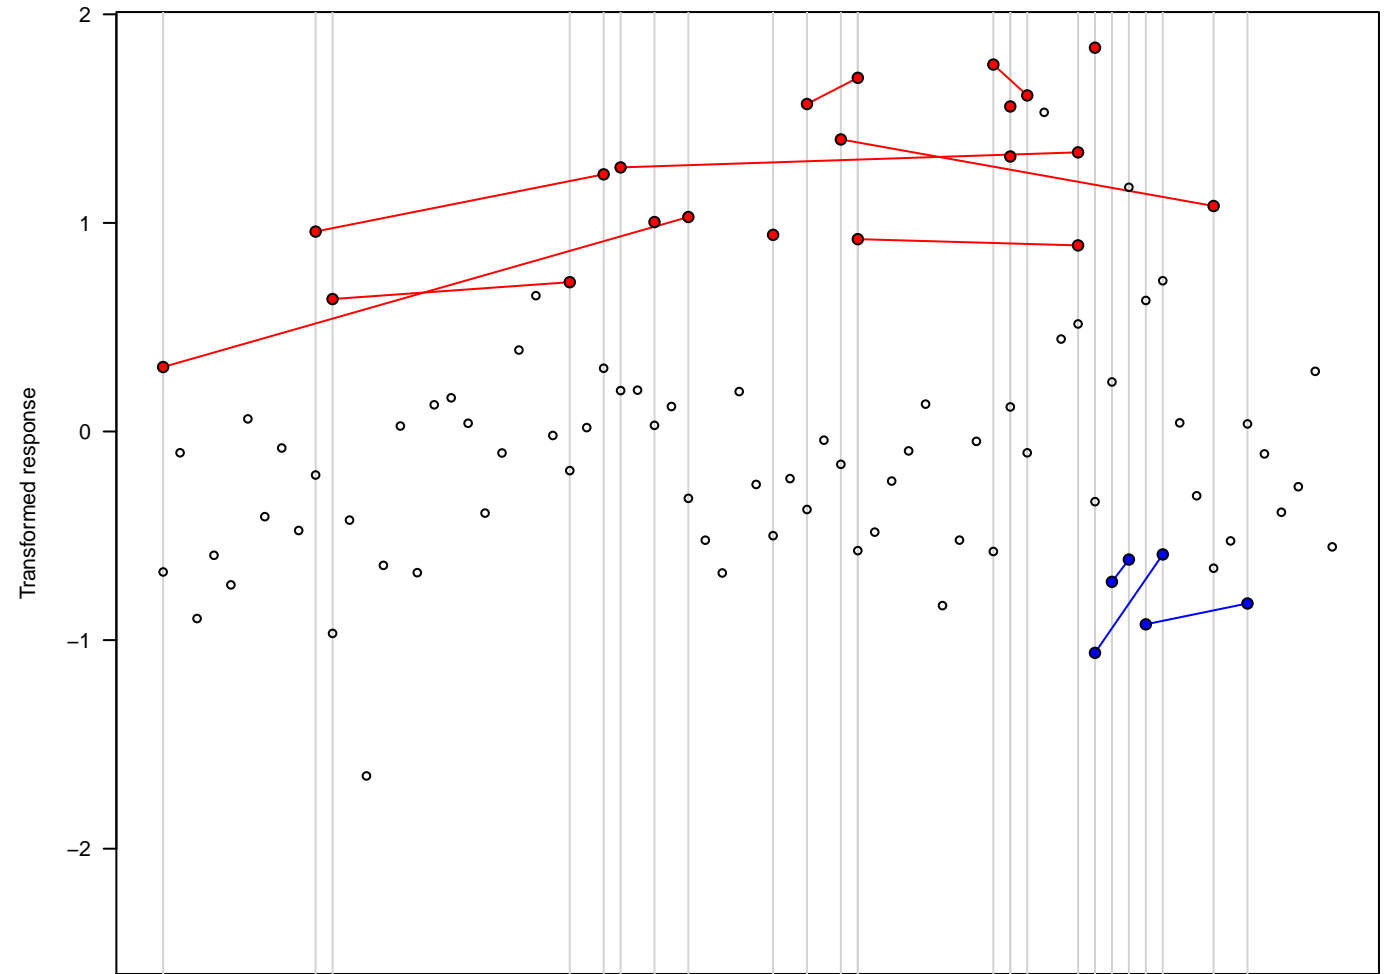

PP3 + pulse startle magnitude  
(Acoustic Startle&PPI)

HMGU

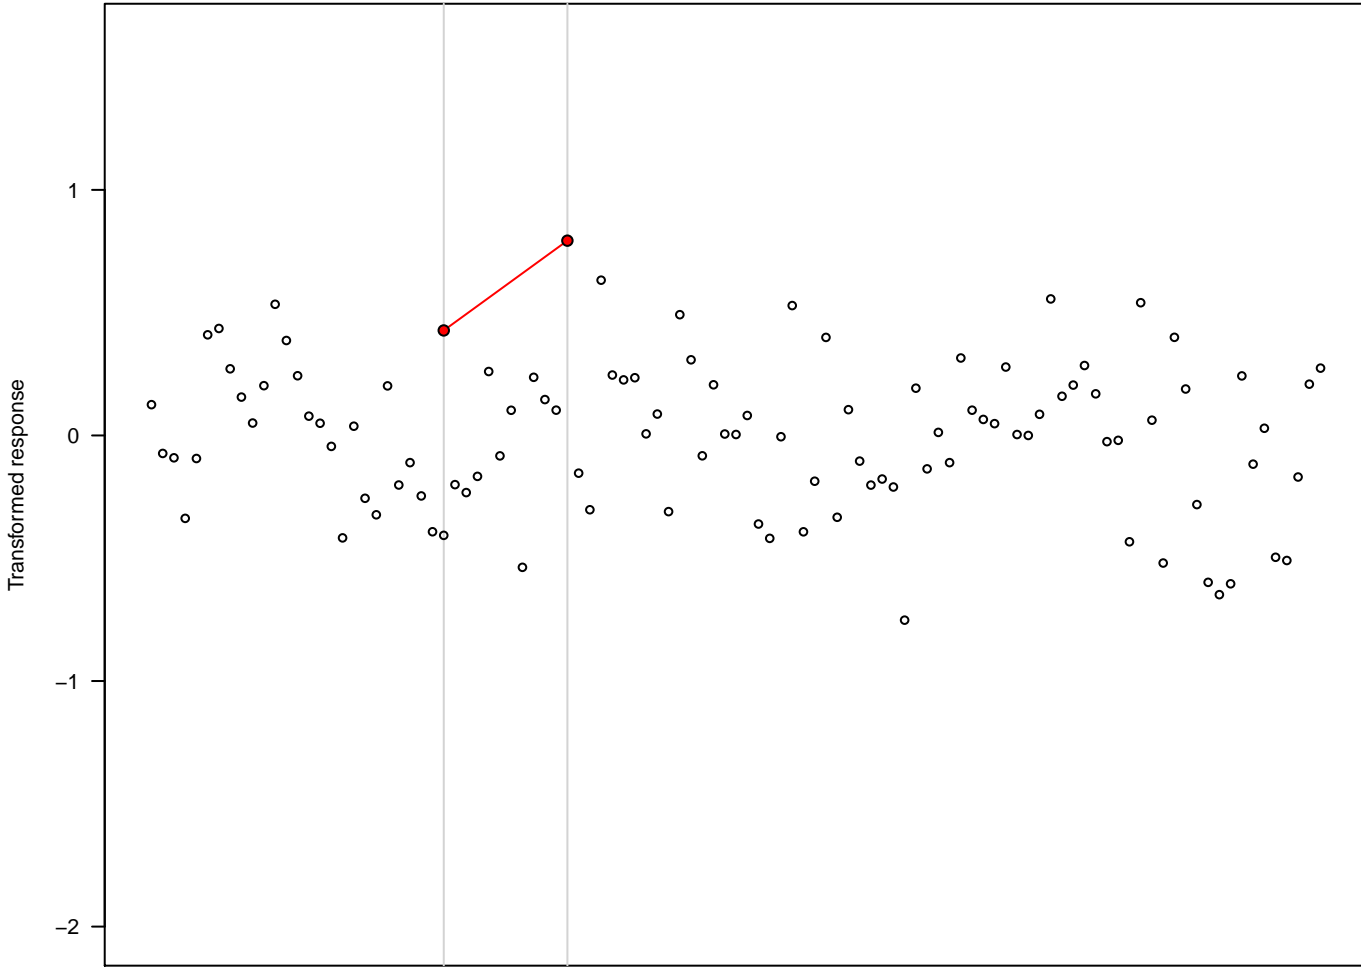

MRC Harwell

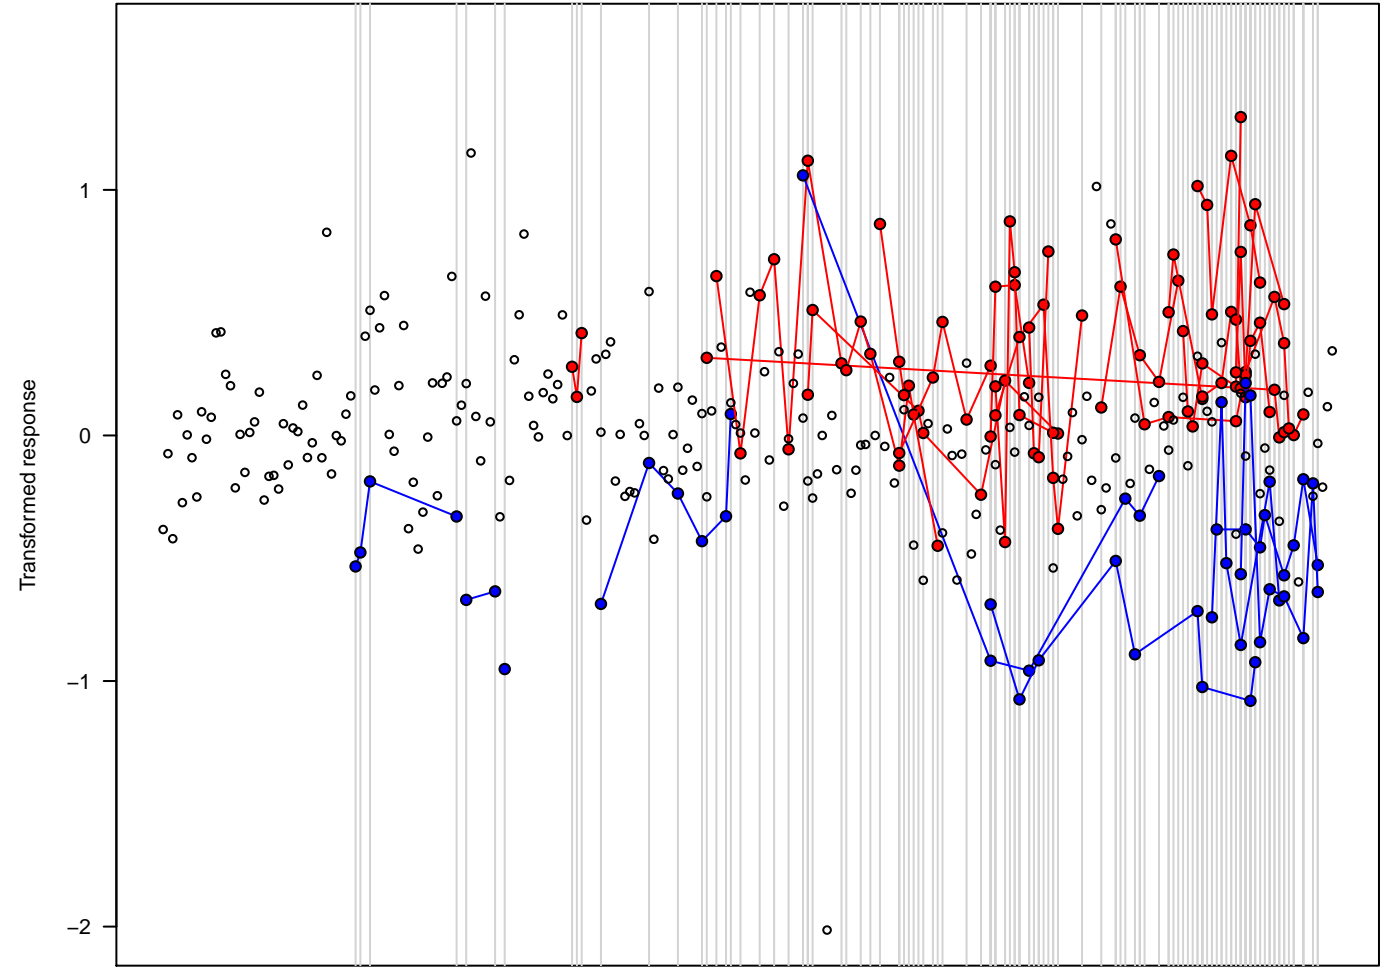

WTSI

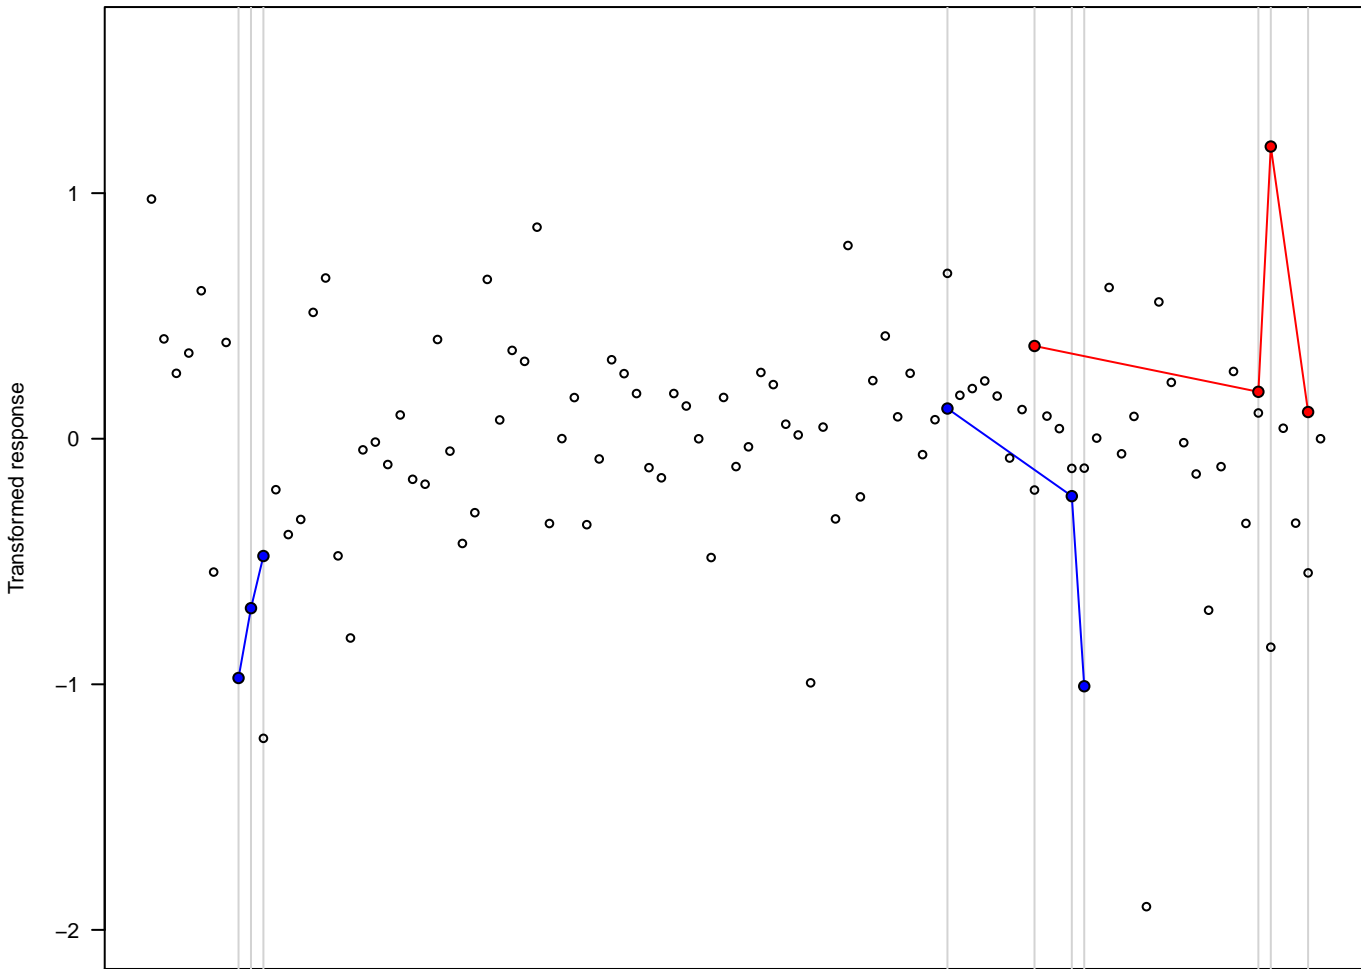

ICS

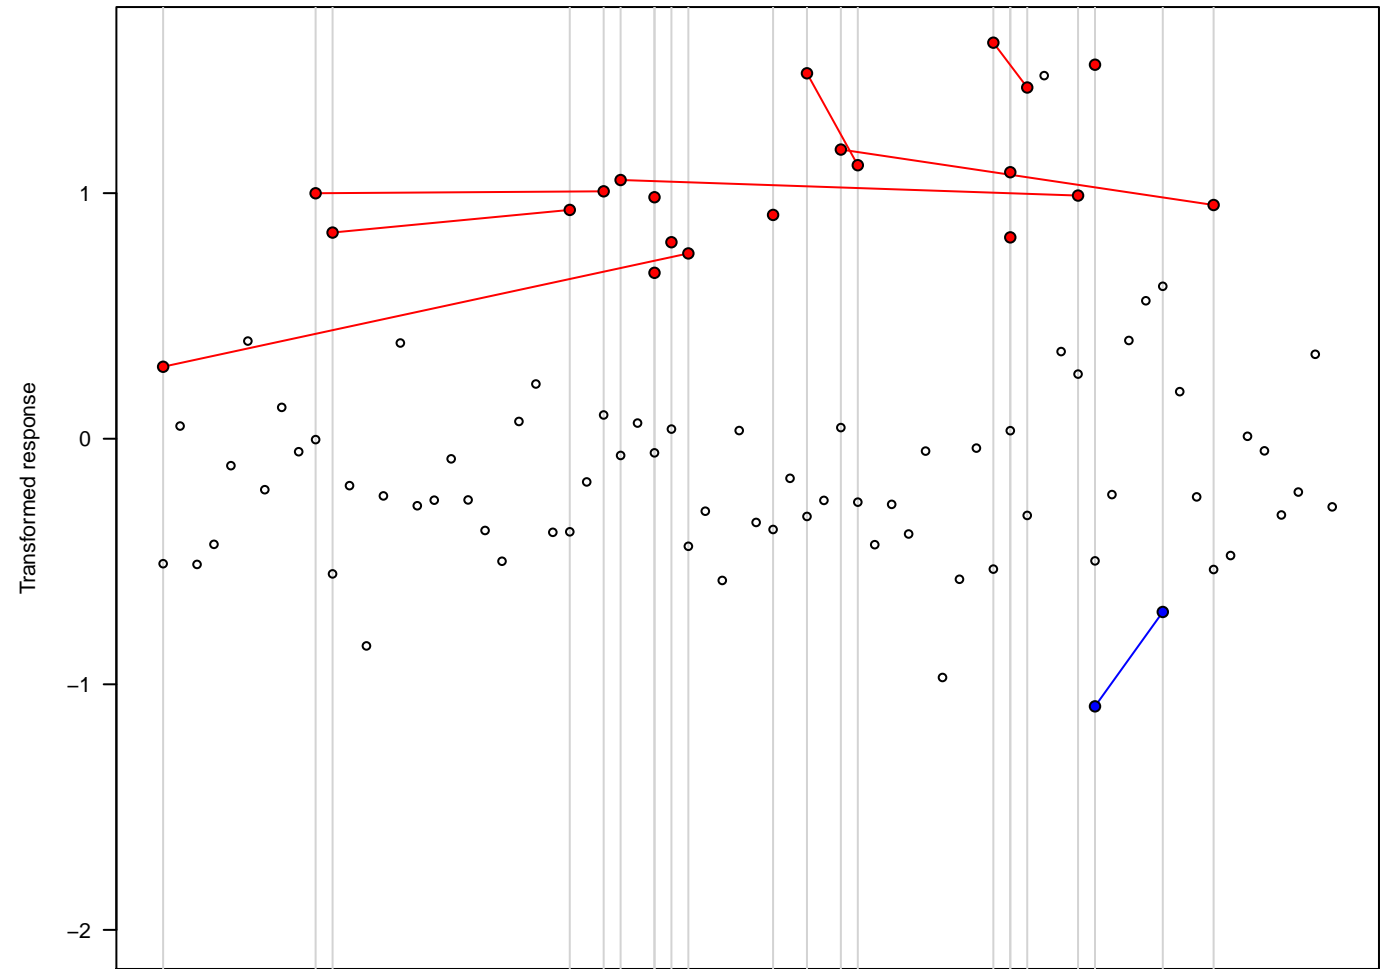

PP4 + pulse startle magnitude  
(Acoustic Startle&PPI)

HMGU

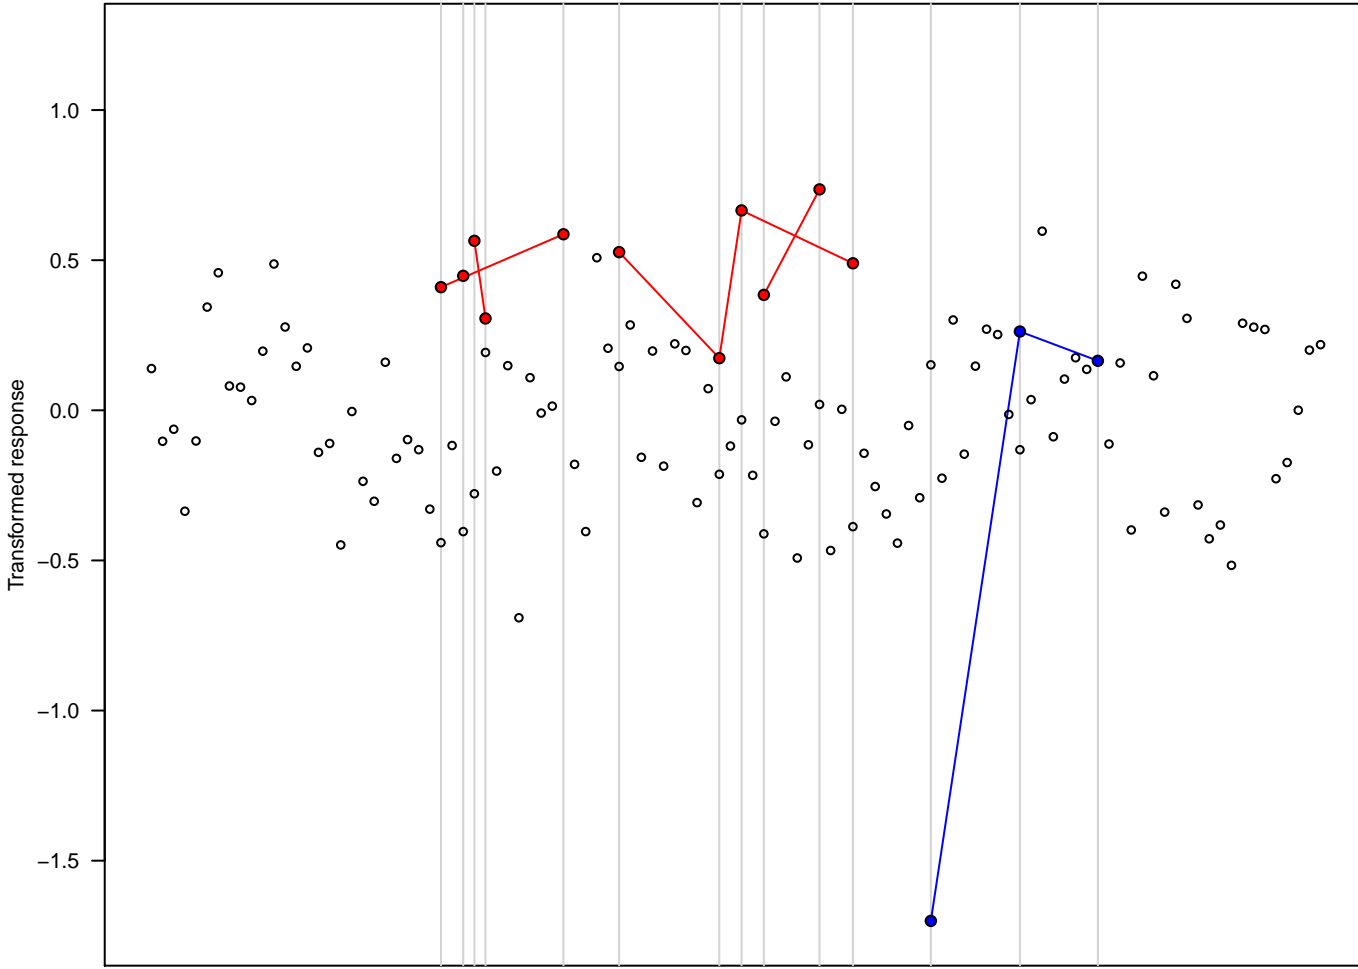

MRC Harwell

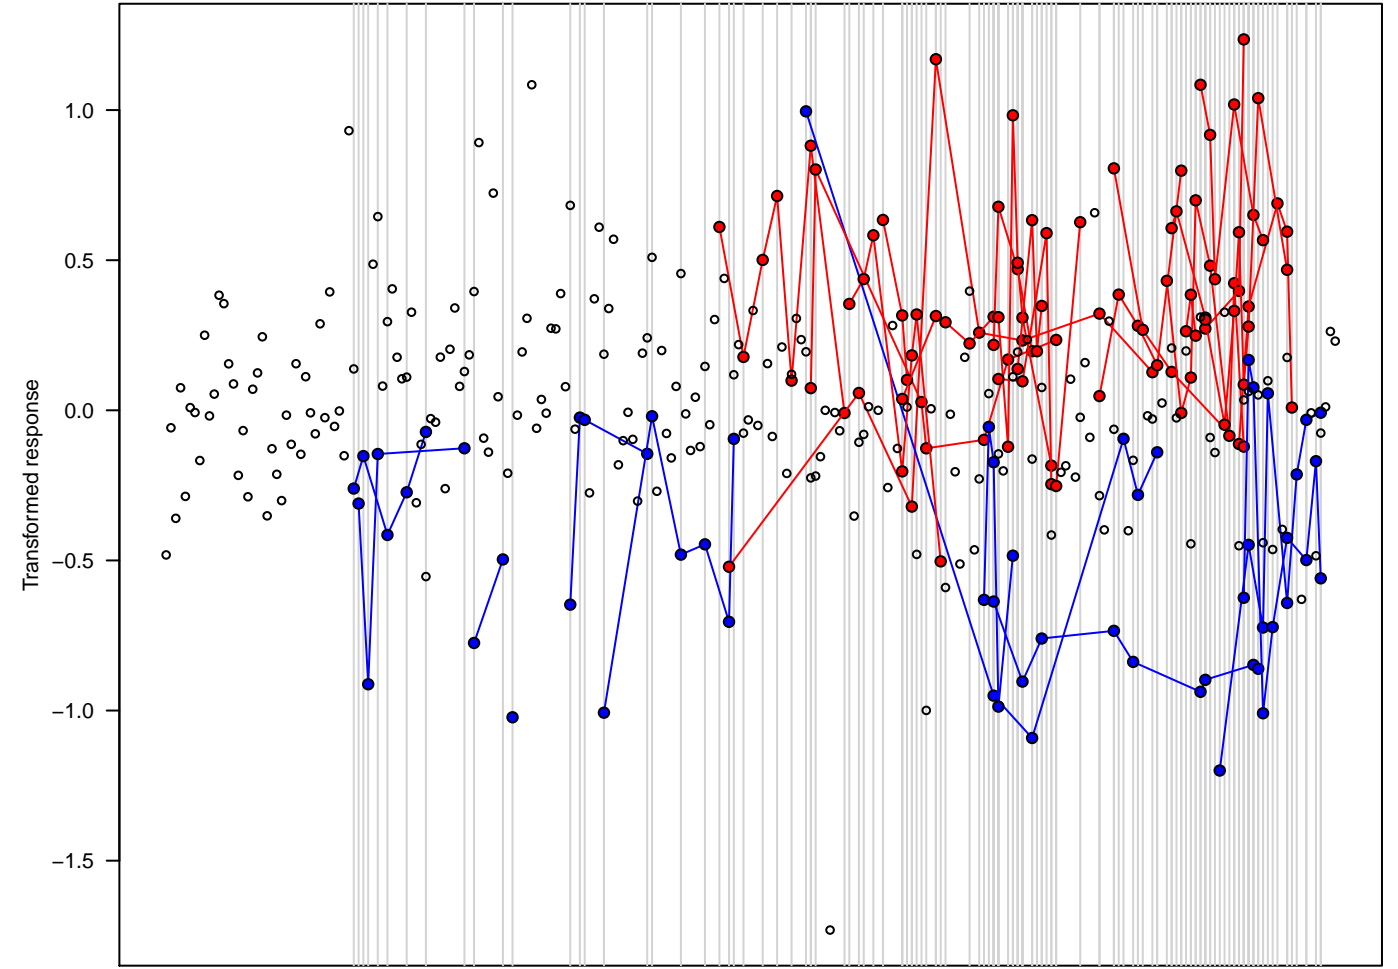

WTSI

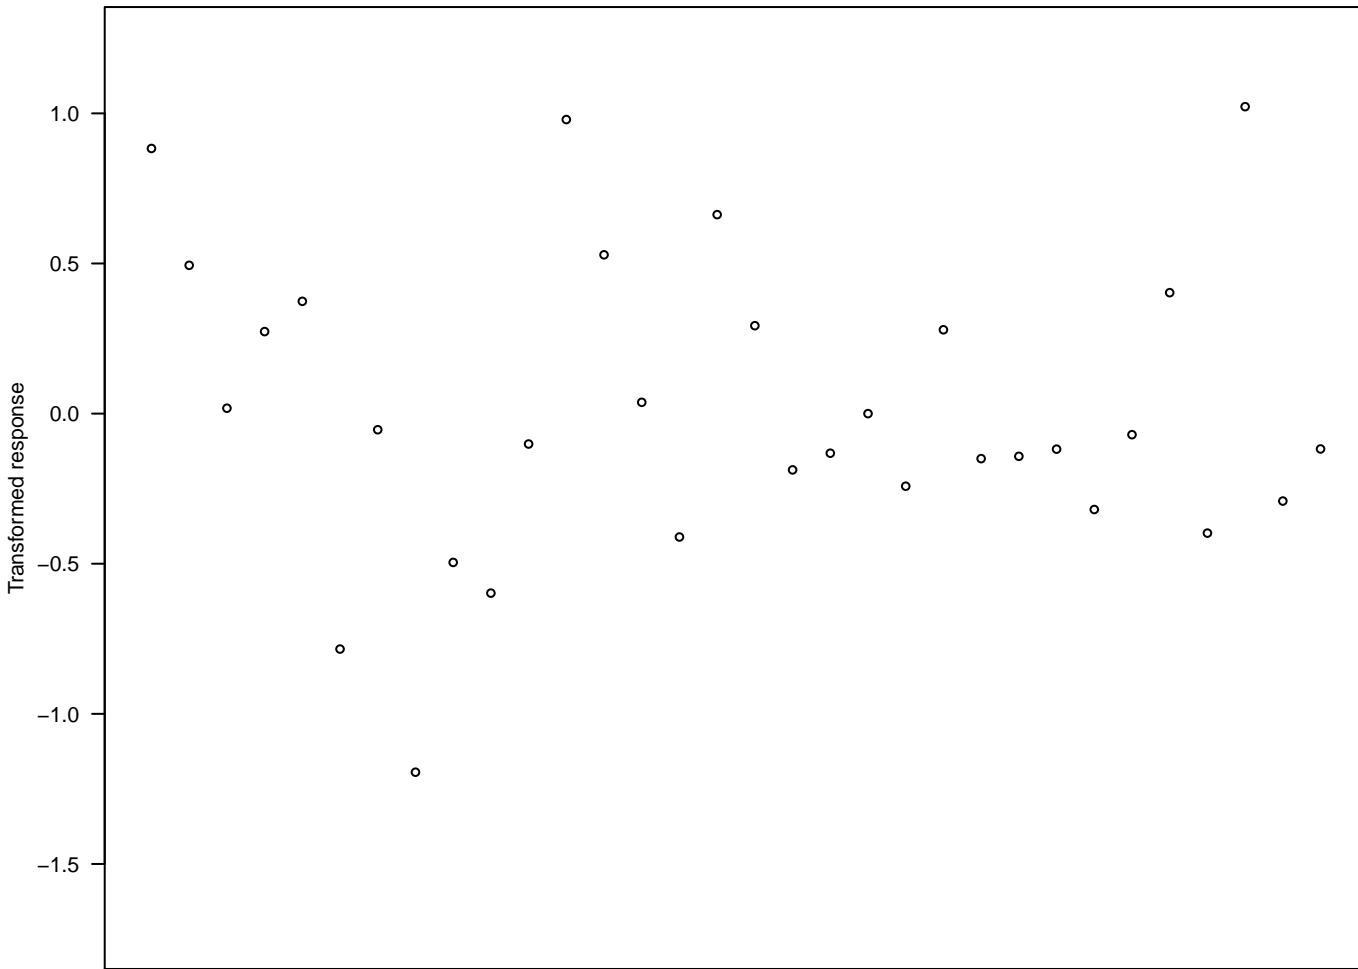

ICS

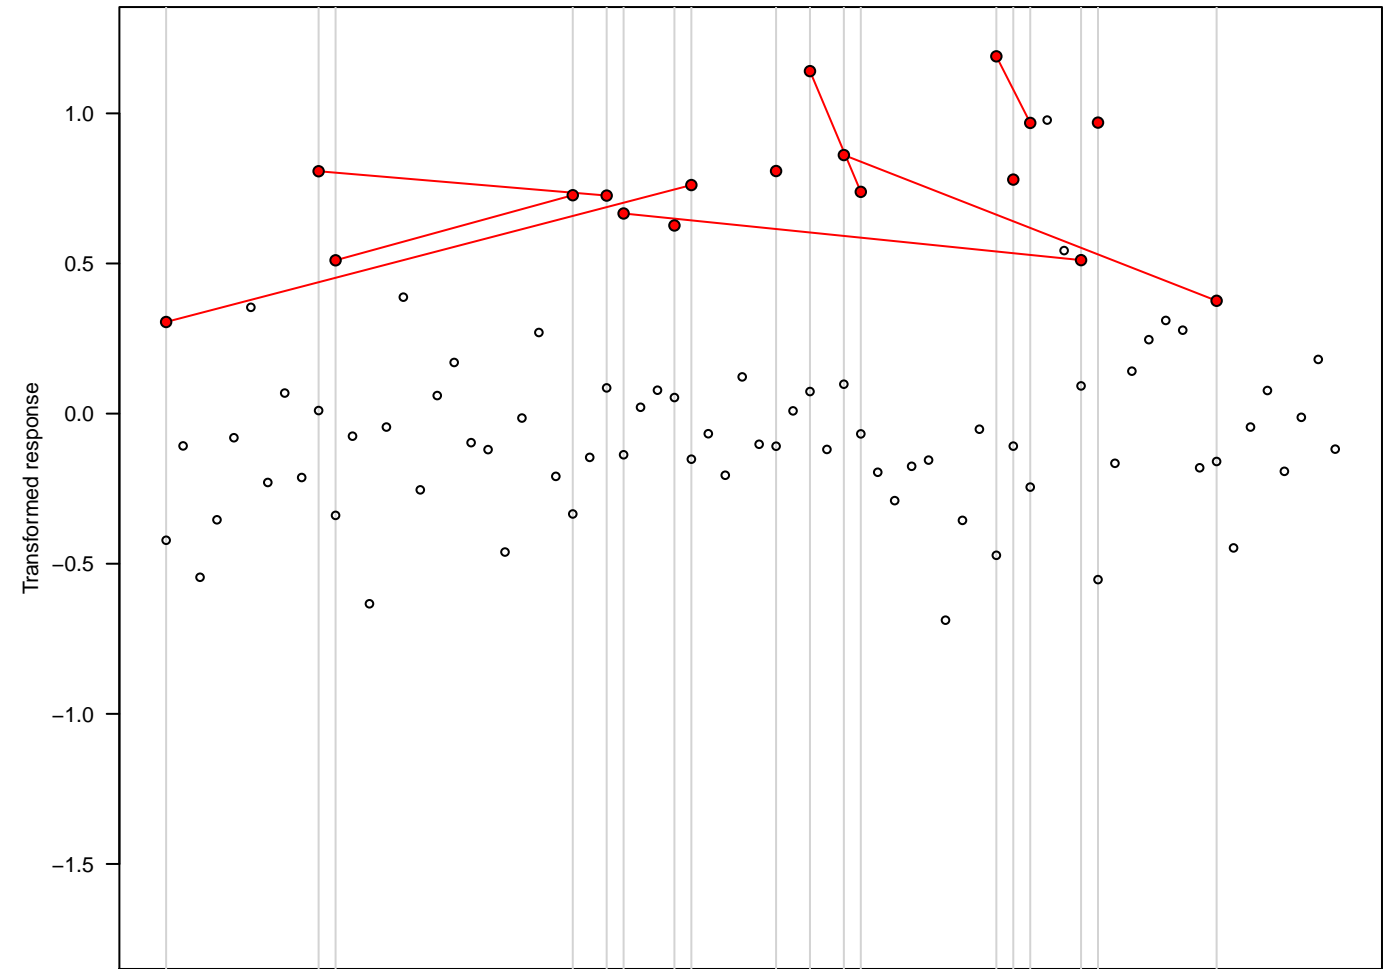

Prepulse inhibition – PP1  
(Acoustic Startle&PPI)

HMGU

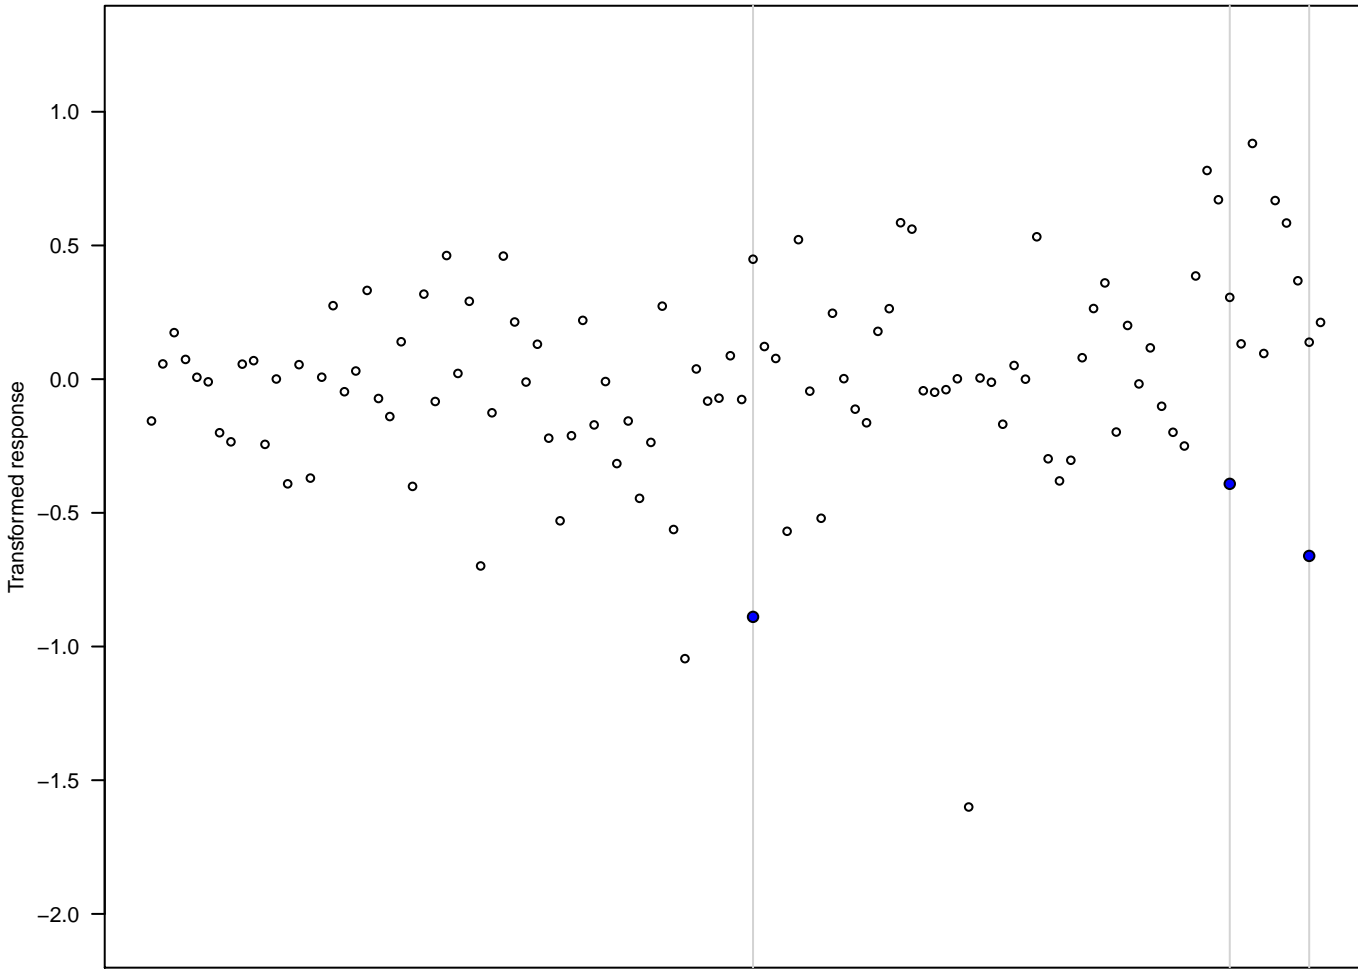

MRC Harwell

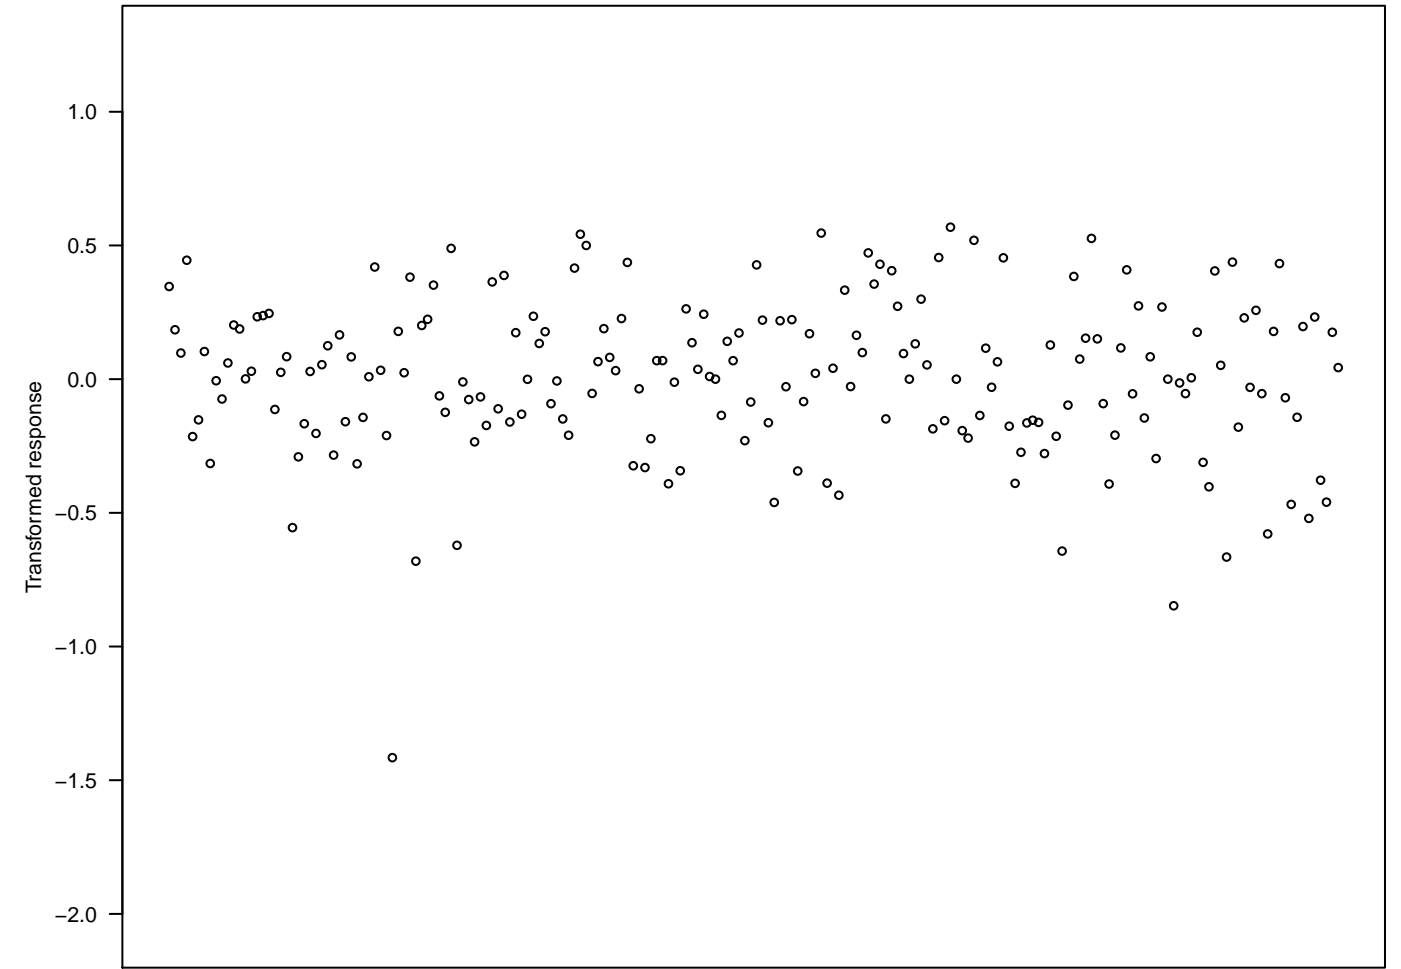

WTSI

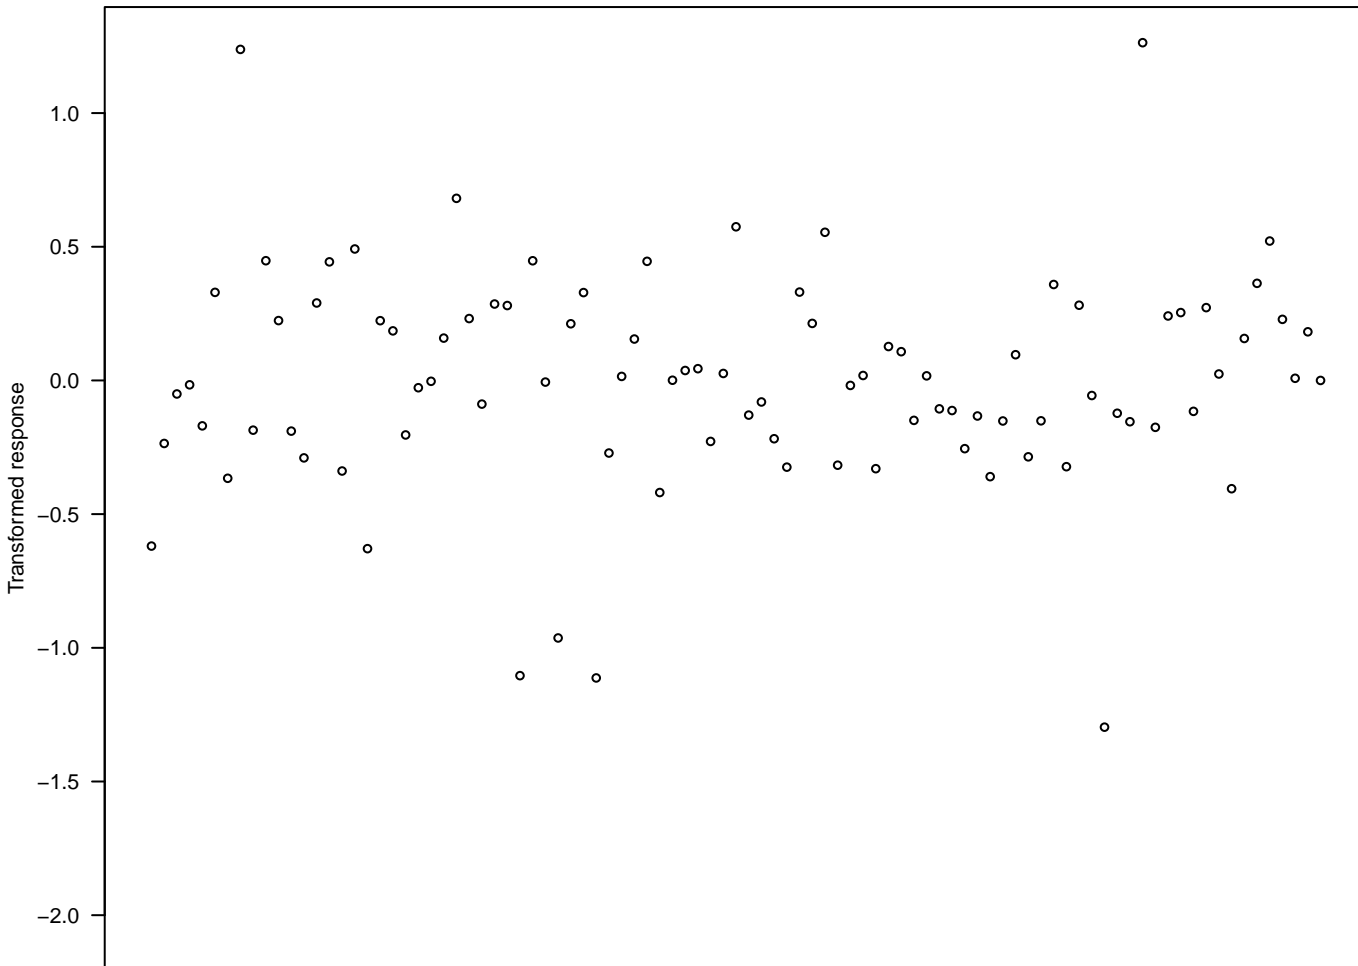

ICS

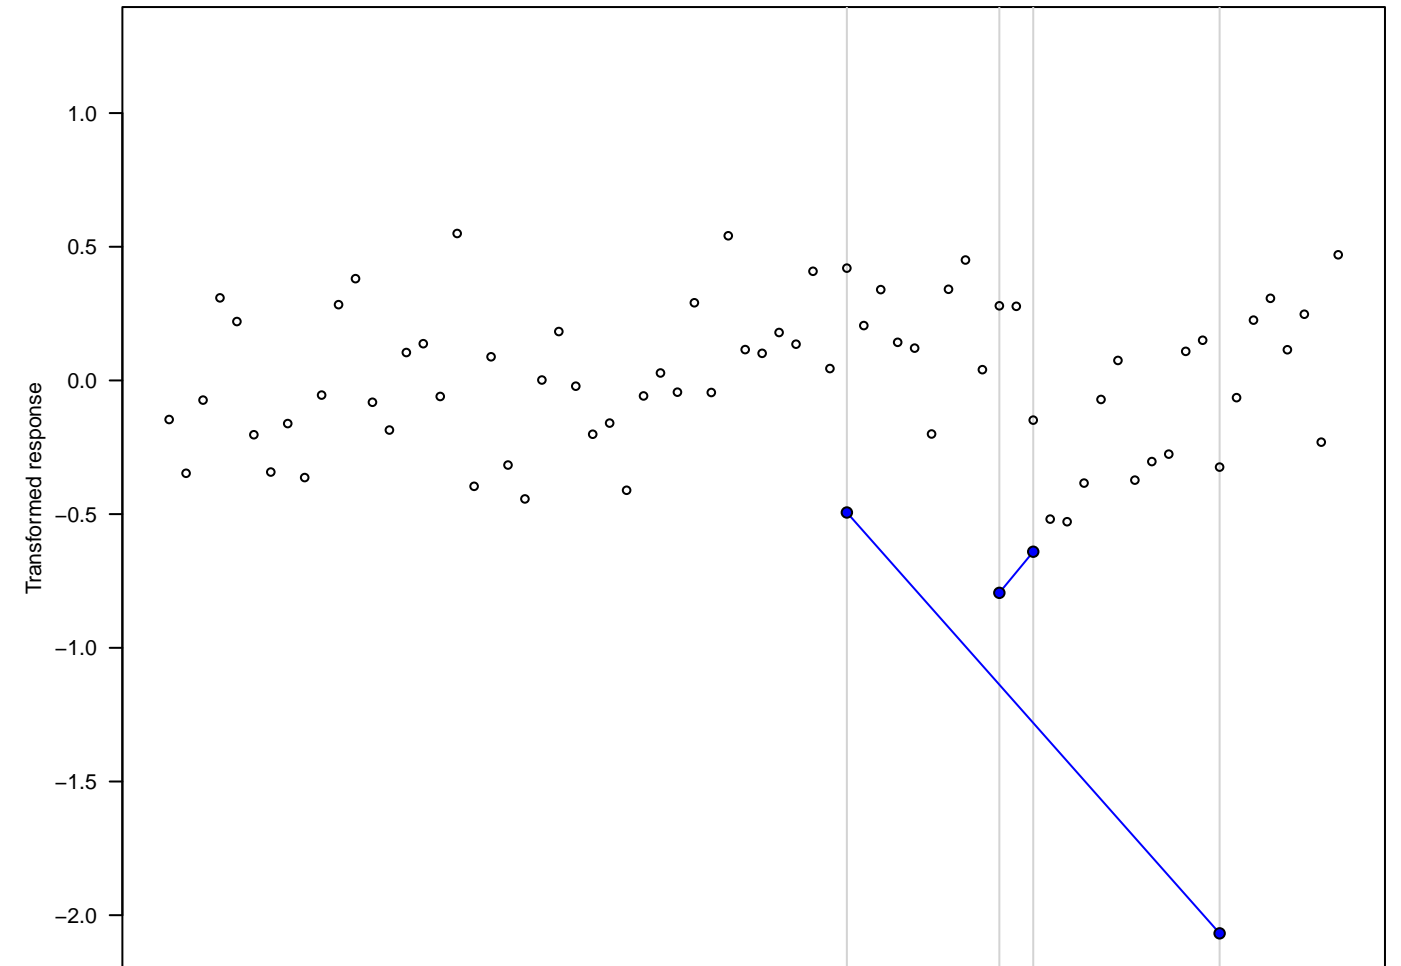



Prepulse inhibition – PP2  
(Acoustic Startle&PPI)

HMGU

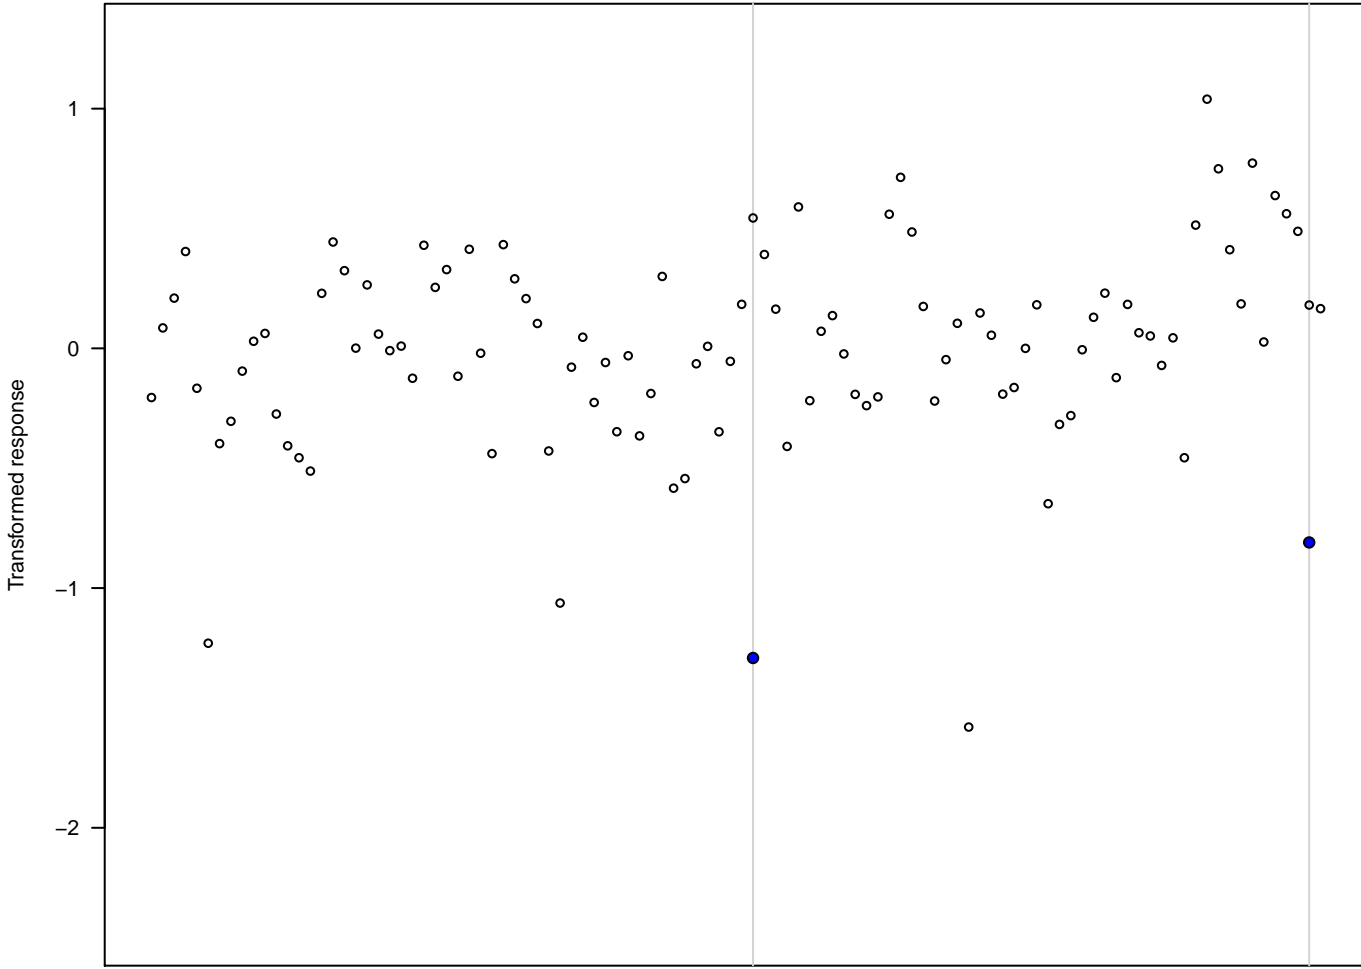

MRC Harwell

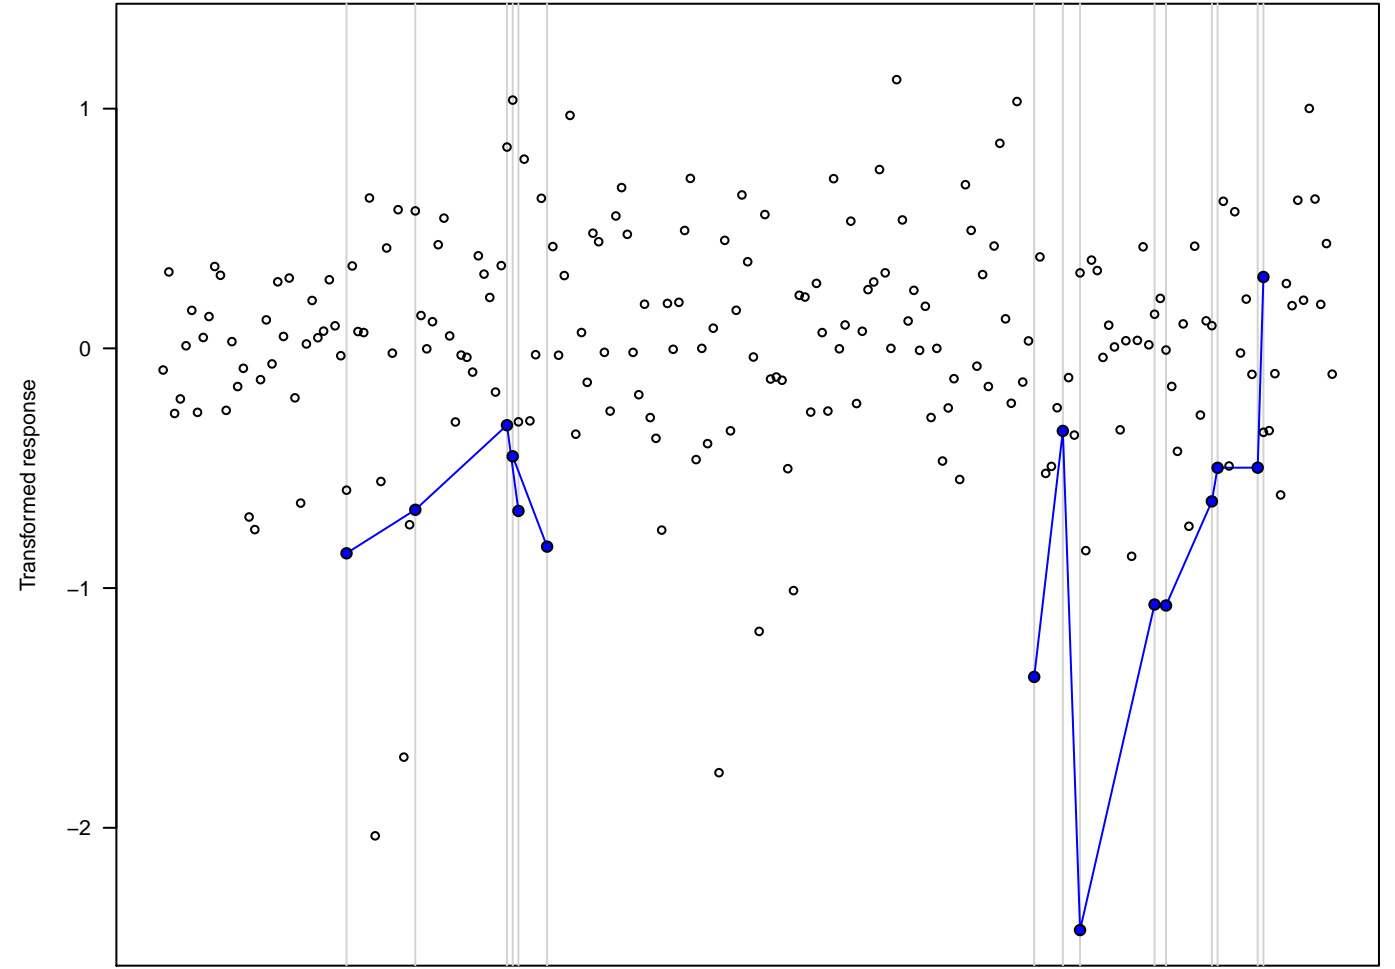

WTSI

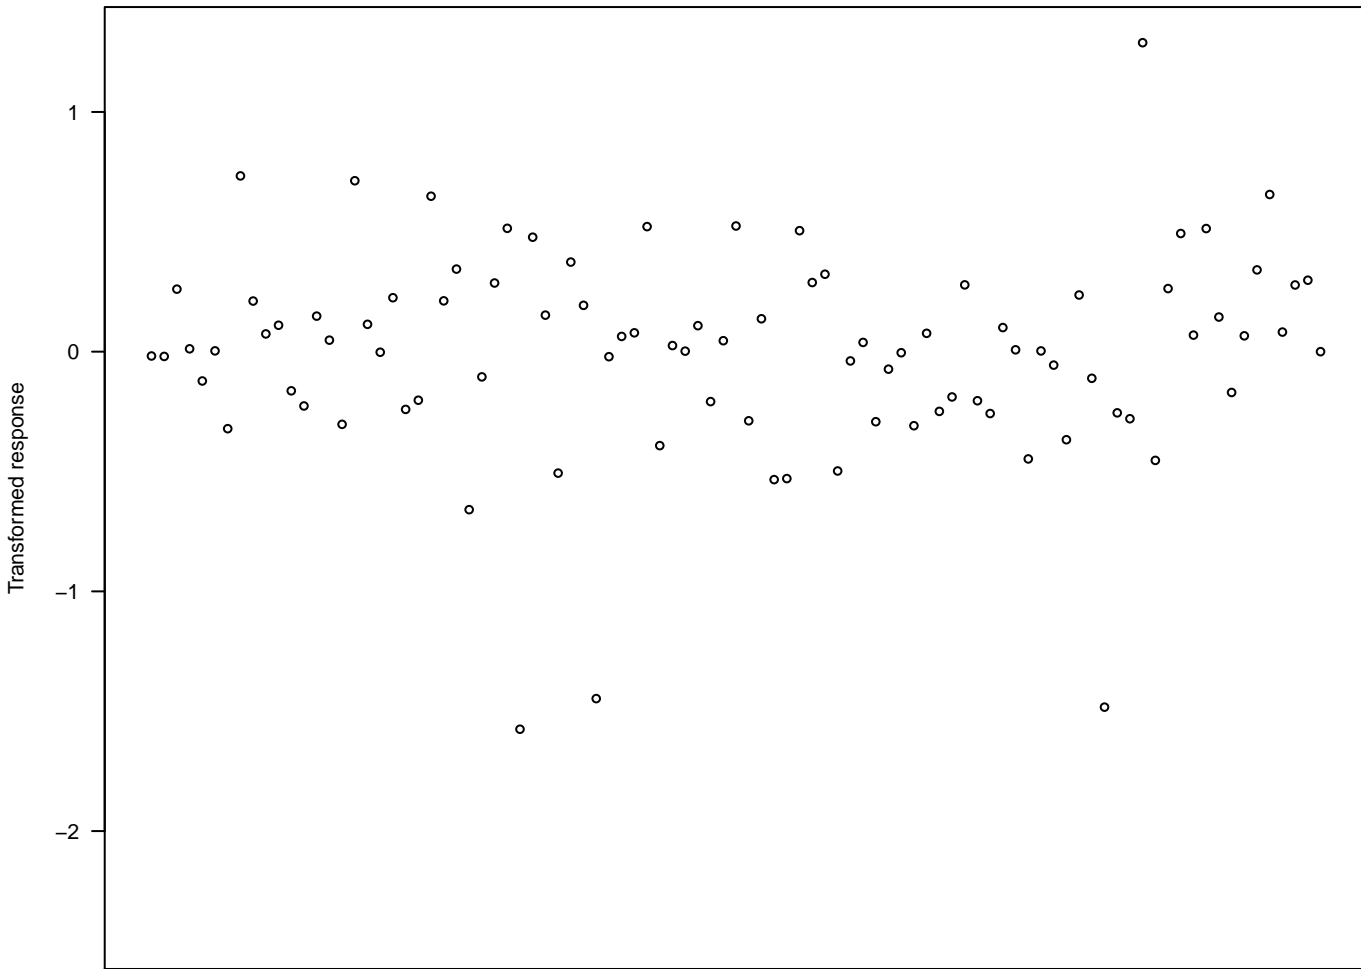

ICS

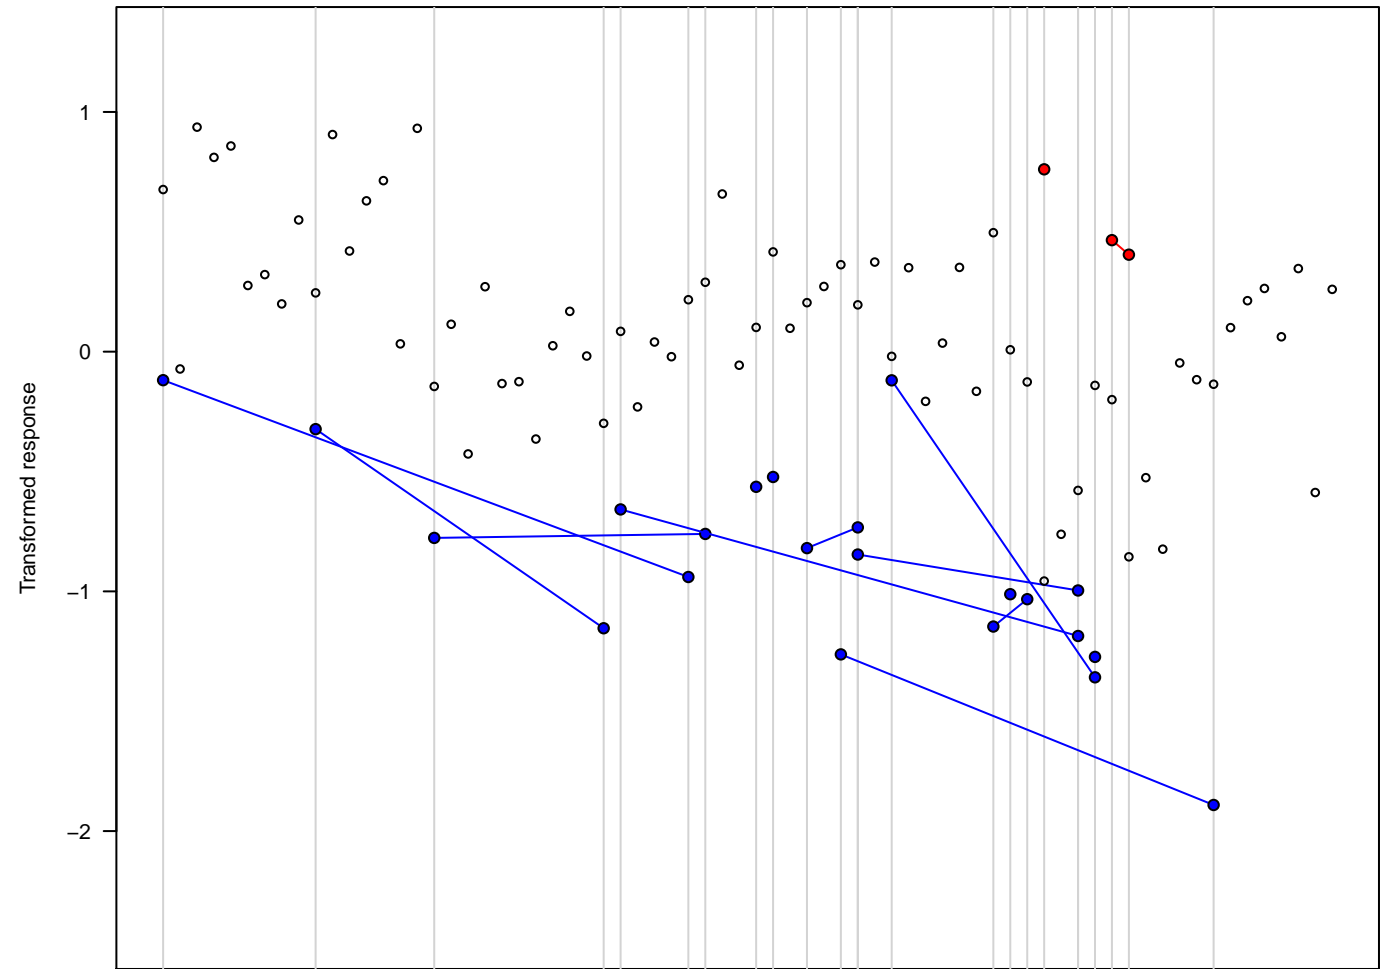

Prepulse inhibition – PP3  
(Acoustic Startle&PPI)

HMGU

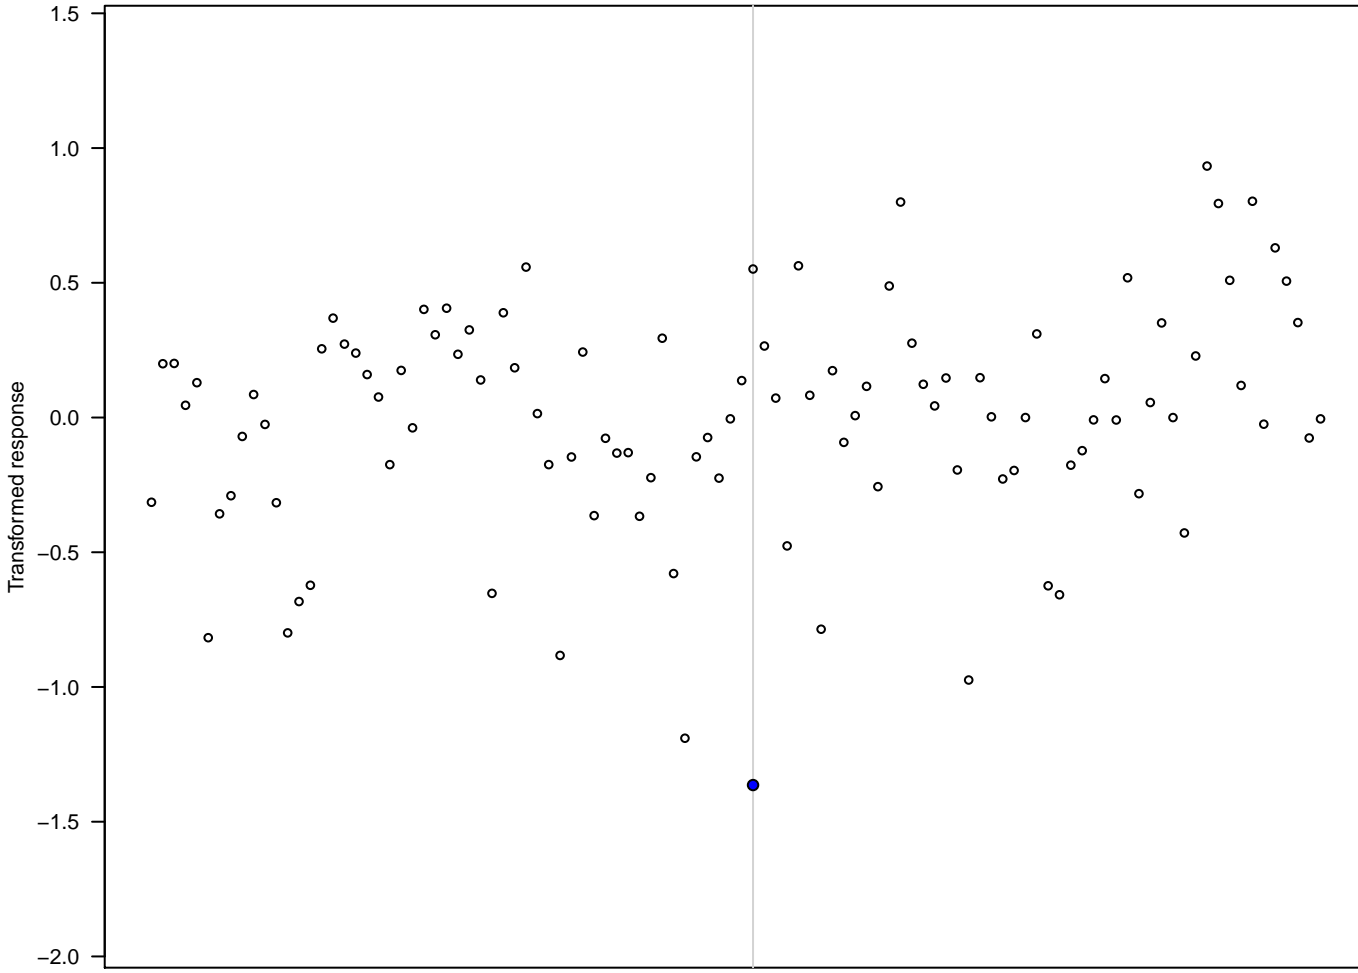

MRC Harwell

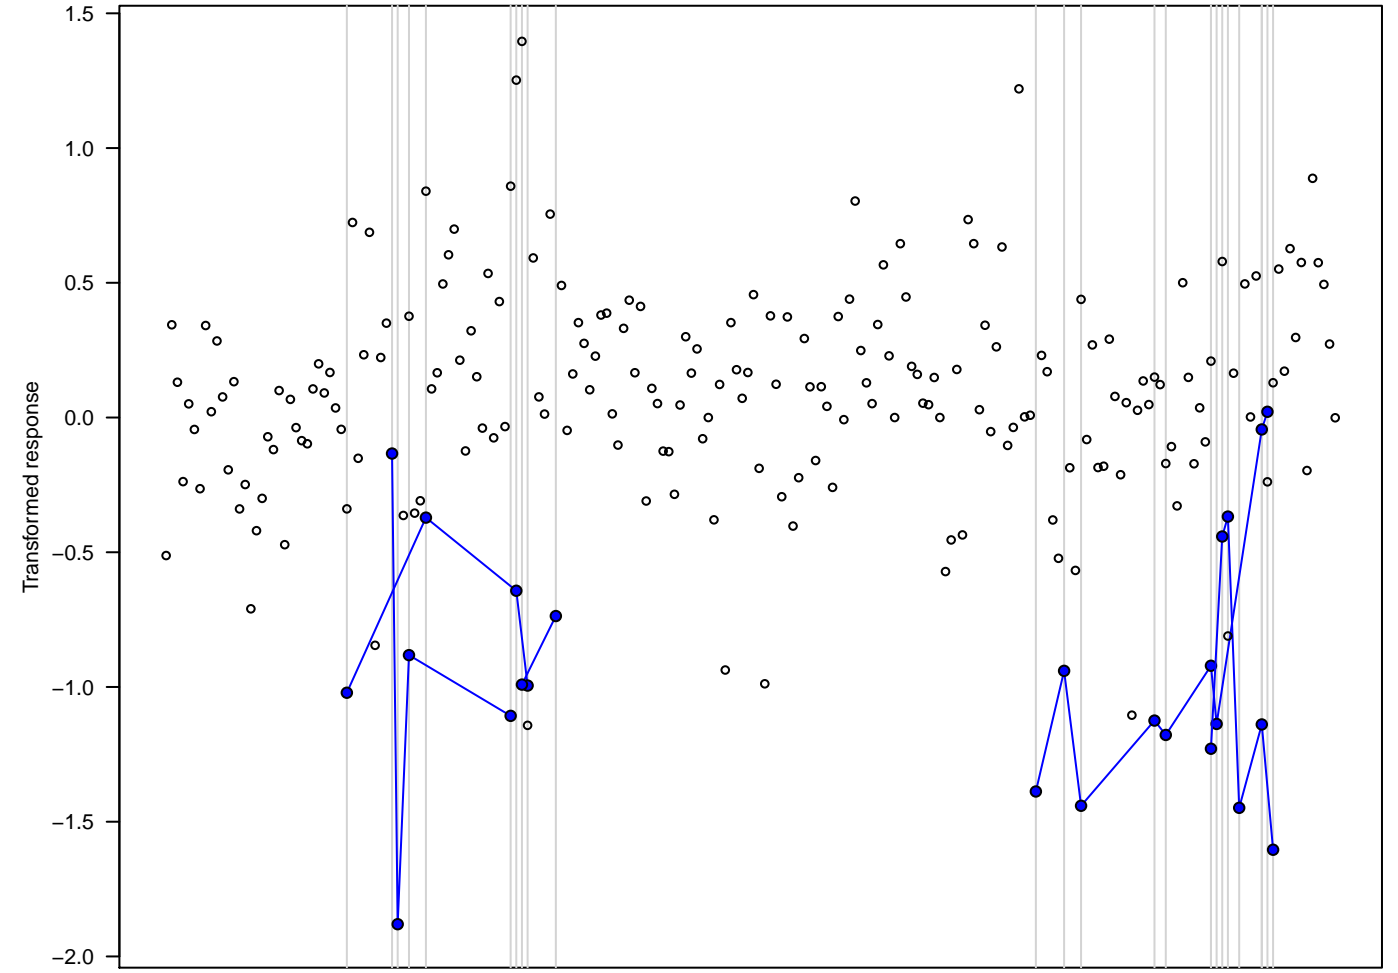

WTSI

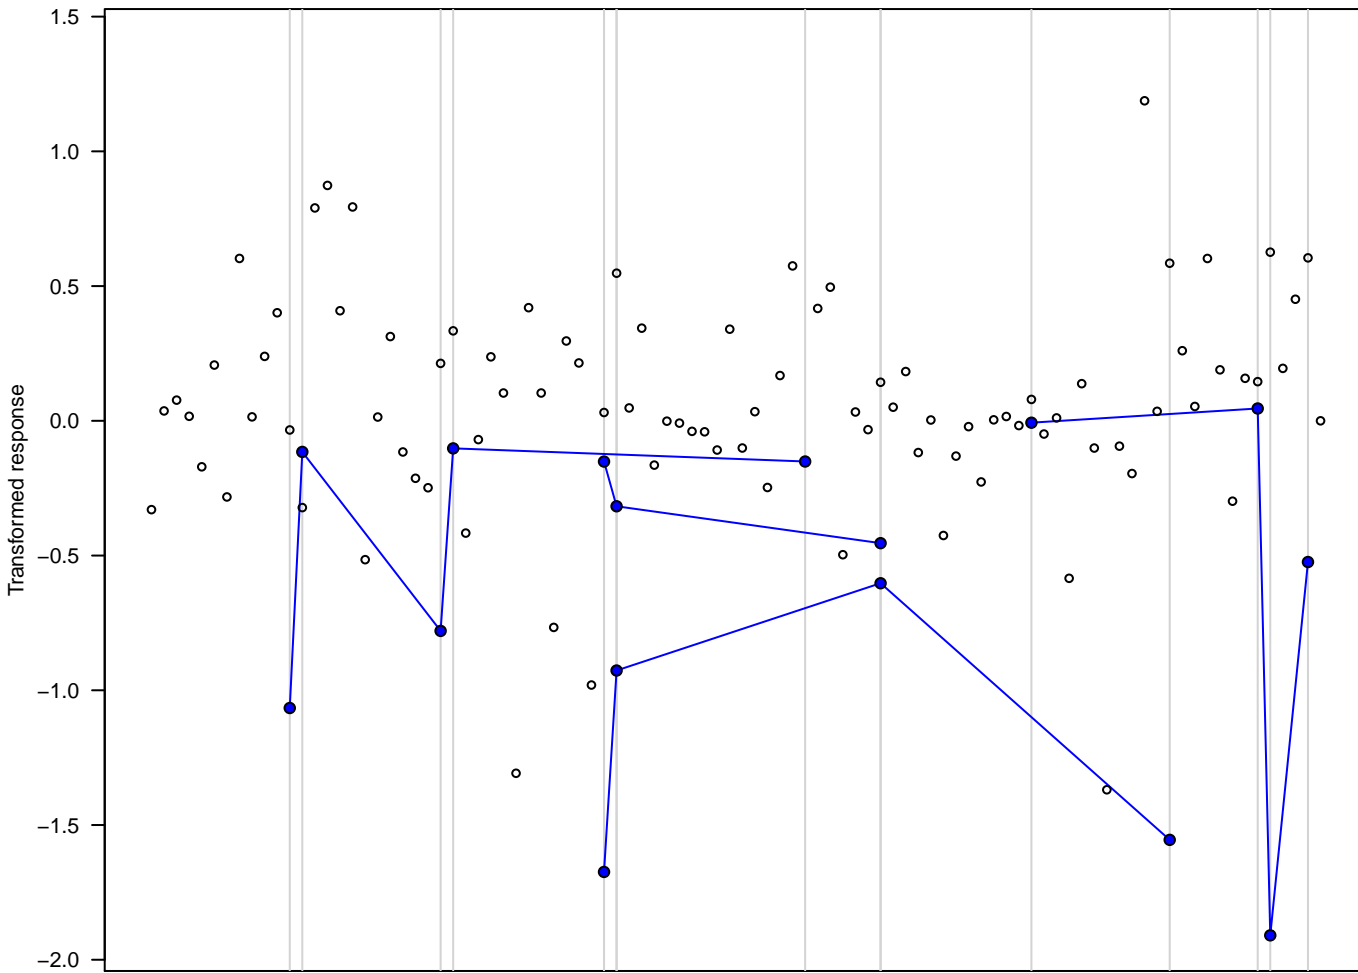

ICS

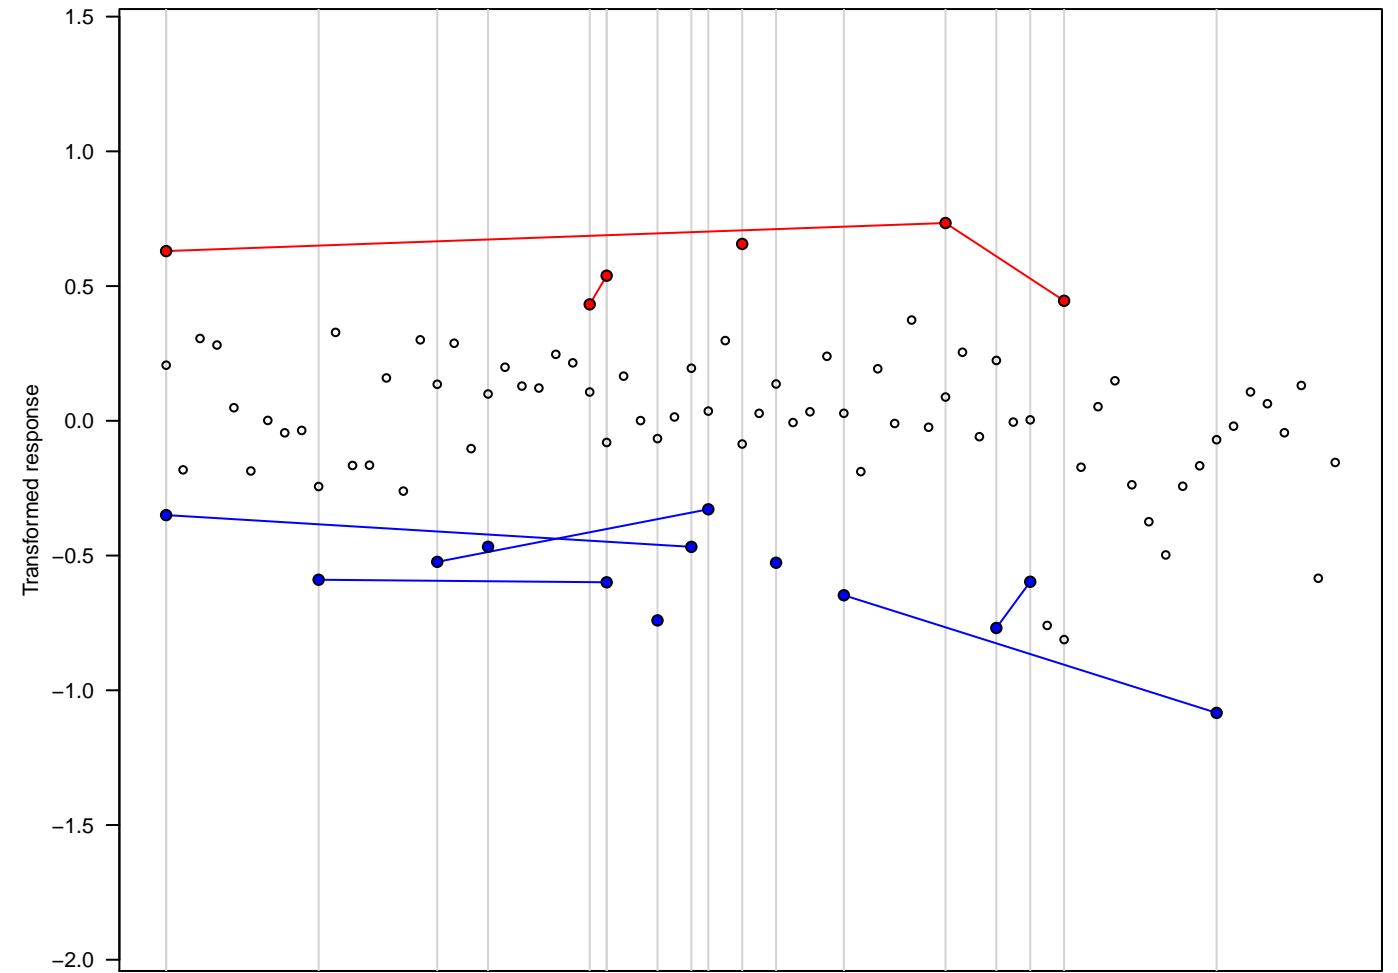

Prepulse inhibition – PP4  
(Acoustic Startle&PPI)

HMGU

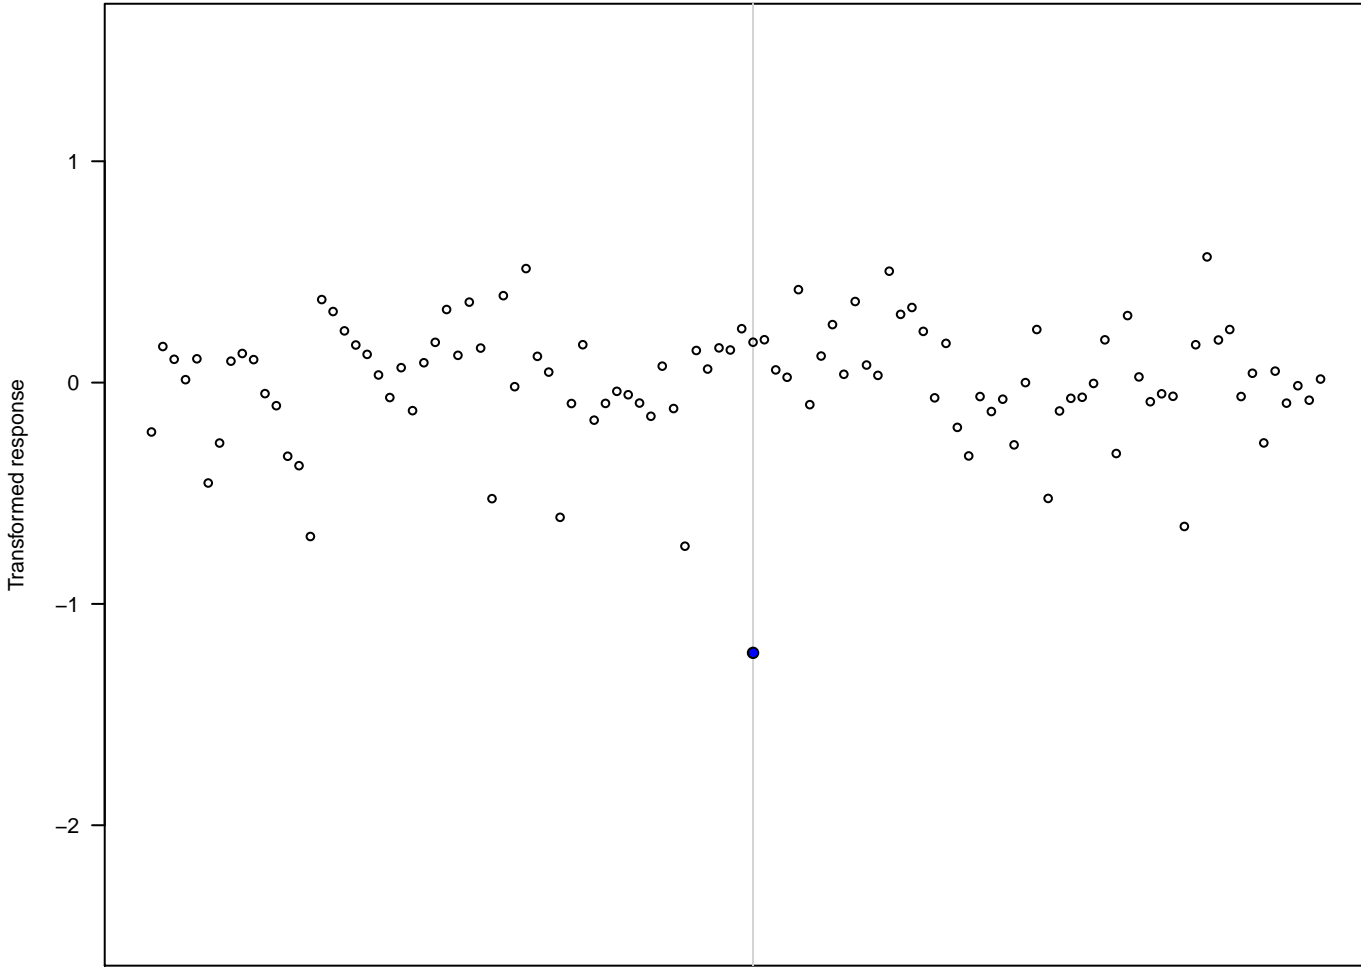

MRC Harwell

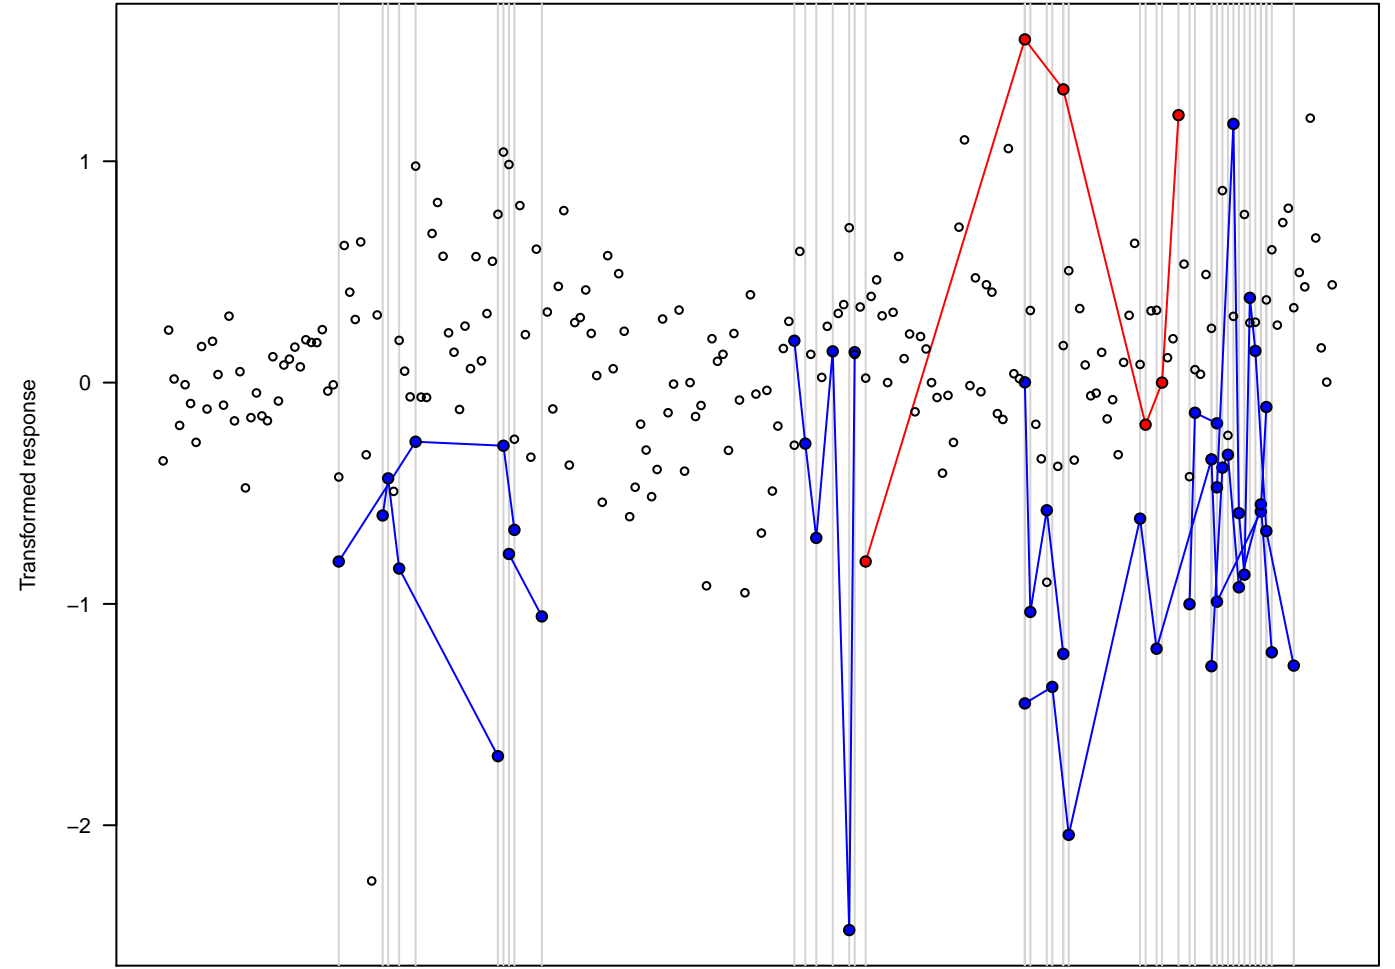

WTSI

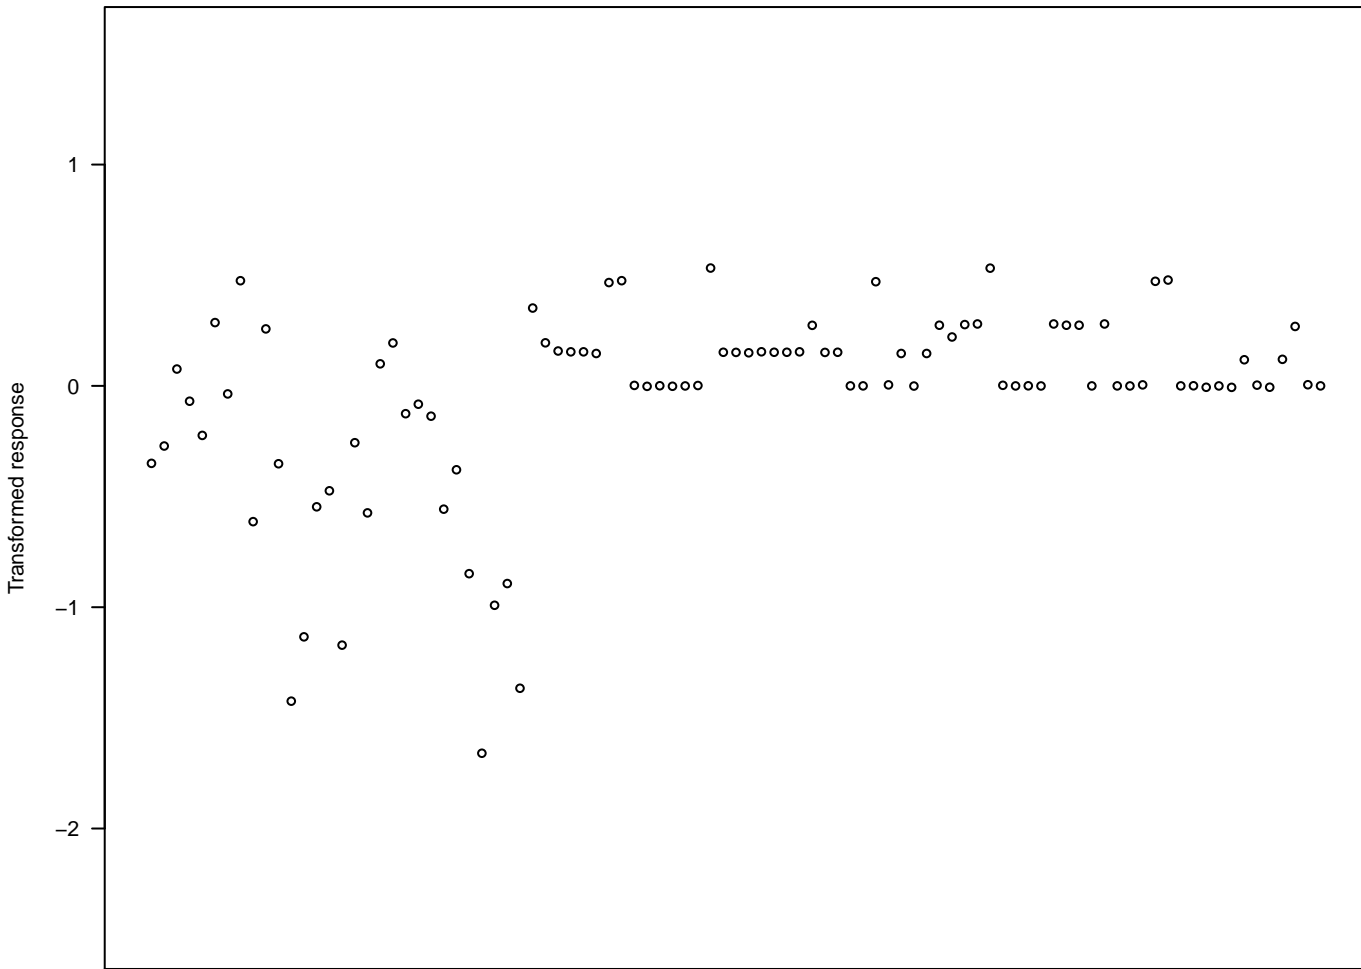

ICS

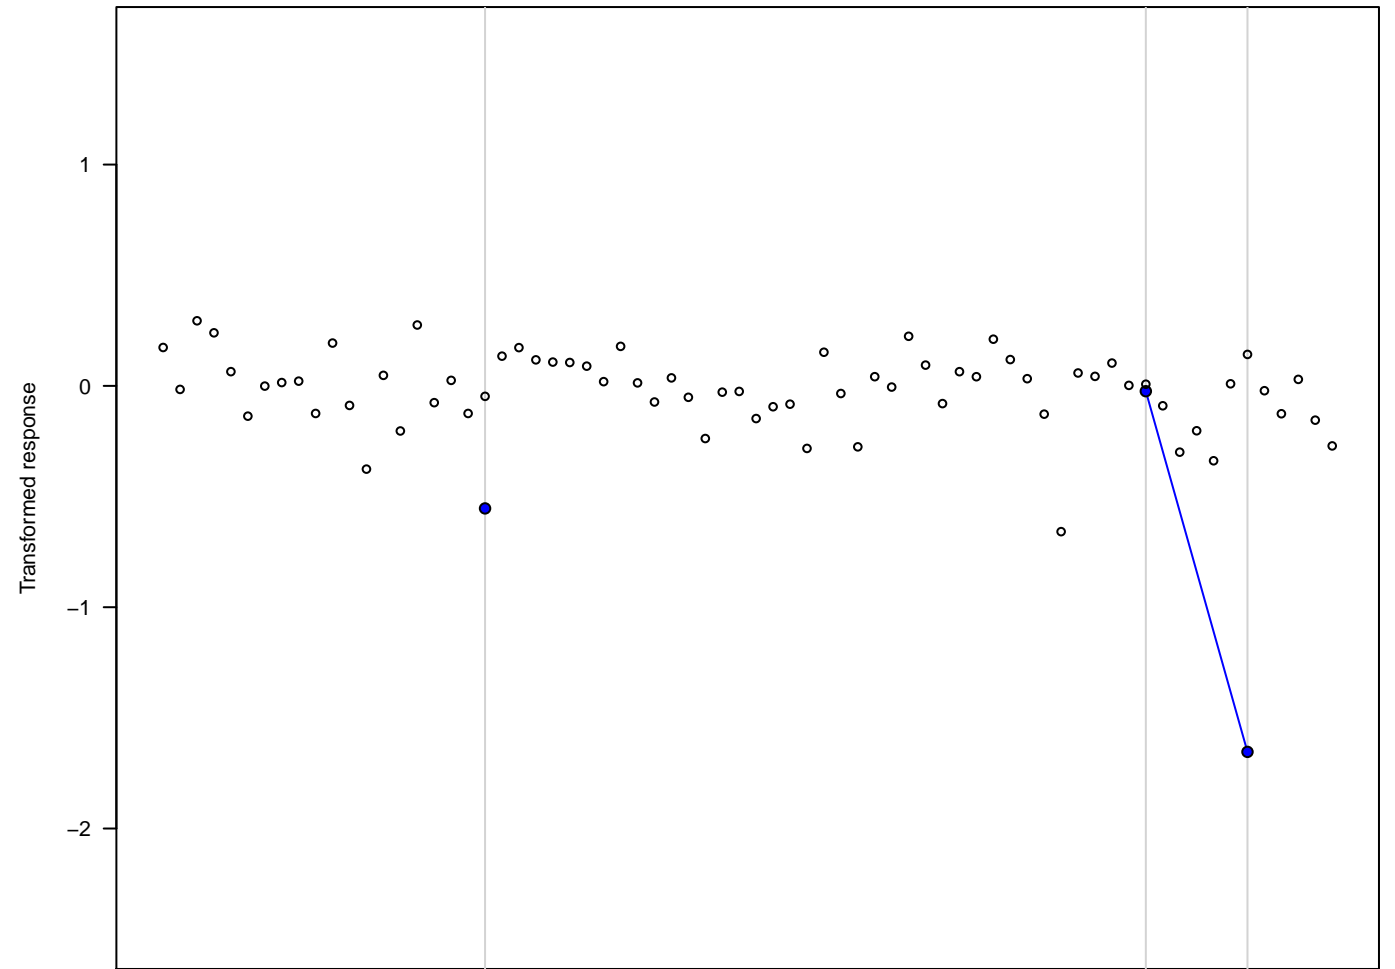

Global prepulse inhibition  
(Acoustic Startle&PPI)

HMGU

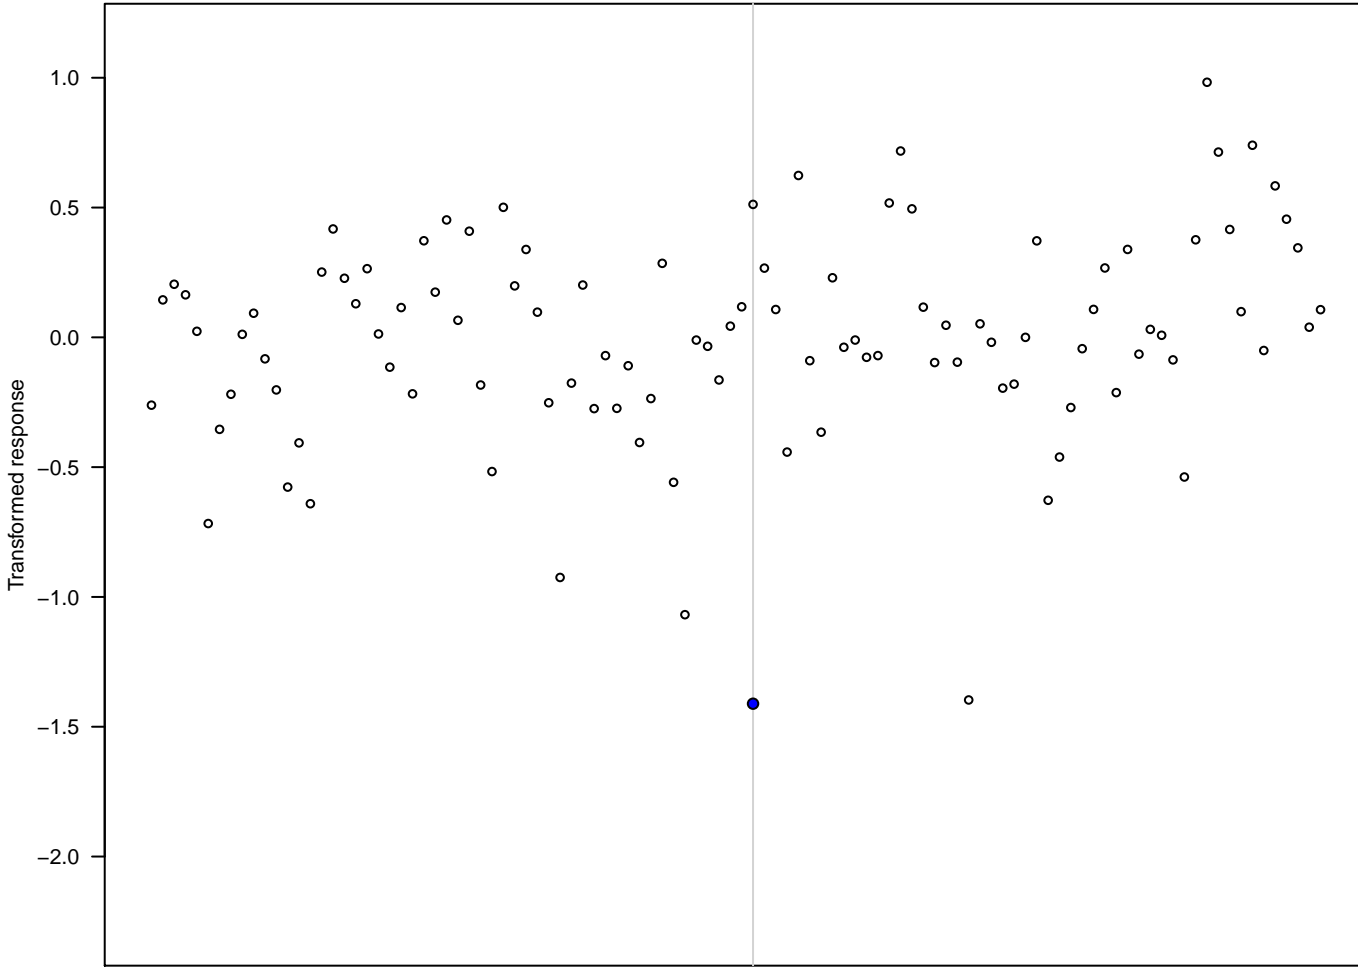

MRC Harwell

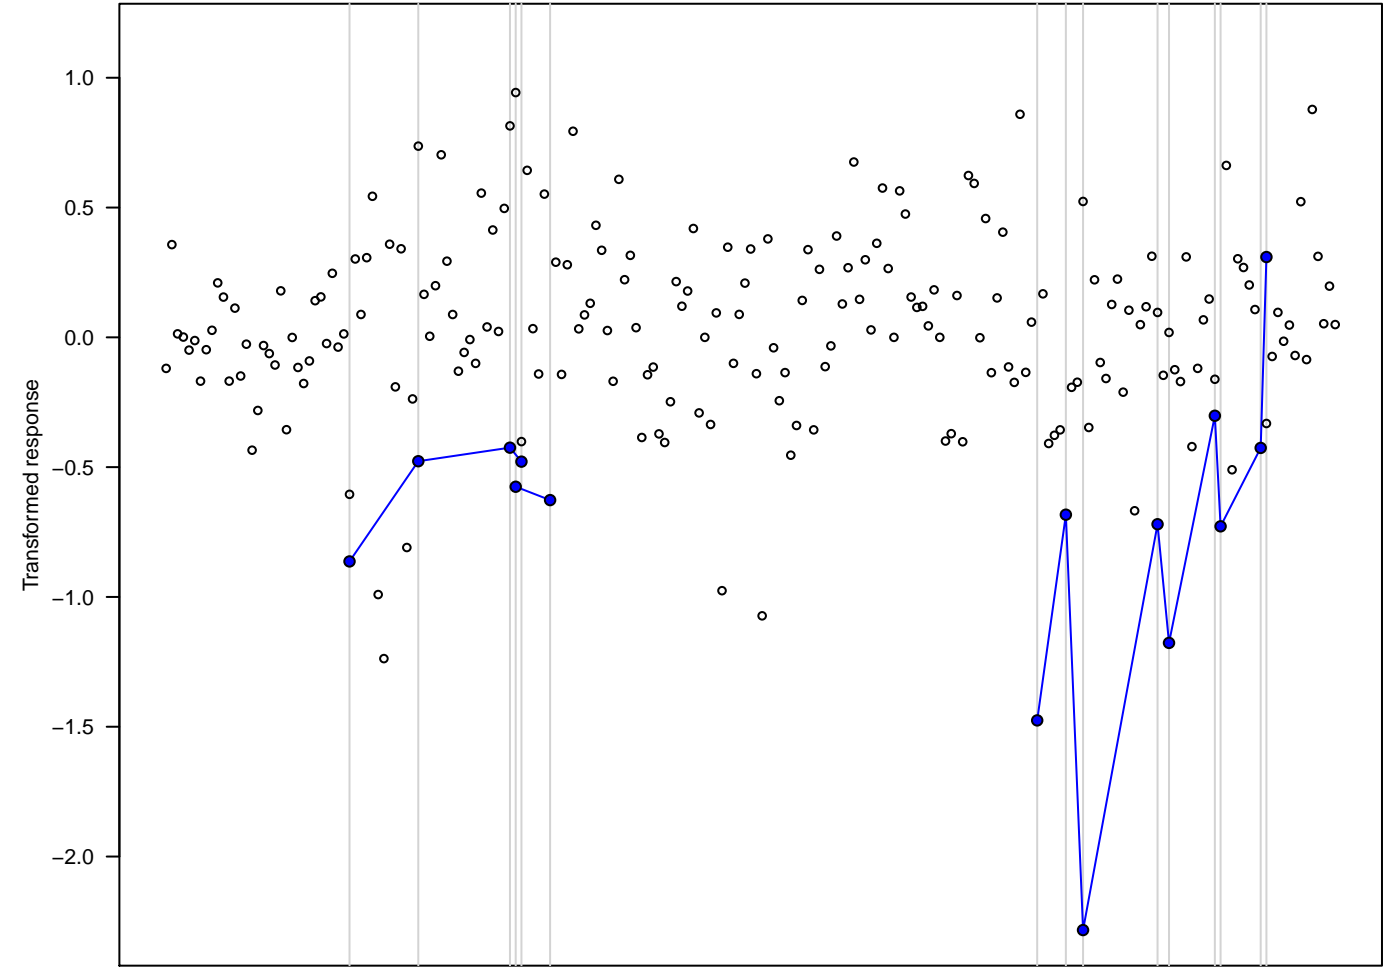

WTSI

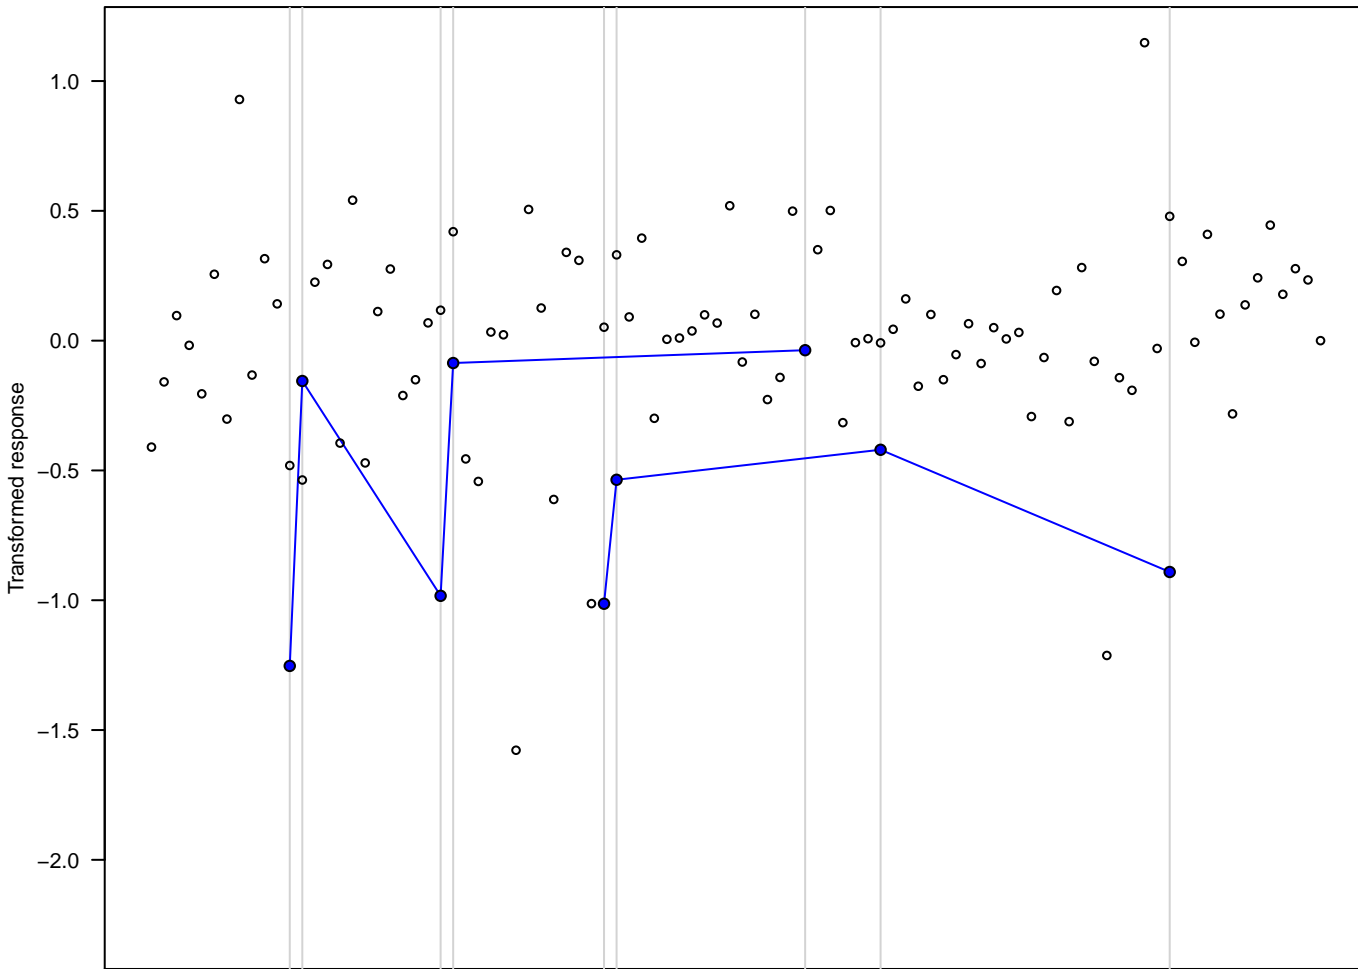

ICS

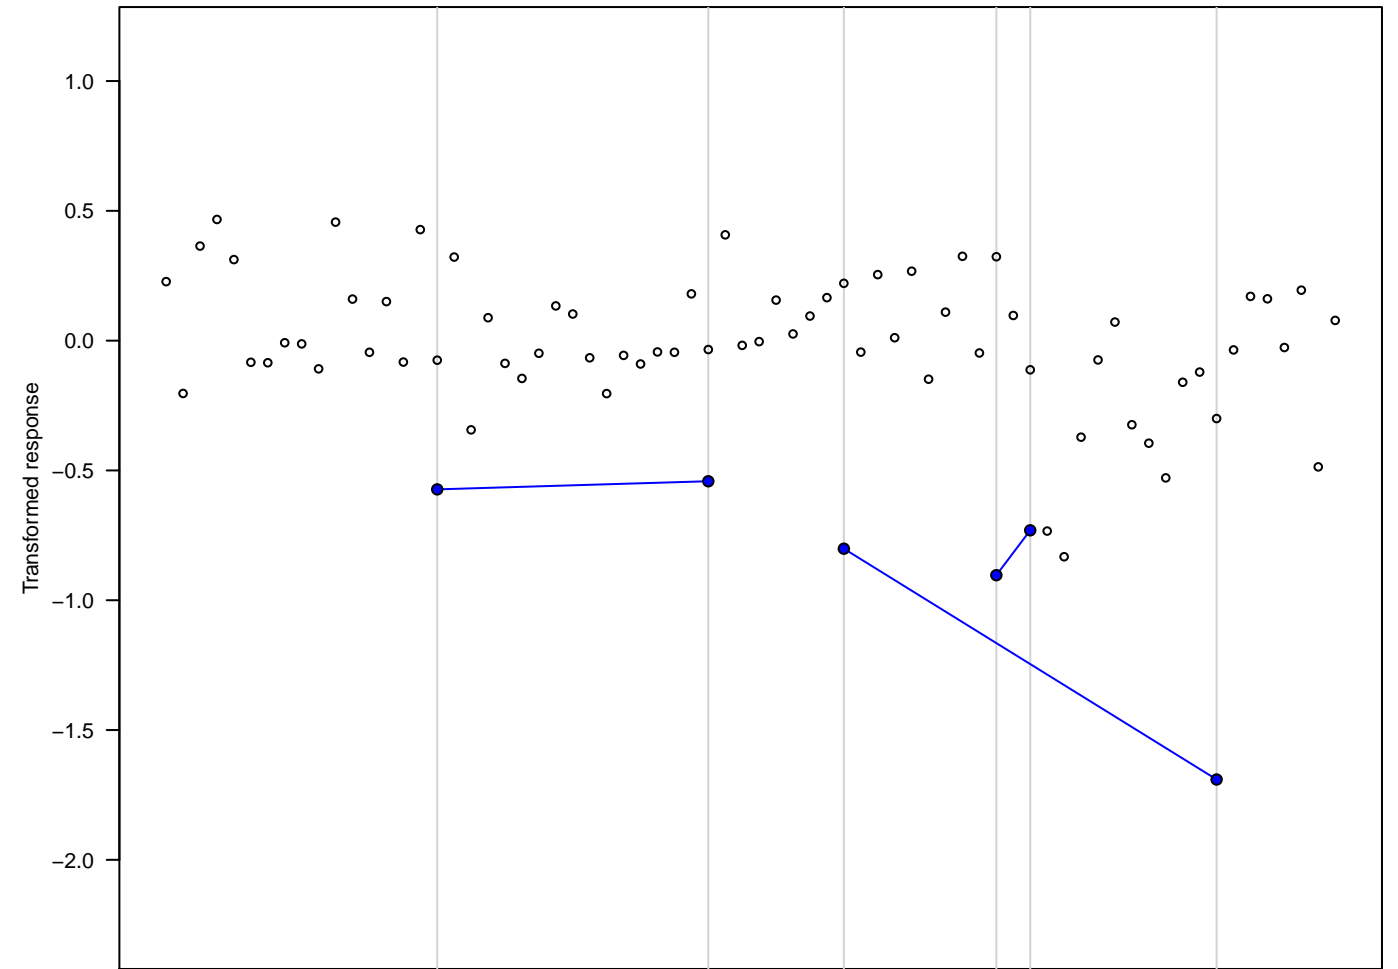

Time of first response  
(Hot Plate)

HMGU

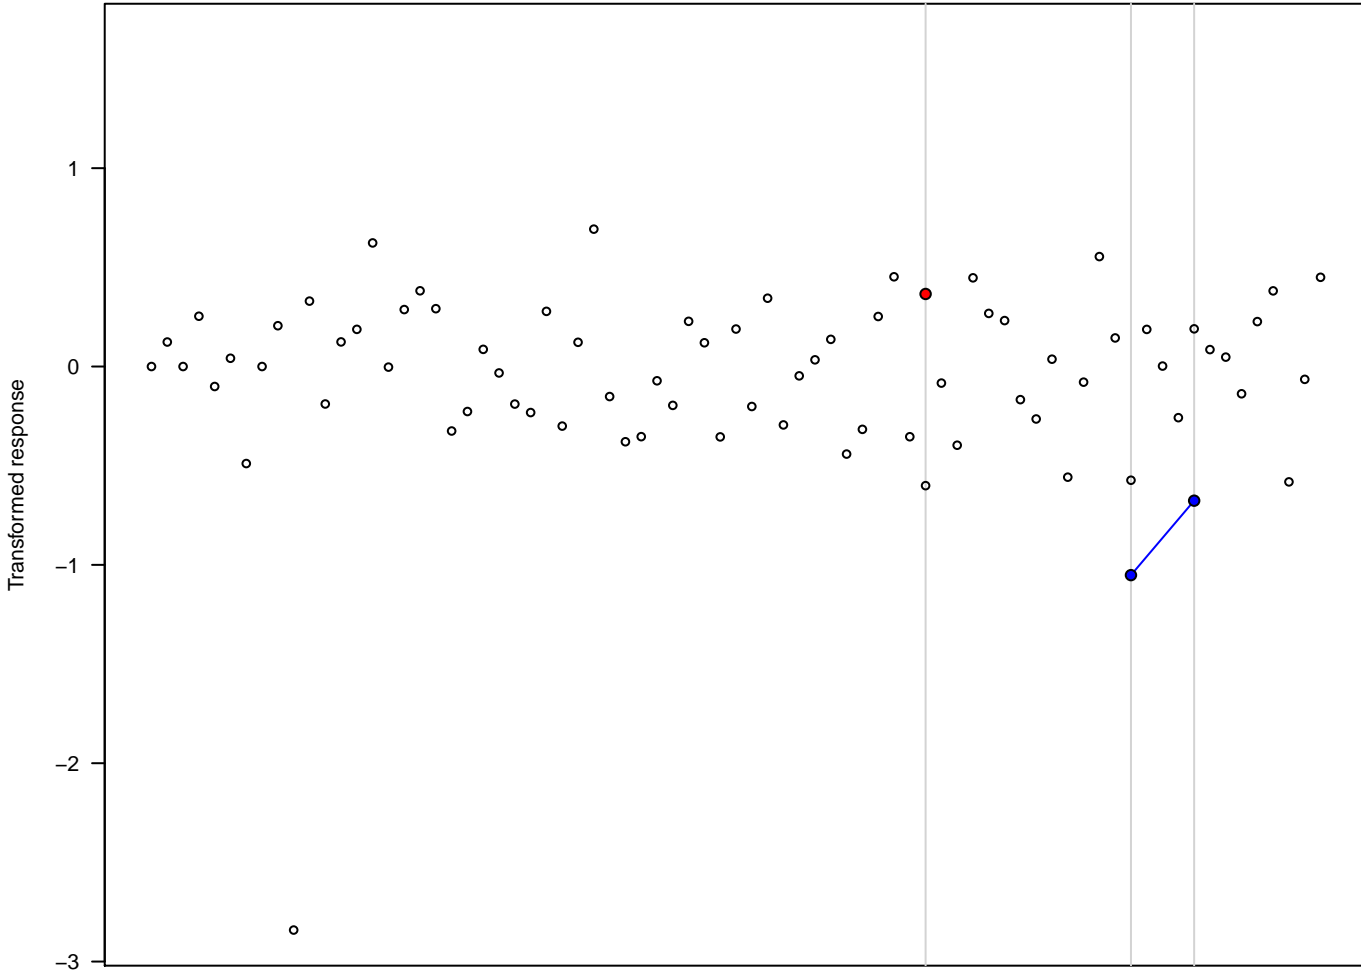

MRC Harwell

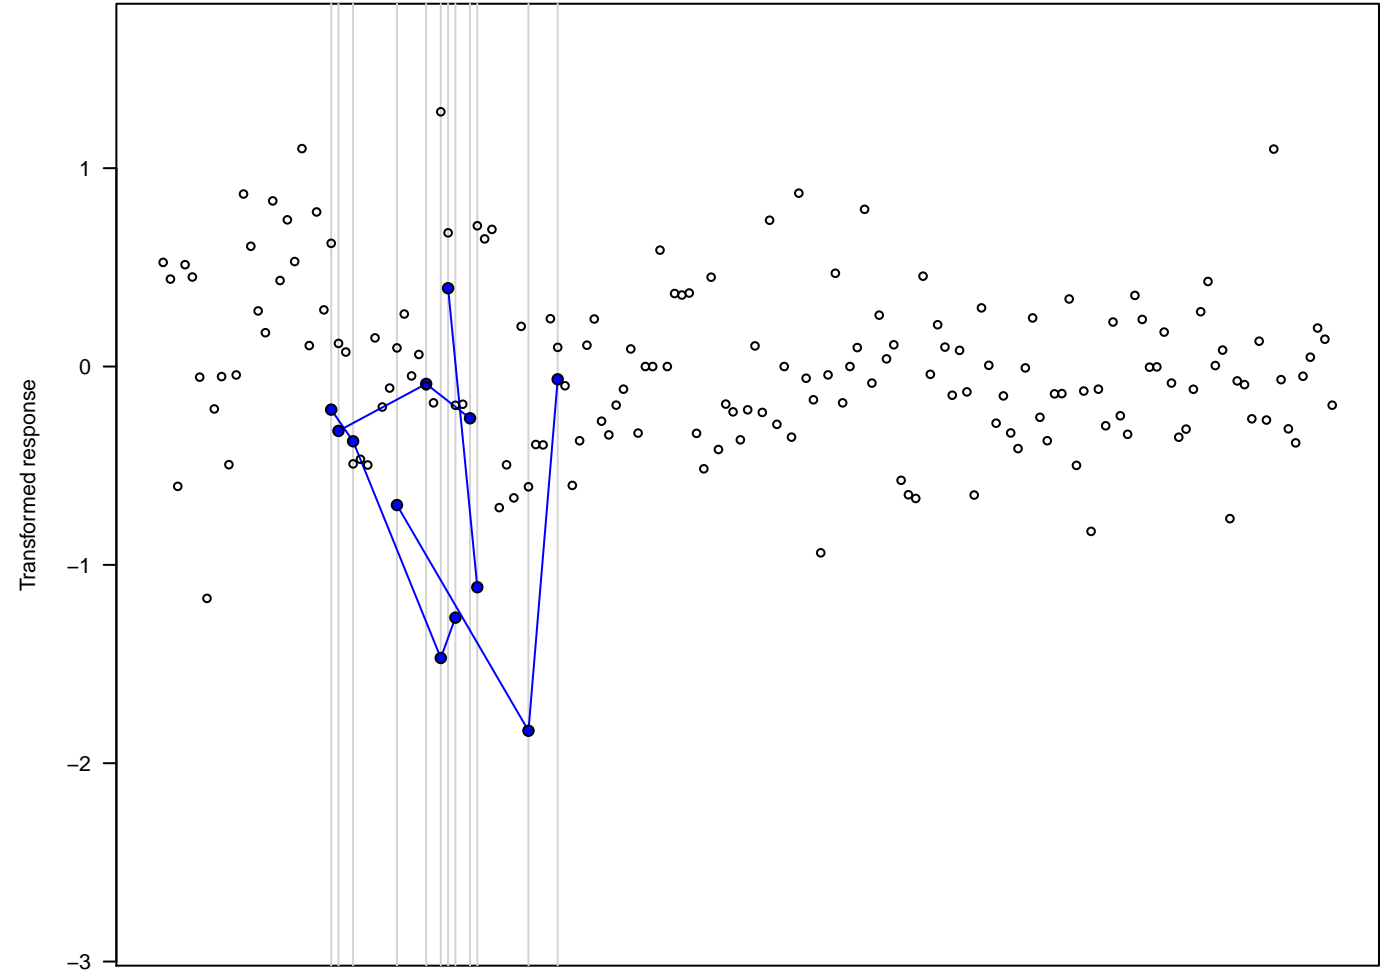

WTSI

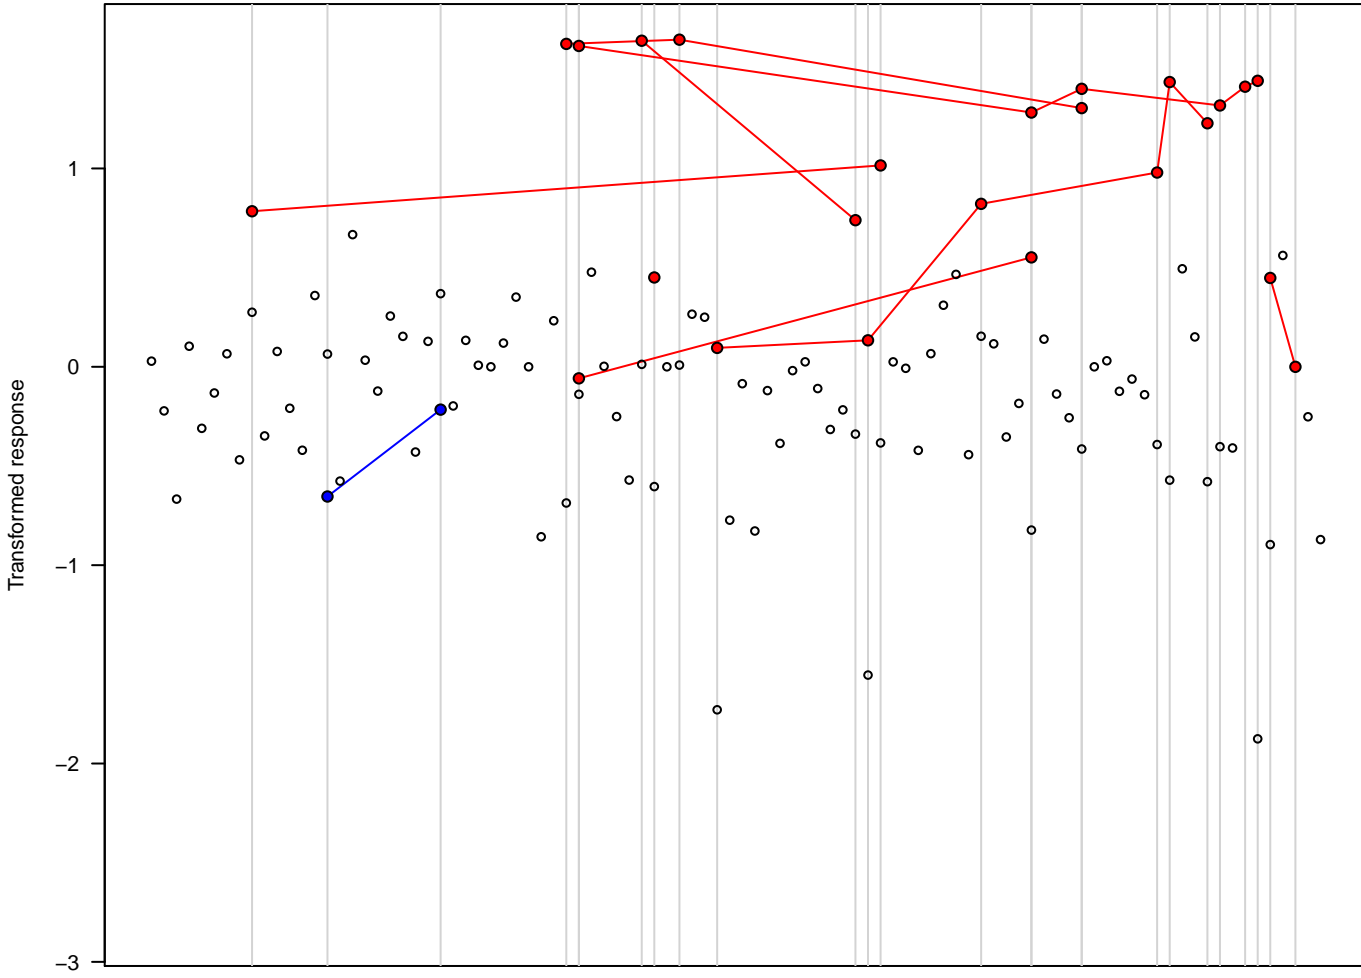

ICS

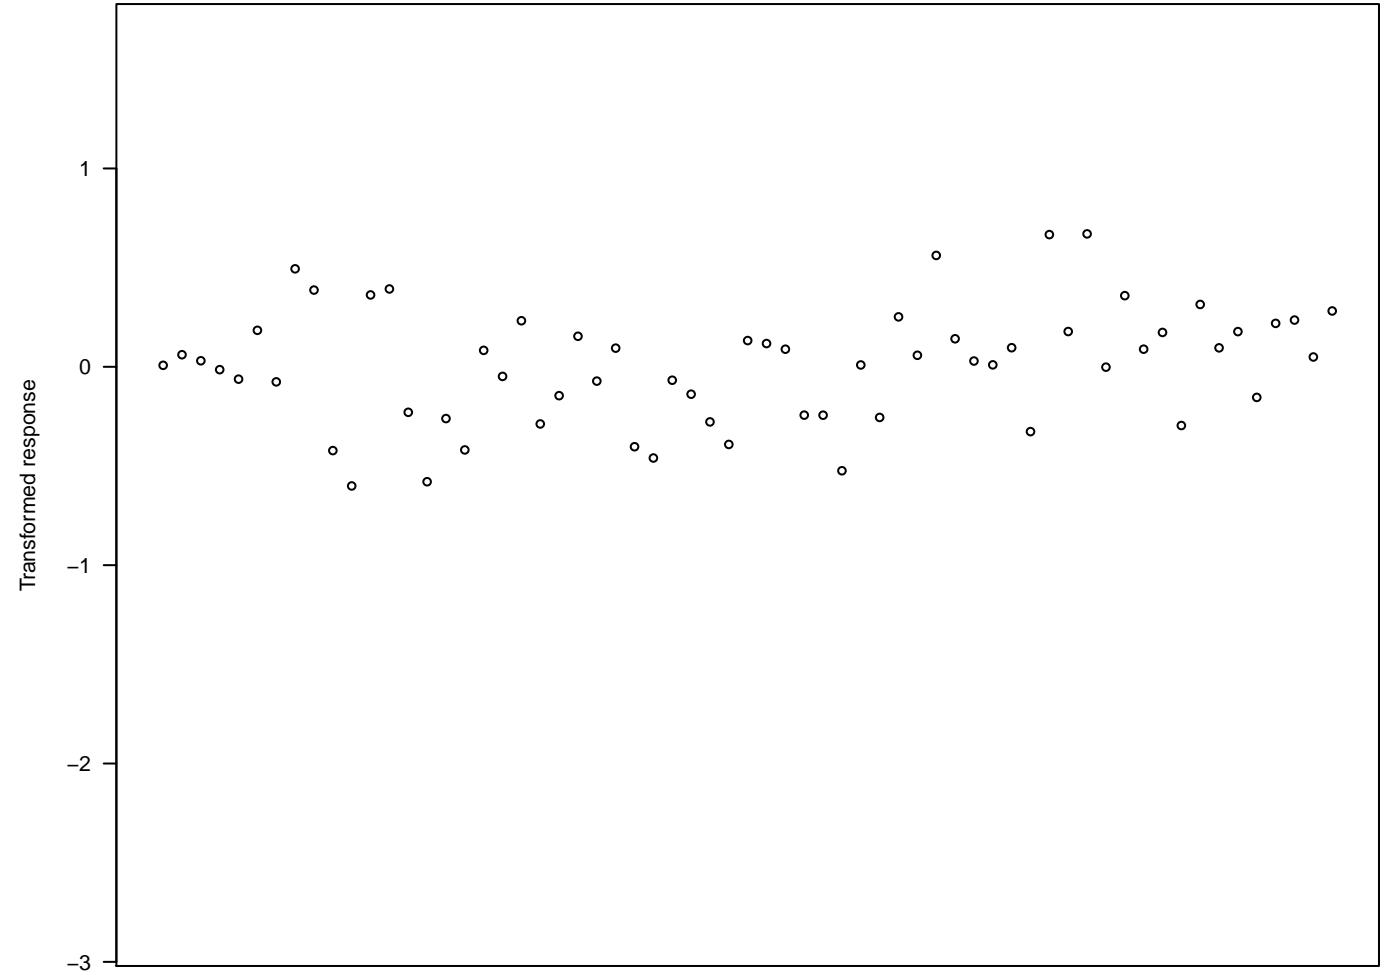

Glucose  
(Clinical Chemistry)

HMGU

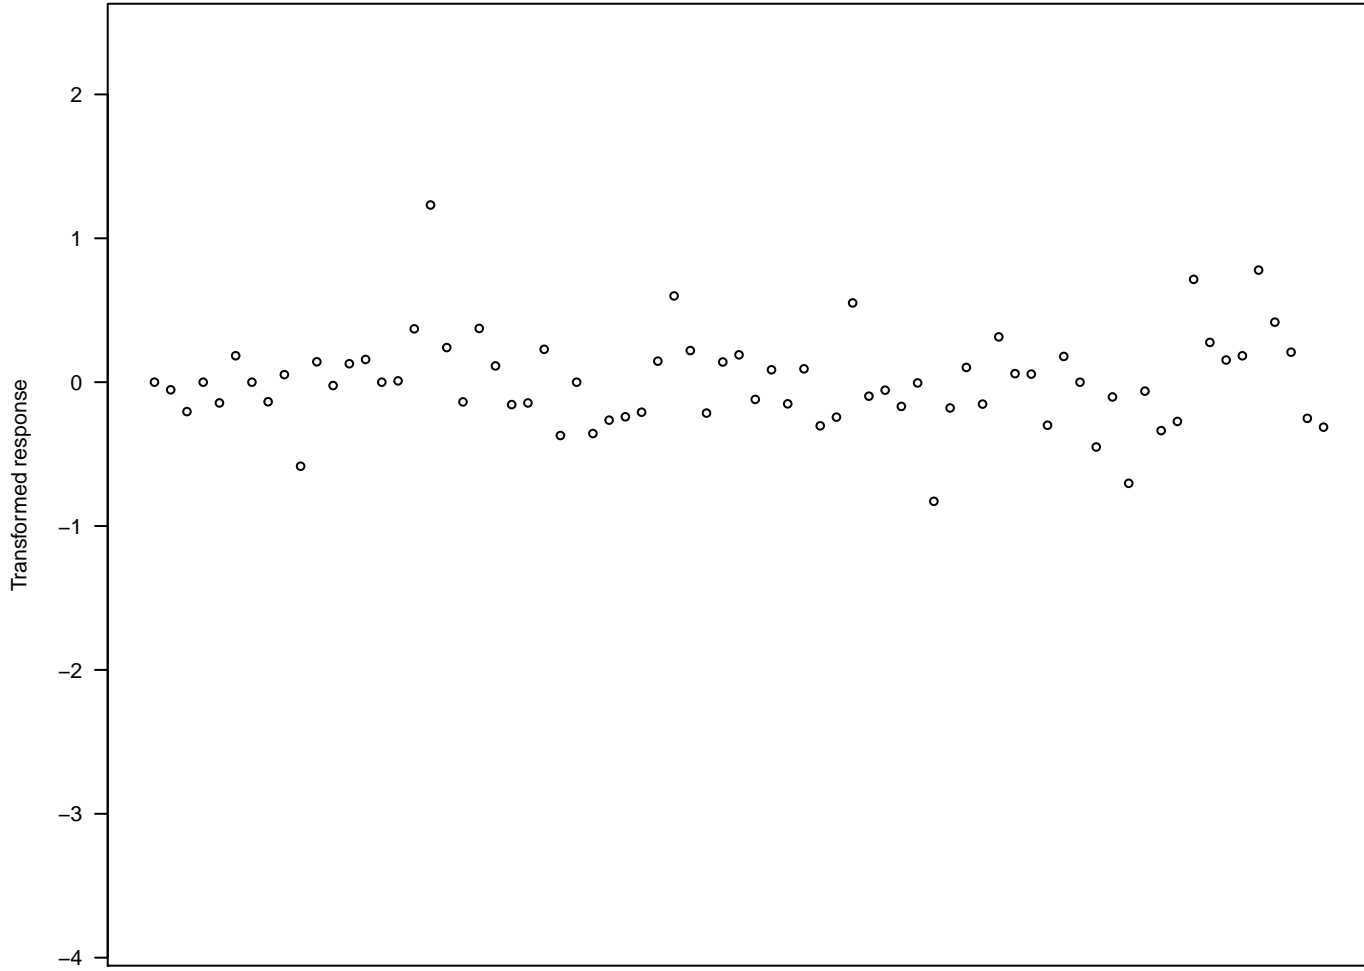

MRC Harwell

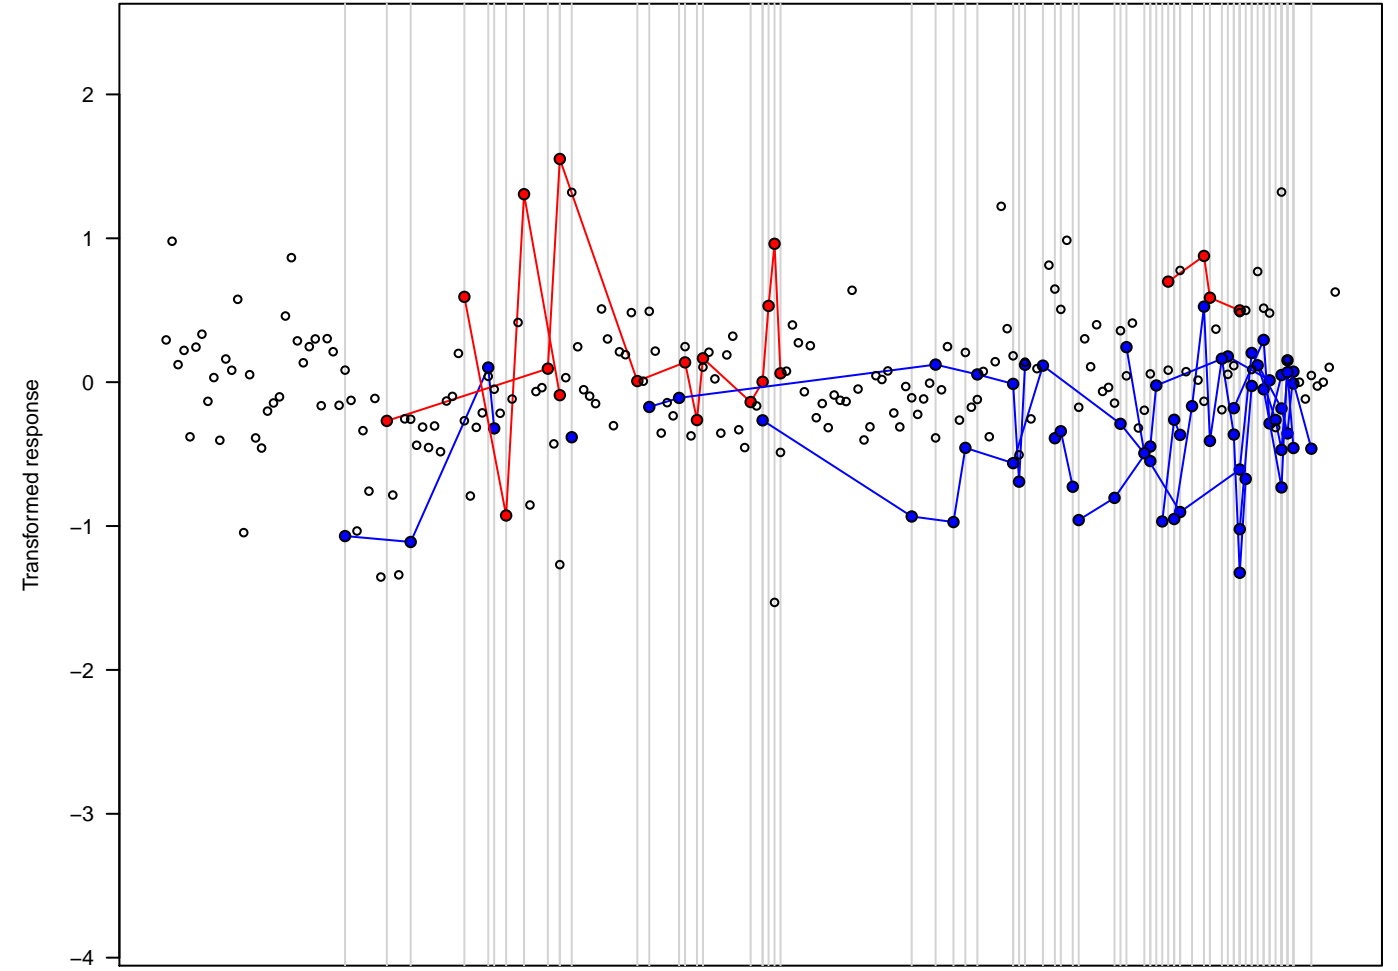

WTSI

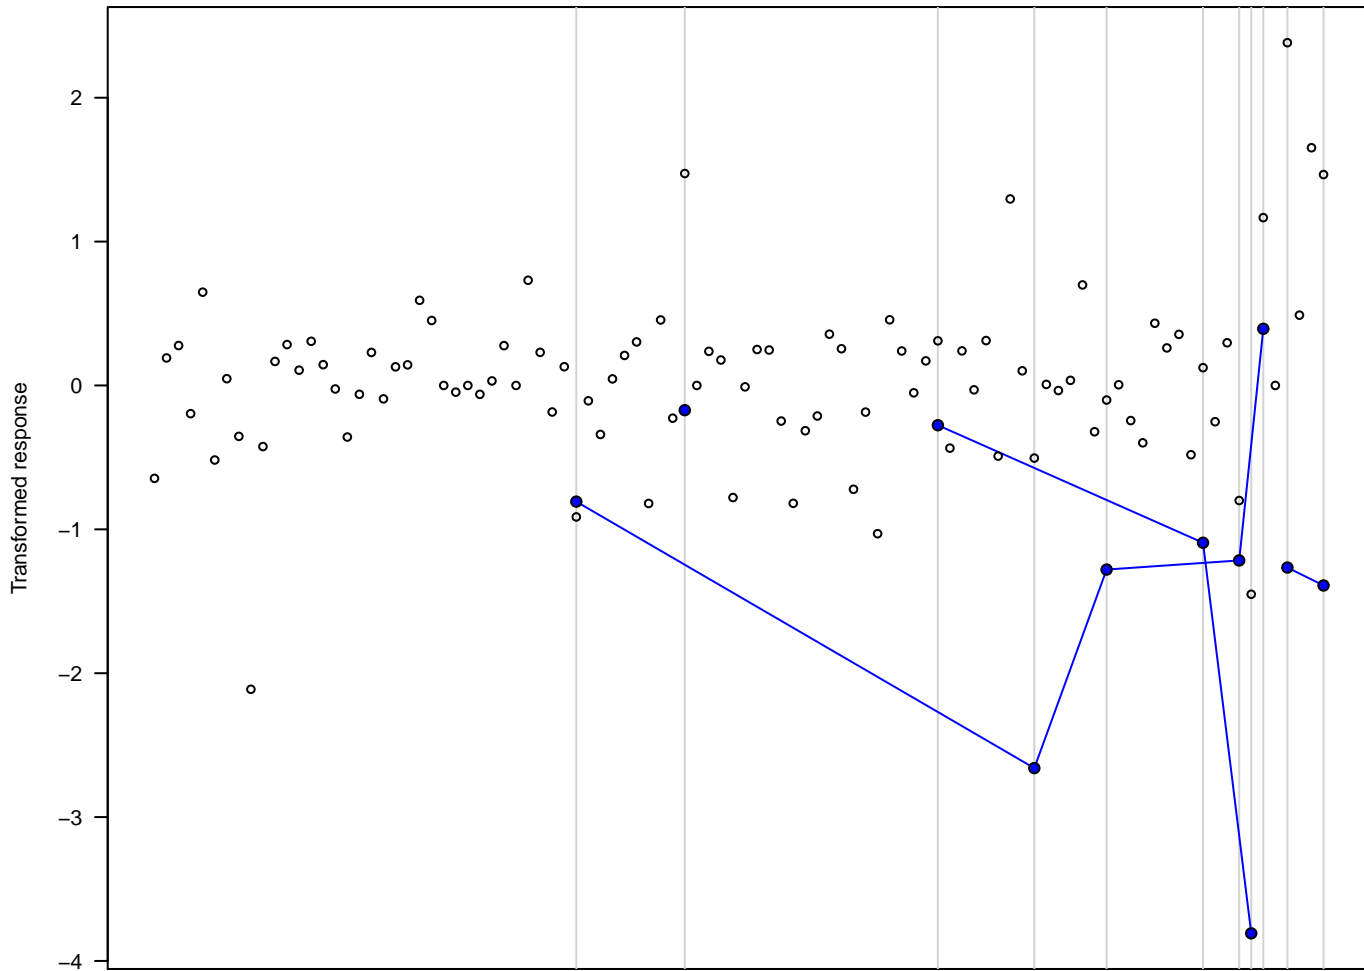

ICS

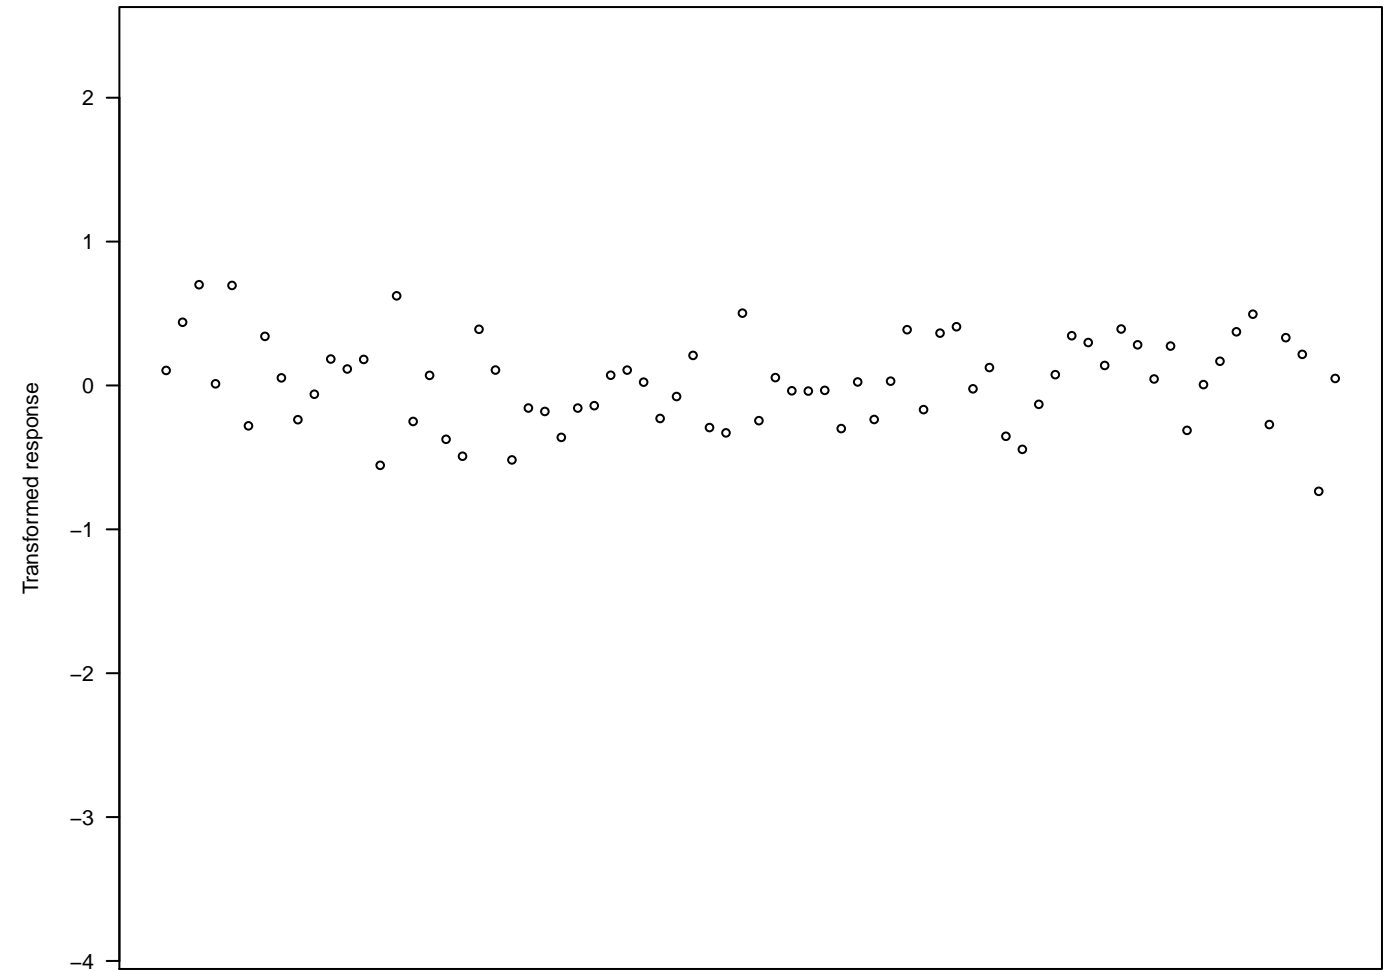

# Urea (Clinical Chemistry)

## HMGU

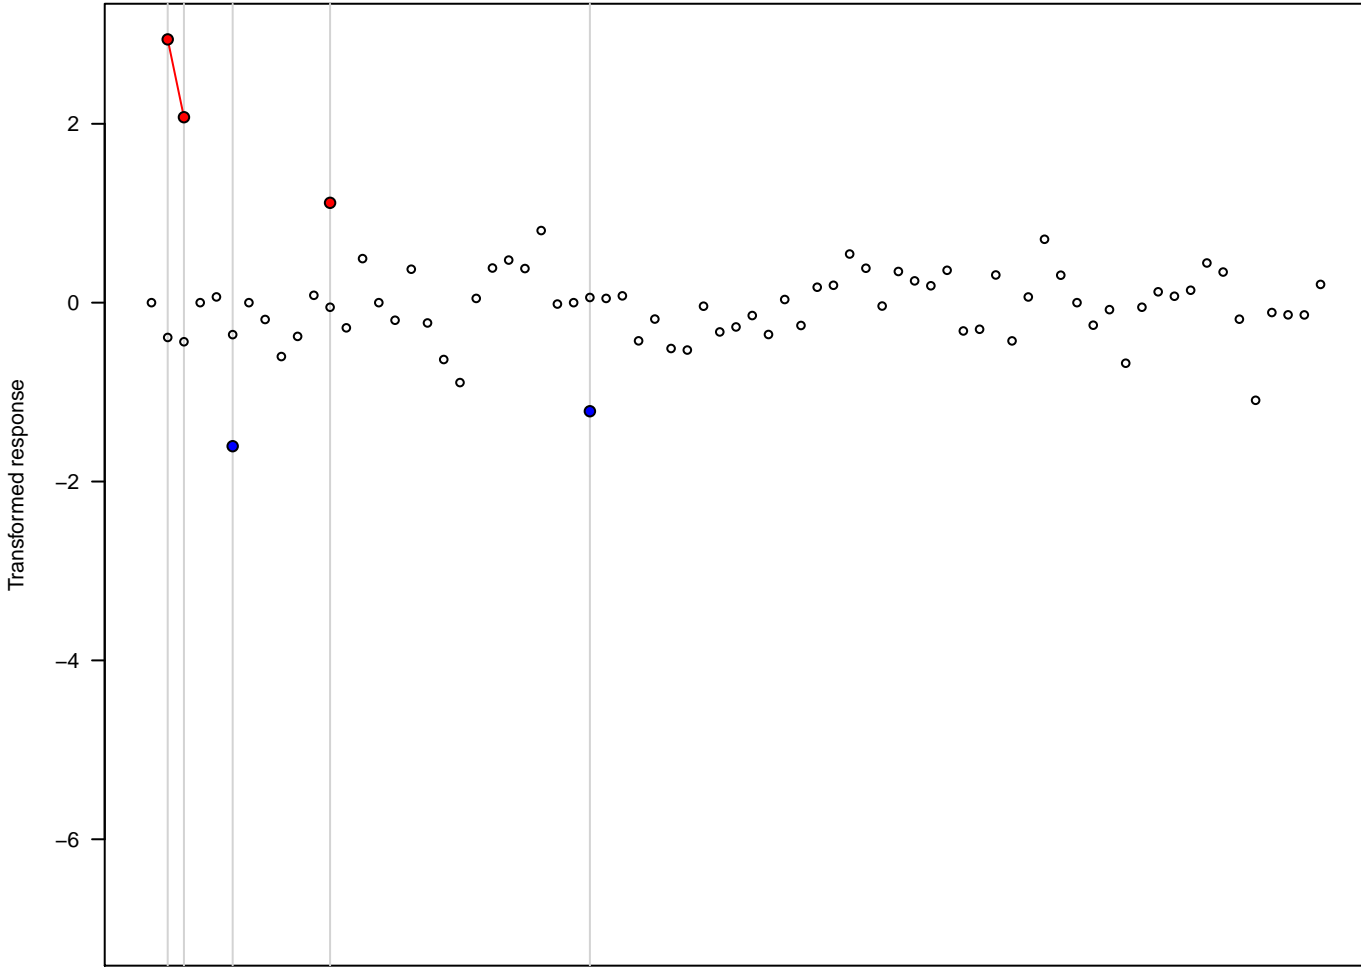

## MRC Harwell

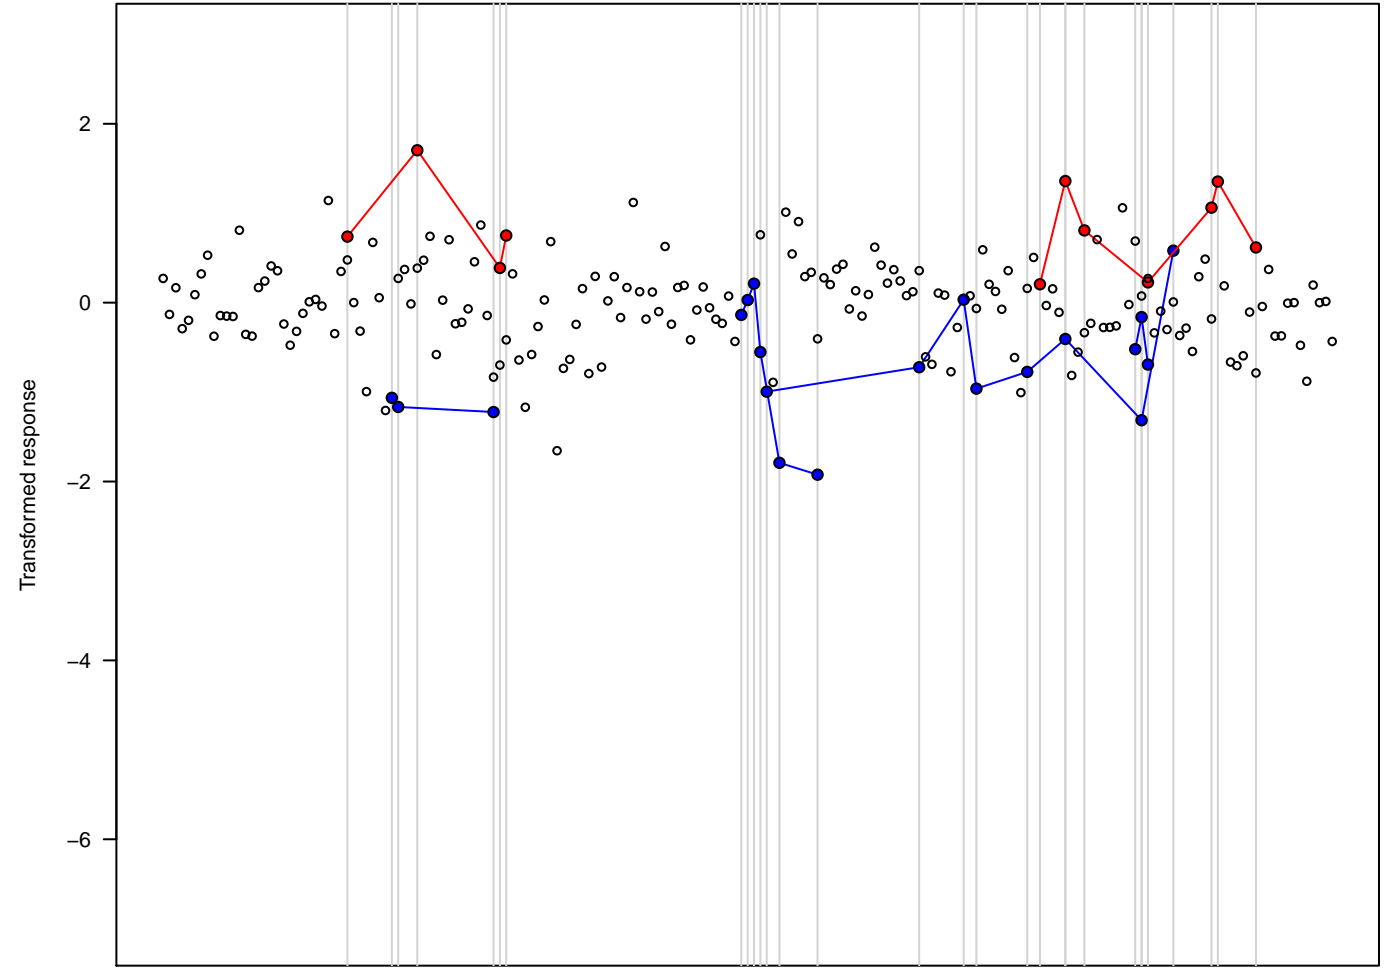

## WTSI

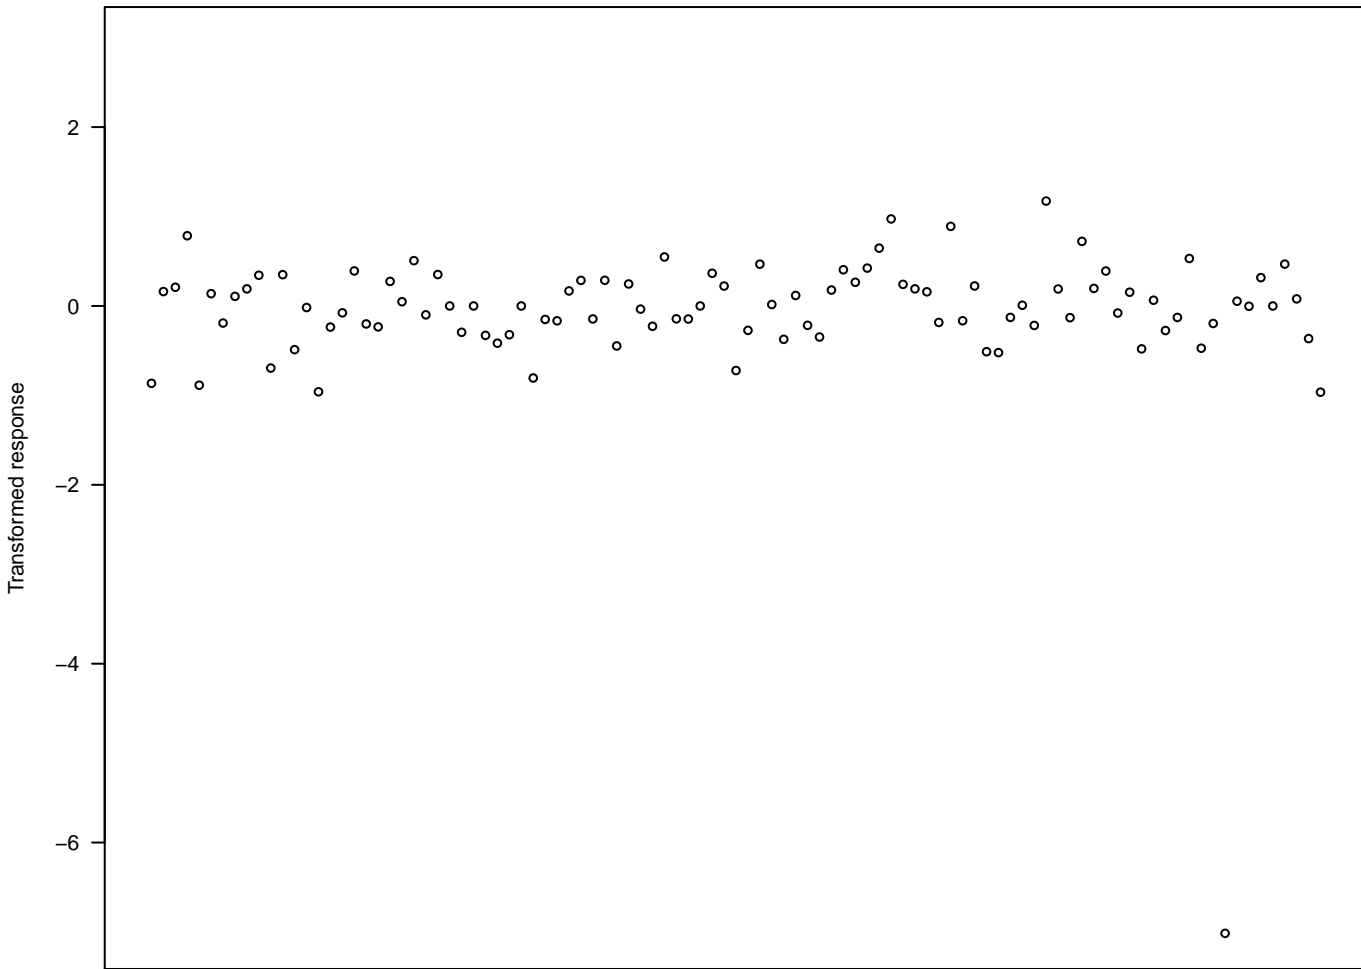

## ICS

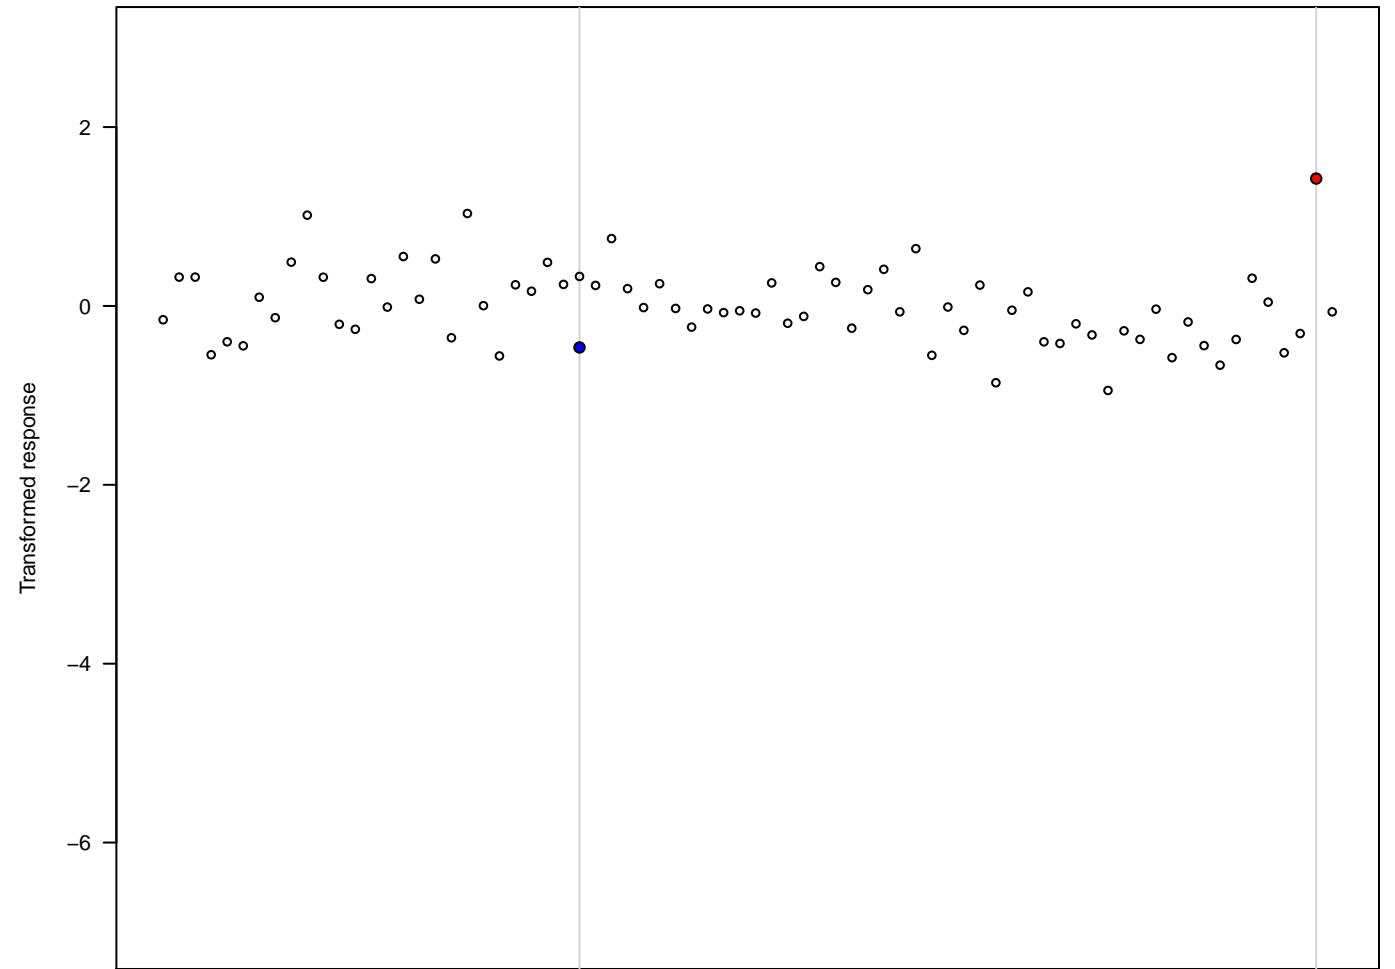

Creatinine  
(Clinical Chemistry)

HMGU

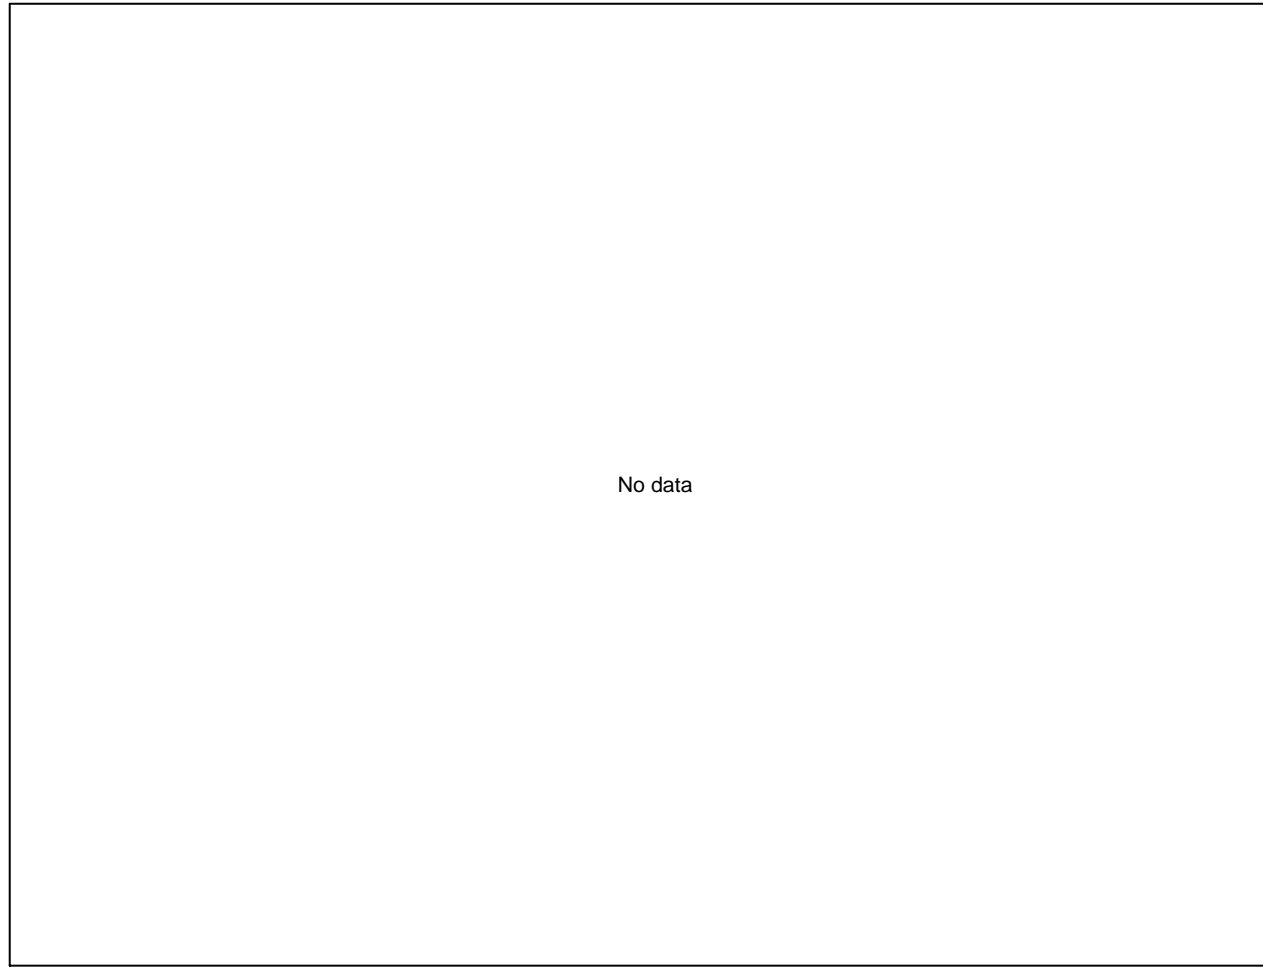

MRC Harwell

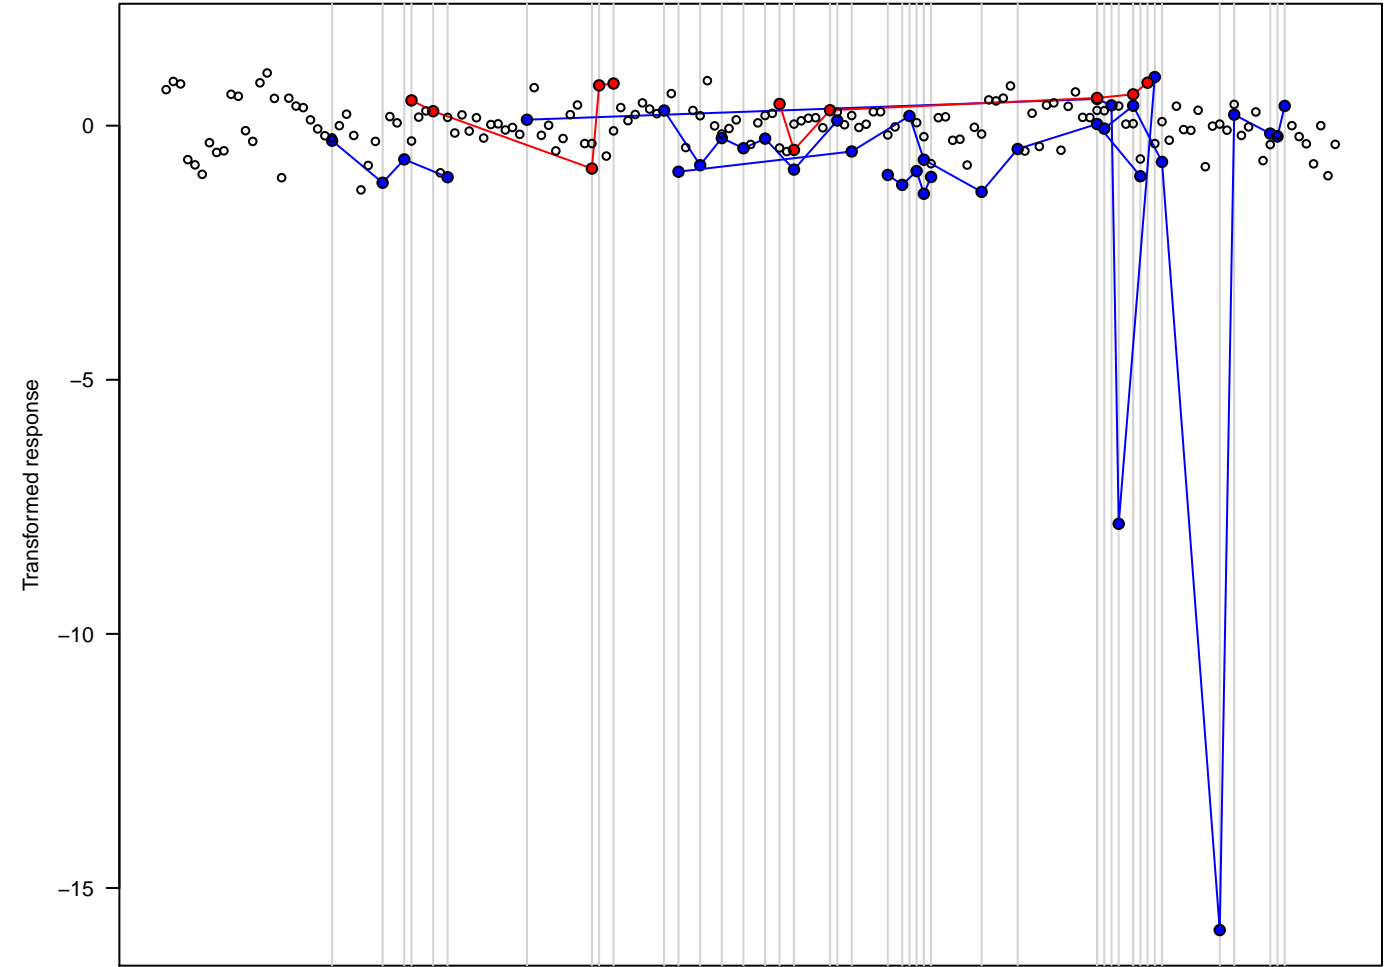

WTSI

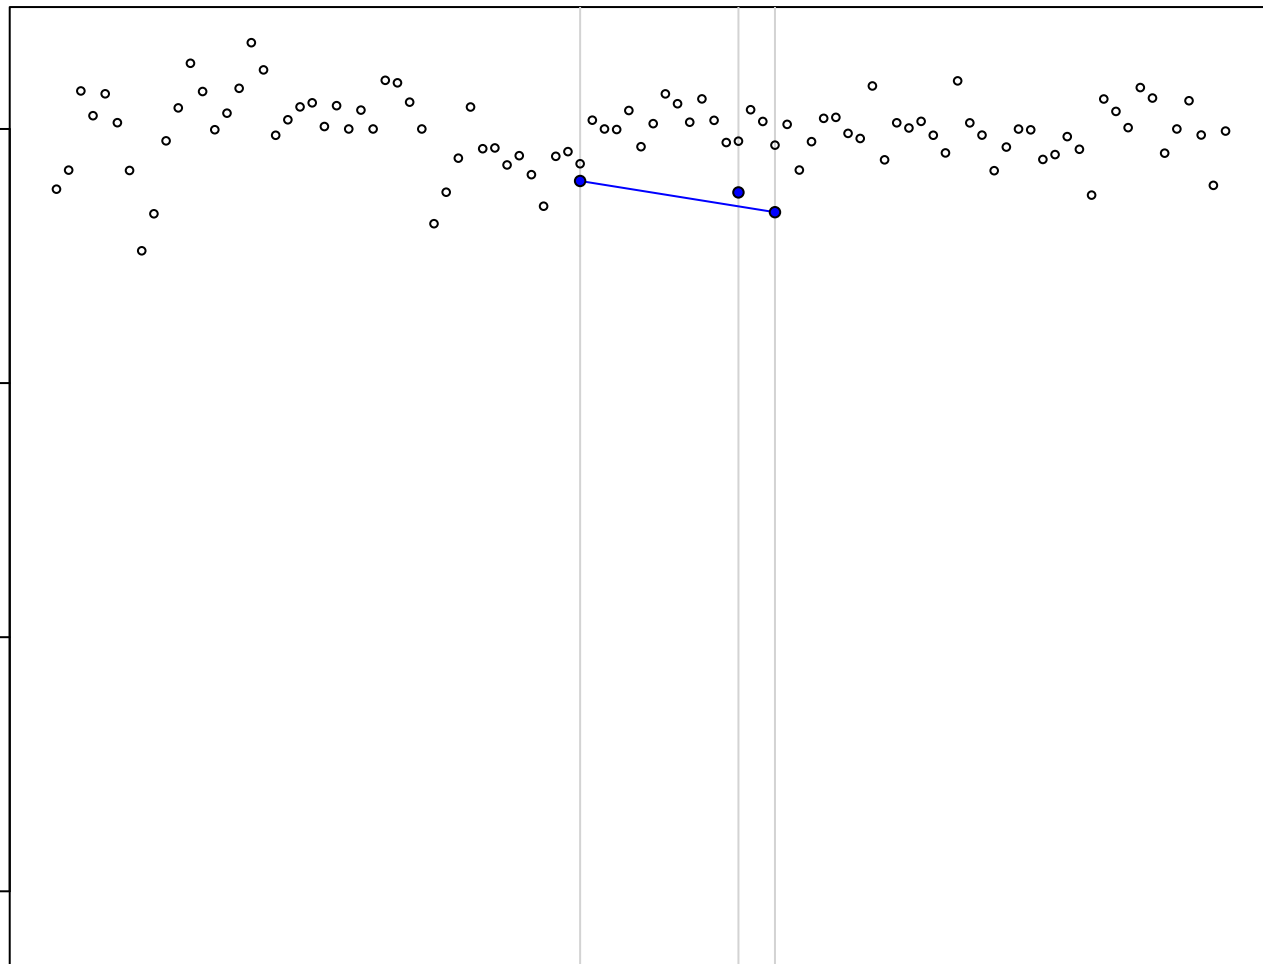

ICS

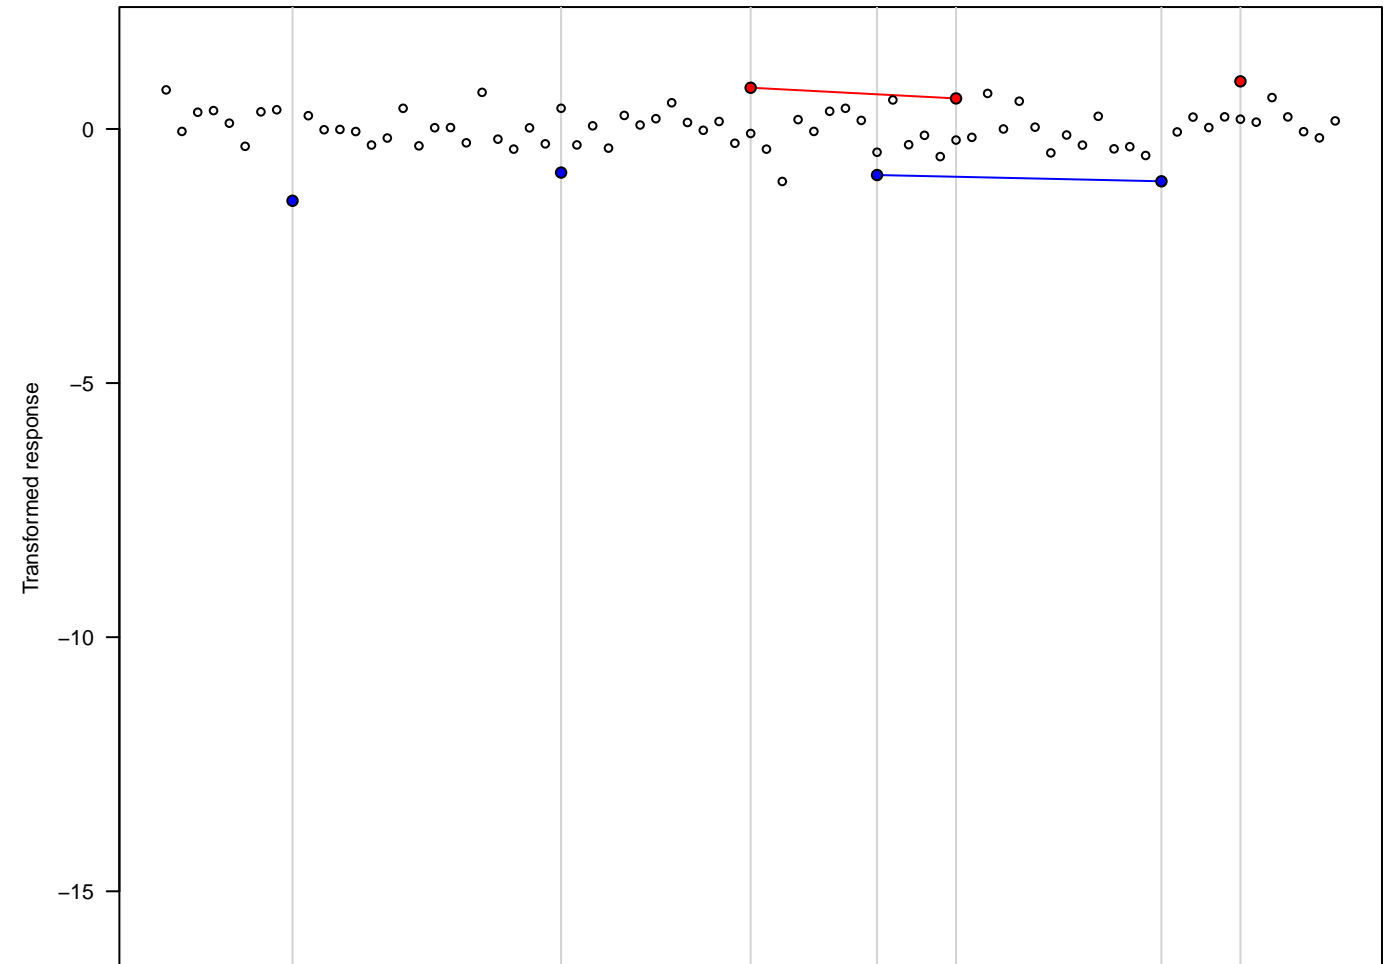



Sodium  
(Clinical Chemistry)

HMGU

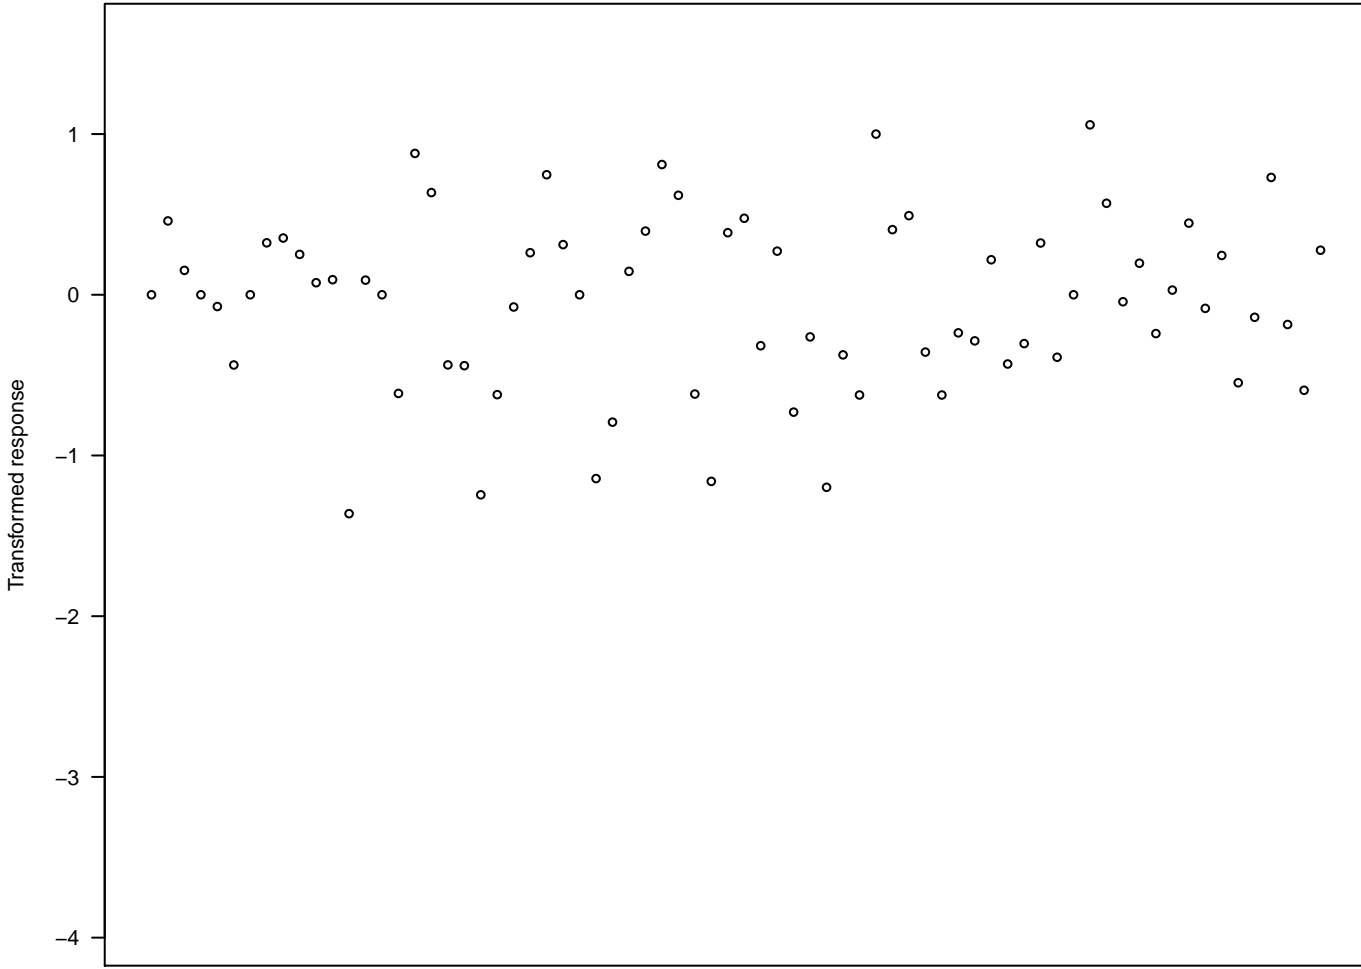

MRC Harwell

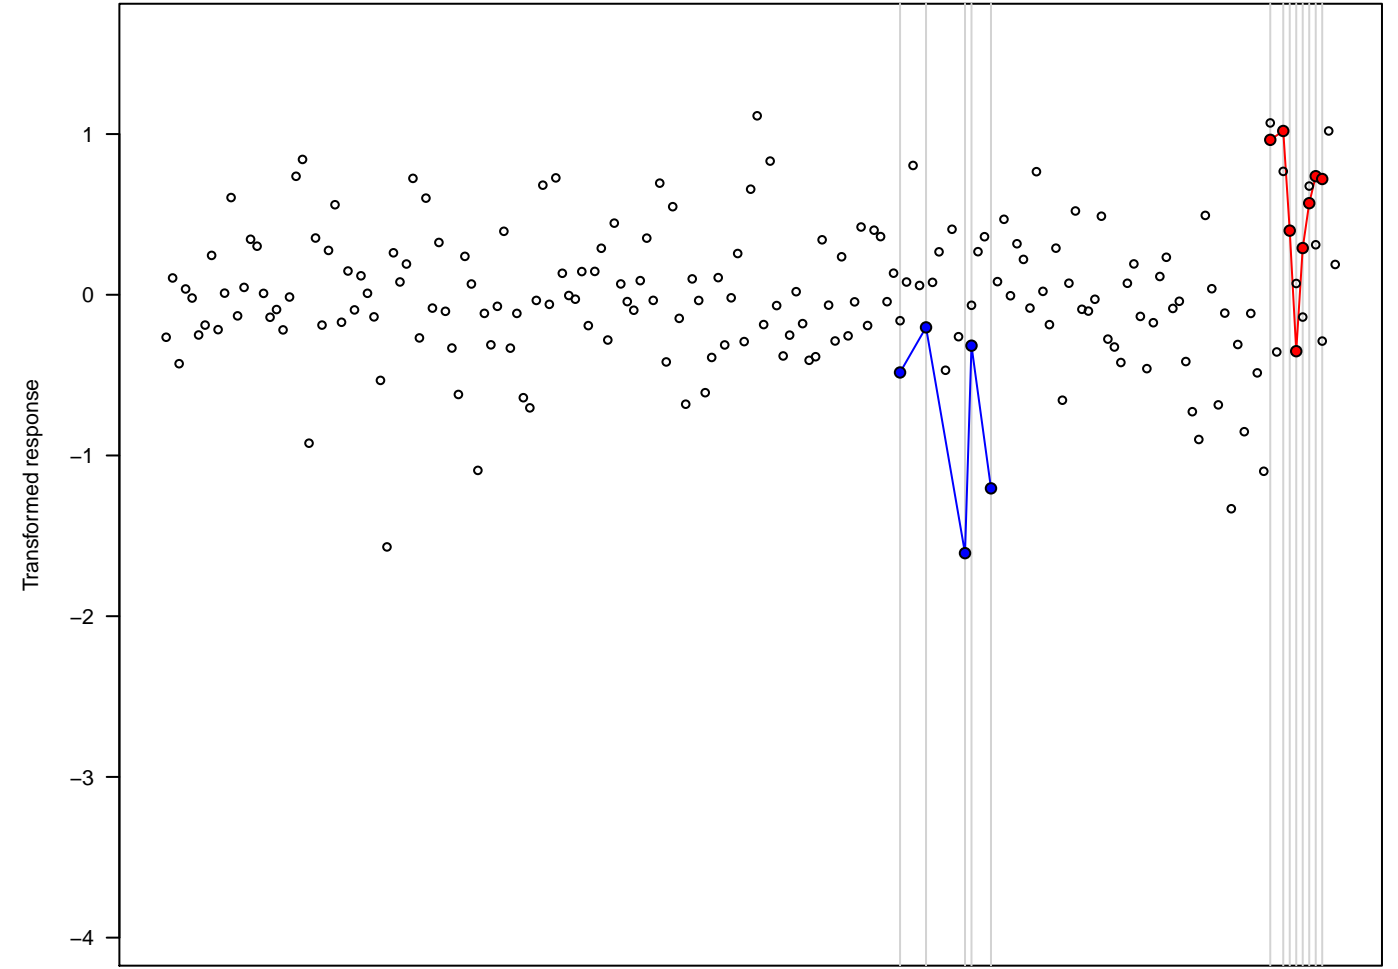

WTSI

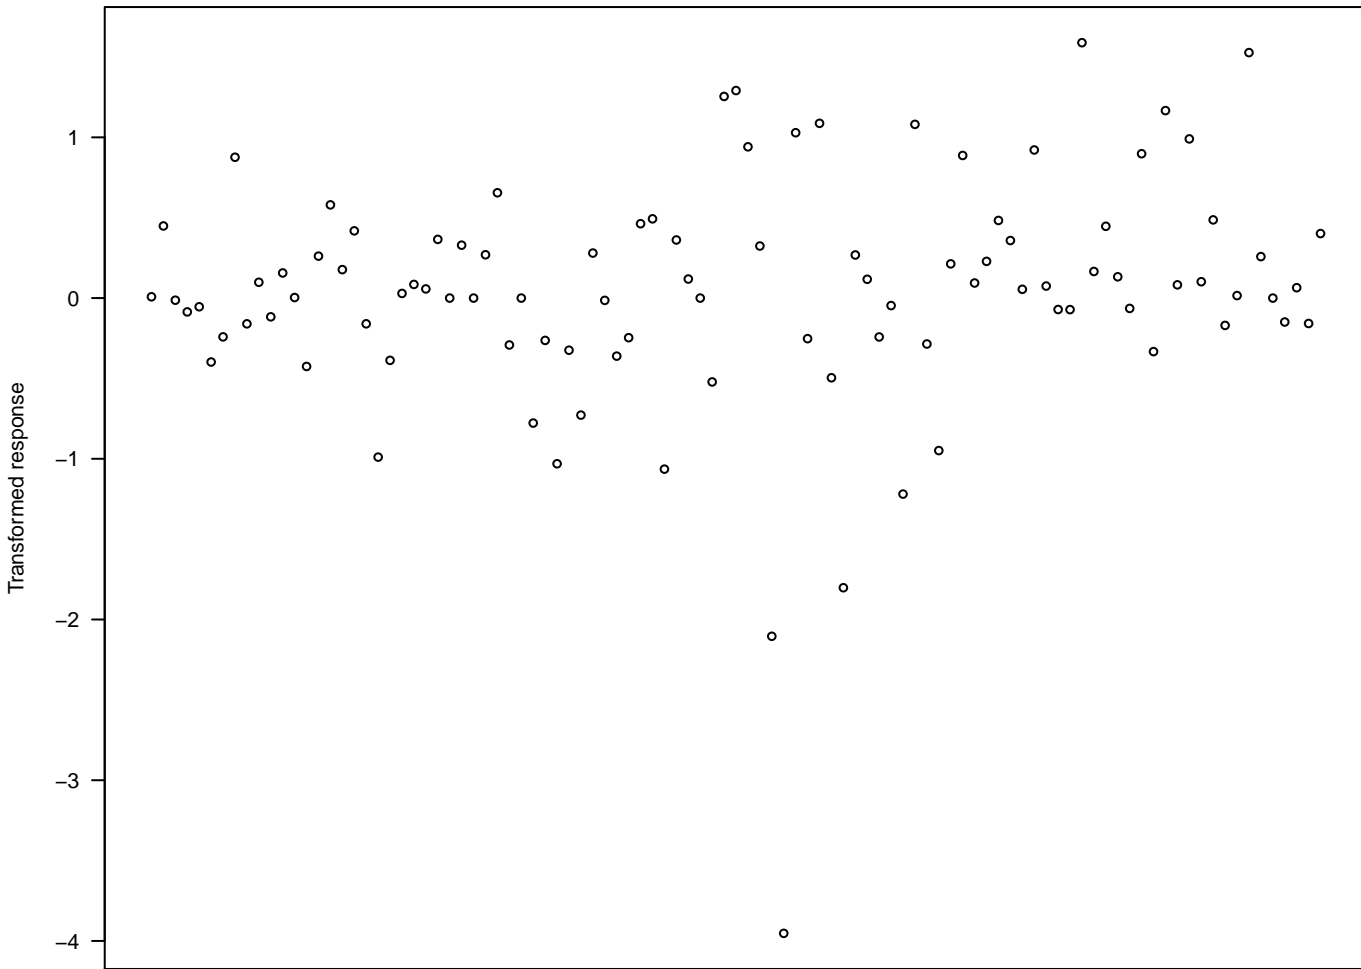

ICS

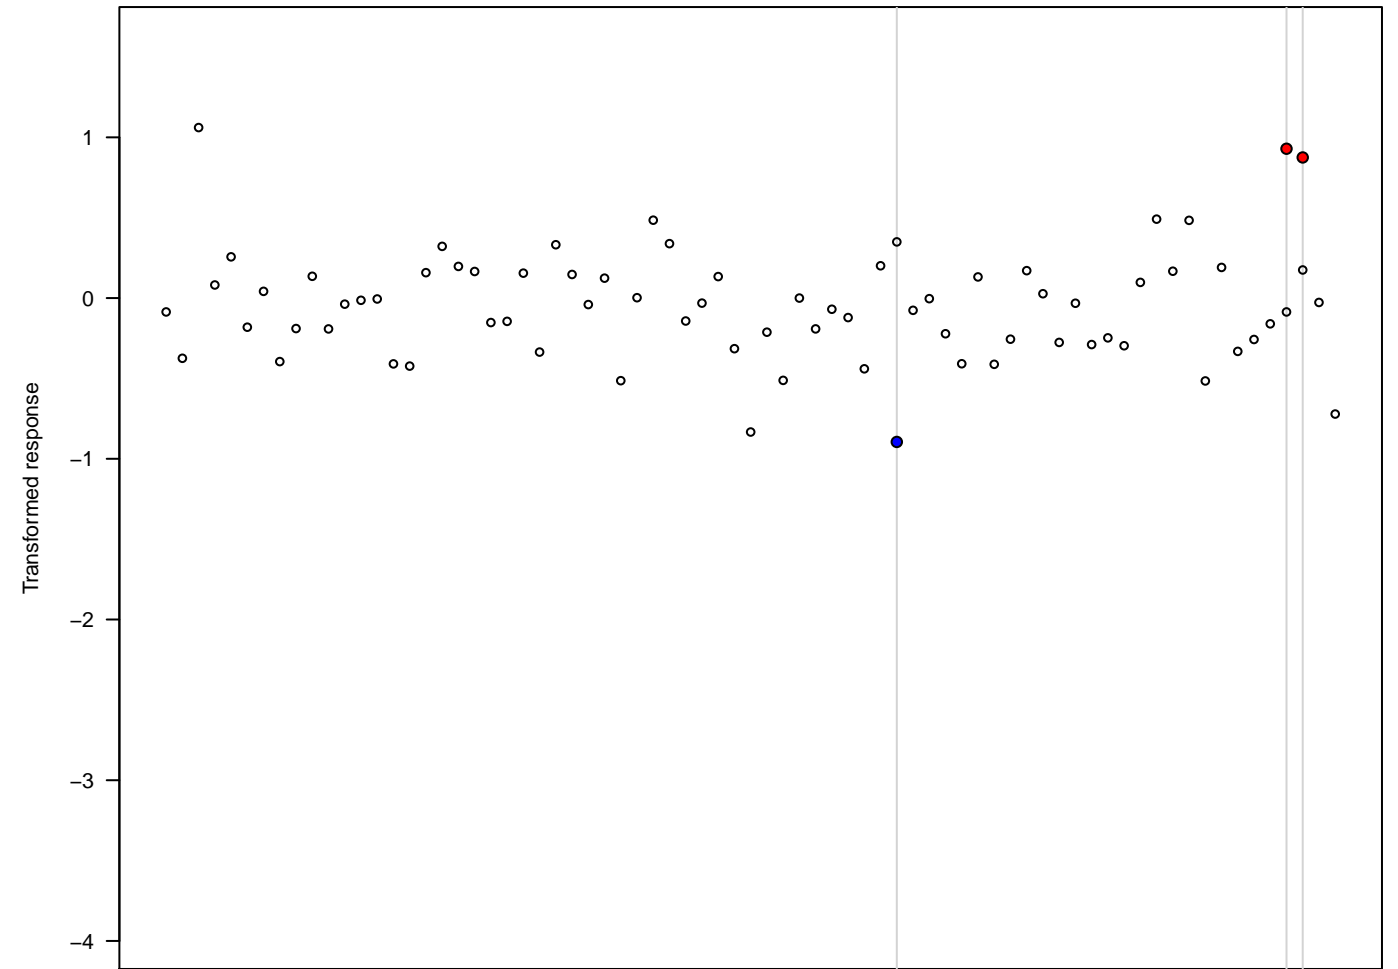

Potassium  
(Clinical Chemistry)

HMGU

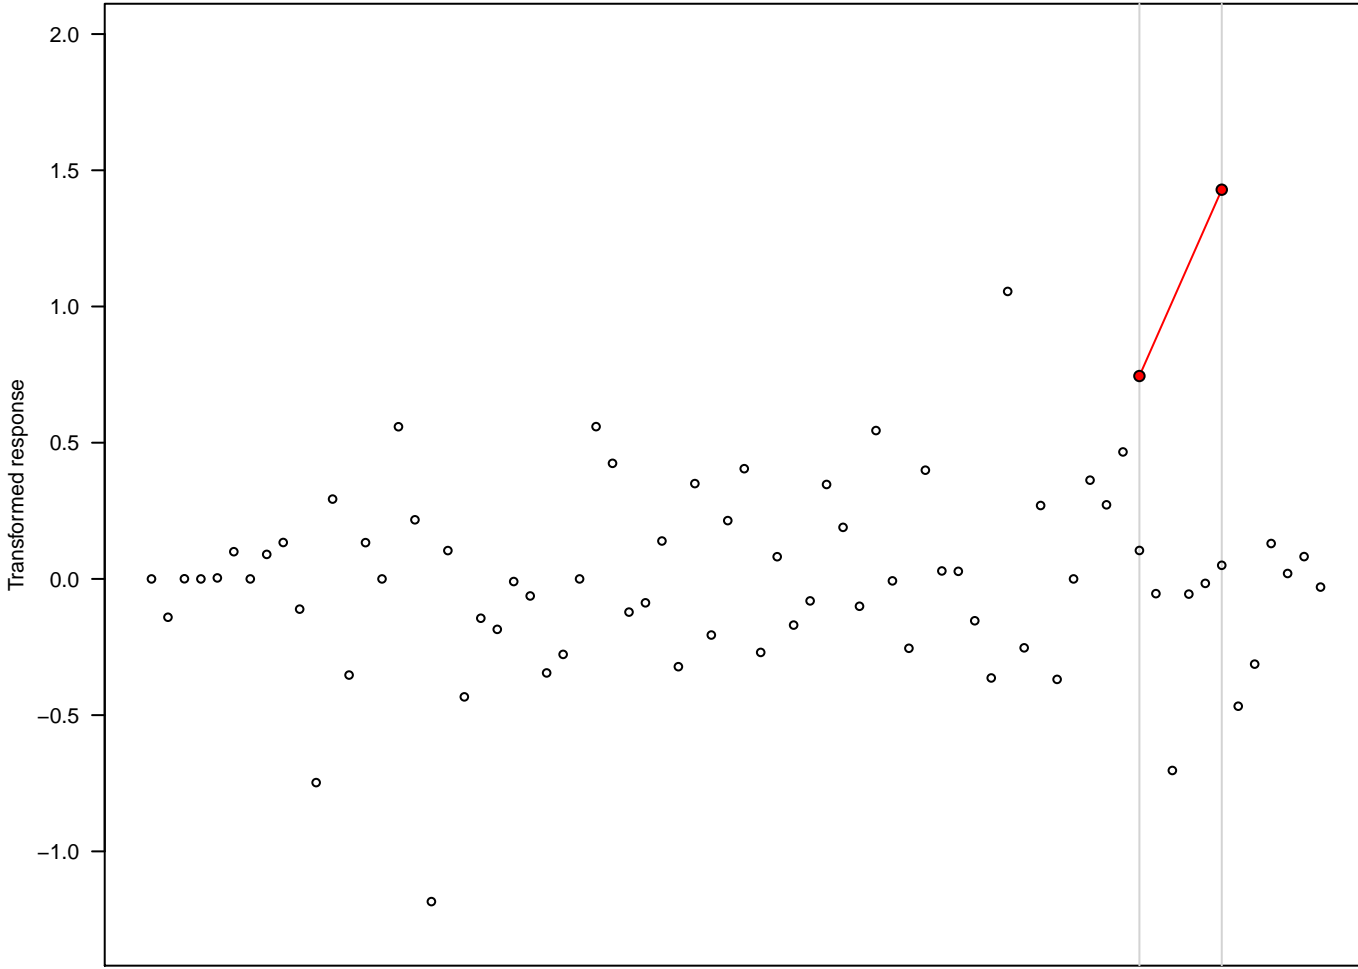

MRC Harwell

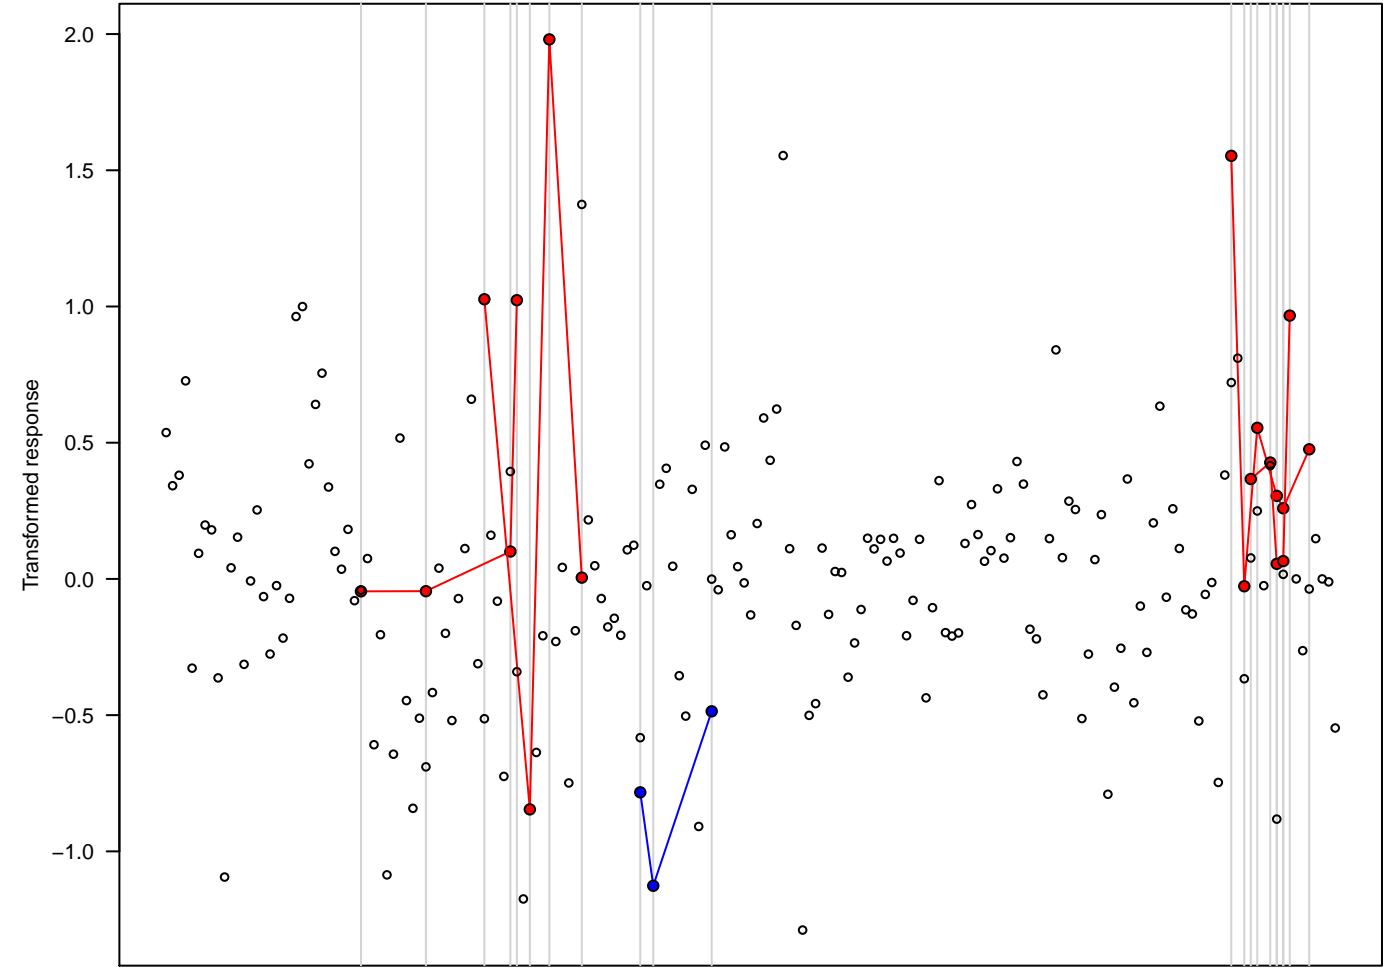

WTSI

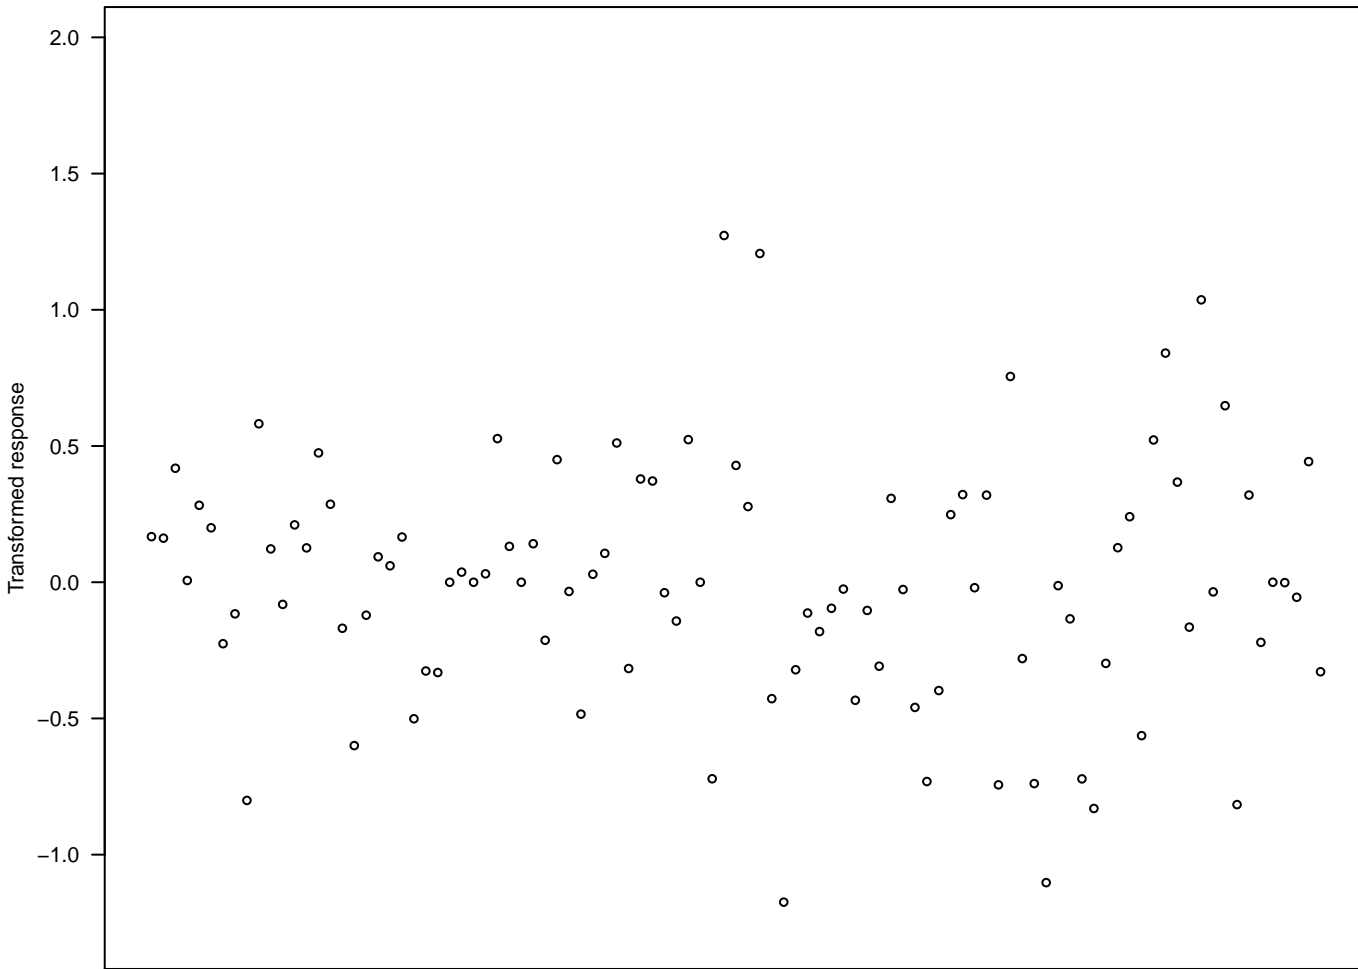

ICS

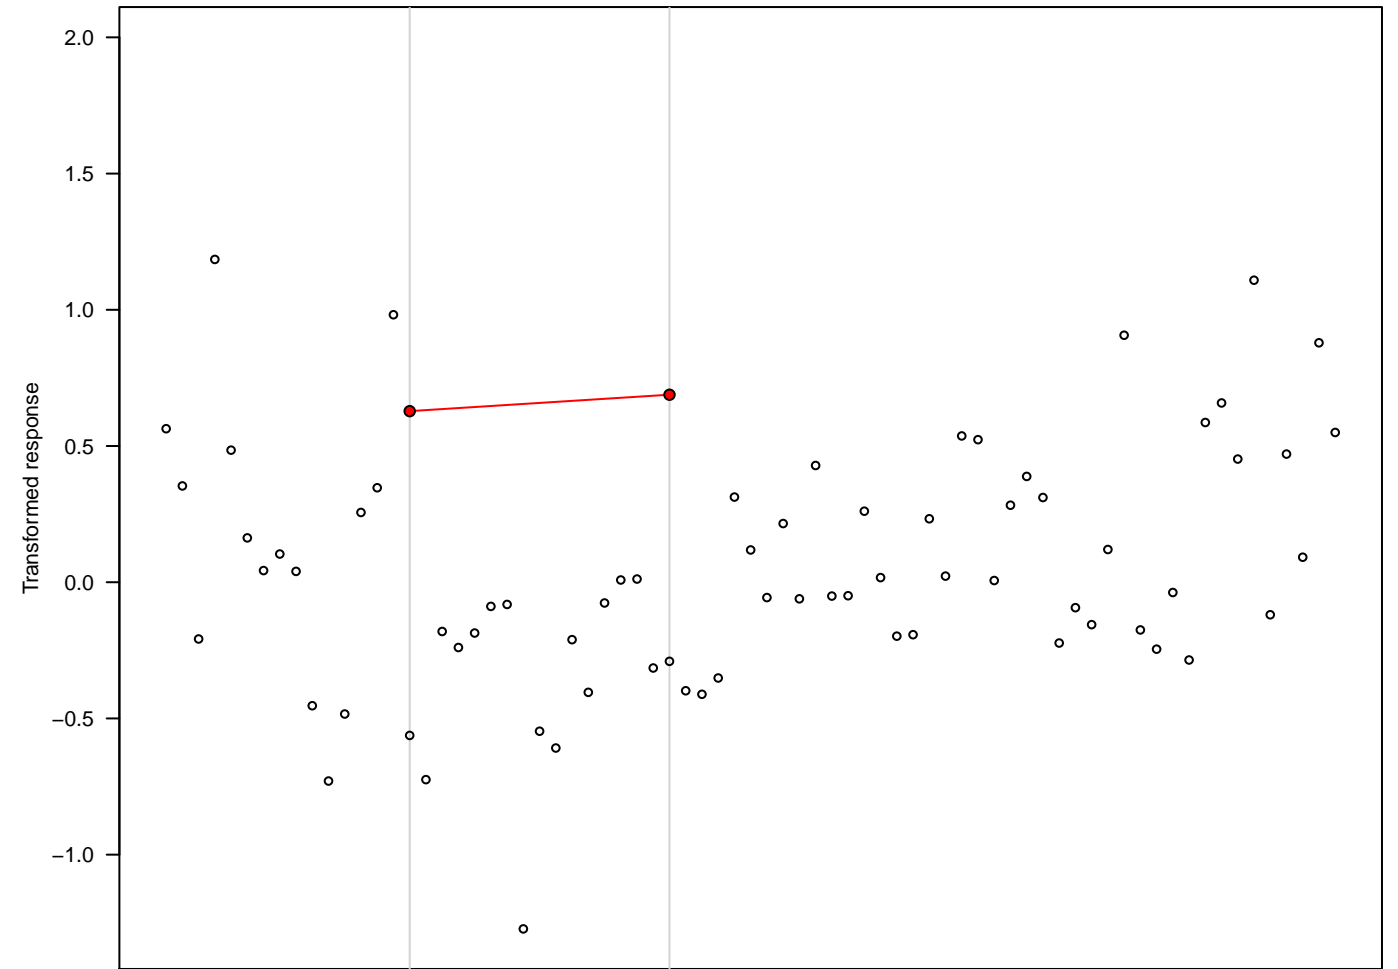

Chloride  
(Clinical Chemistry)

HMGU

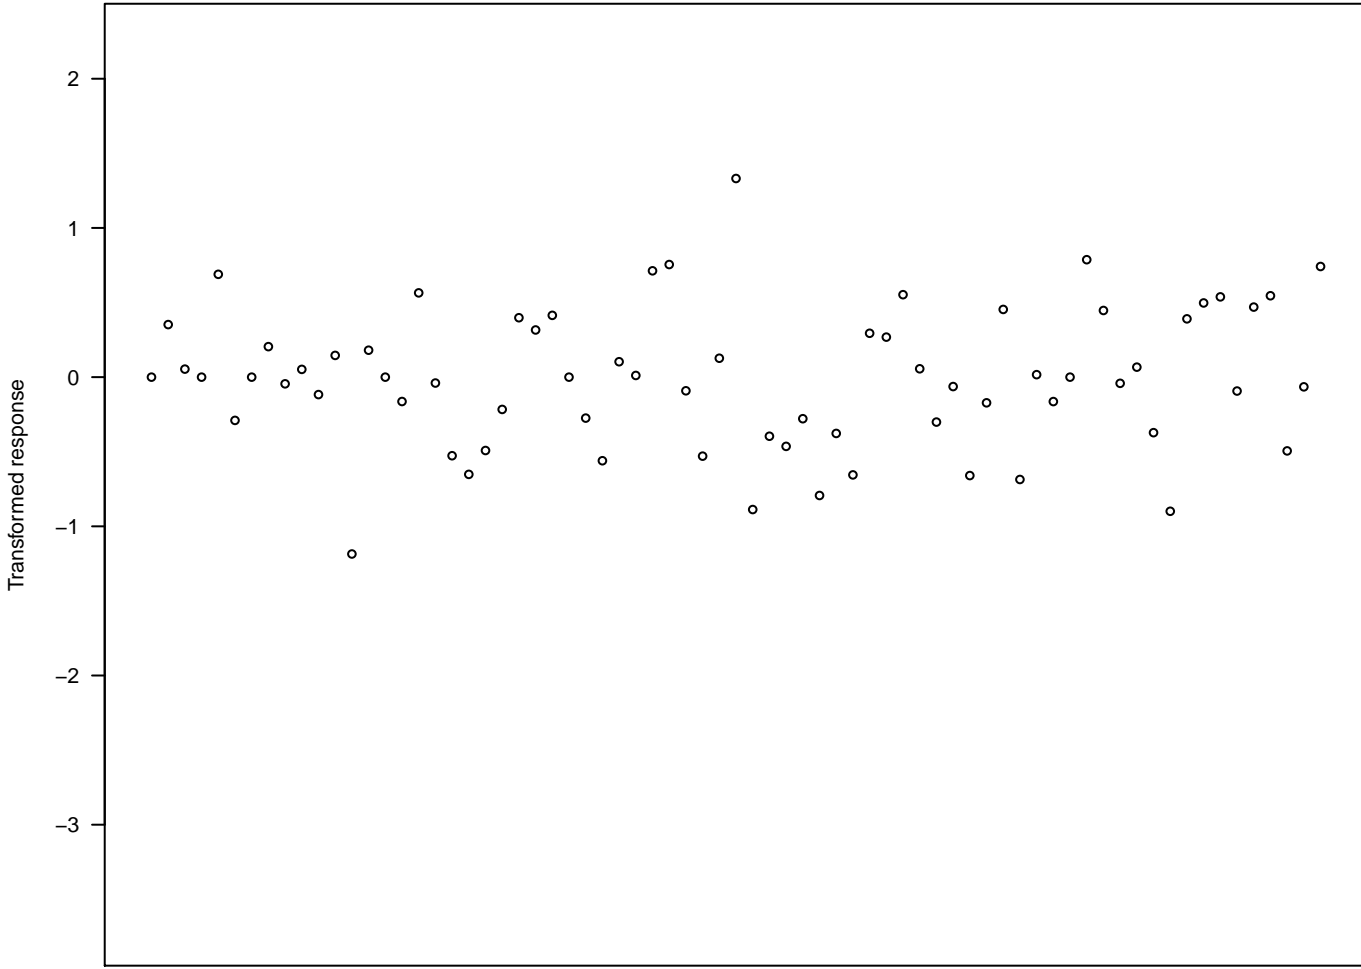

MRC Harwell

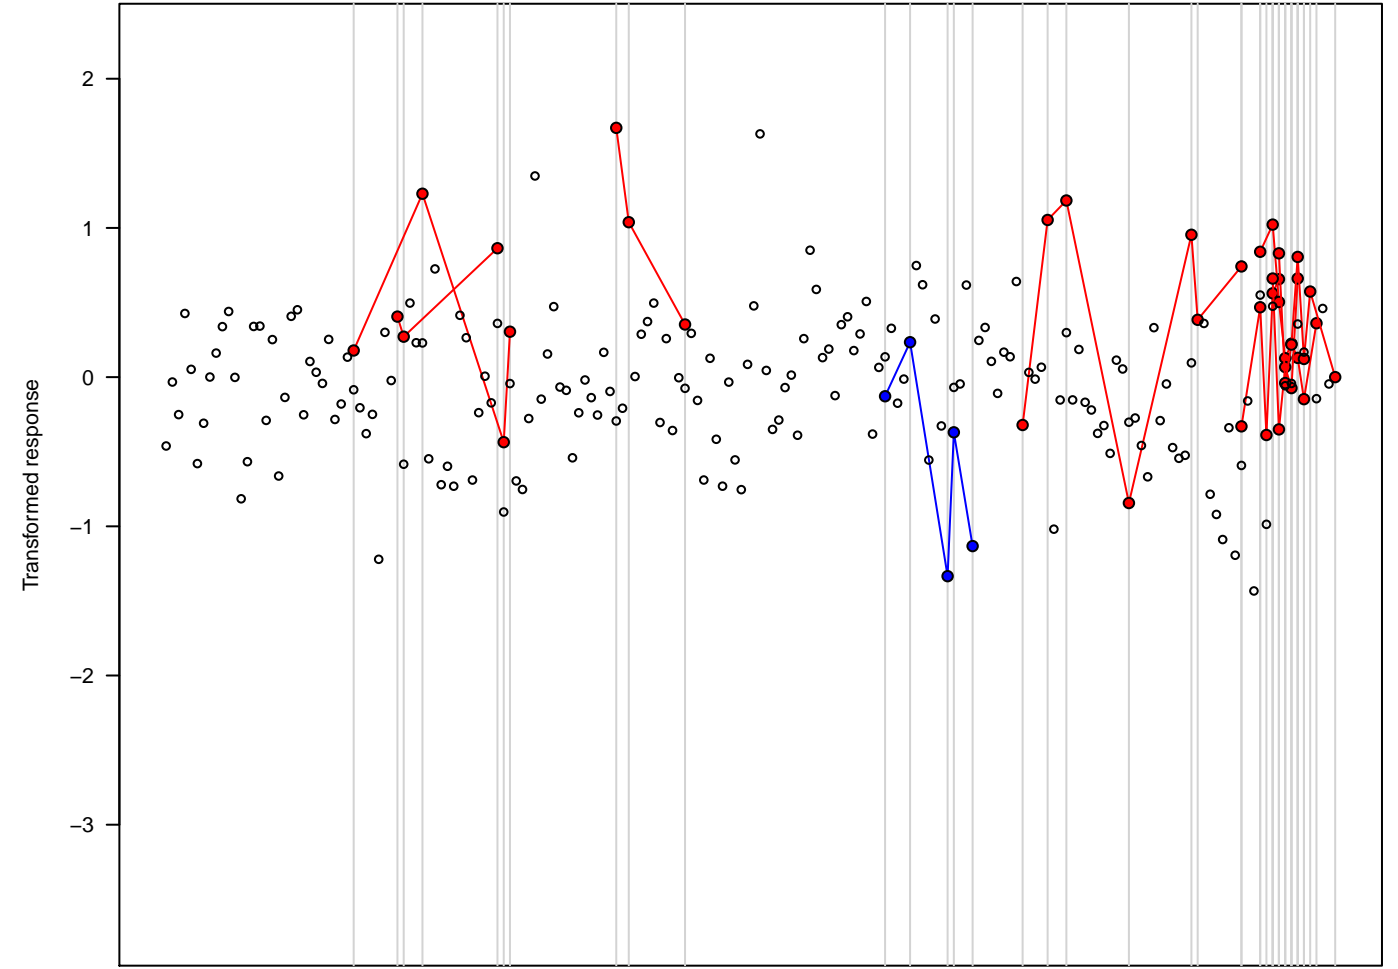

WTSI

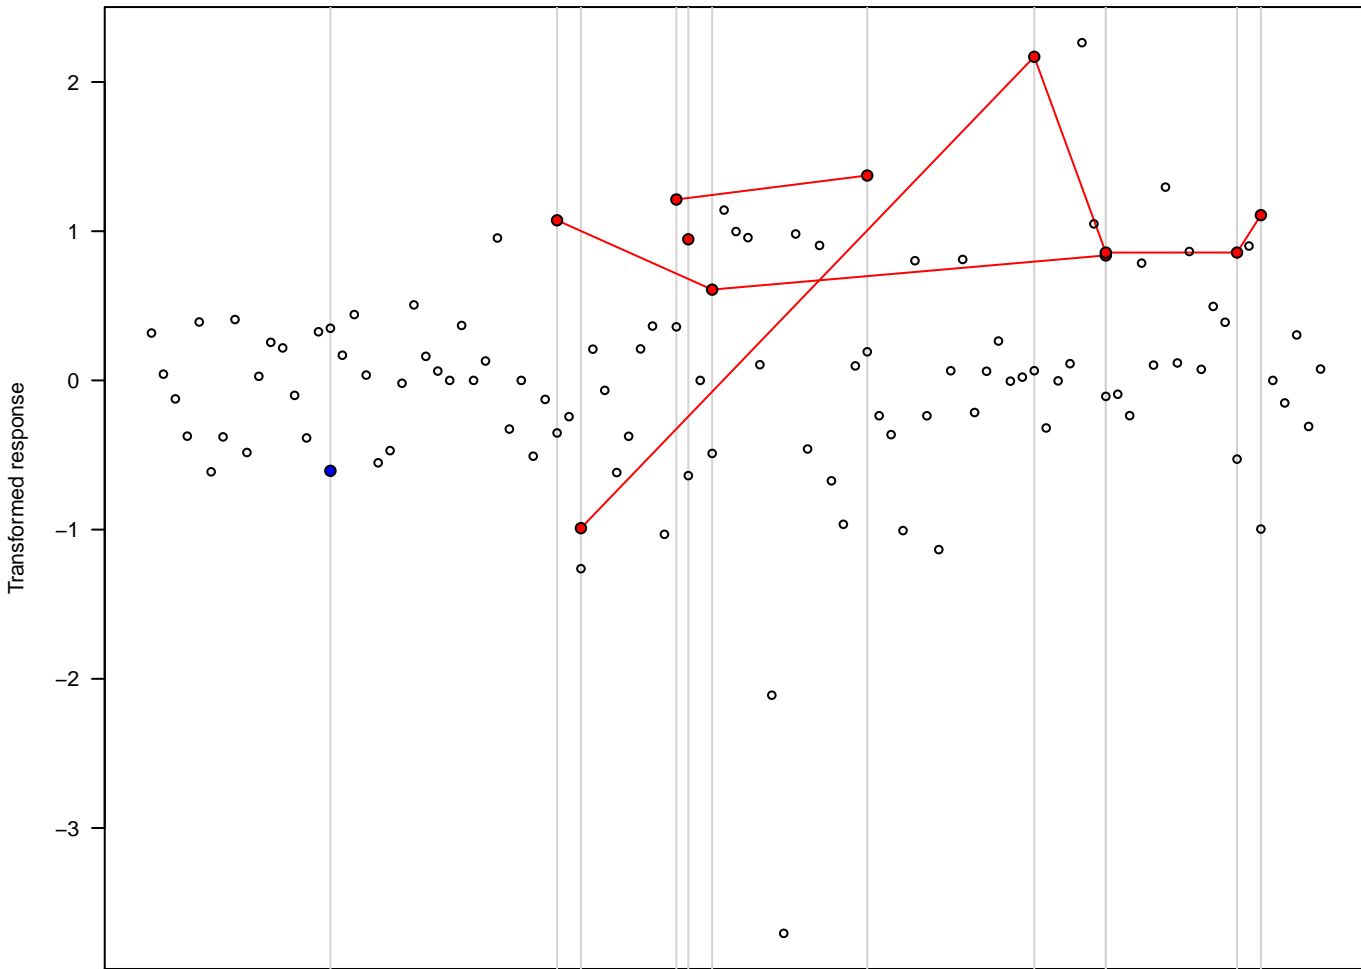

ICS

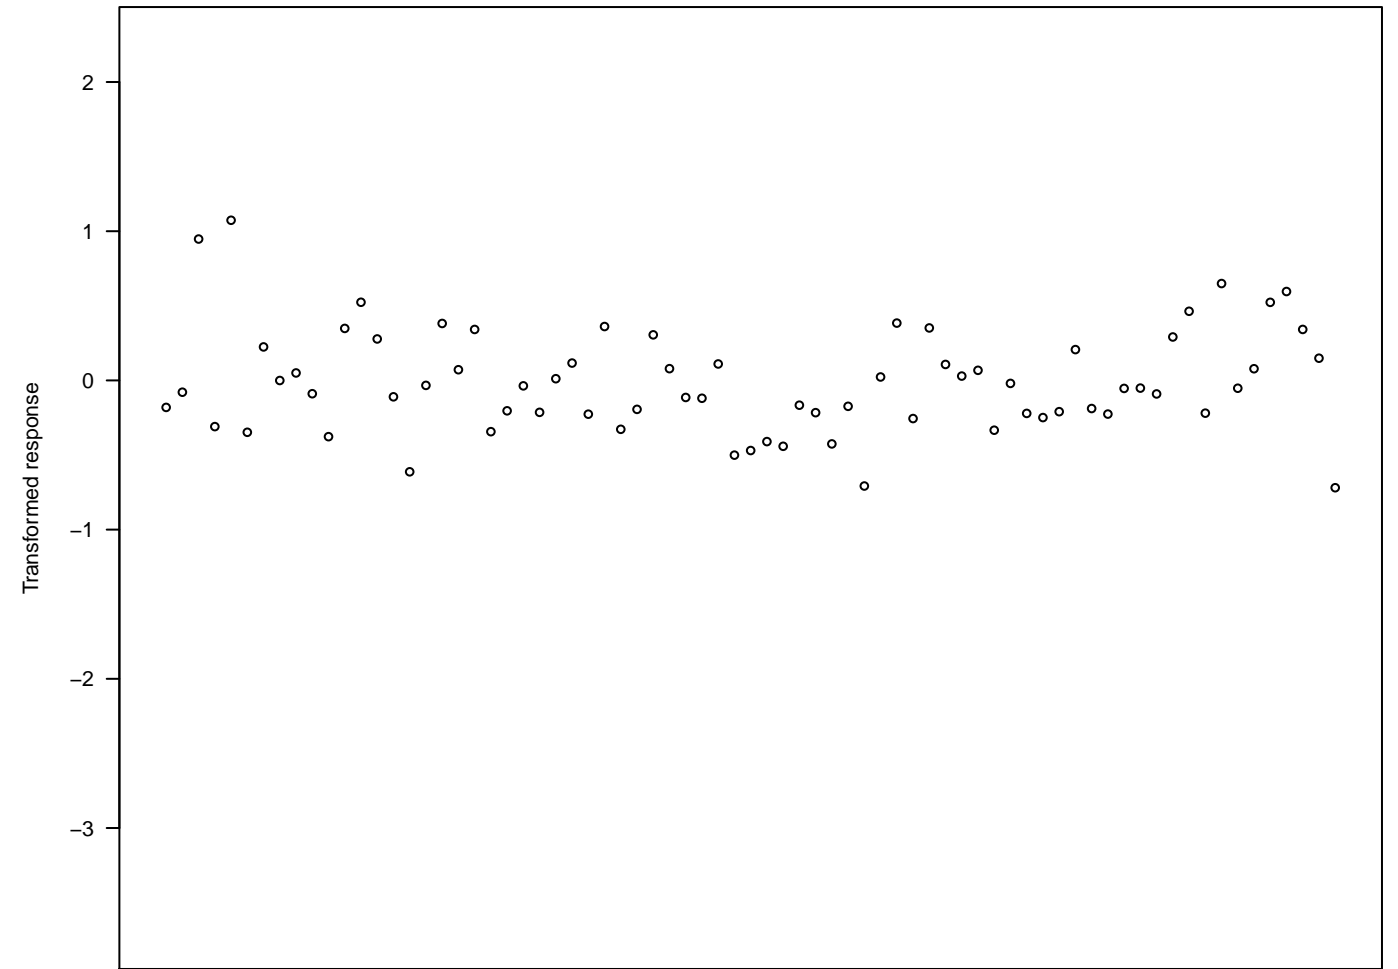

Total protein  
(Clinical Chemistry)

HMGU

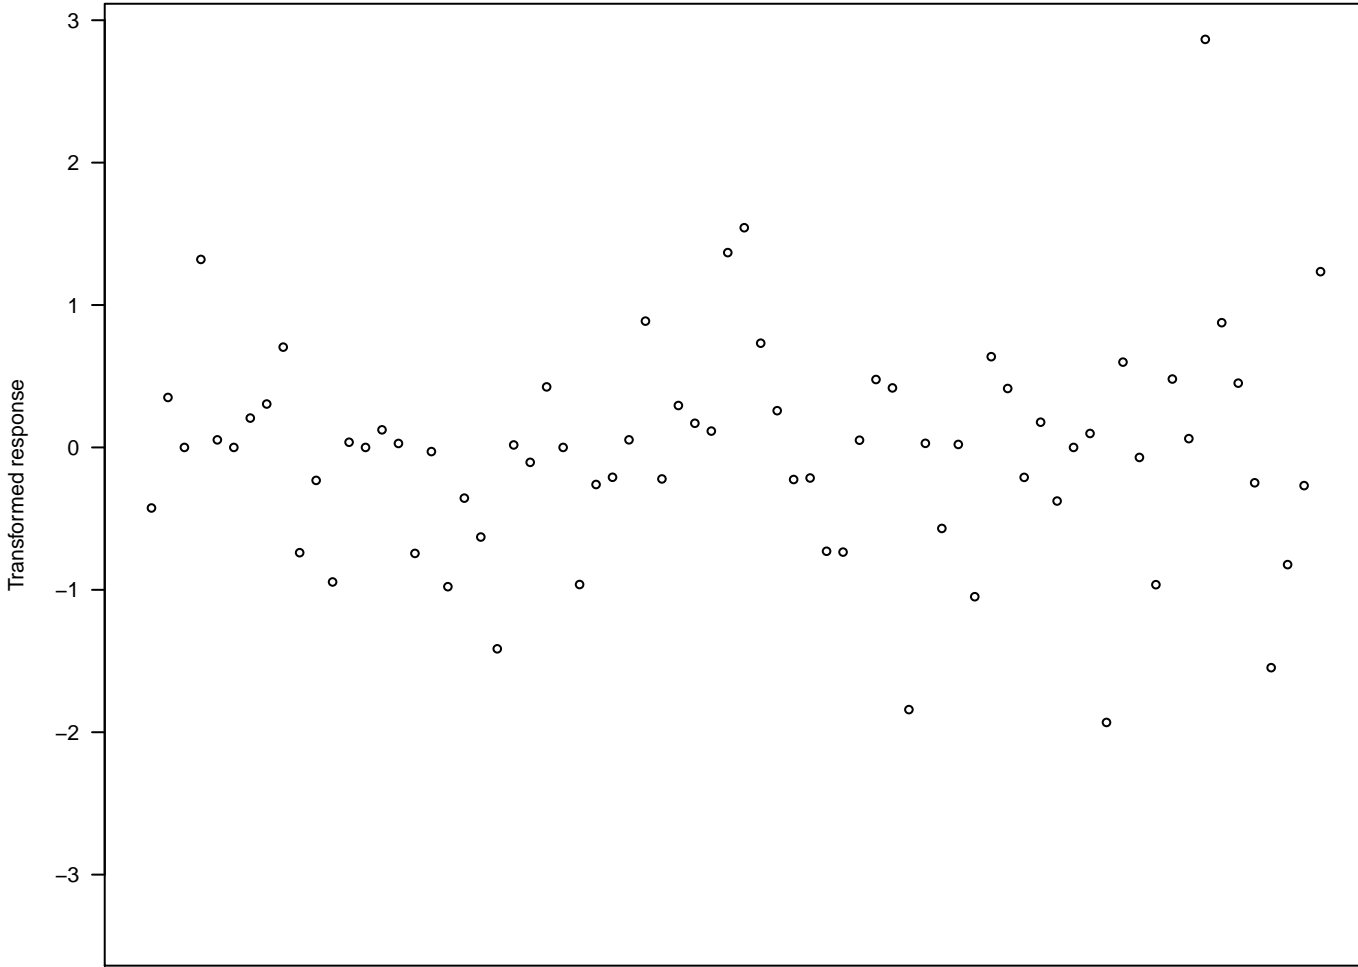

MRC Harwell

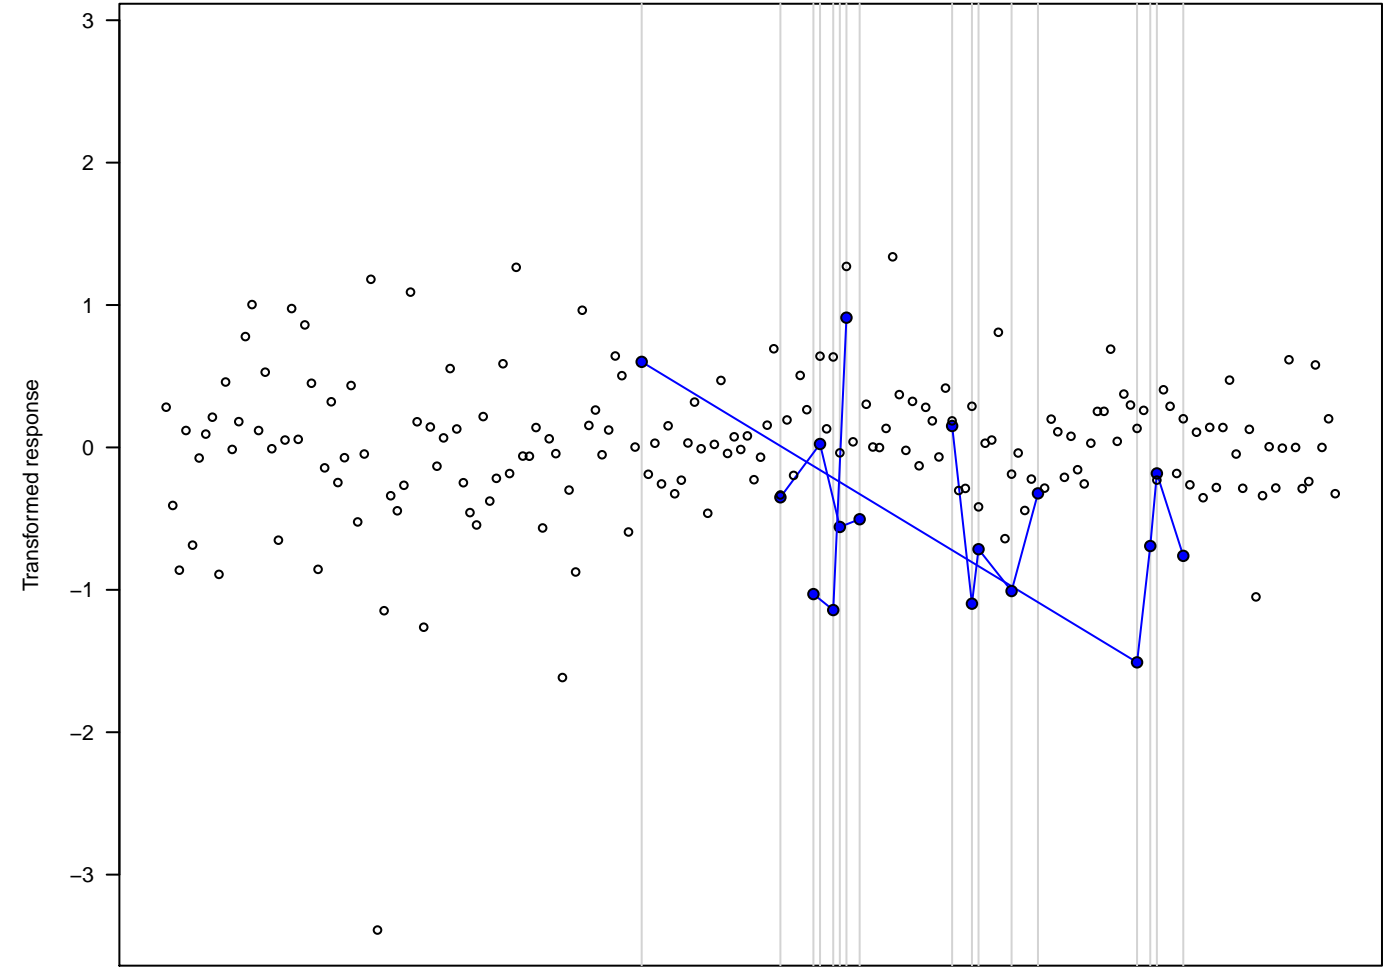

WTSI

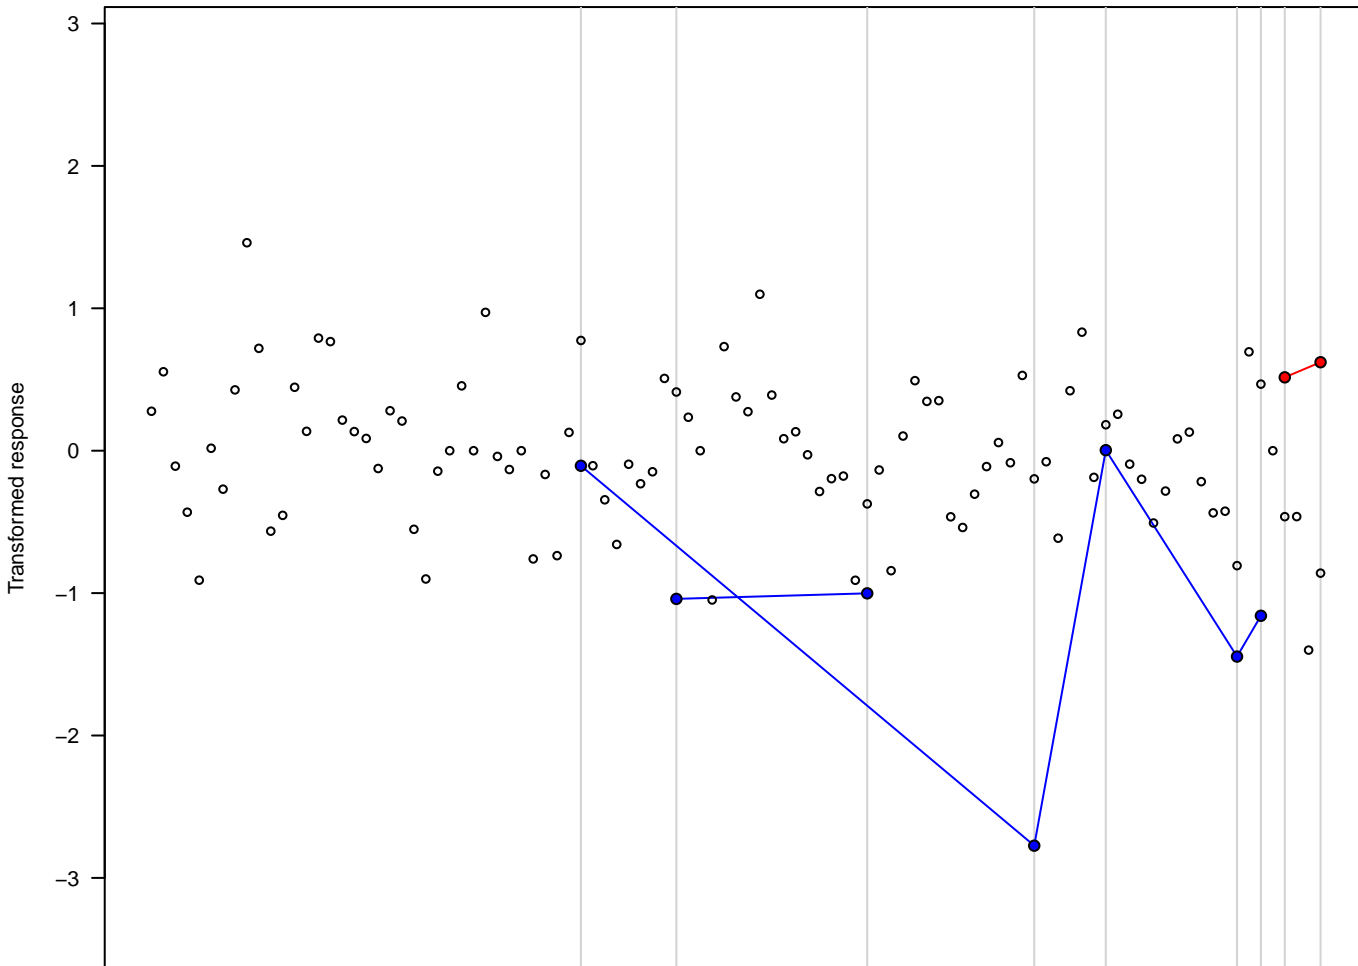

ICS

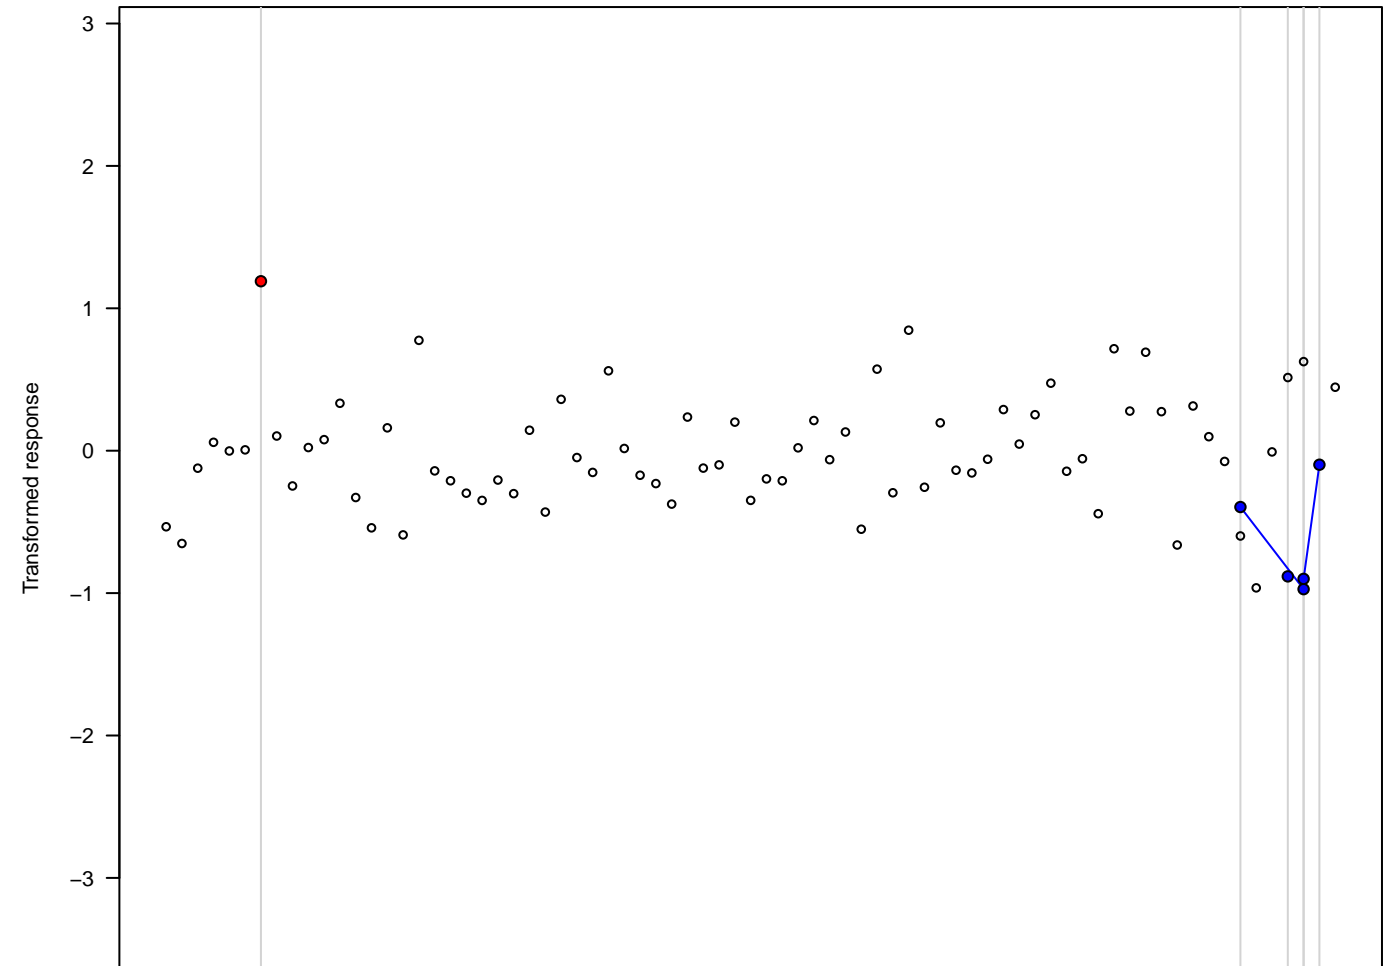

Albumin  
(Clinical Chemistry)

HMGU

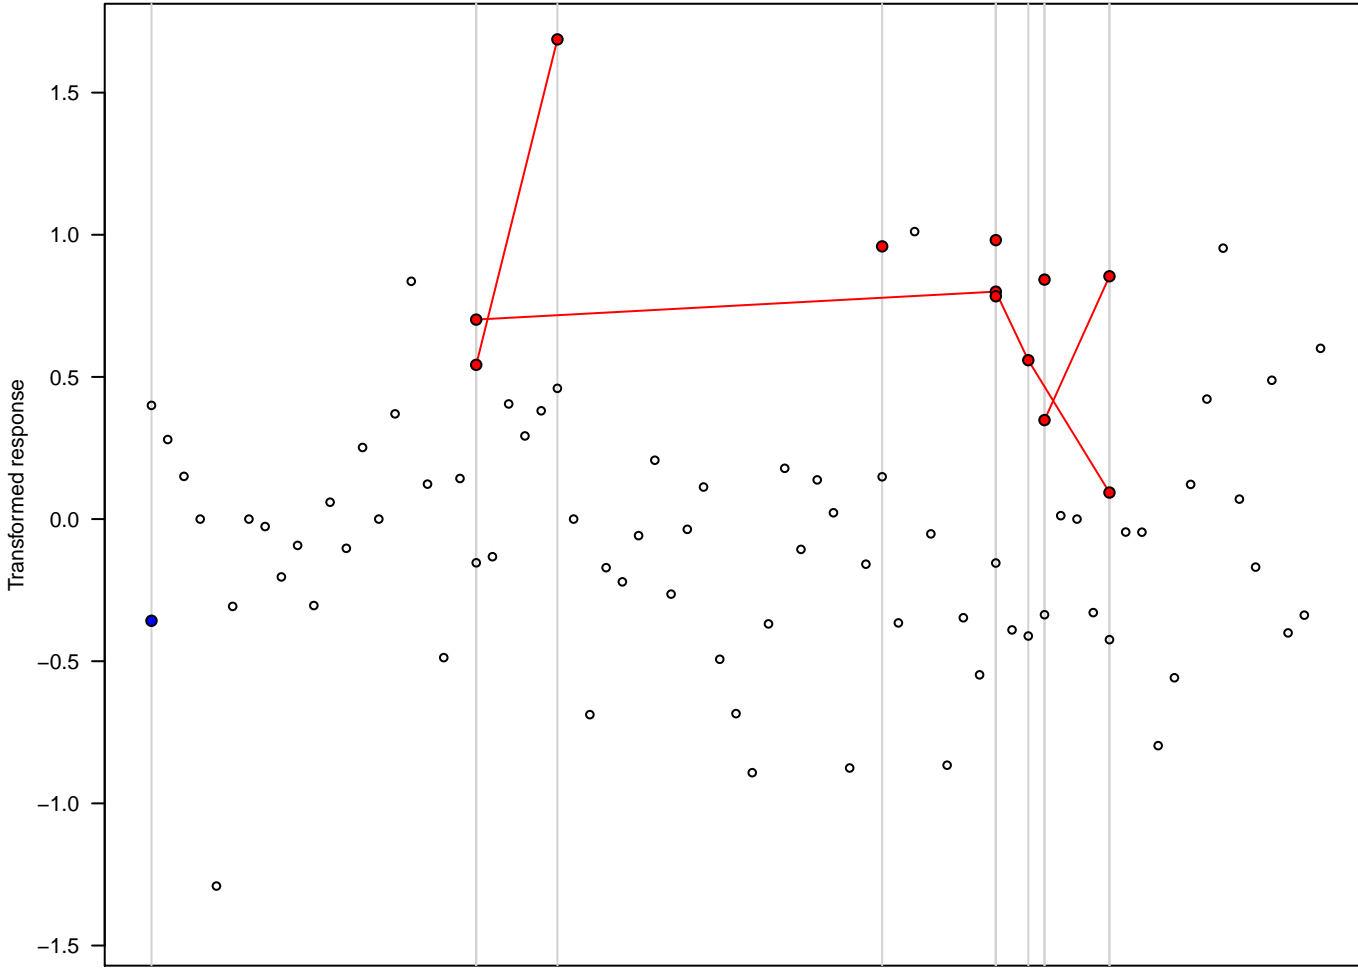

MRC Harwell

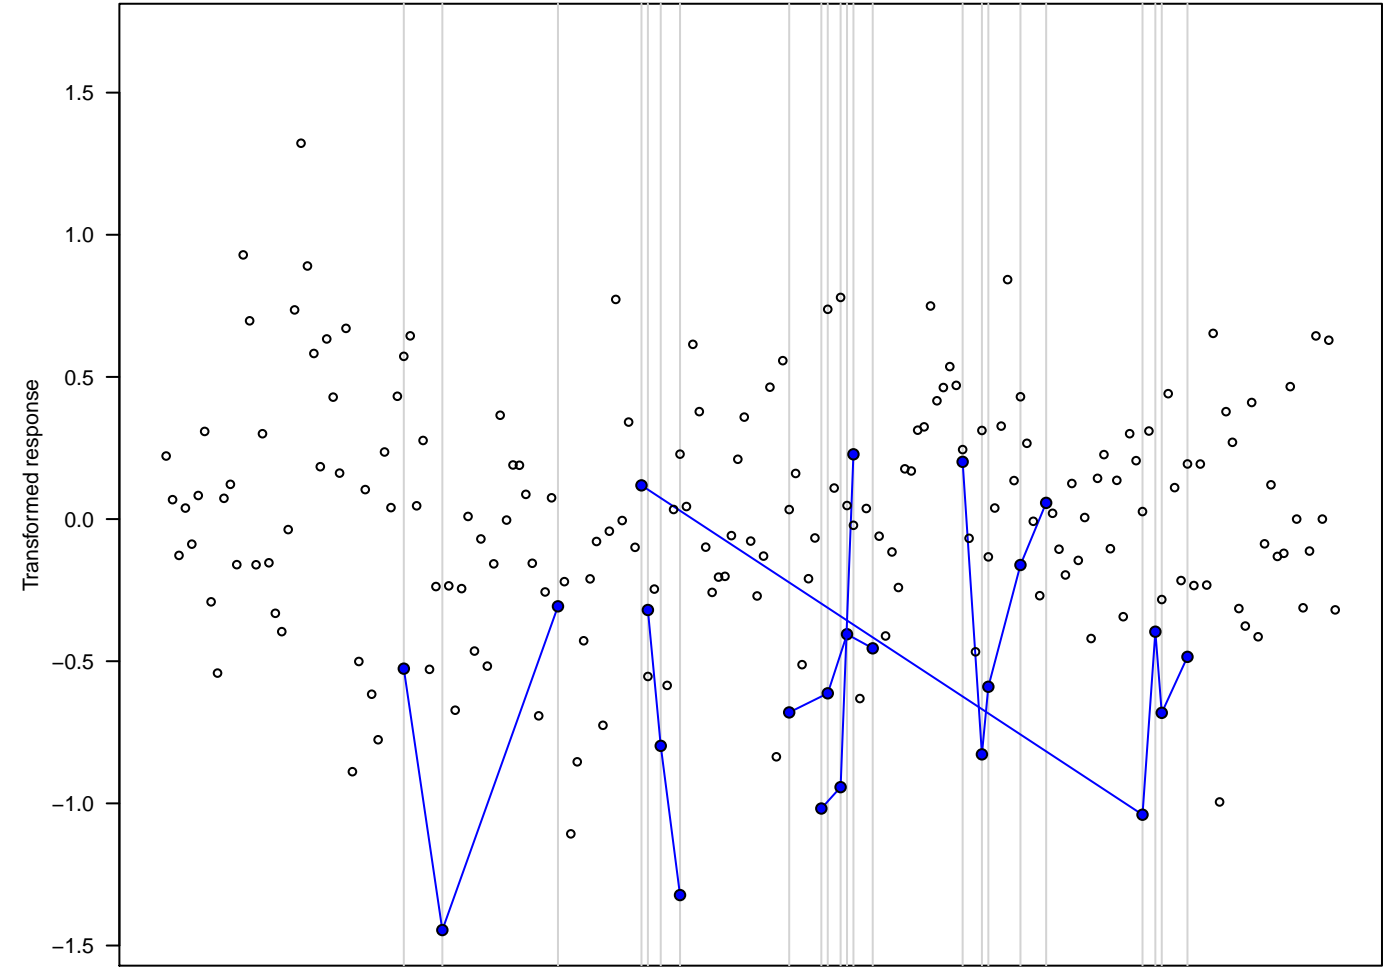

WTSI

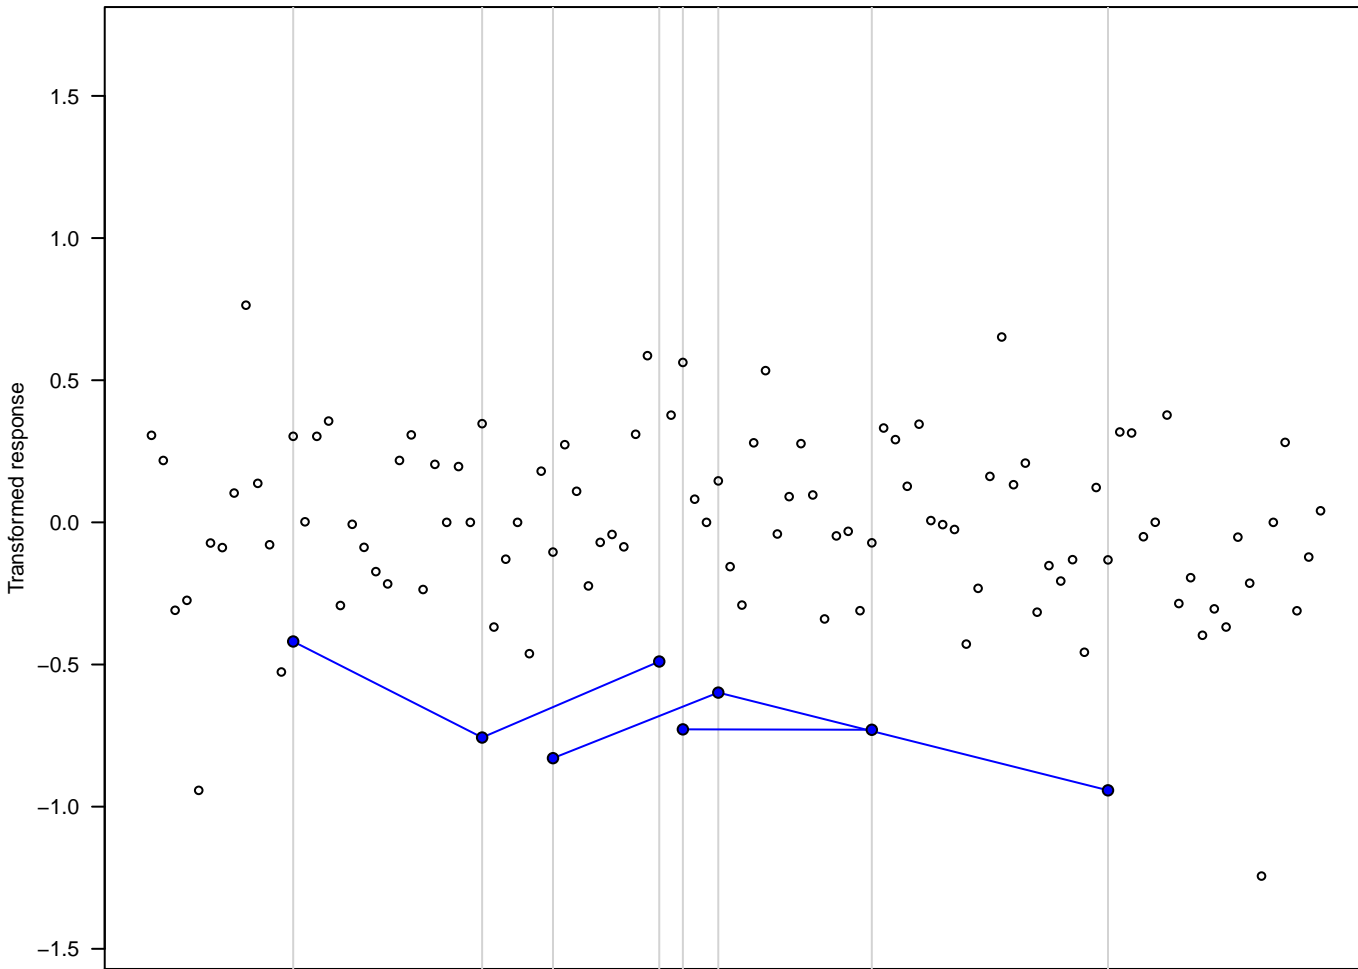

ICS

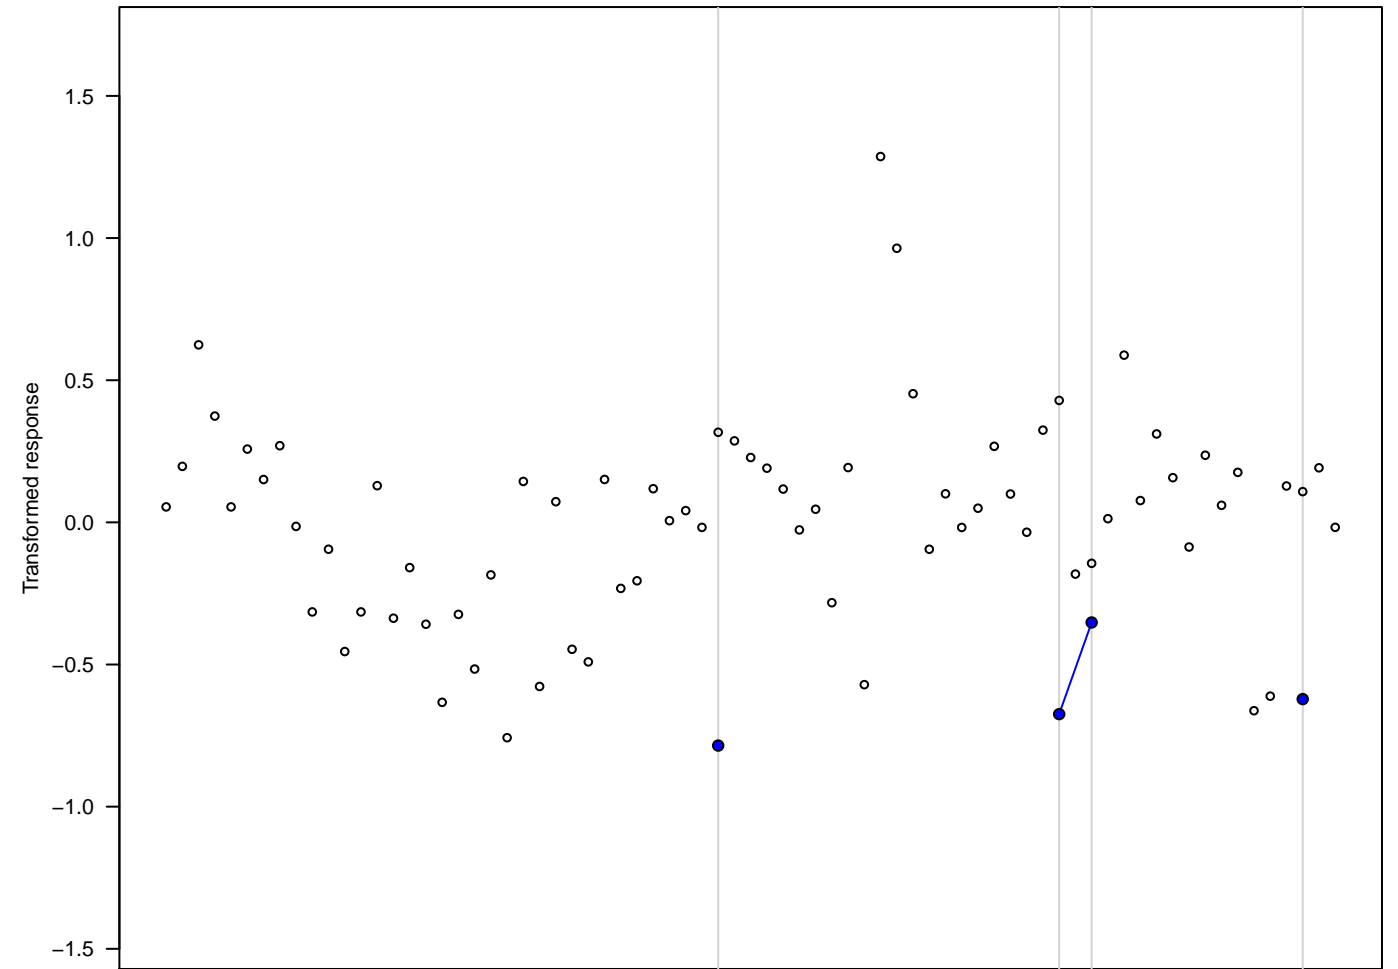

Calcium  
(Clinical Chemistry)

HMGU

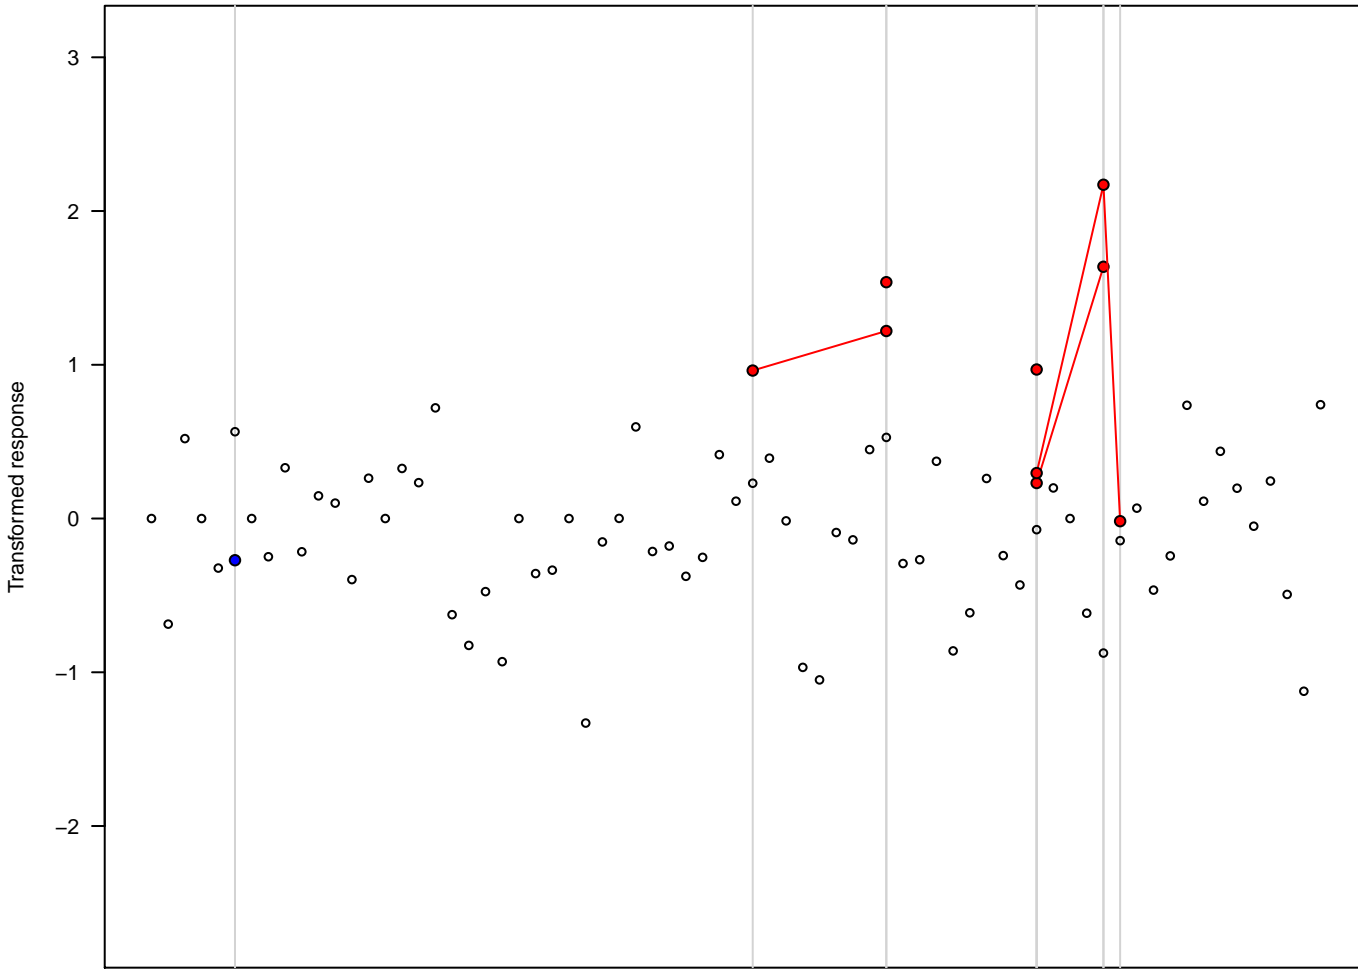

MRC Harwell

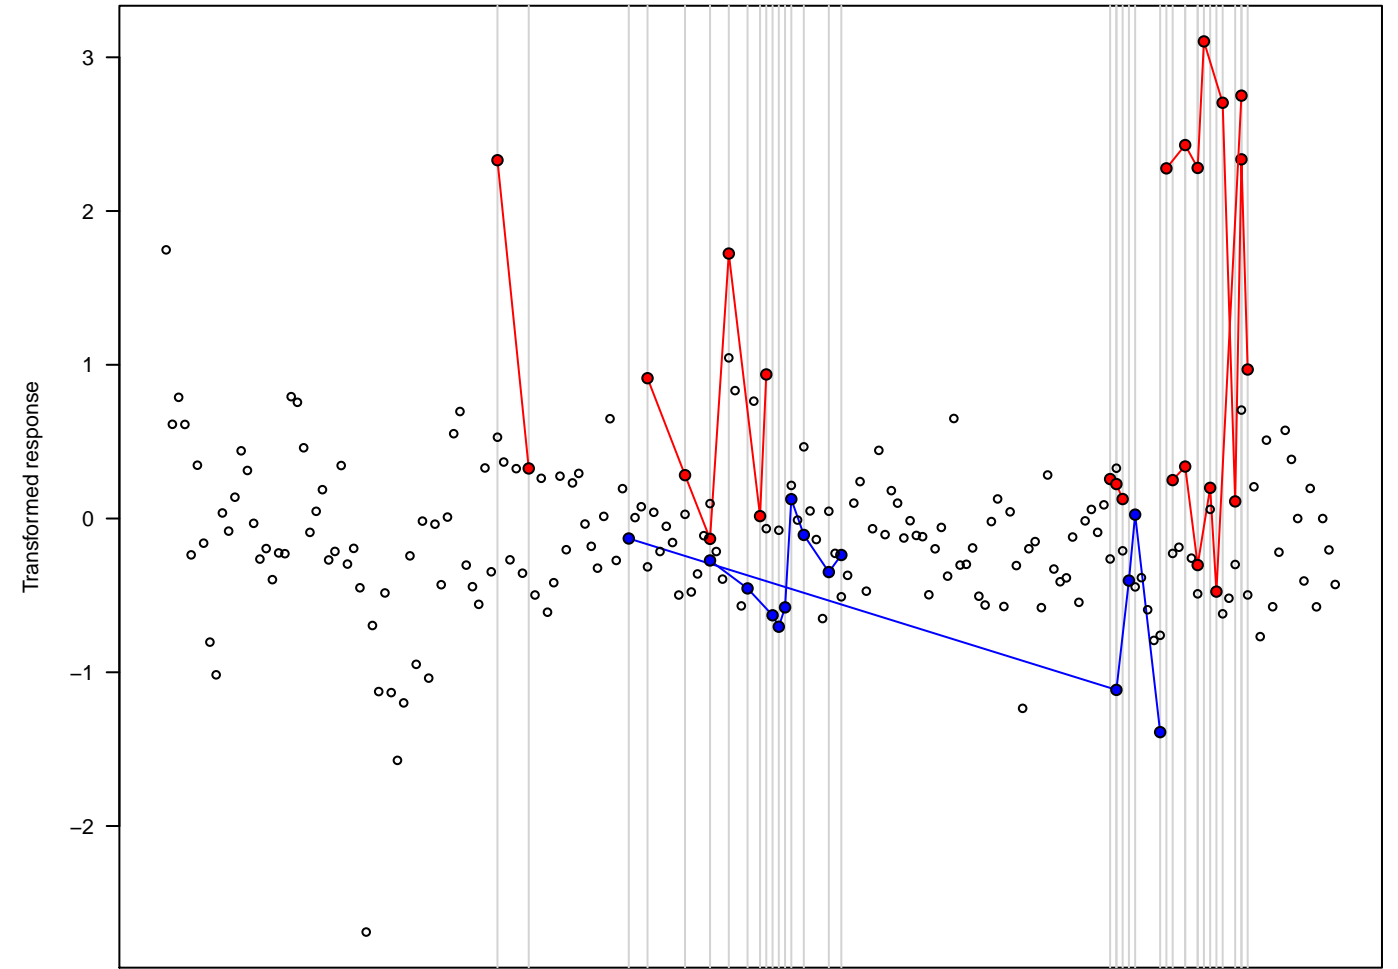

WTSI

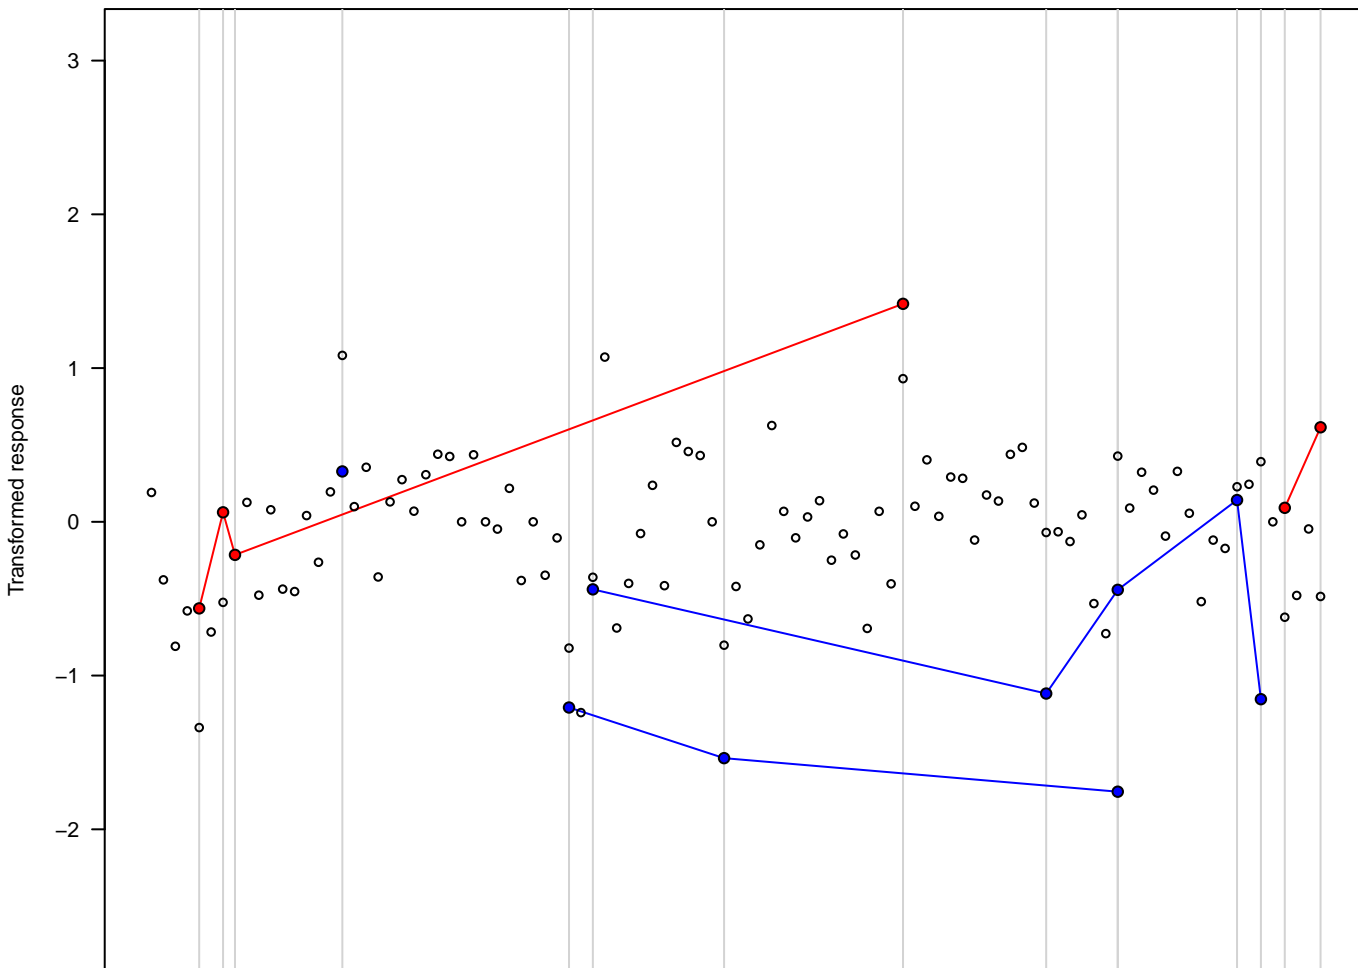

ICS

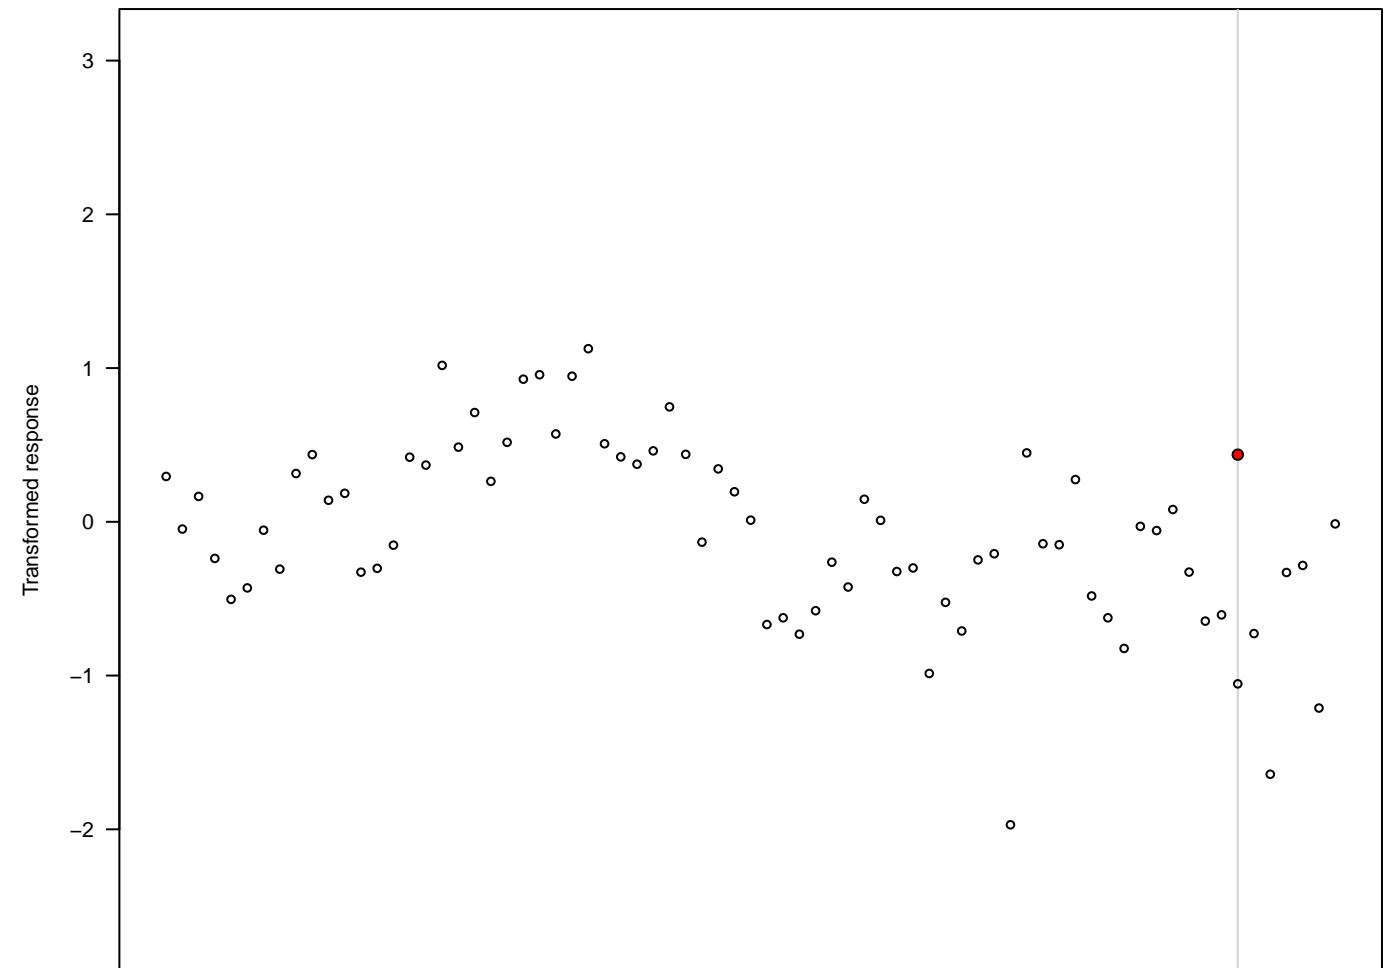

Phosphorus  
(Clinical Chemistry)

HMGU

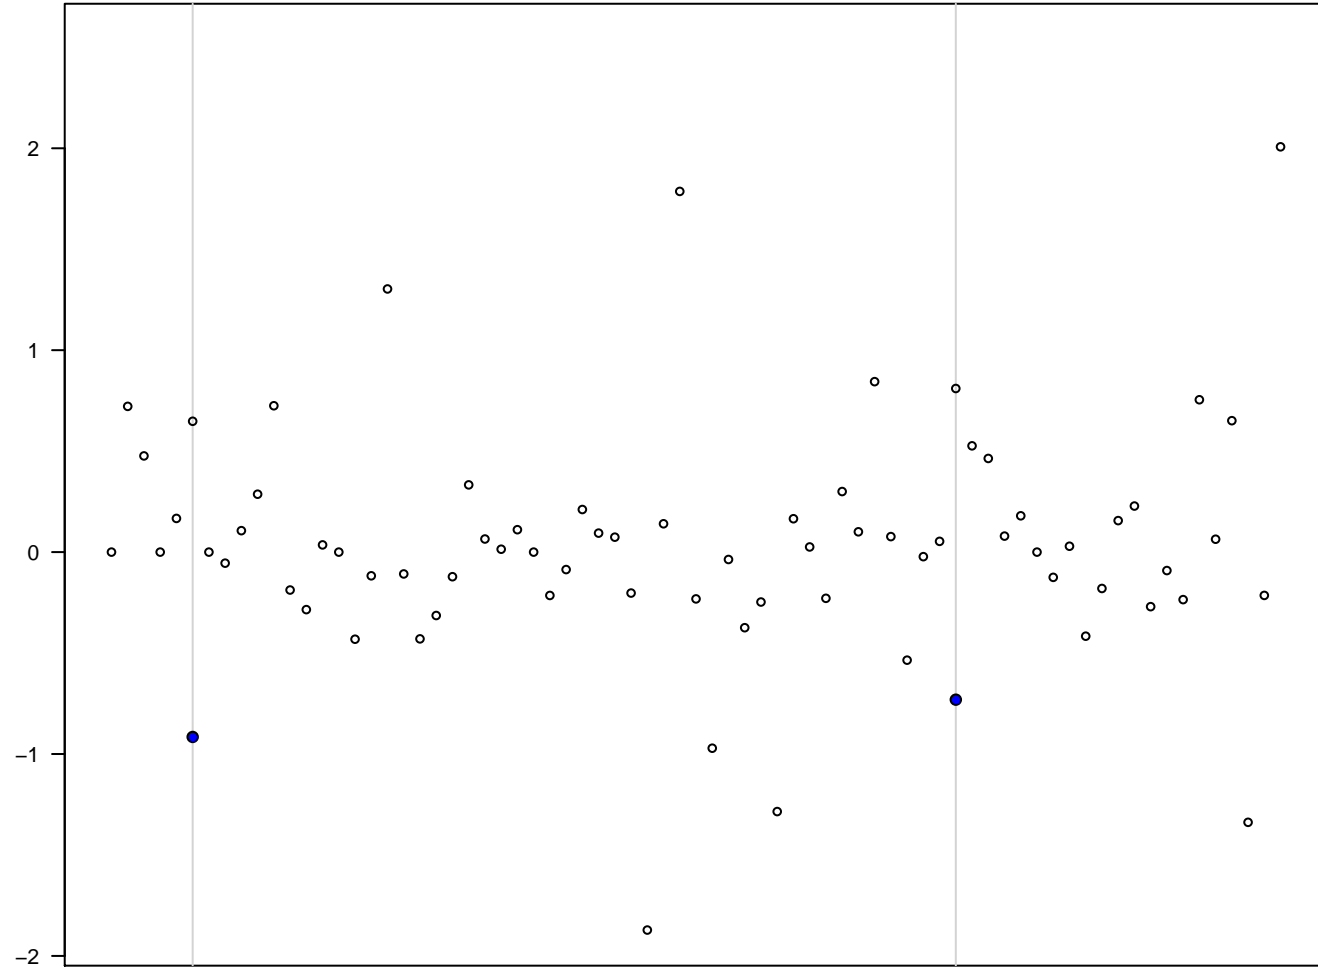

MRC Harwell

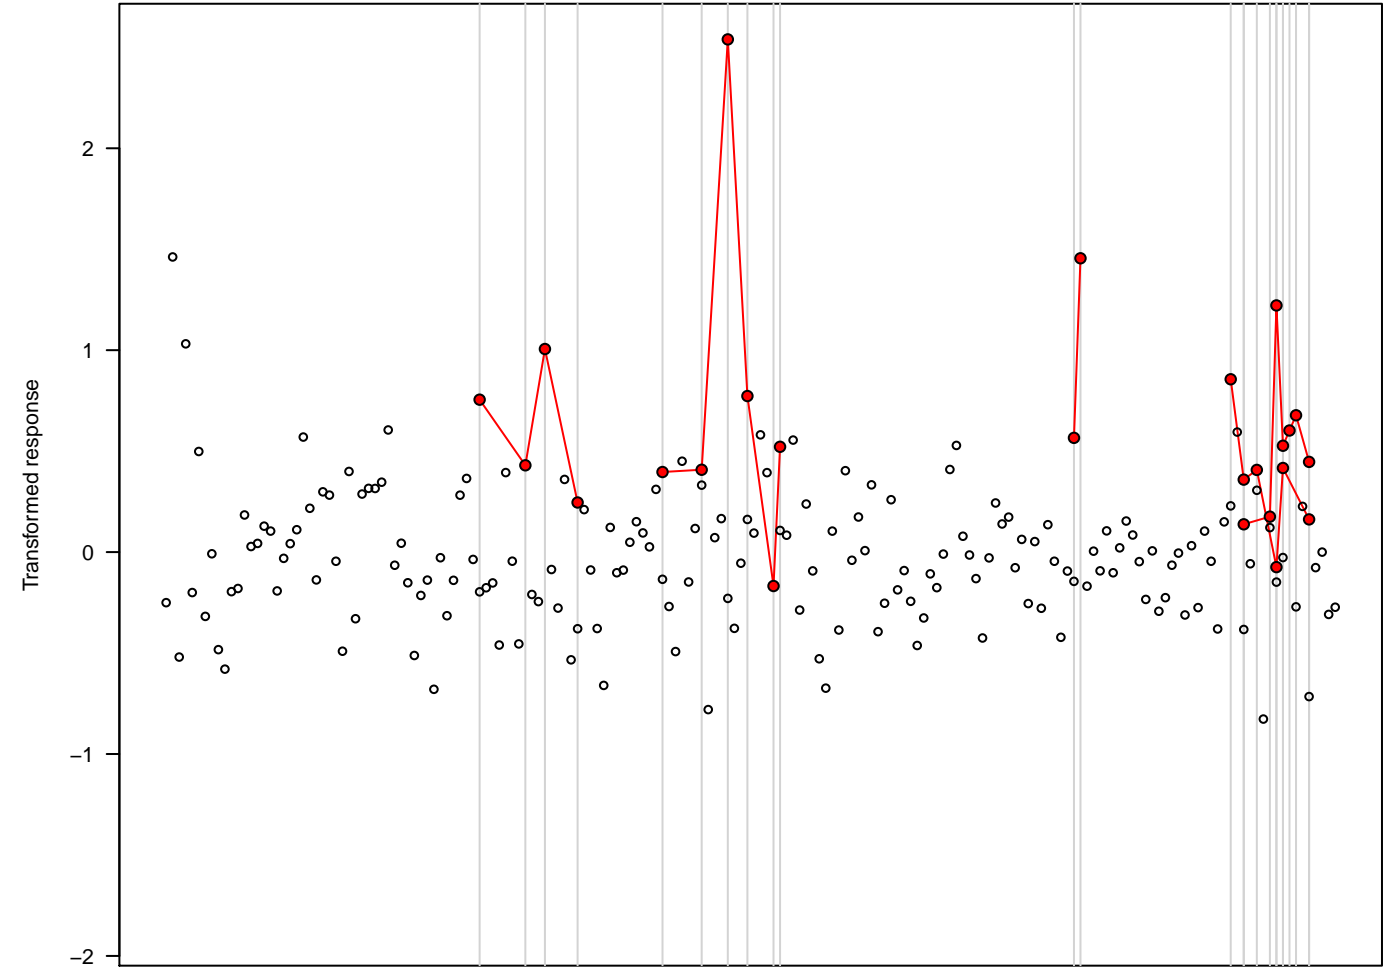

WTSI

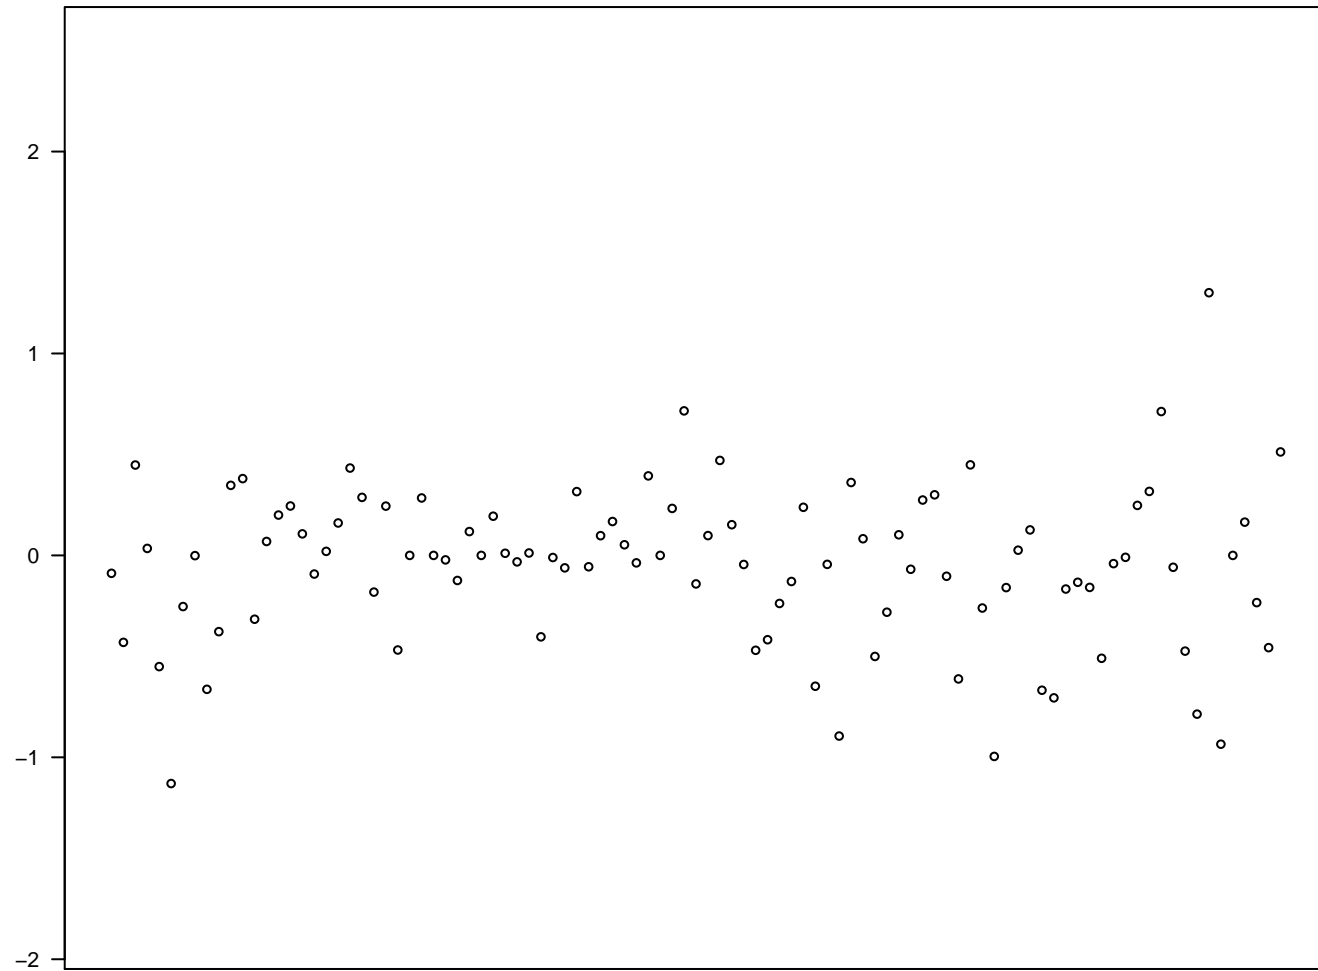

ICS

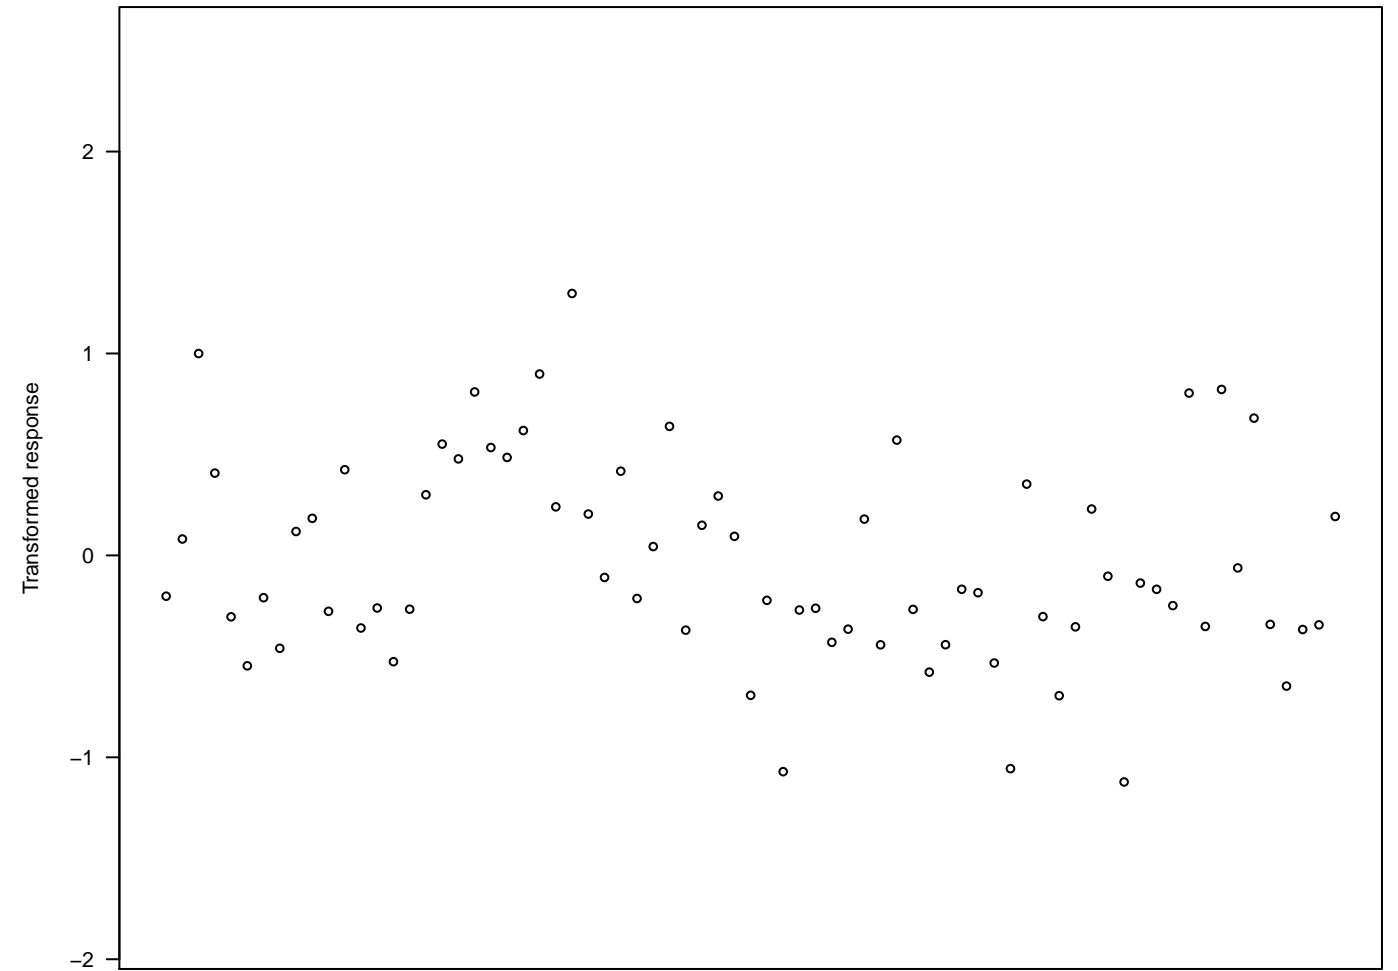

Iron  
(Clinical Chemistry)

HMGU

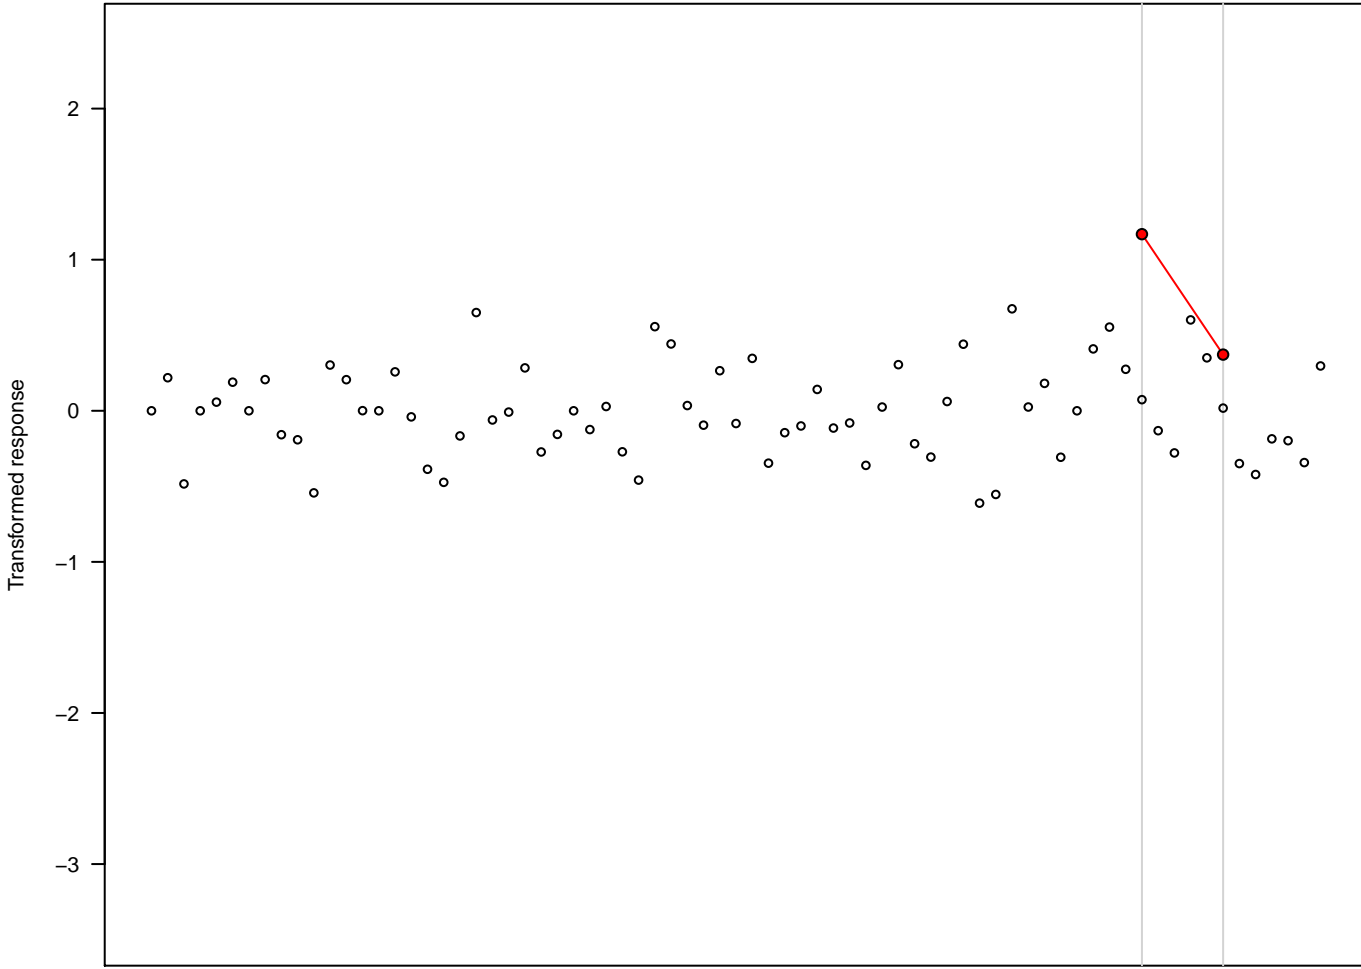

MRC Harwell

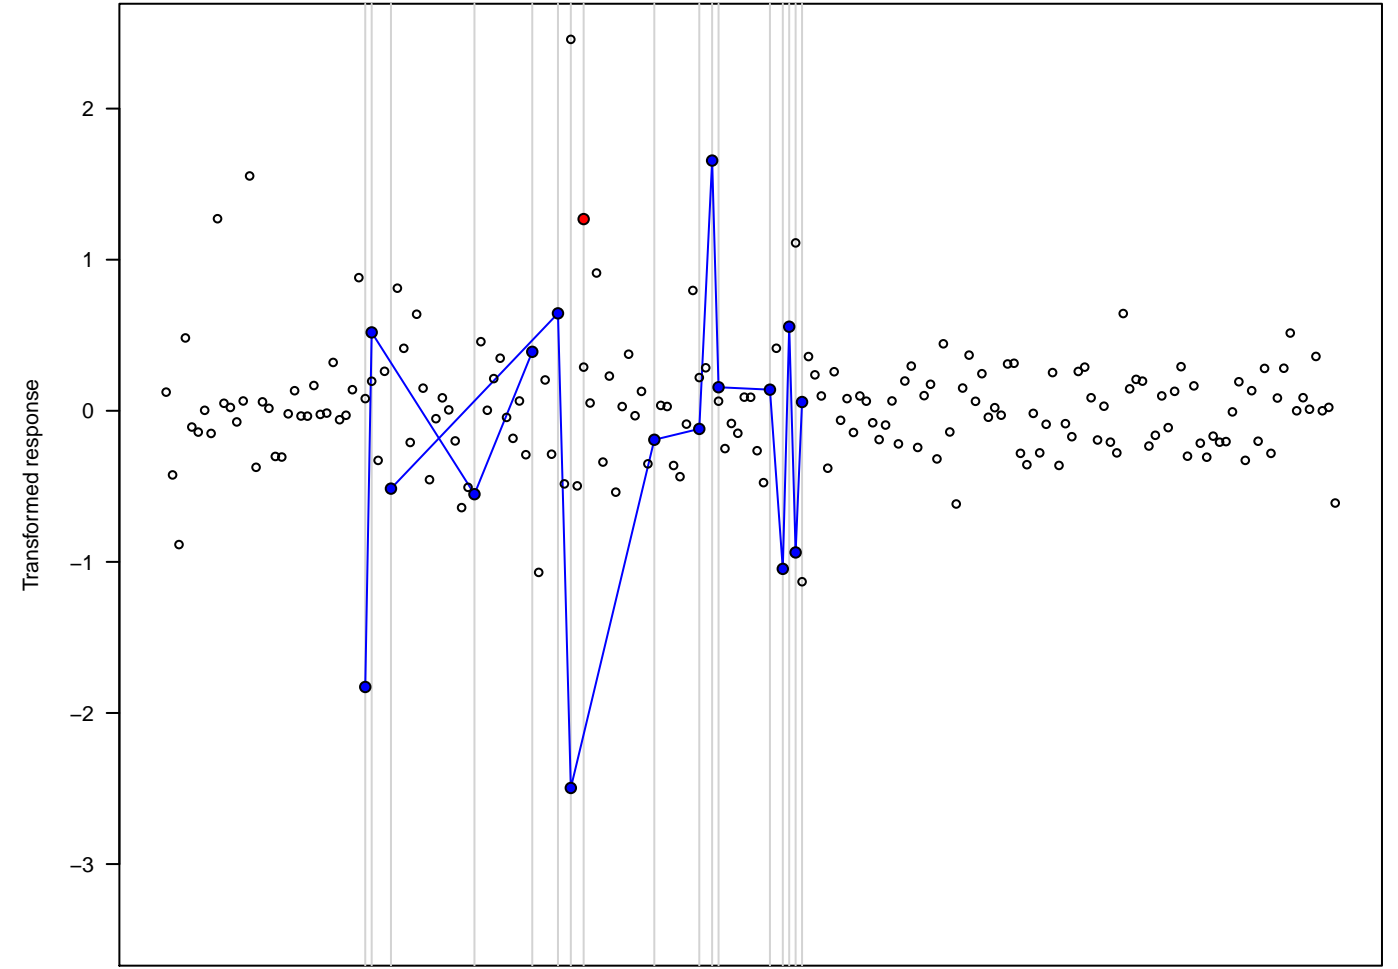

WTSI

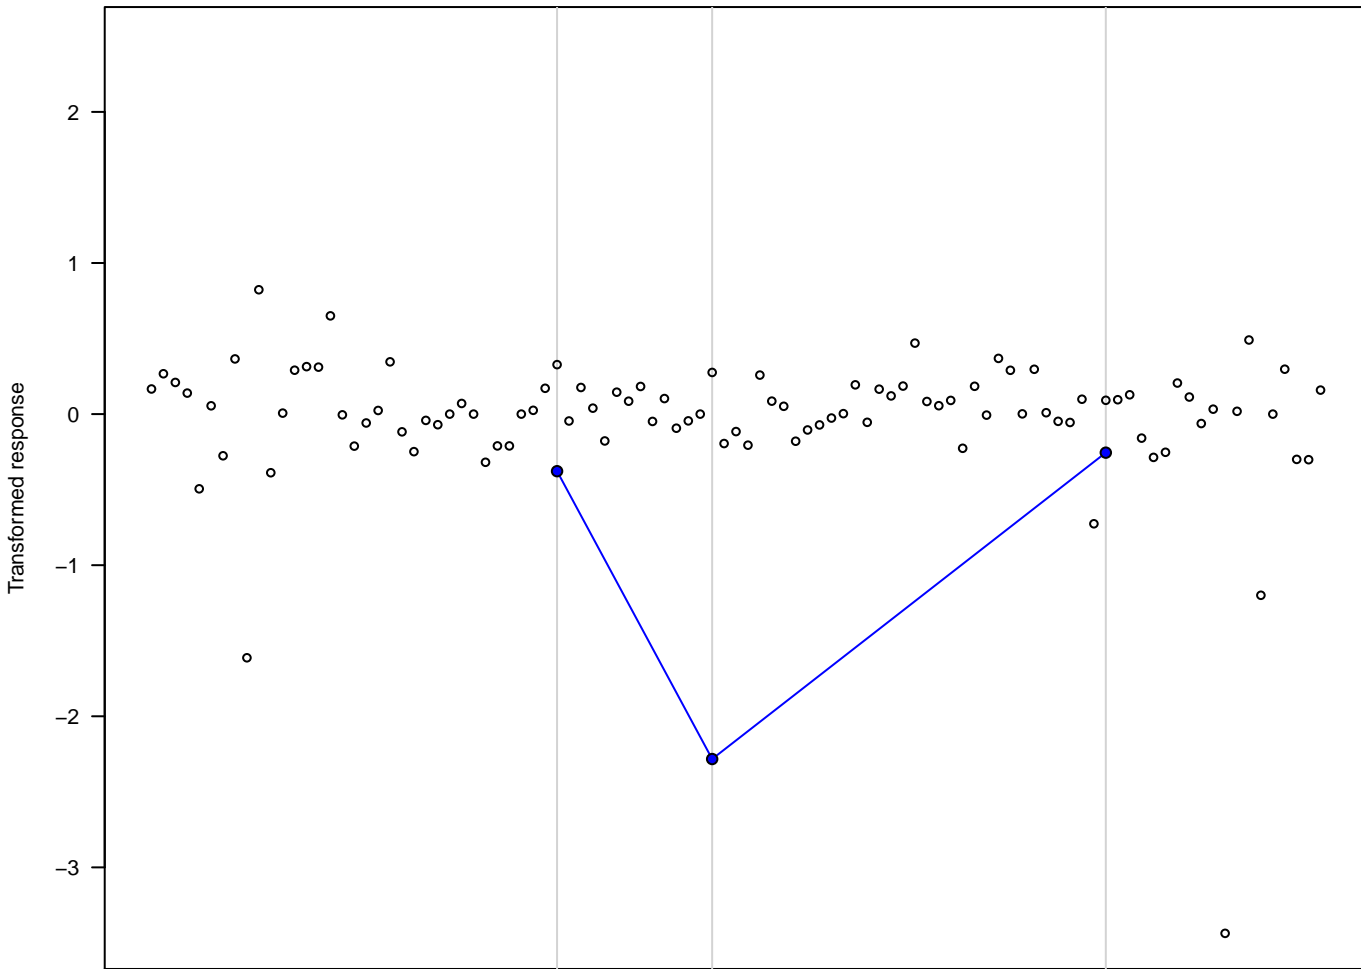

ICS

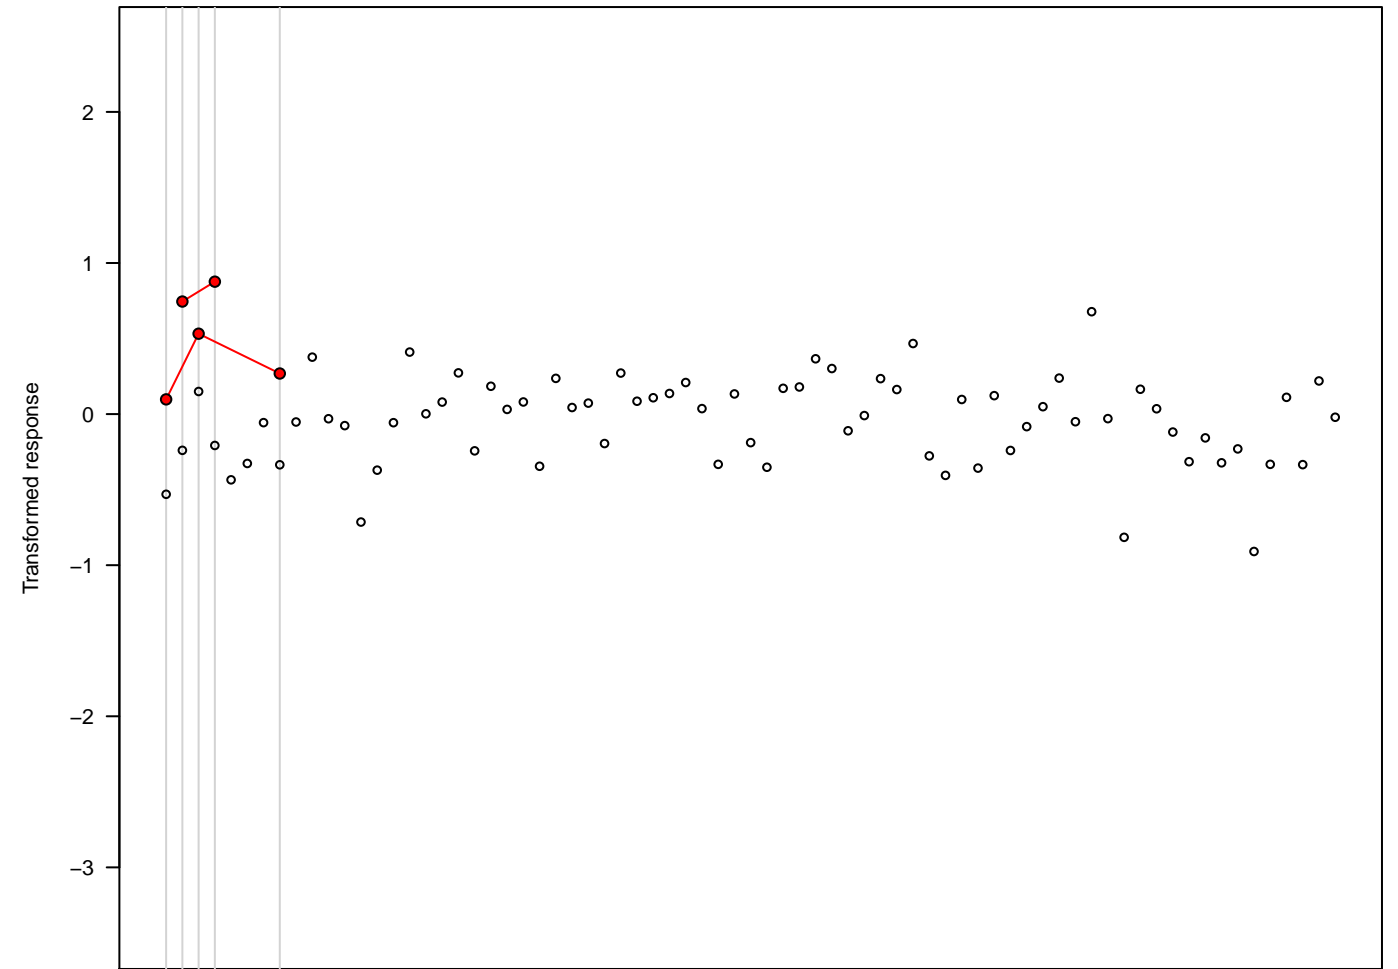



Lactate dehydrogenase  
(Clinical Chemistry)

HMGU

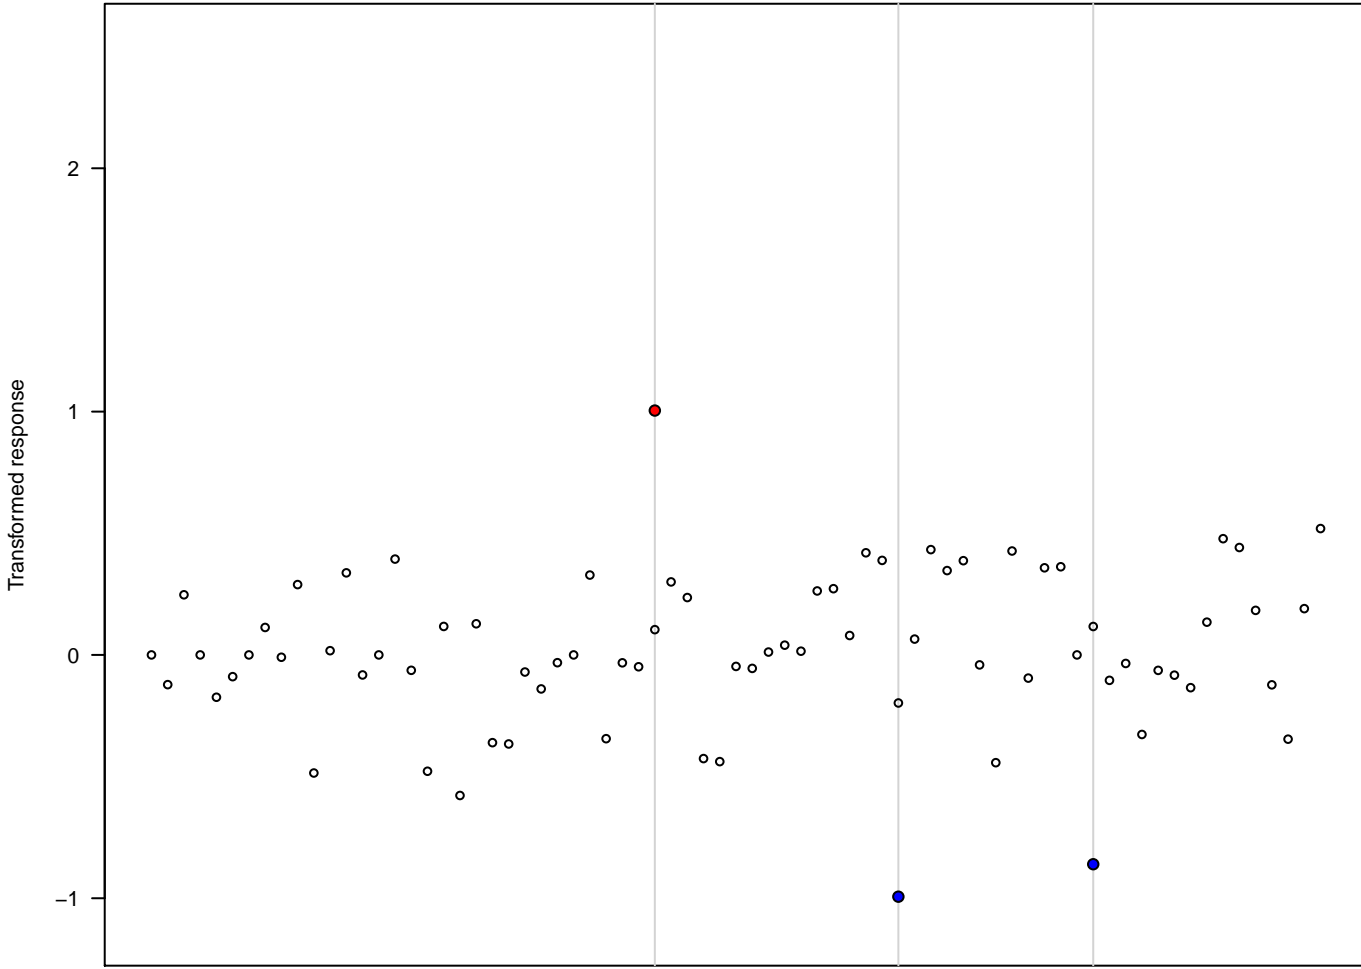

MRC Harwell

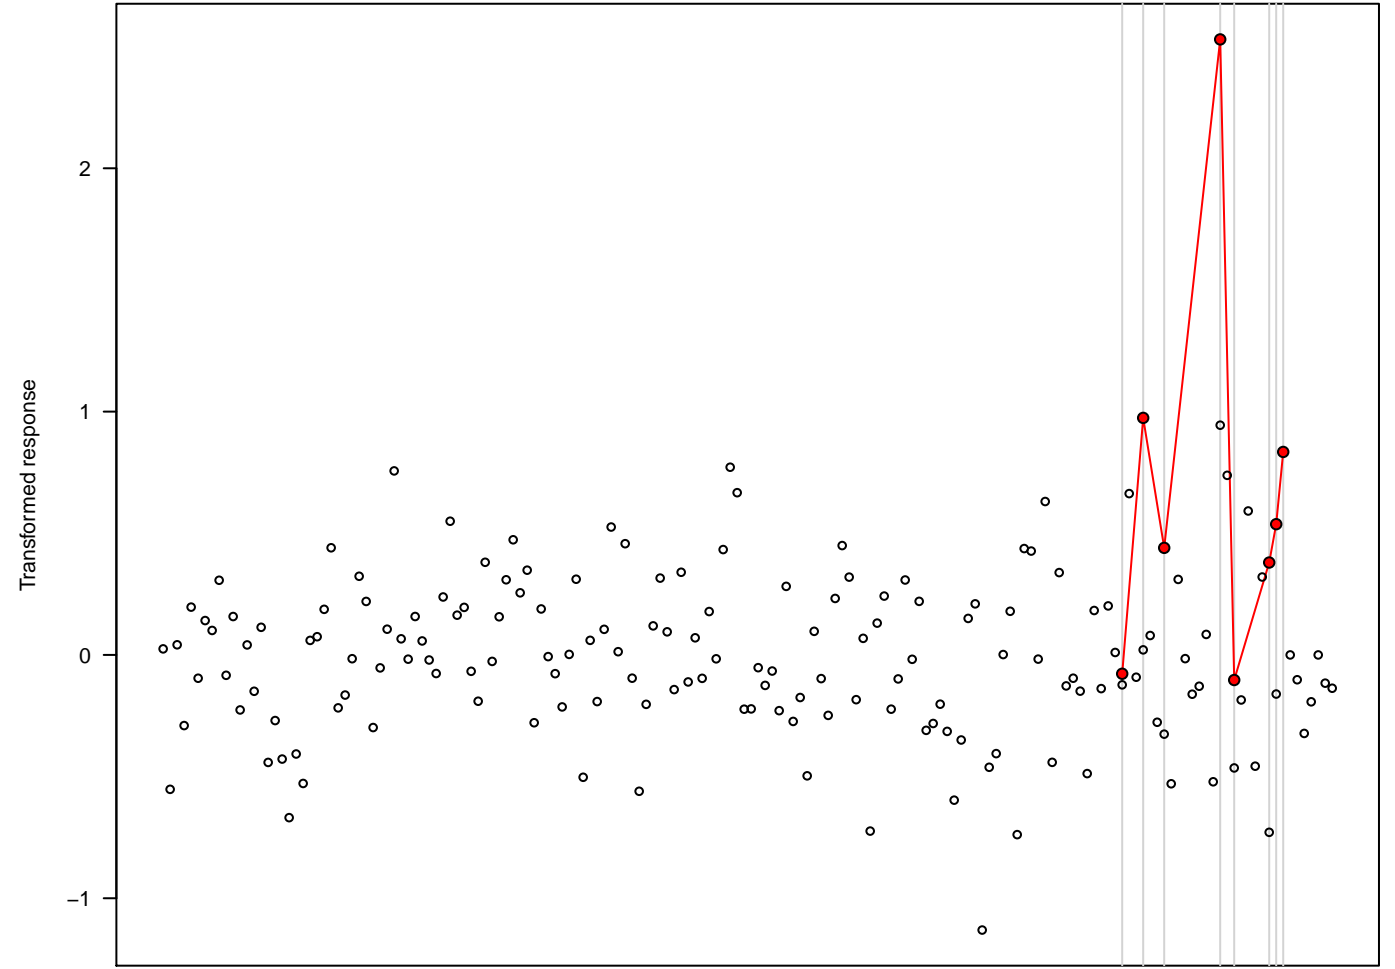

WTSI

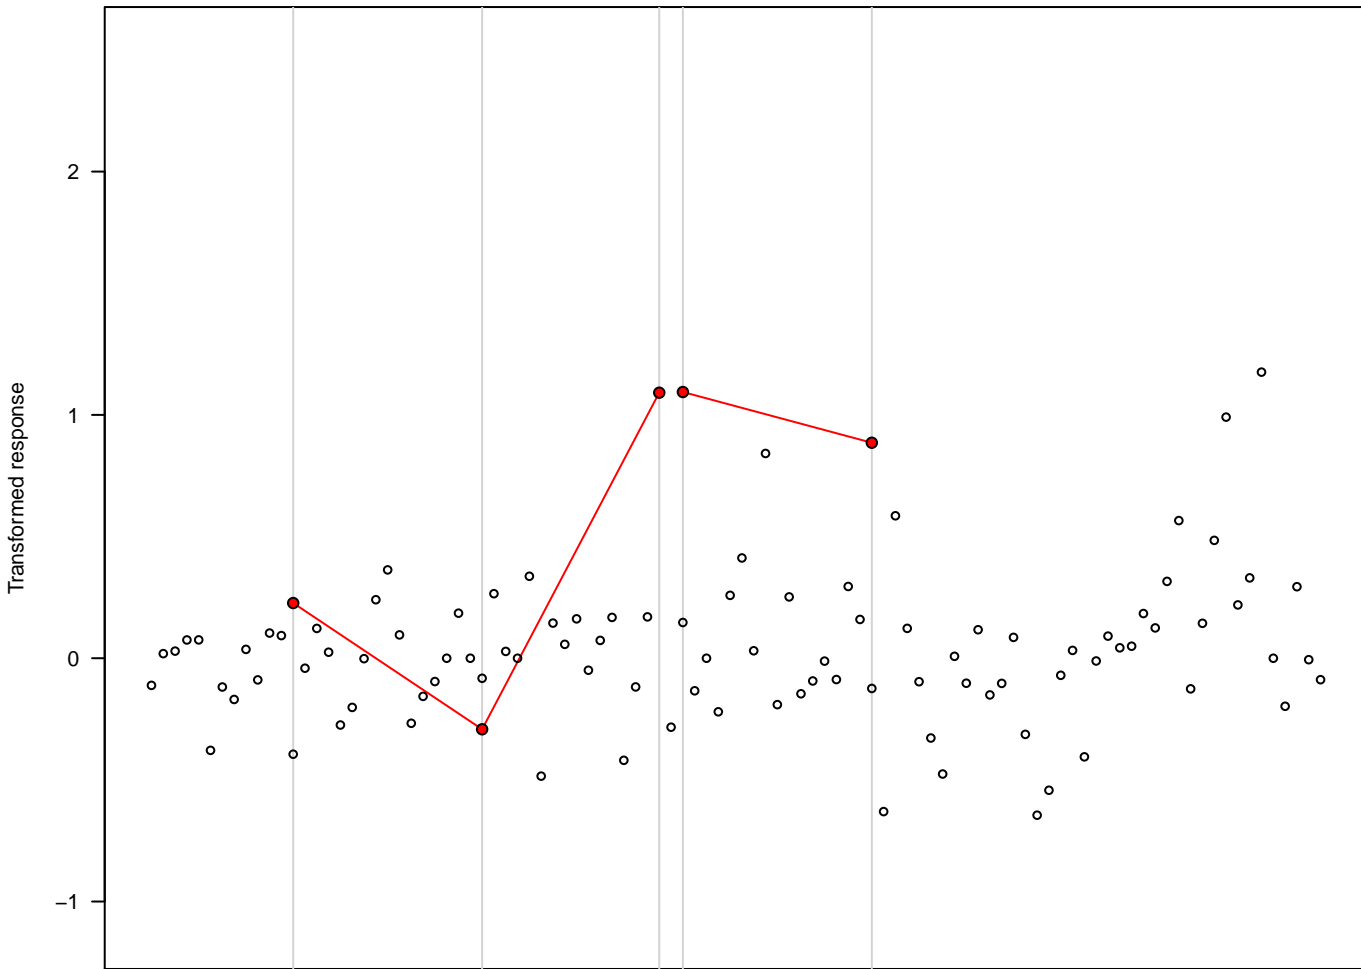

ICS

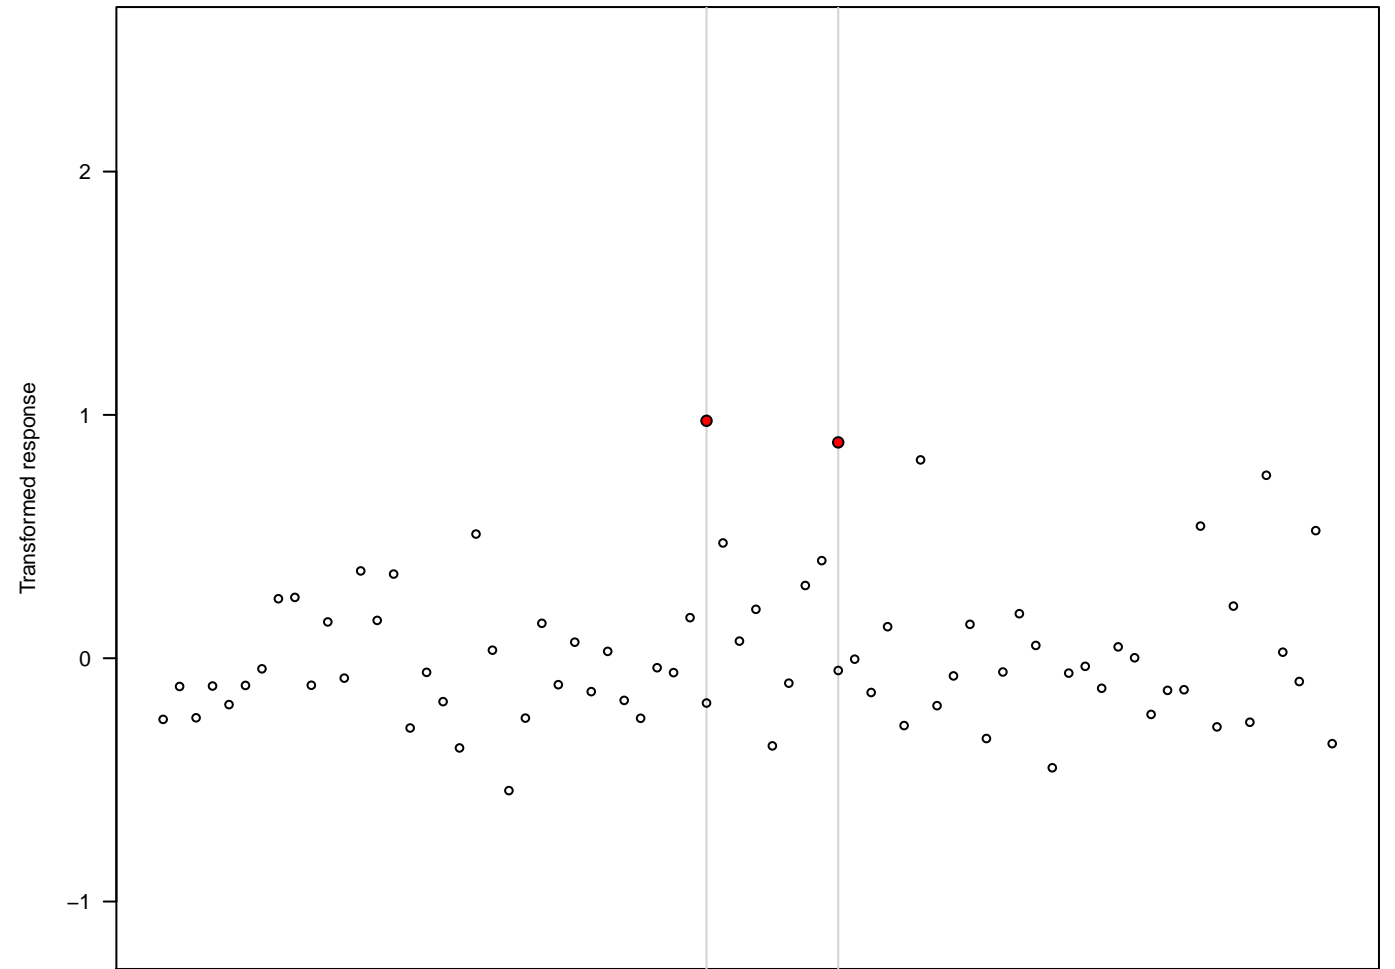

Aspartate aminotransferase  
(Clinical Chemistry)

HMGU

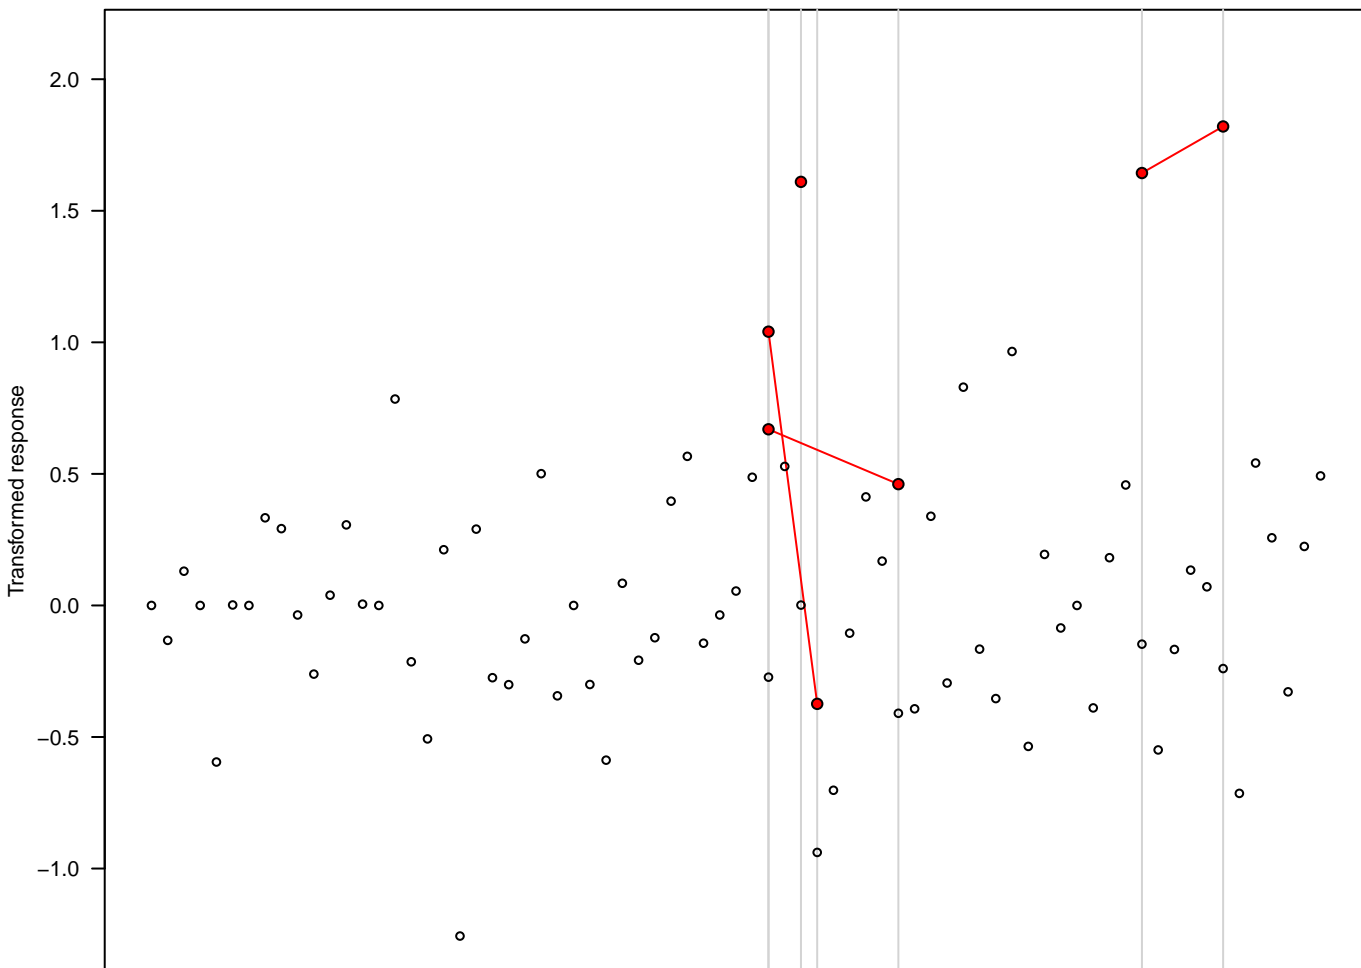

MRC Harwell

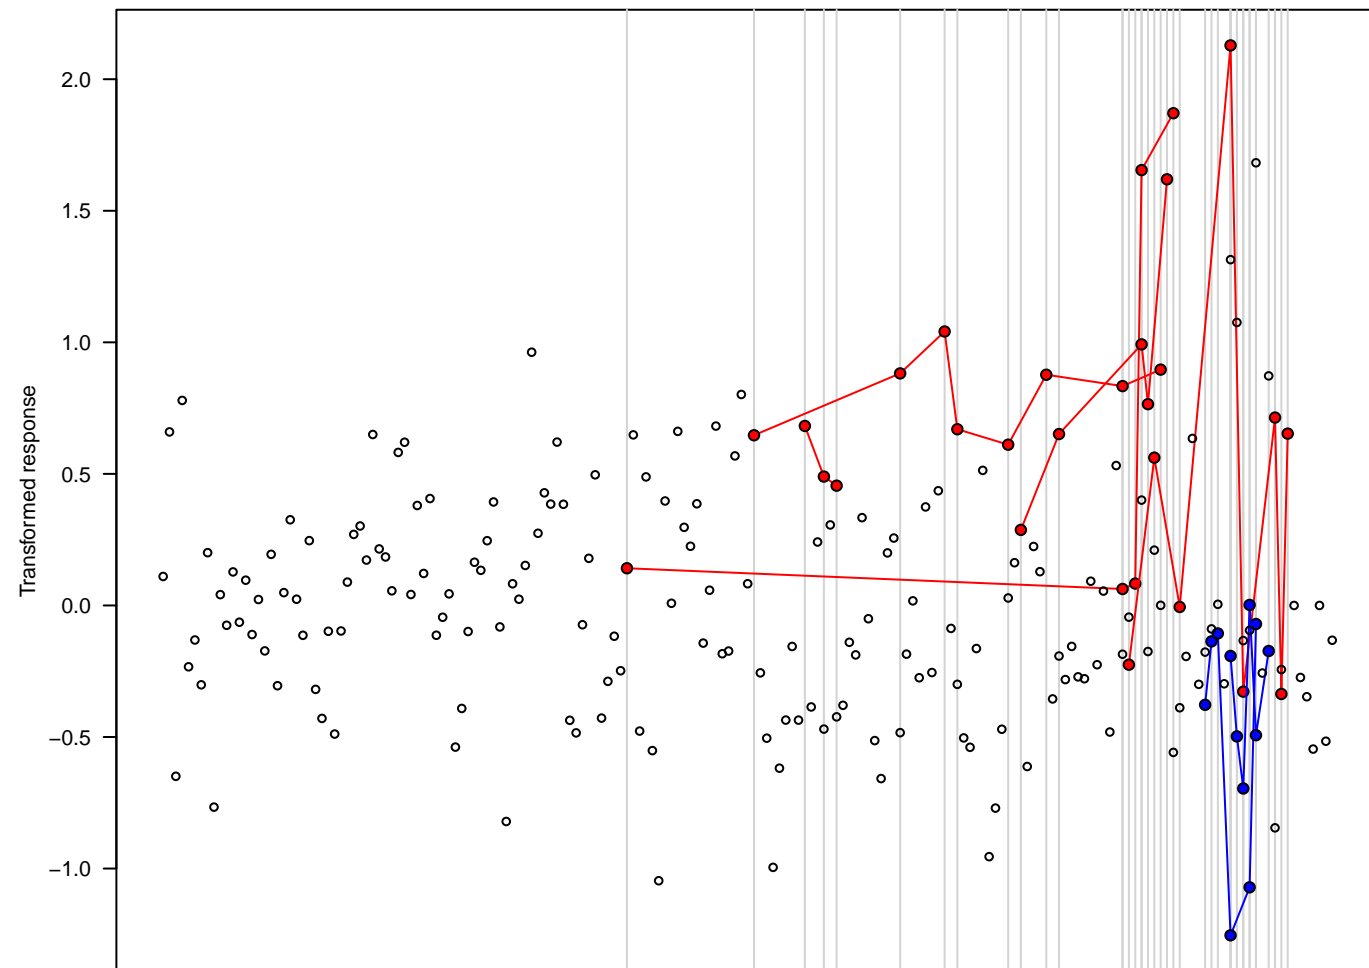

WTSI

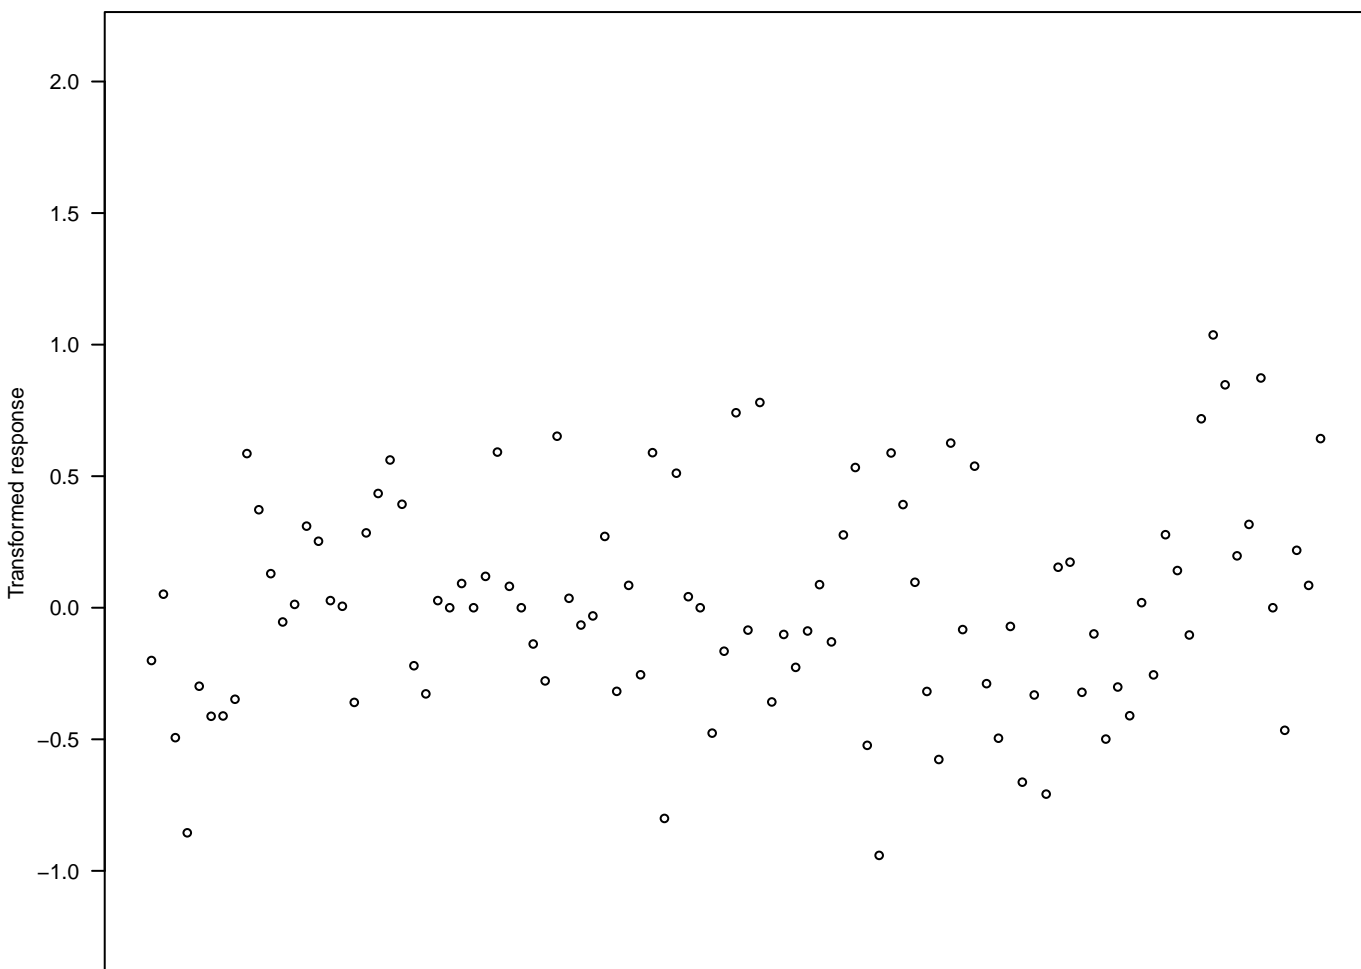

ICS

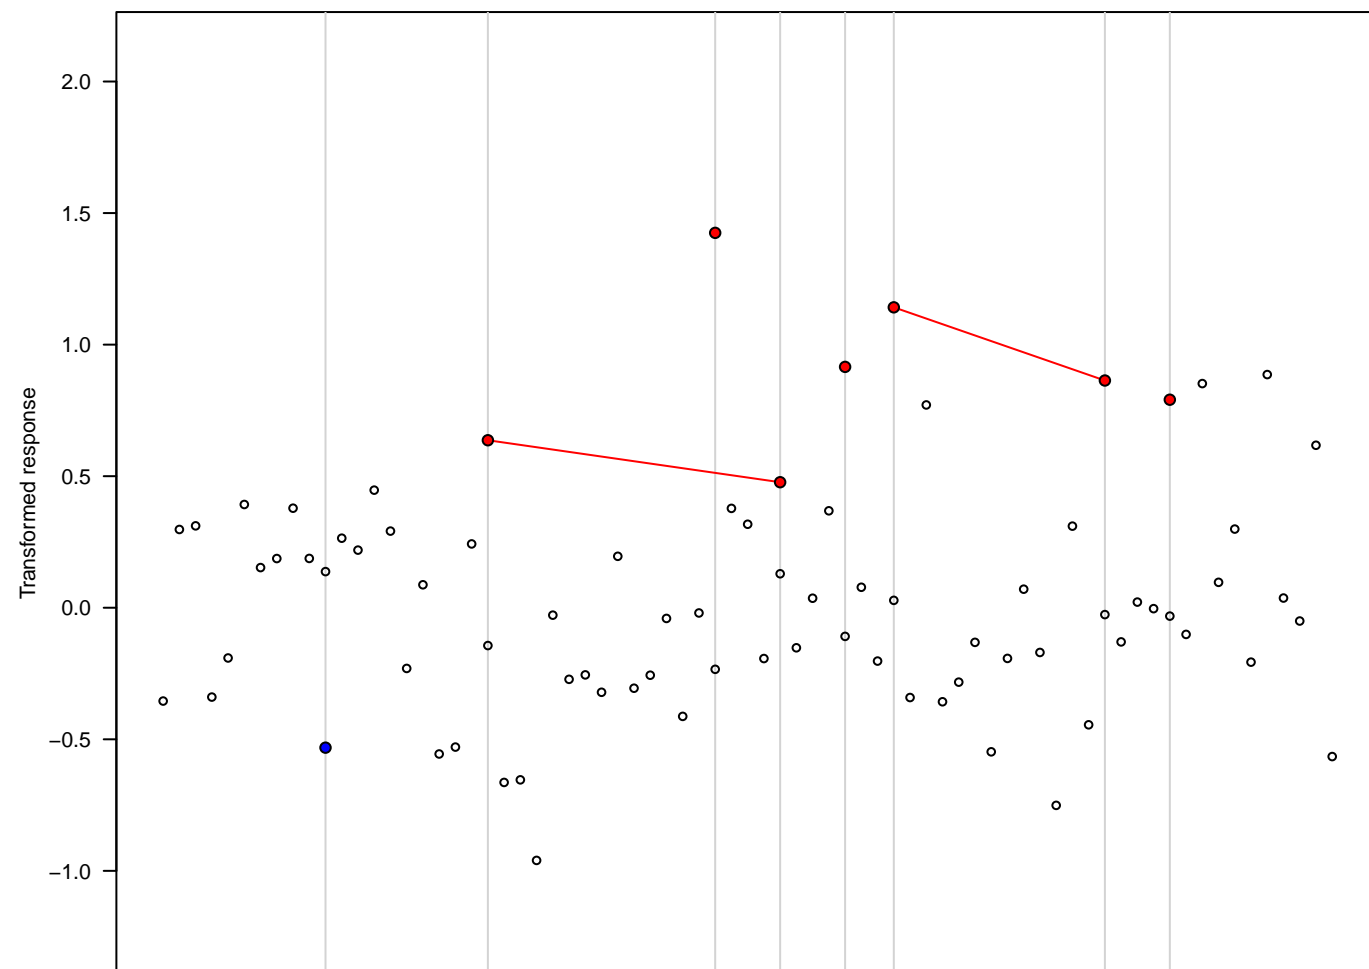

Alanine aminotransferase  
(Clinical Chemistry)

HMGU

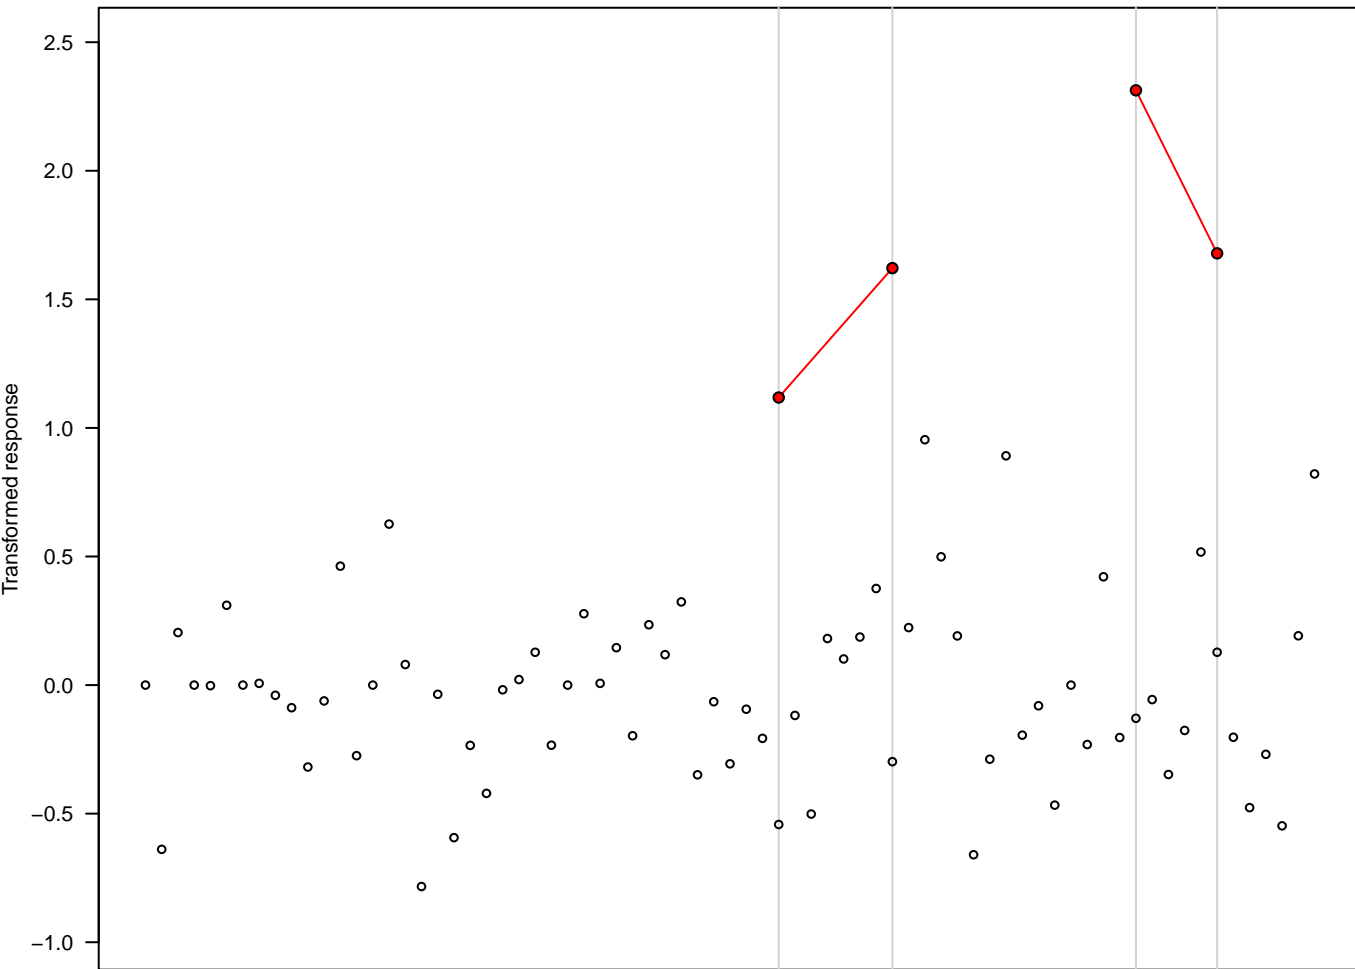

MRC Harwell

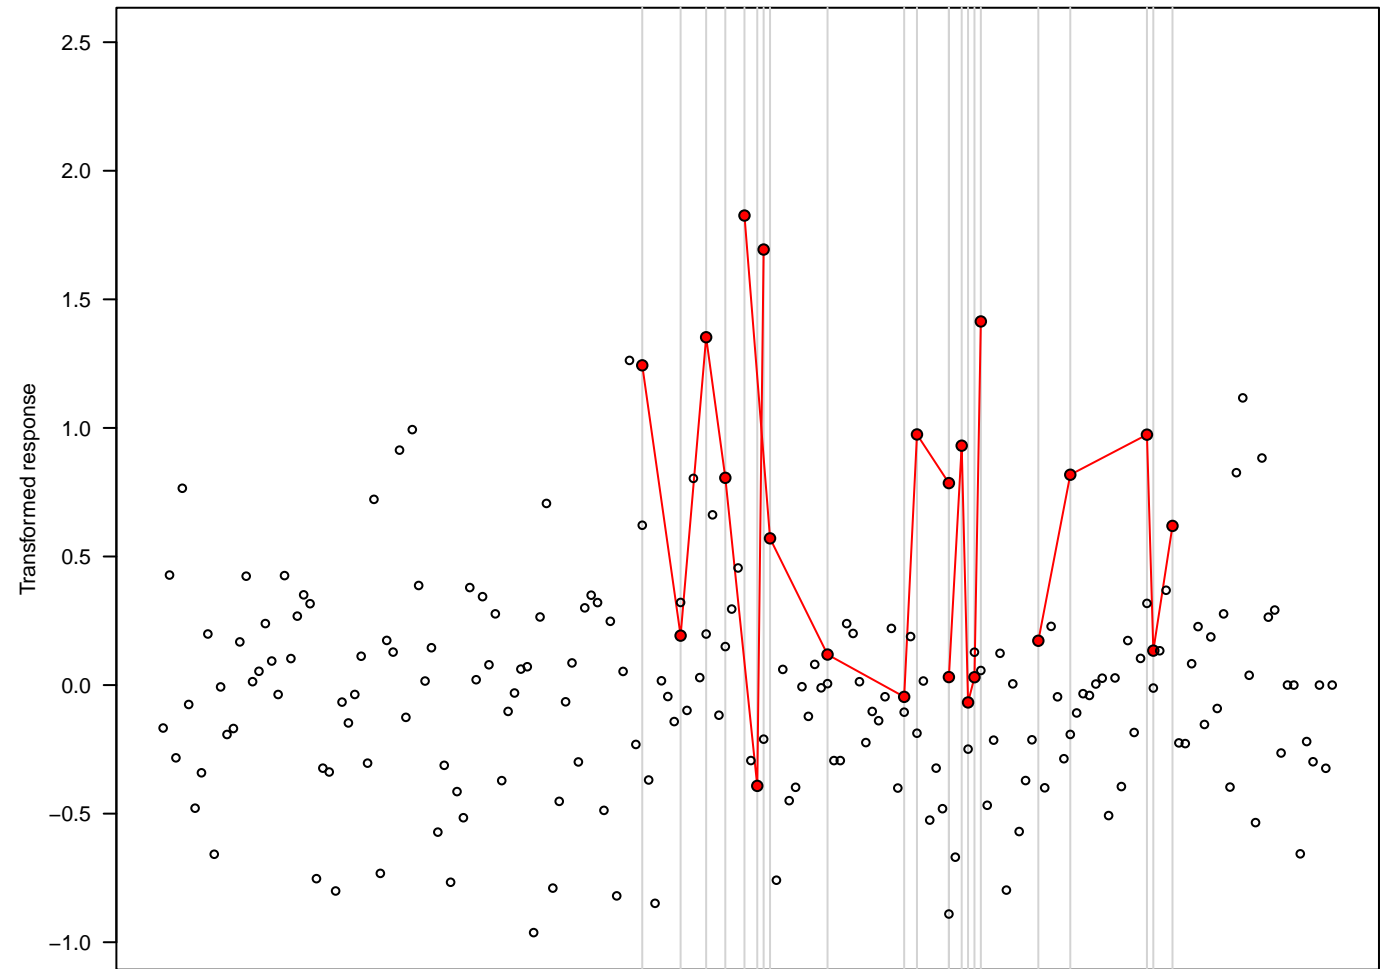

WTSI

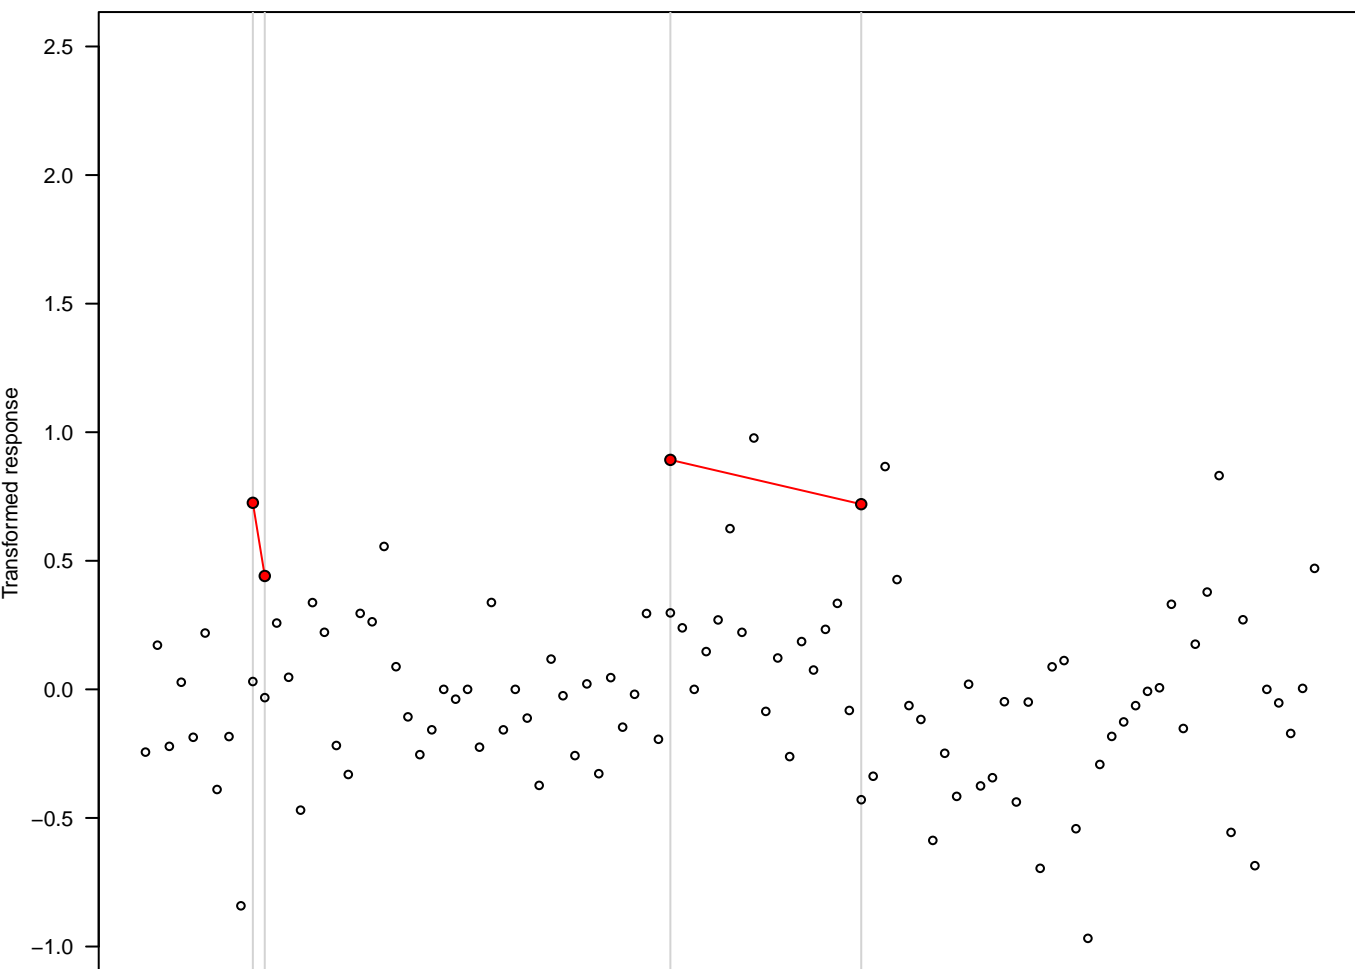

ICS

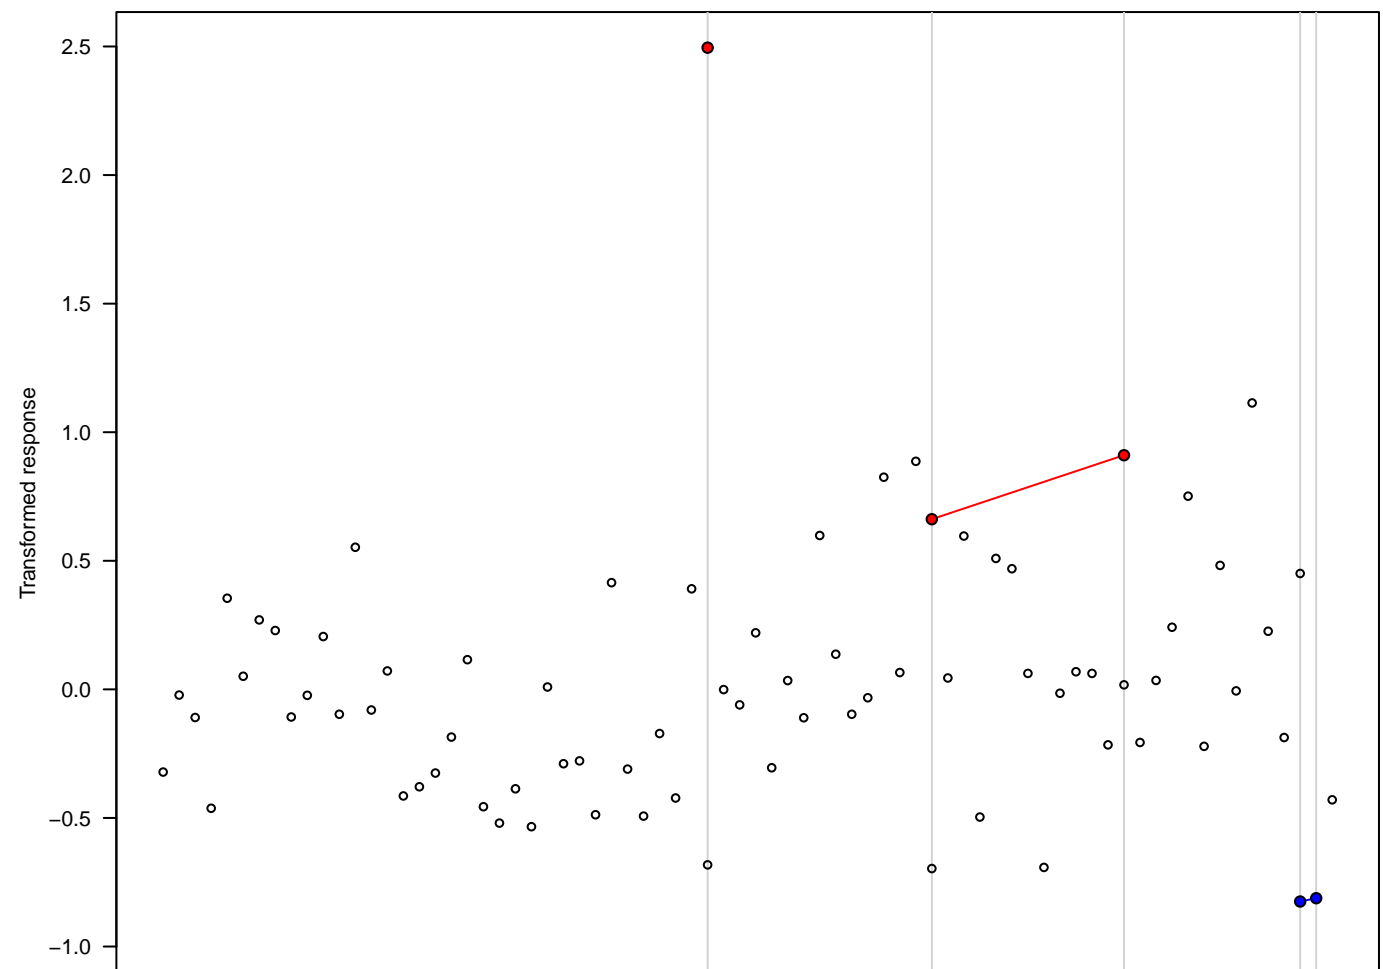

Alkaline phosphatase  
(Clinical Chemistry)

HMGU

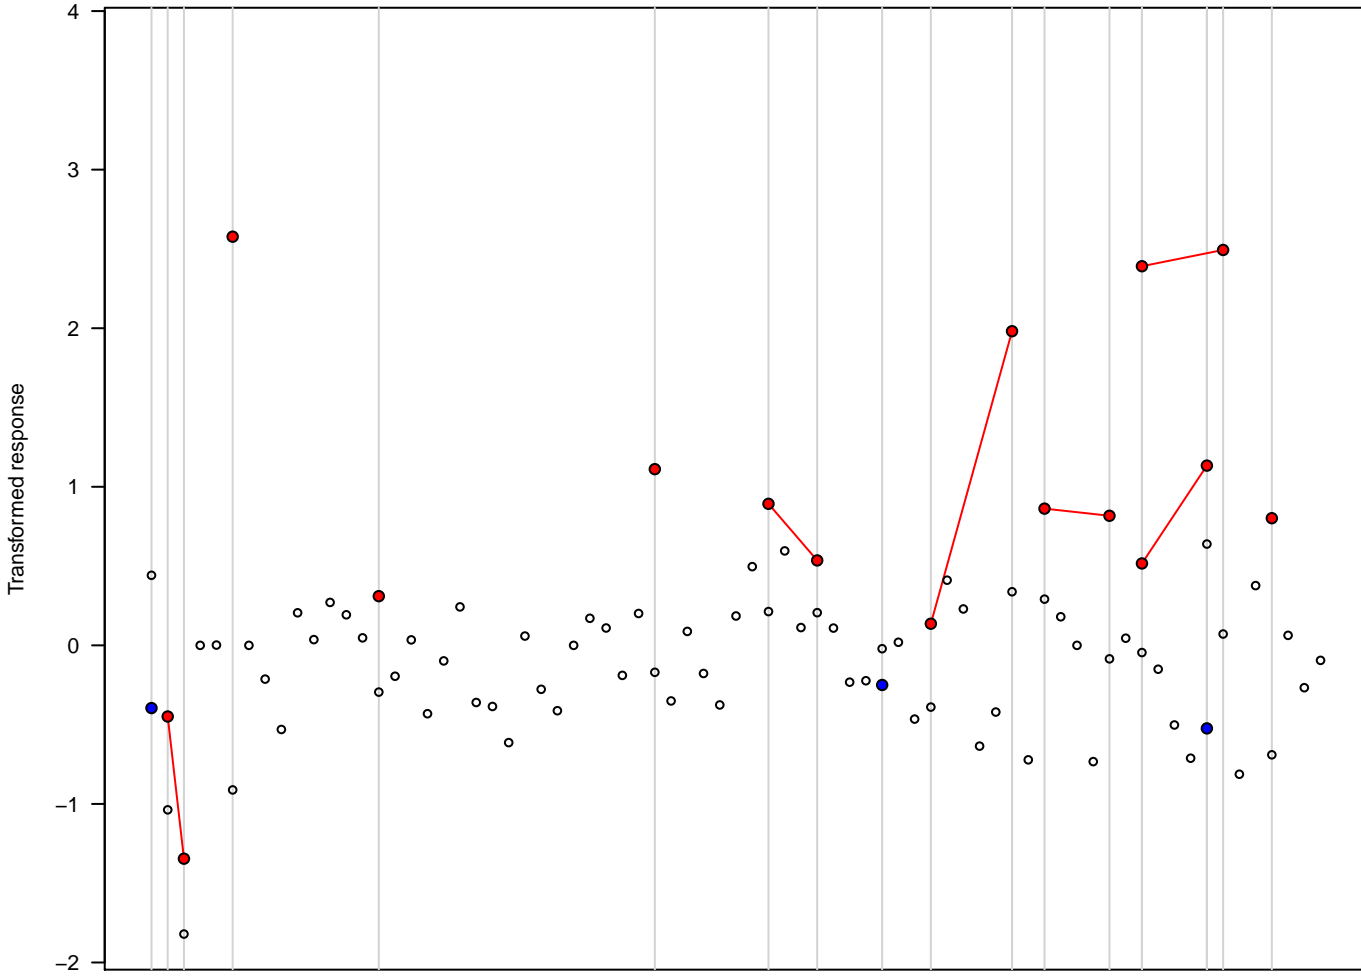

MRC Harwell

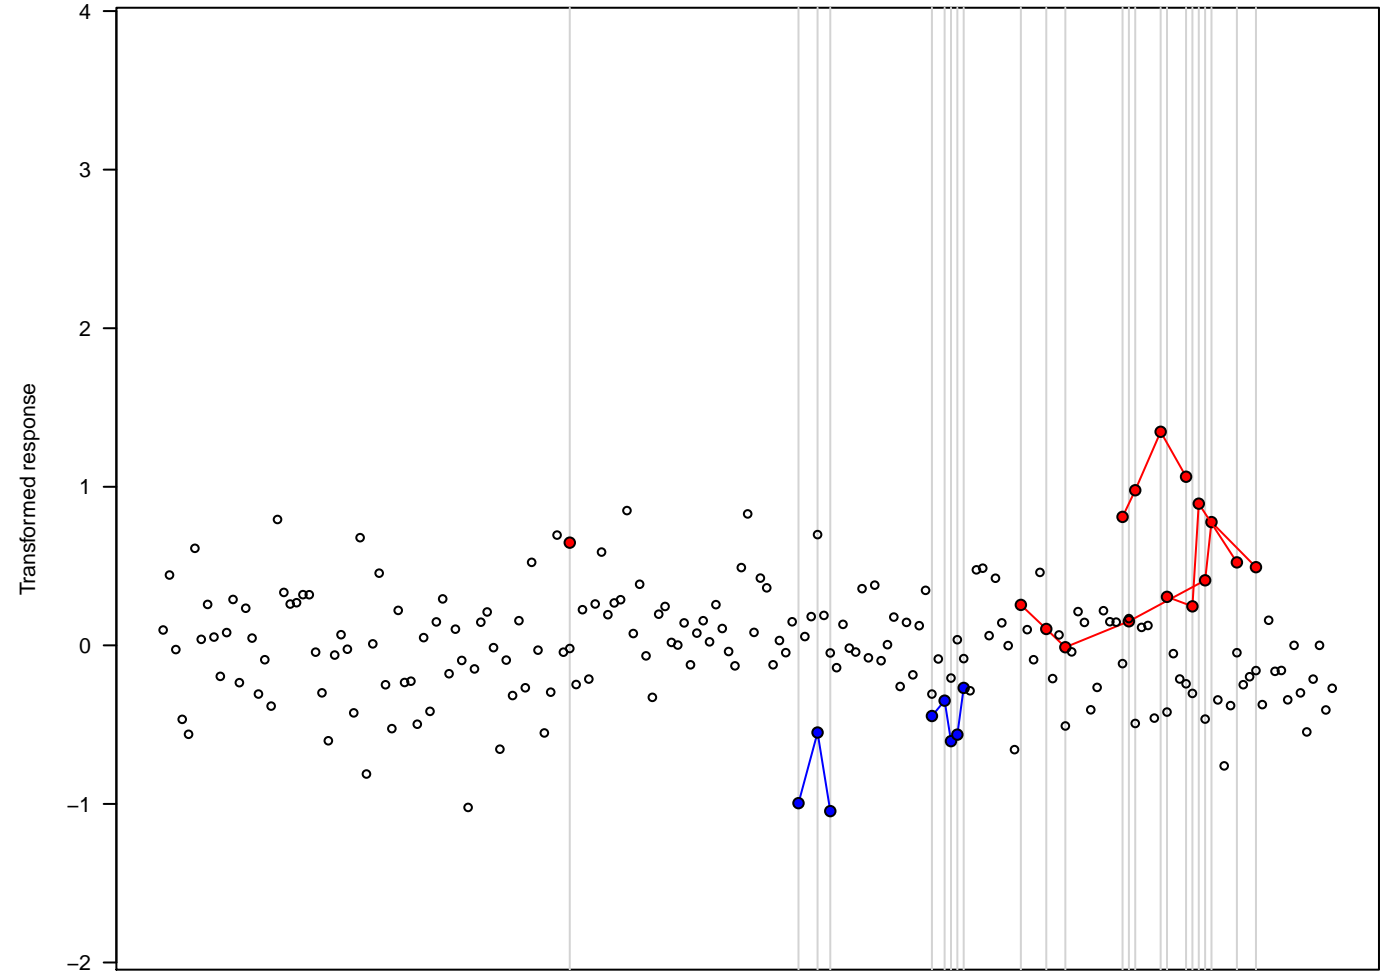

WTSI

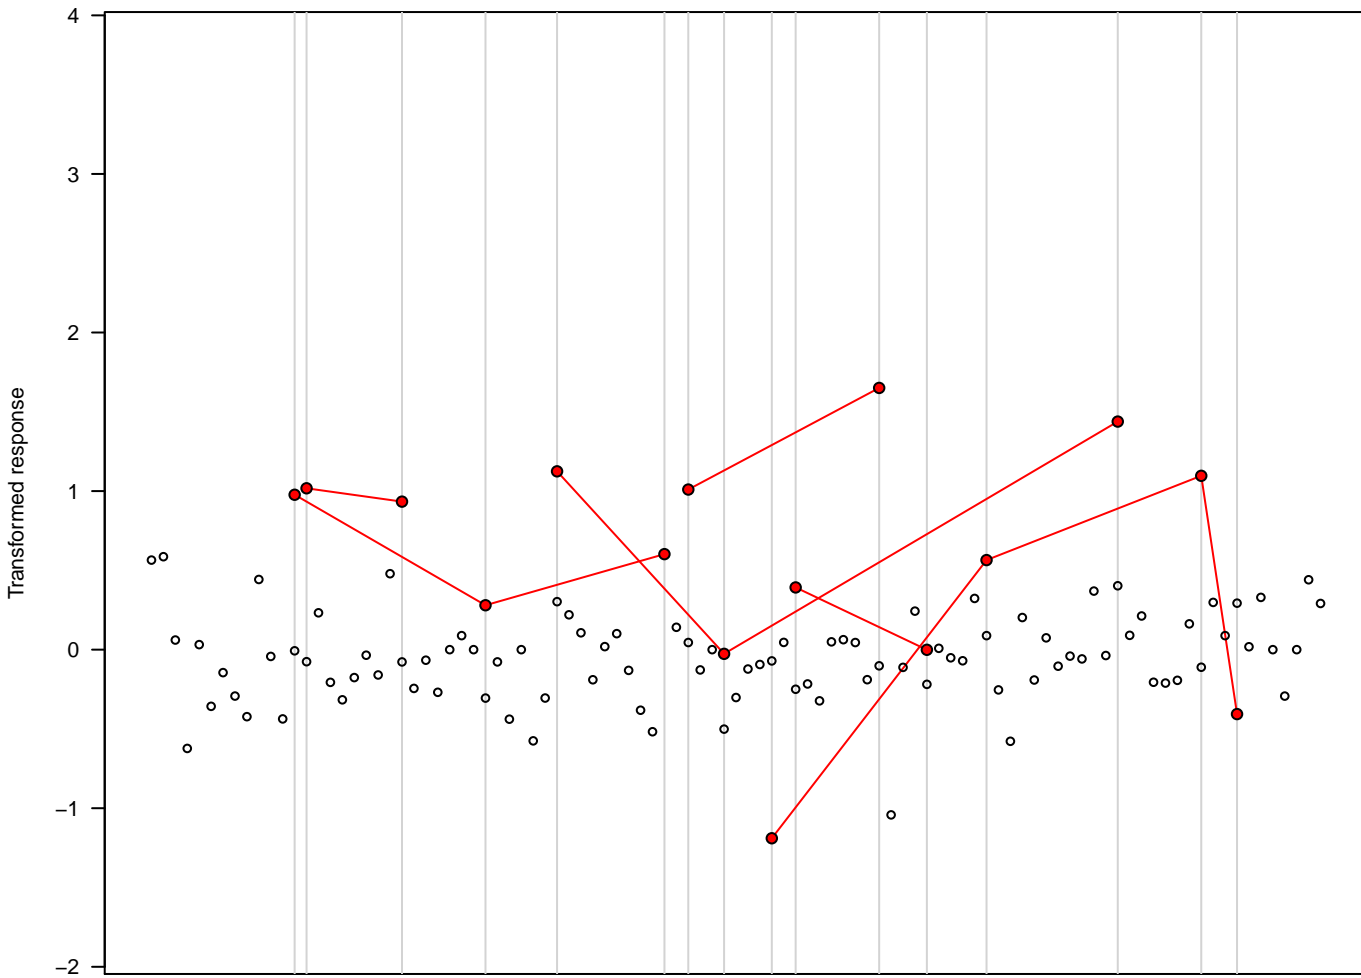

ICS

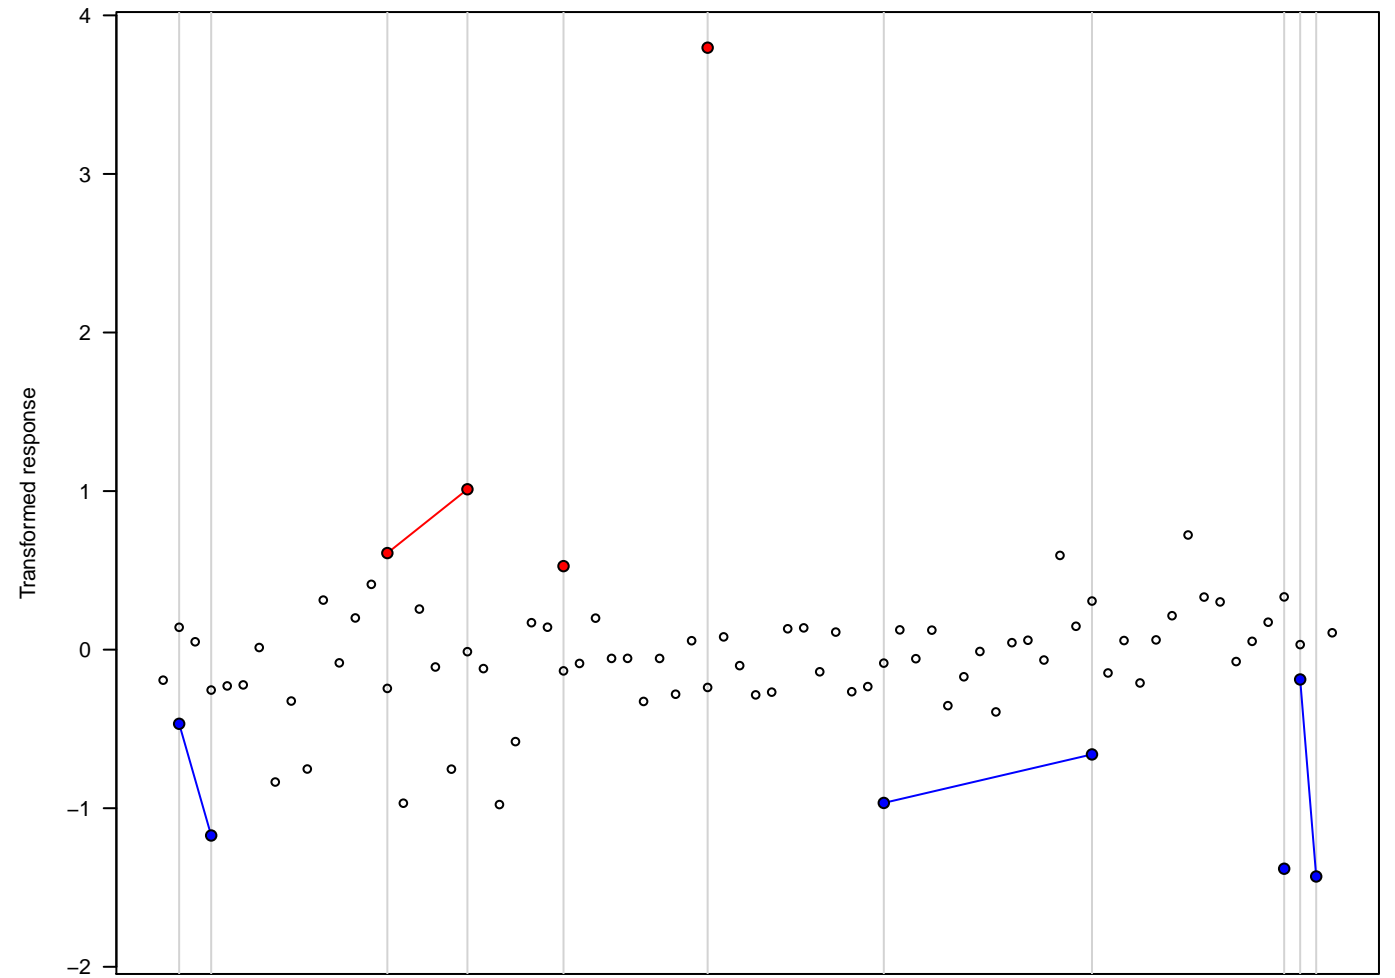

Alpha-amylase  
(Clinical Chemistry)

HMGU

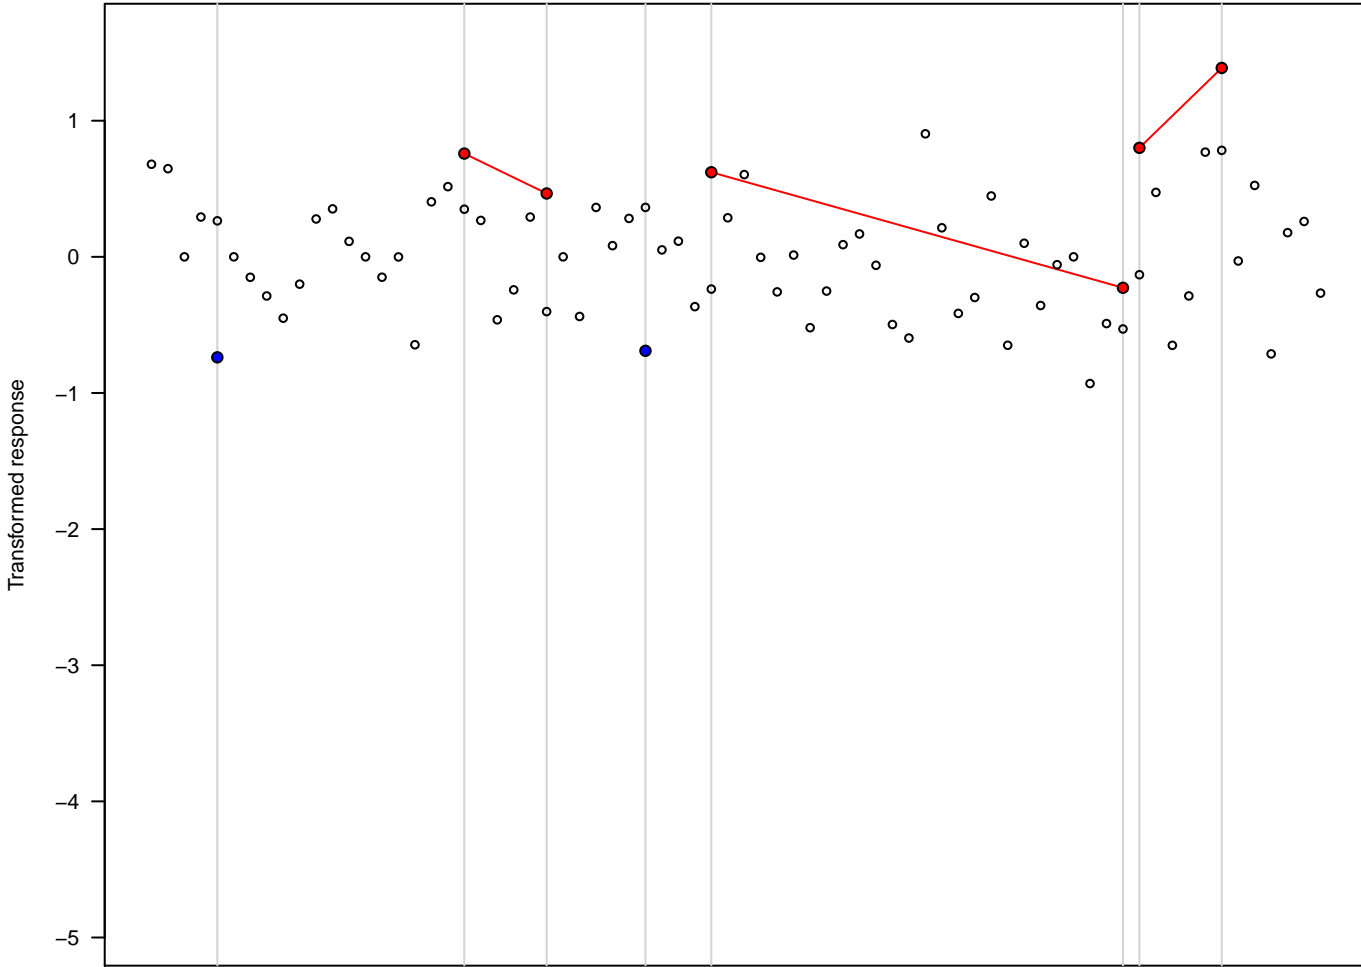

MRC Harwell

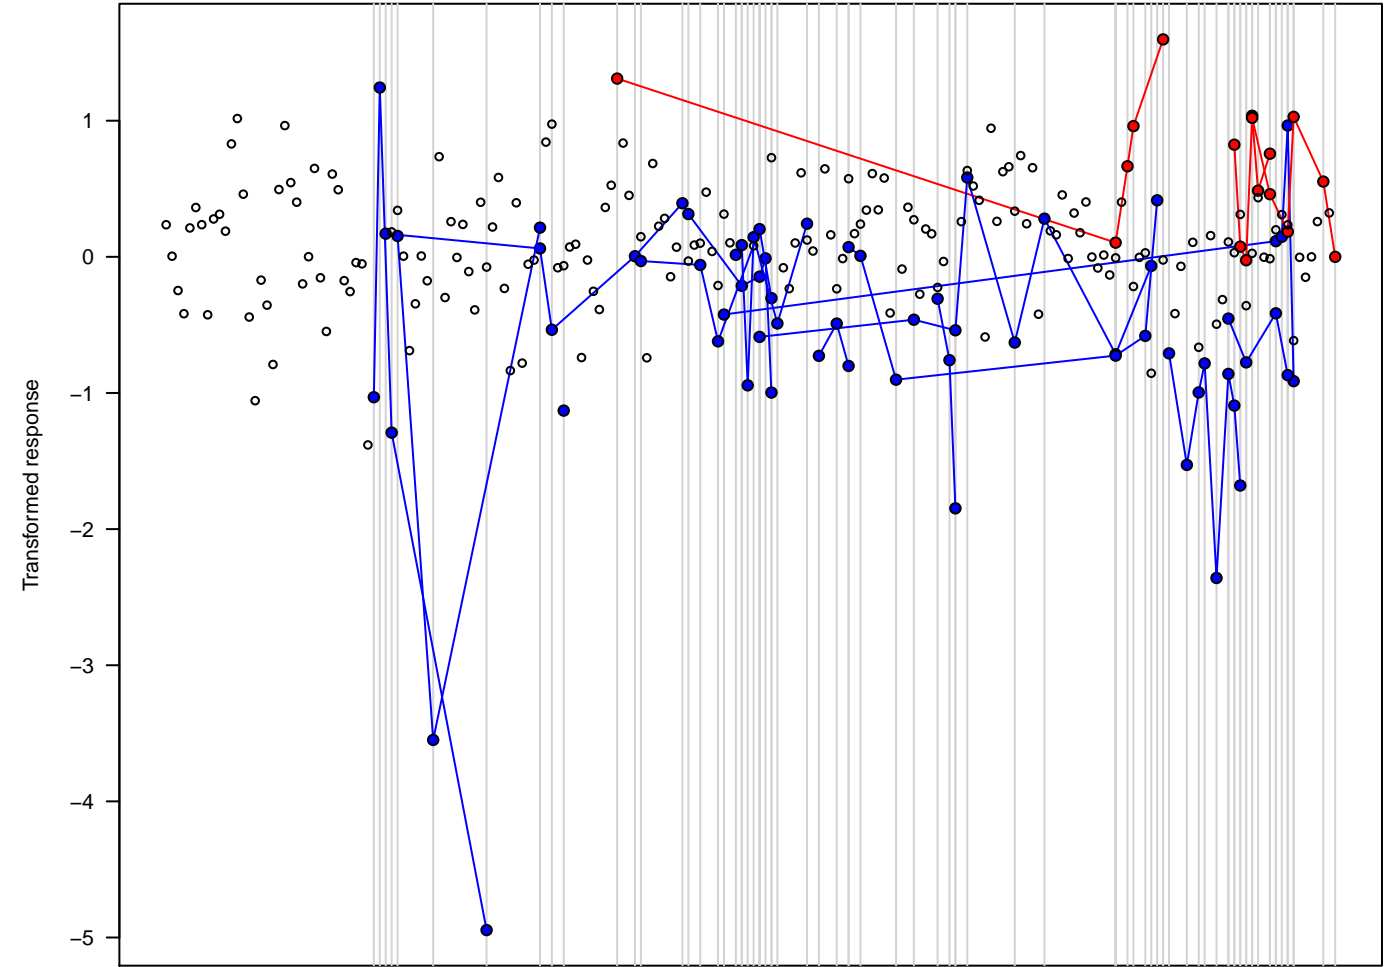

WTSI

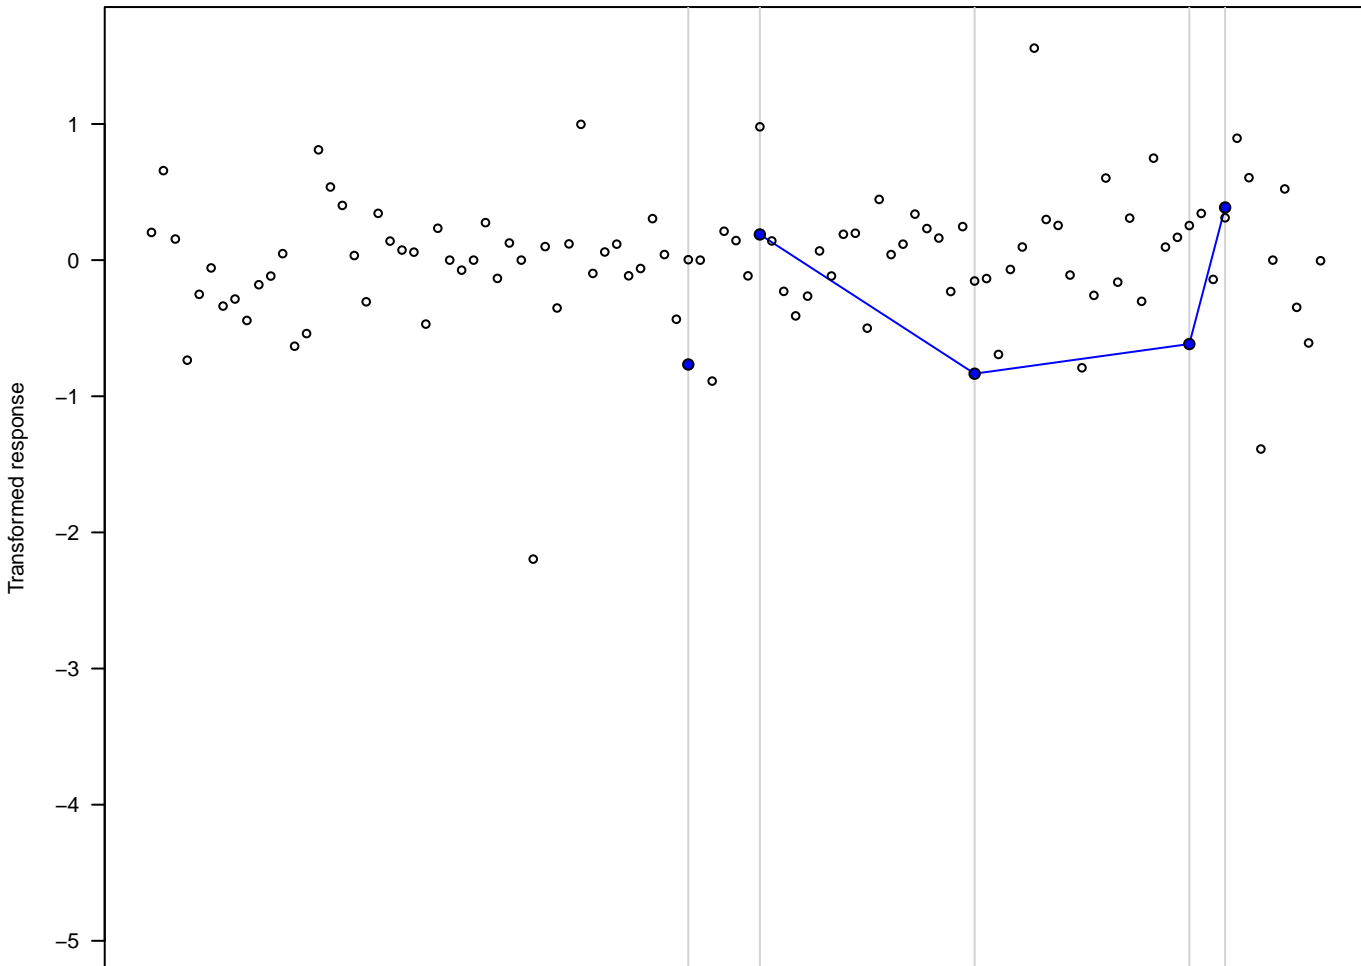

ICS

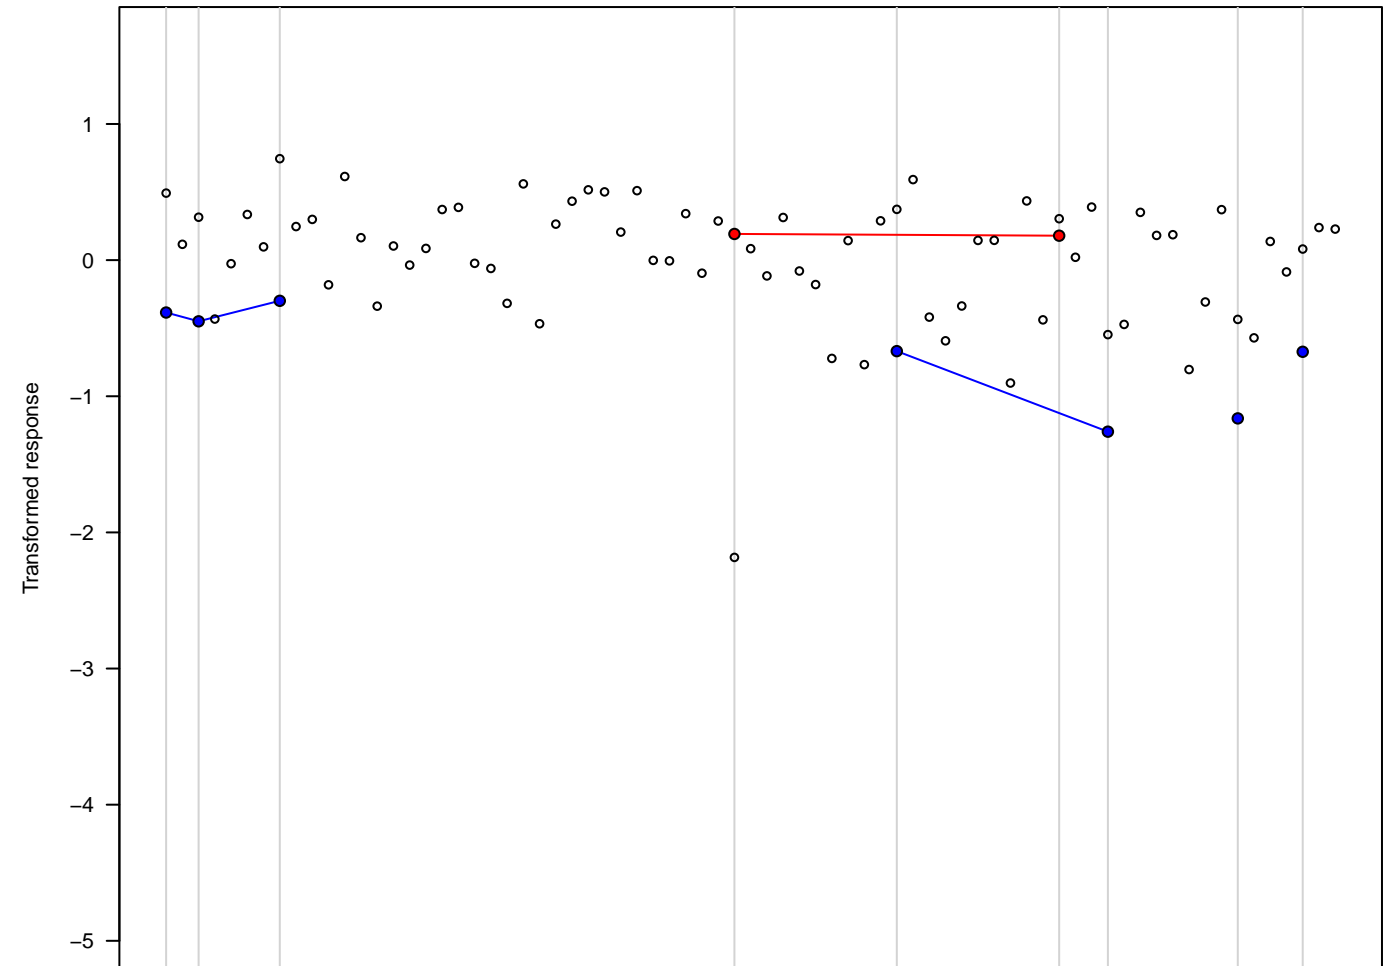

Total cholesterol  
(Clinical Chemistry)

HMGU

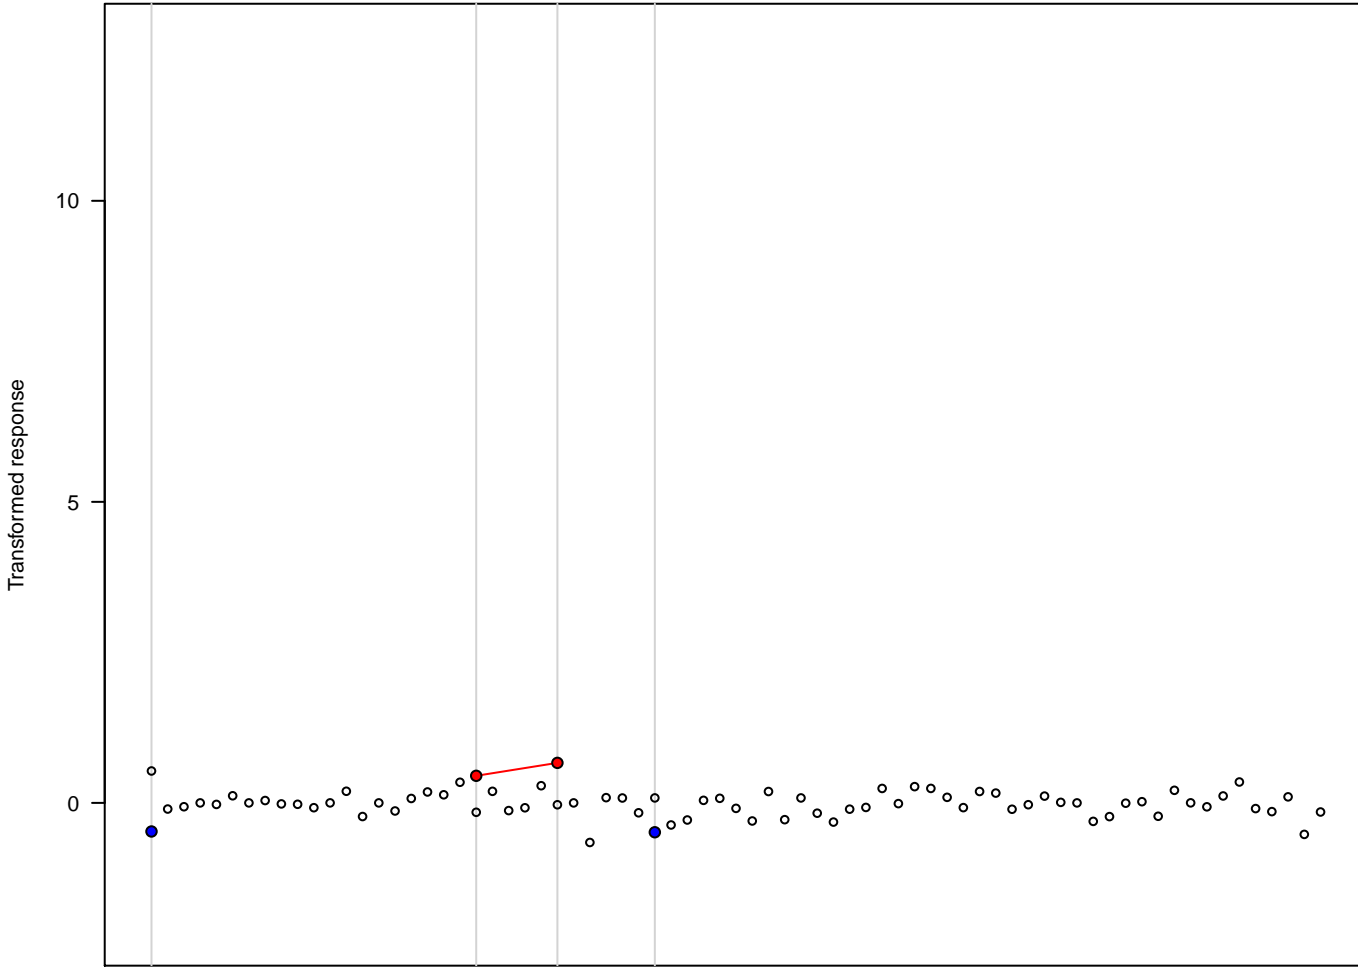

MRC Harwell

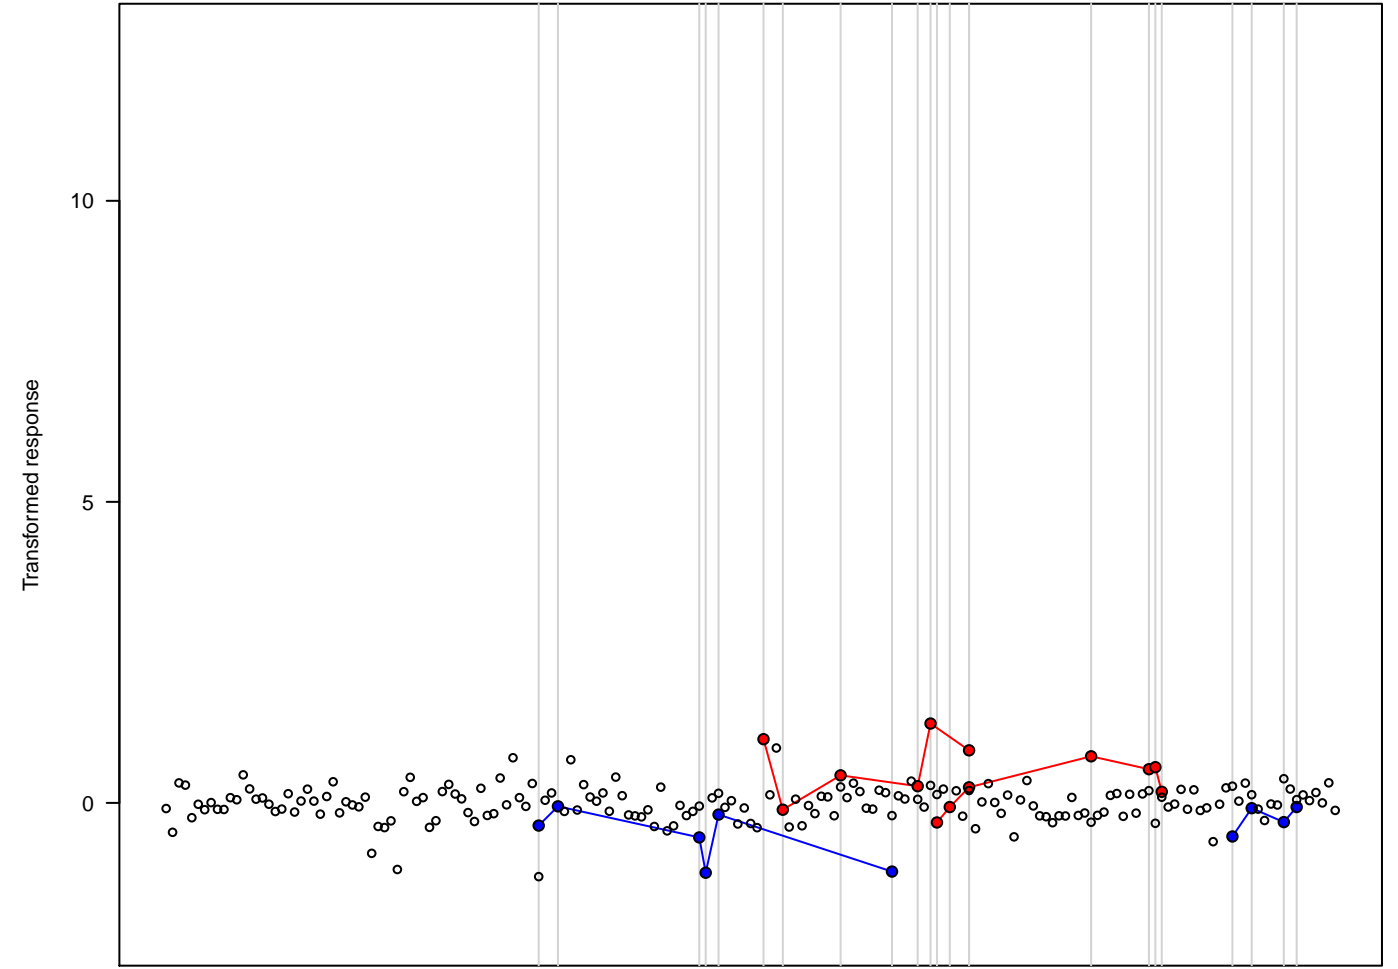

WTSI

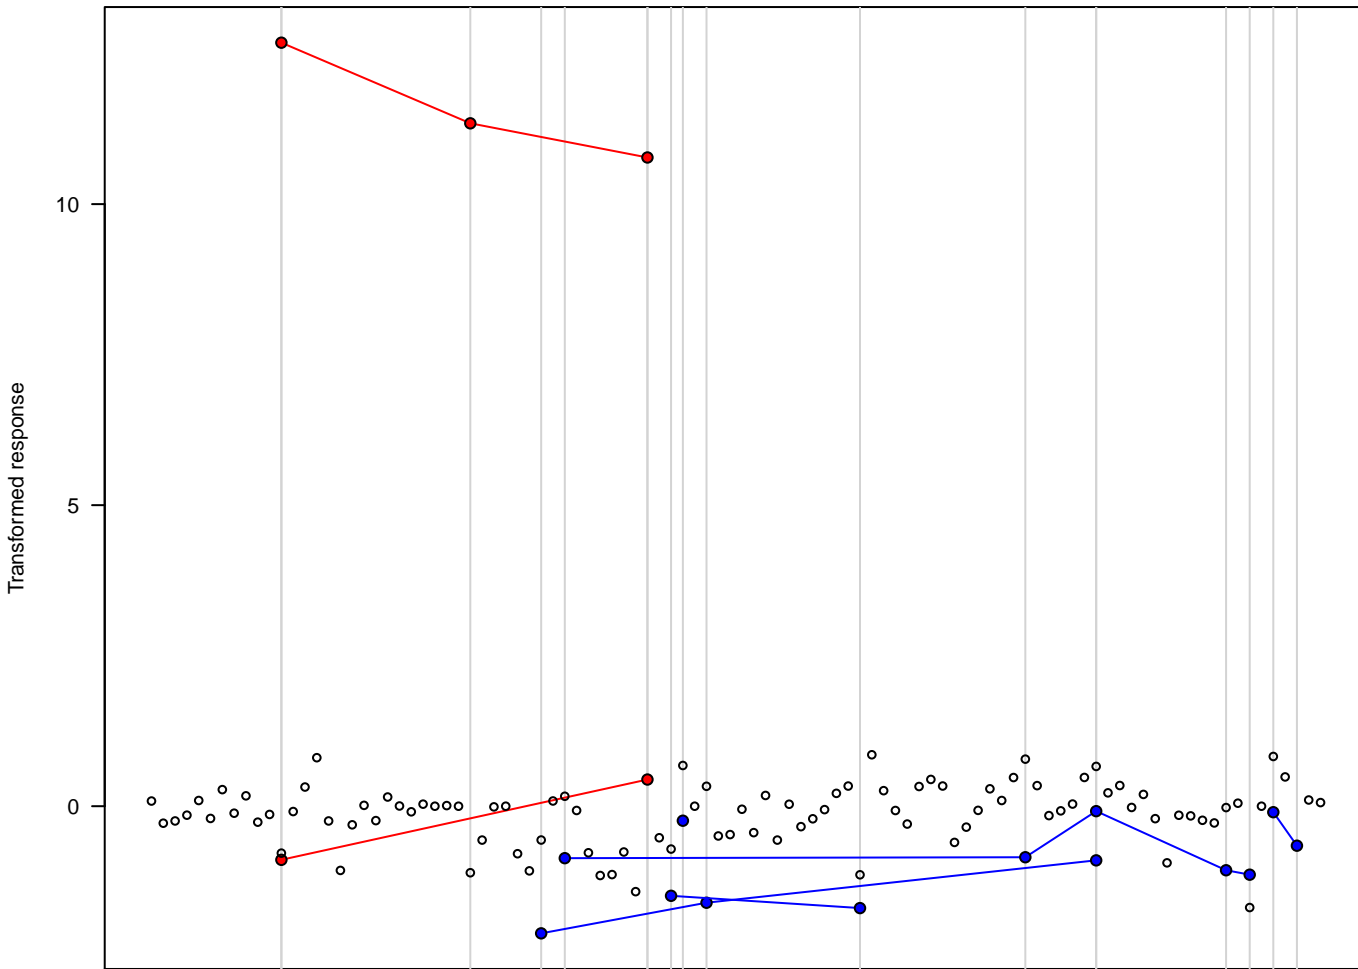

ICS

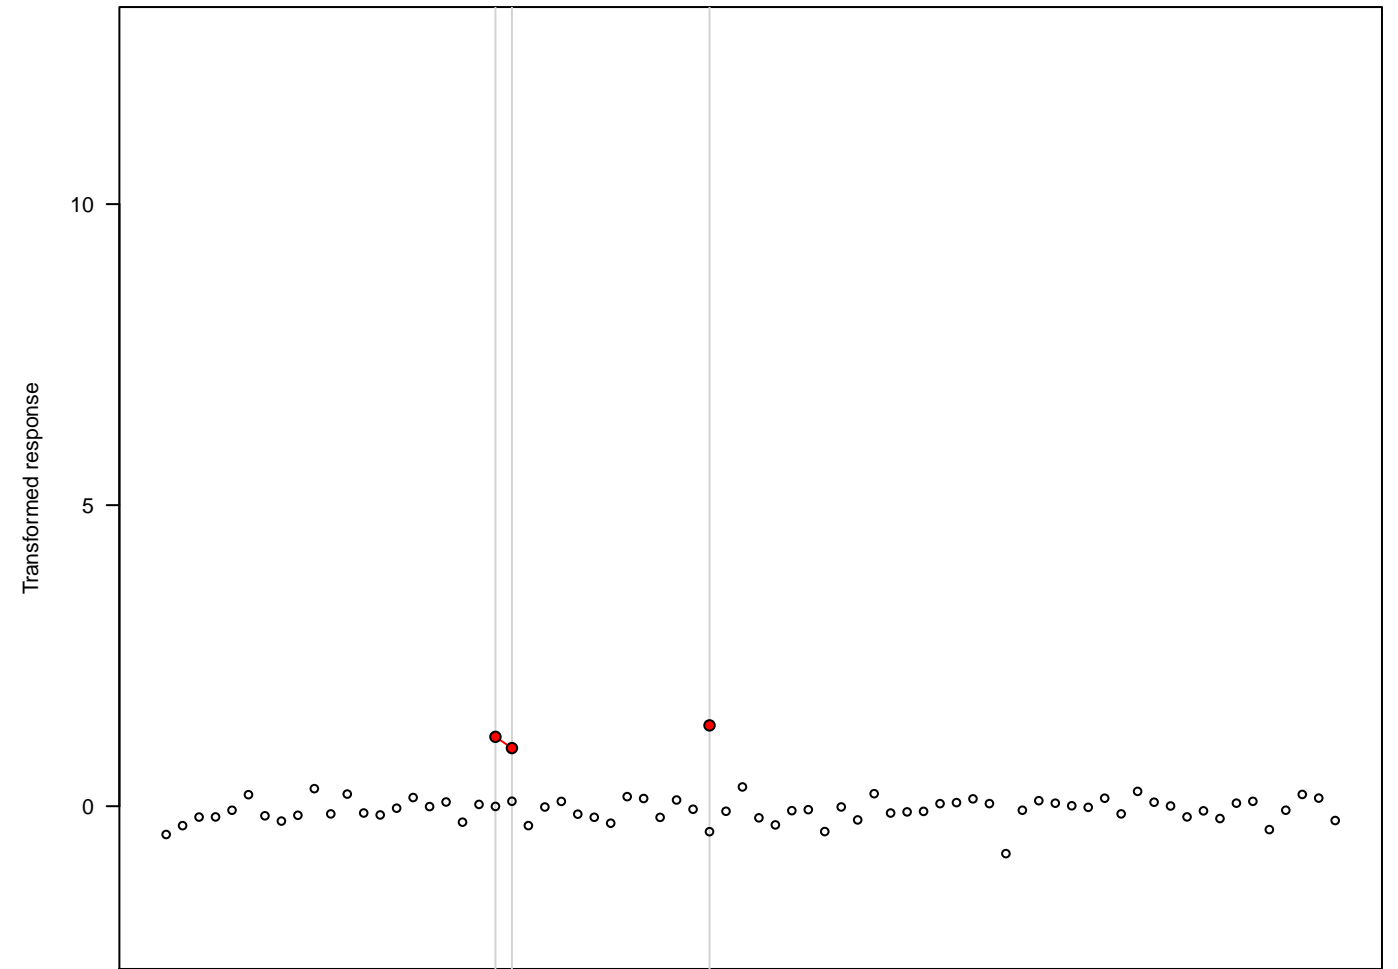

Triglyceride  
(Clinical Chemistry)

HMGU

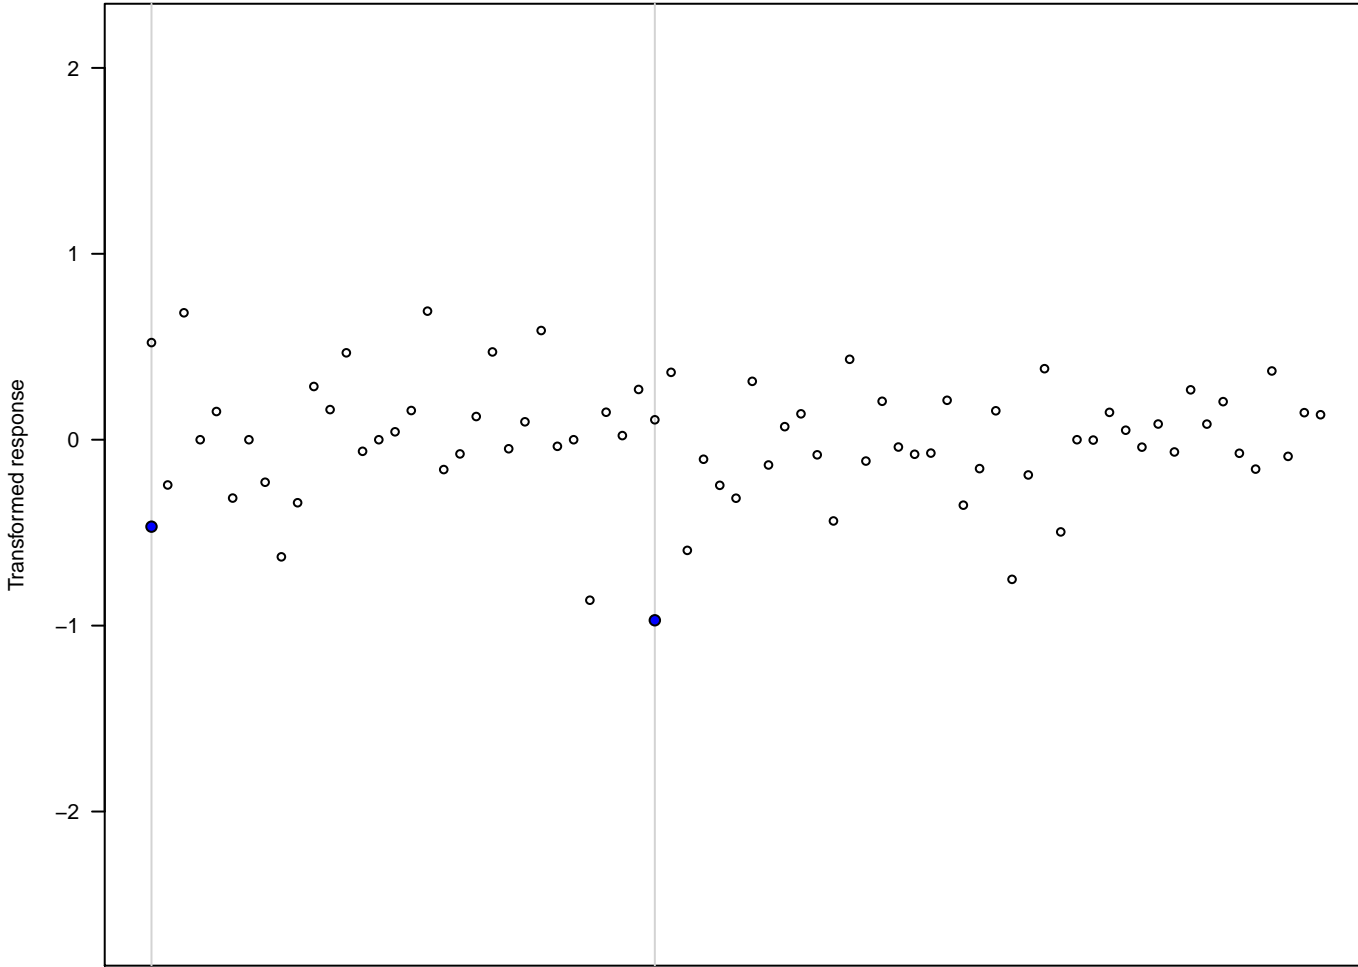

MRC Harwell

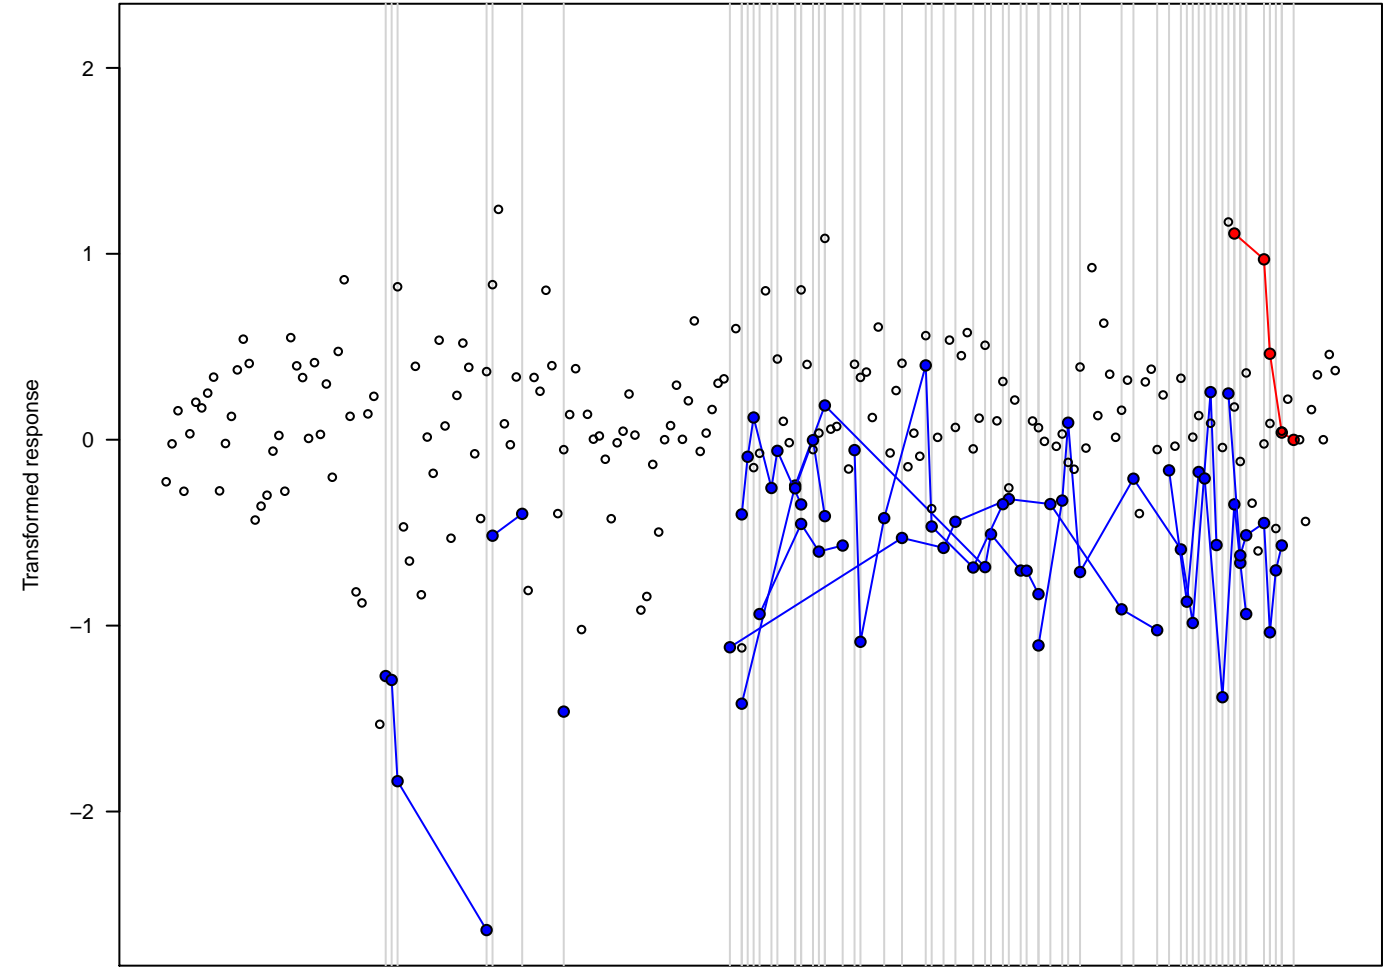

WTSI

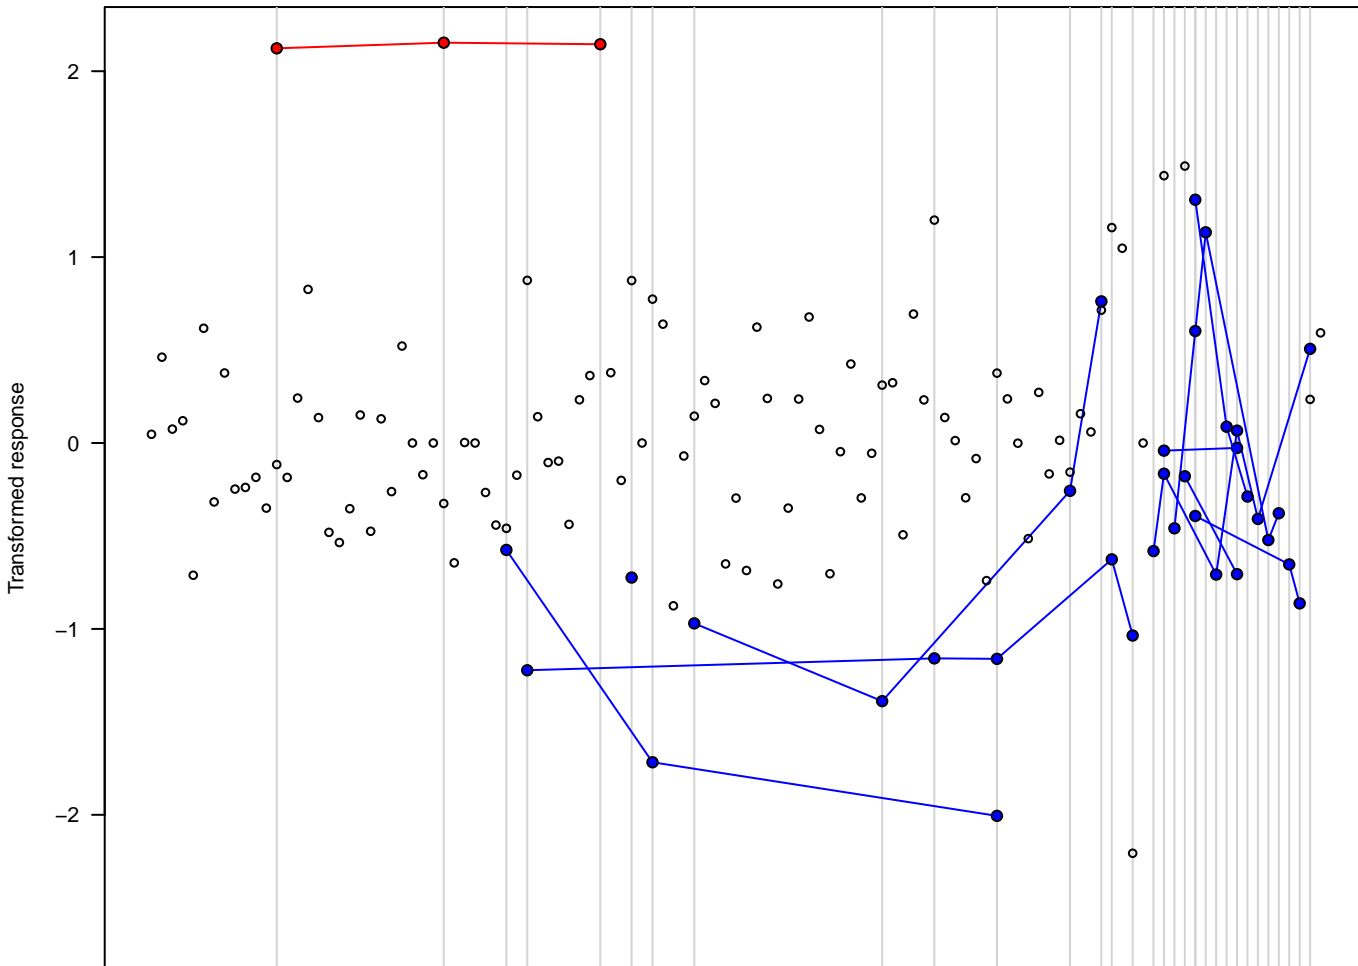

ICS

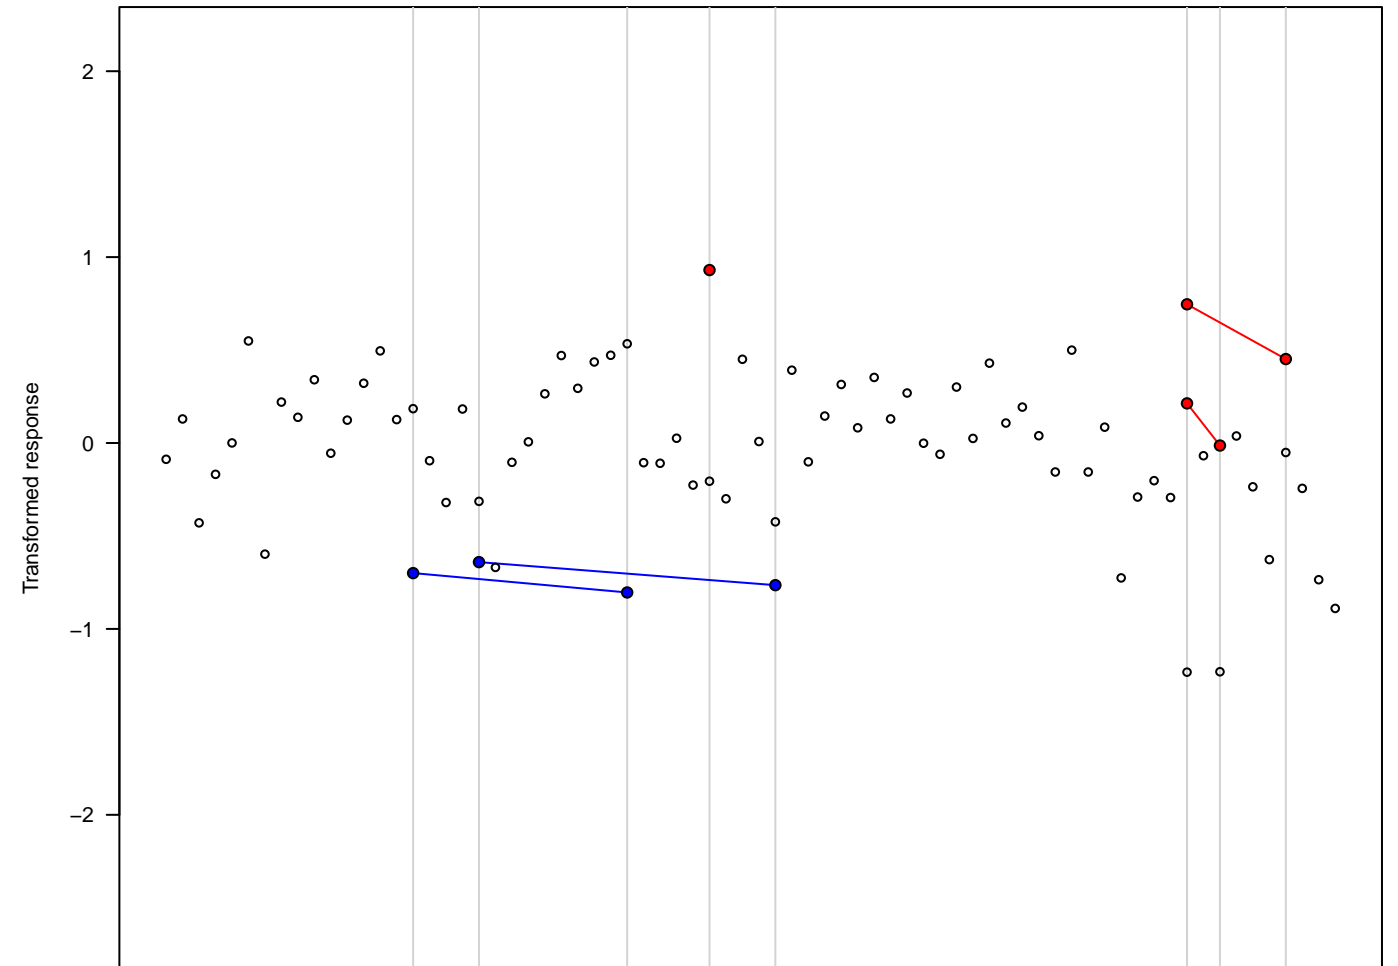

Free fatty acid  
(Clinical Chemistry)

HMGU

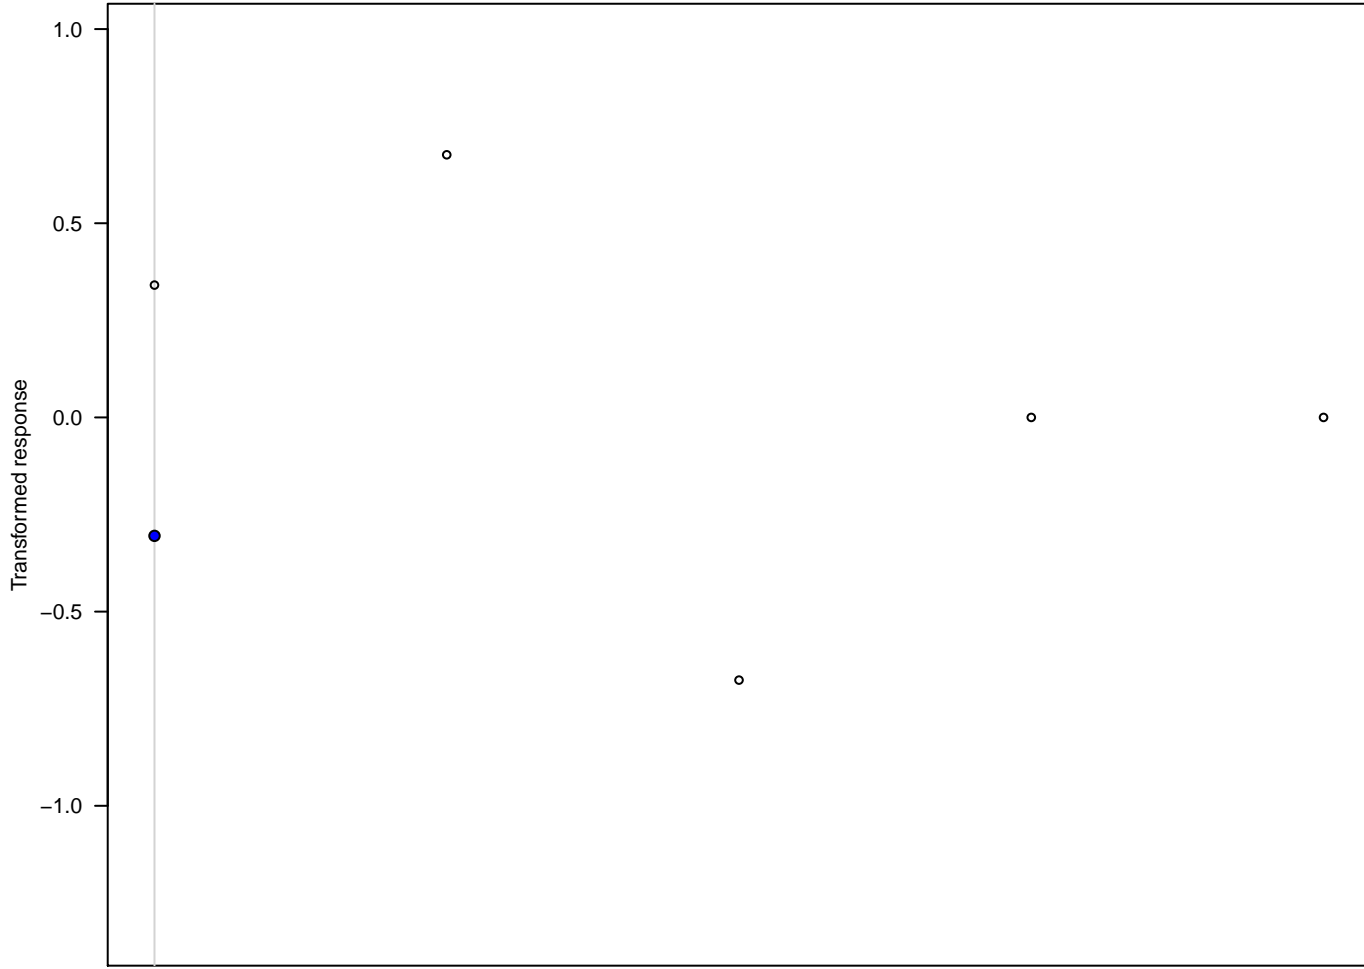

MRC Harwell

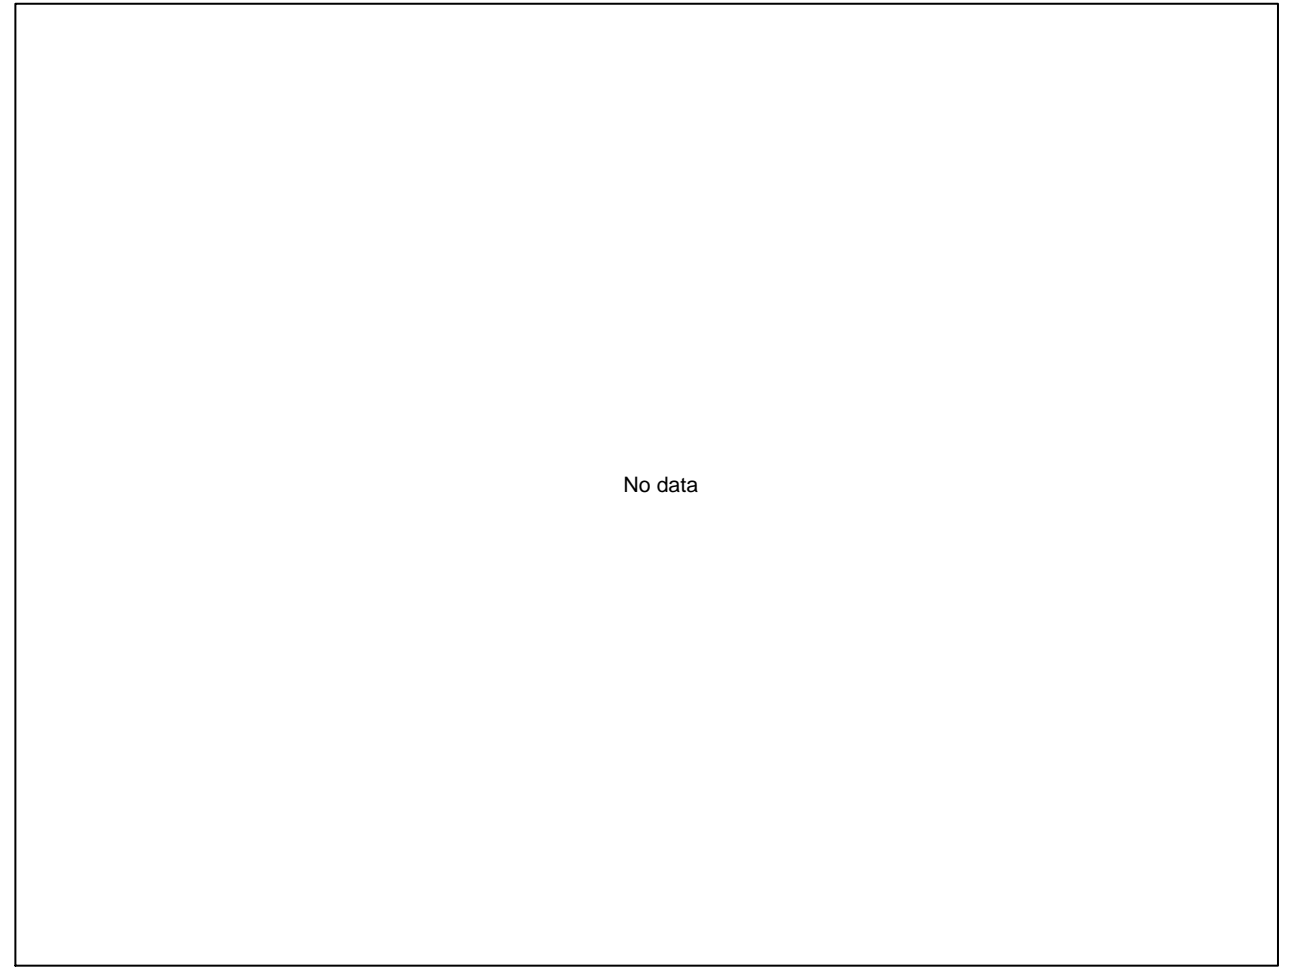

WTSI

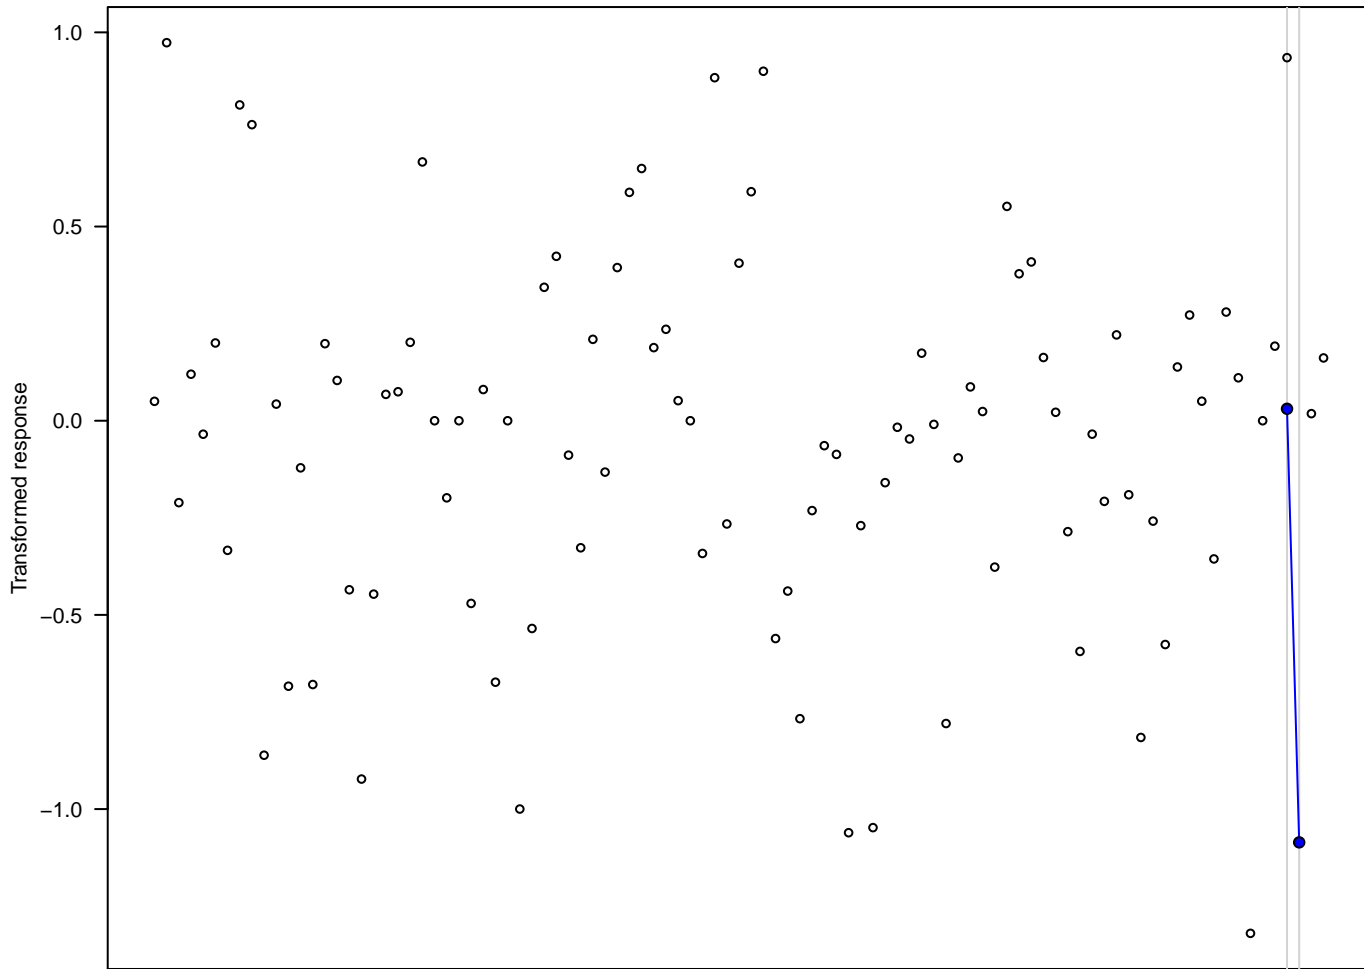

ICS

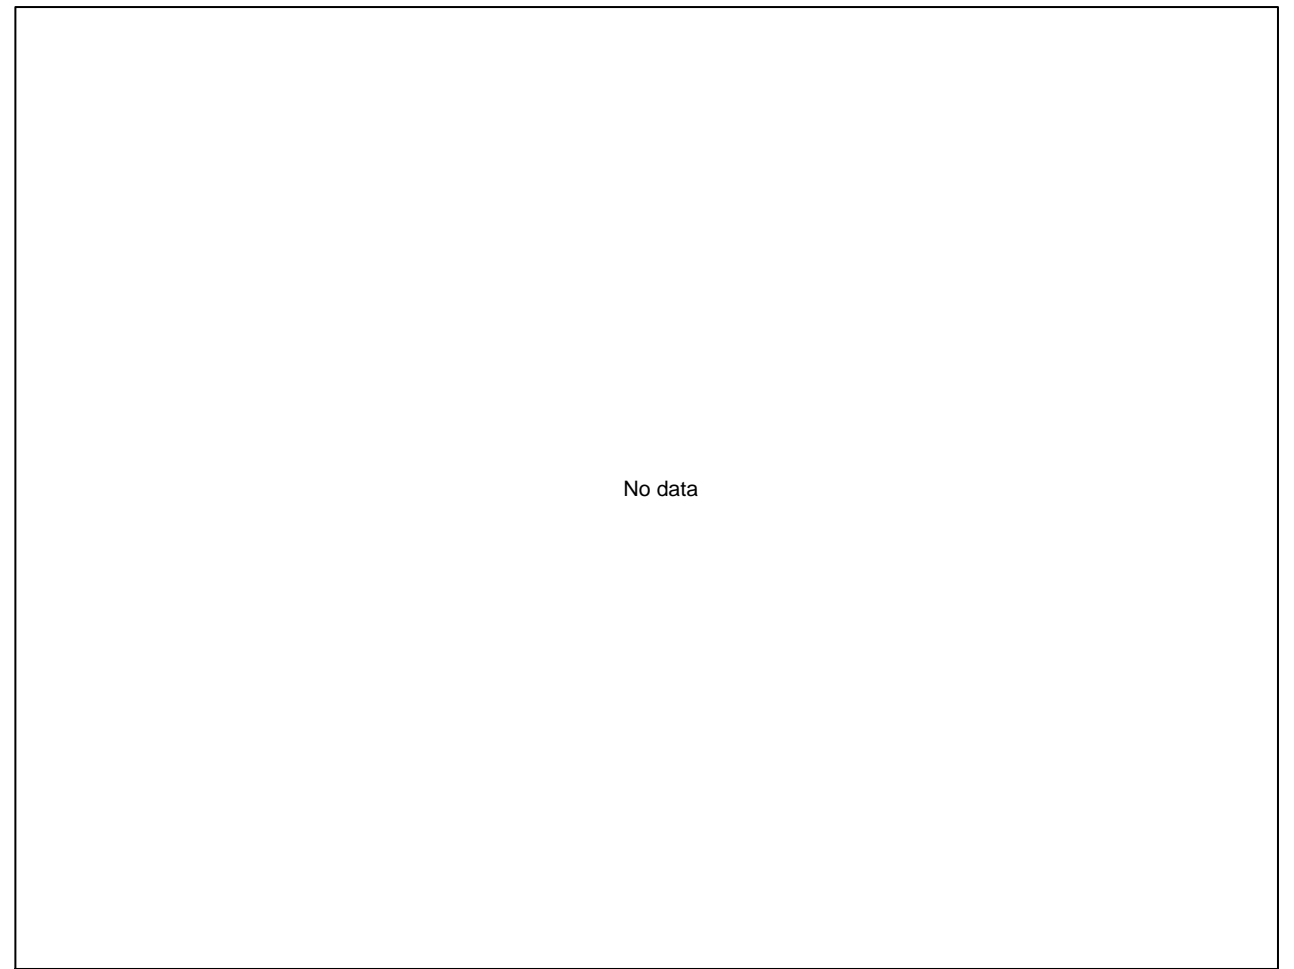



Creatine kinase  
(Clinical Chemistry)

HMGU

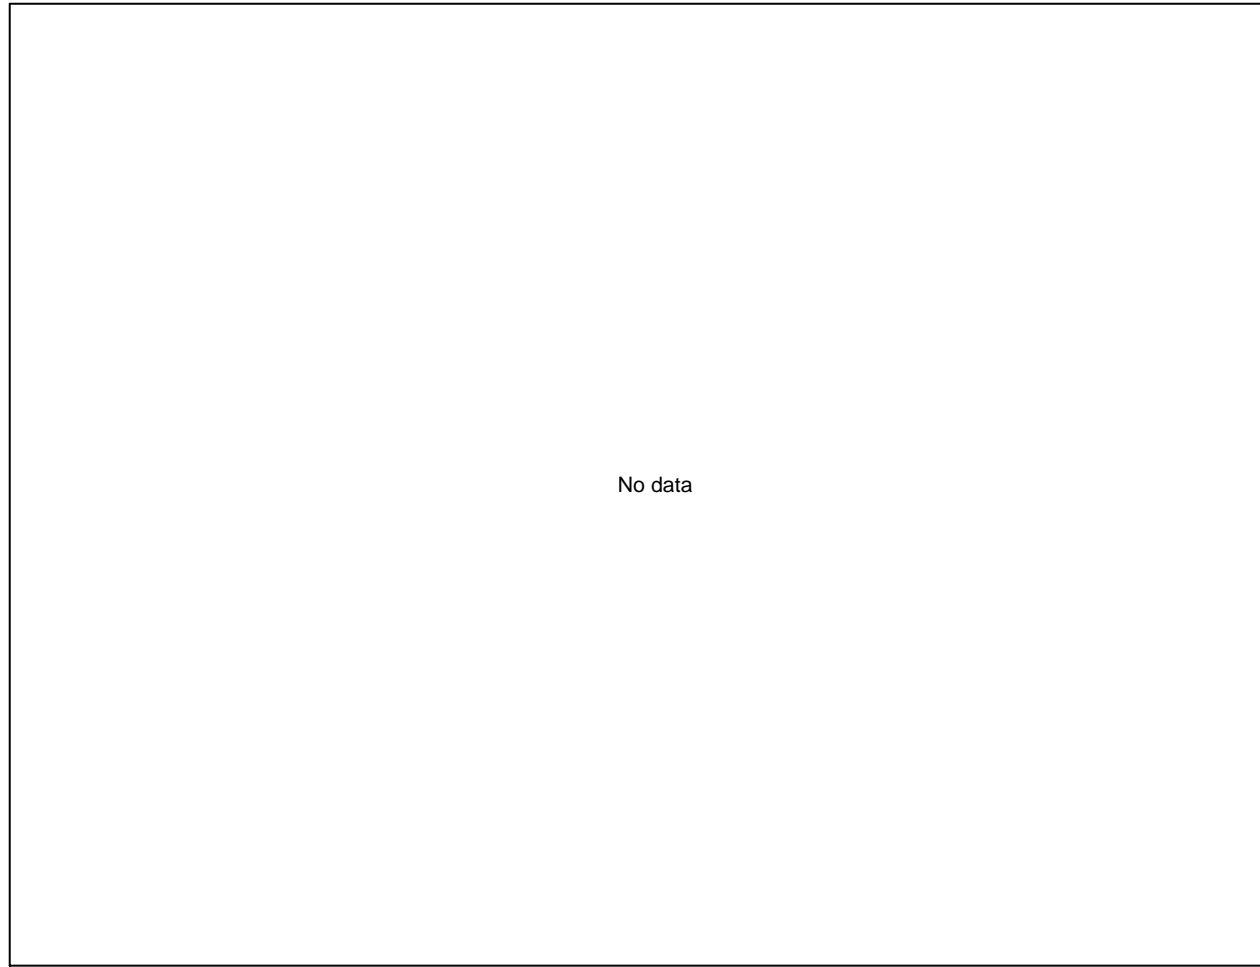

MRC Harwell



WTSI

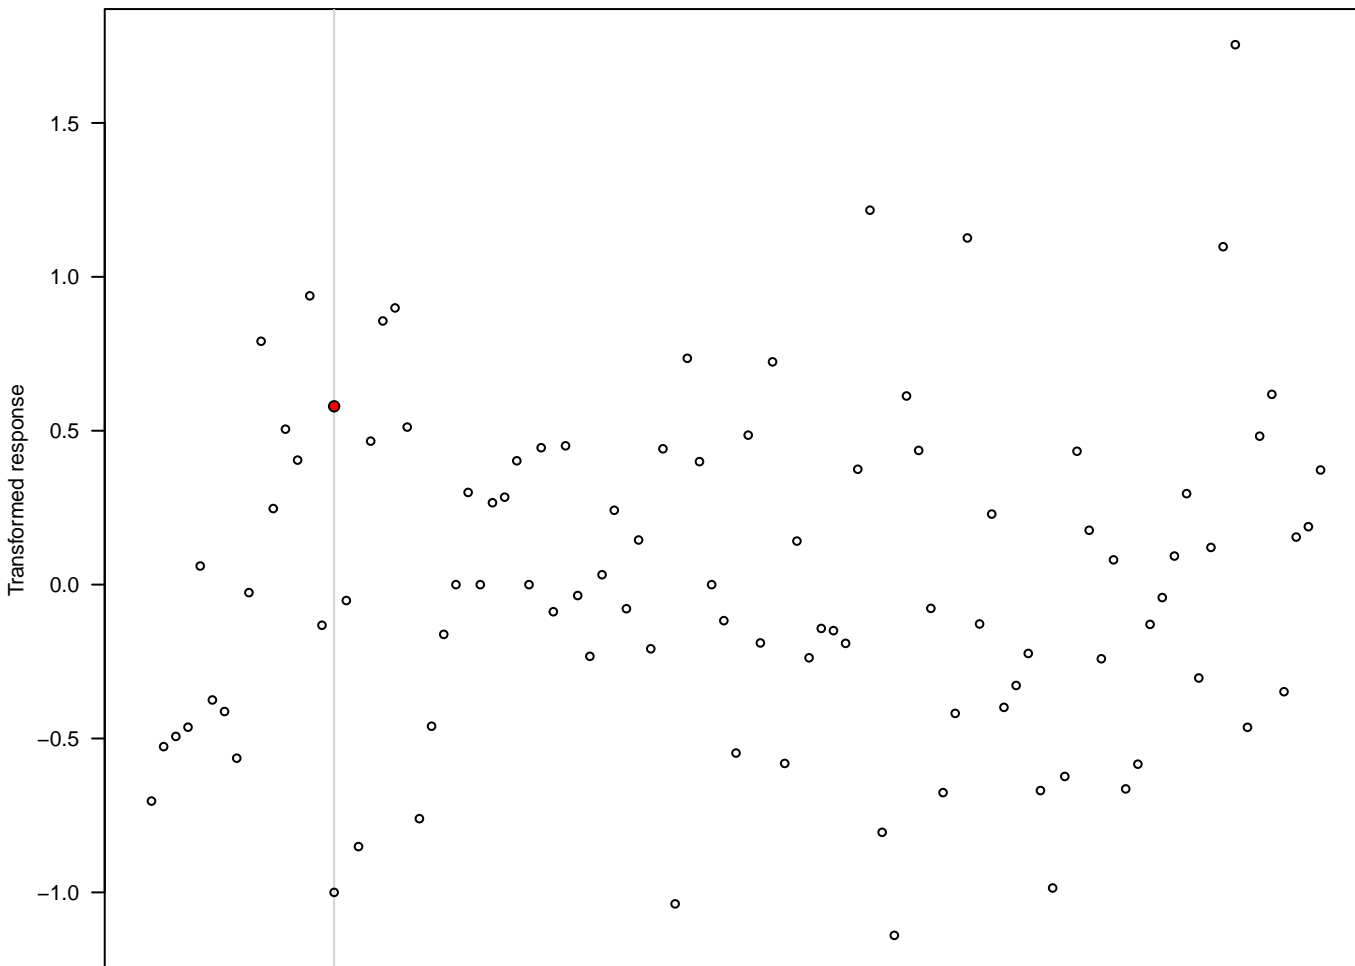

ICS

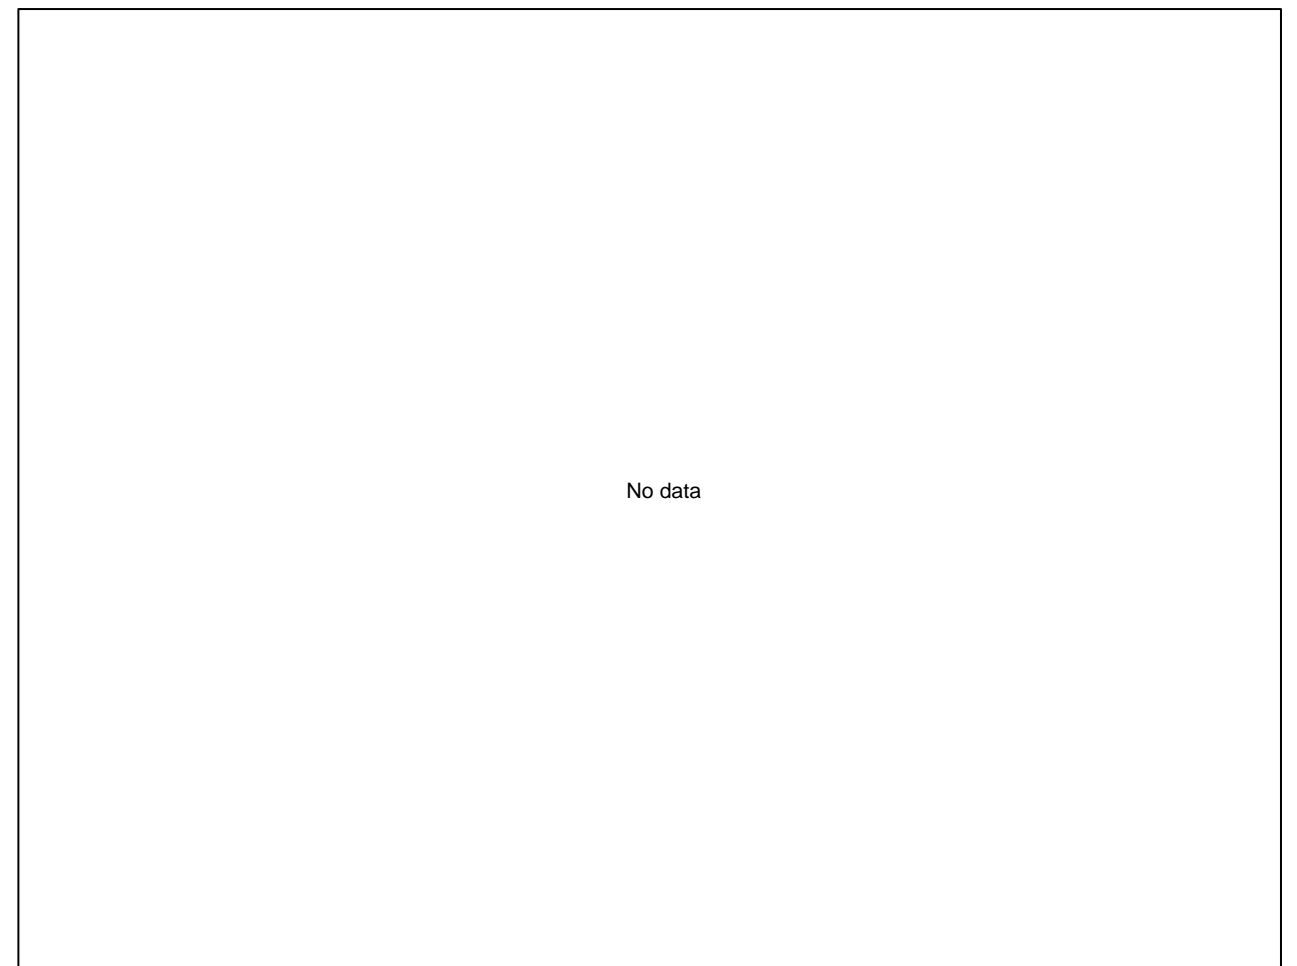

Uric acid  
(Clinical Chemistry)

HMGU



MRC Harwell



WTSI

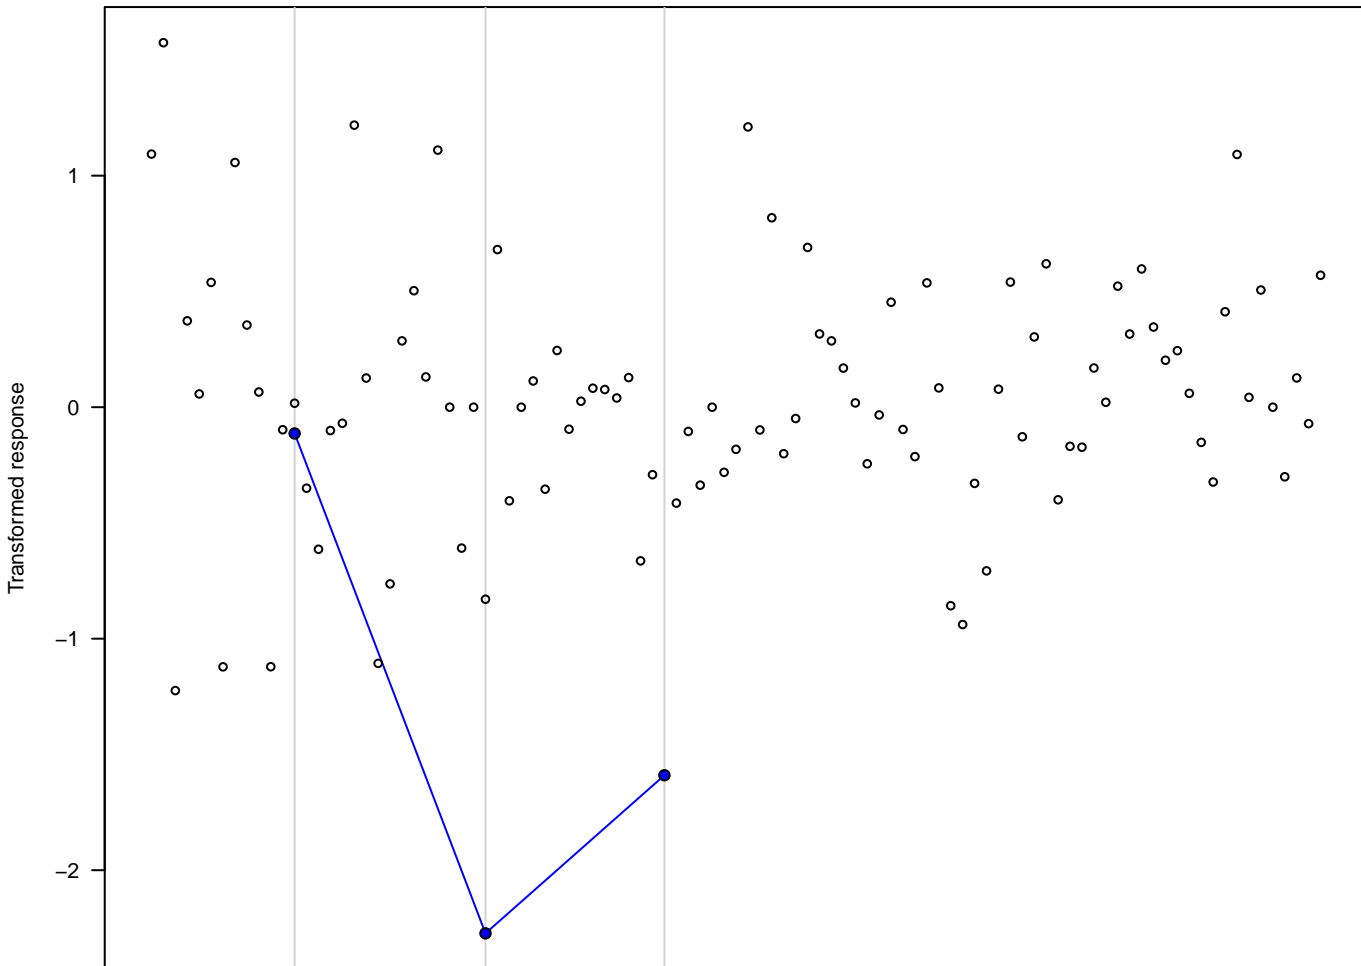

ICS



Total bilirubin  
(Clinical Chemistry)

HMGU



MRC Harwell

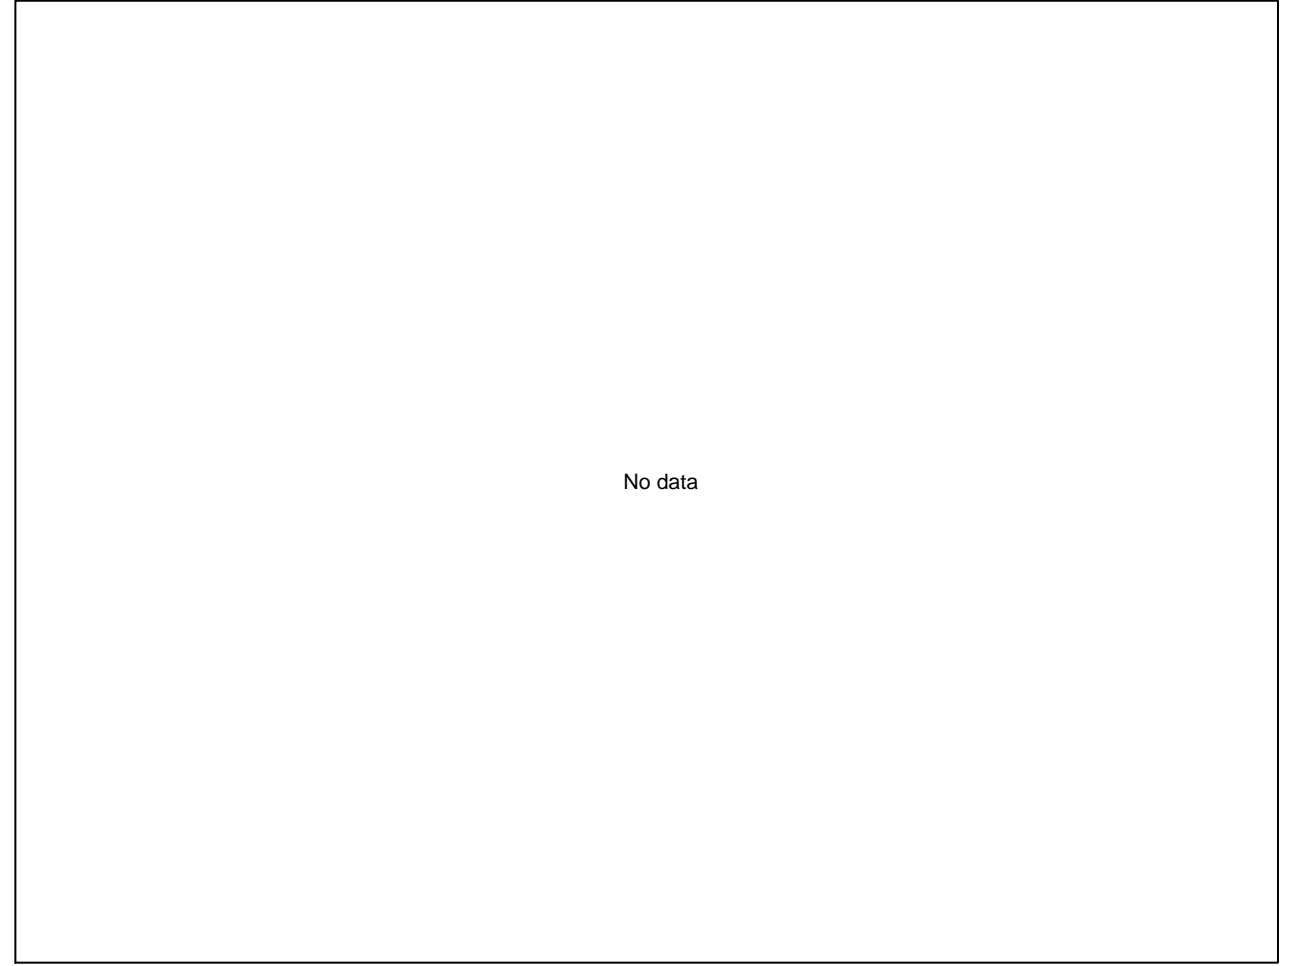

WTSI

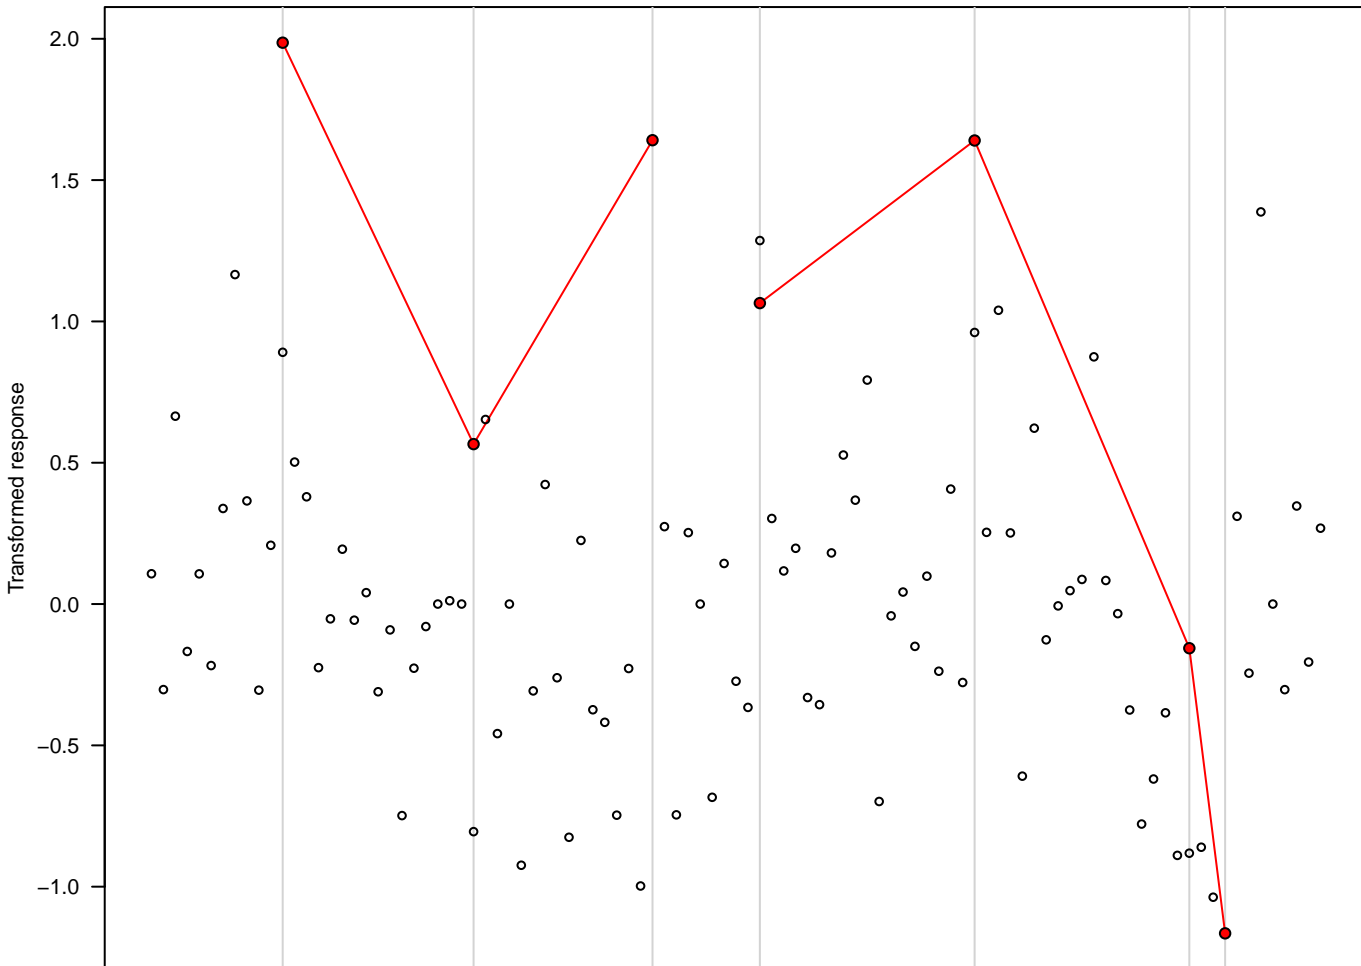

ICS

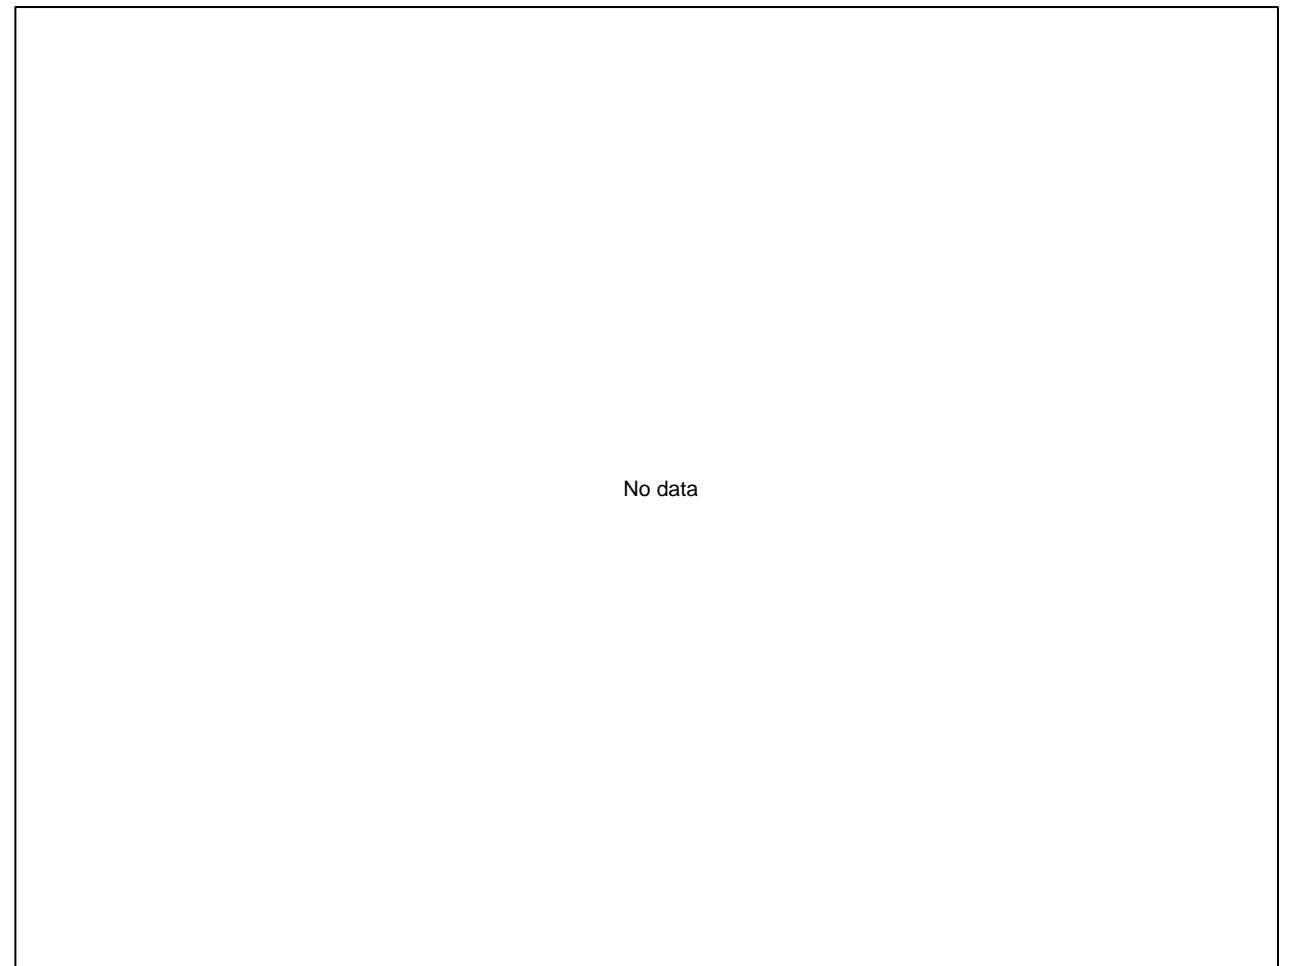

HDL-cholesterol  
(Clinical Chemistry)

HMGU



MRC Harwell



WTSI

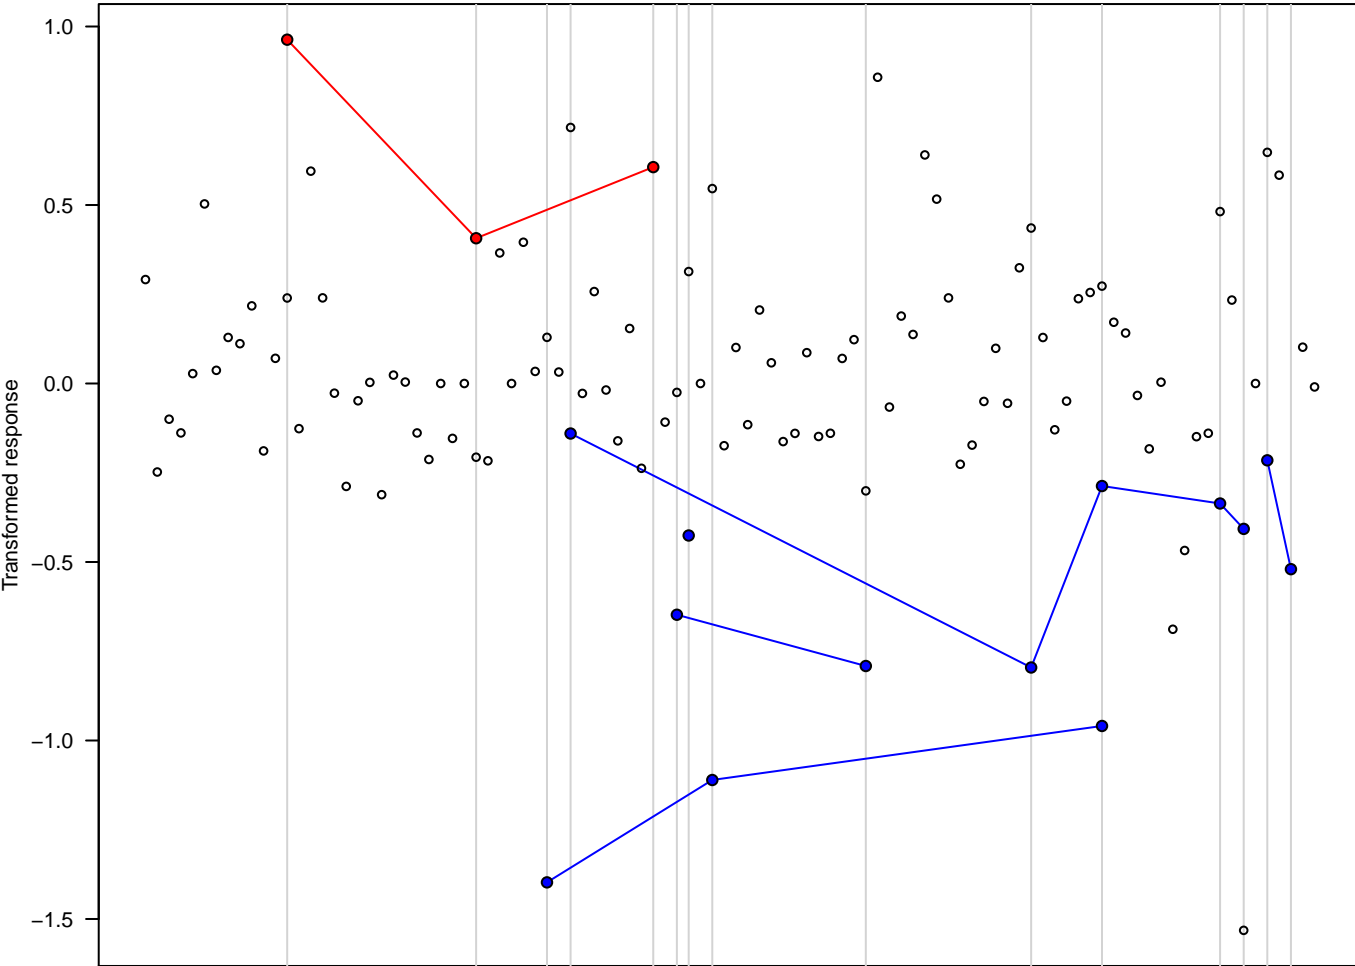

ICS

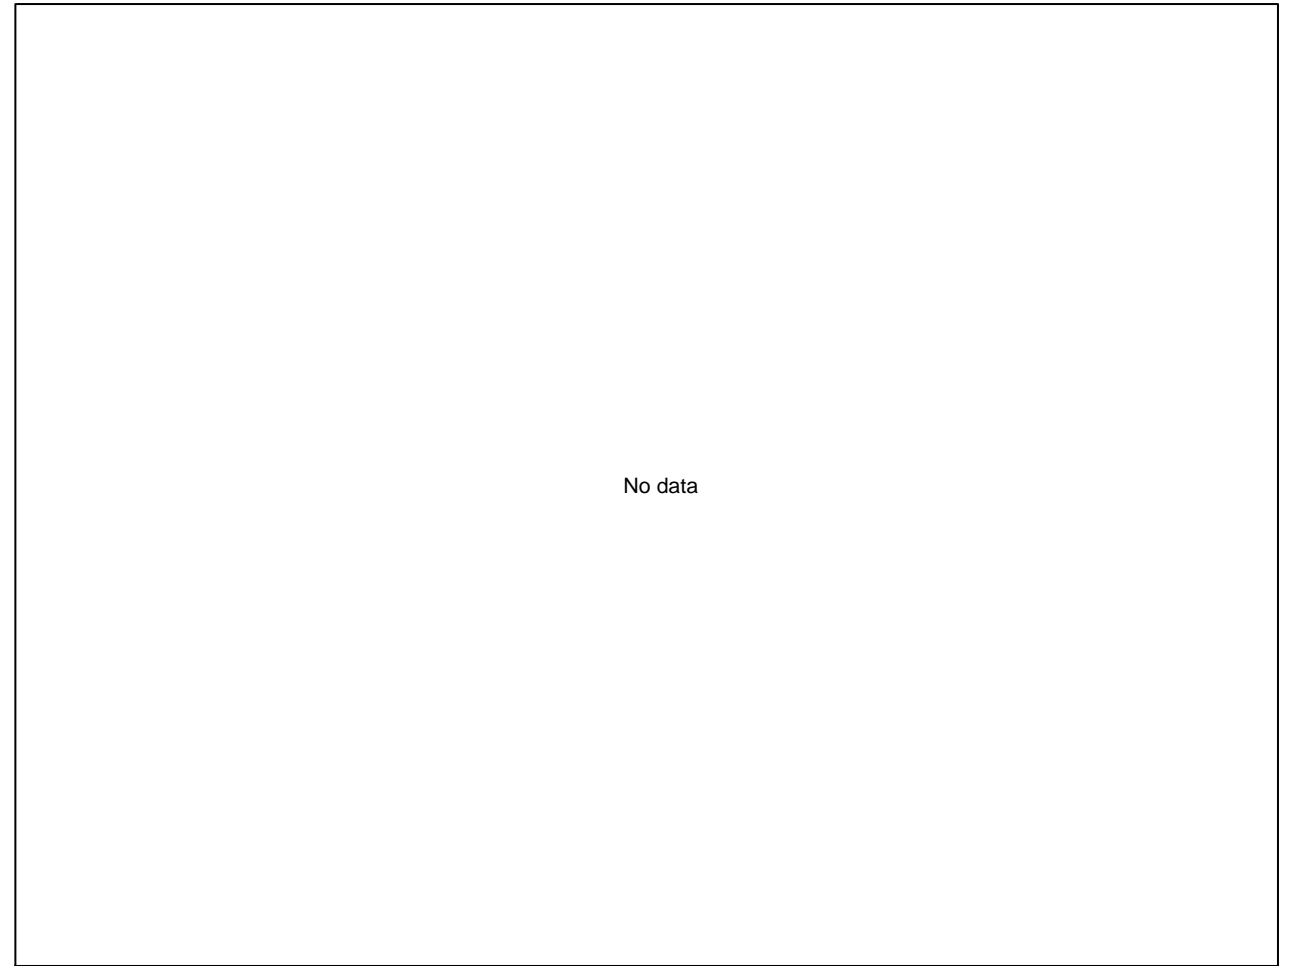

LDL-cholesterol  
(Clinical Chemistry)

HMGU

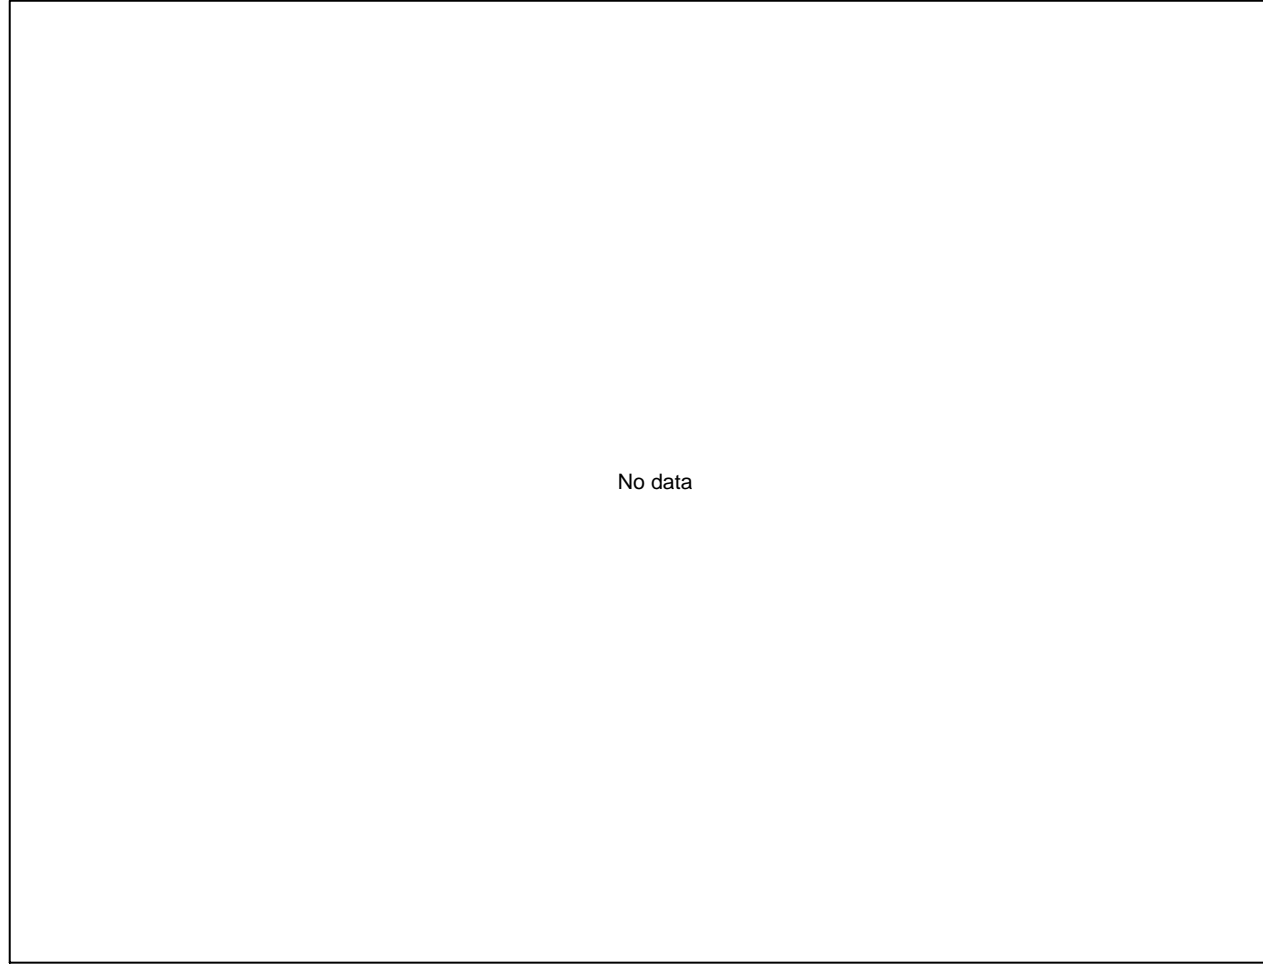

MRC Harwell

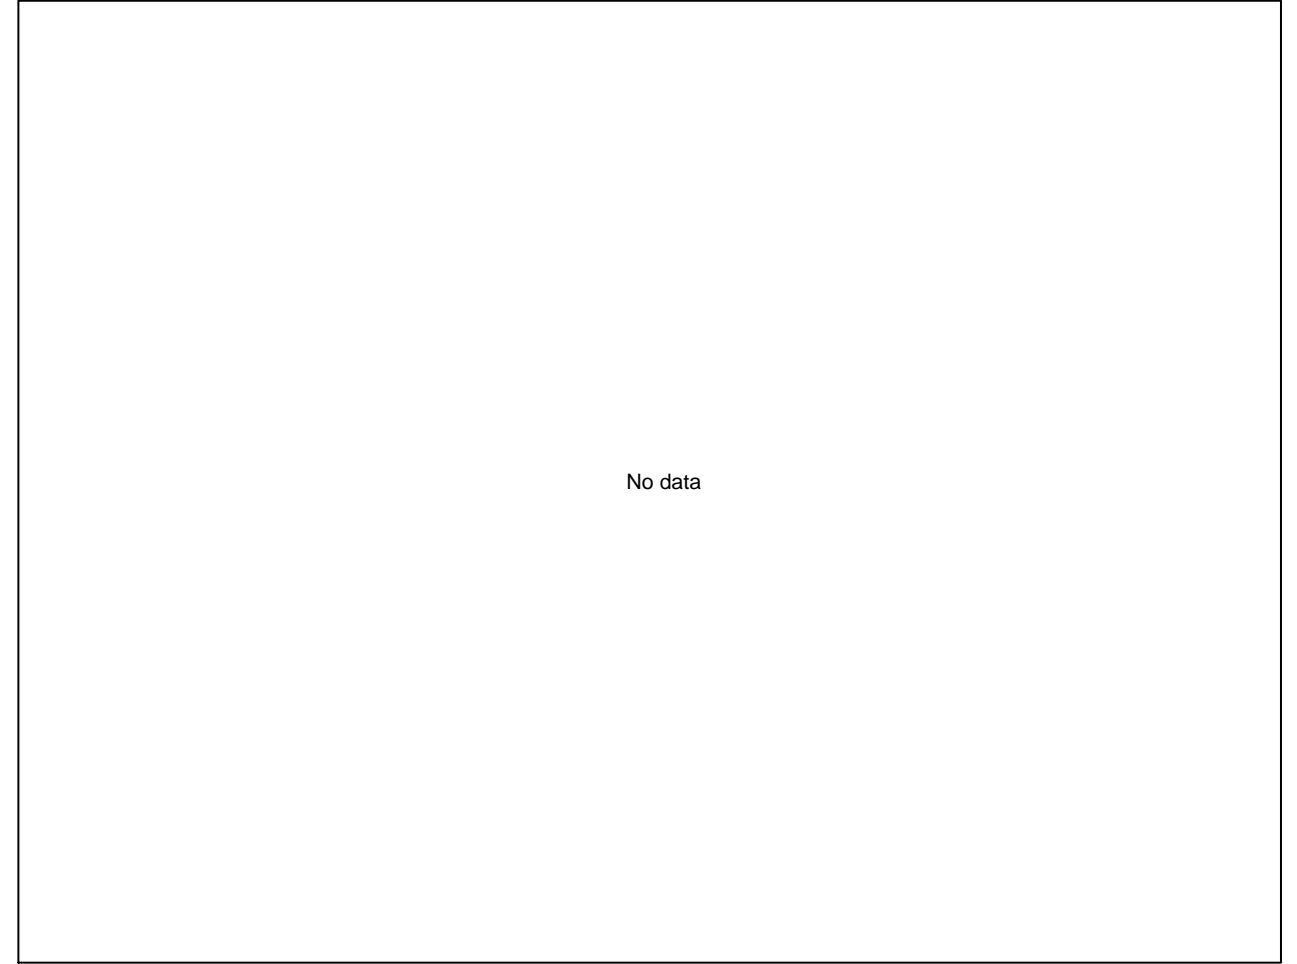

WTSI

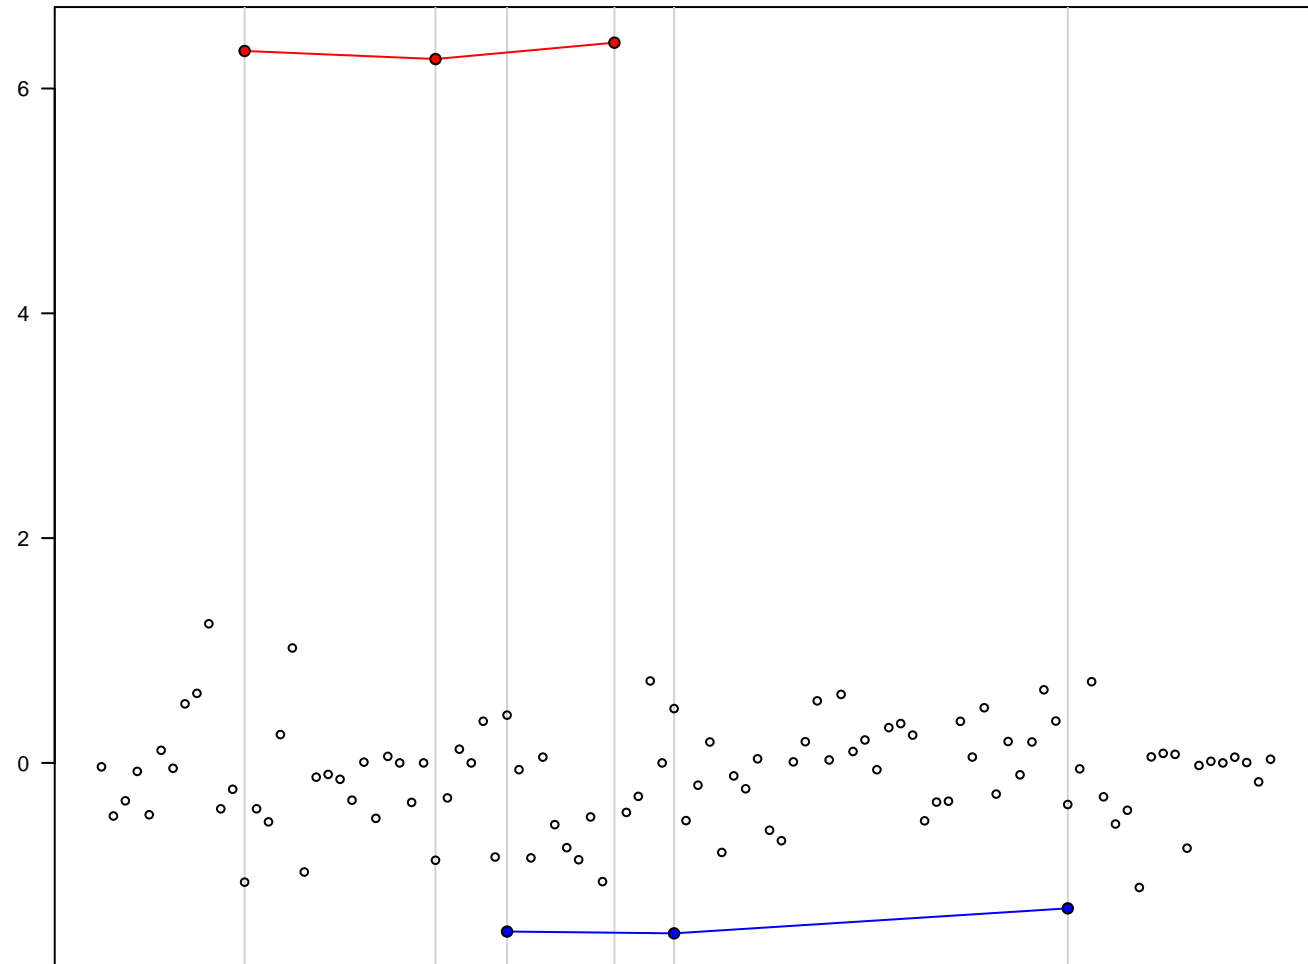

ICS

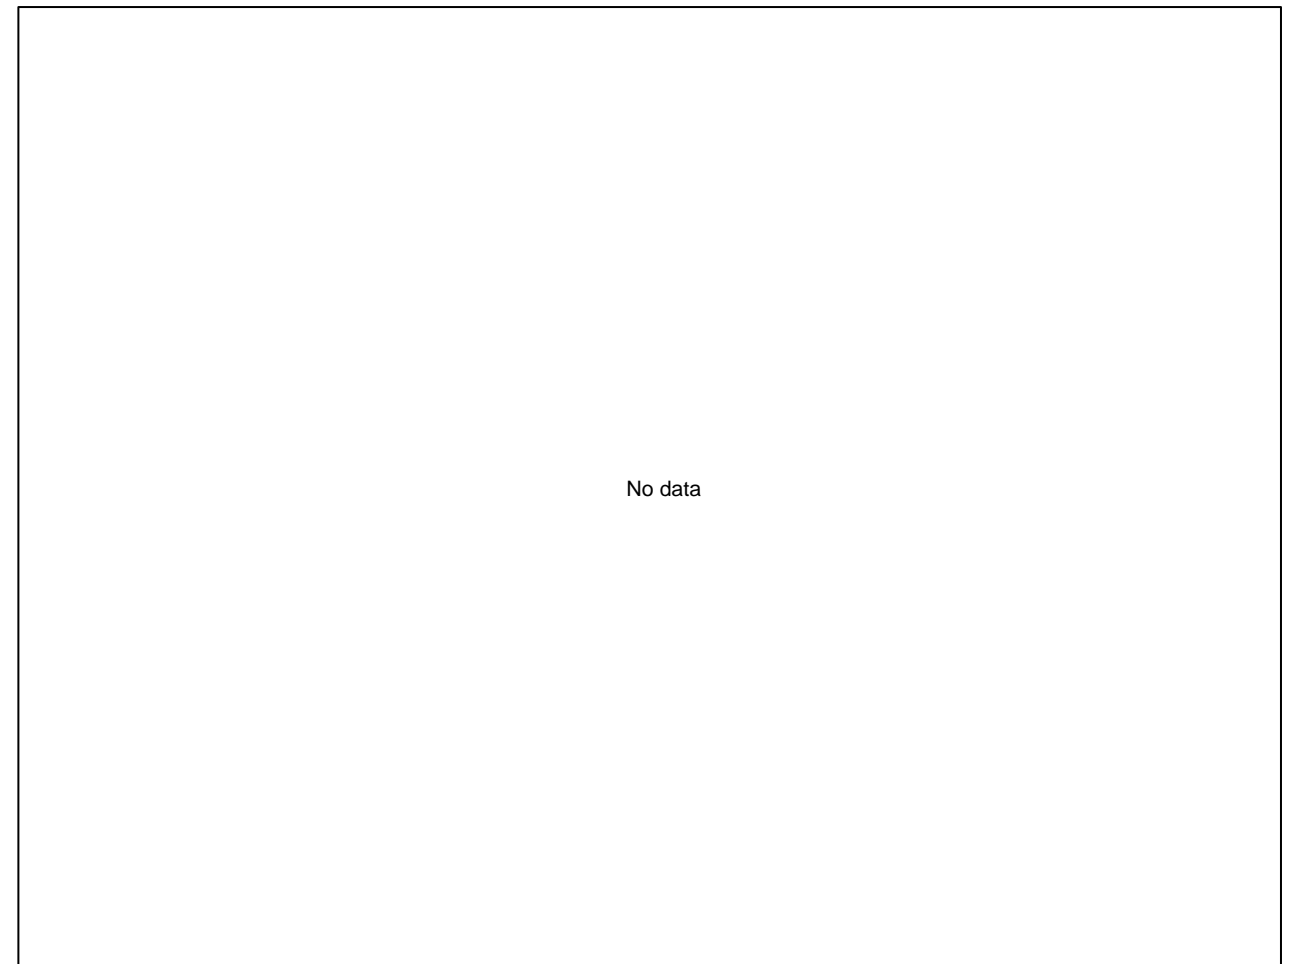

Ferretin  
(Clinical Chemistry)

HMGU

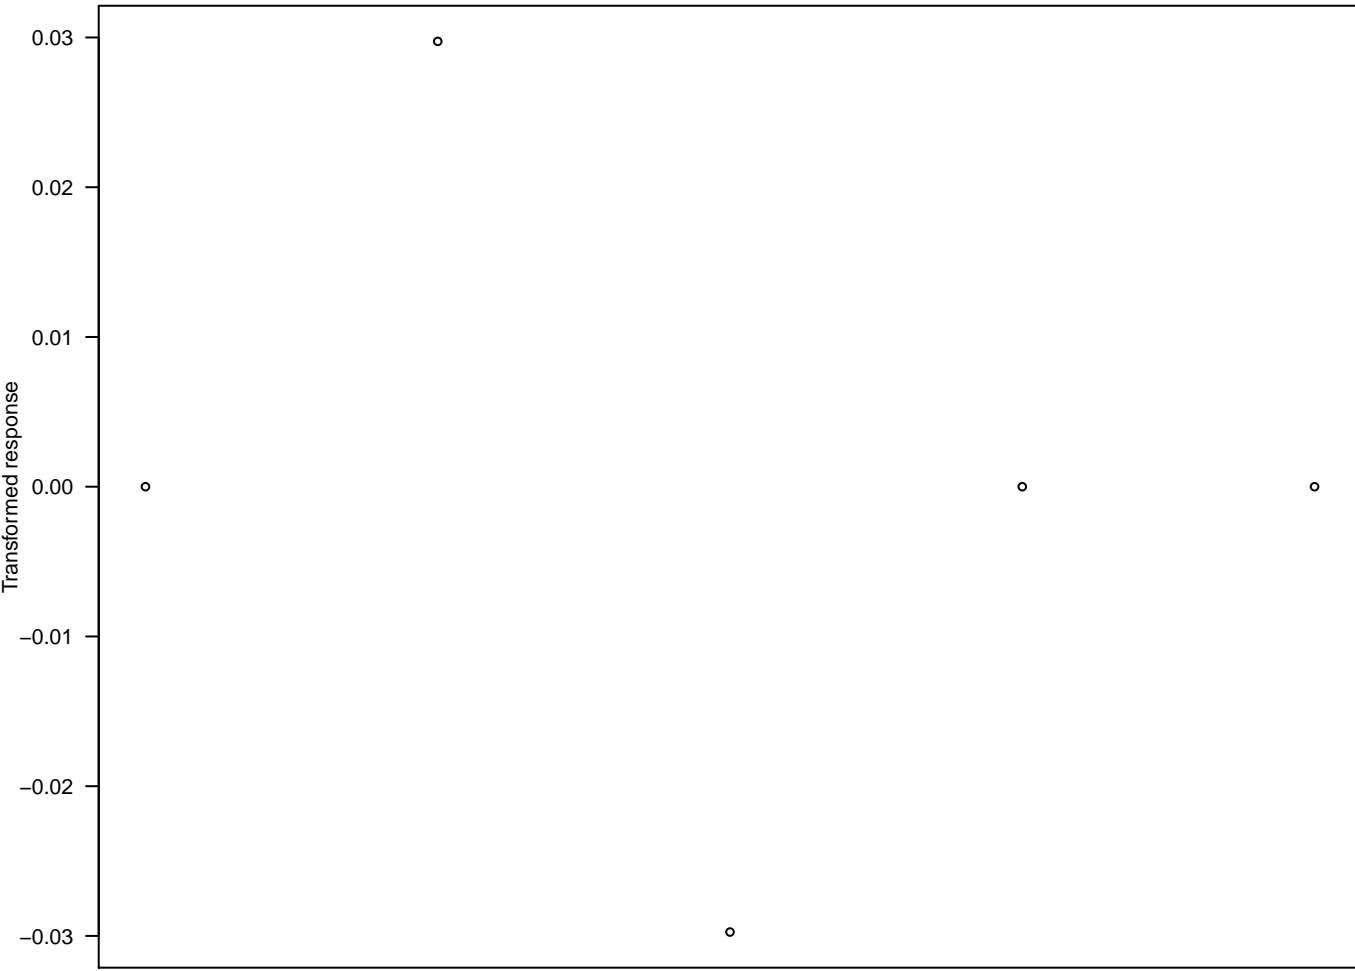

MRC Harwell

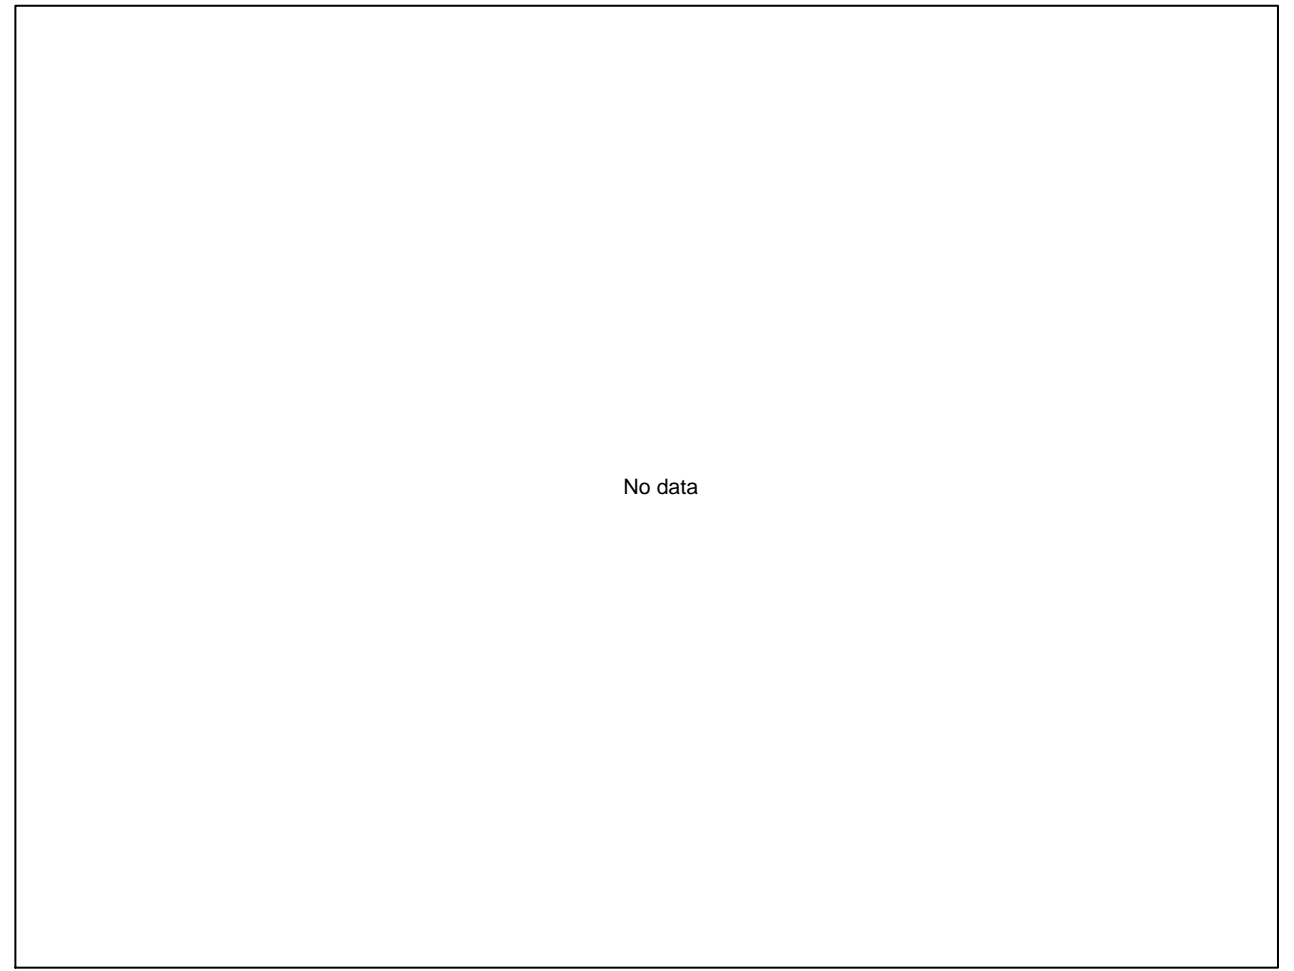

WTSI

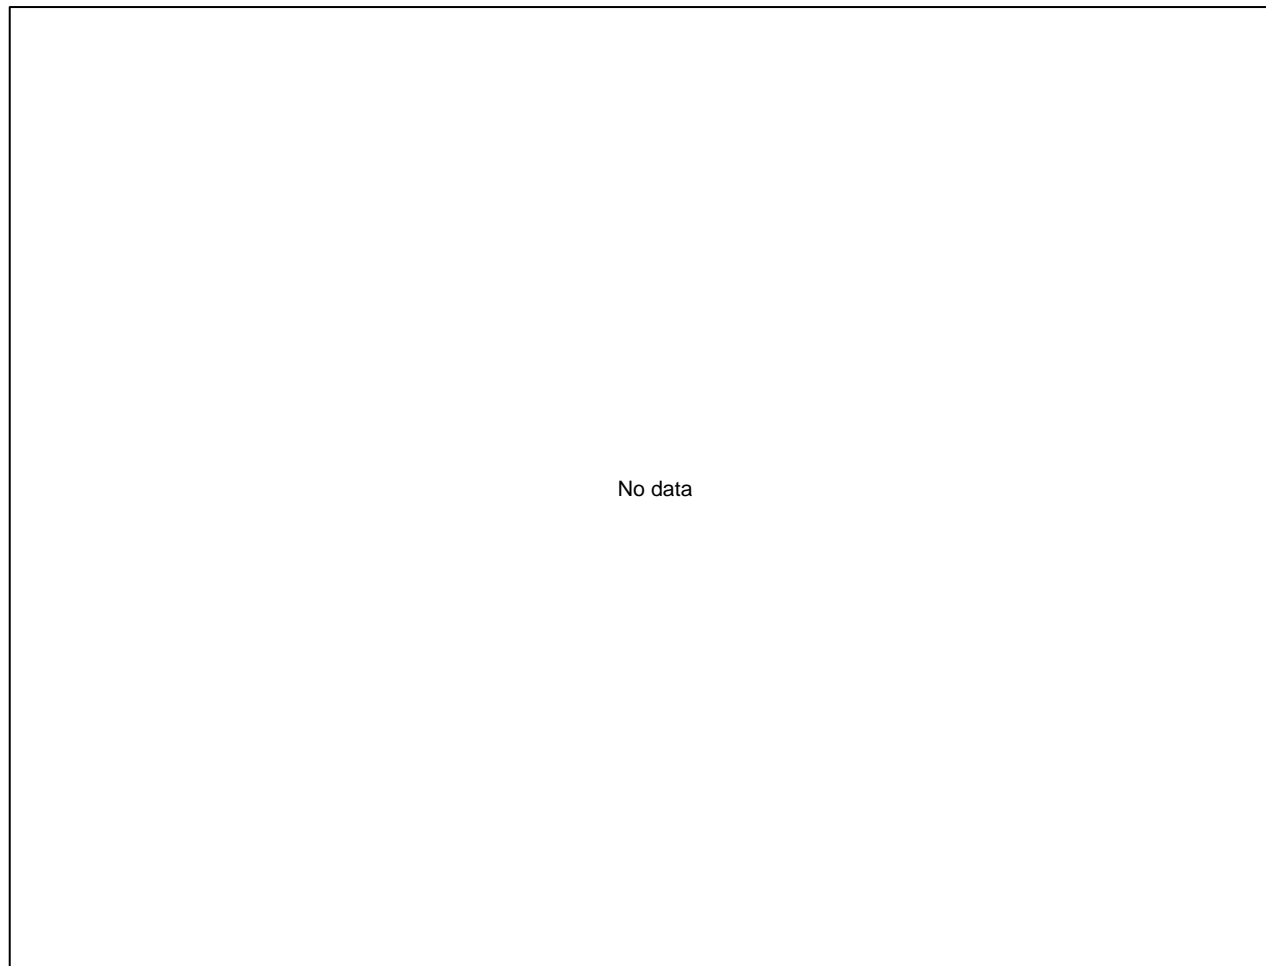

ICS



Transferrin  
(Clinical Chemistry)

HMGU

MRC Harwell

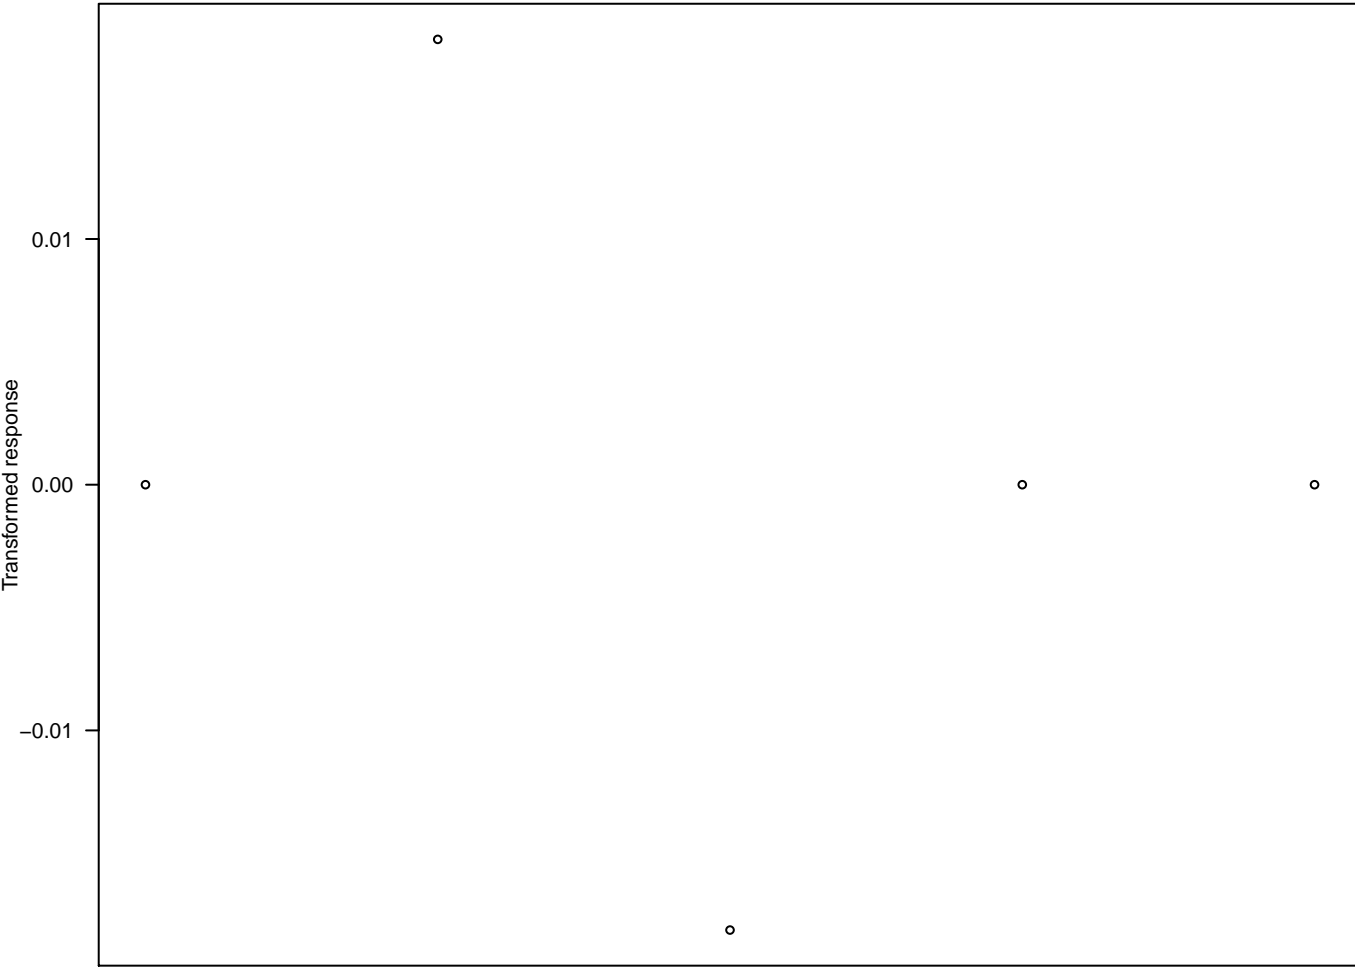

WTSI

ICS

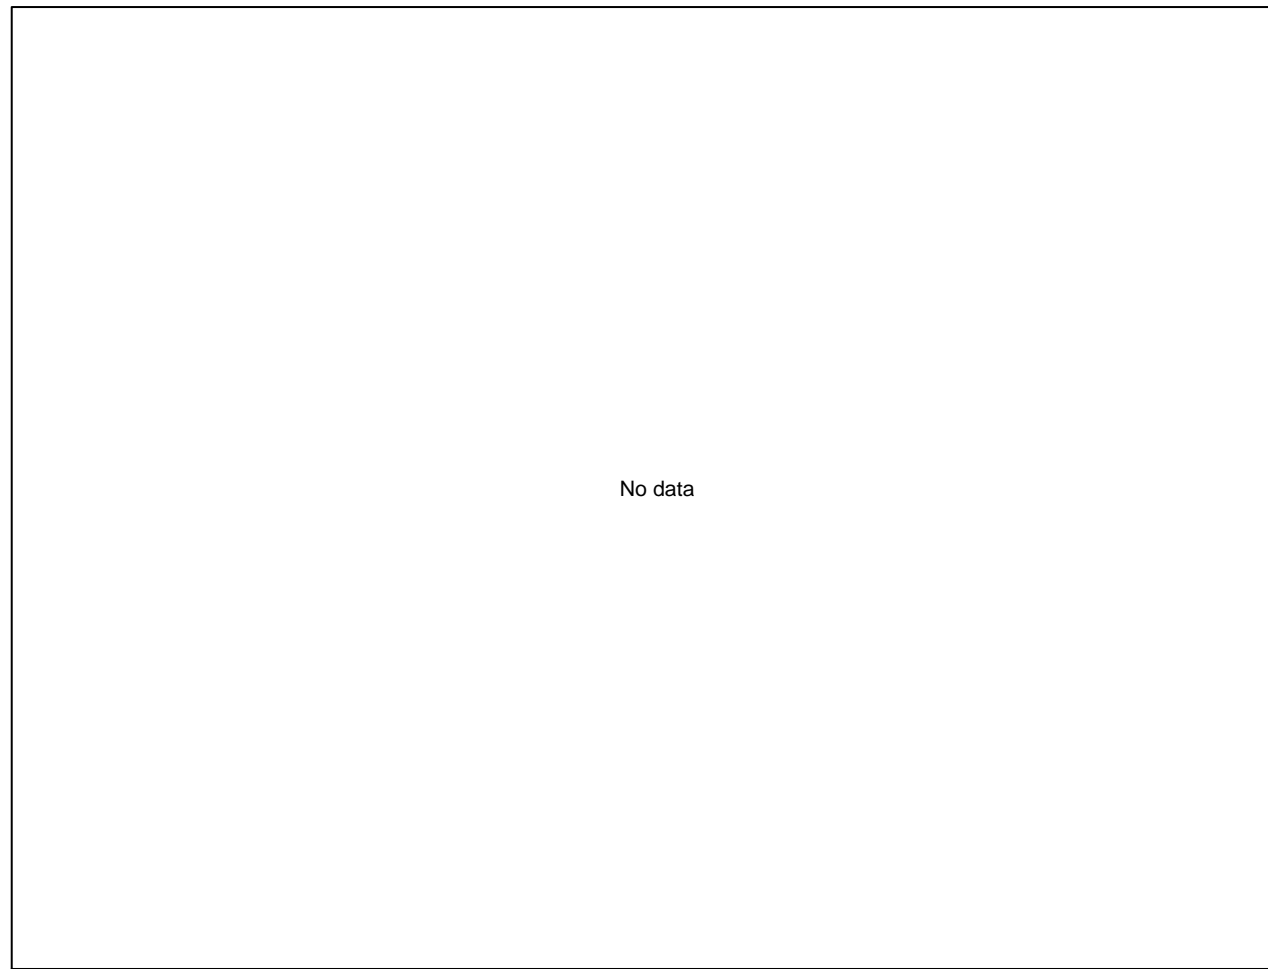

White blood cell count  
(Haematology)

HMGU

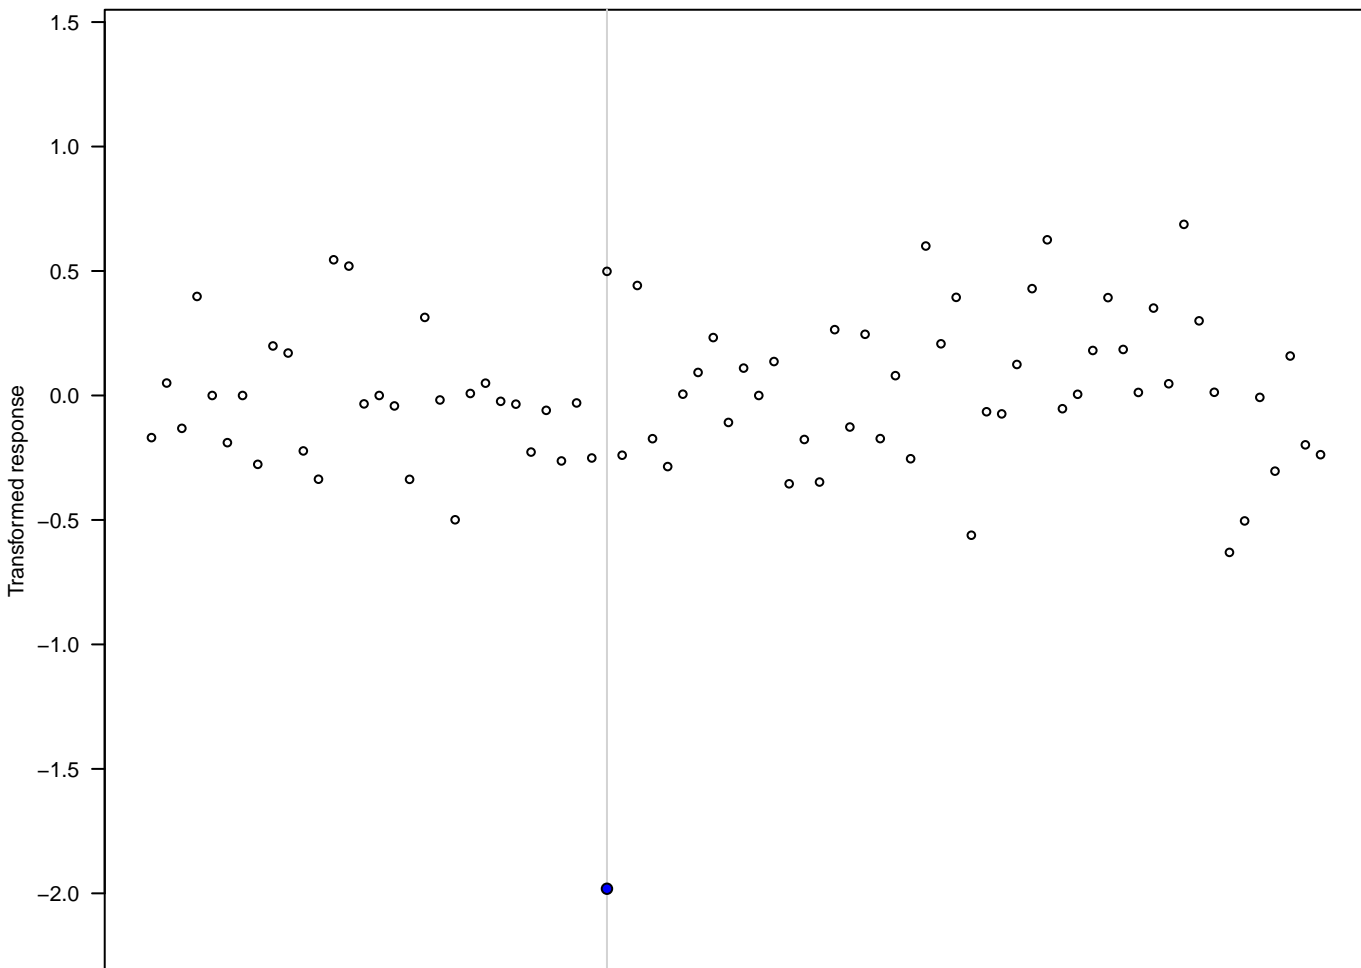

MRC Harwell

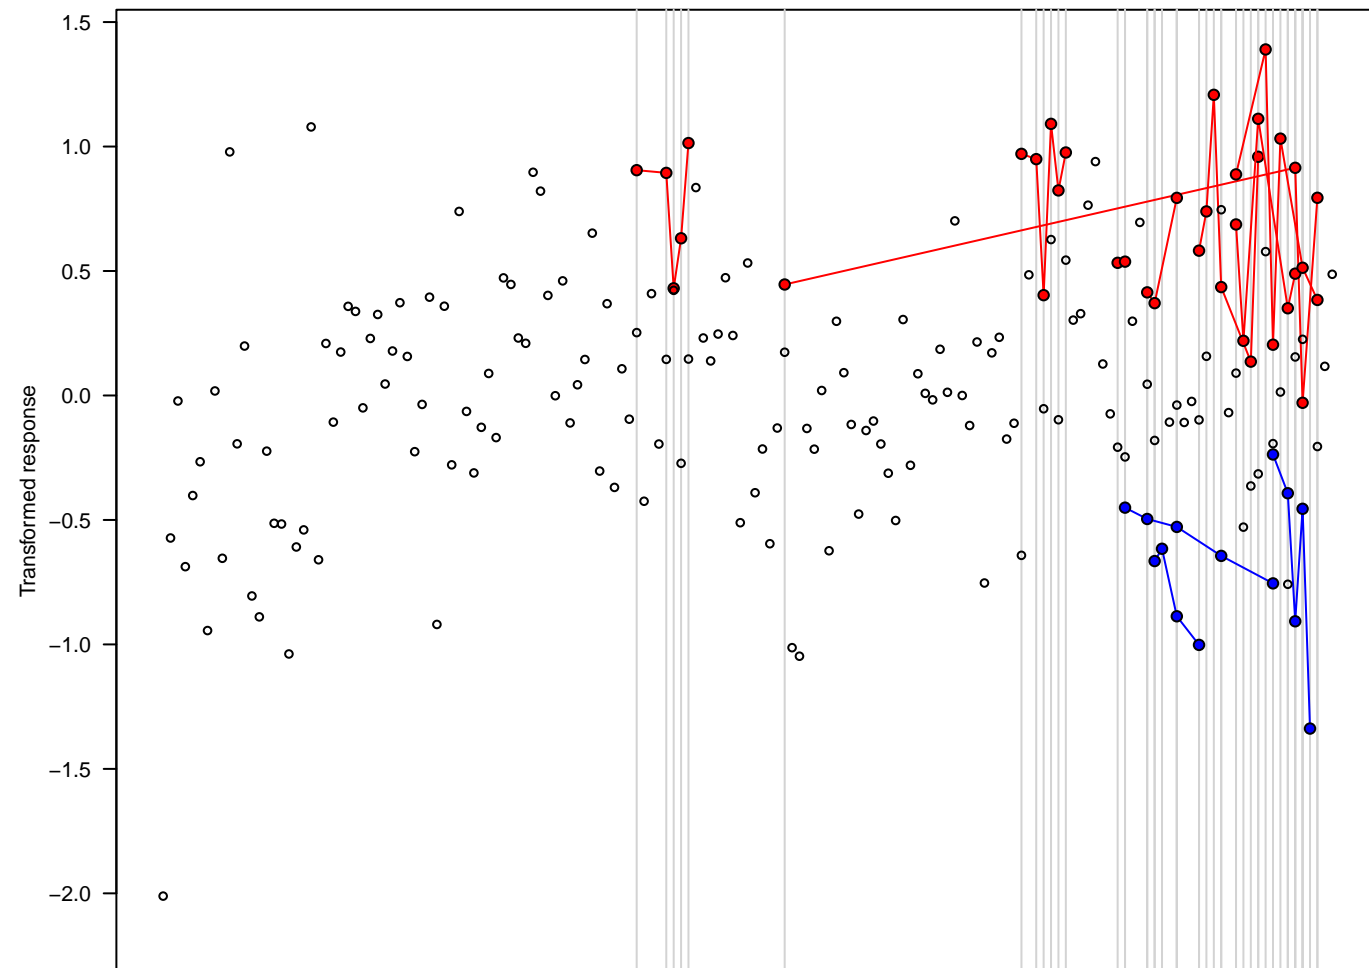

WTSI

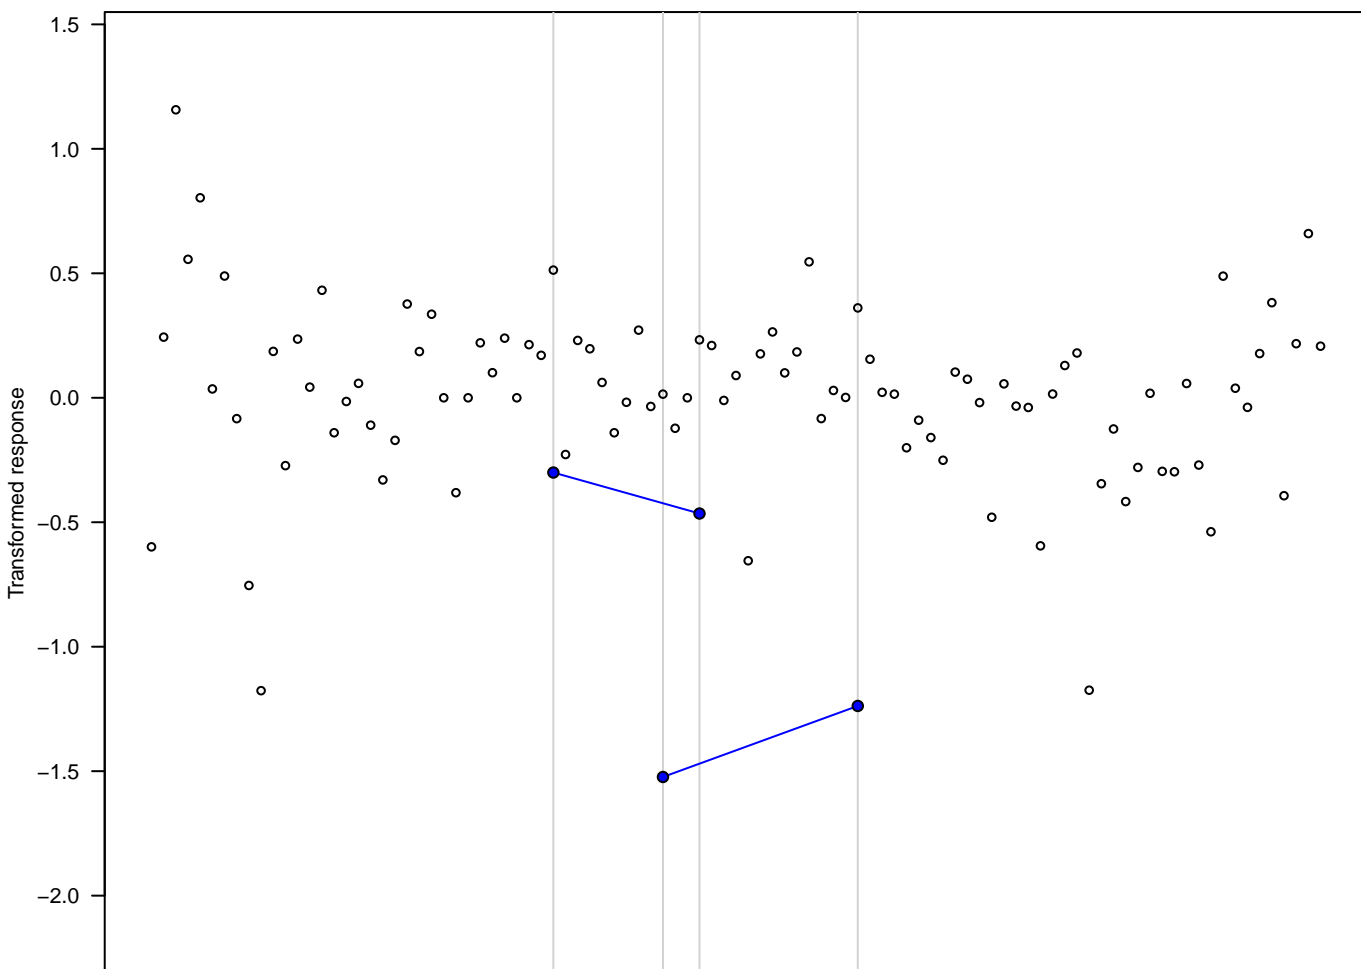

ICS

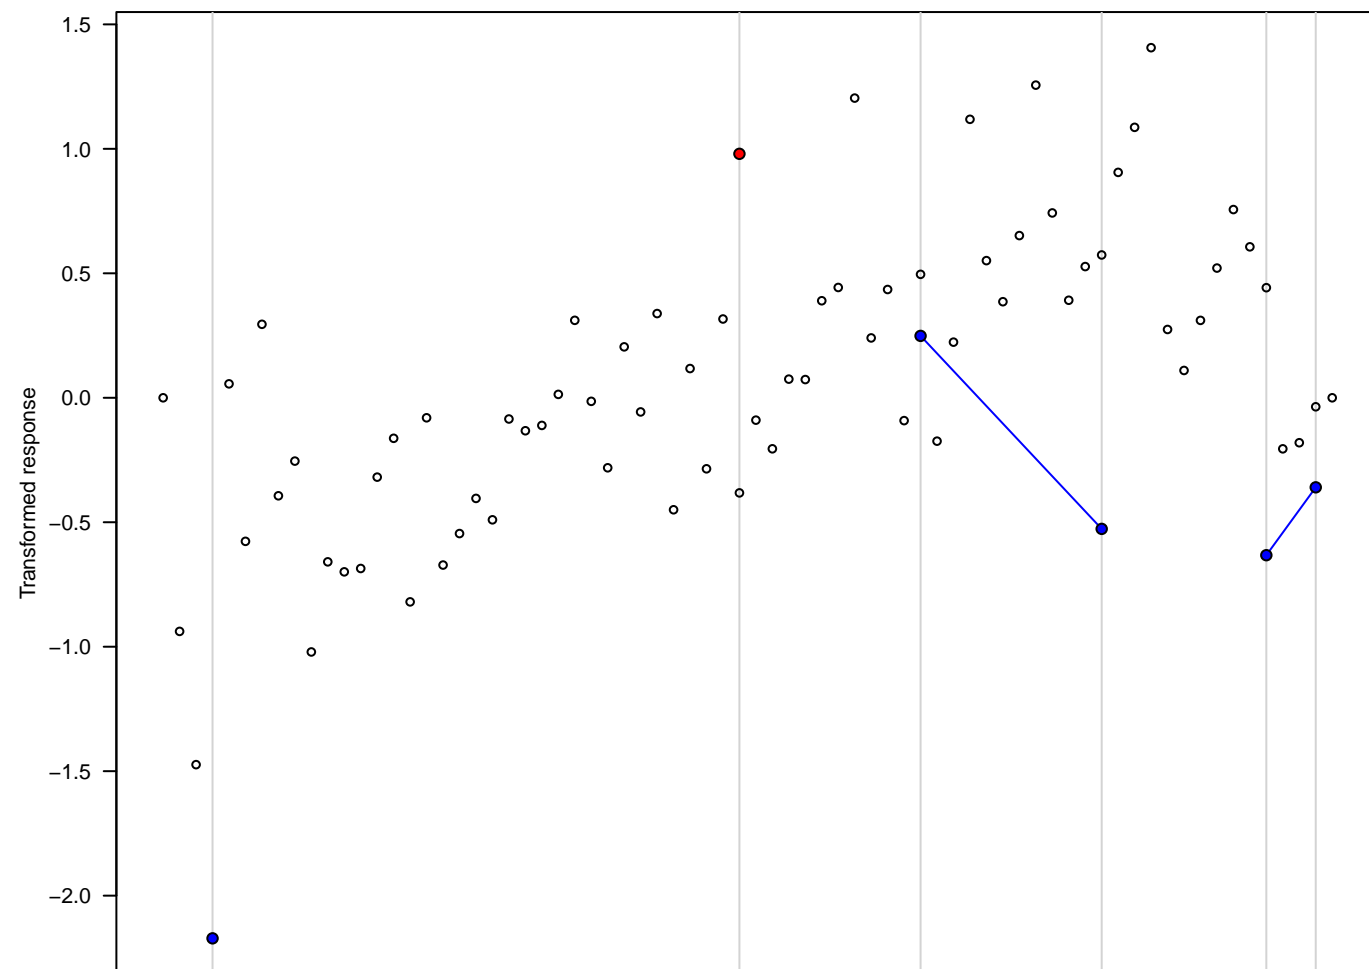



Red blood cell count  
(Haematology)

HMGU

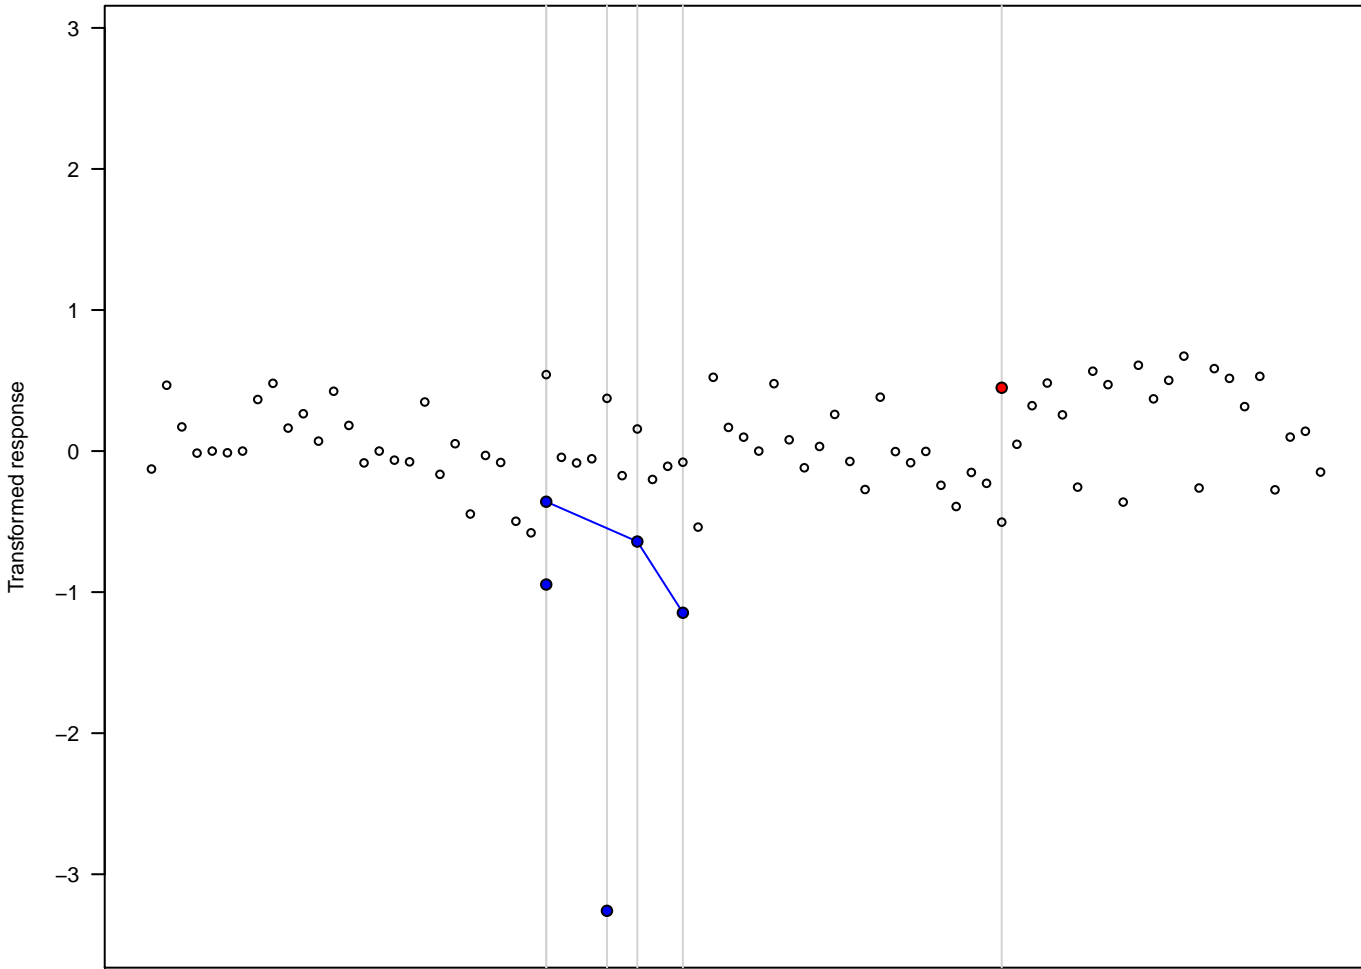

MRC Harwell

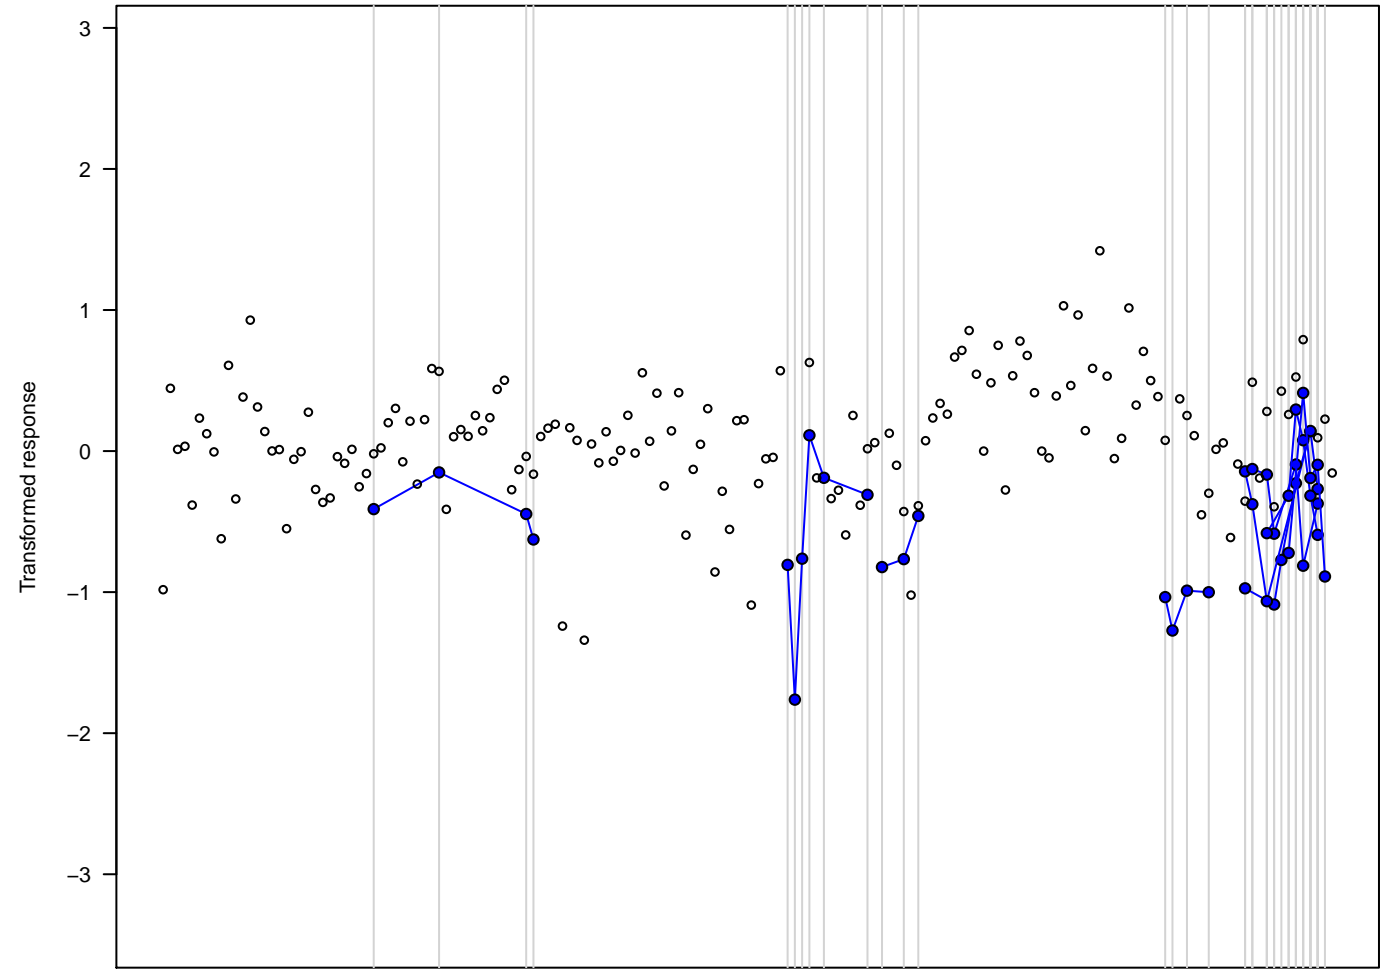

WTSI

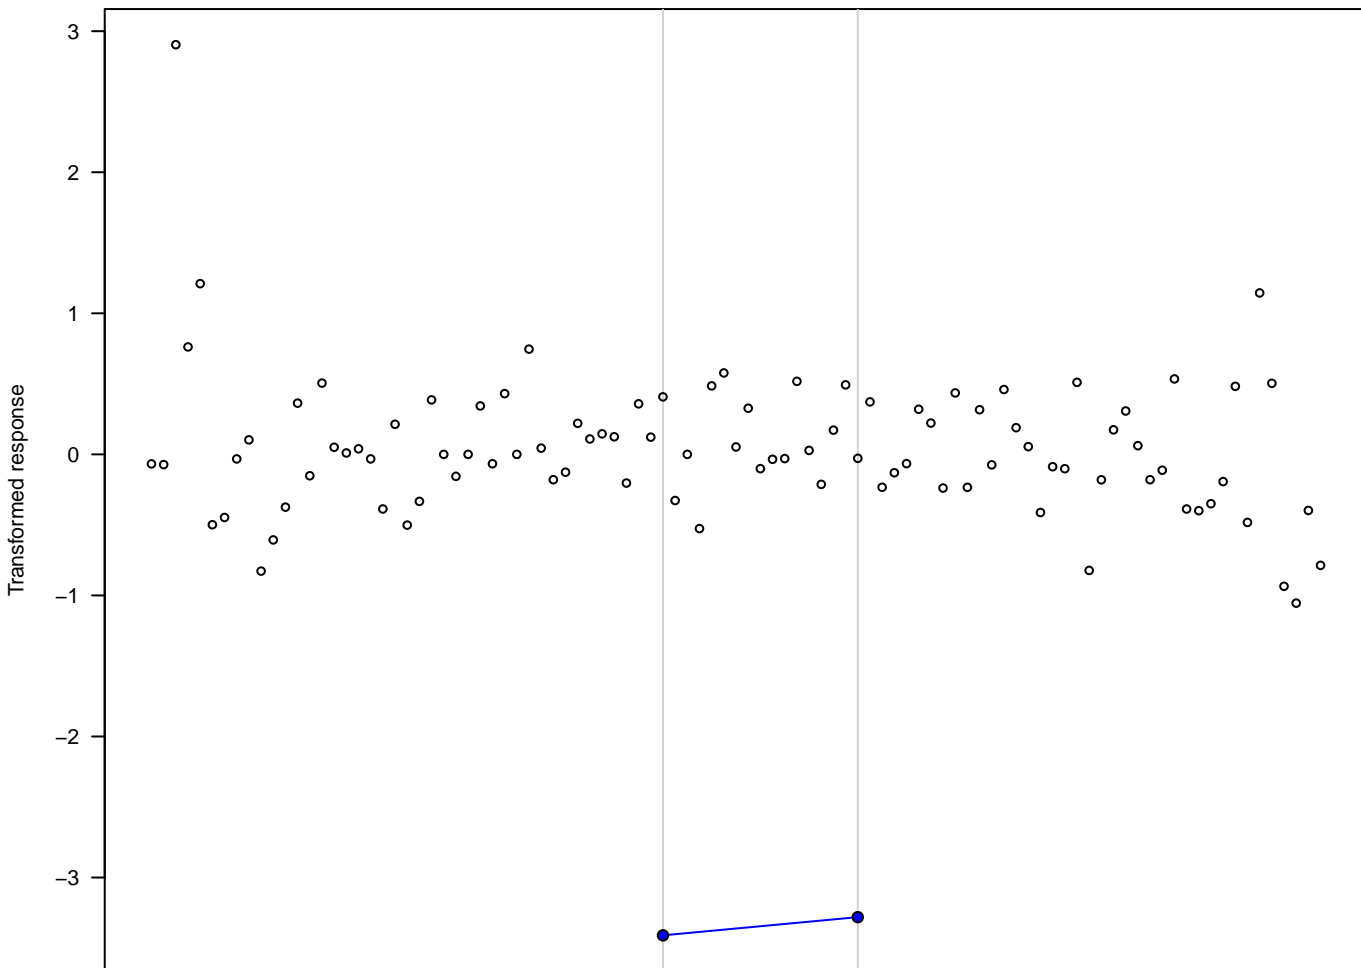

ICS

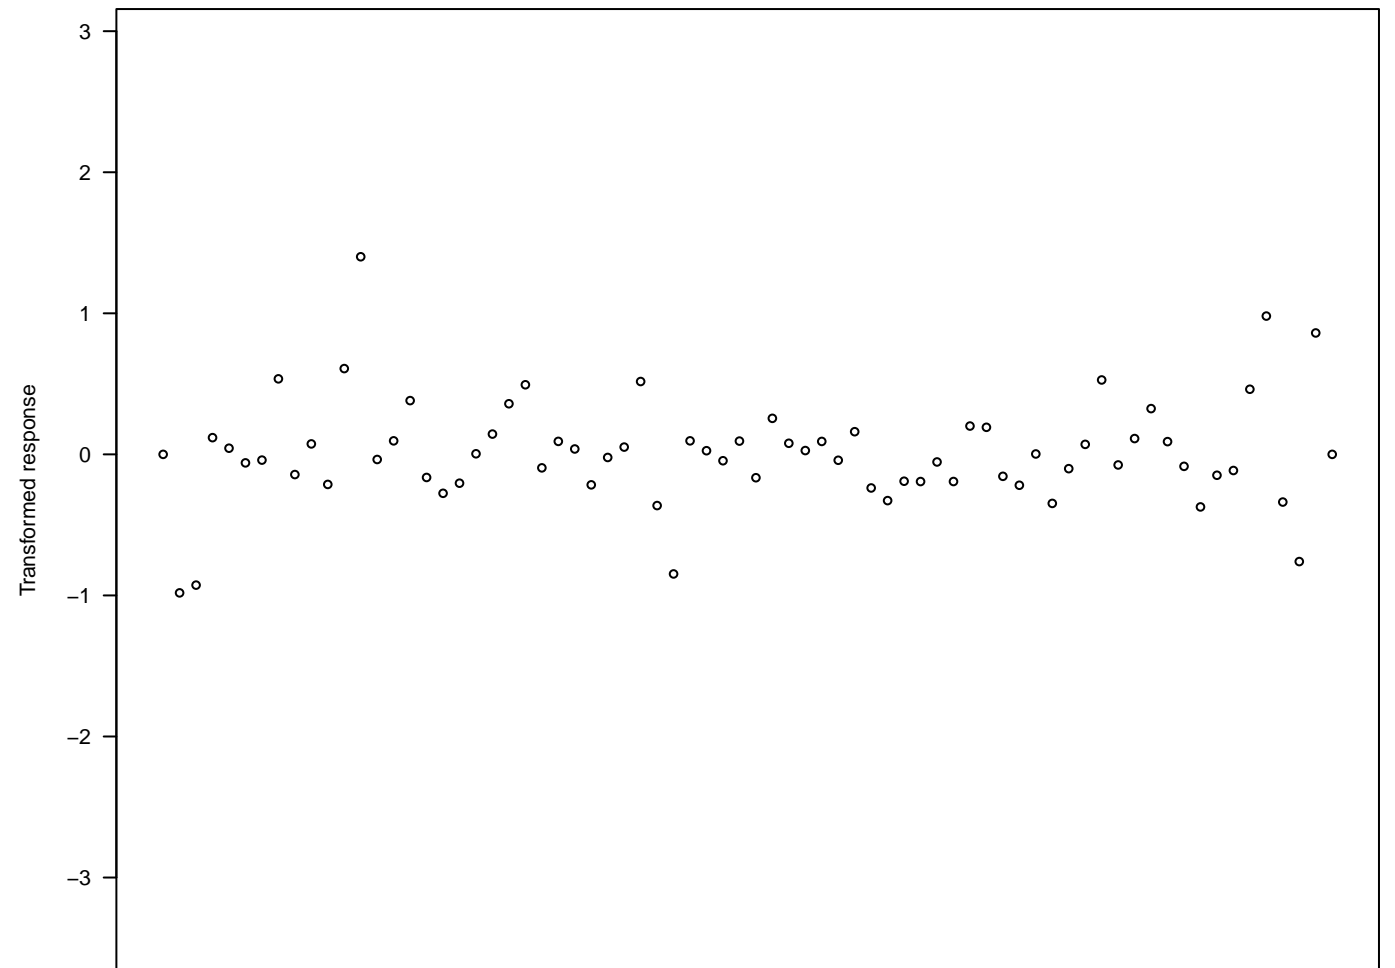

# Haemoglobin (Haematology)

## HMGU

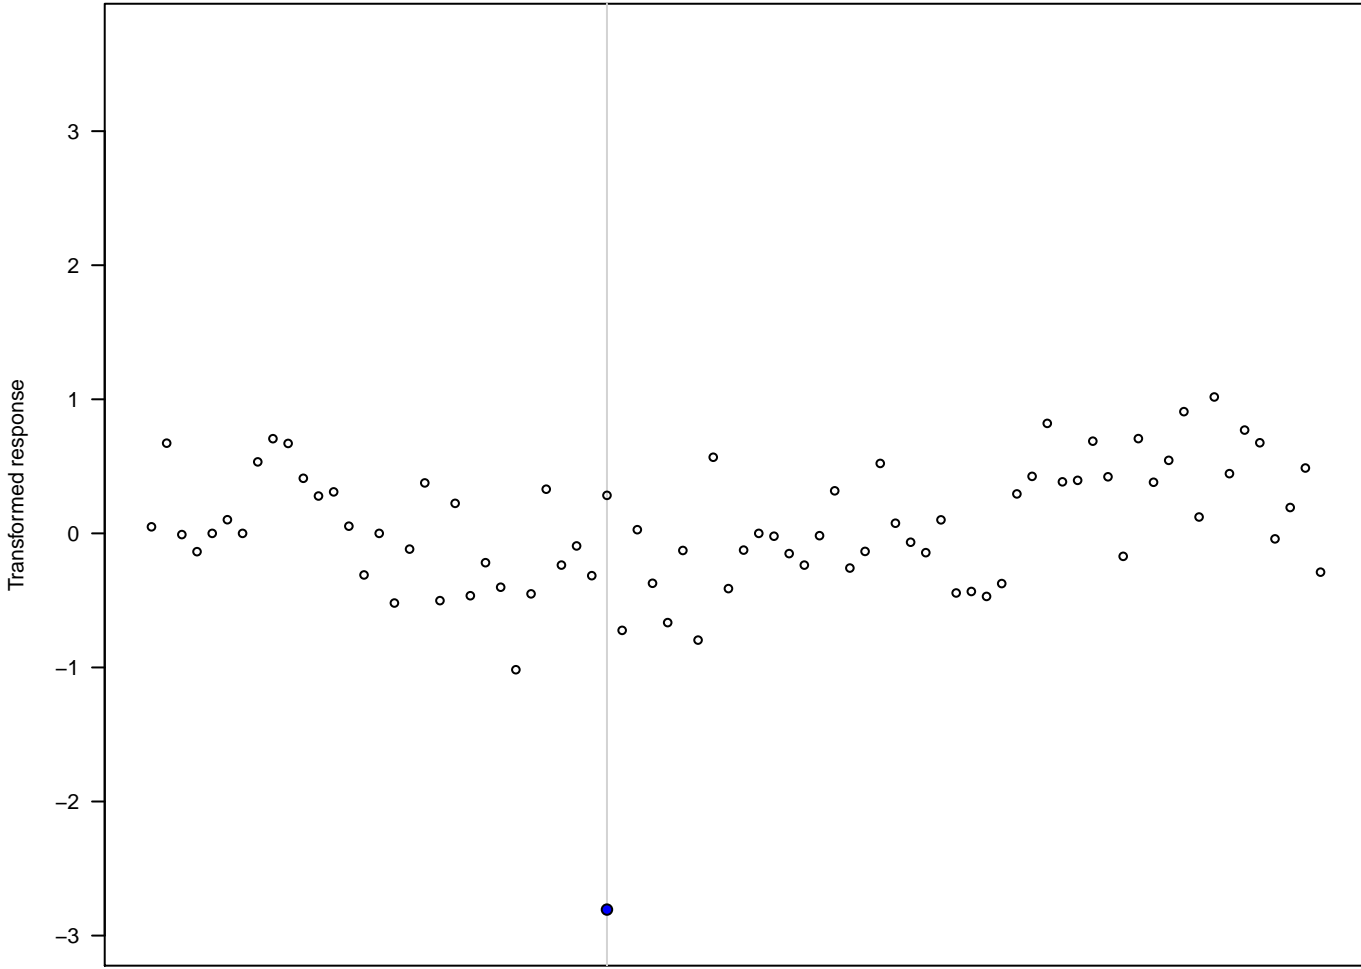

## MRC Harwell

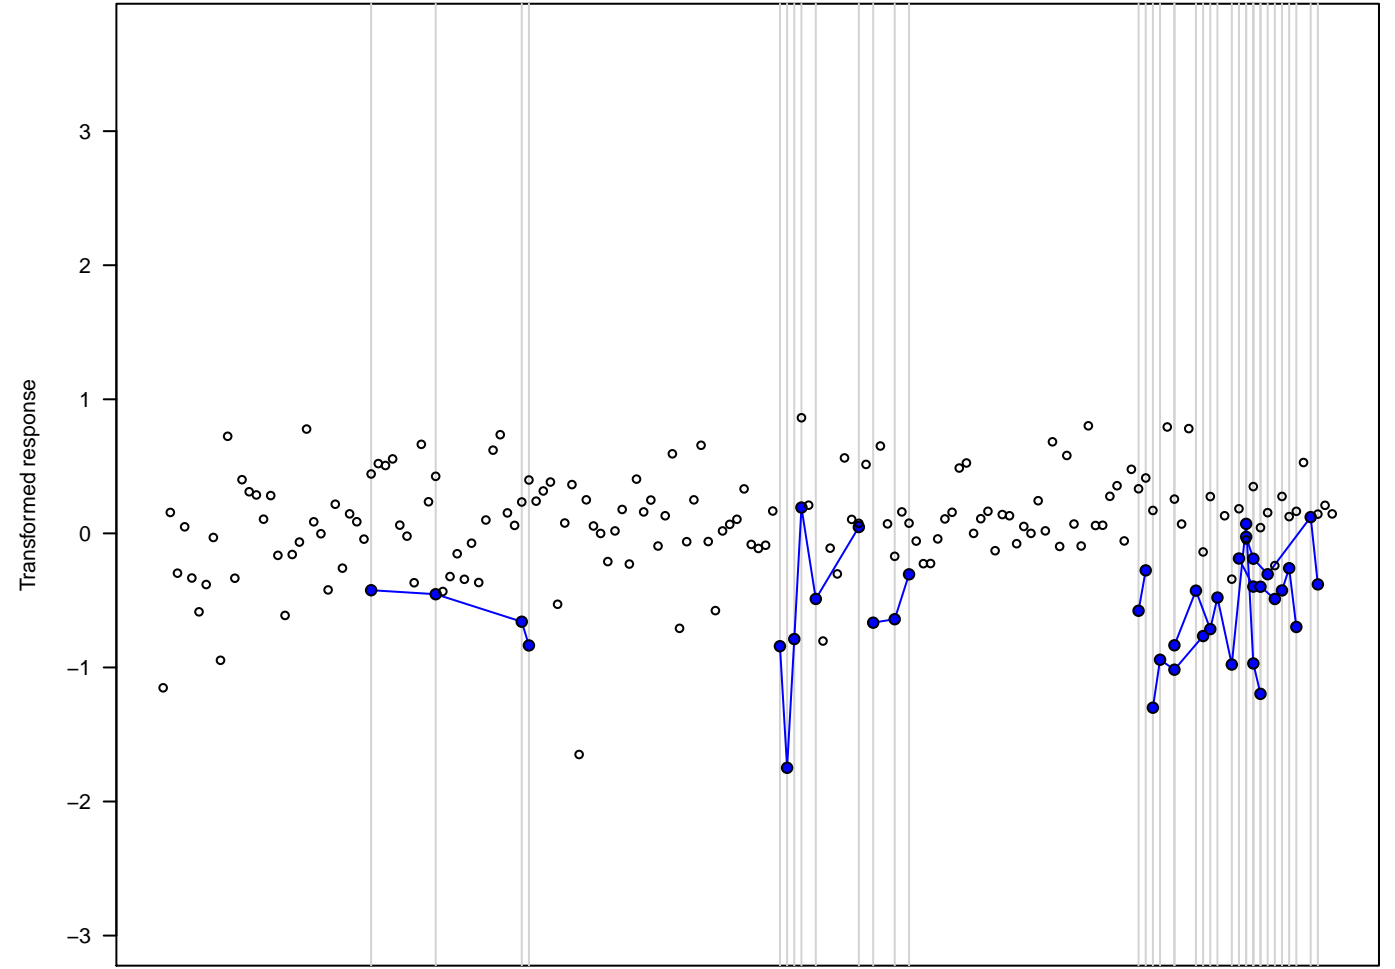

## WTSI

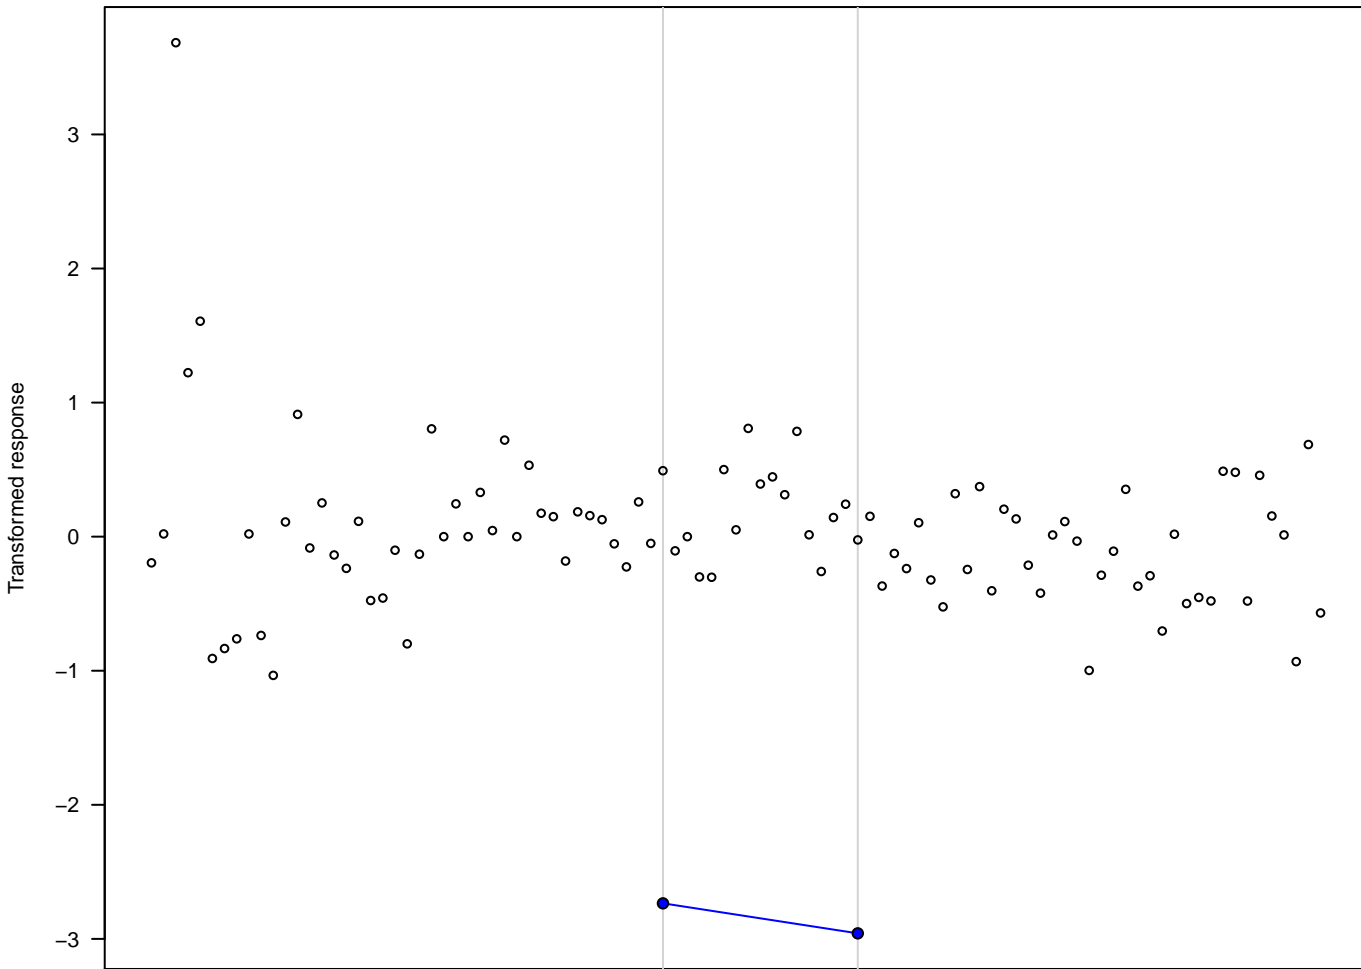

## ICS

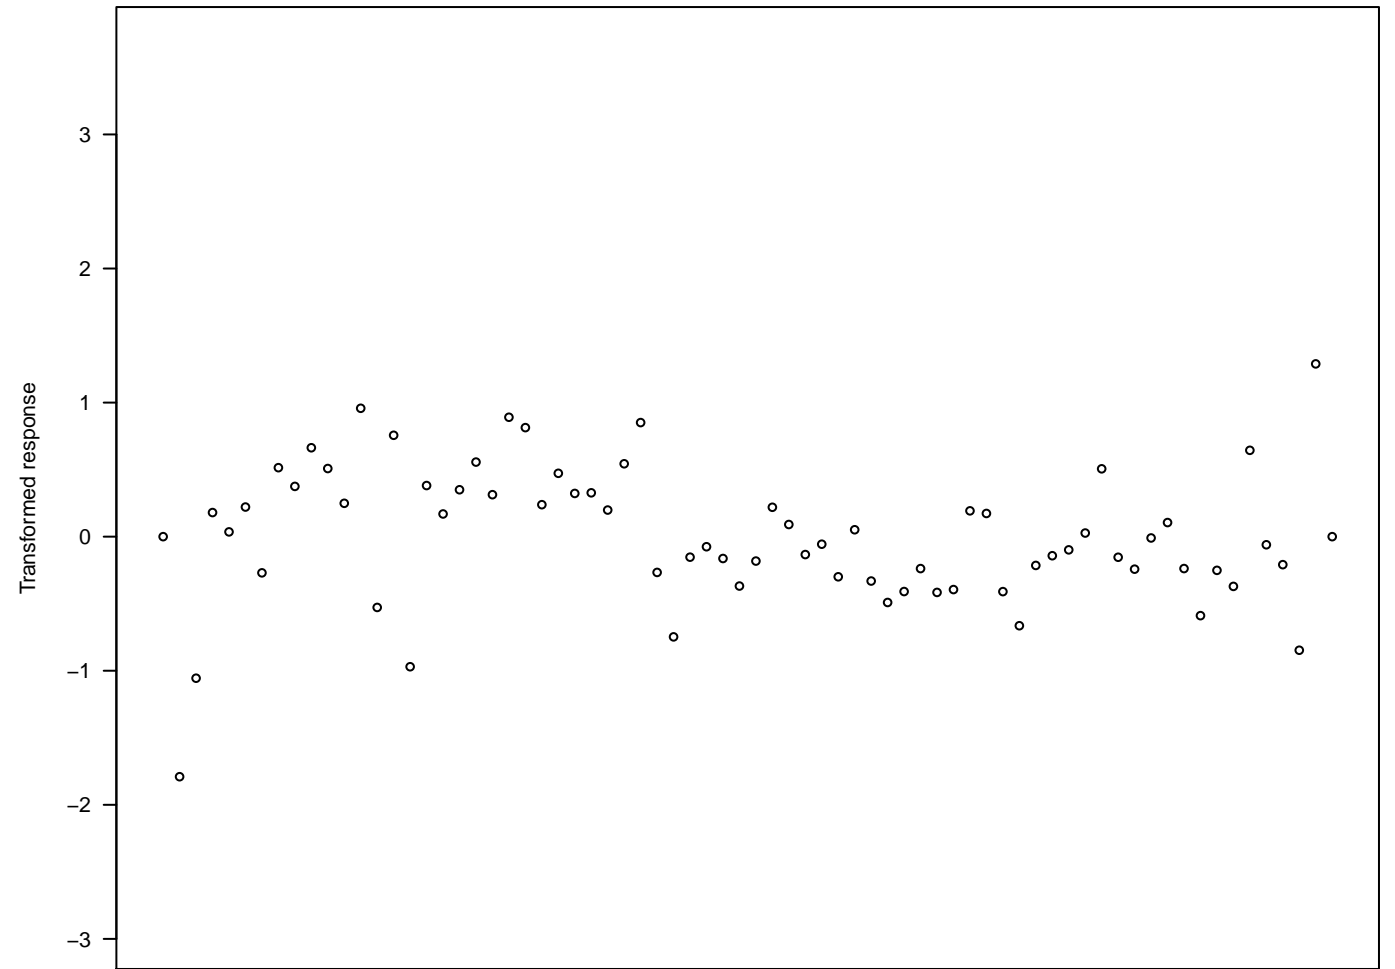

# Haematocrit (Haematology)

## HMGU

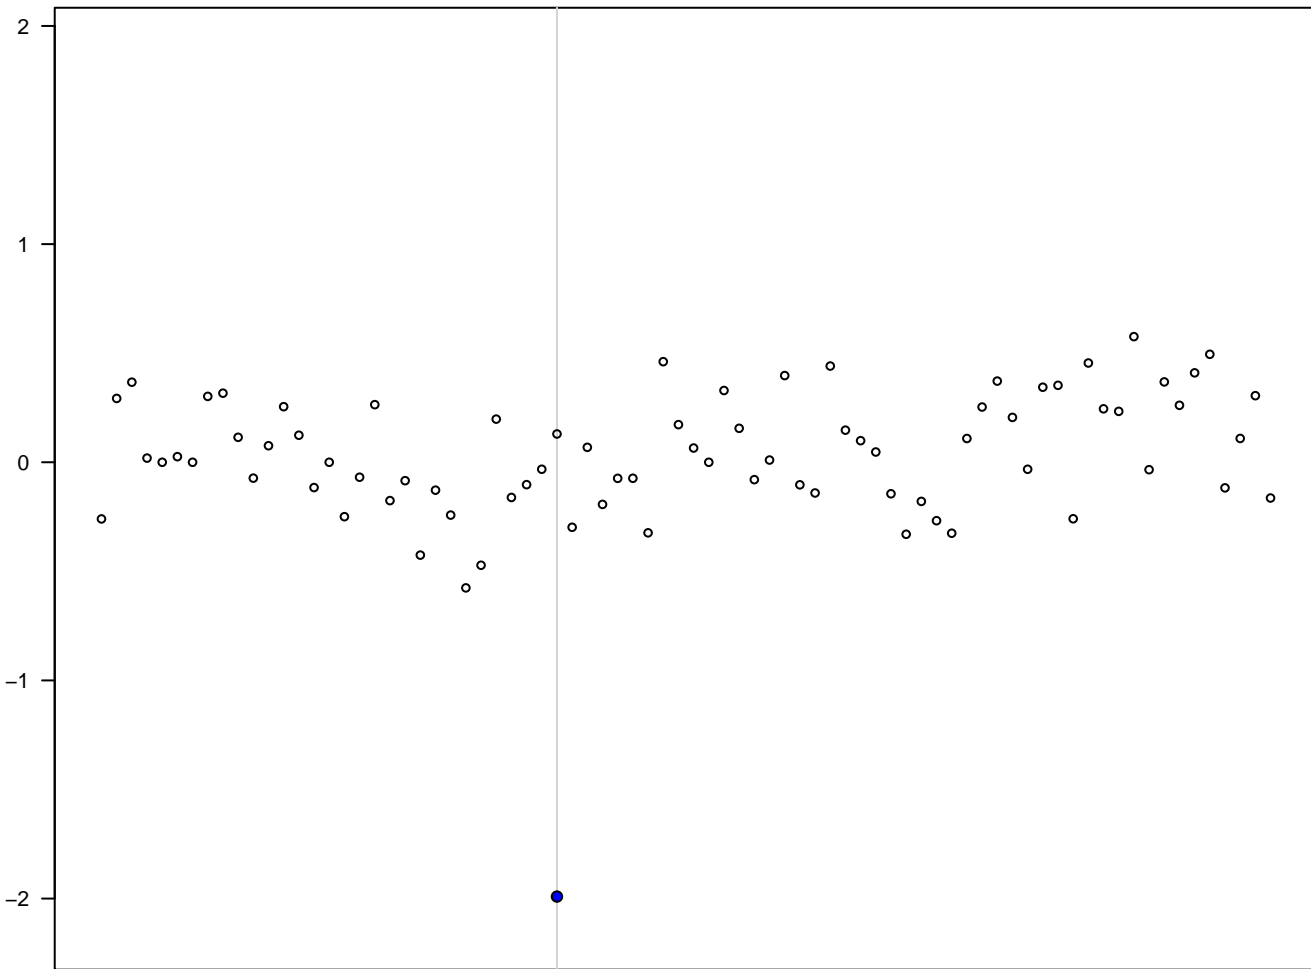

## MRC Harwell

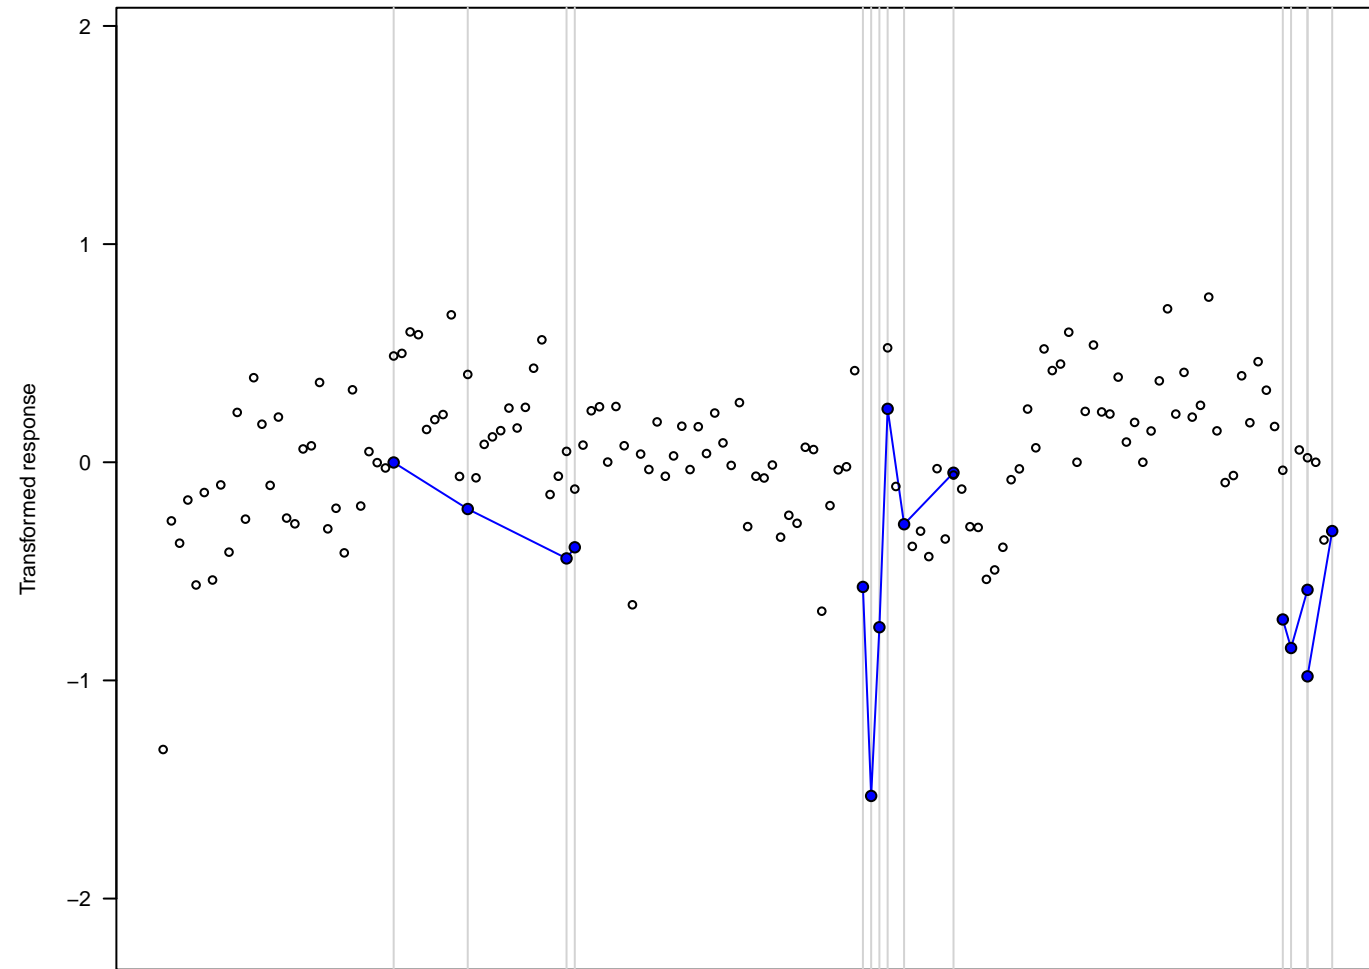

## WTSI

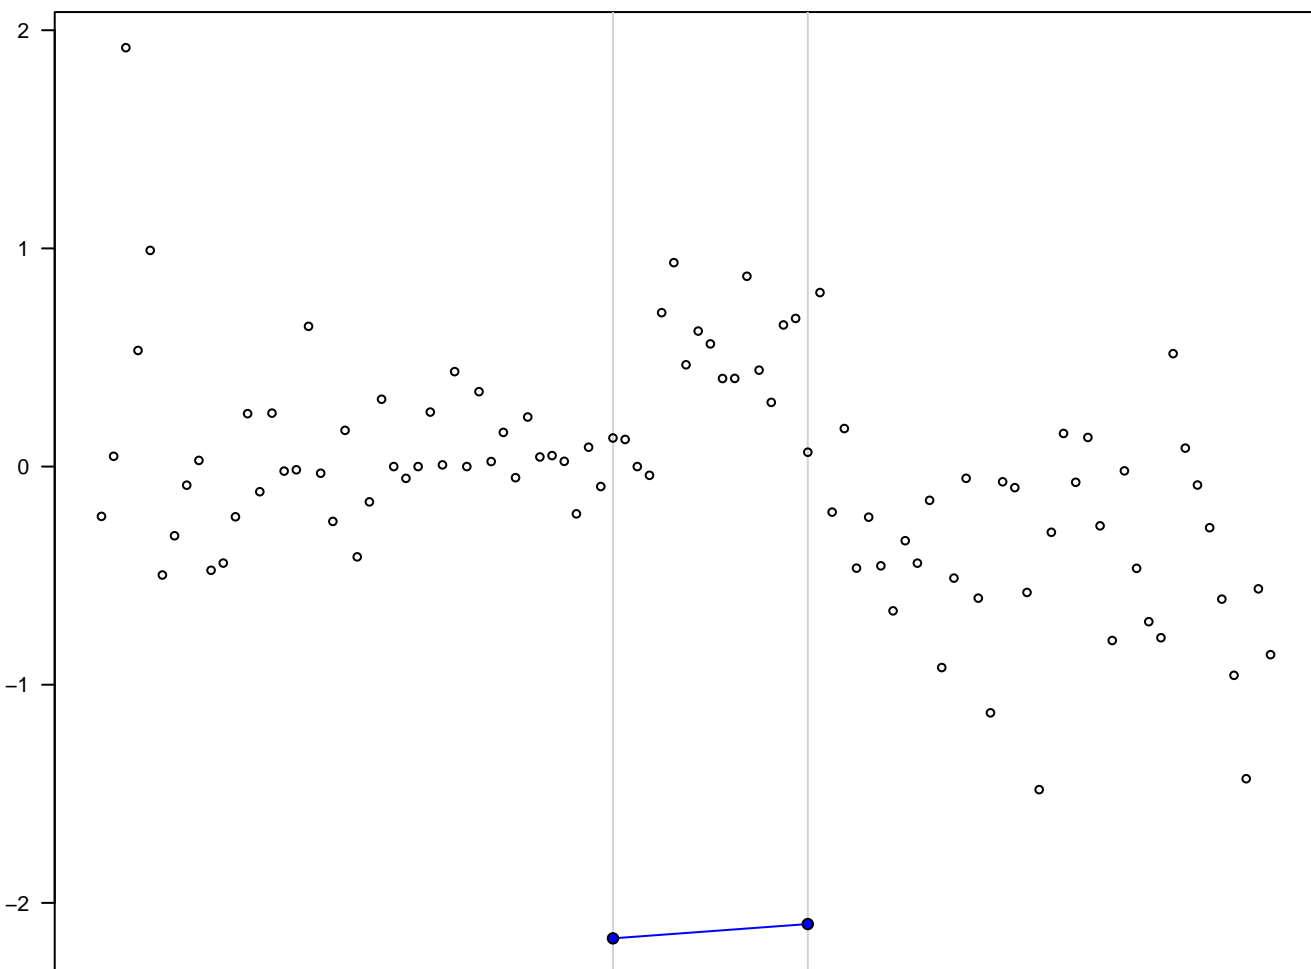

## ICS

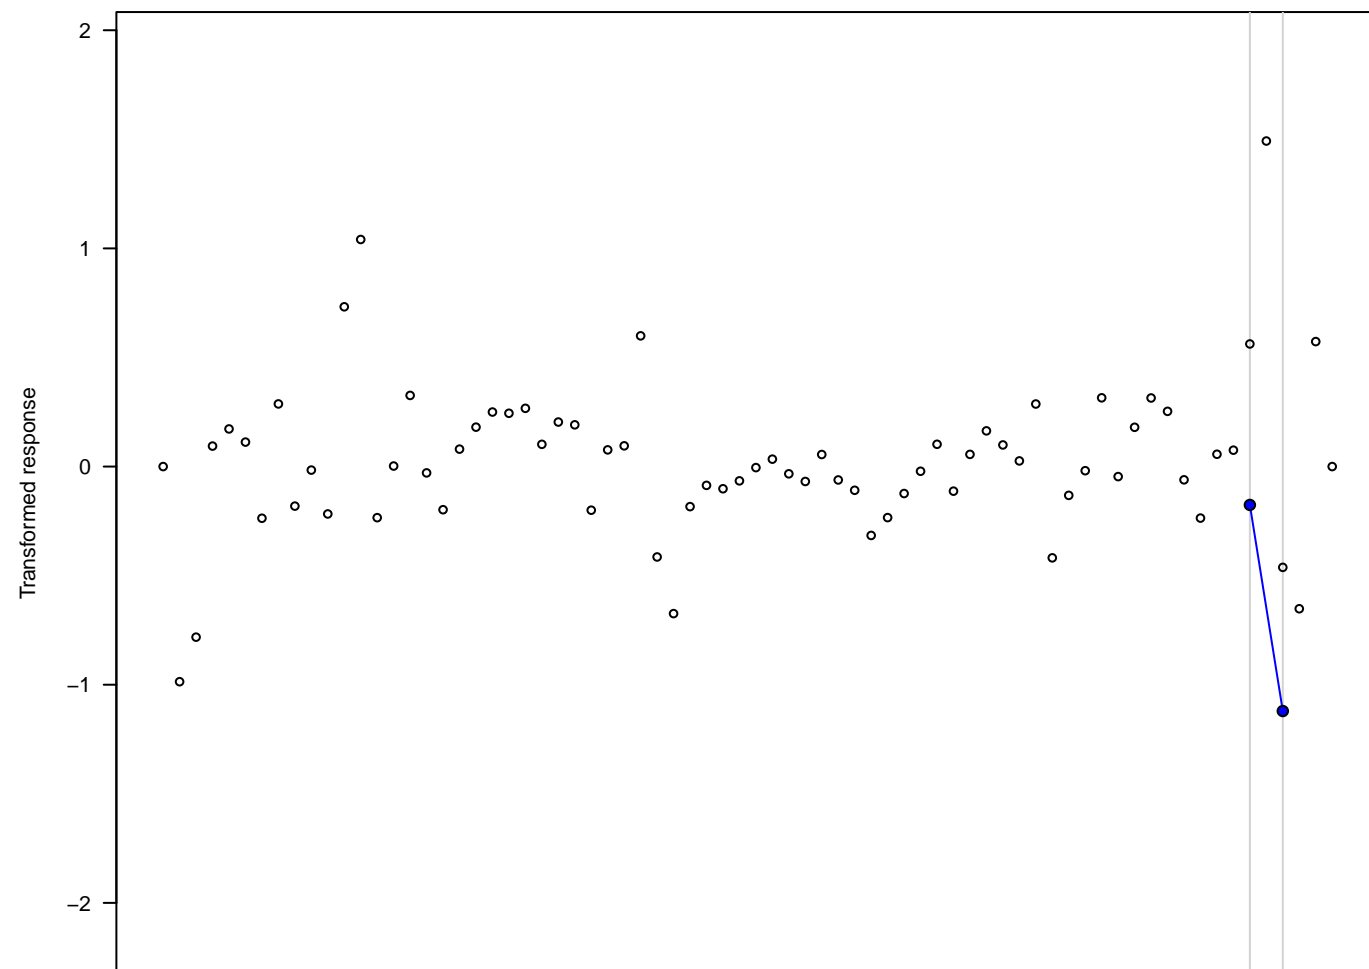

Mean cell volume  
(Haematology)

HMGU

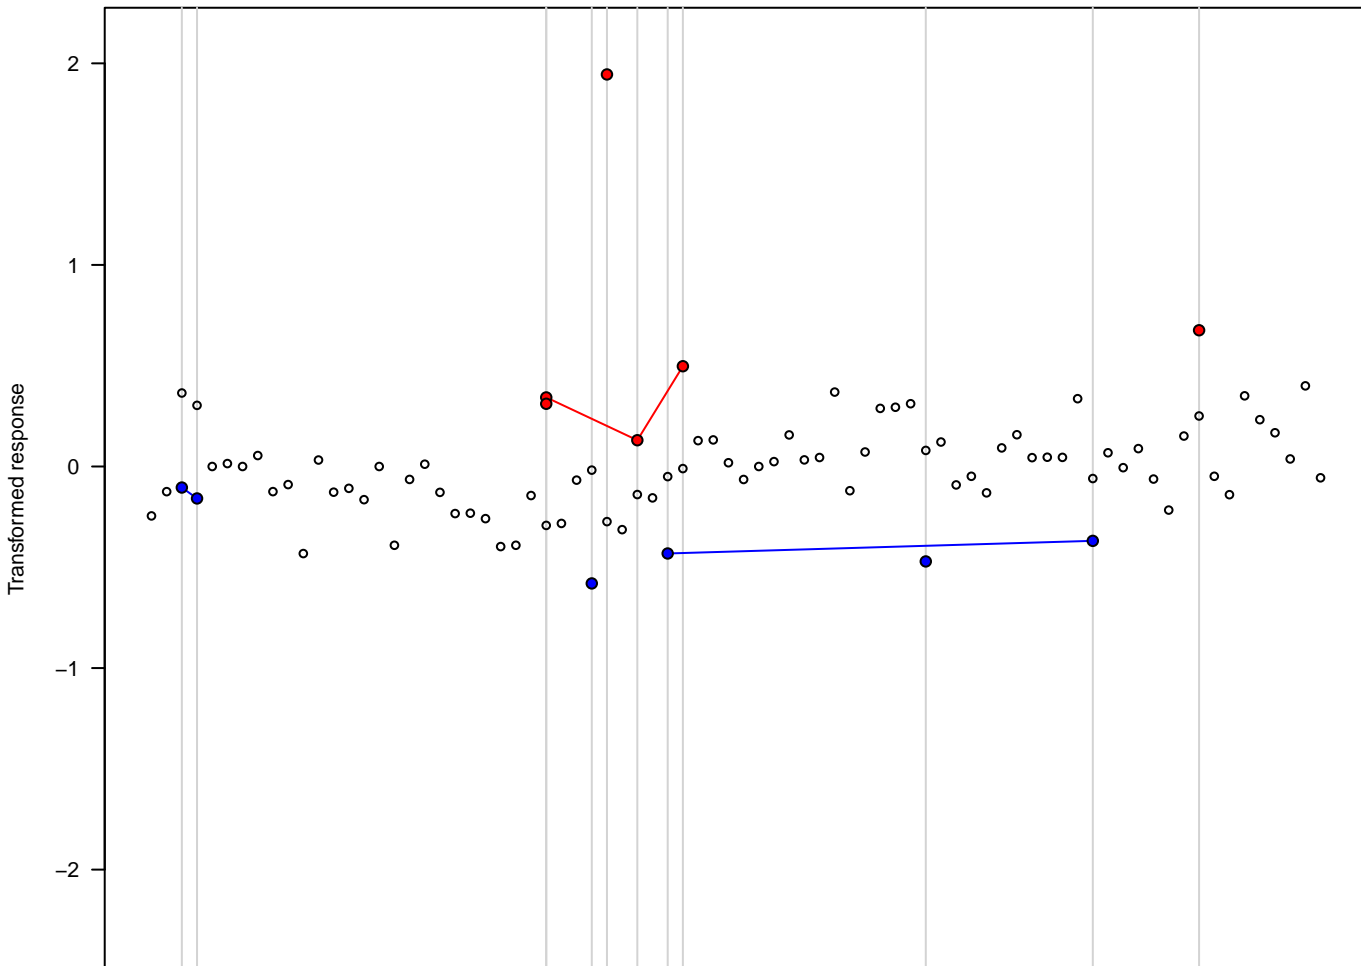

MRC Harwell

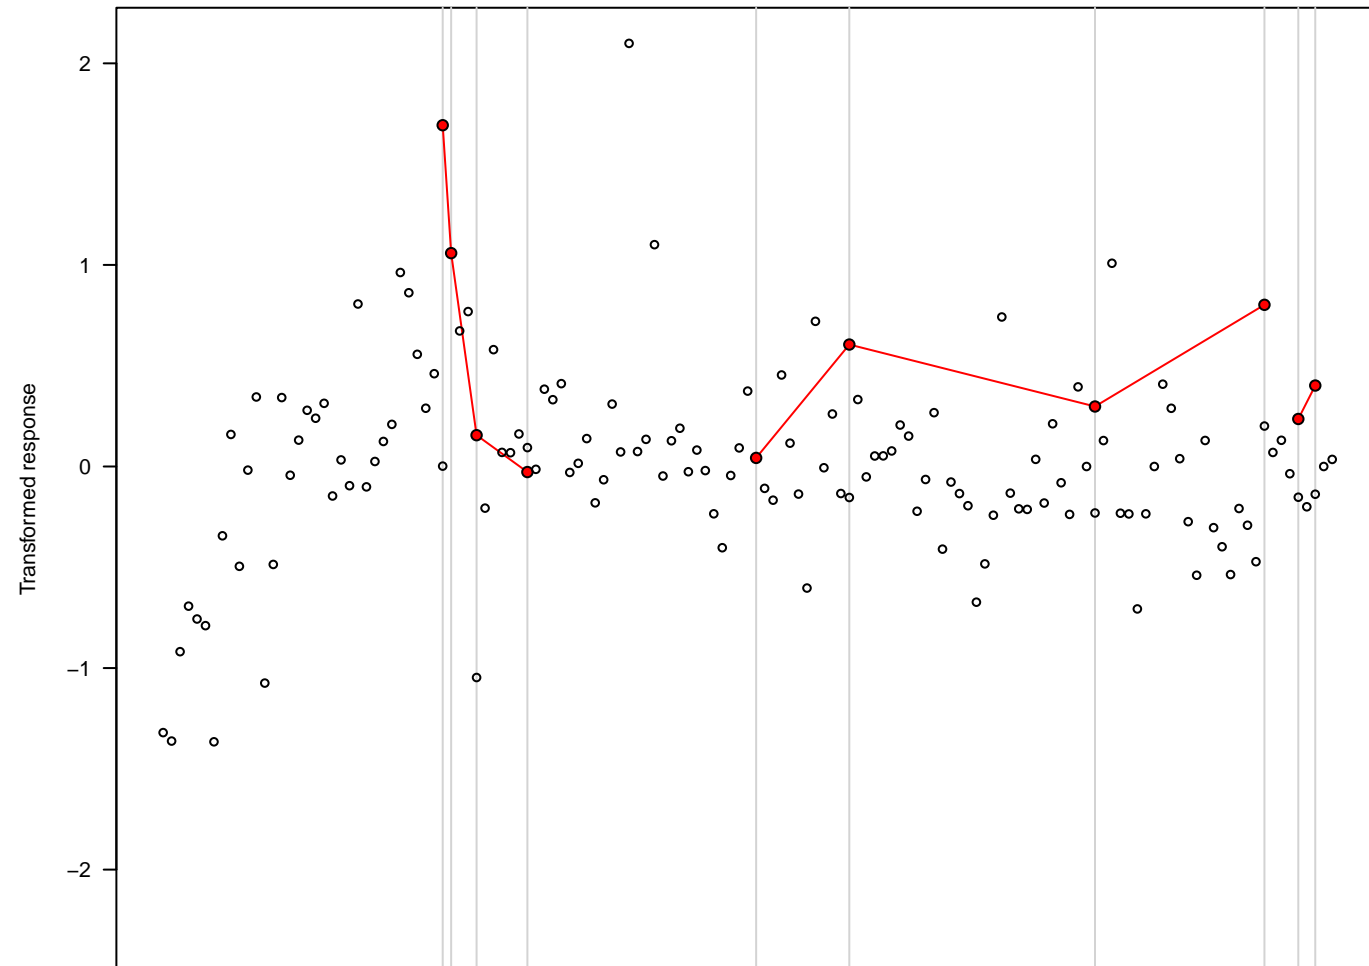

WTSI

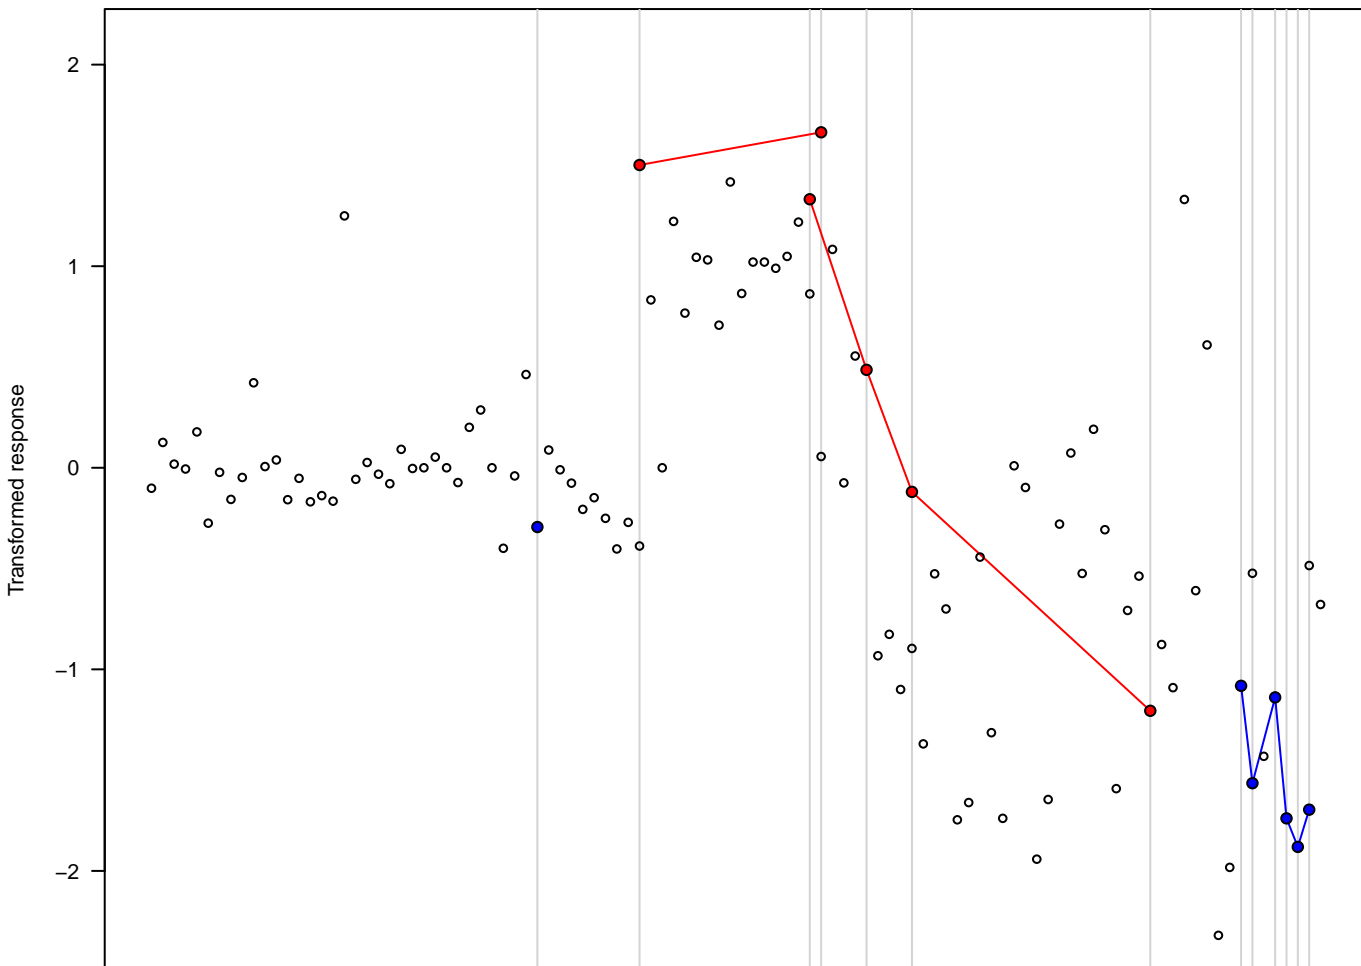

ICS

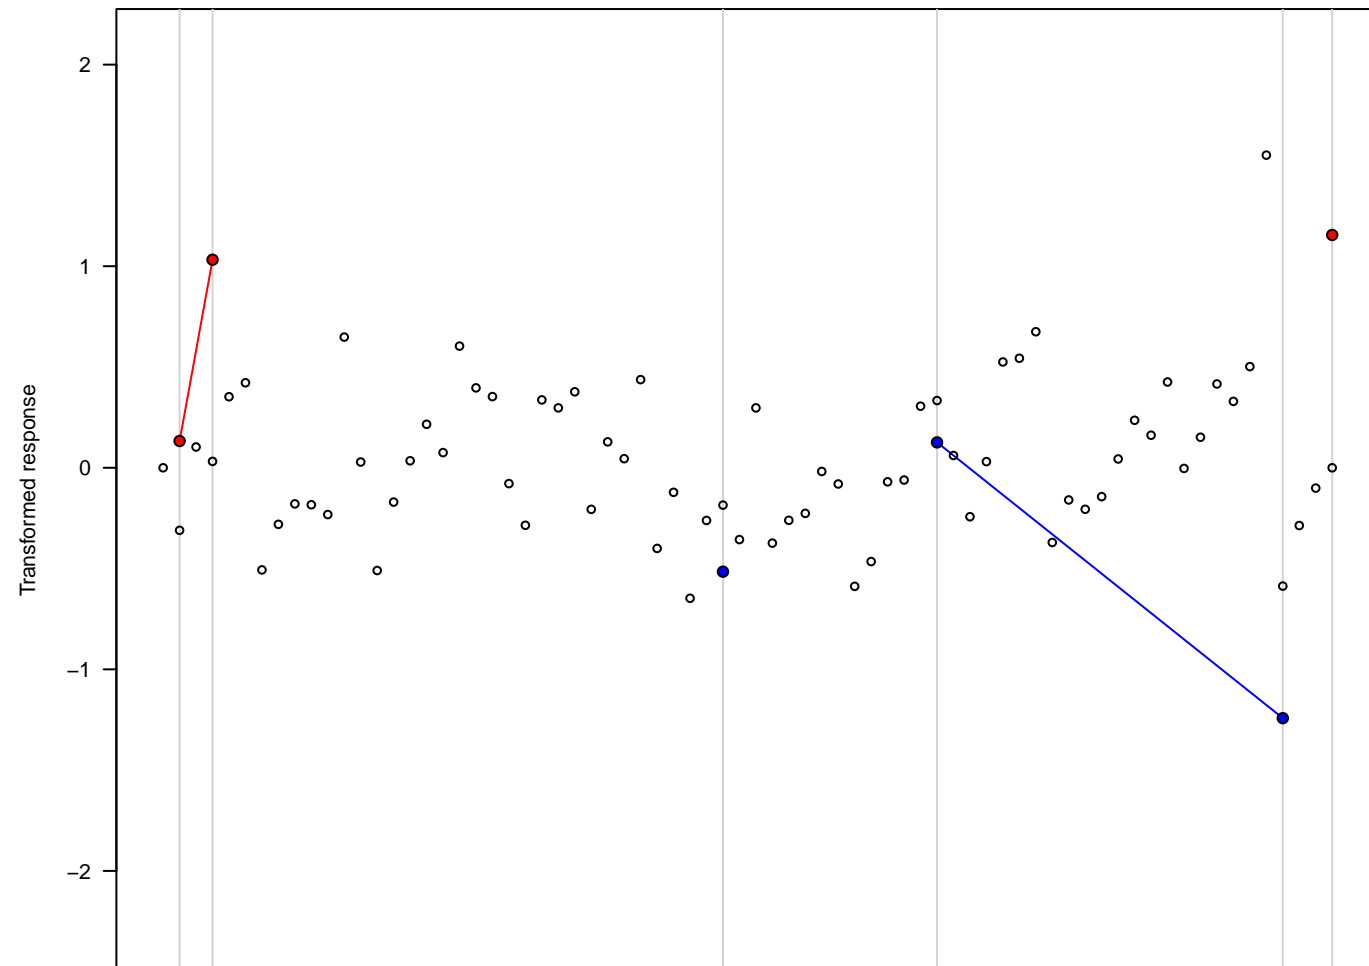

Mean corpuscular haemoglobin  
(Haematology)

HMGU

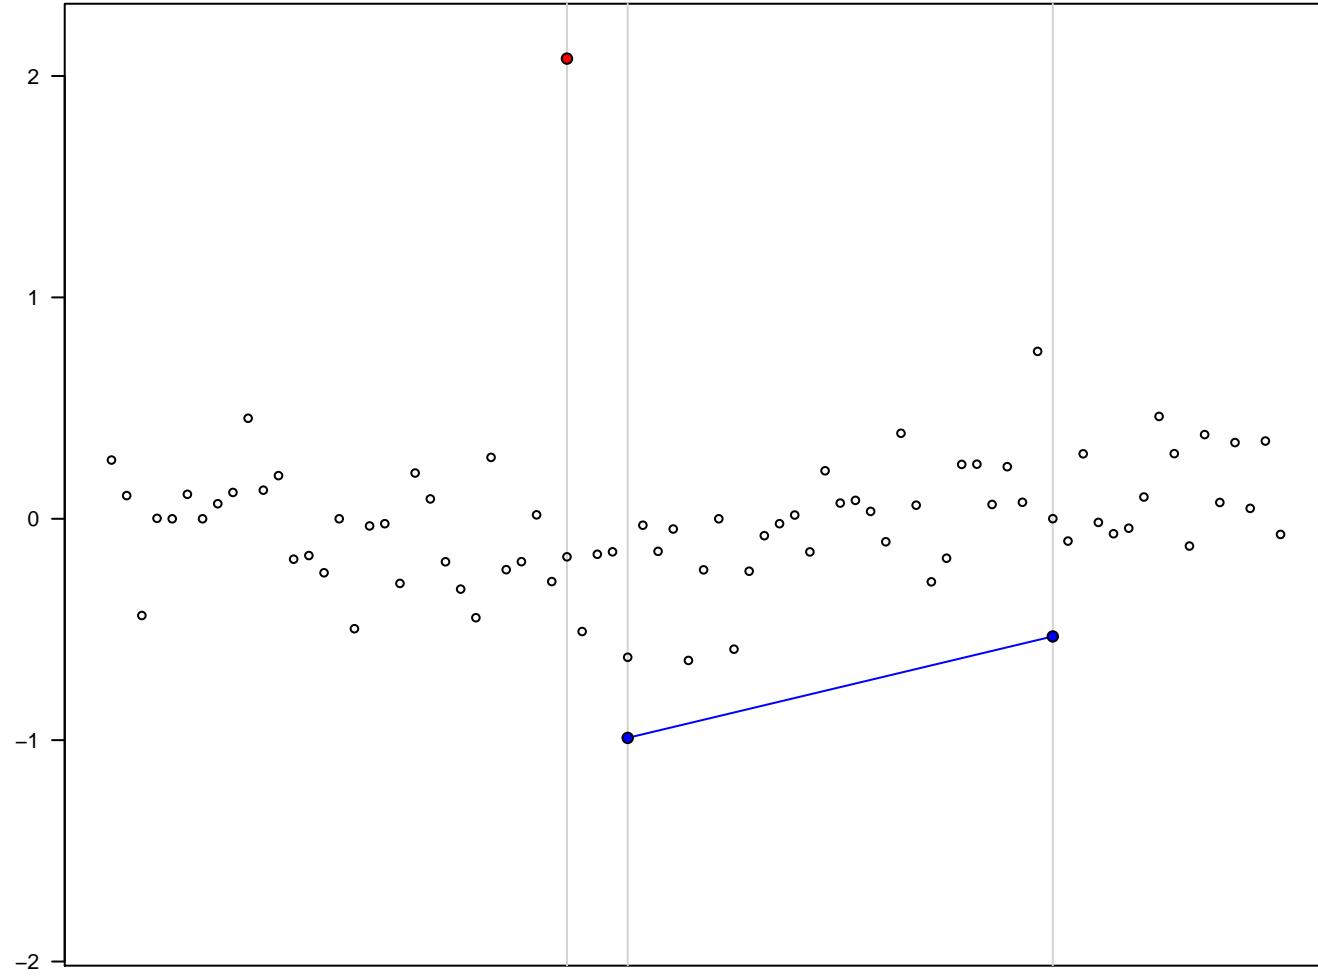

MRC Harwell

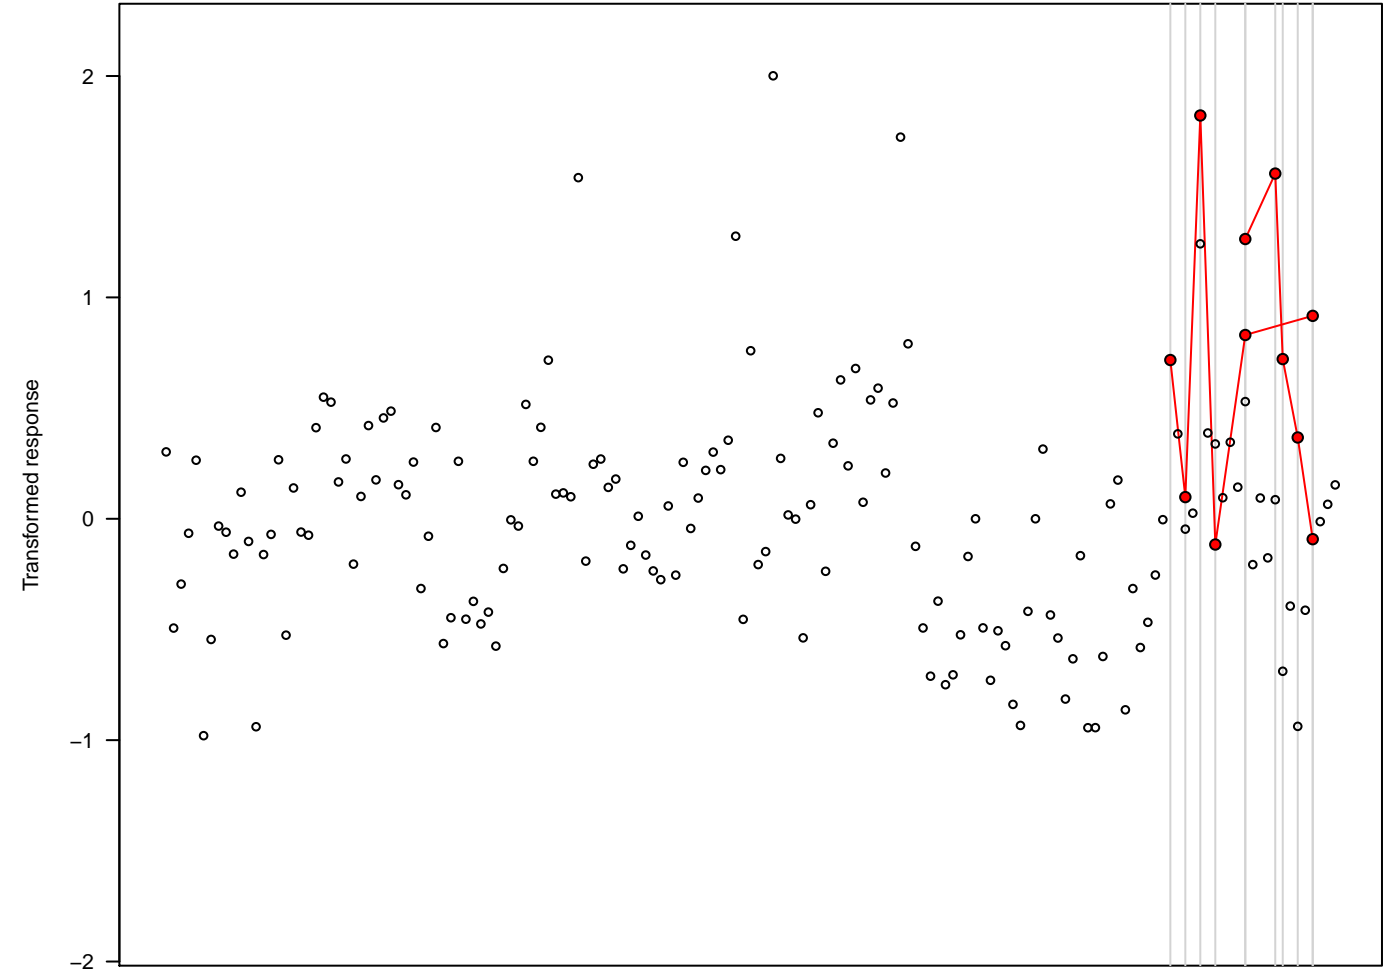

WTSI

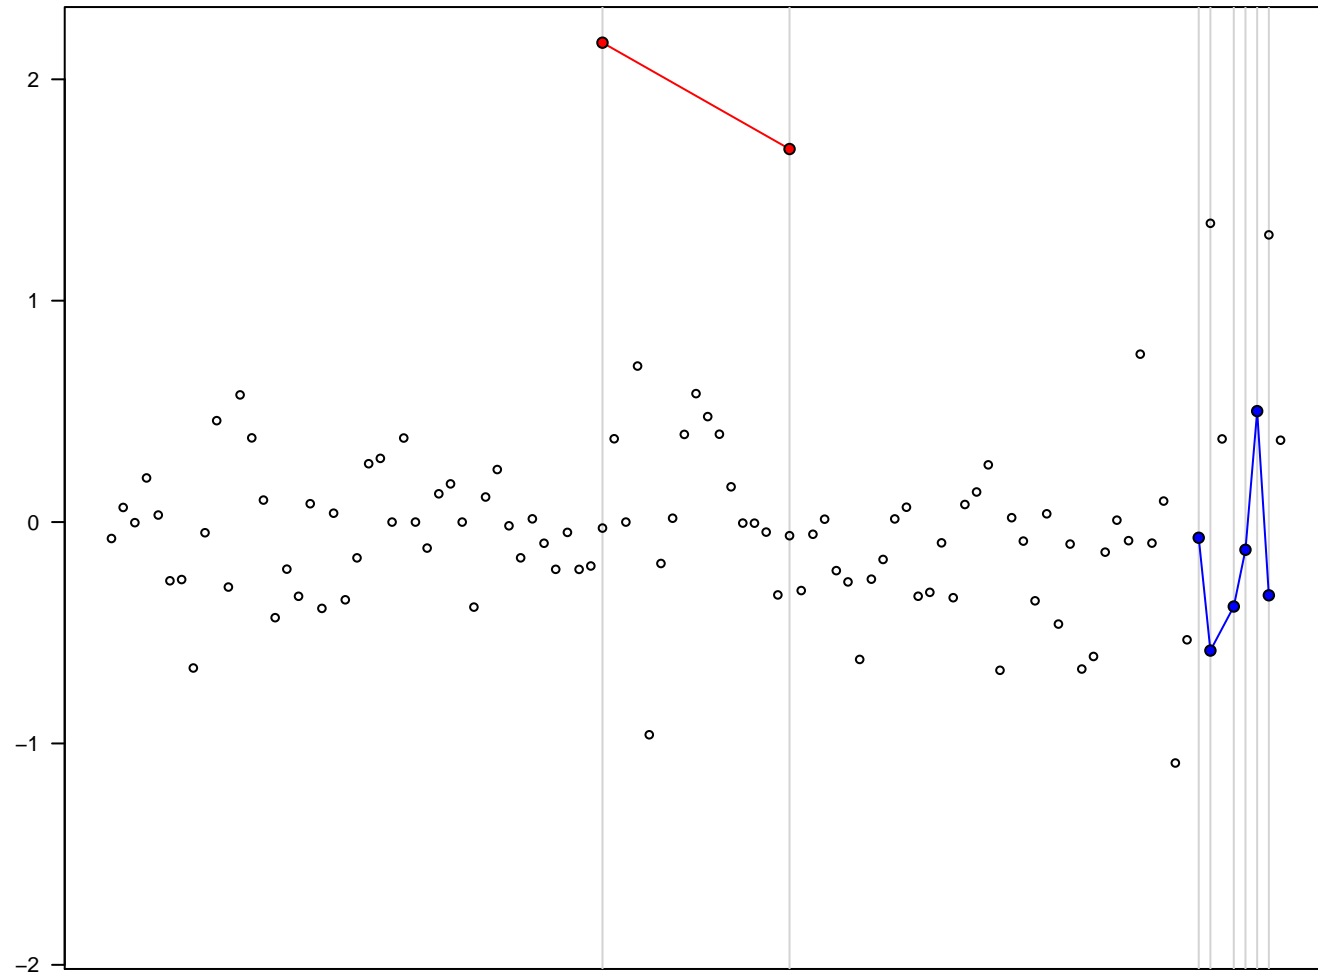

ICS

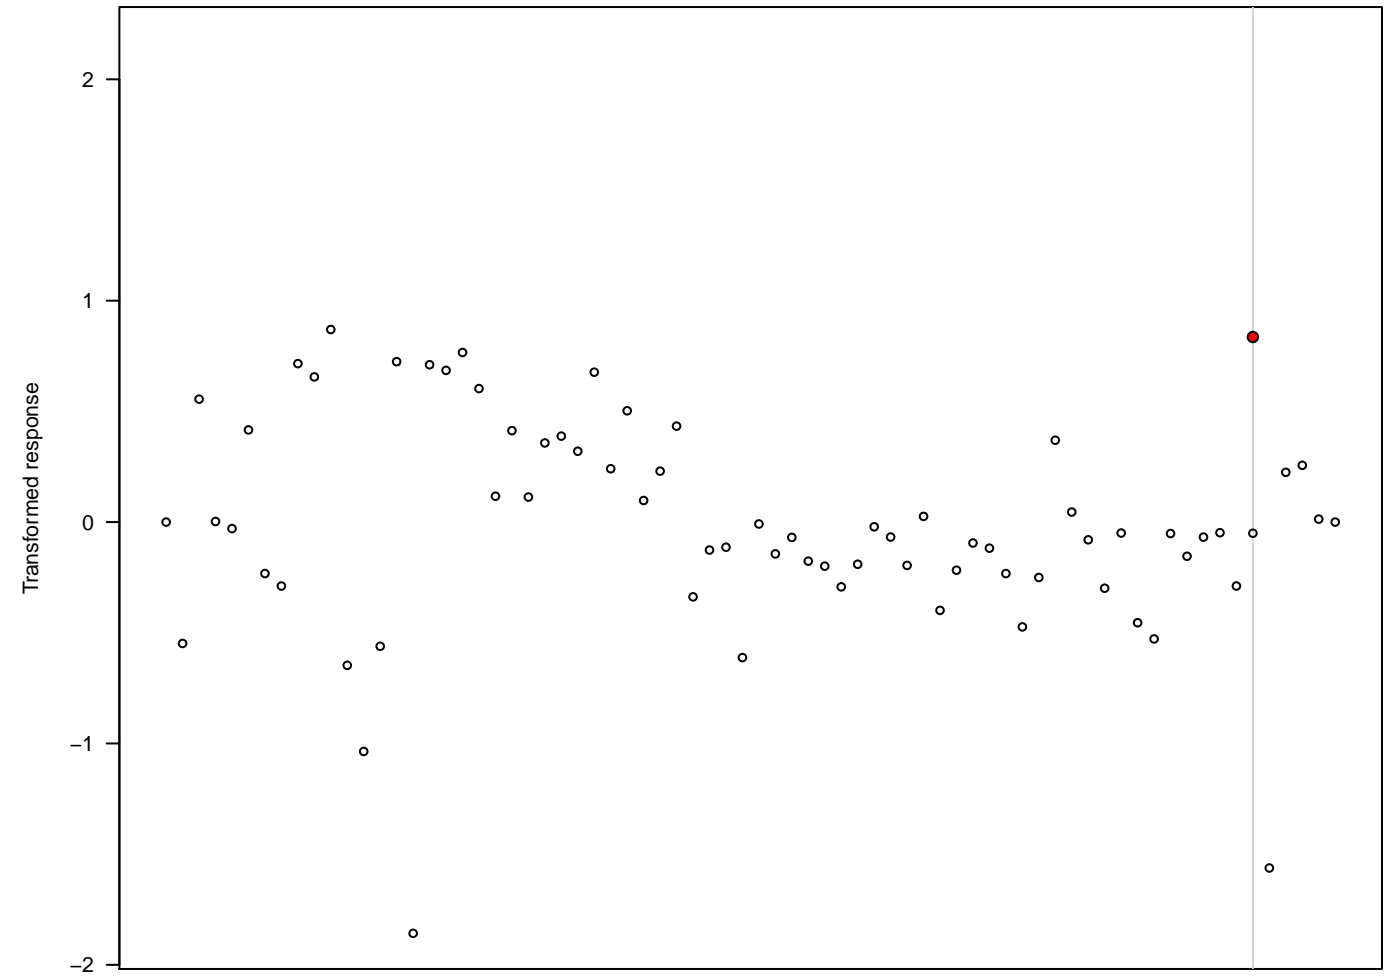

Mean cell haemoglobin concentration  
(Haematology)

HMGU

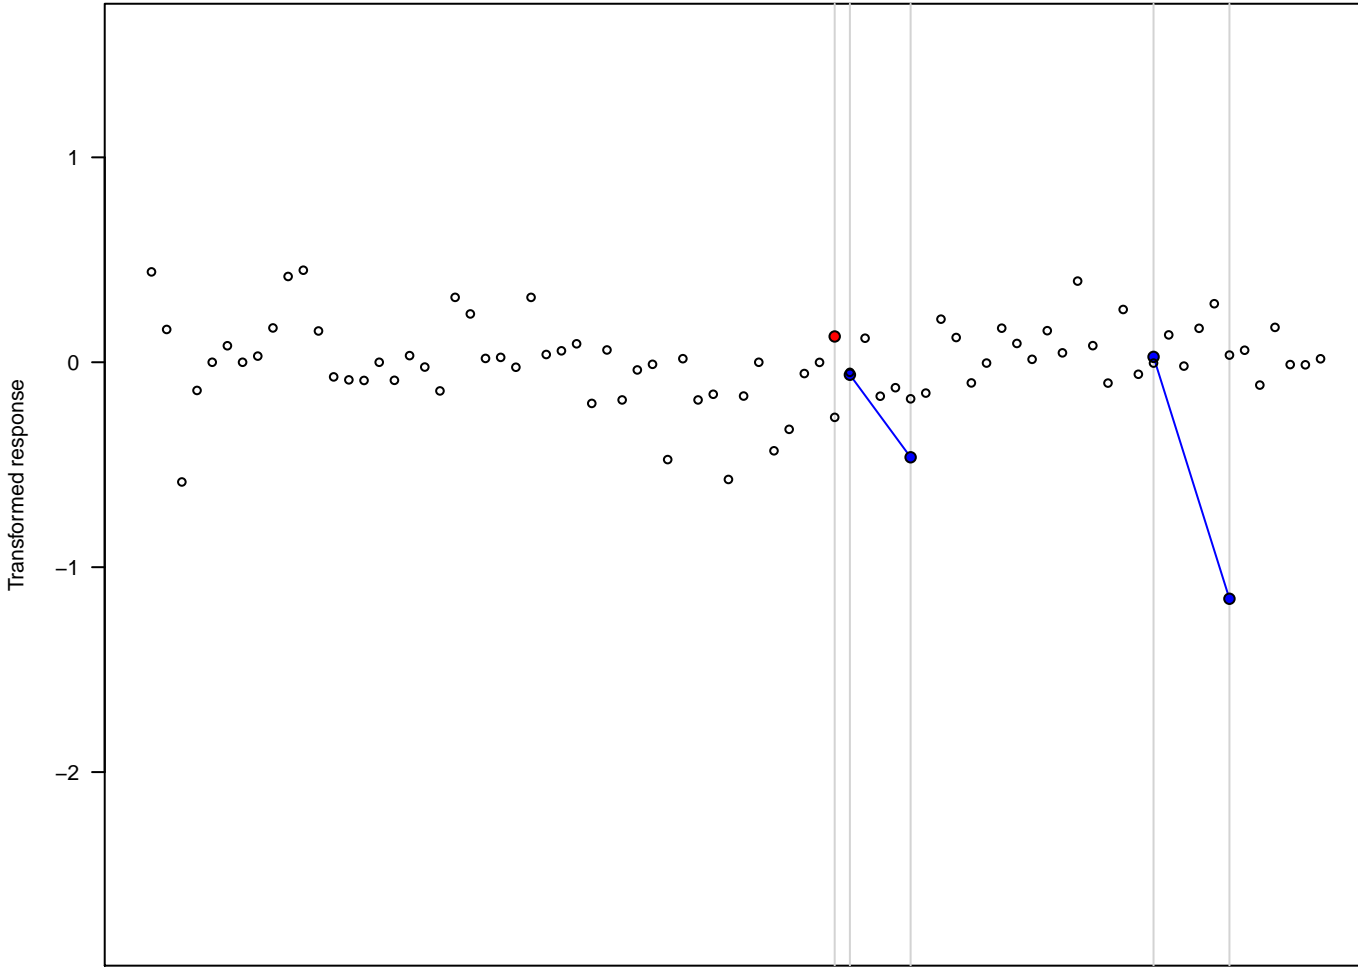

MRC Harwell

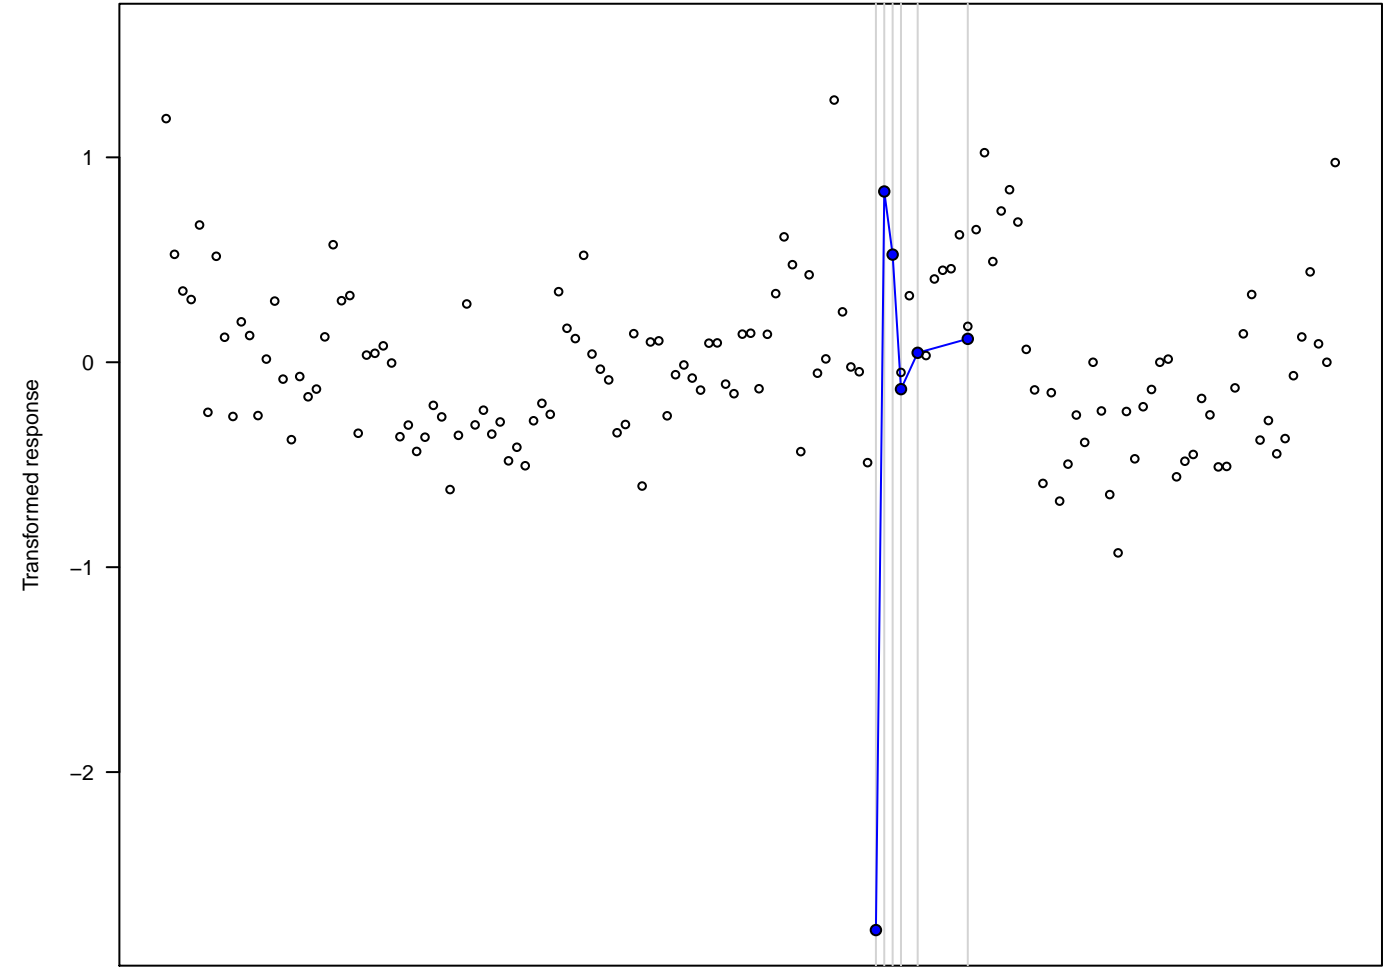

WTSI

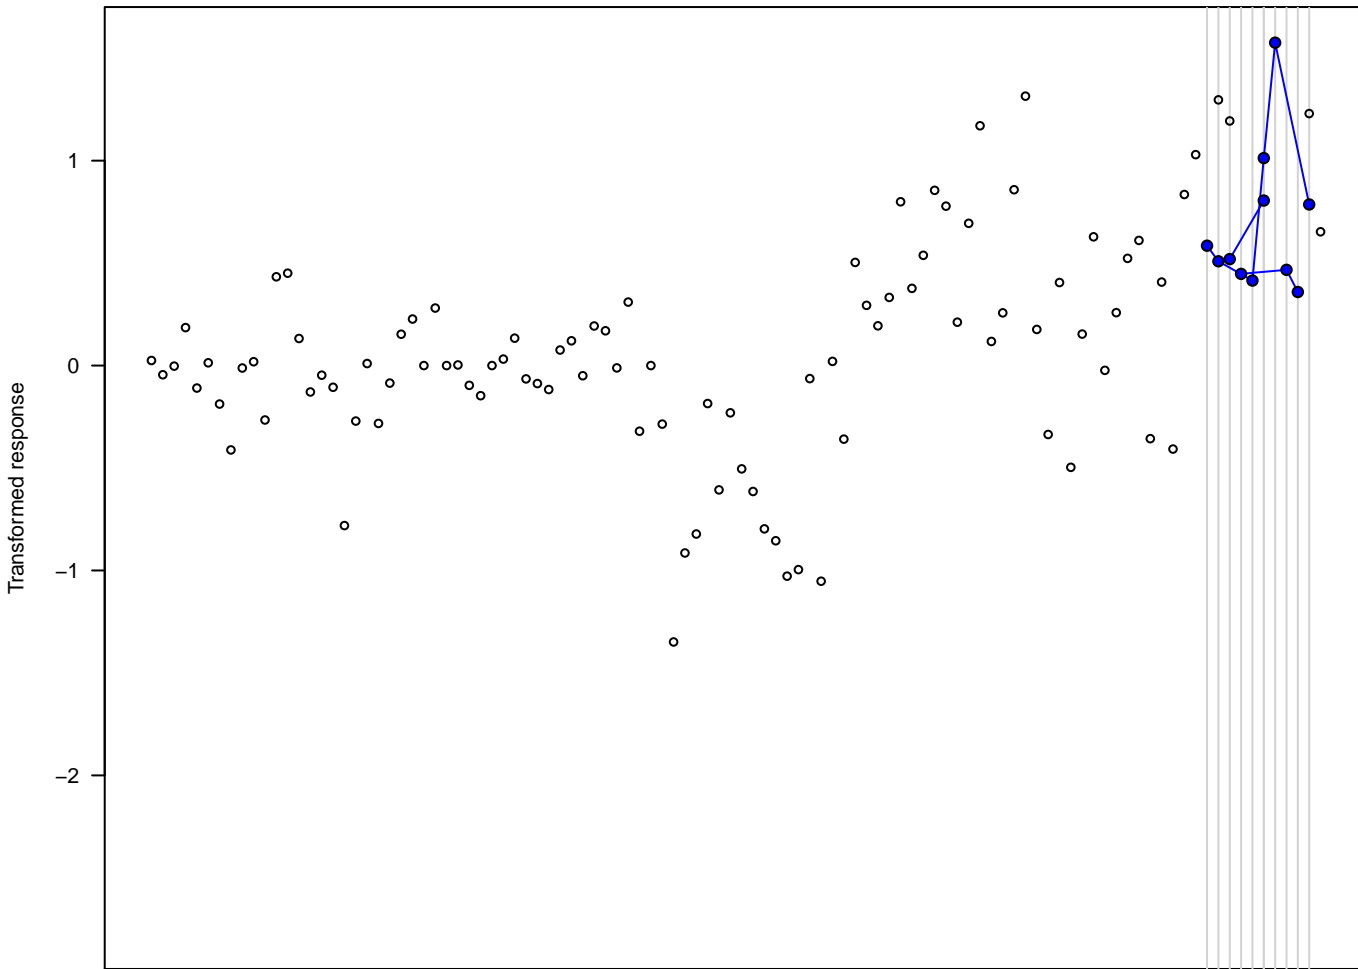

ICS

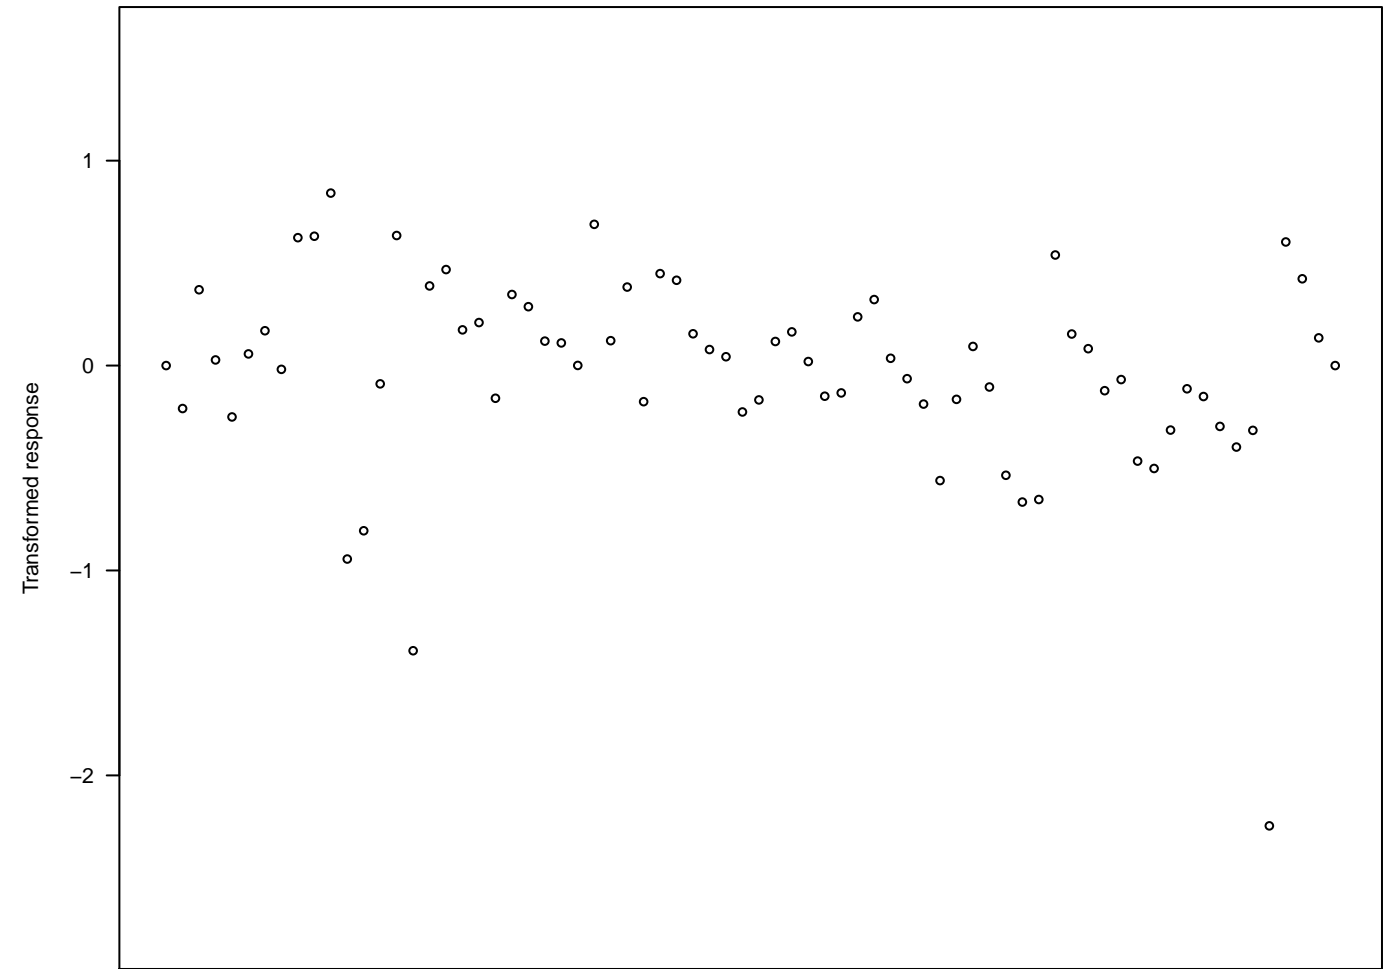

Platelets count  
(Haematology)

HMGU

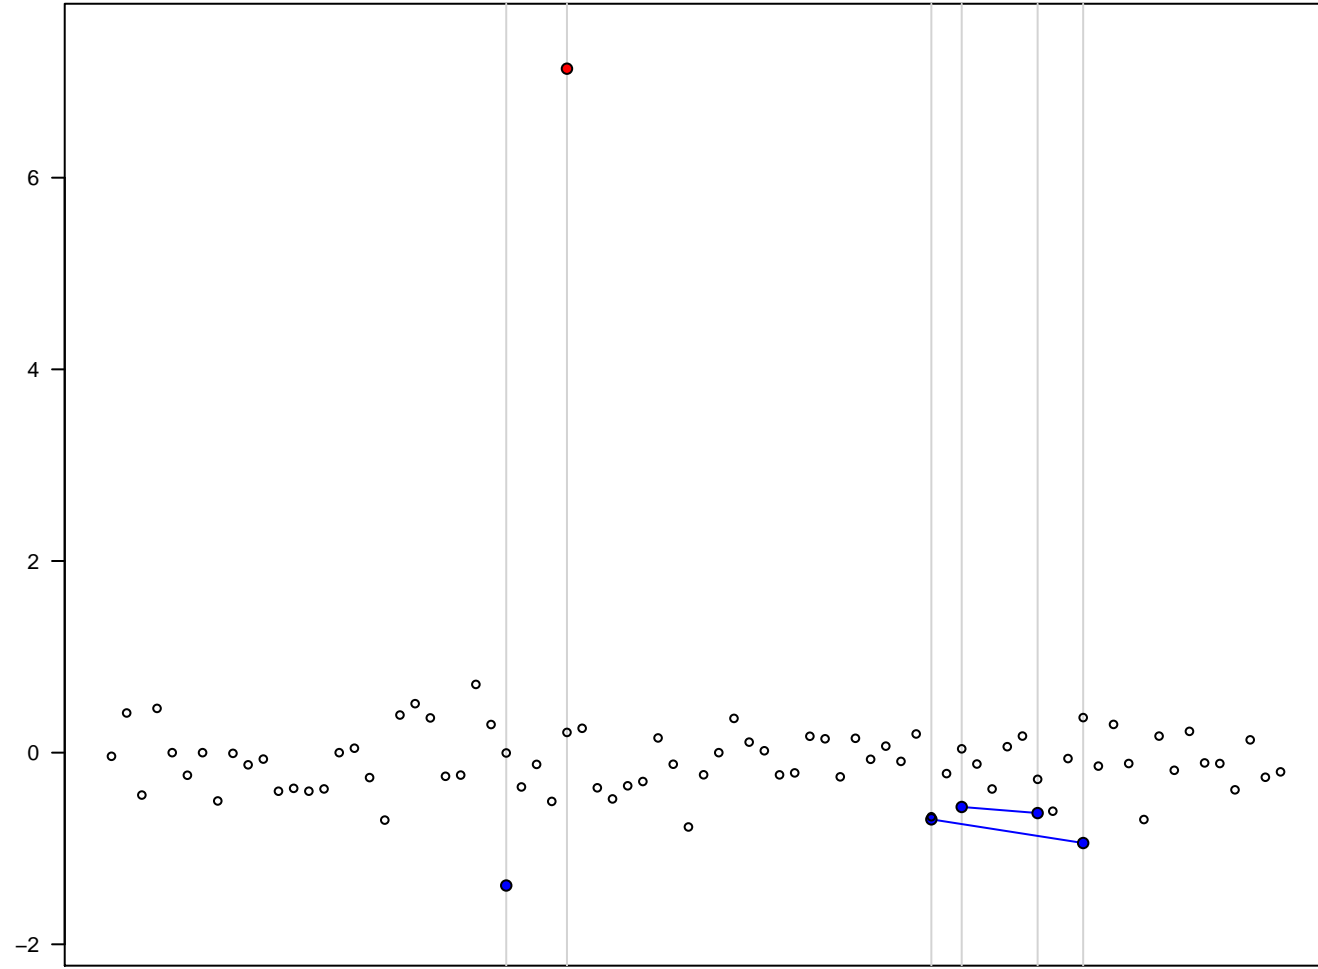

MRC Harwell

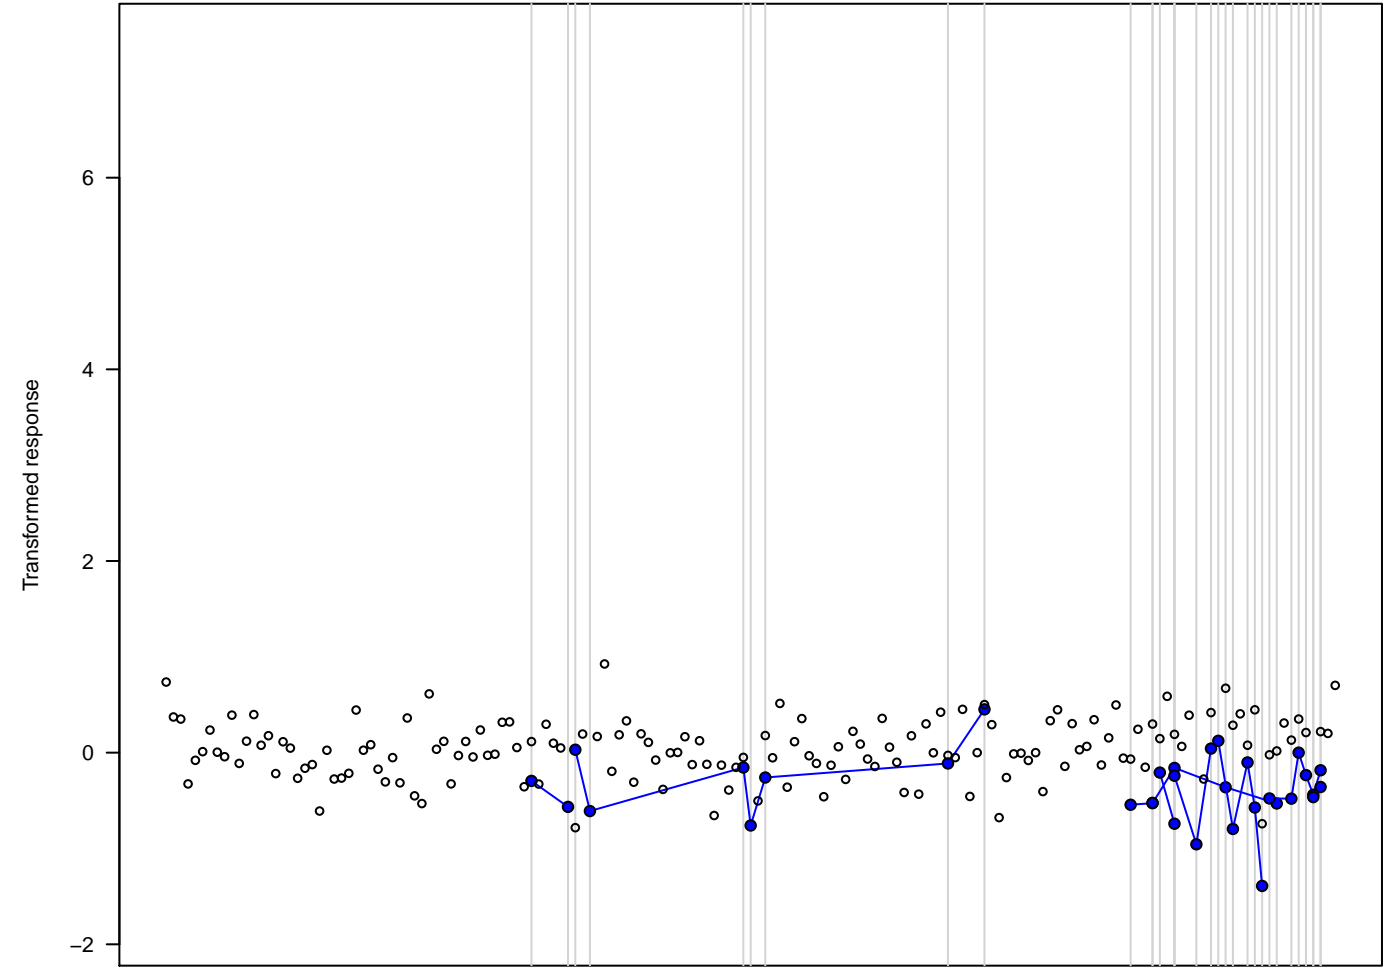

WTSI

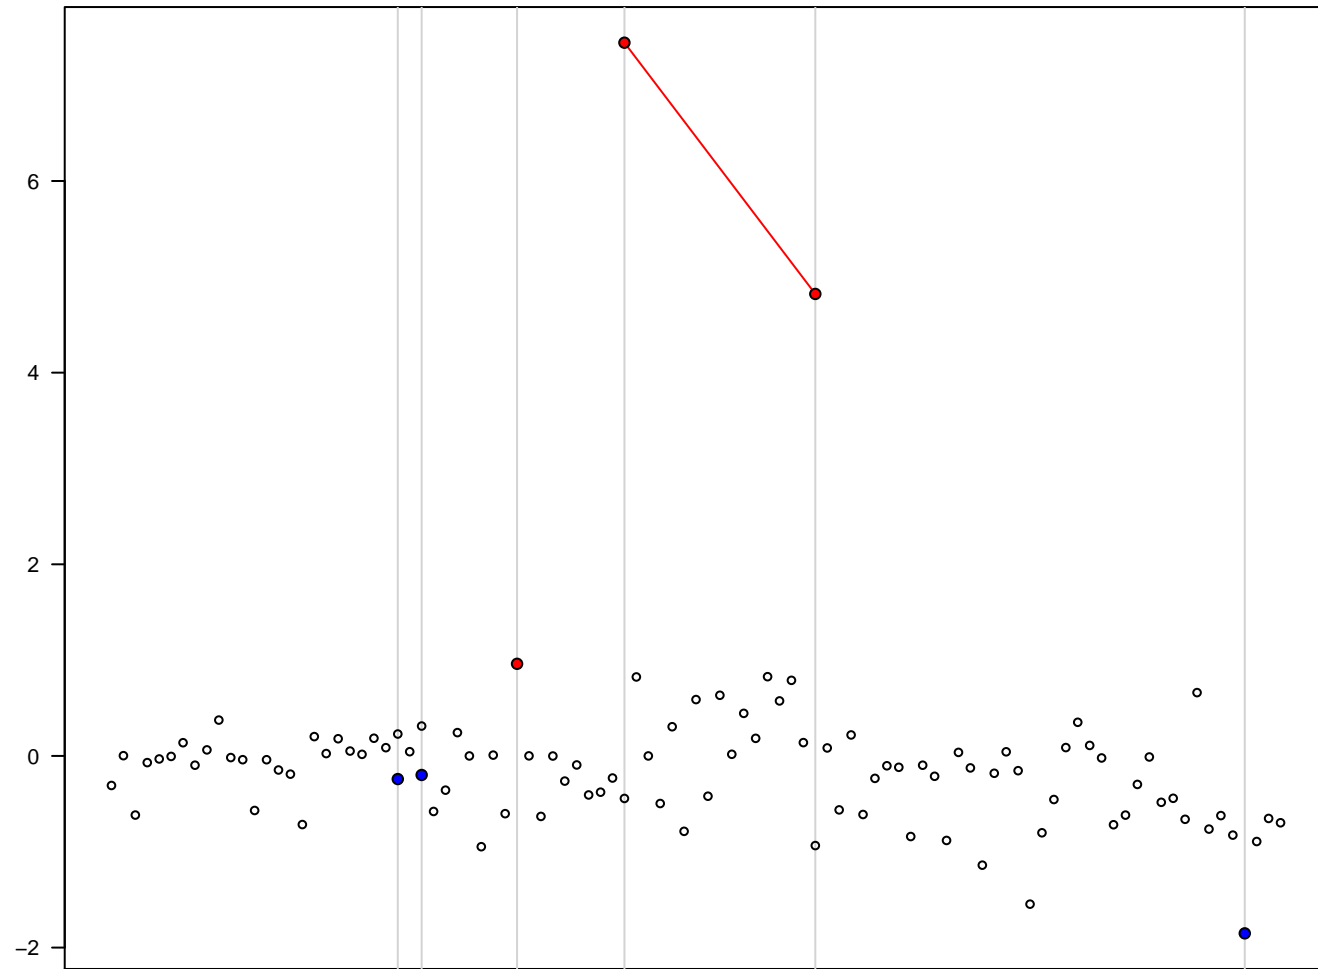

ICS

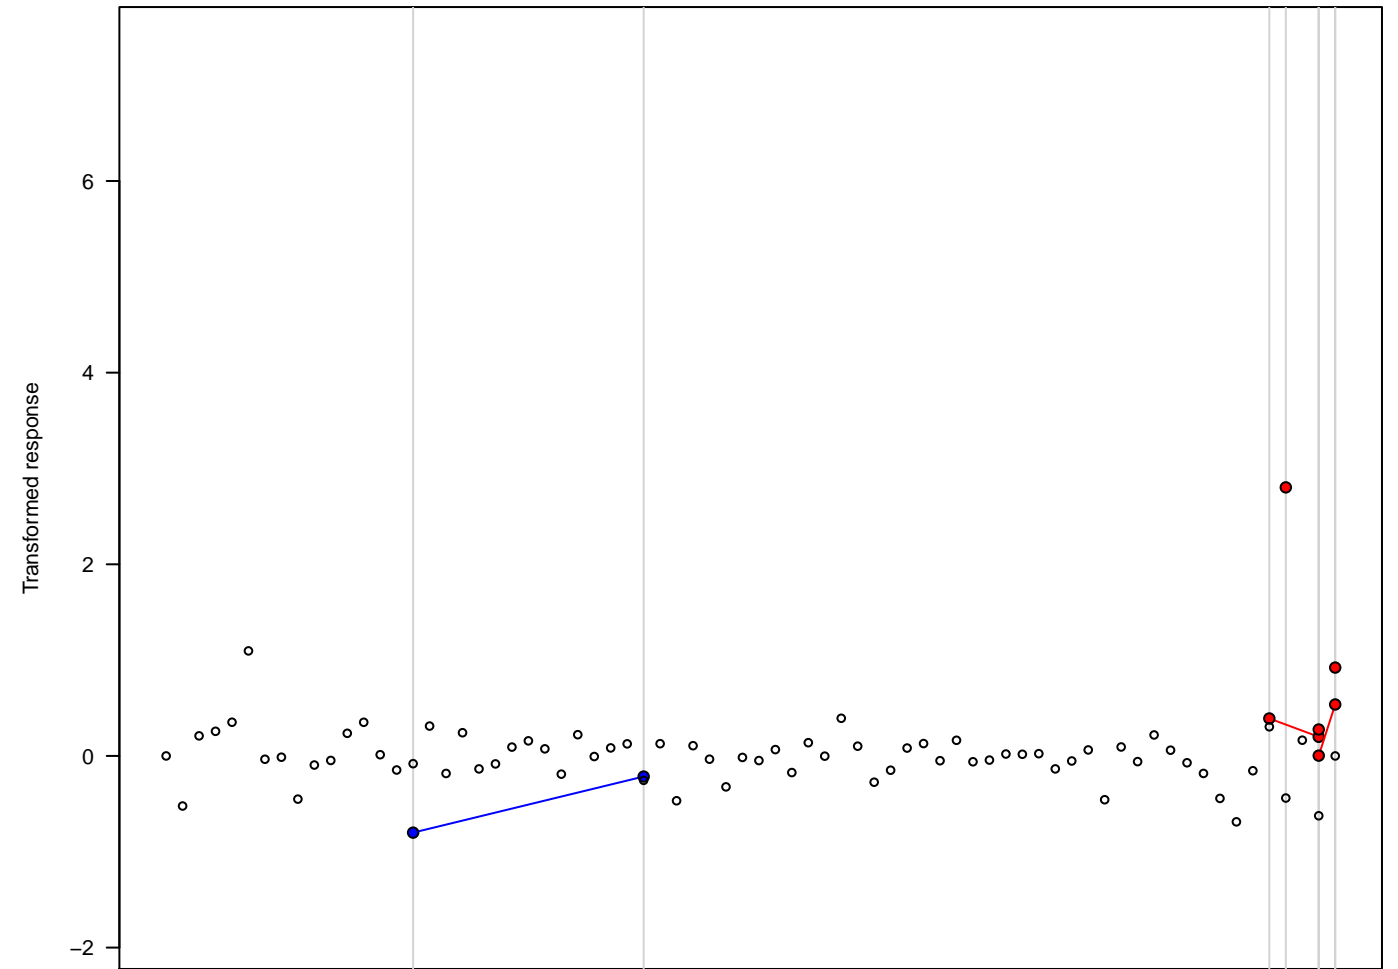

T cell CD4+ percentage  
(FACs Analysis)

HMGU

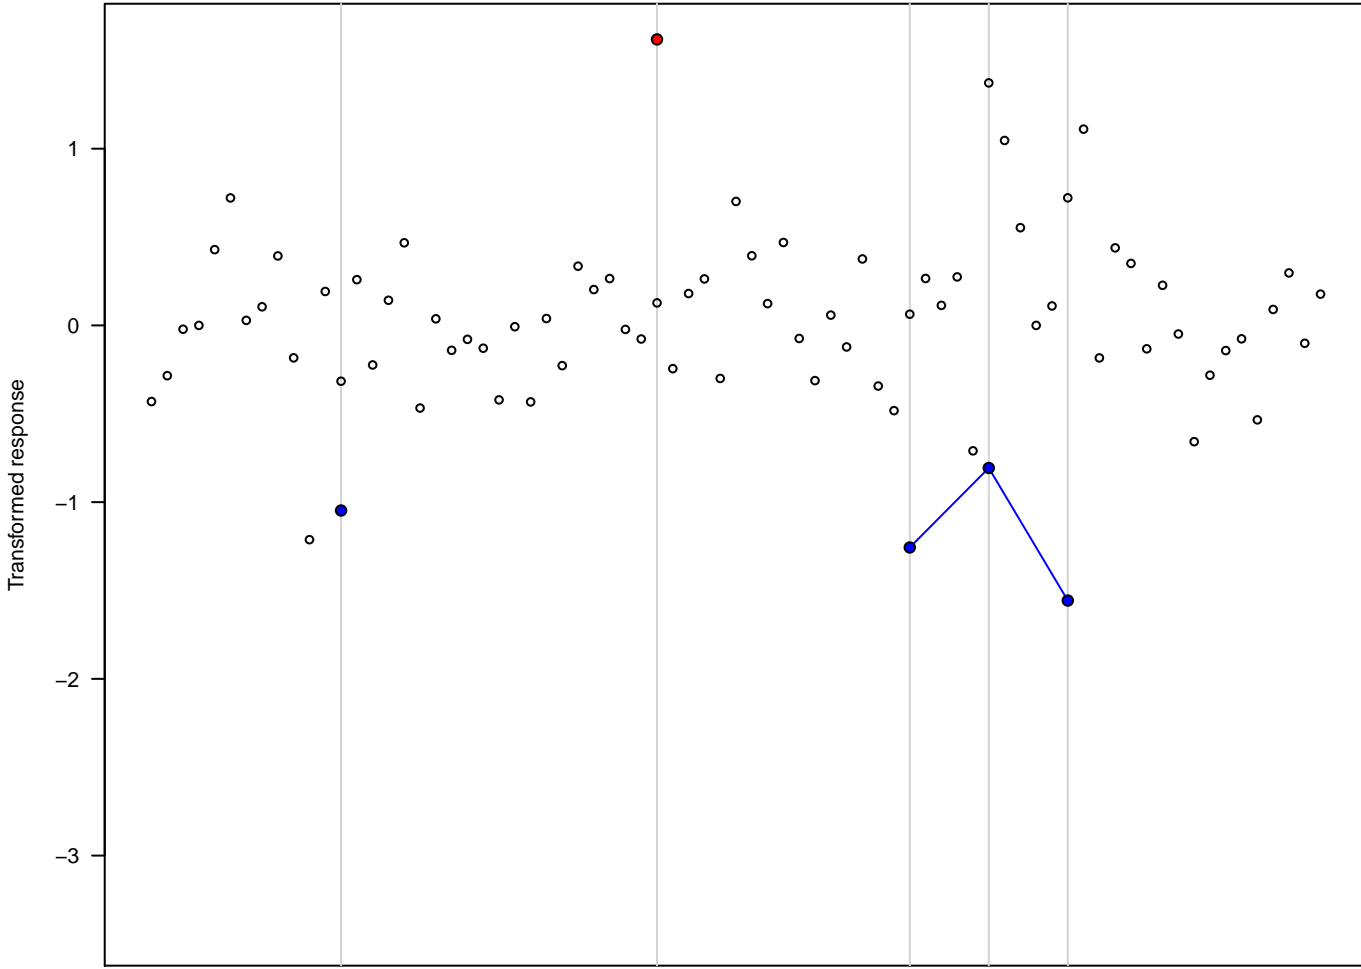

MRC Harwell

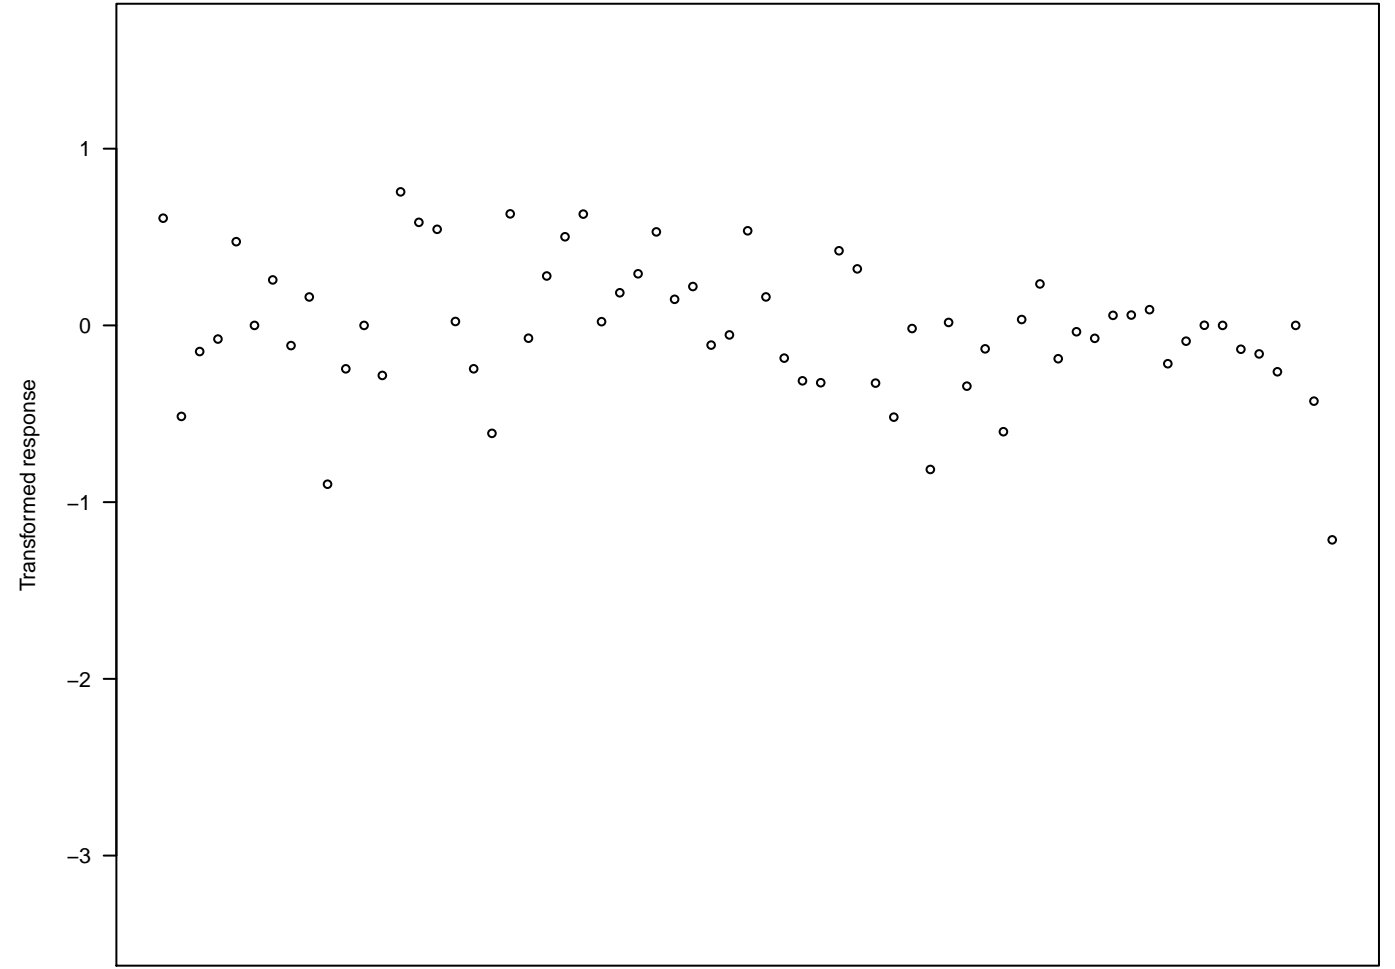

WTSI



ICS

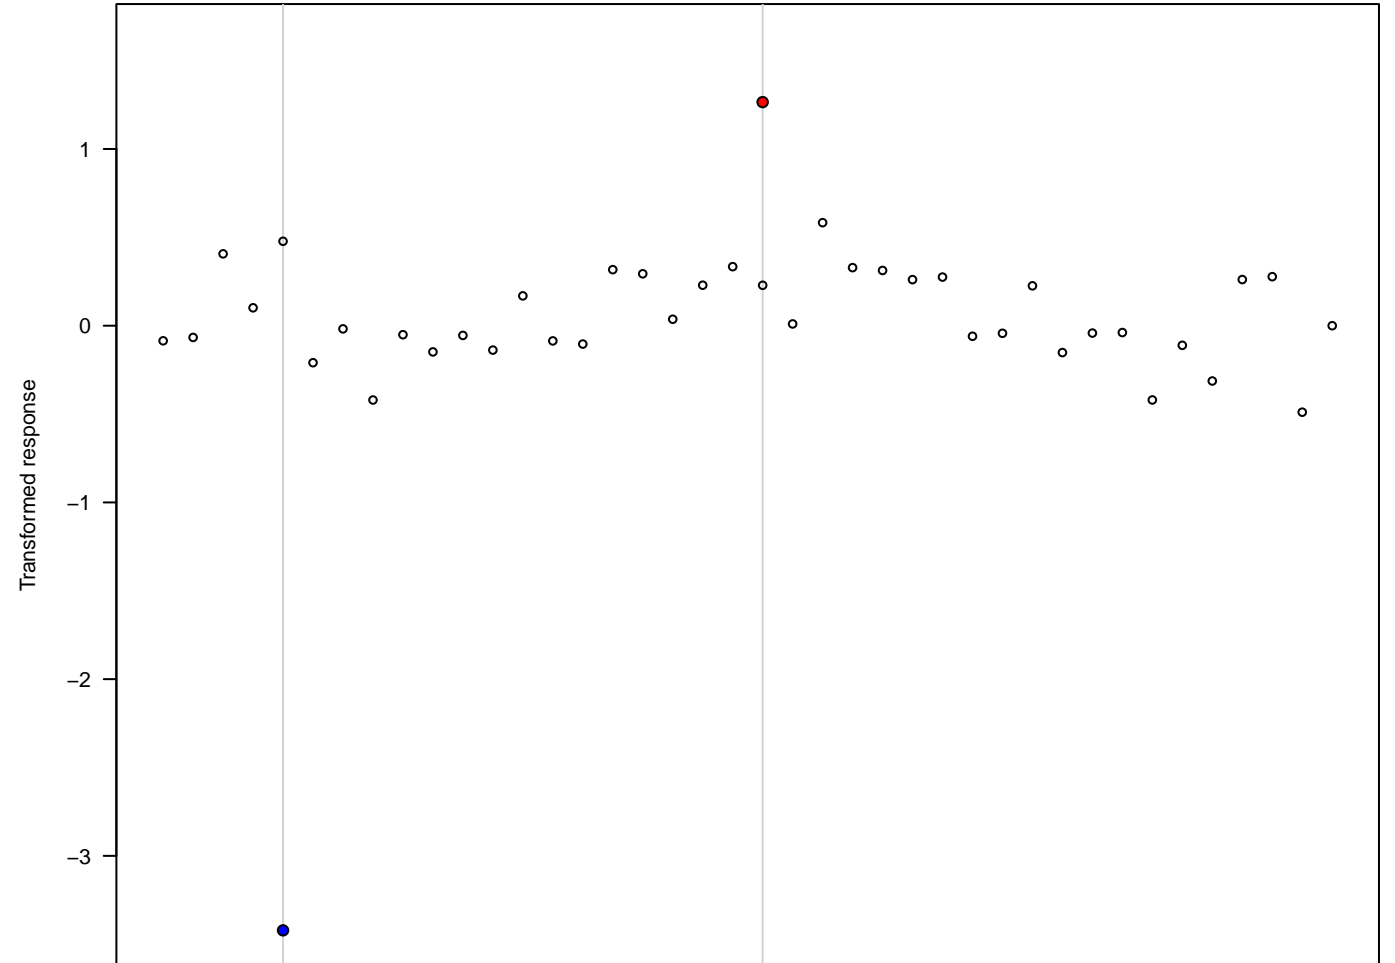



T cell CD8+ percentage  
(FACs Analysis)

HMGU

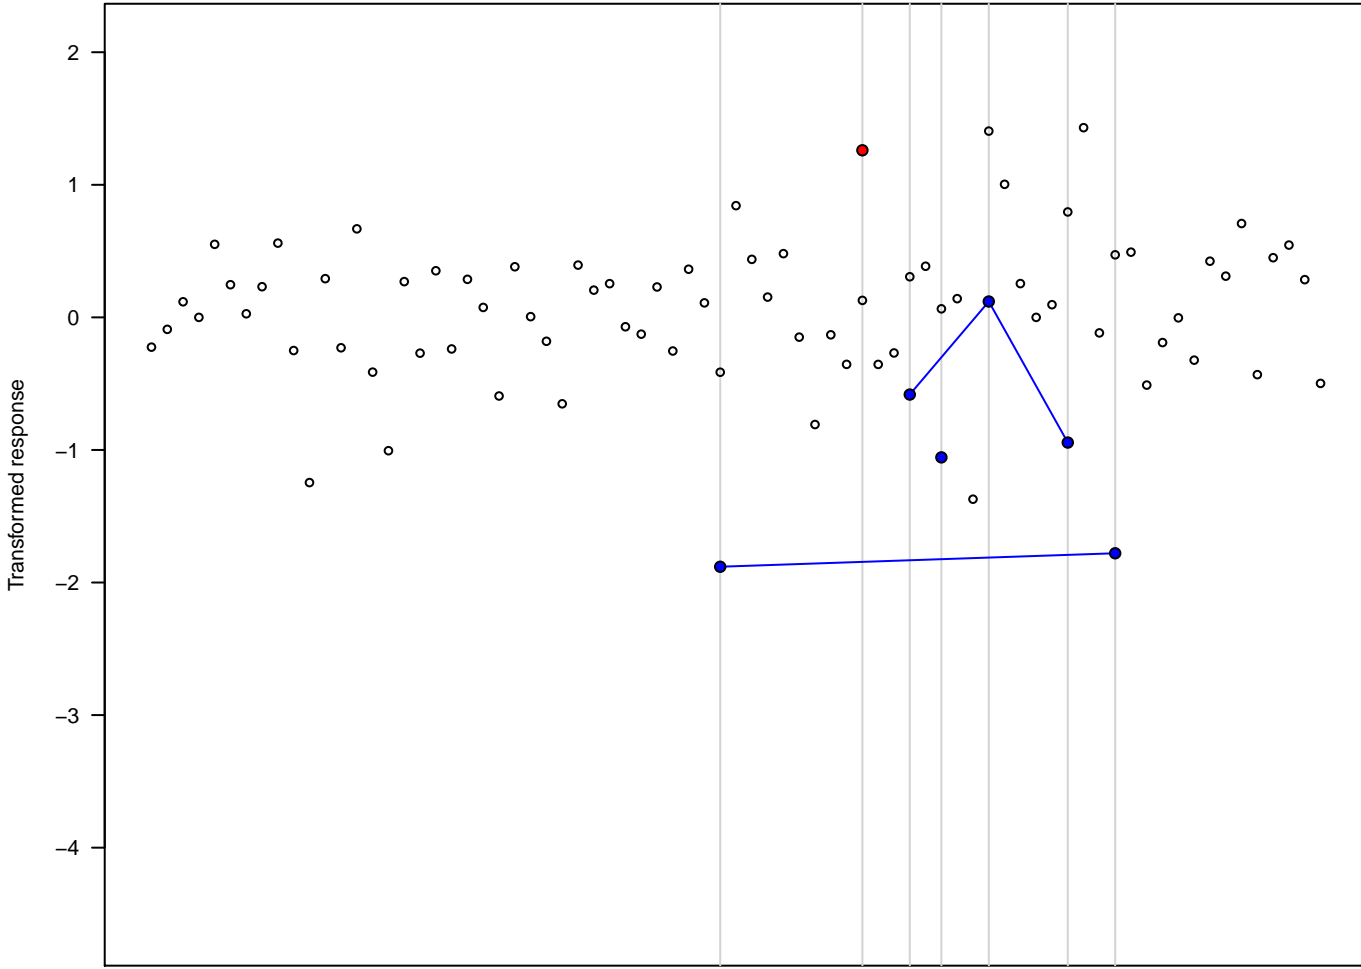

MRC Harwell

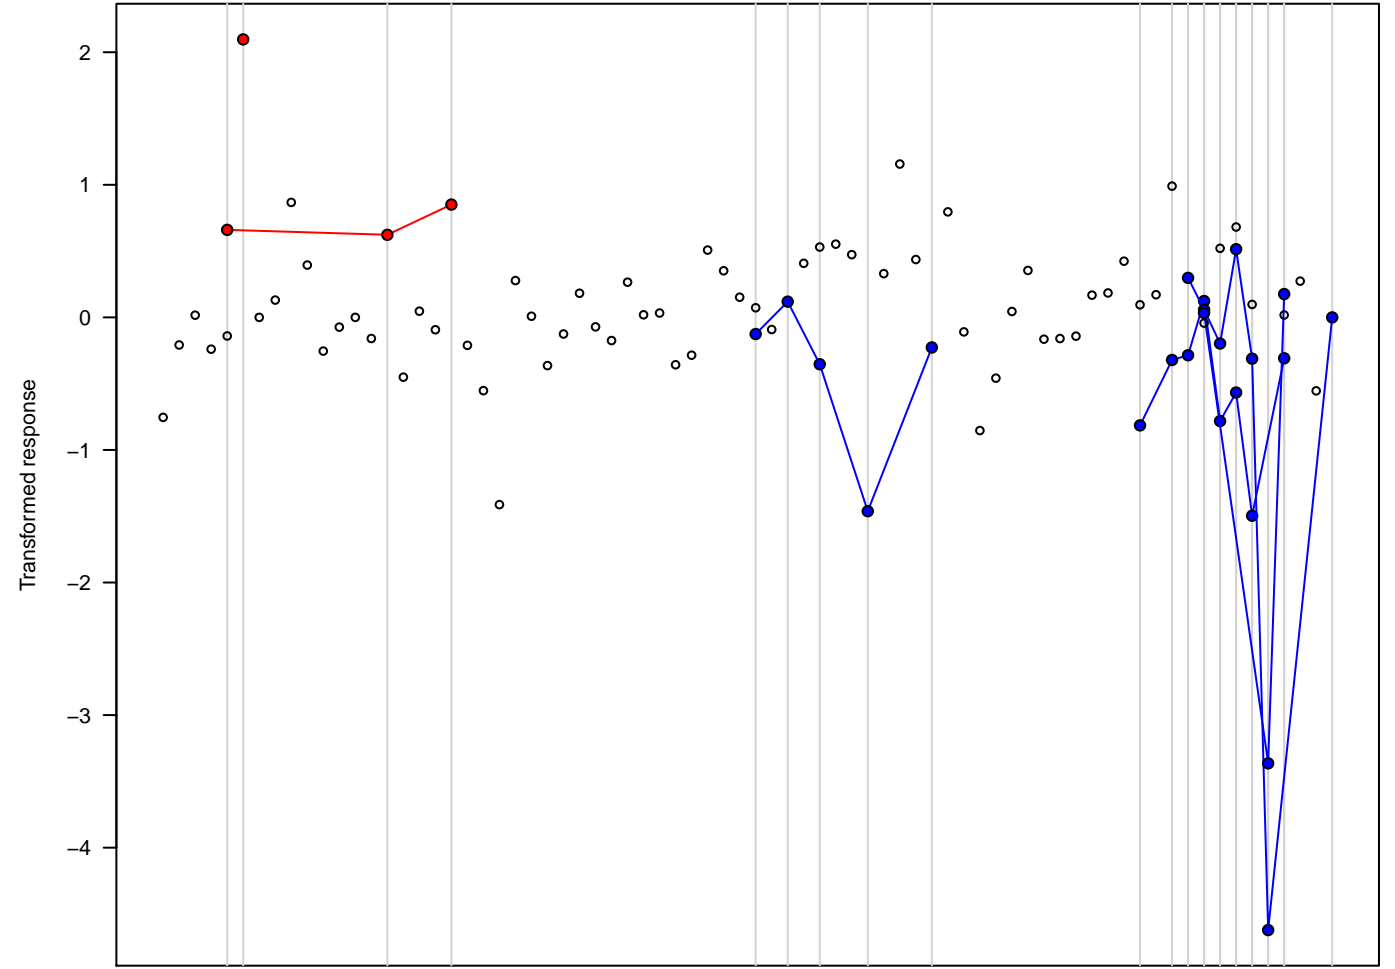

WTSI



ICS

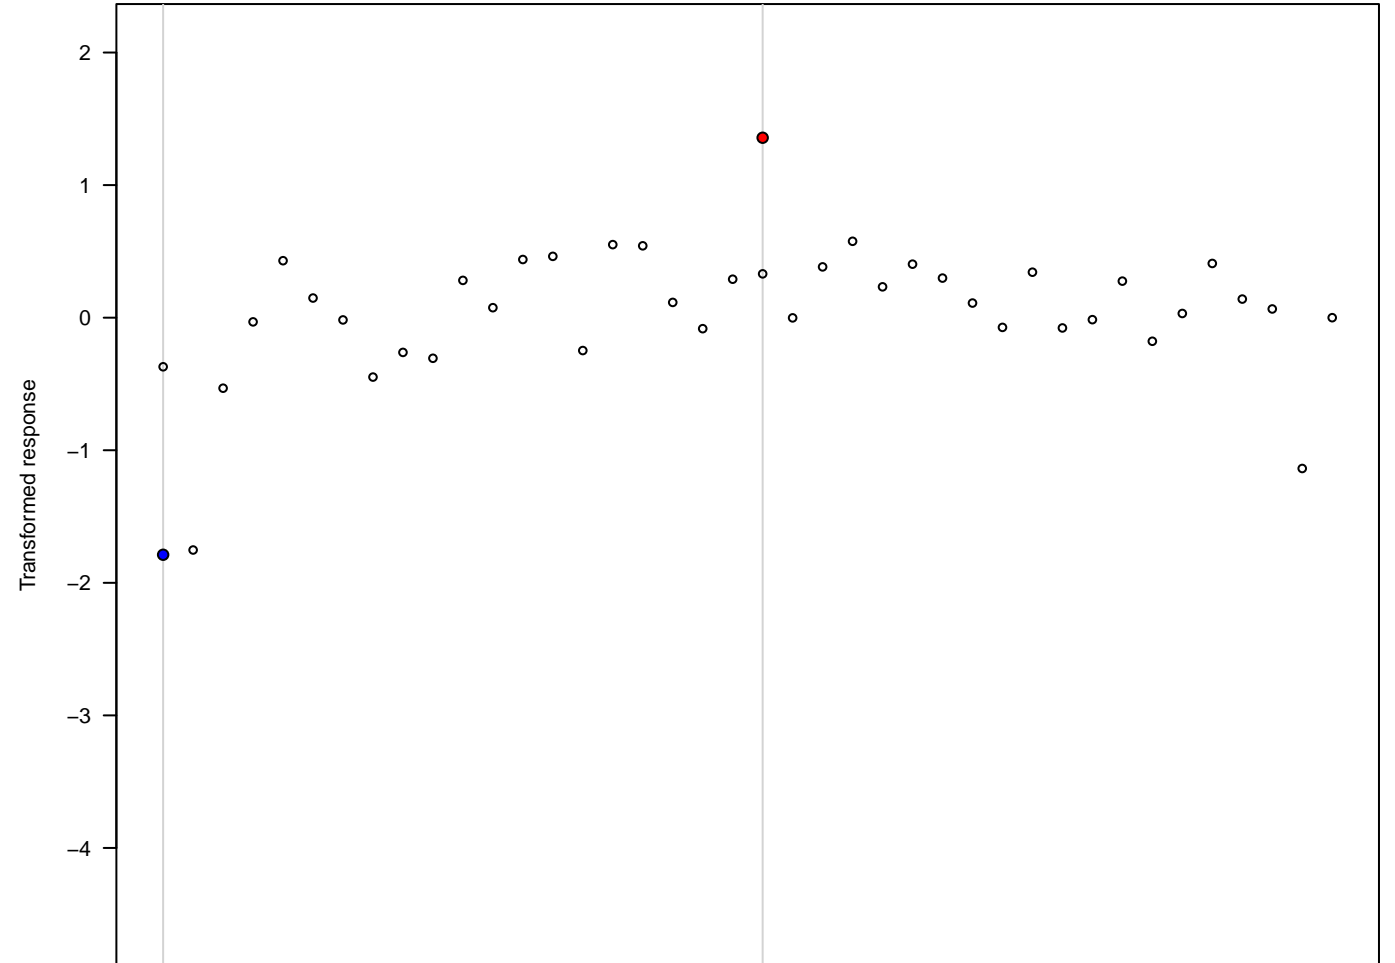

T cell CD3+ percentage  
(FACs Analysis)

HMGU

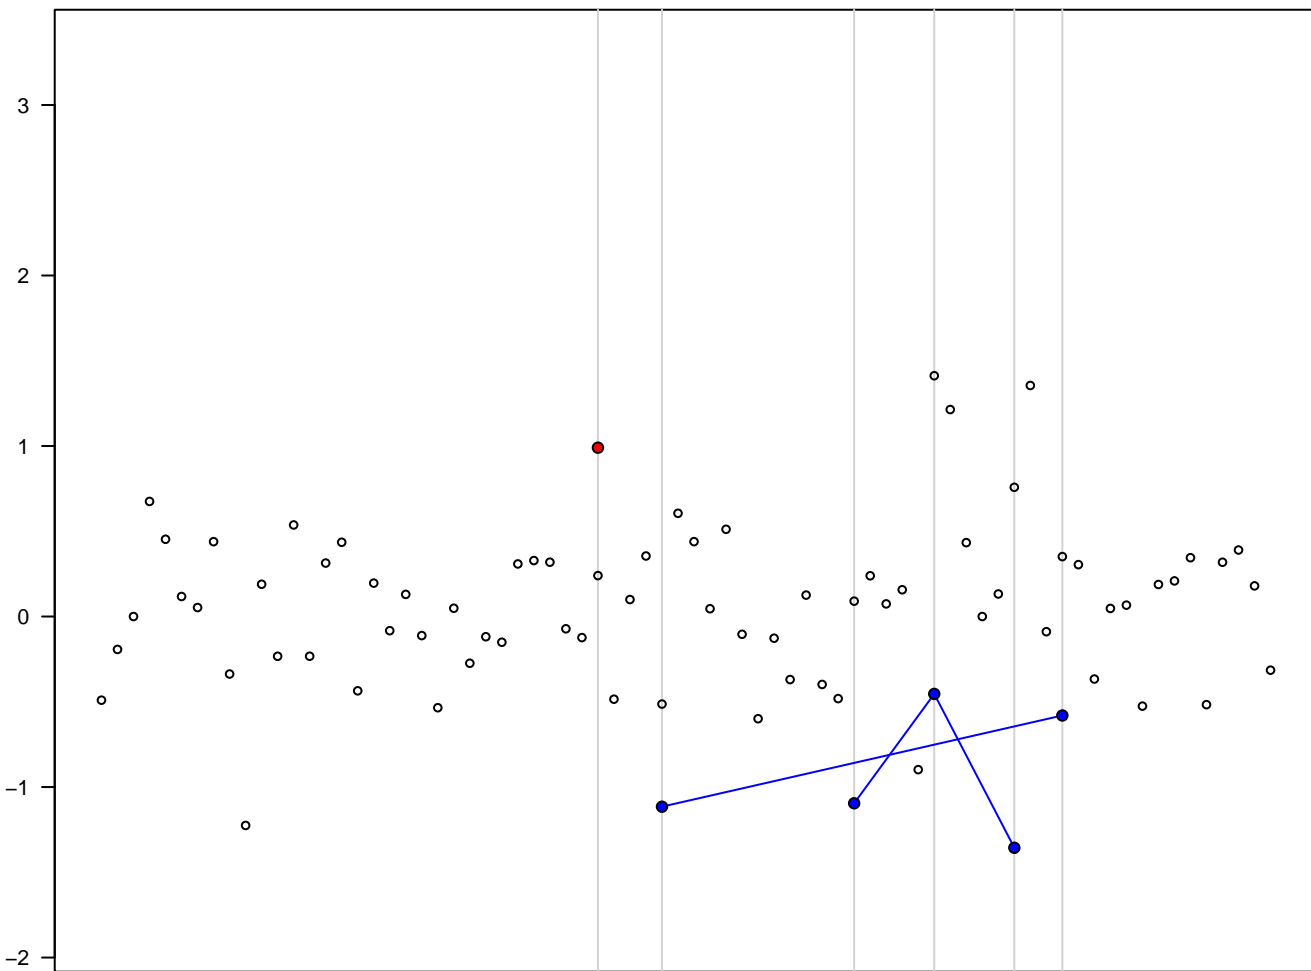

MRC Harwell

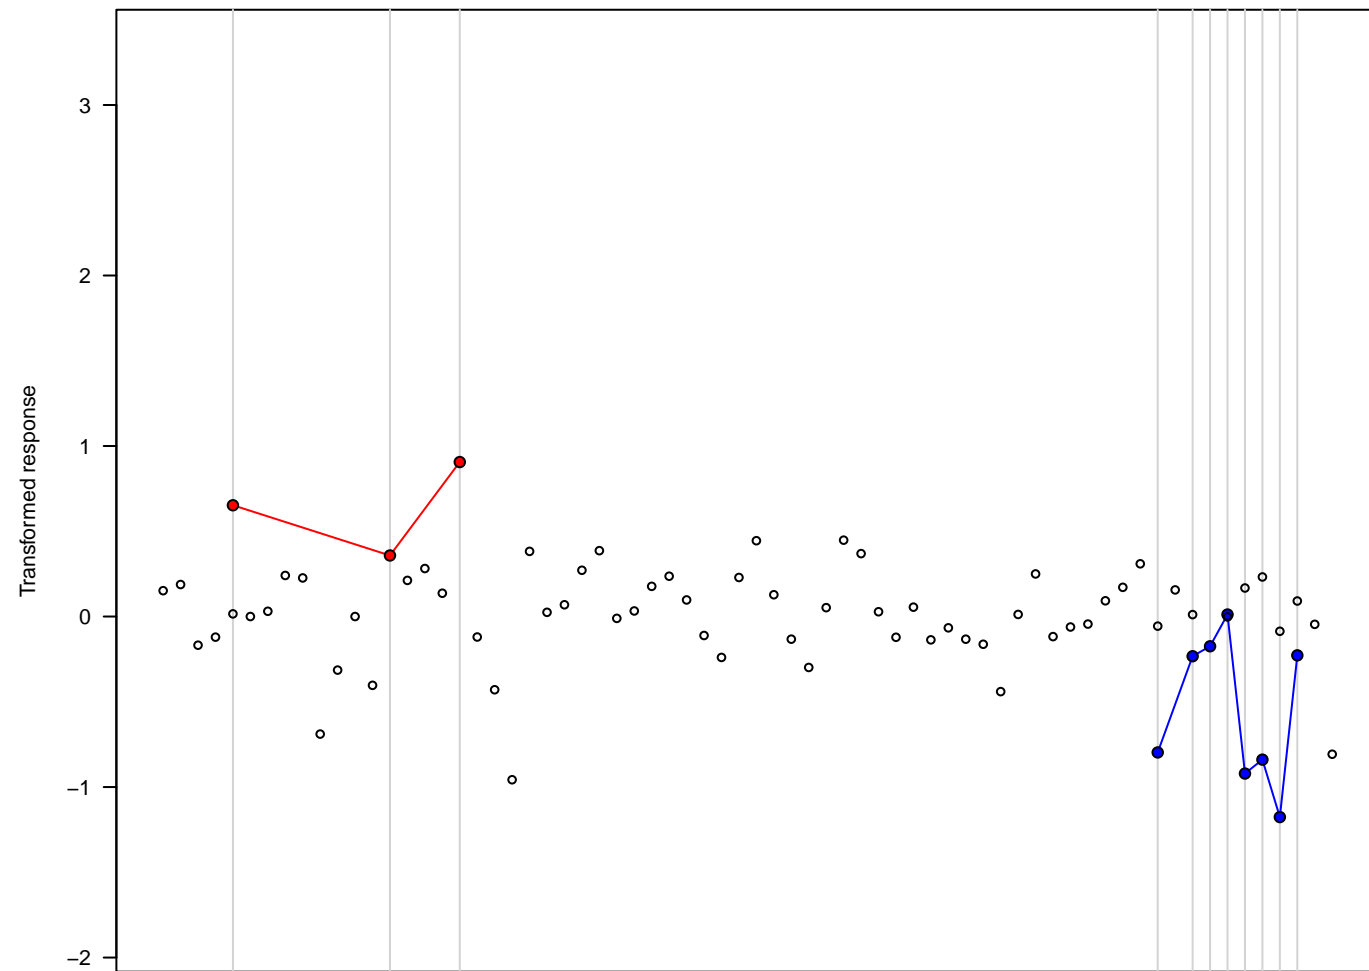

WTSI



ICS

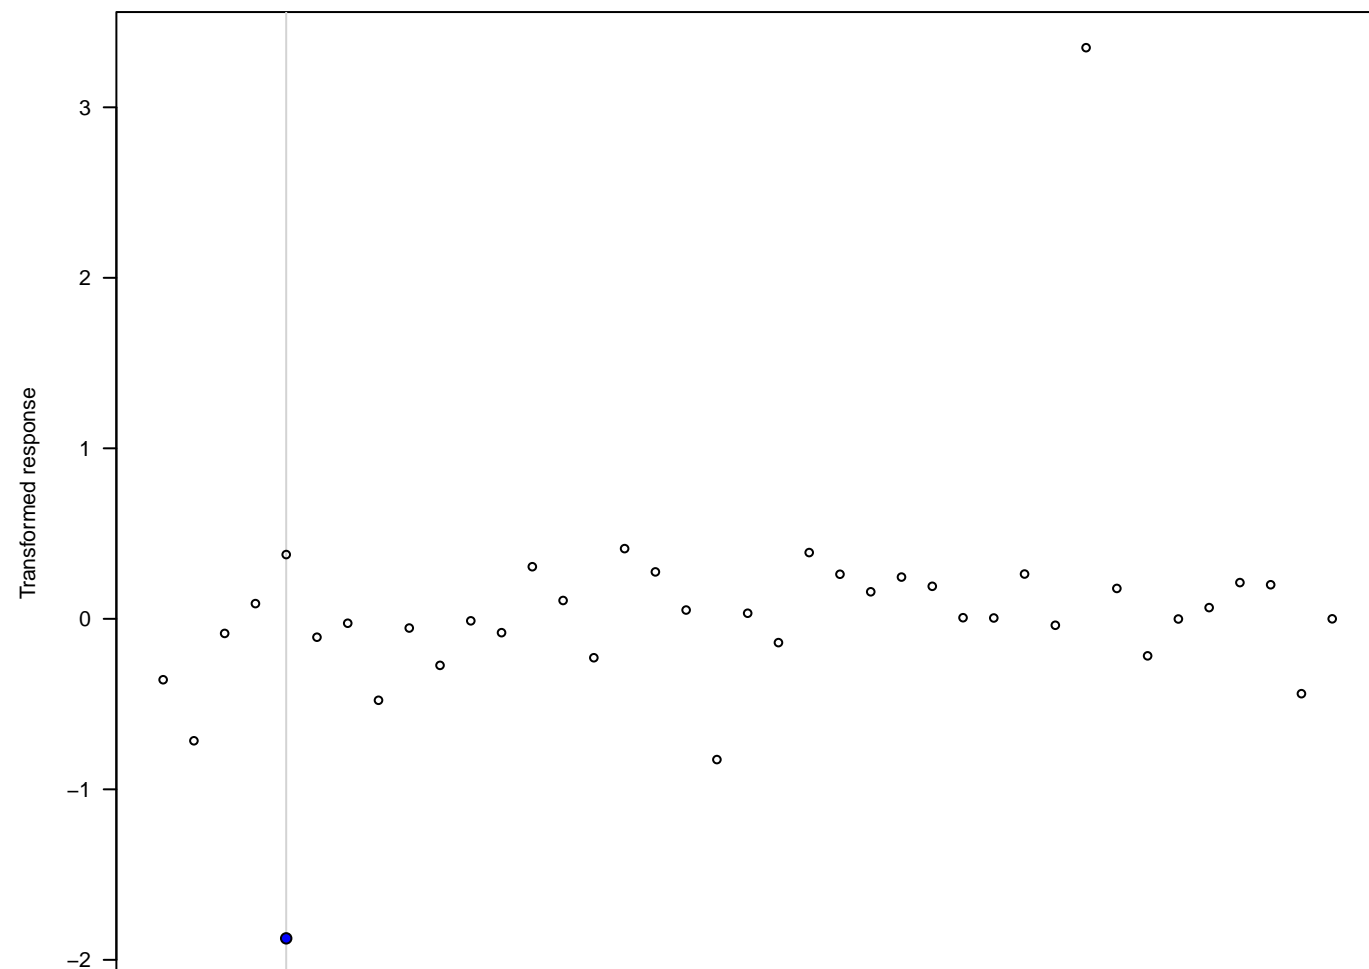

CD25+ percentage of CD4+ T cells  
(FACs Analysis)

HMGU

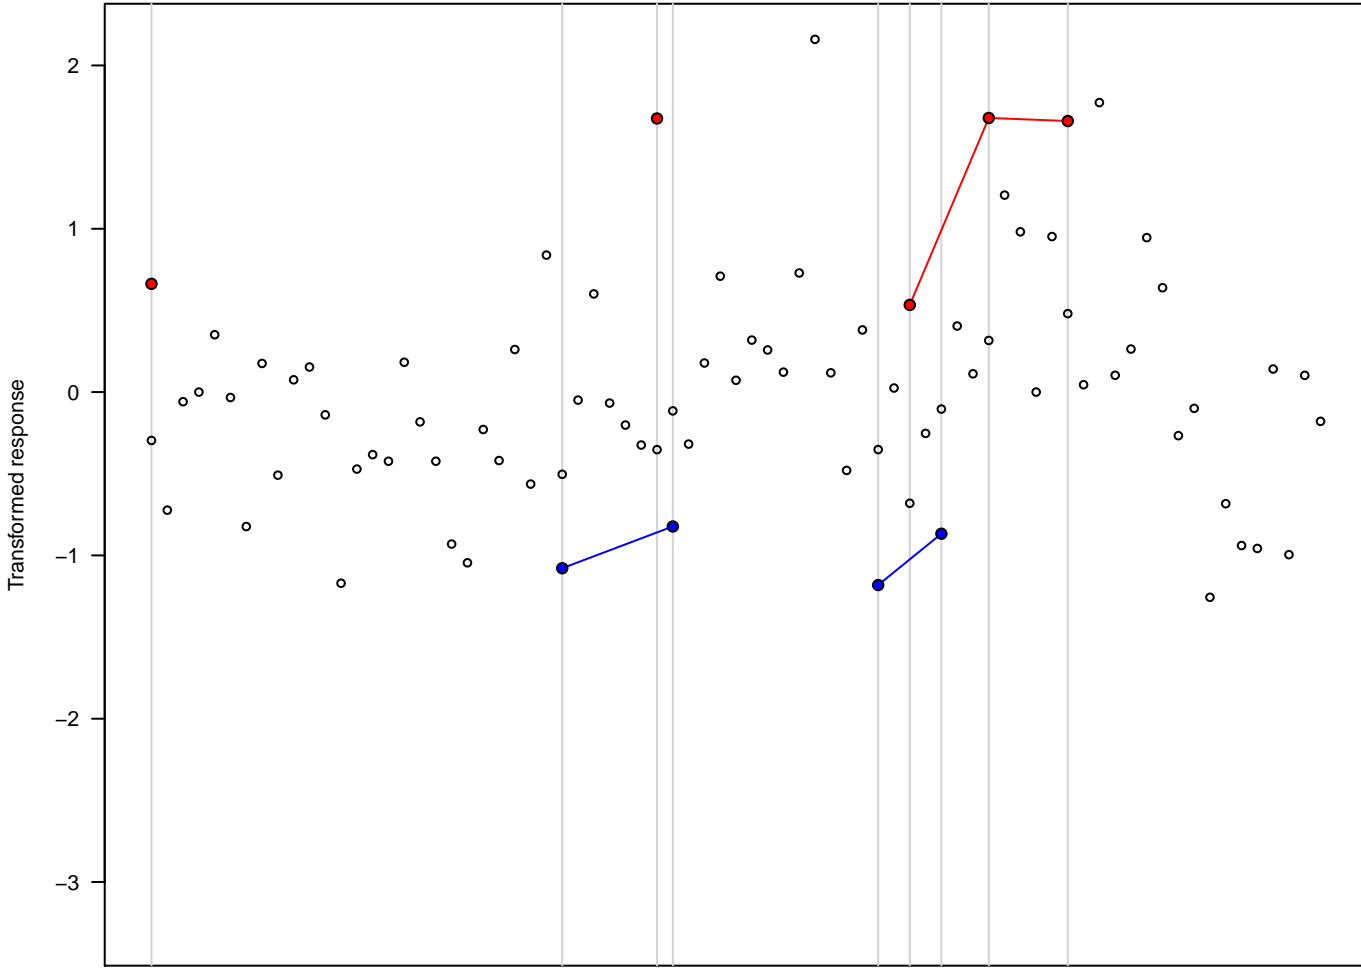

MRC Harwell

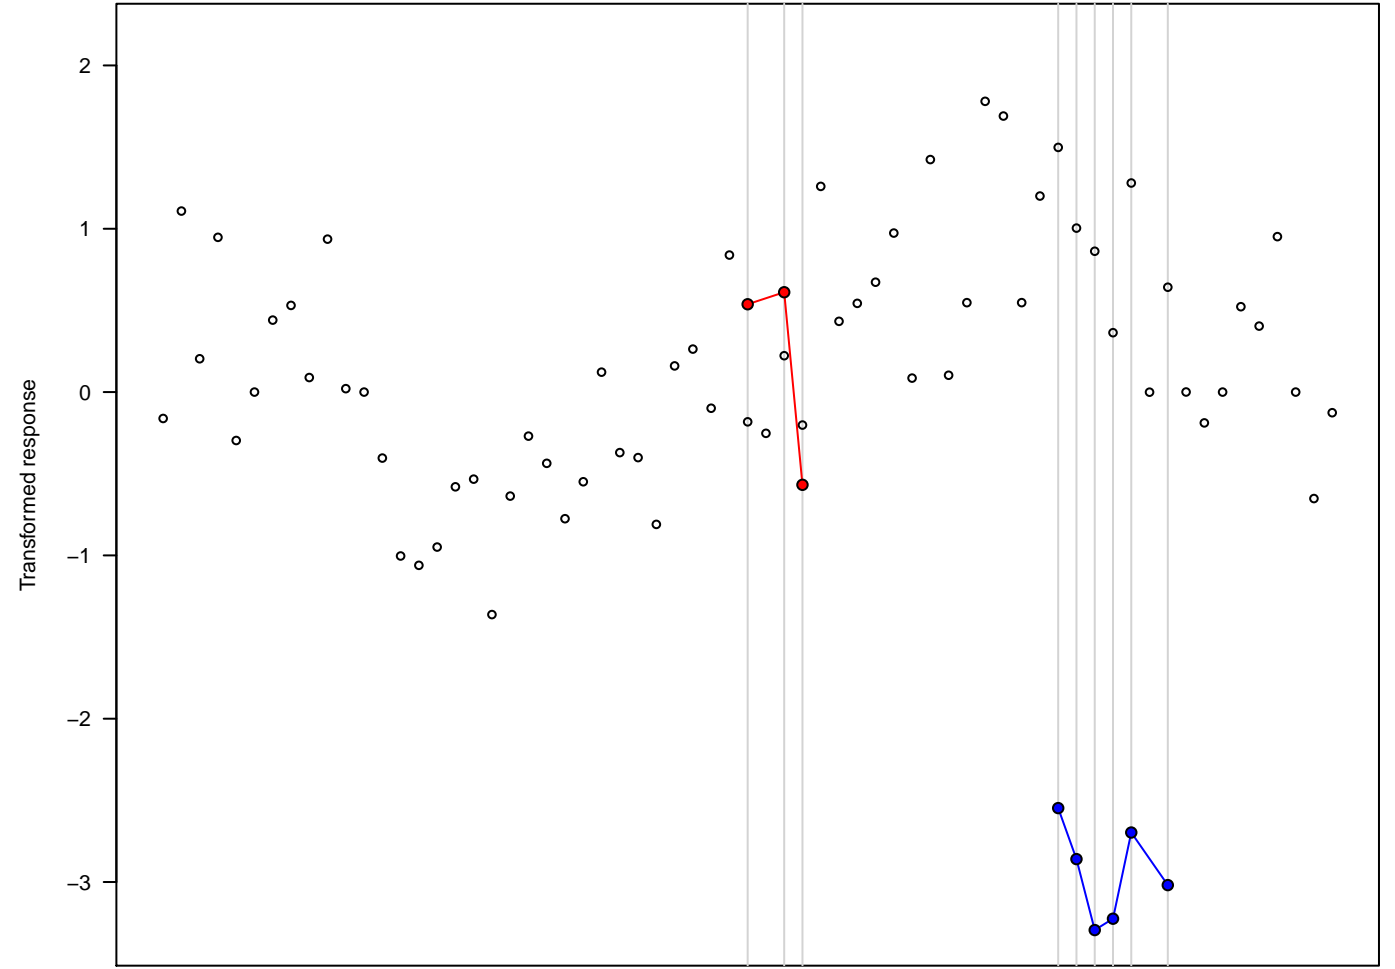

WTSI



ICS

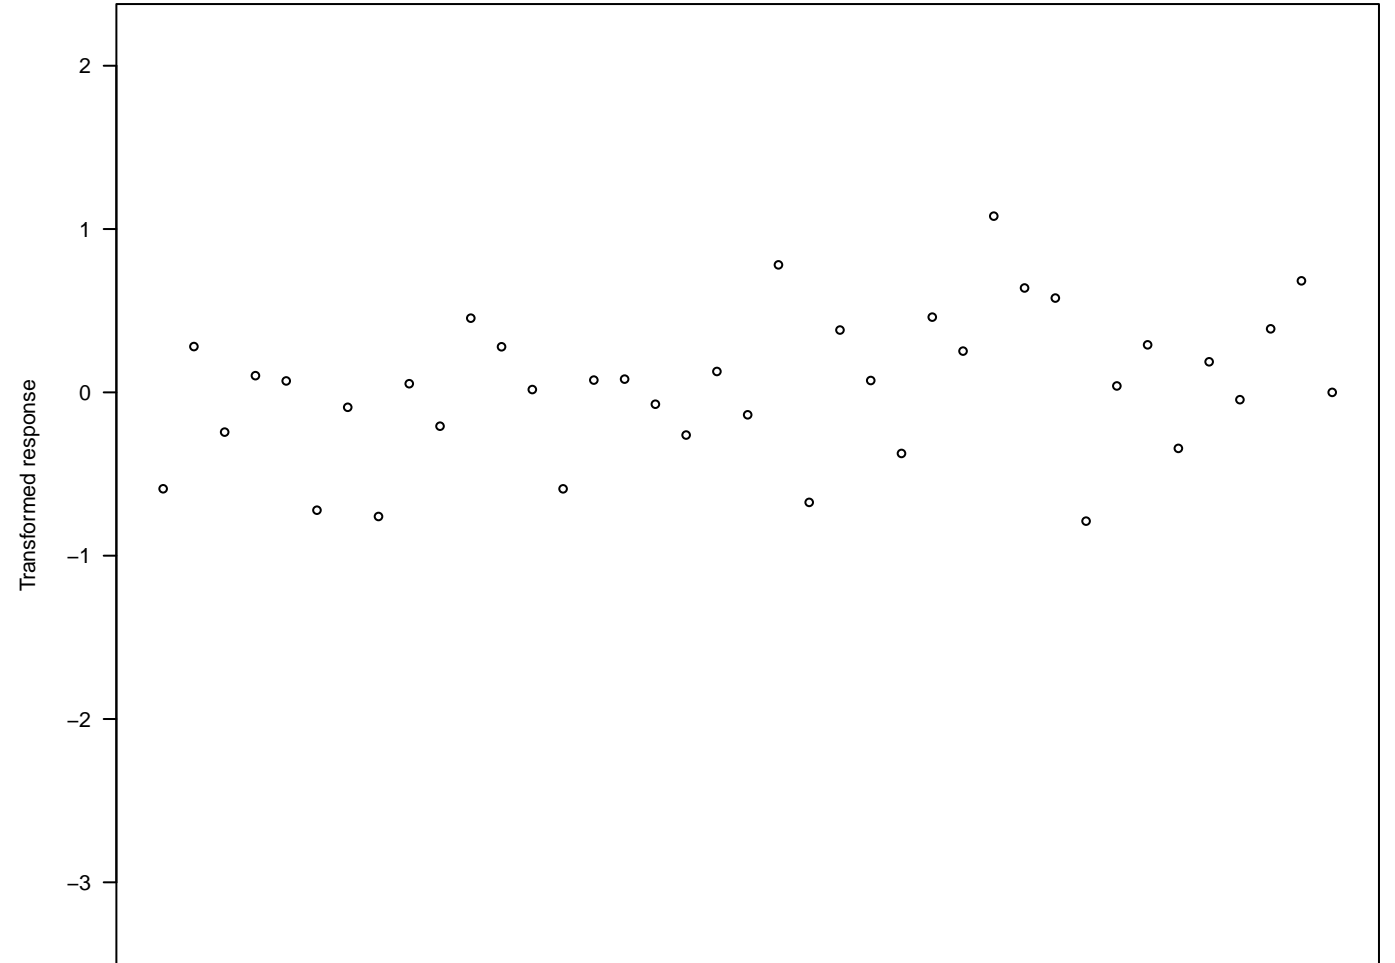

B cell CD19+ percentage  
(FACs Analysis)

HMGU

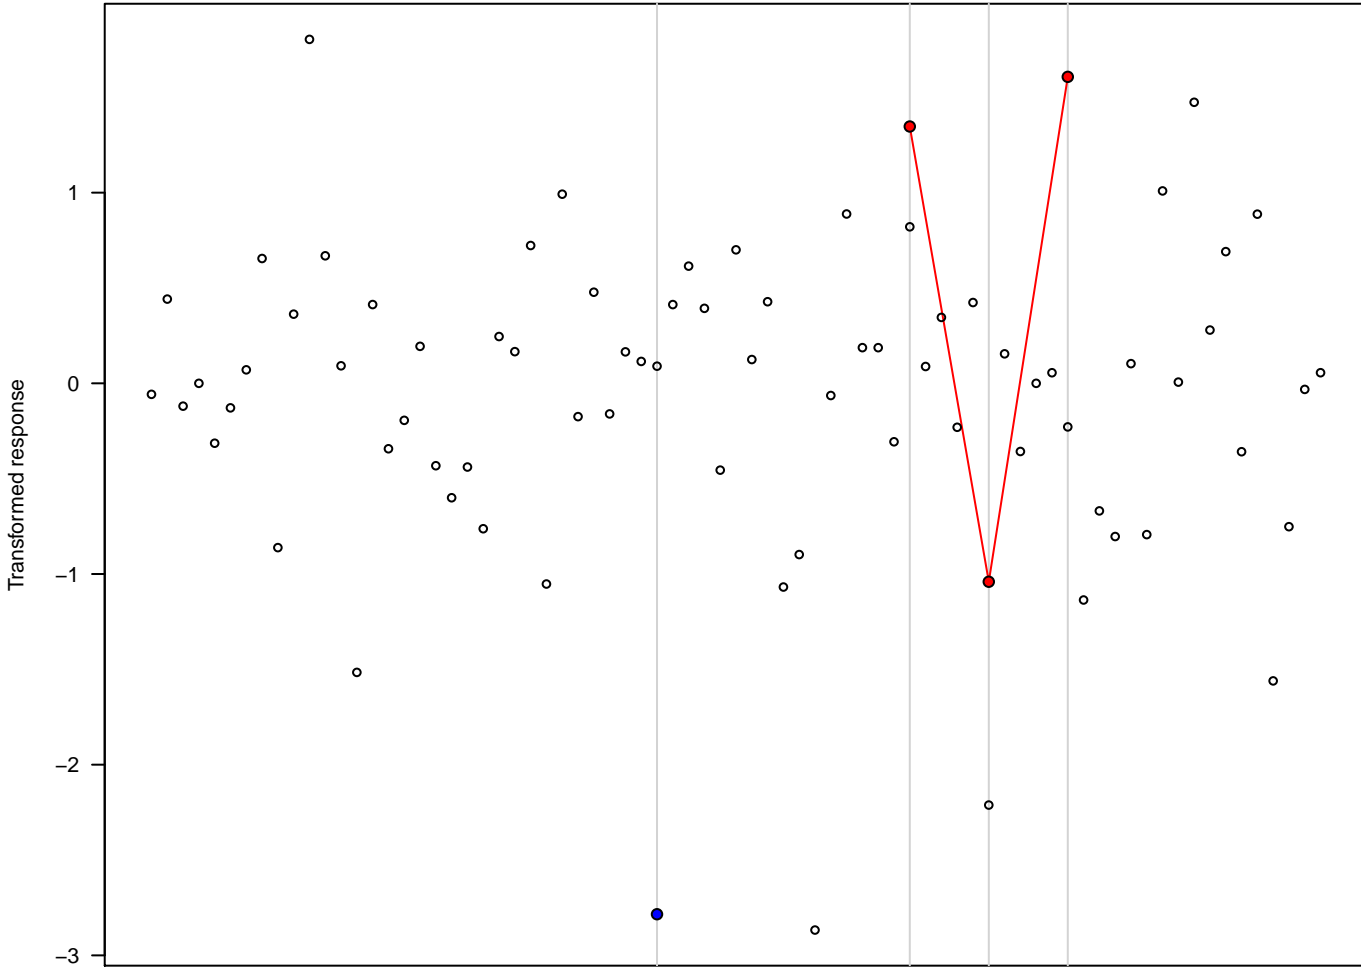

MRC Harwell

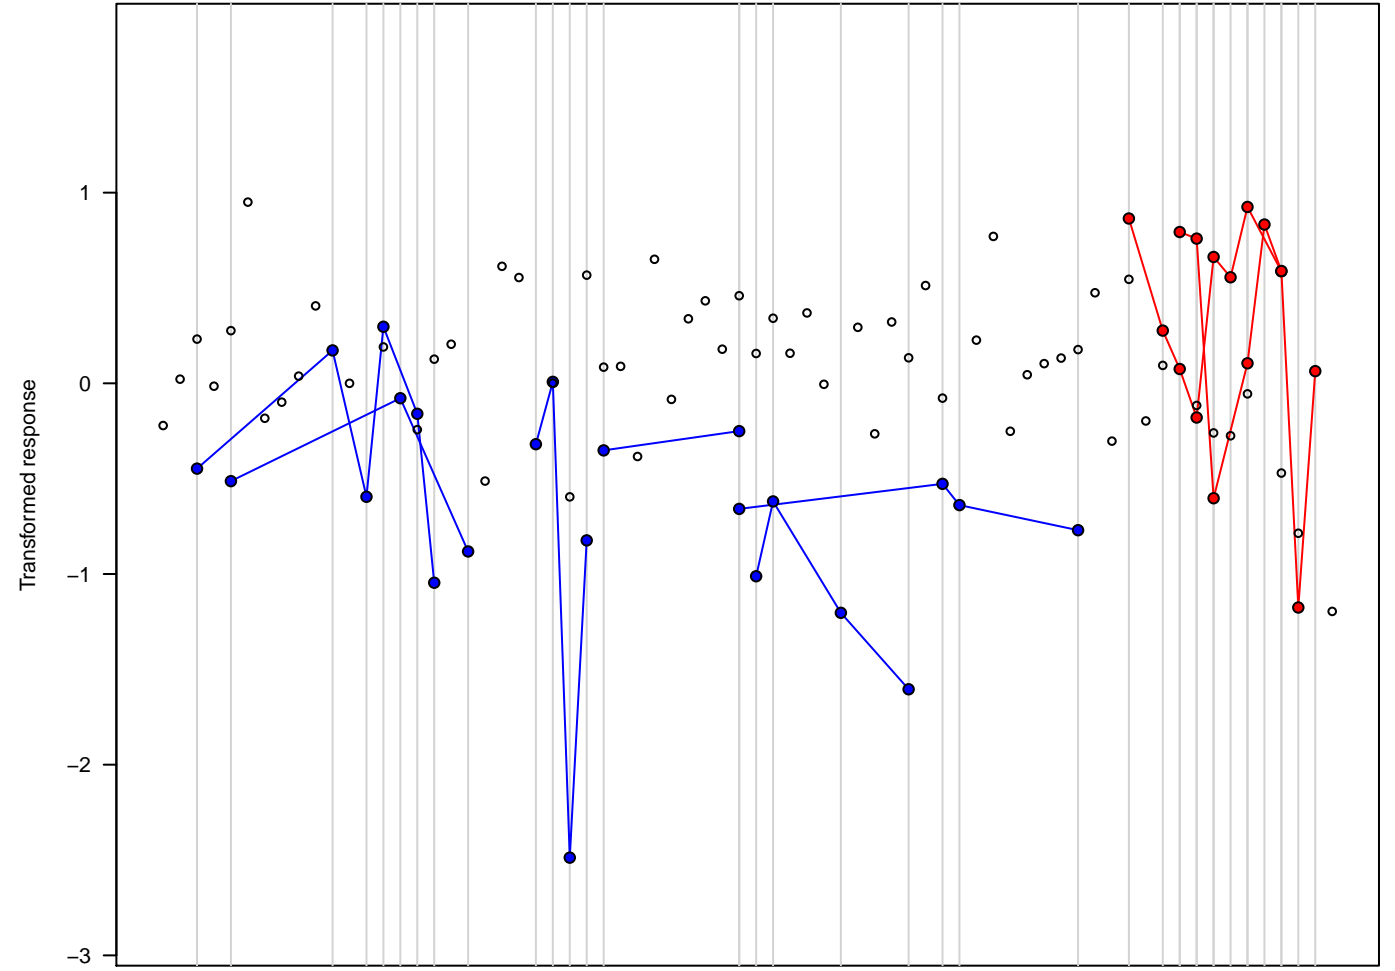

WTSI



ICS

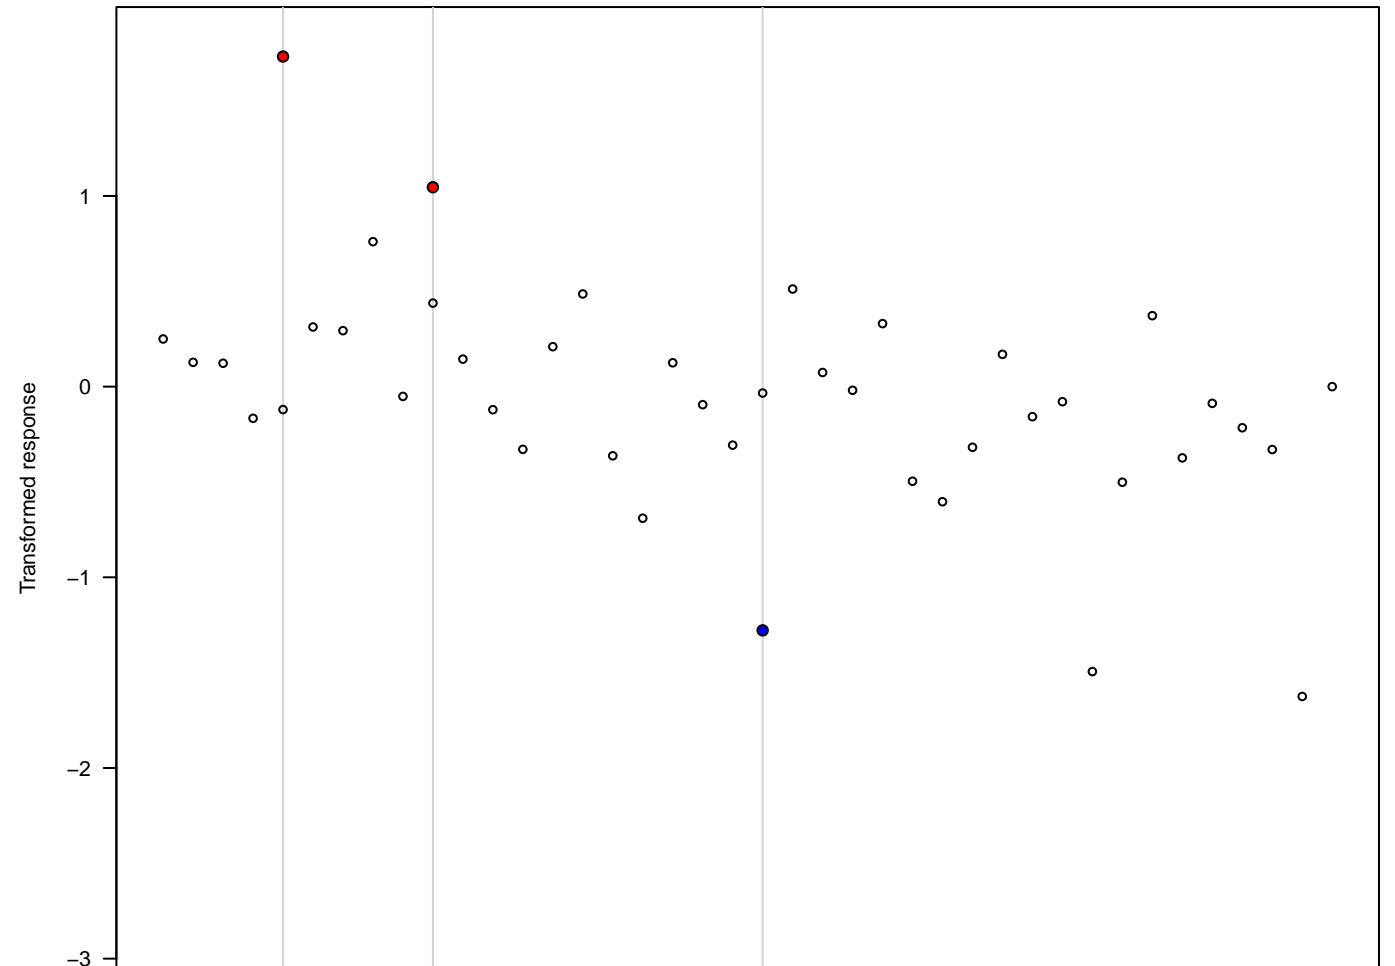

Mature B cells IgD+ percentage  
(FACs Analysis)

HMGU

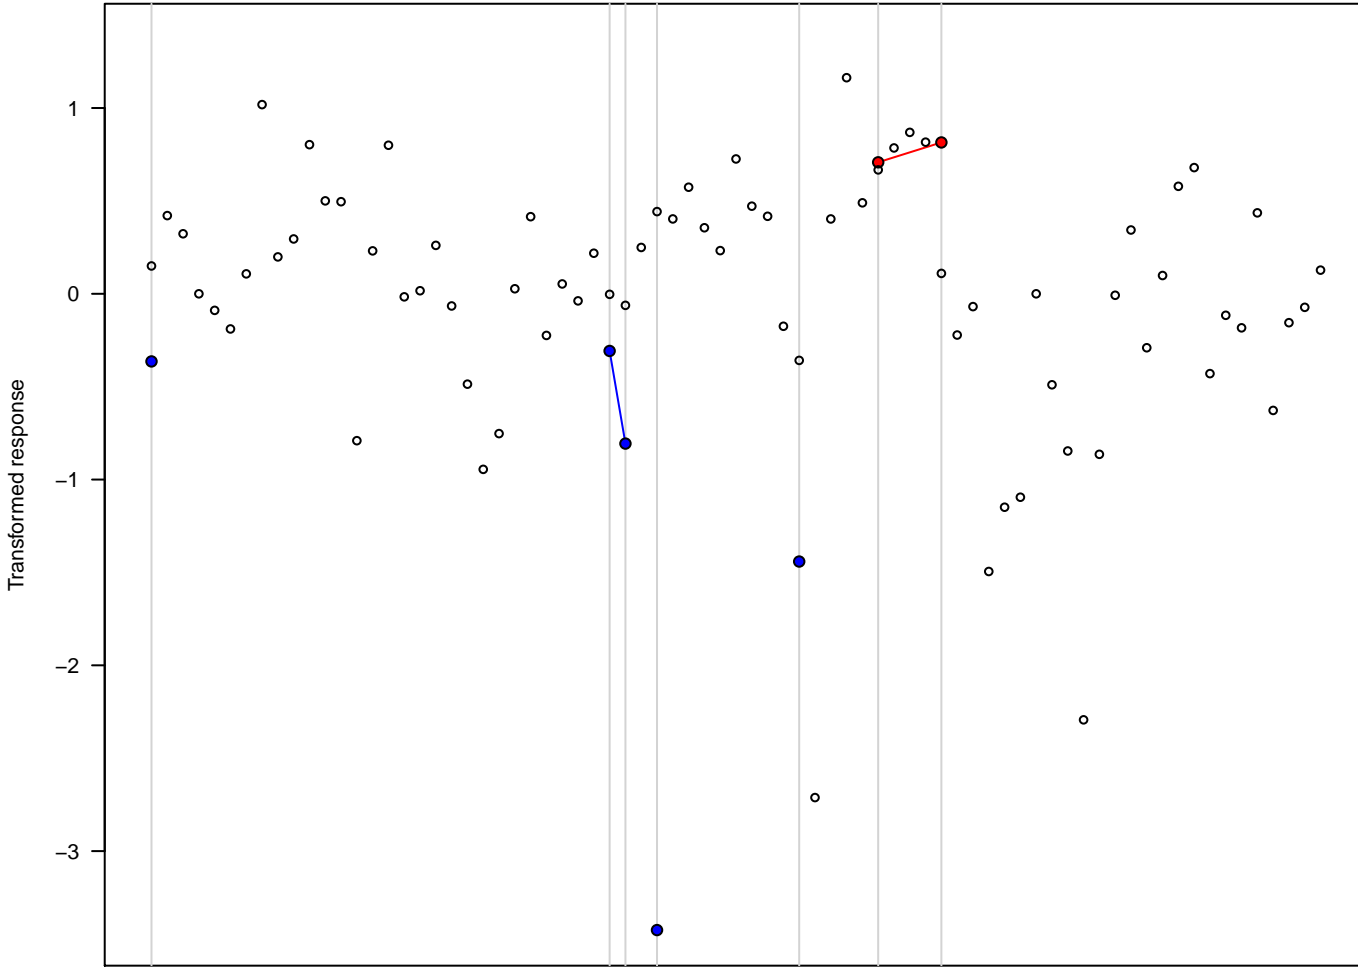

MRC Harwell

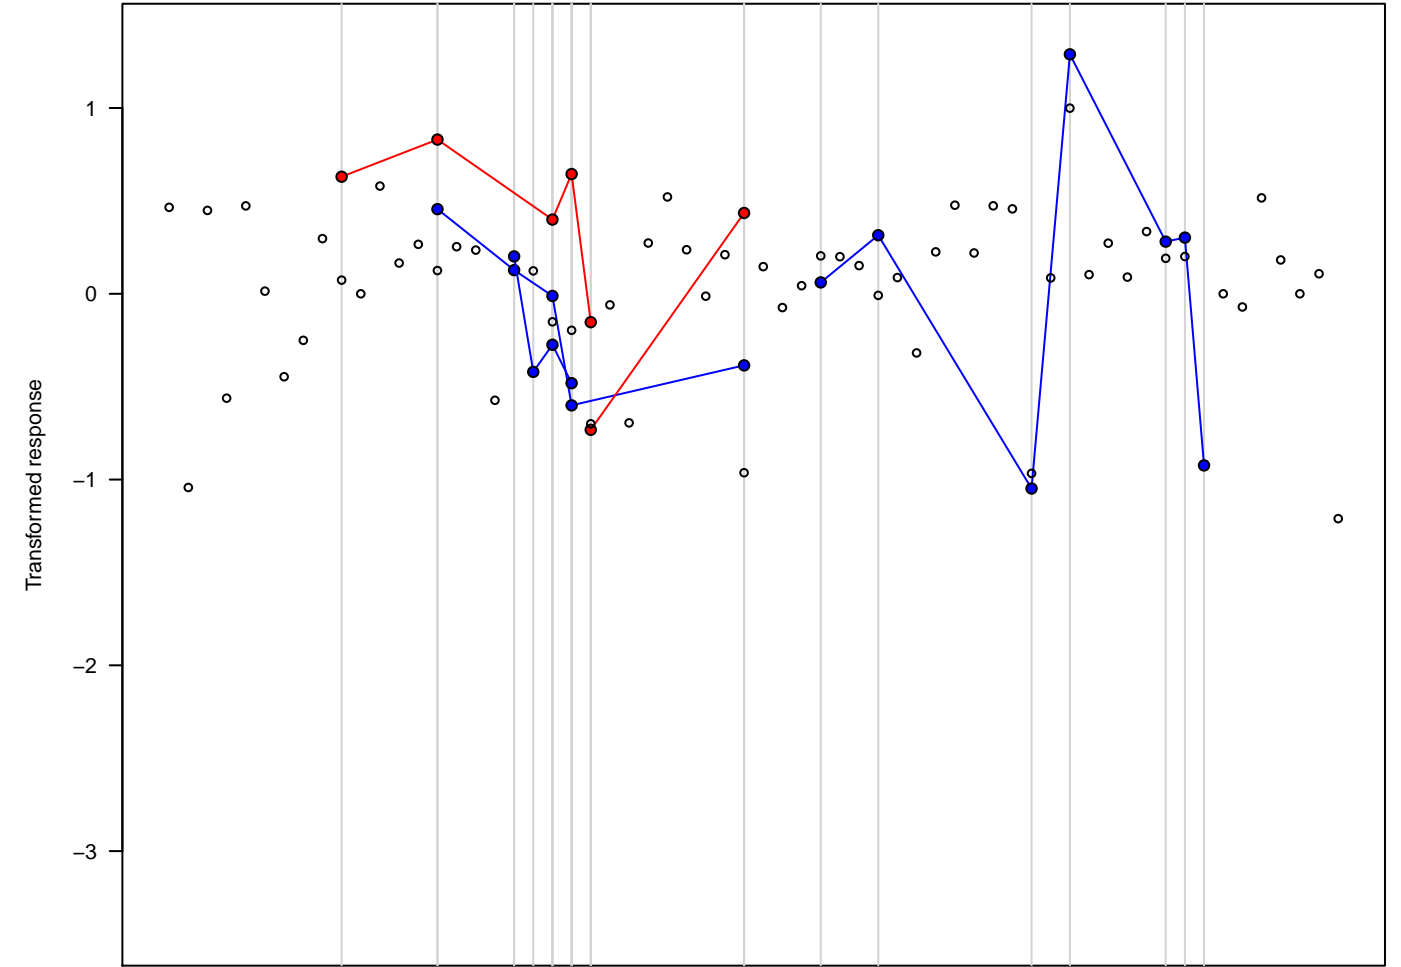

WTSI

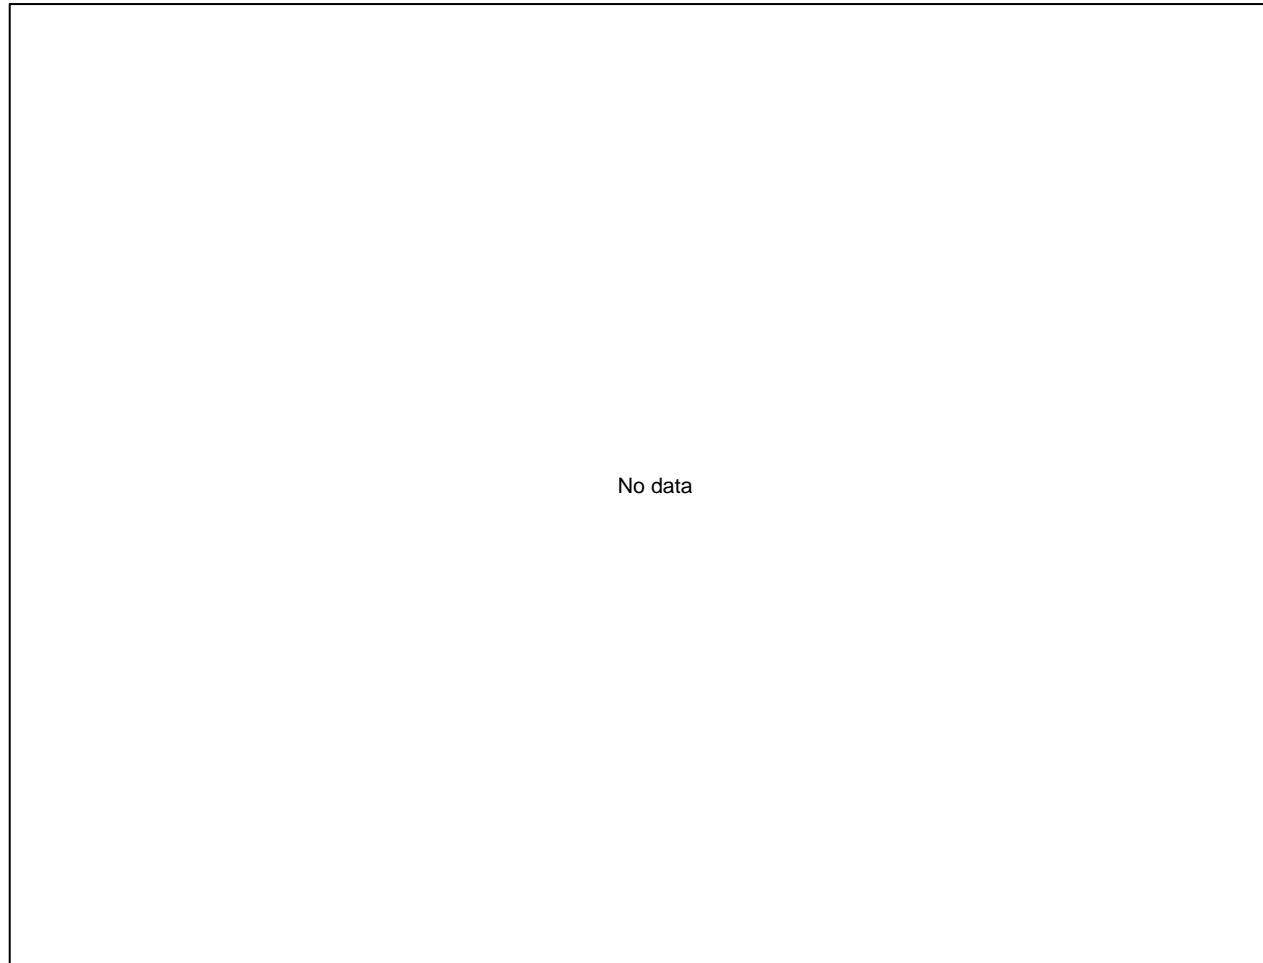

ICS

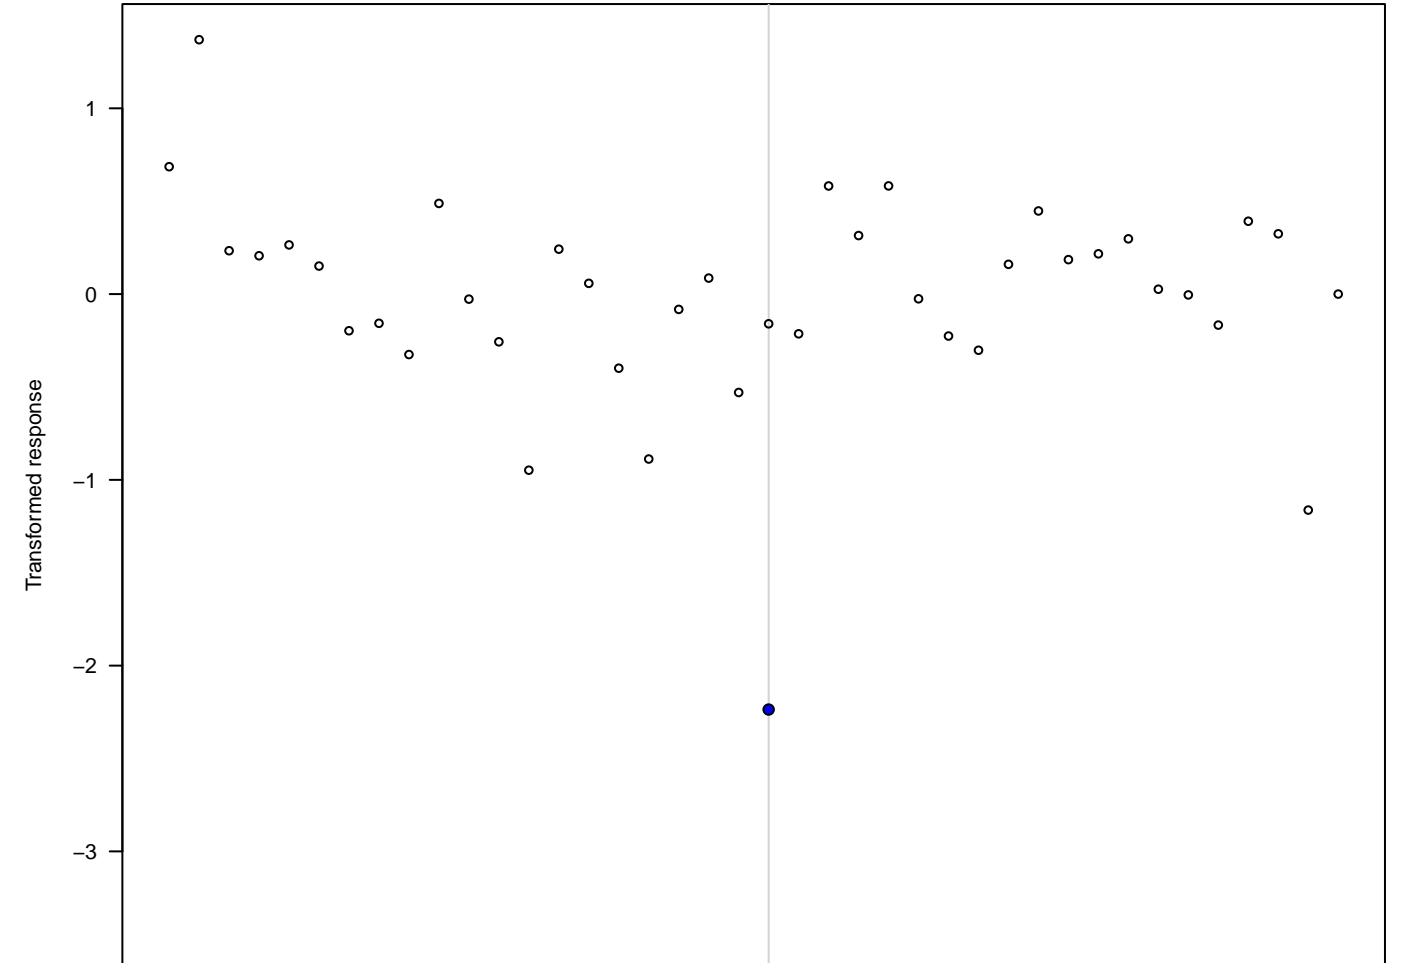

Granulocyte Gr1+ percentage  
(FACs Analysis)

HMGU

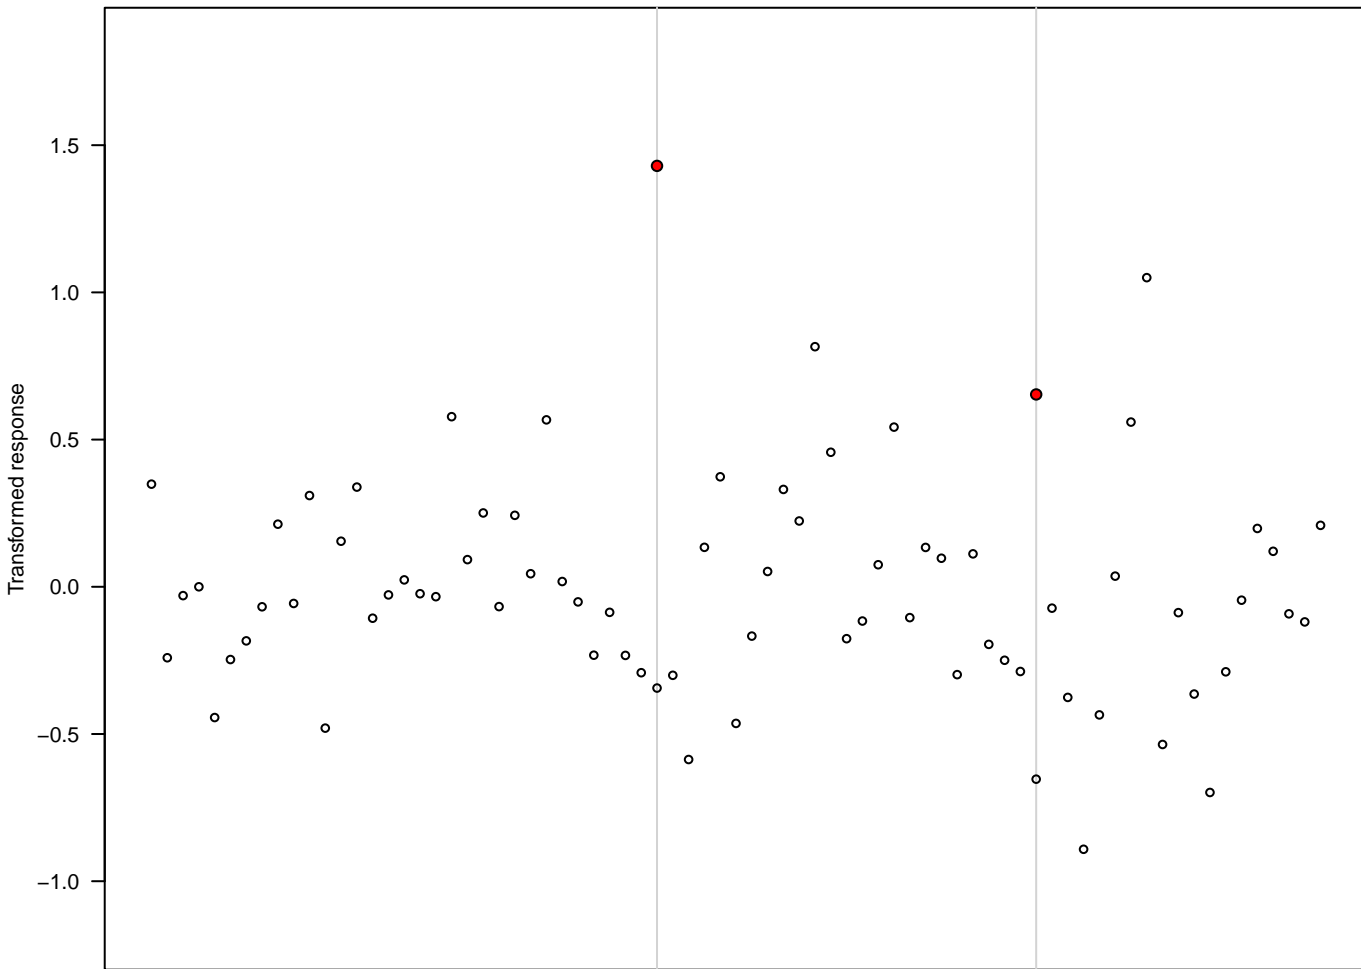

MRC Harwell

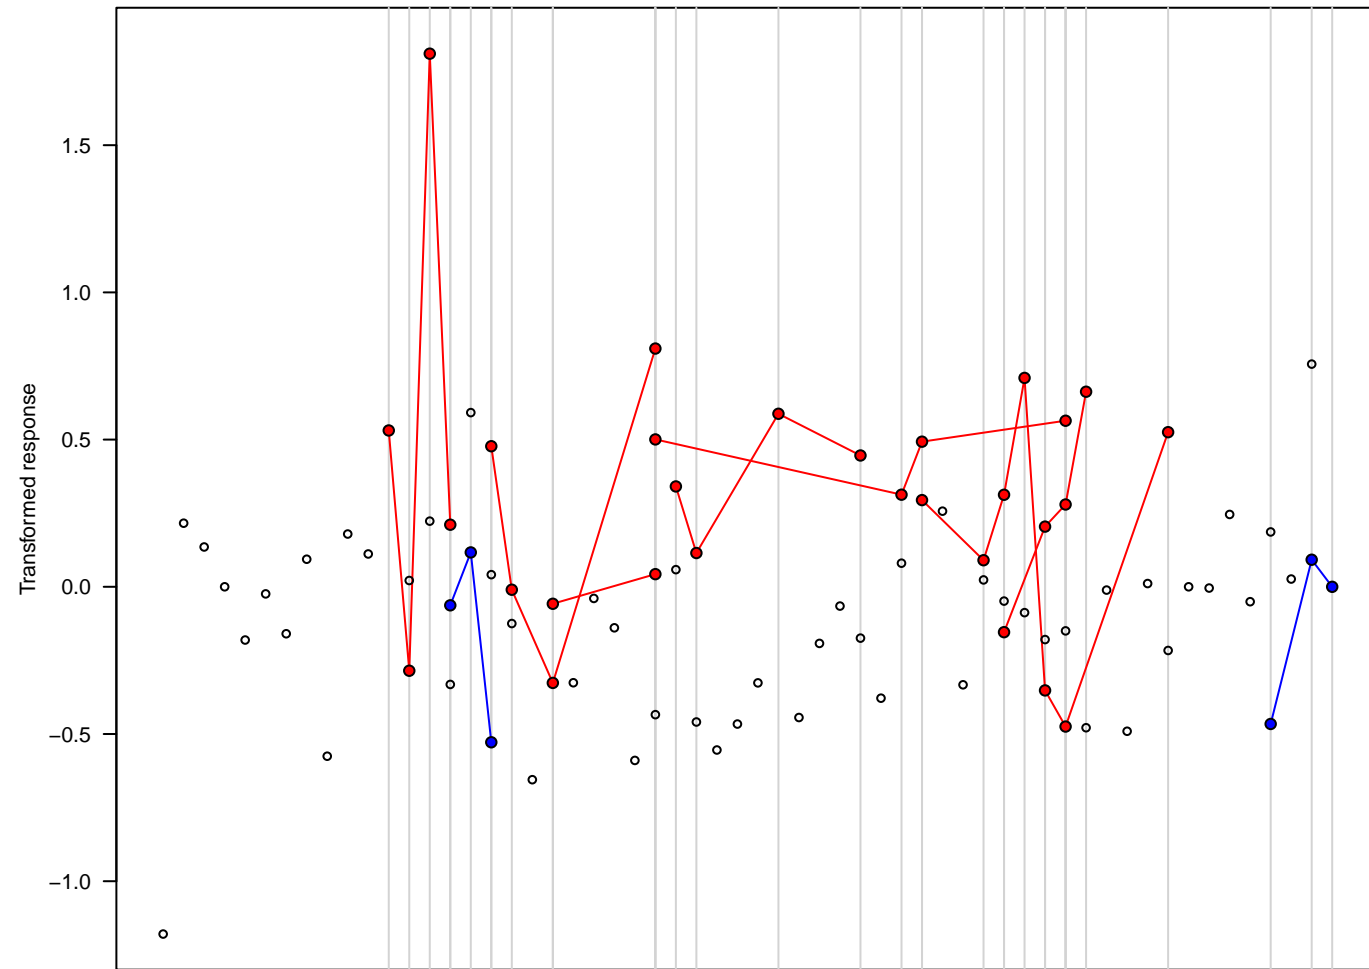

WTSI

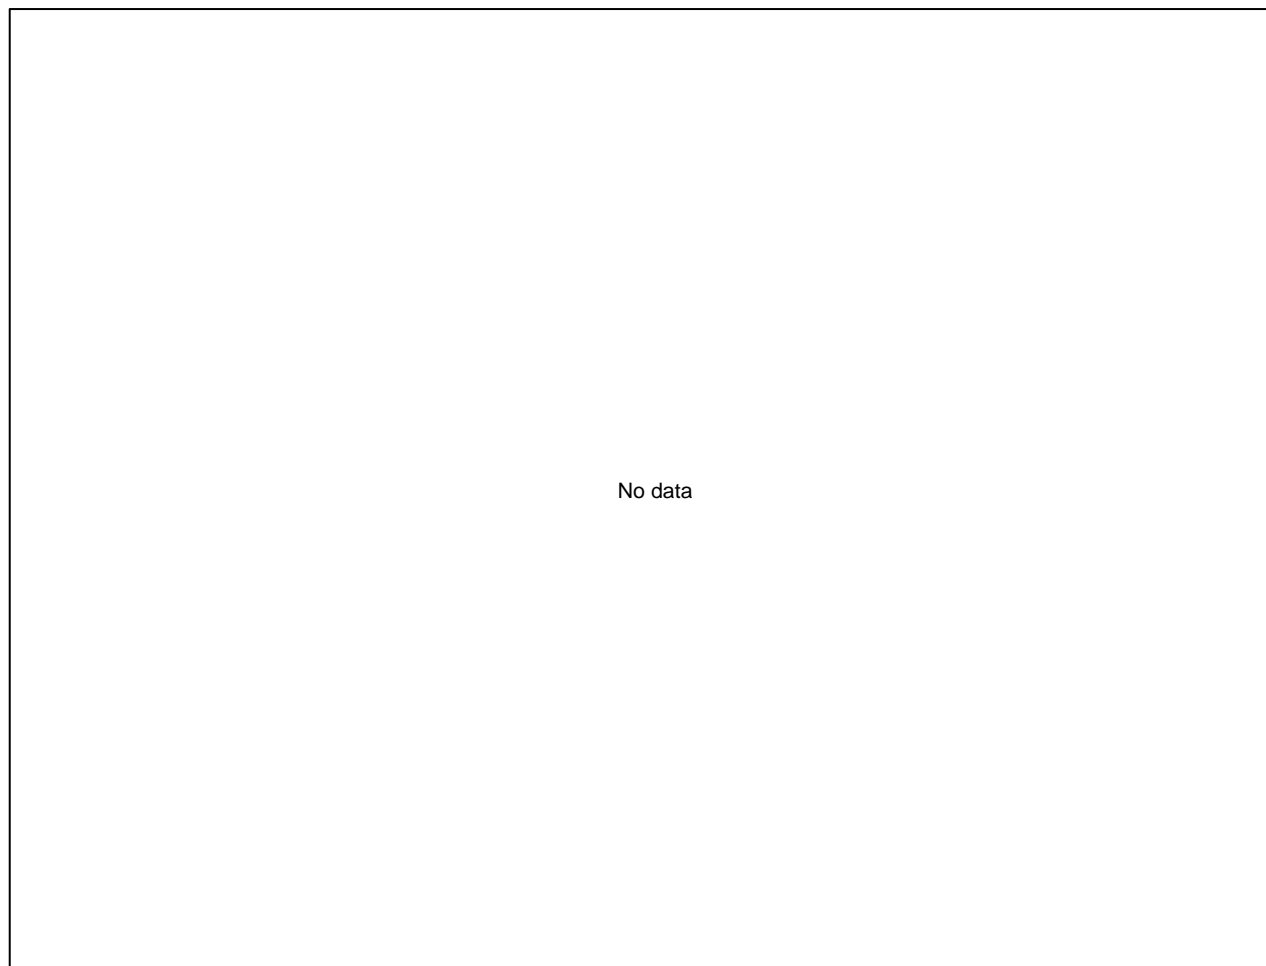

ICS

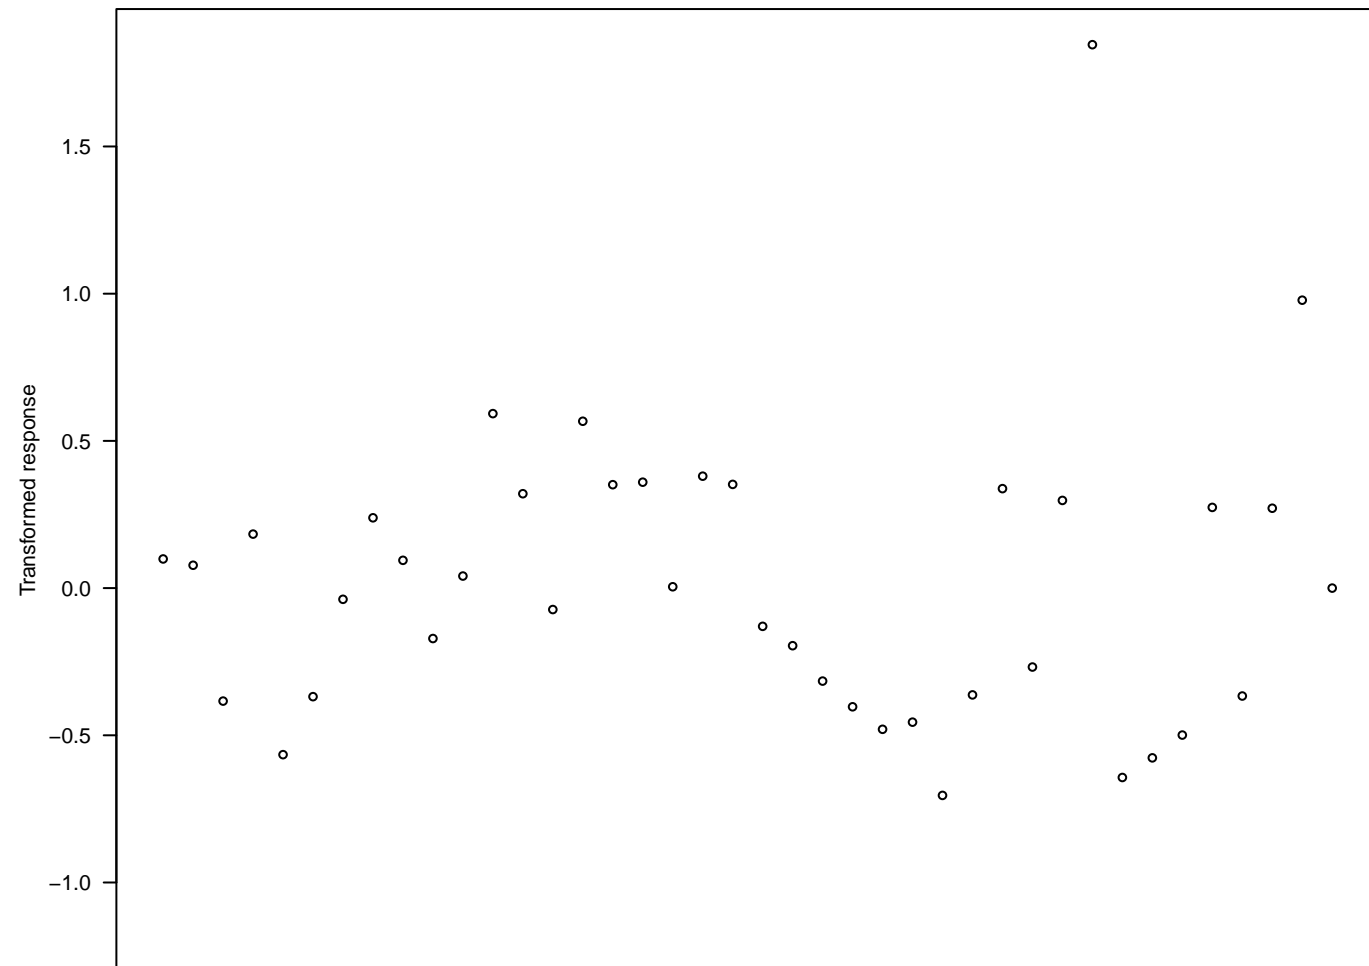

NK cell percentage  
(FACs Analysis)

HMGU

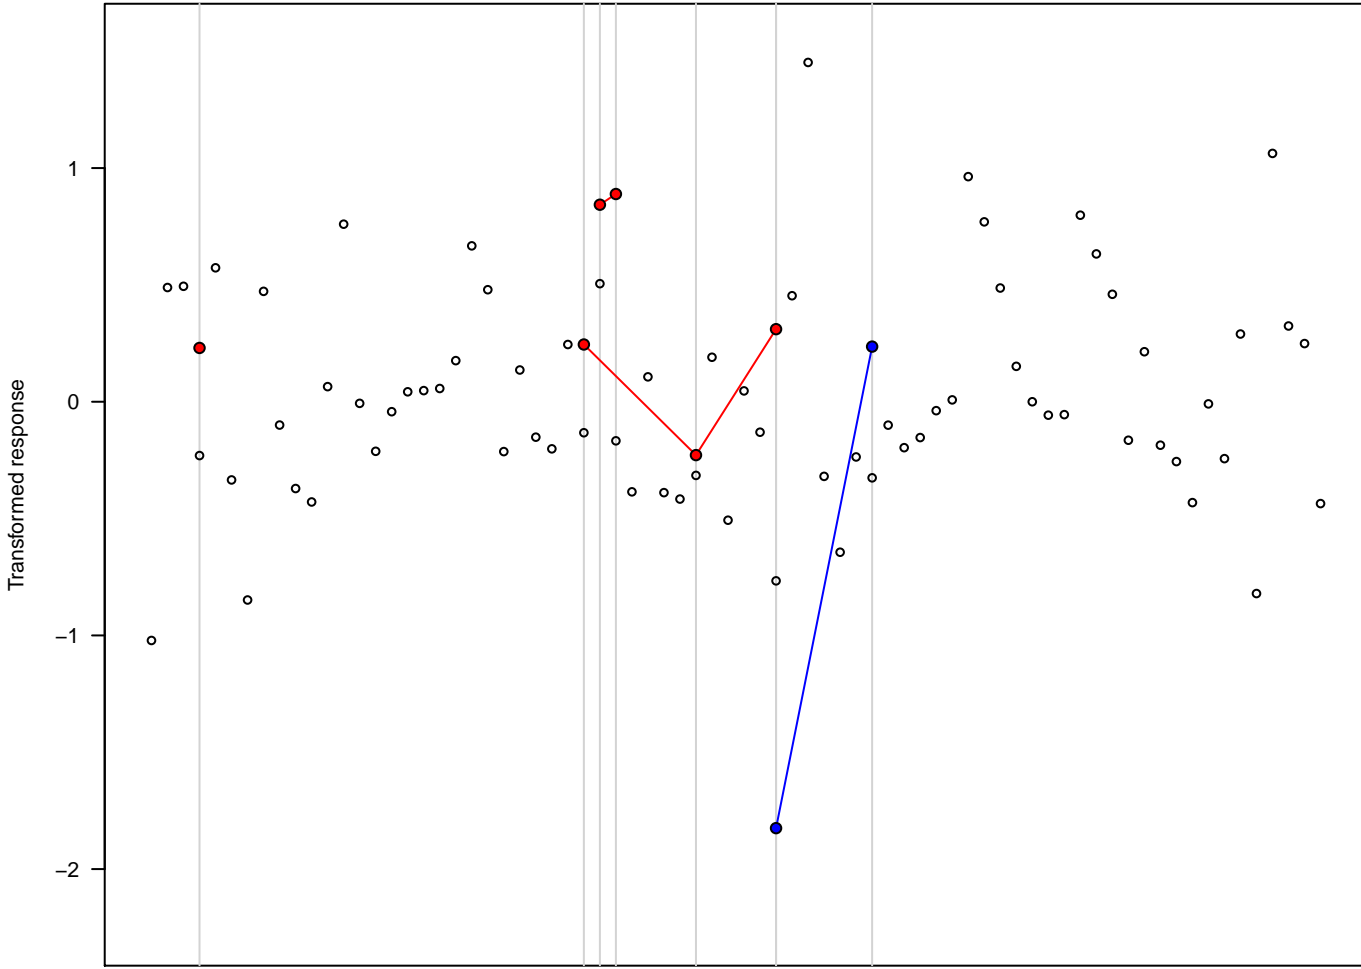

MRC Harwell

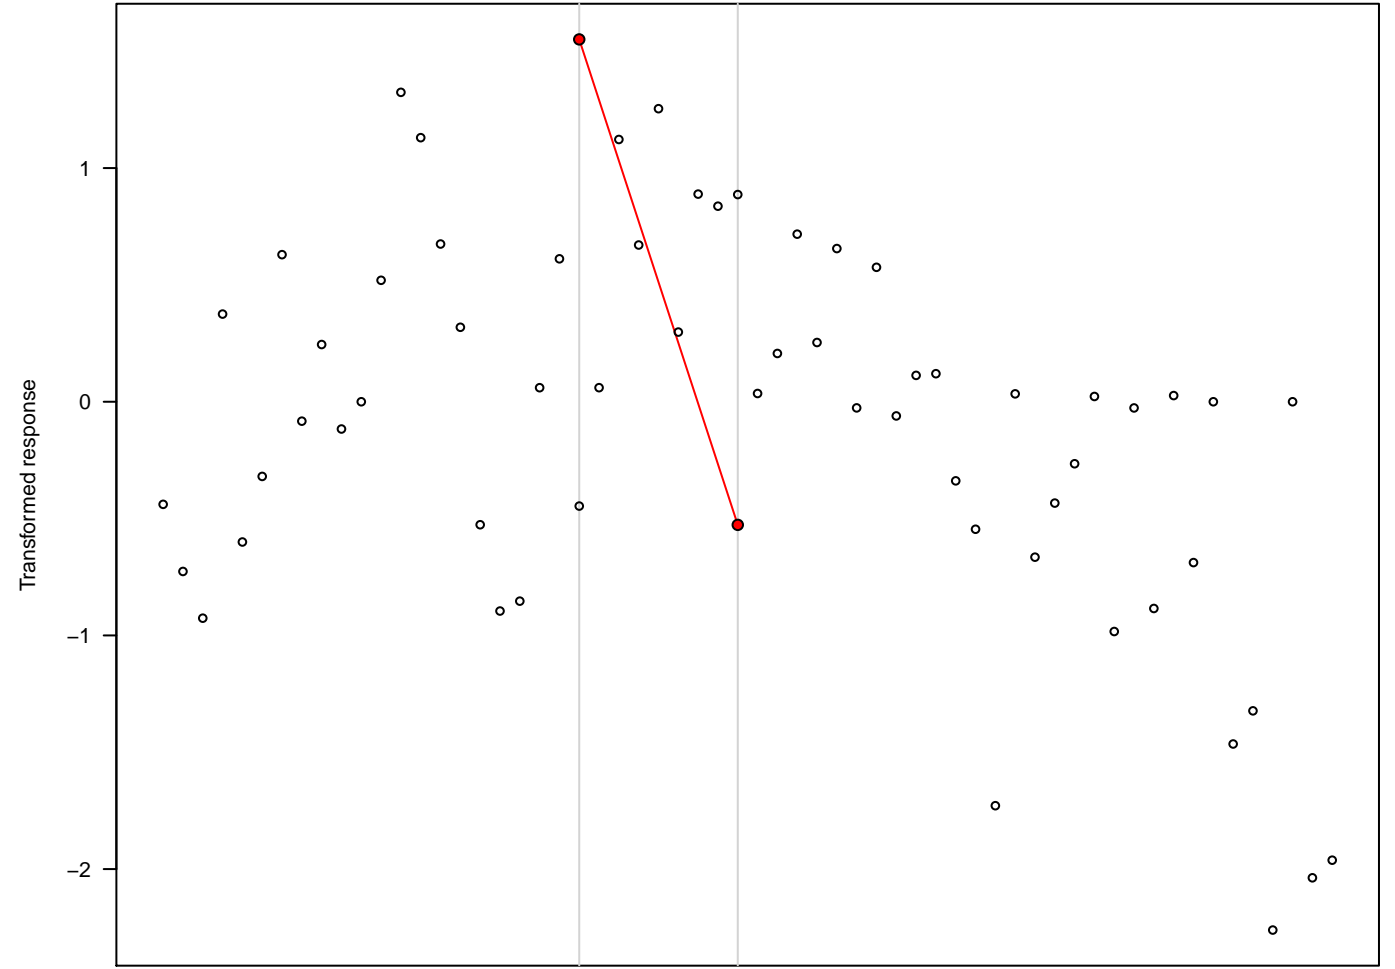

WTSI



ICS

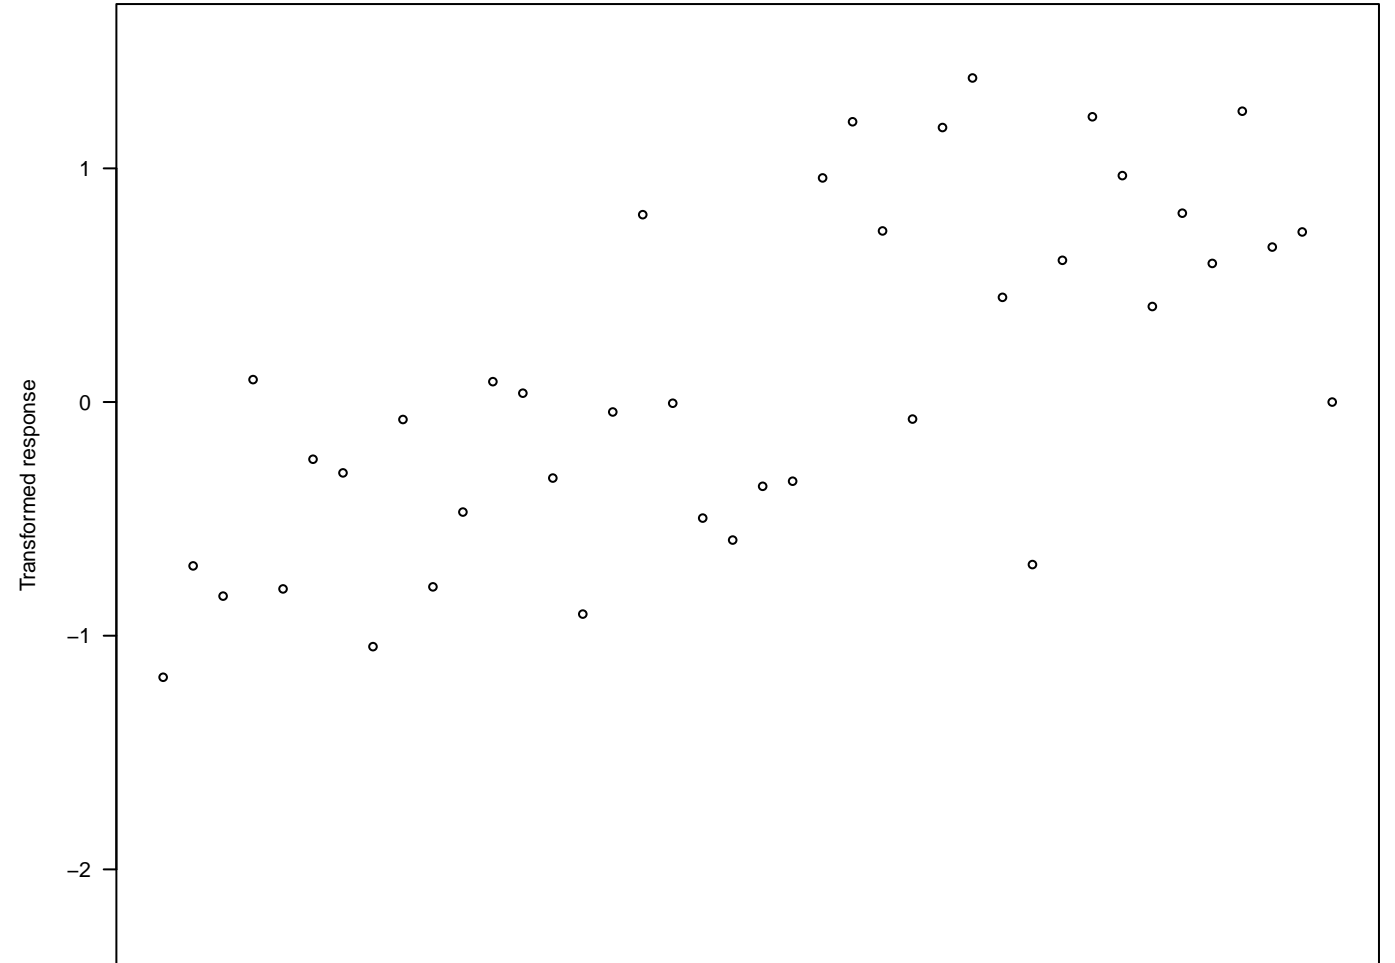

Monocyte gate  
(FACs Analysis)

HMGU

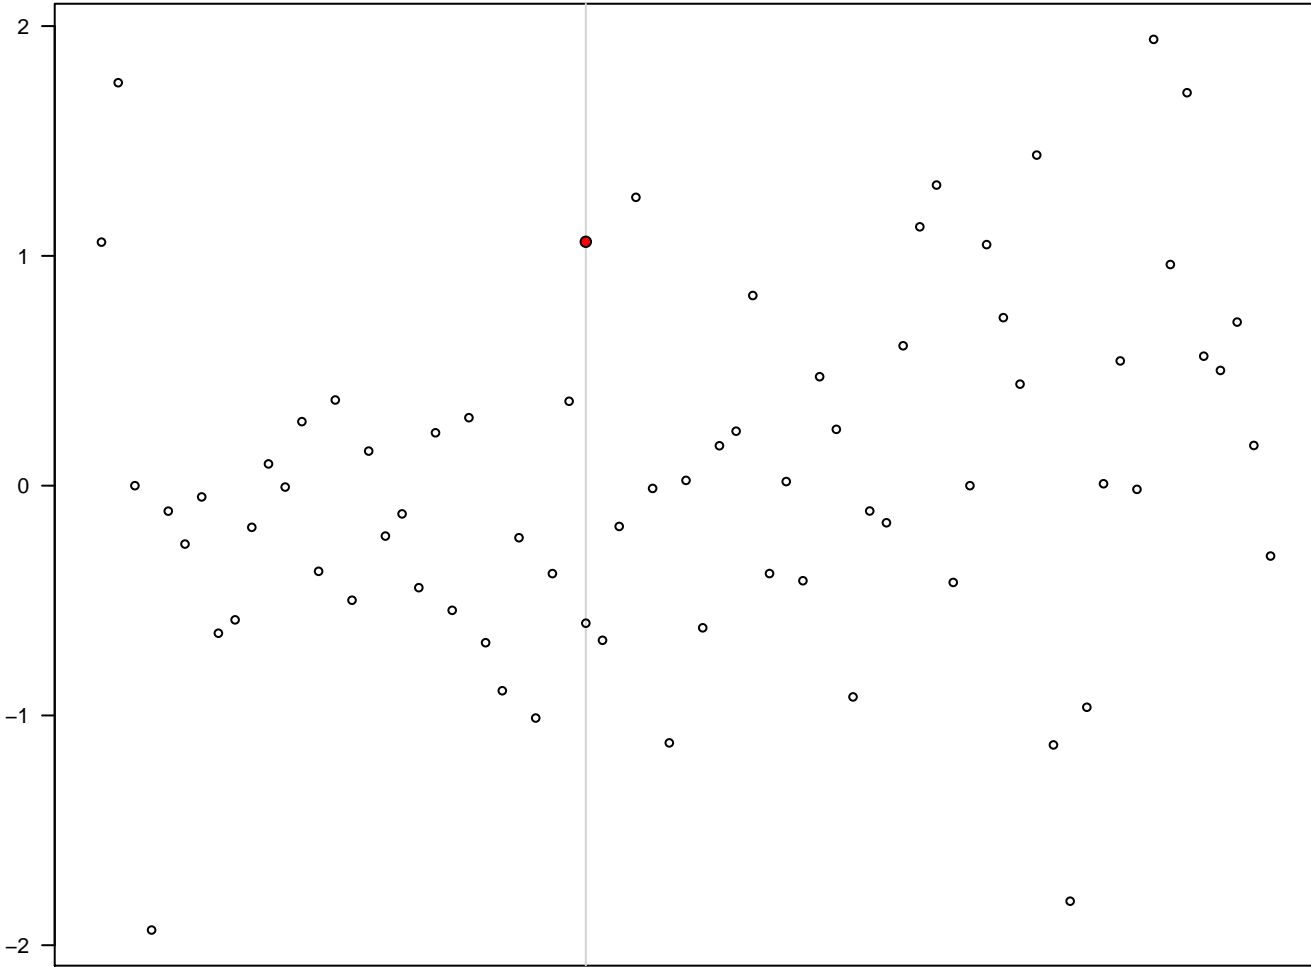

MRC Harwell

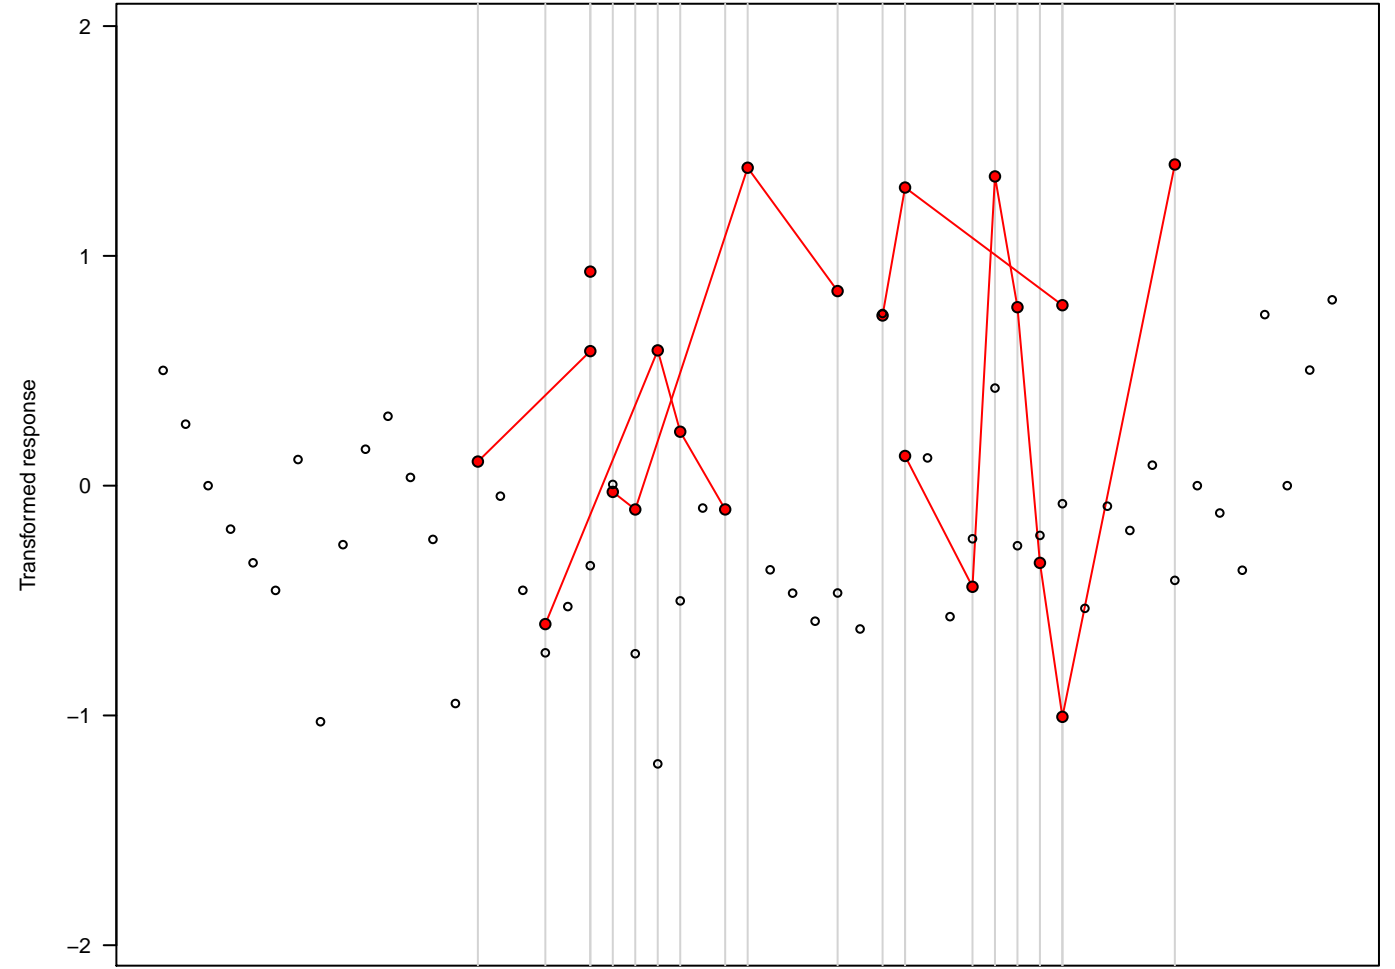

WTSI



ICS

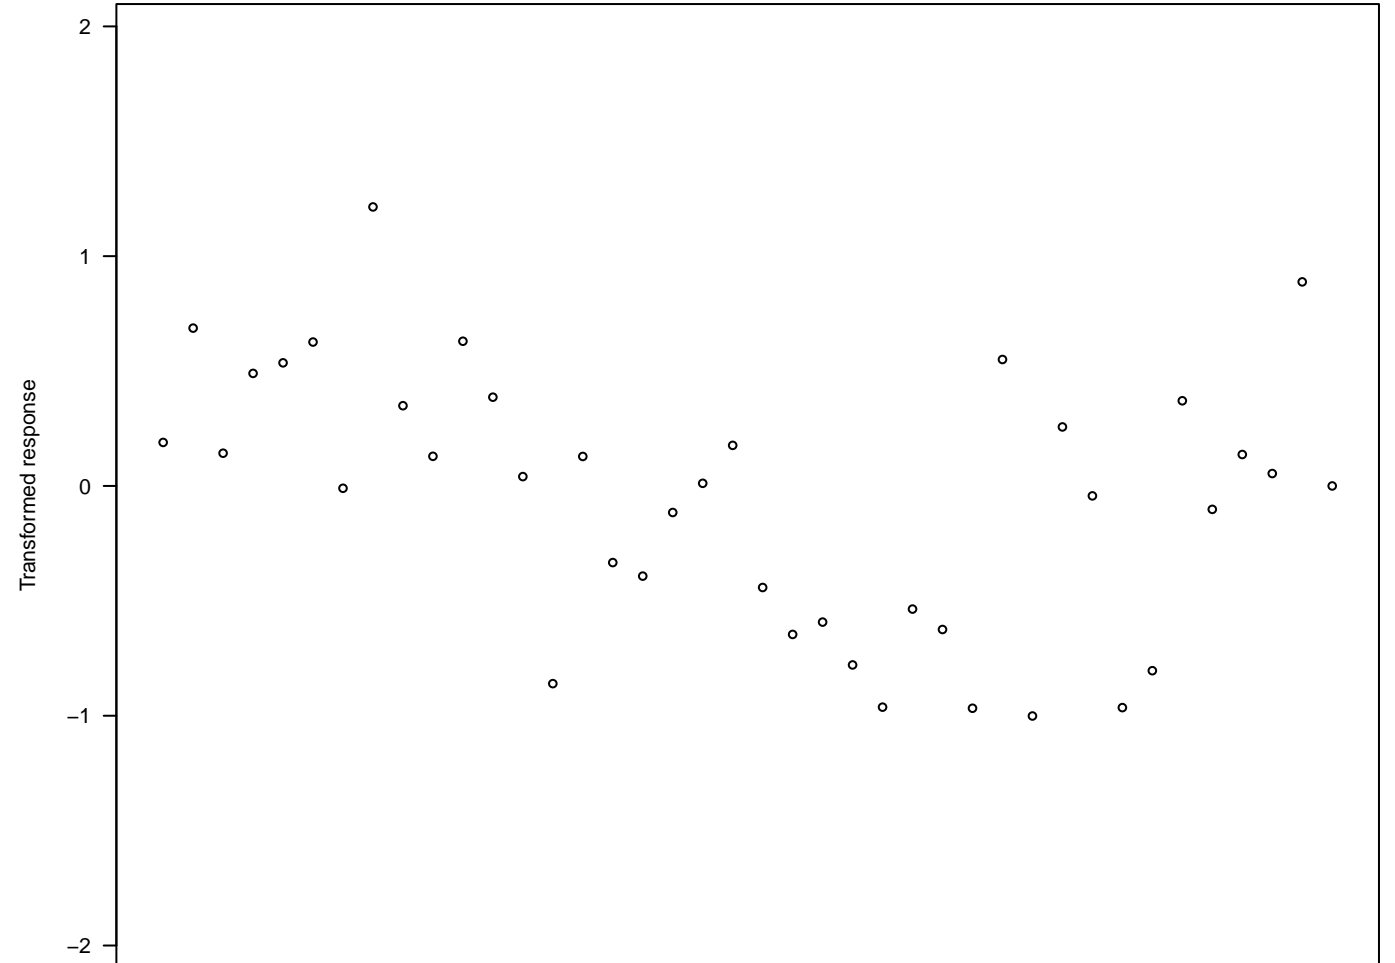



Heart weight  
(Heart weight/tibia length)

HMGU

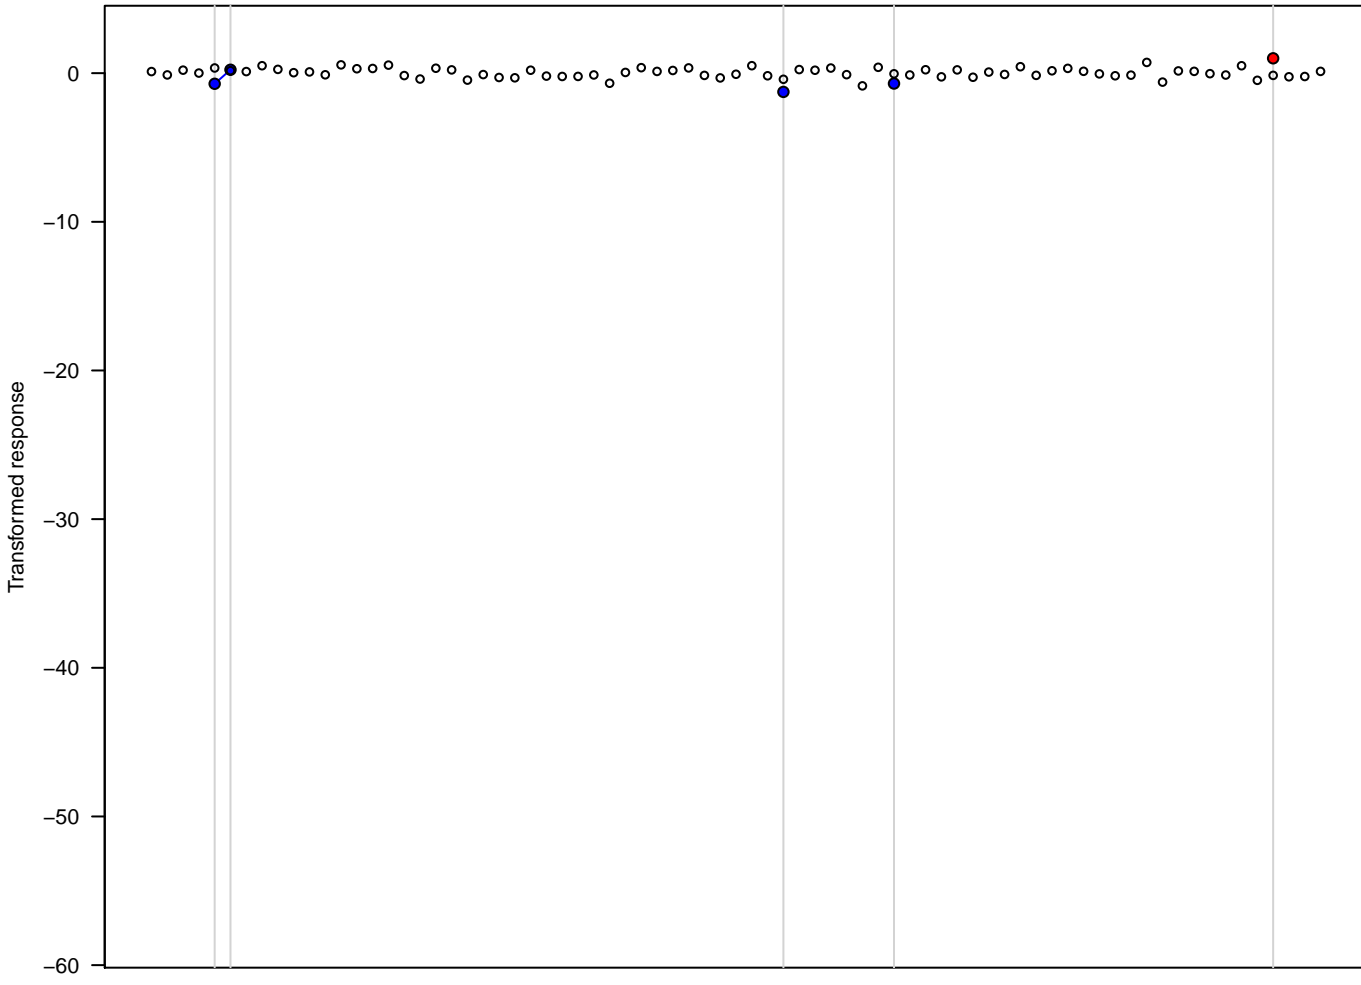

MRC Harwell

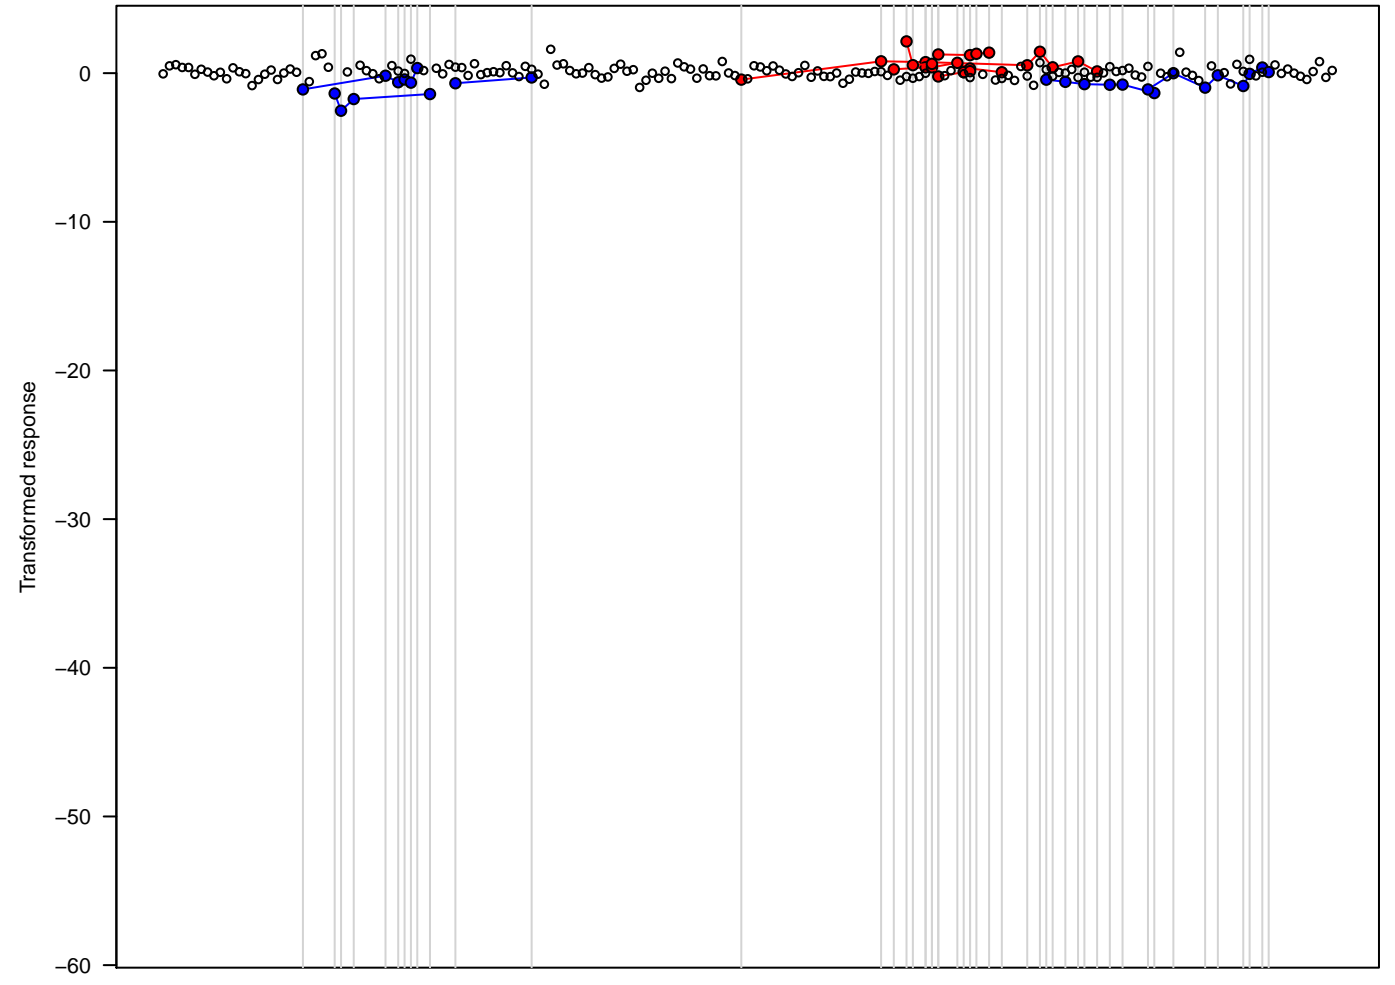

WTSI

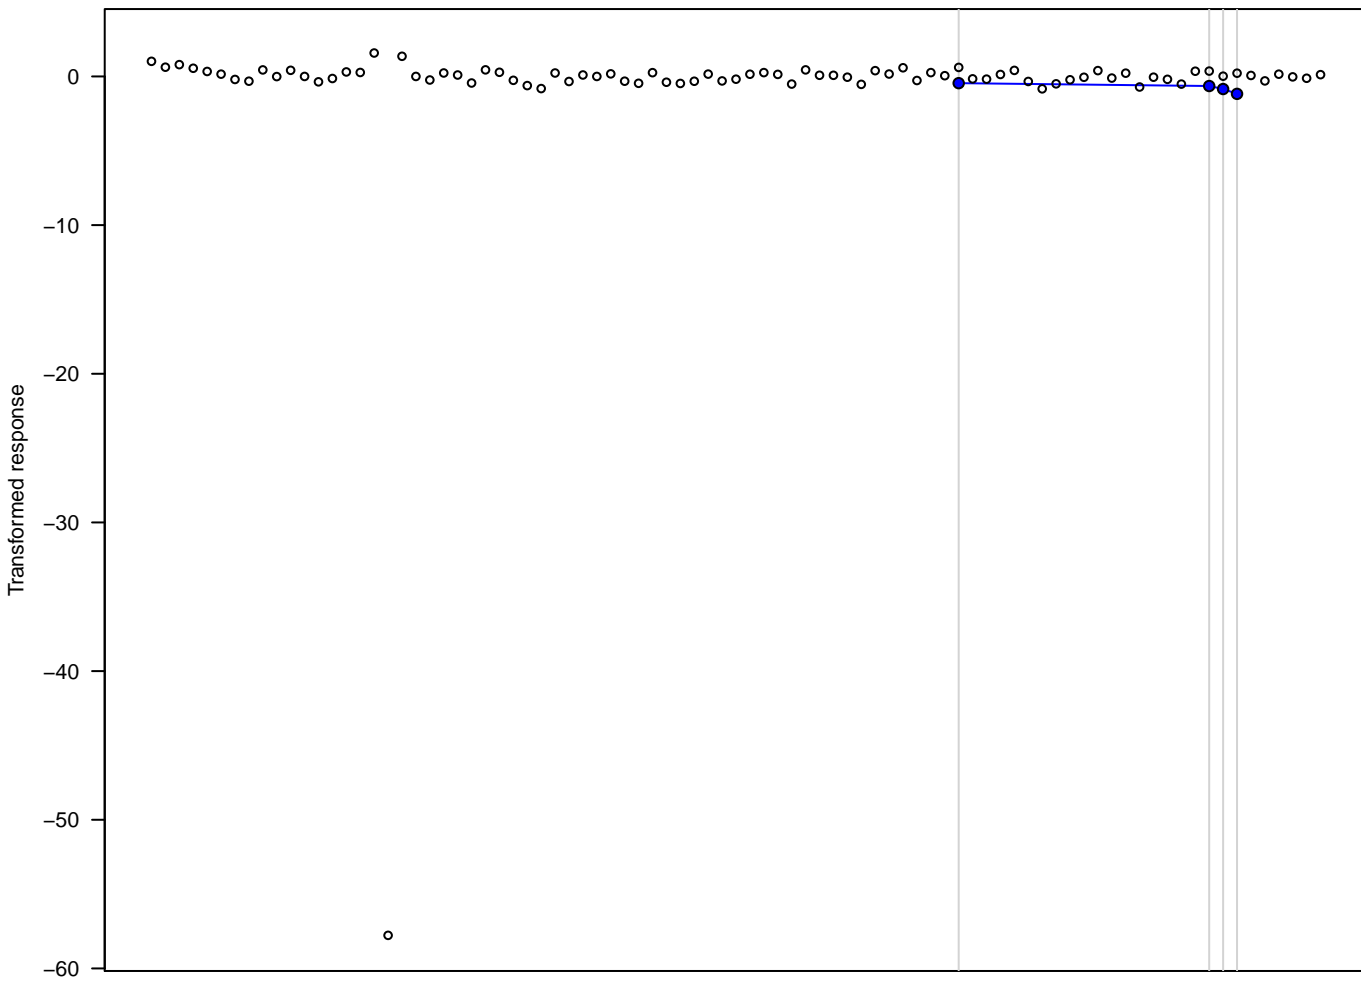

ICS

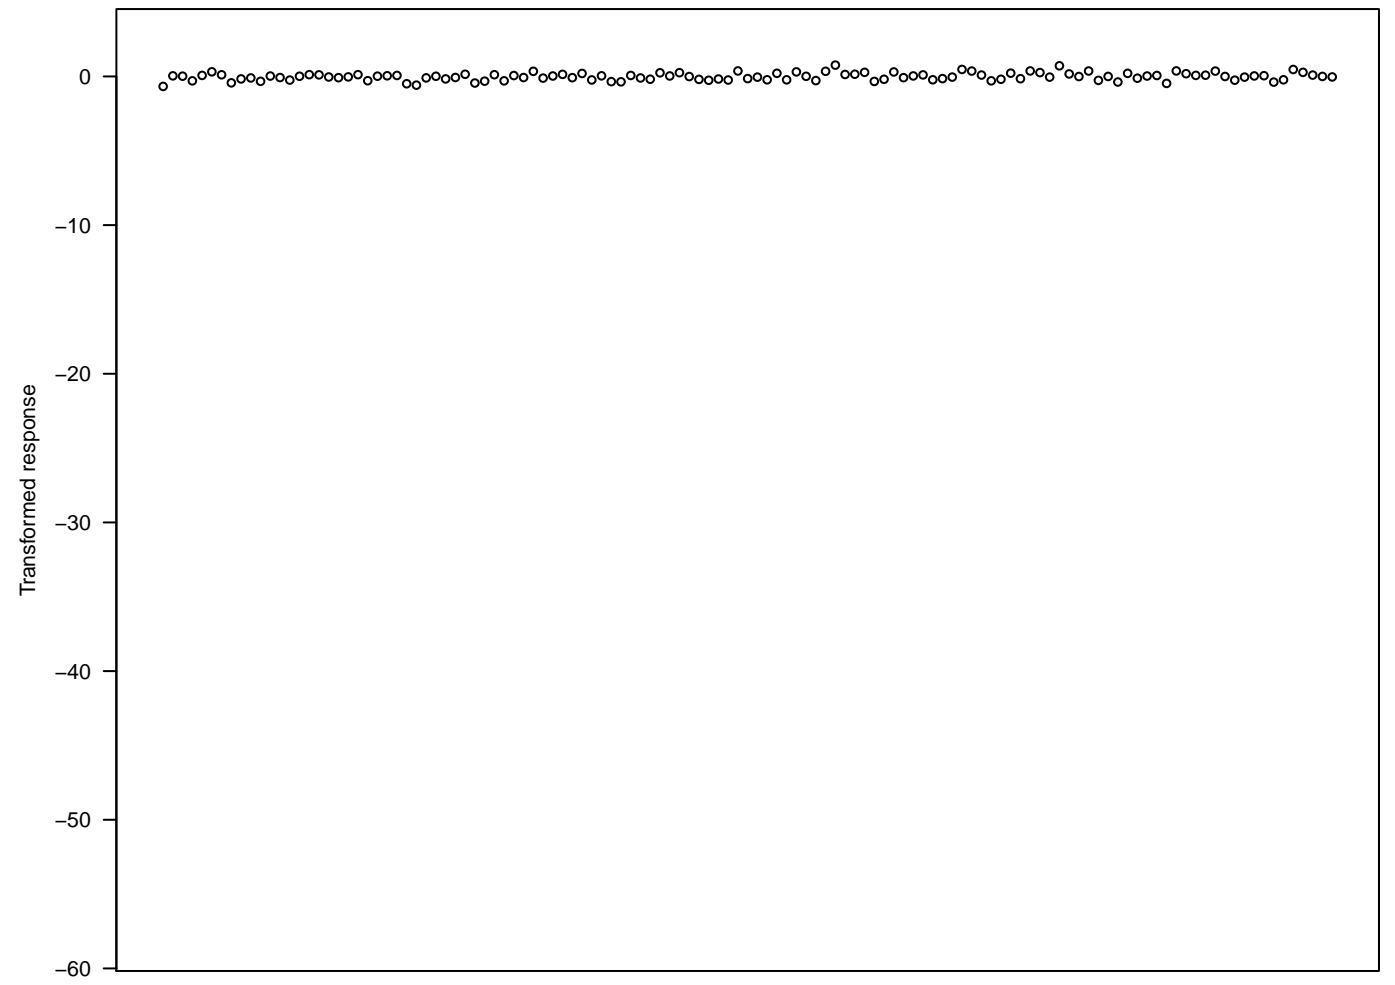

Tibia length  
(Heart weight/tibia length)

HMGU



MRC Harwell

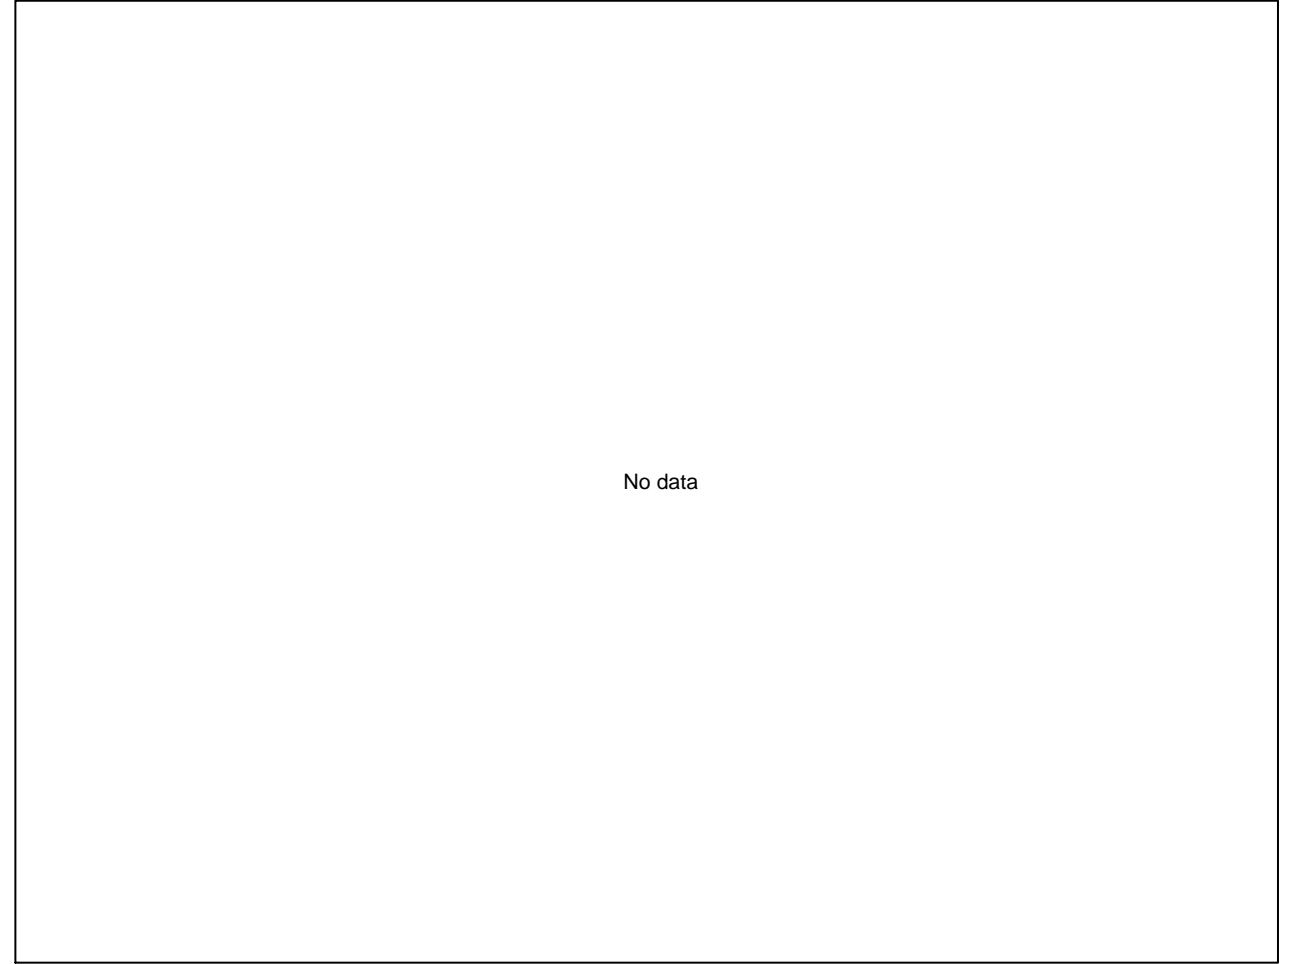

WTSI



ICS

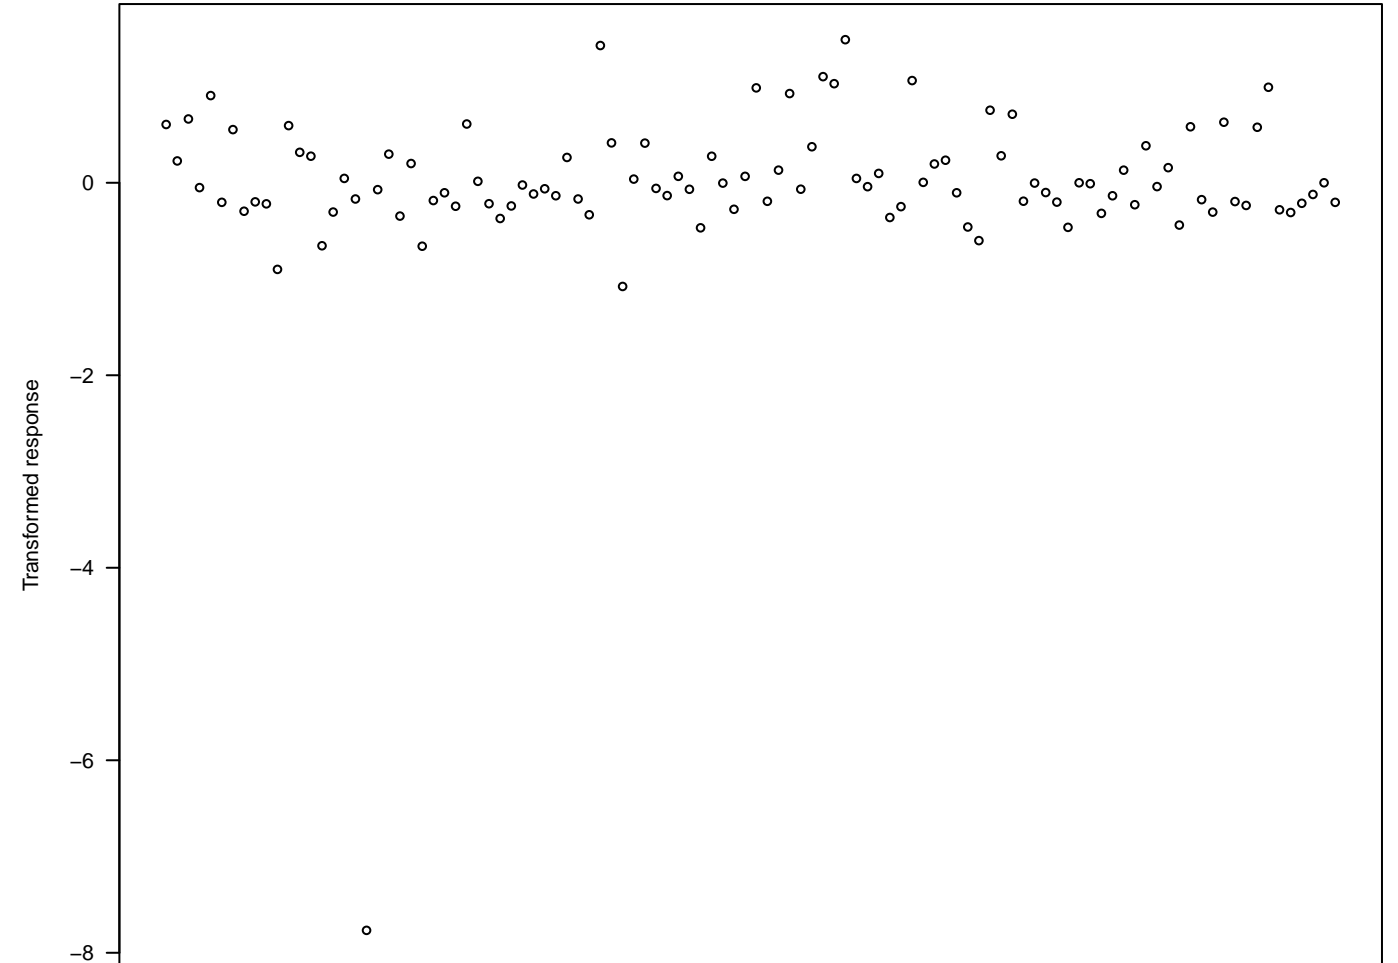

Glucose  
(Fasted Clinical Chemistry)

HMGU

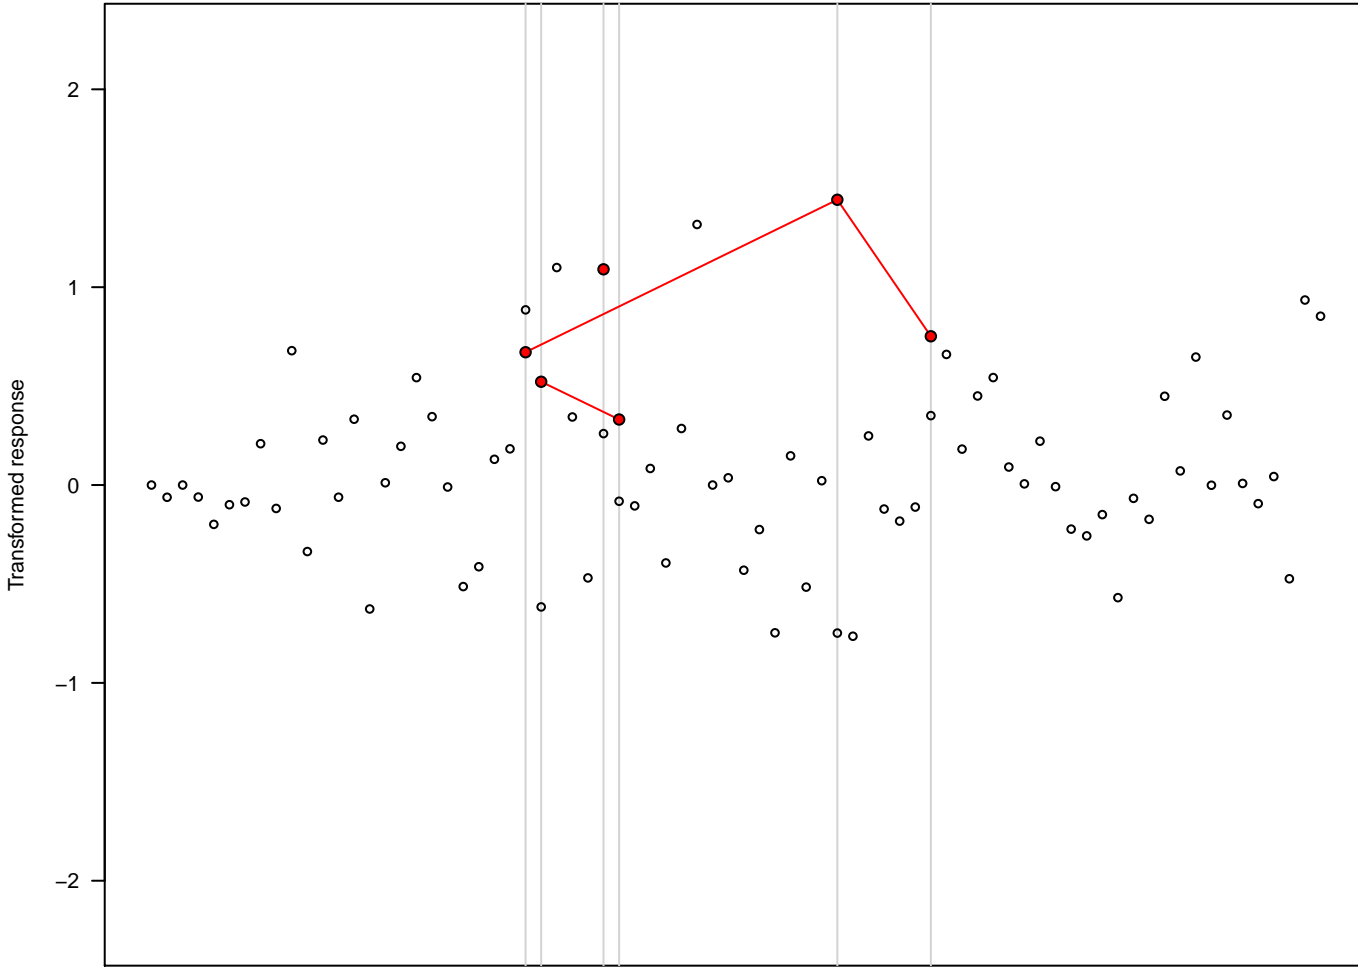

MRC Harwell

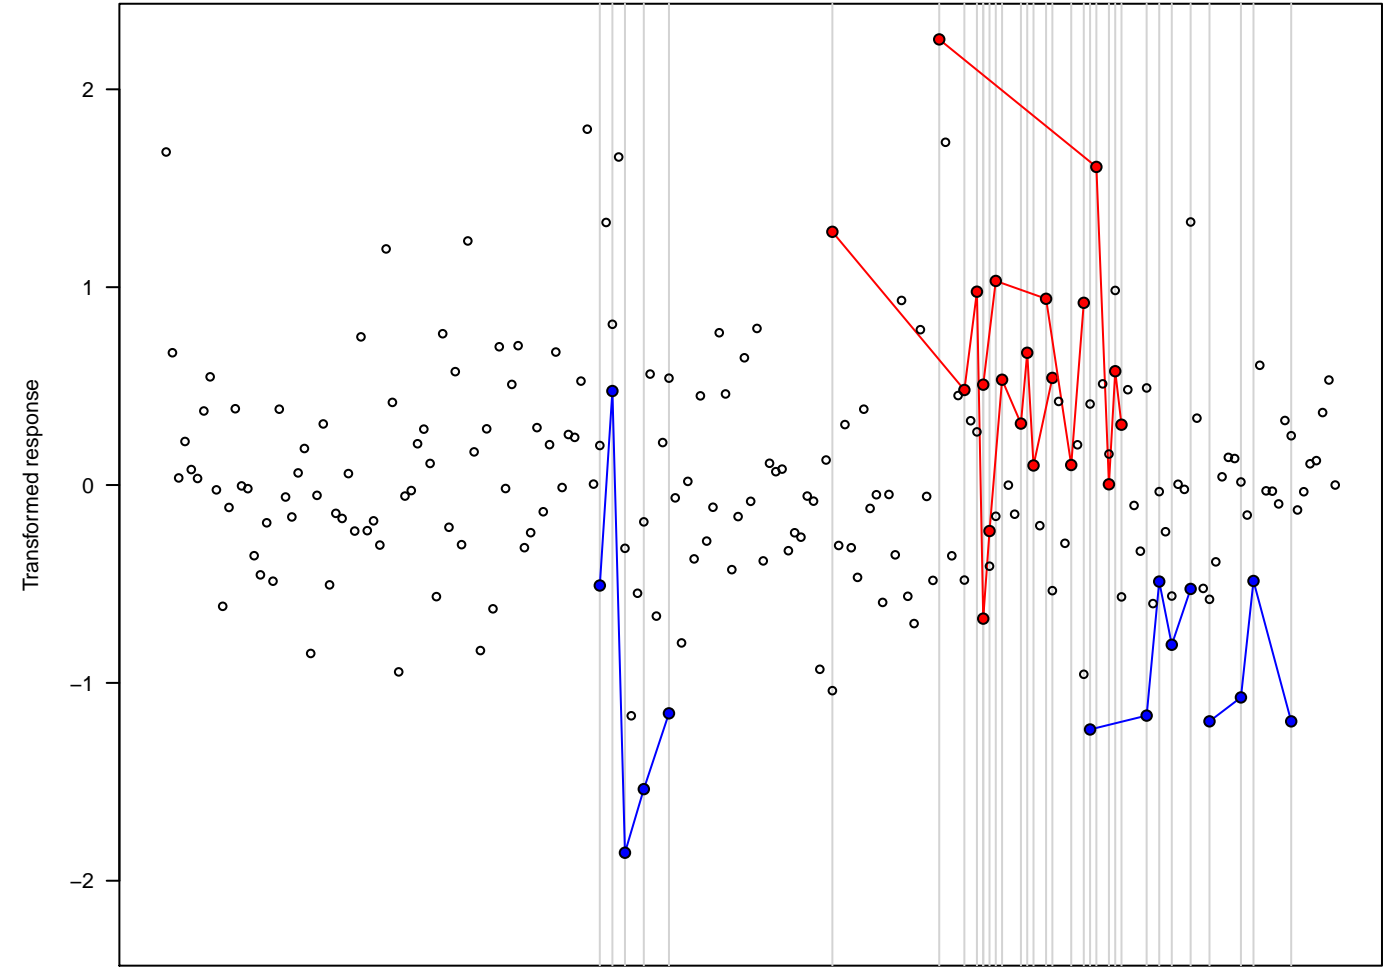

WTSI

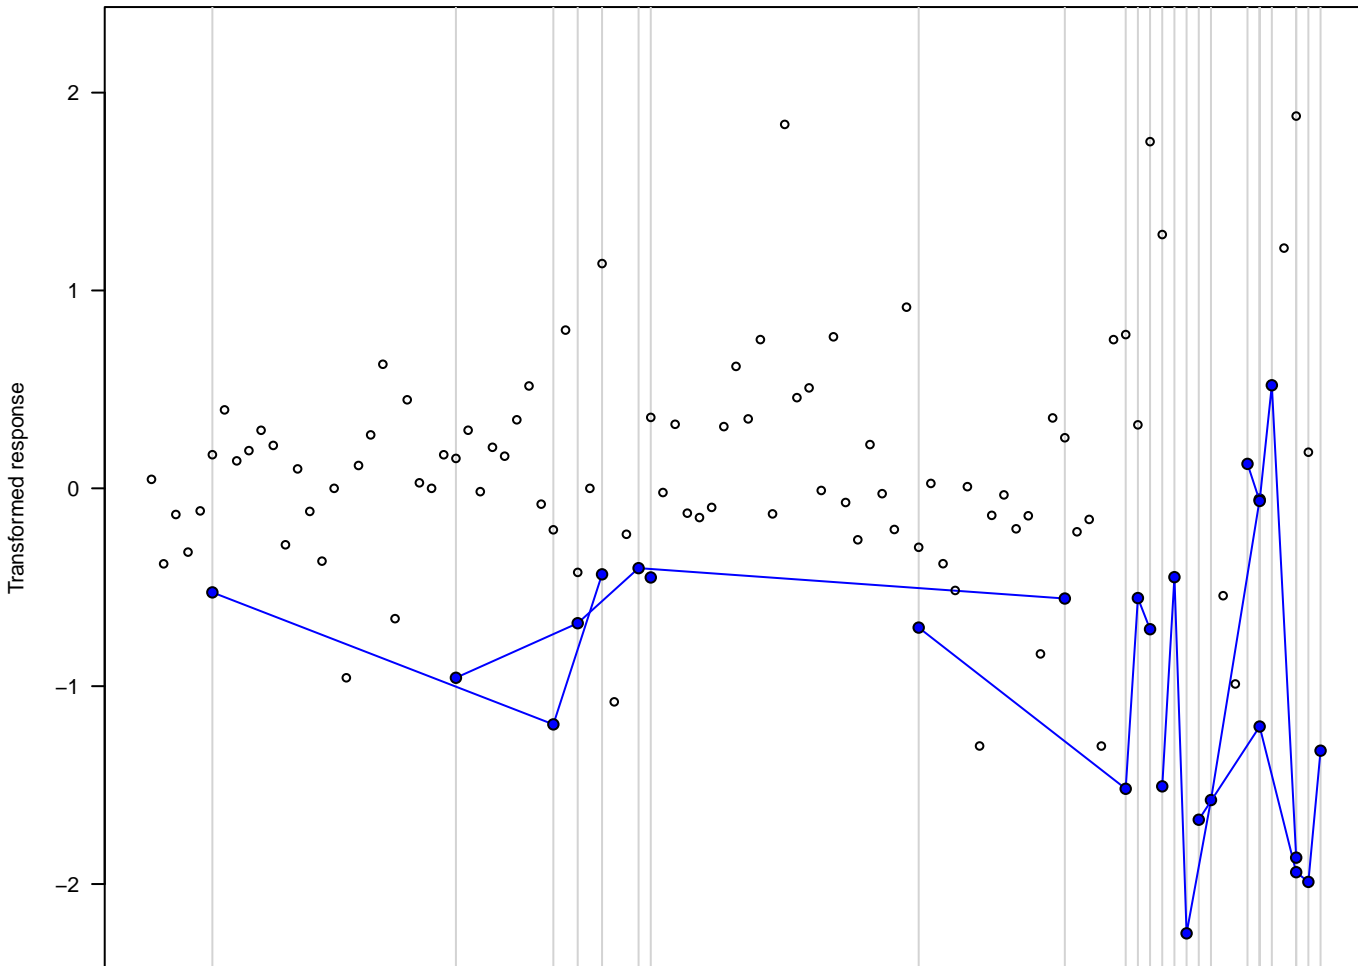

ICS

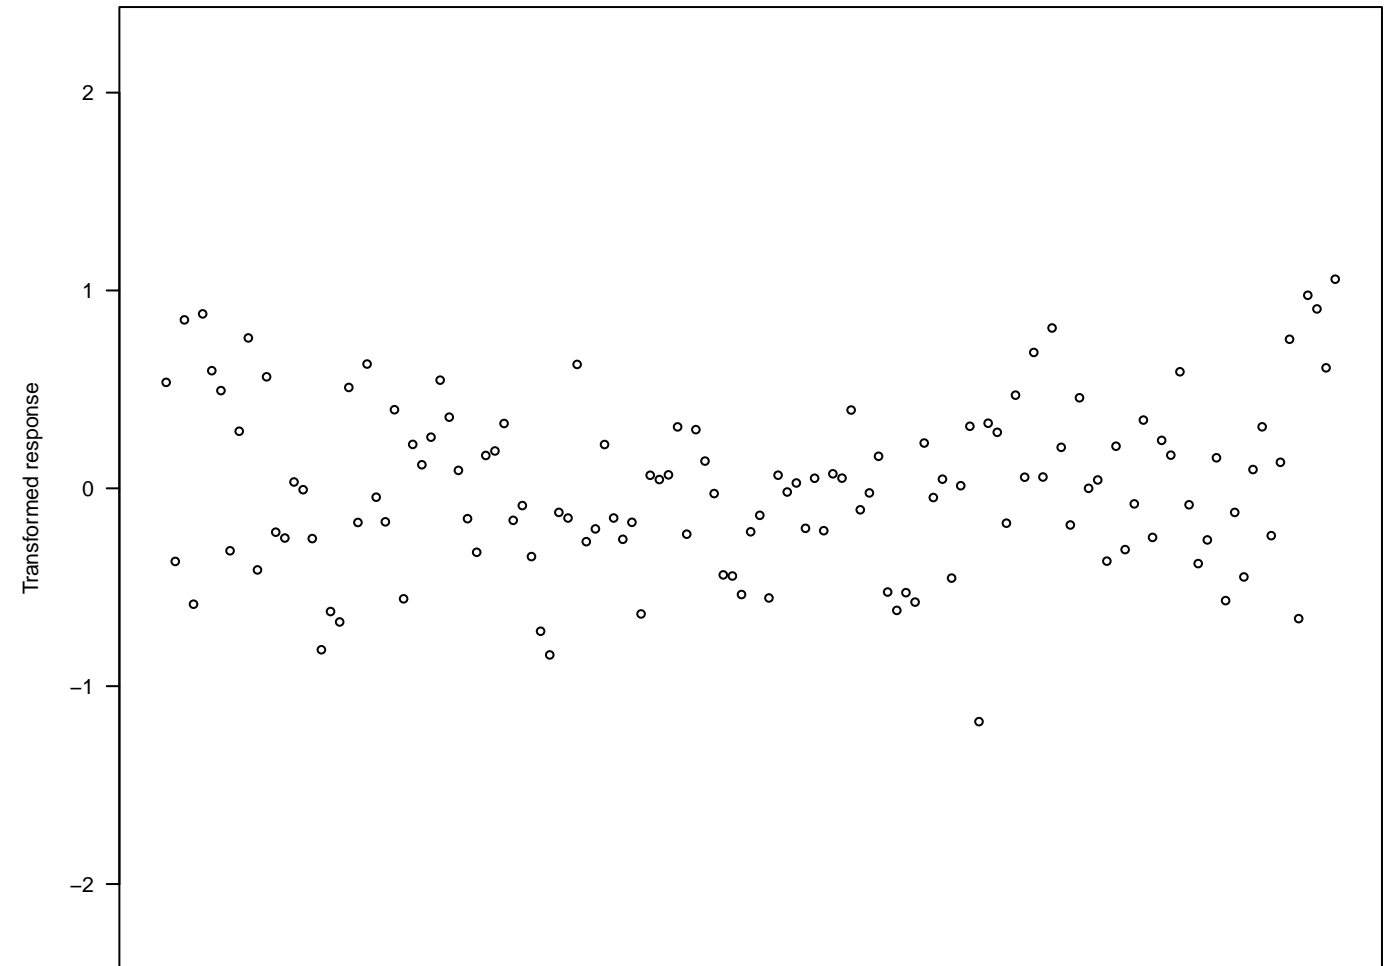

Total cholesterol  
(Fasted Clinical Chemistry)

HMGU

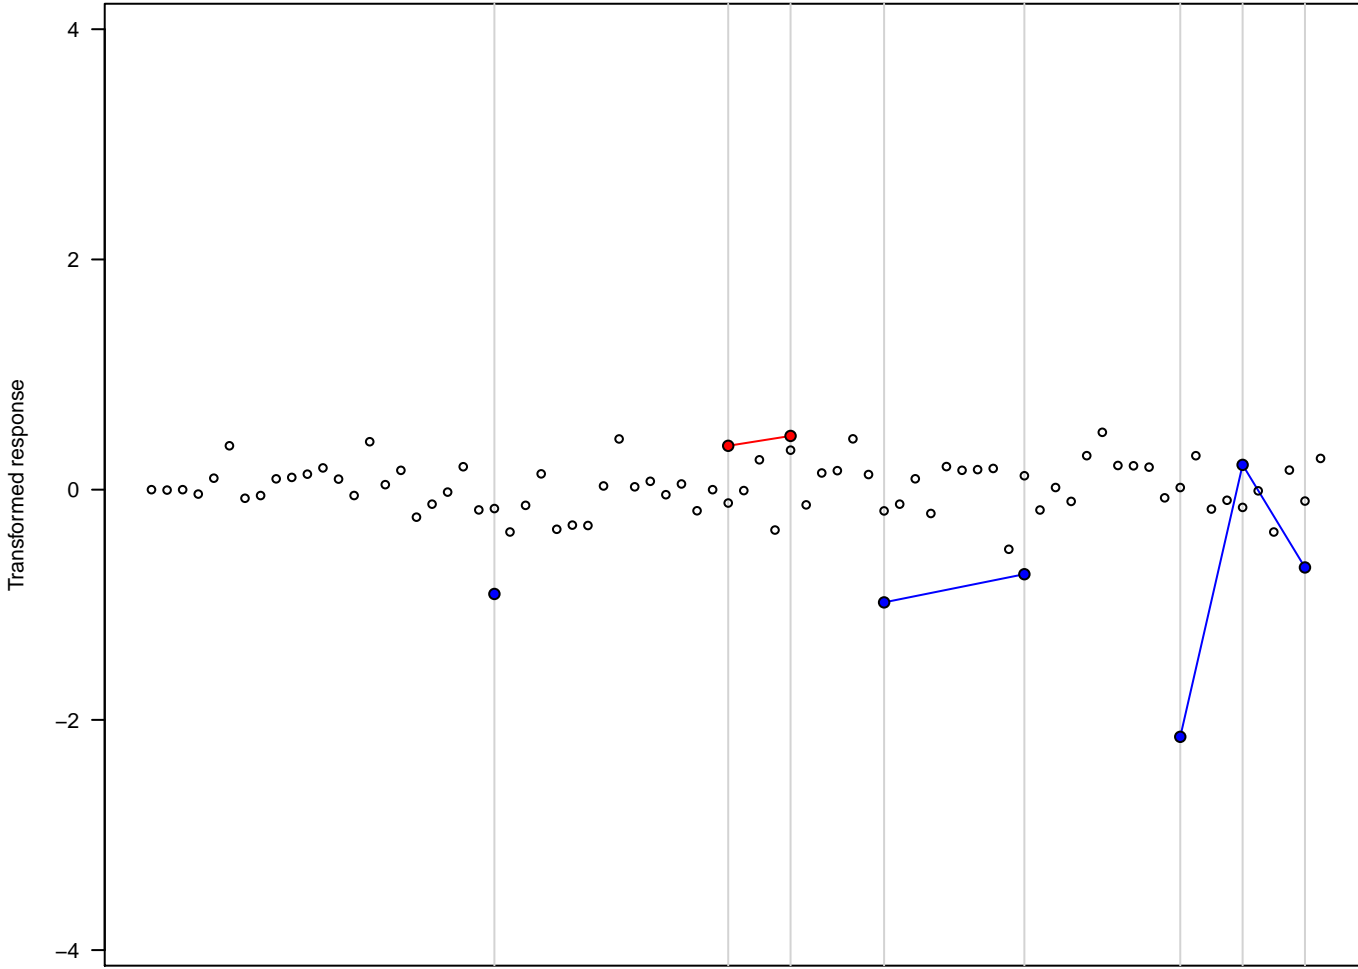

MRC Harwell

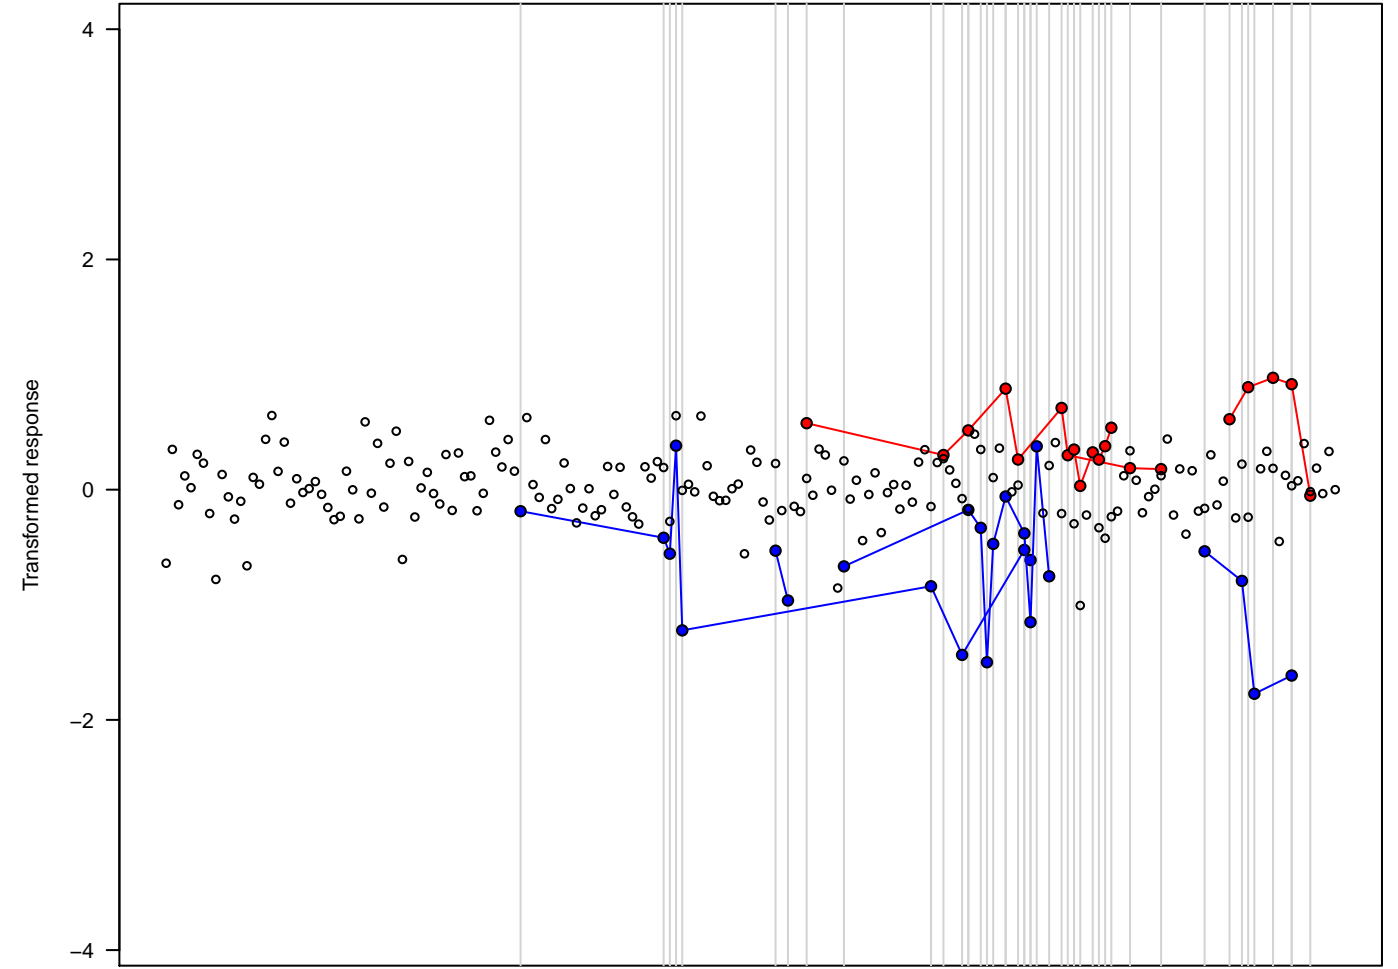

WTSI

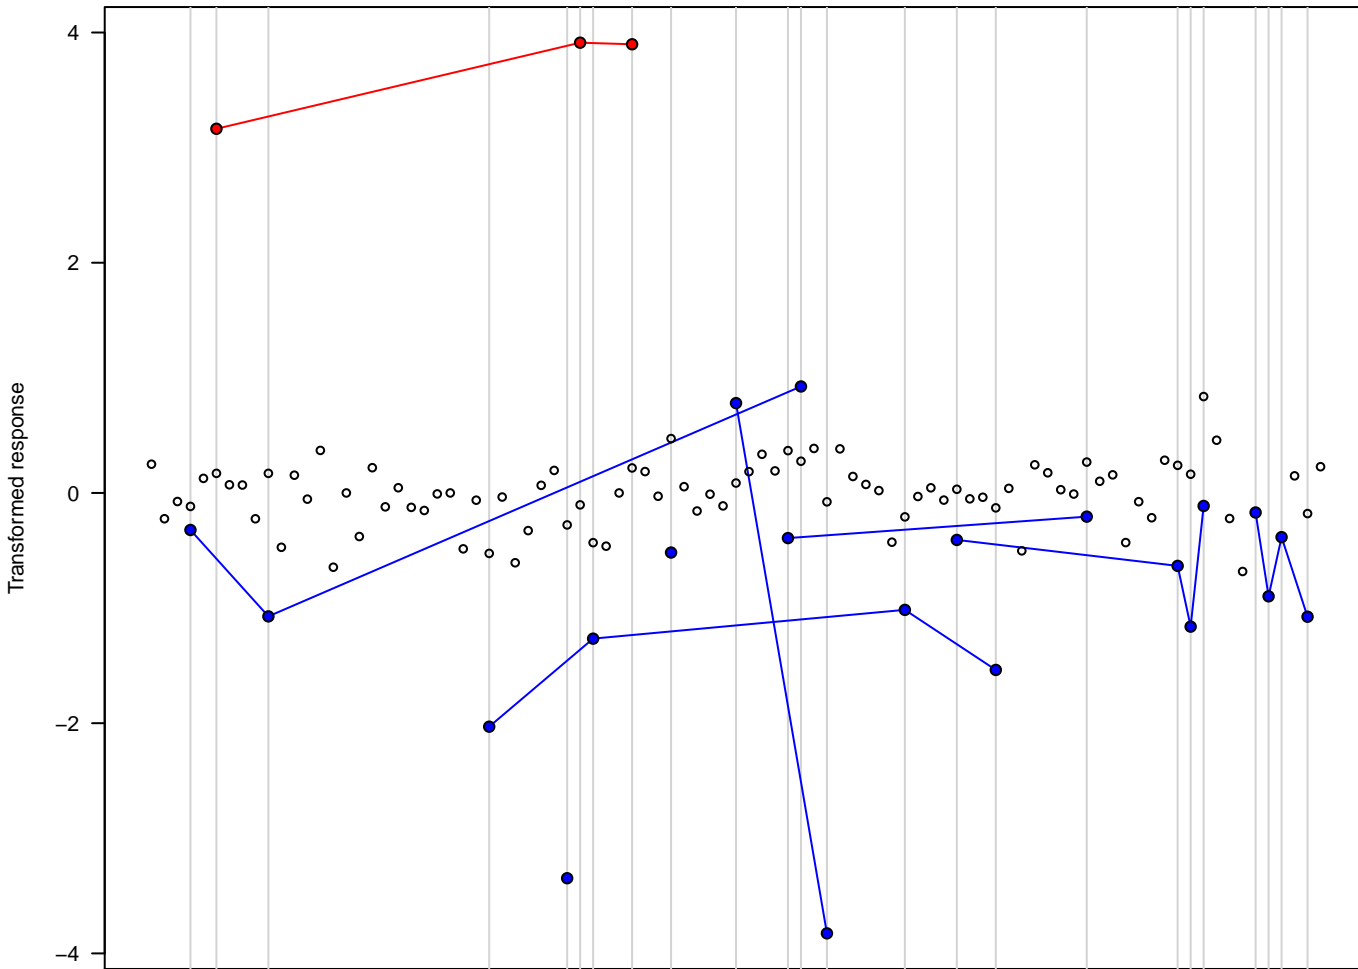

ICS

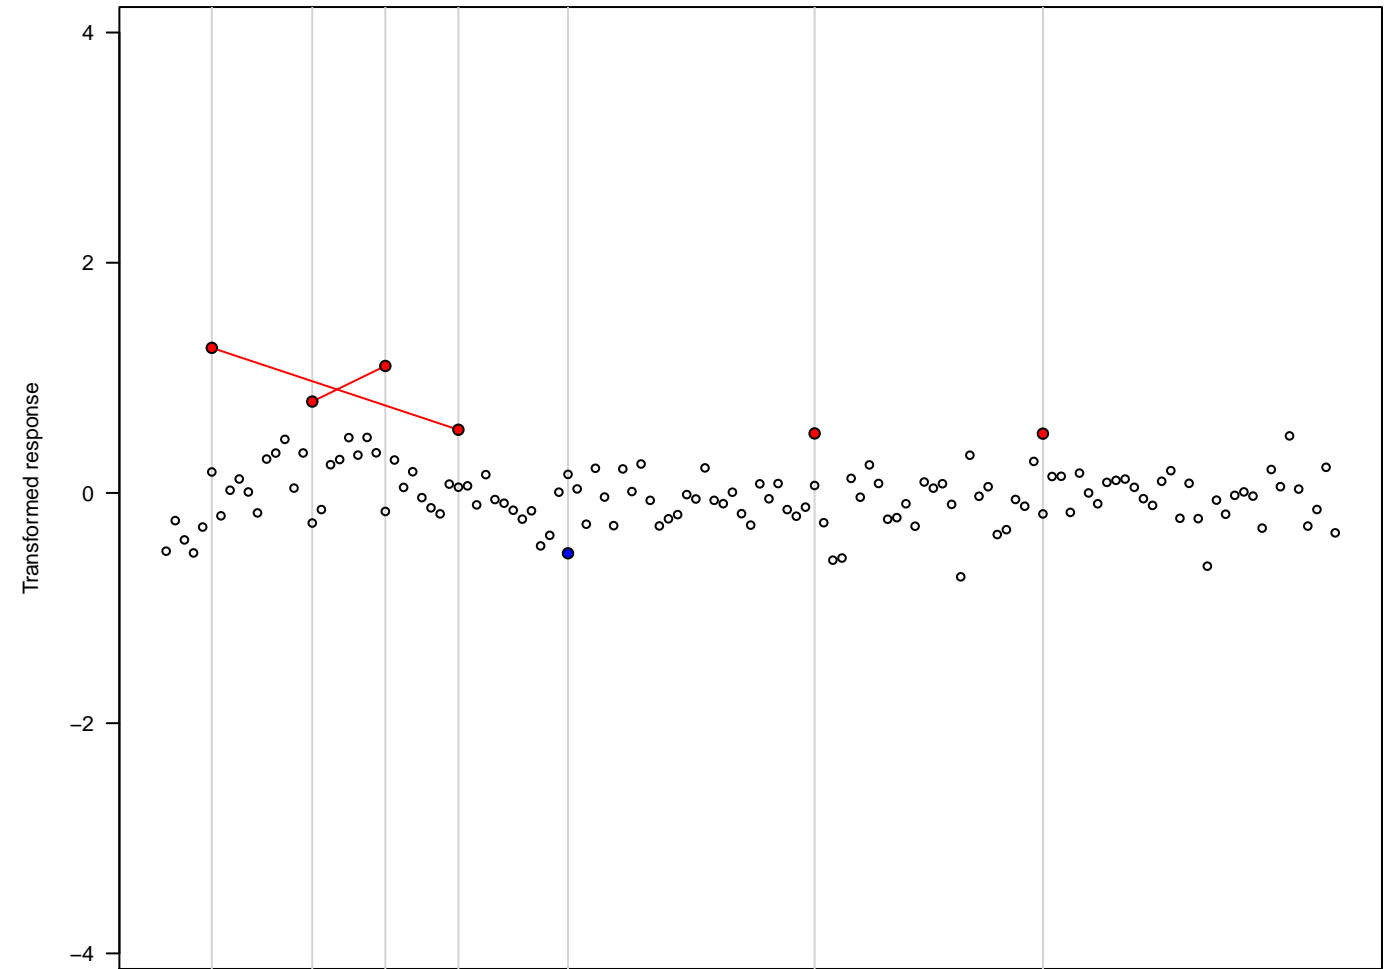

Triglycerides  
(Fasted Clinical Chemistry)

HMGU

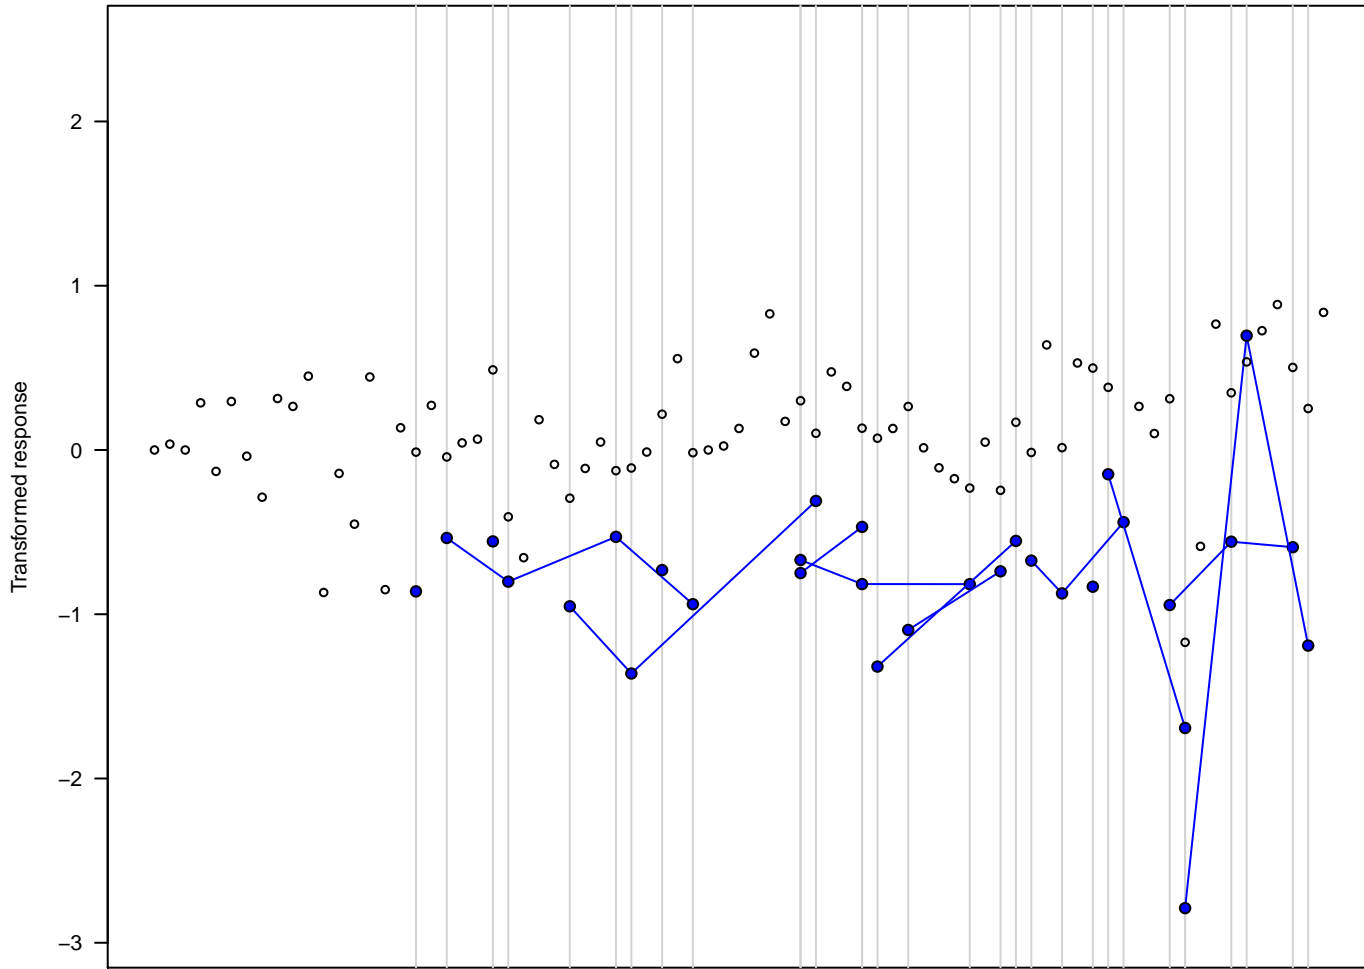

MRC Harwell

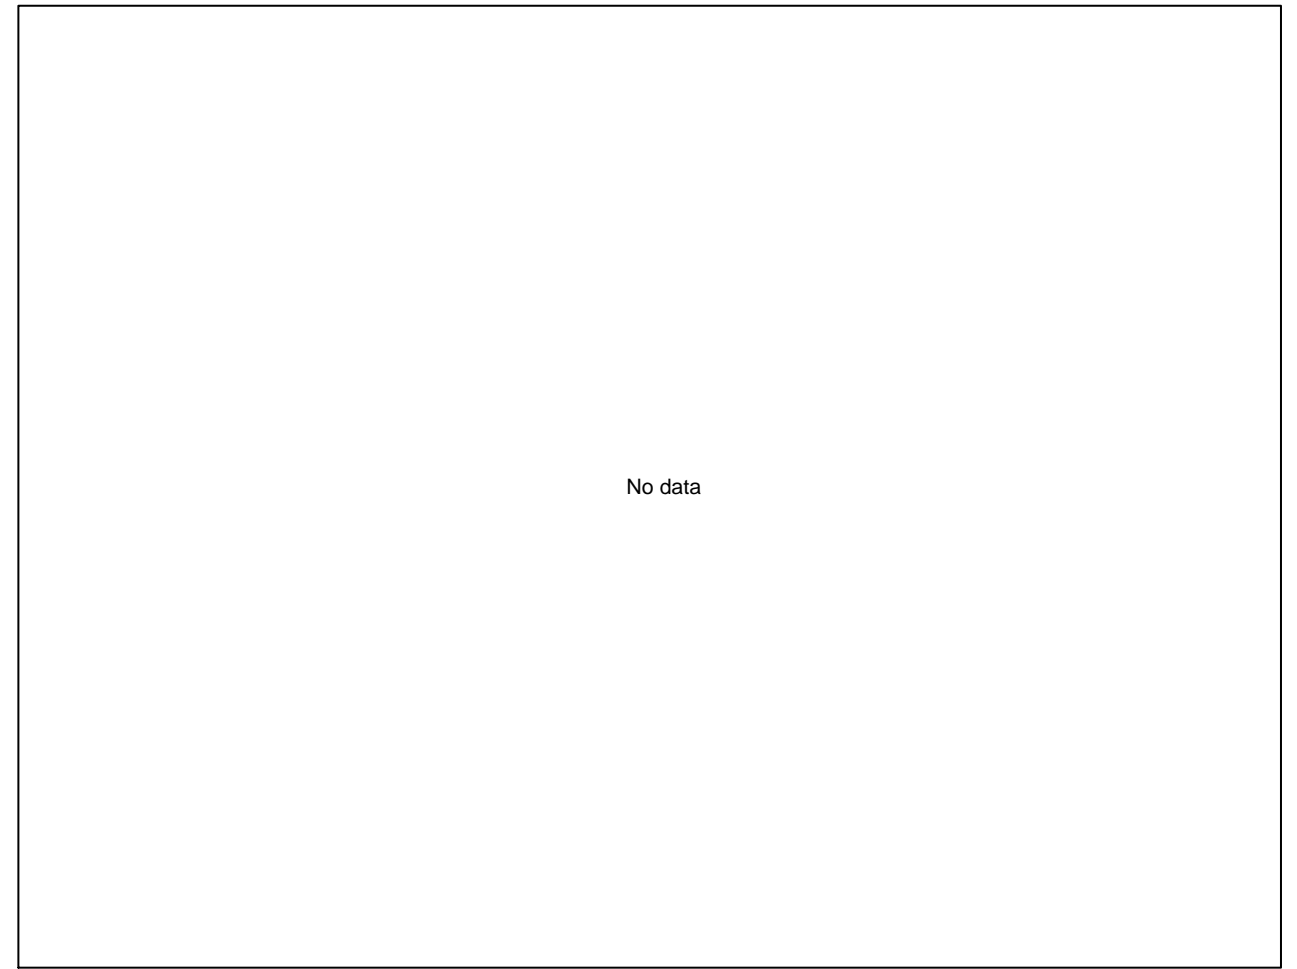

WTSI

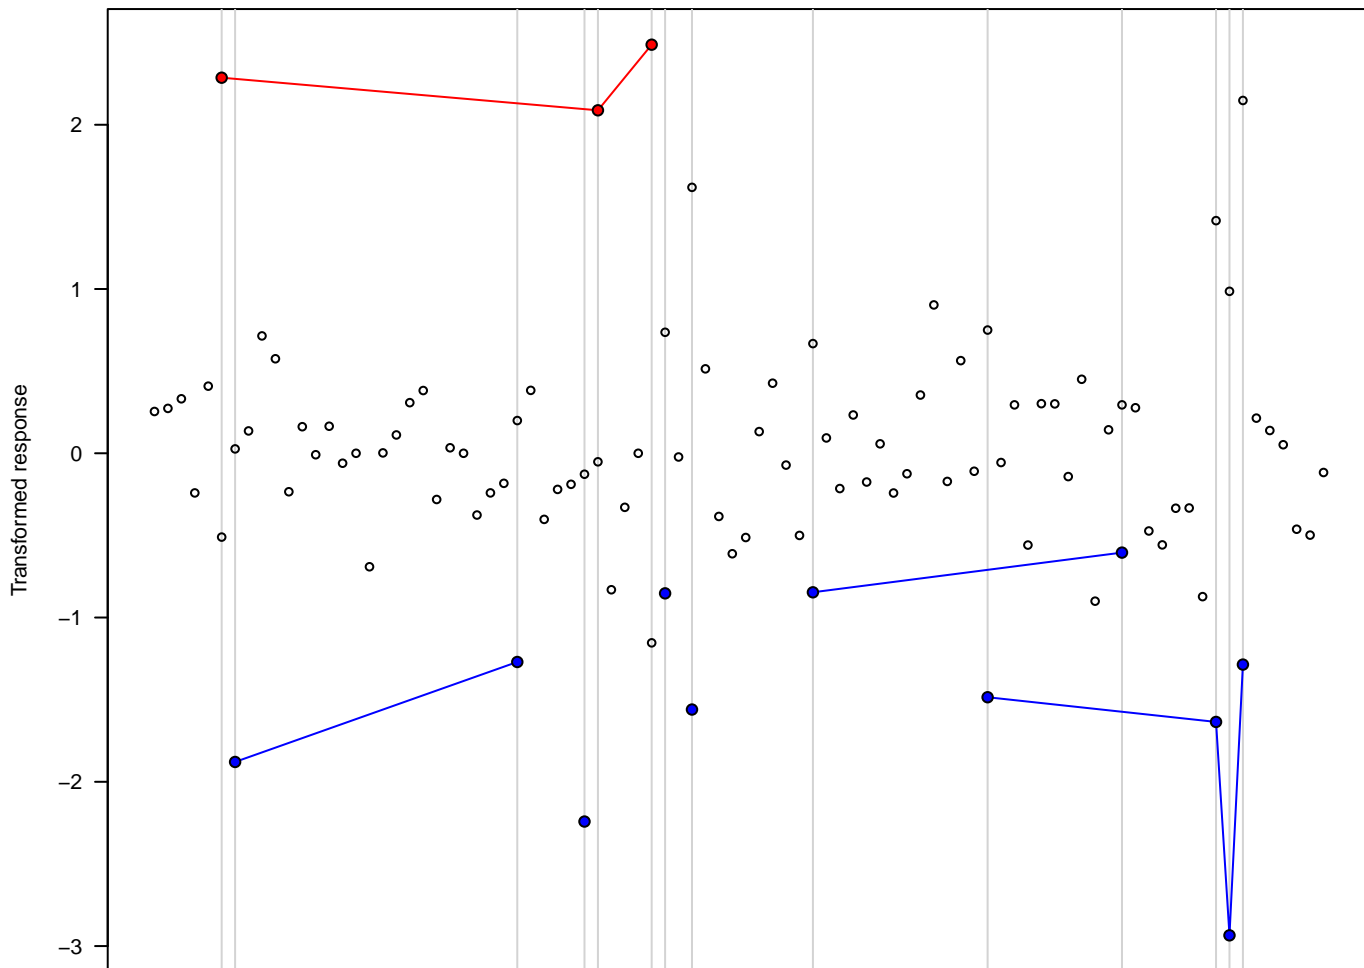

ICS

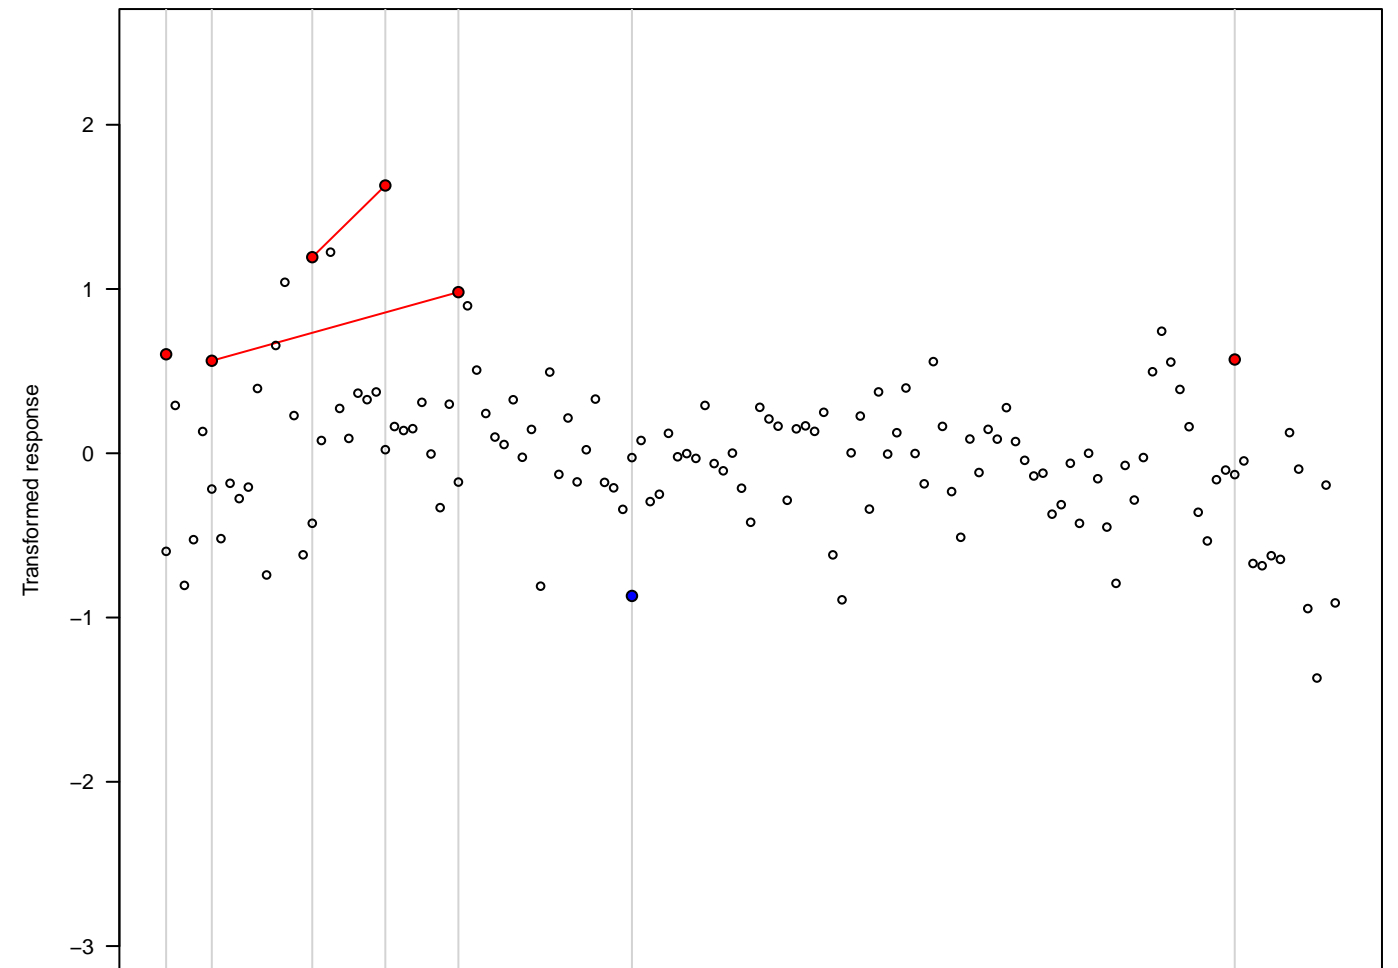

Free fatty acids  
(Fasted Clinical Chemistry)

HMGU

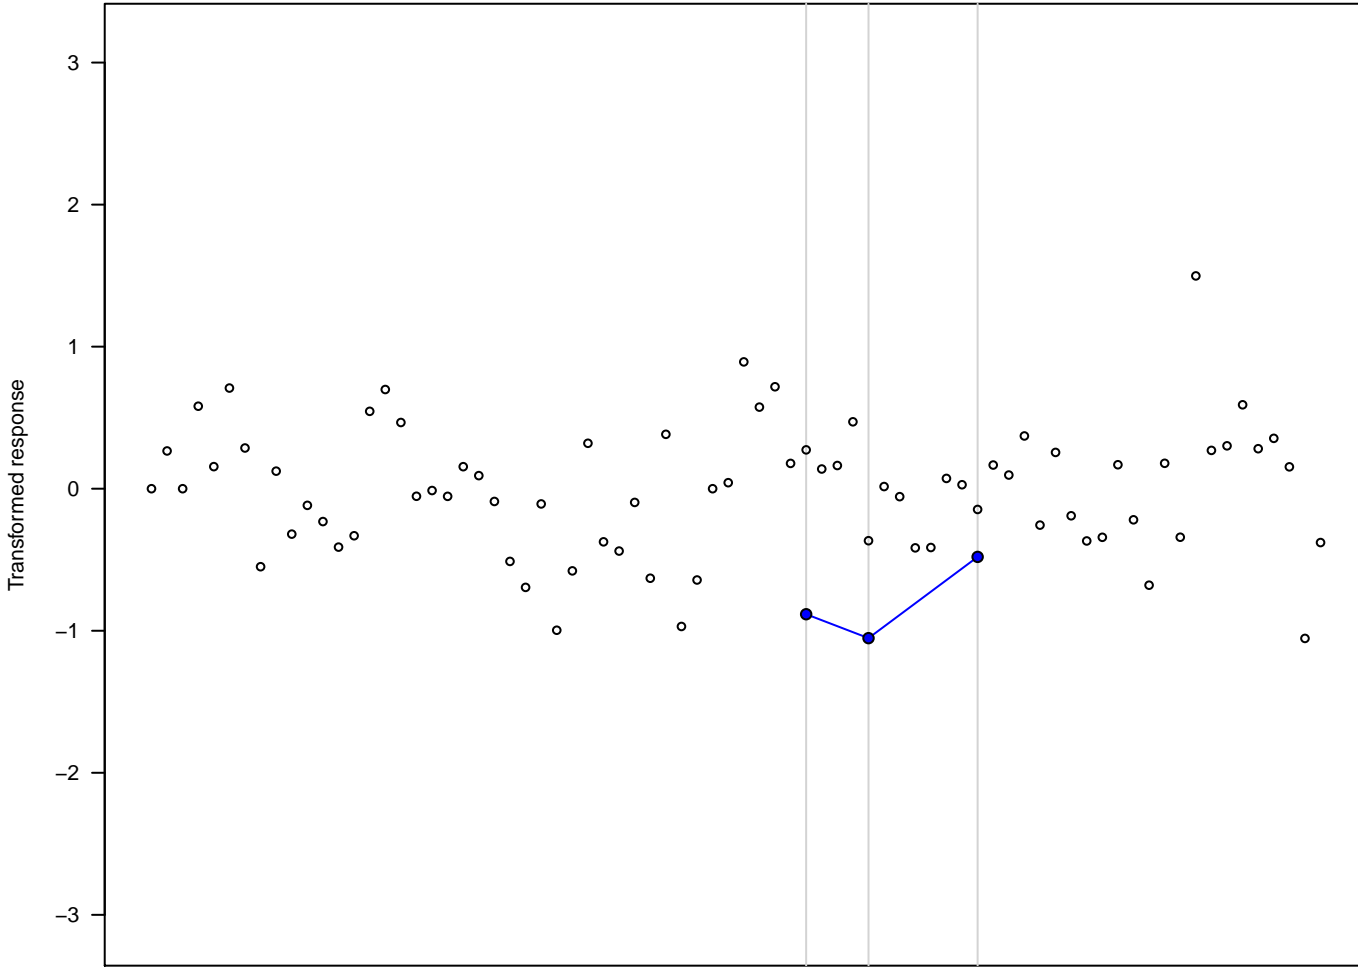

MRC Harwell

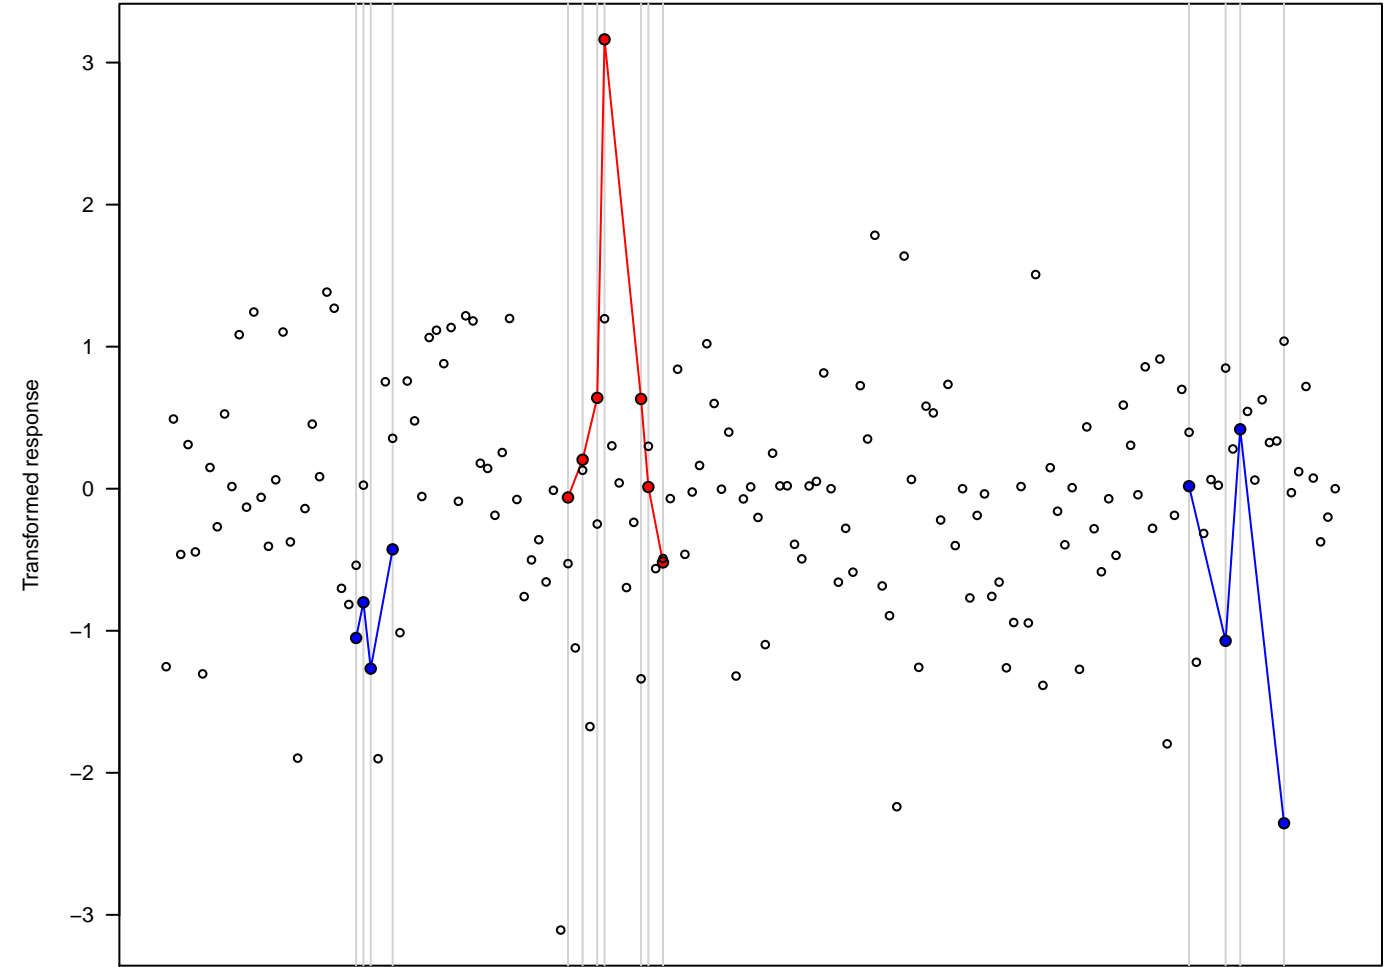

WTSI

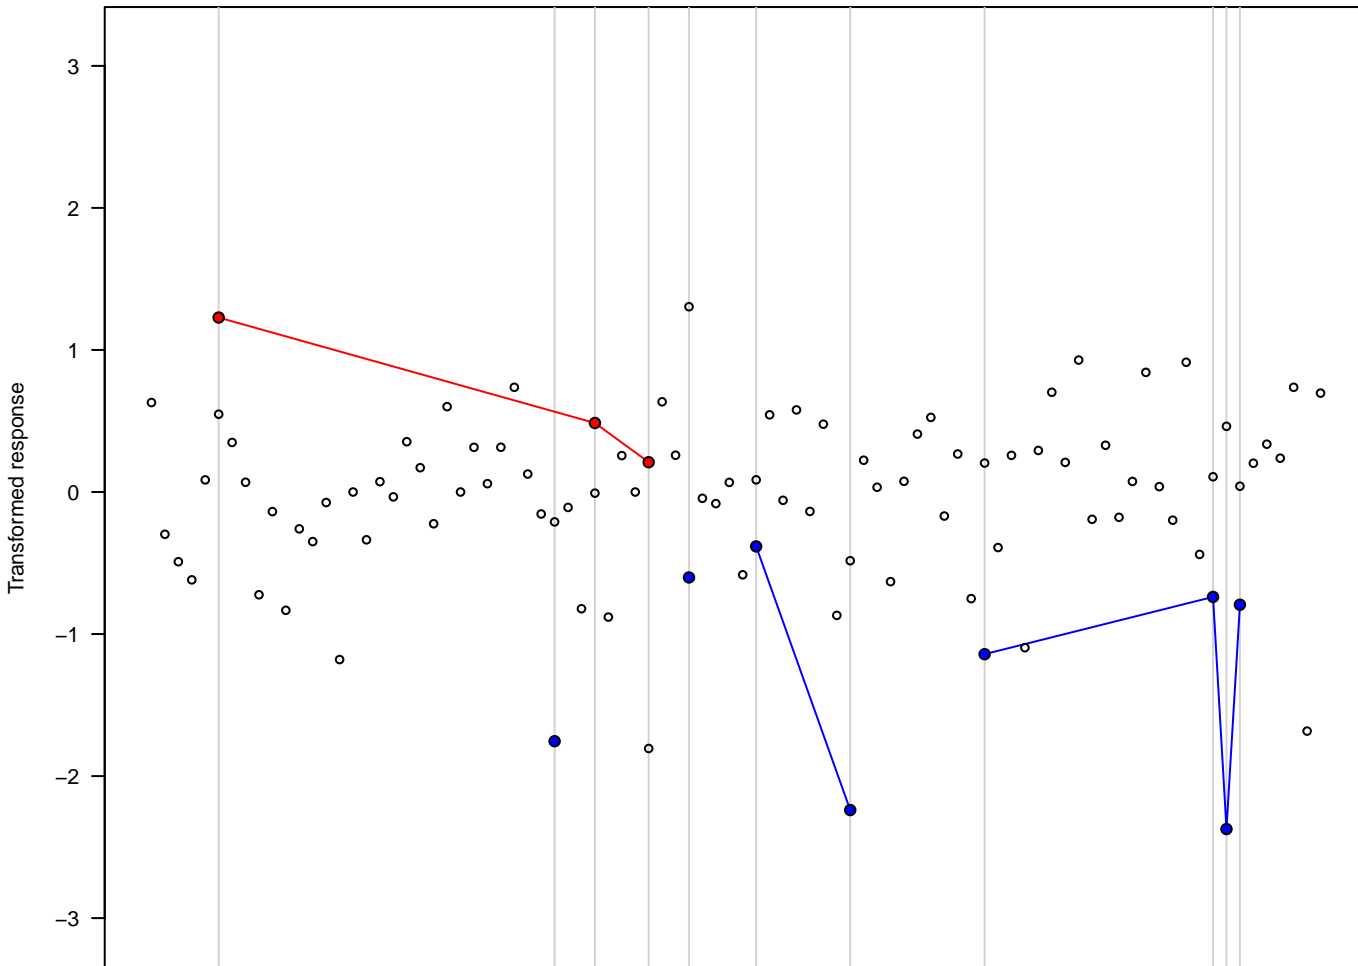

ICS

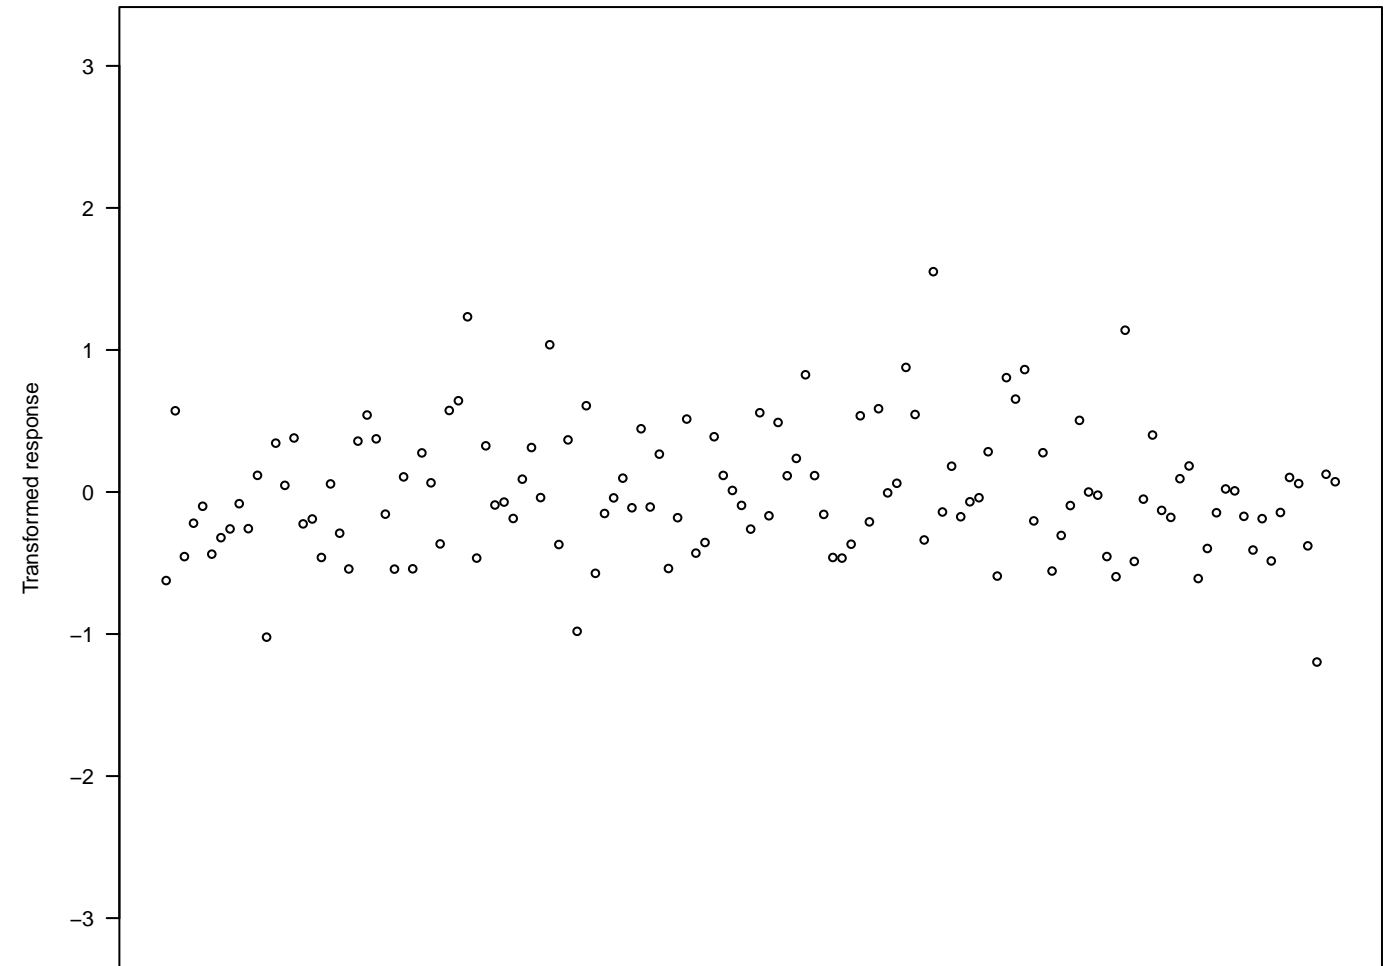

HDL-cholesterol  
(Fasted Clinical Chemistry)

HMGU

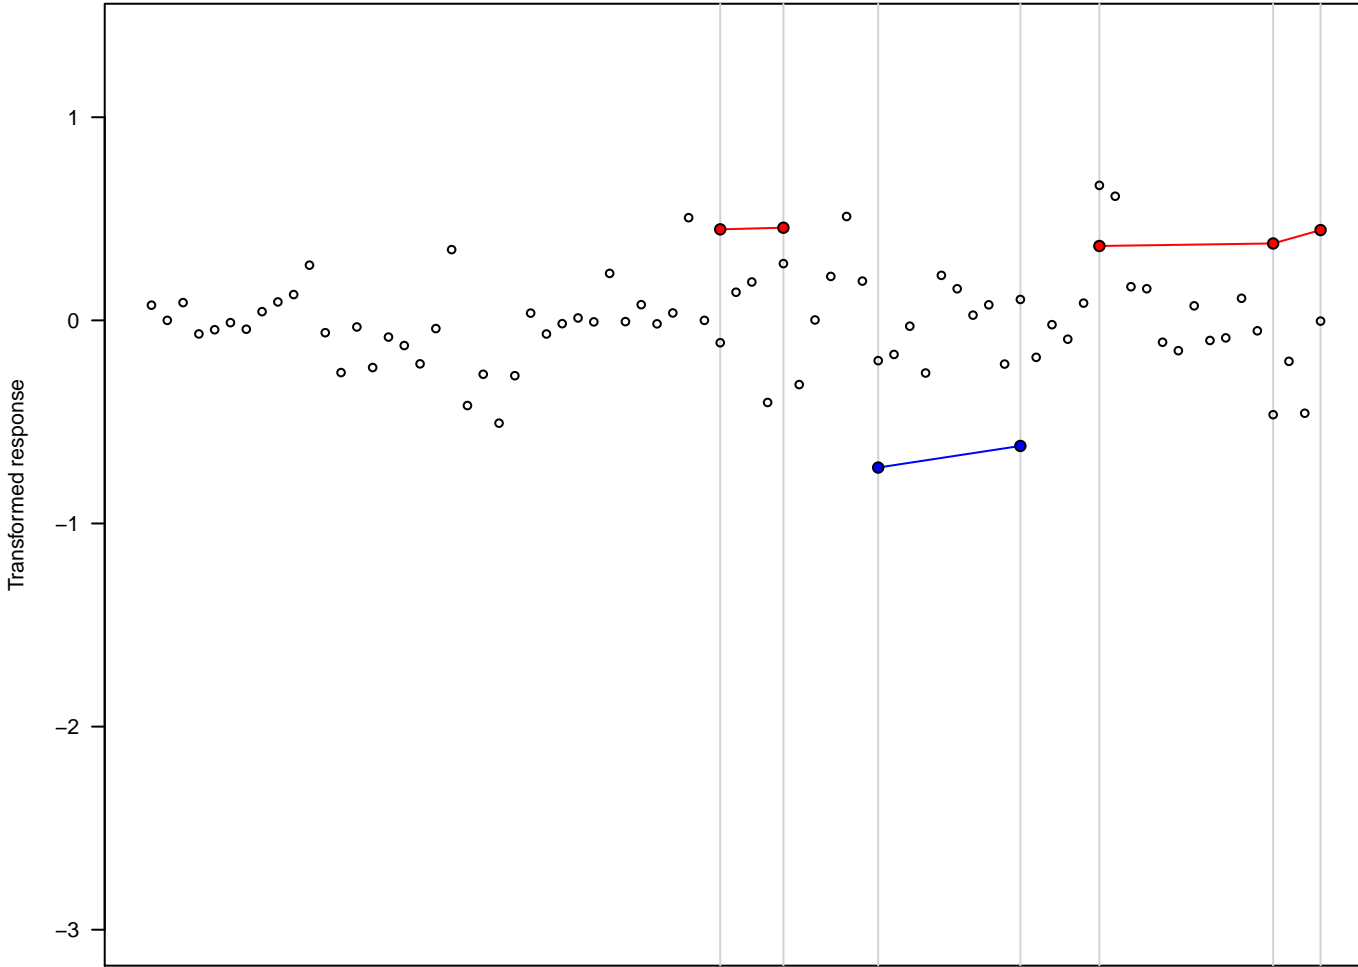

MRC Harwell

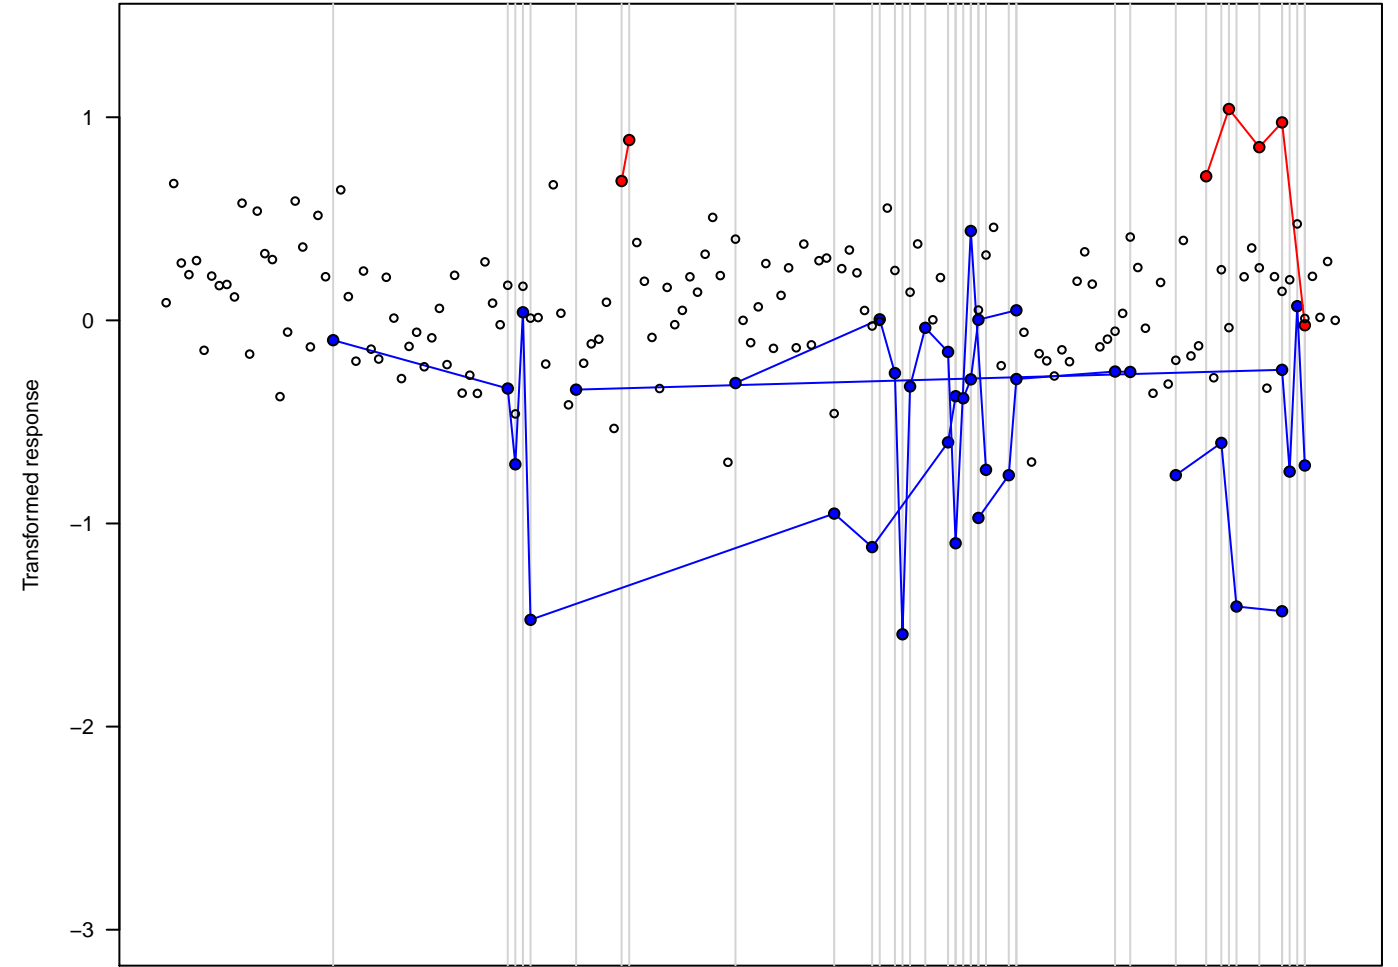

WTSI

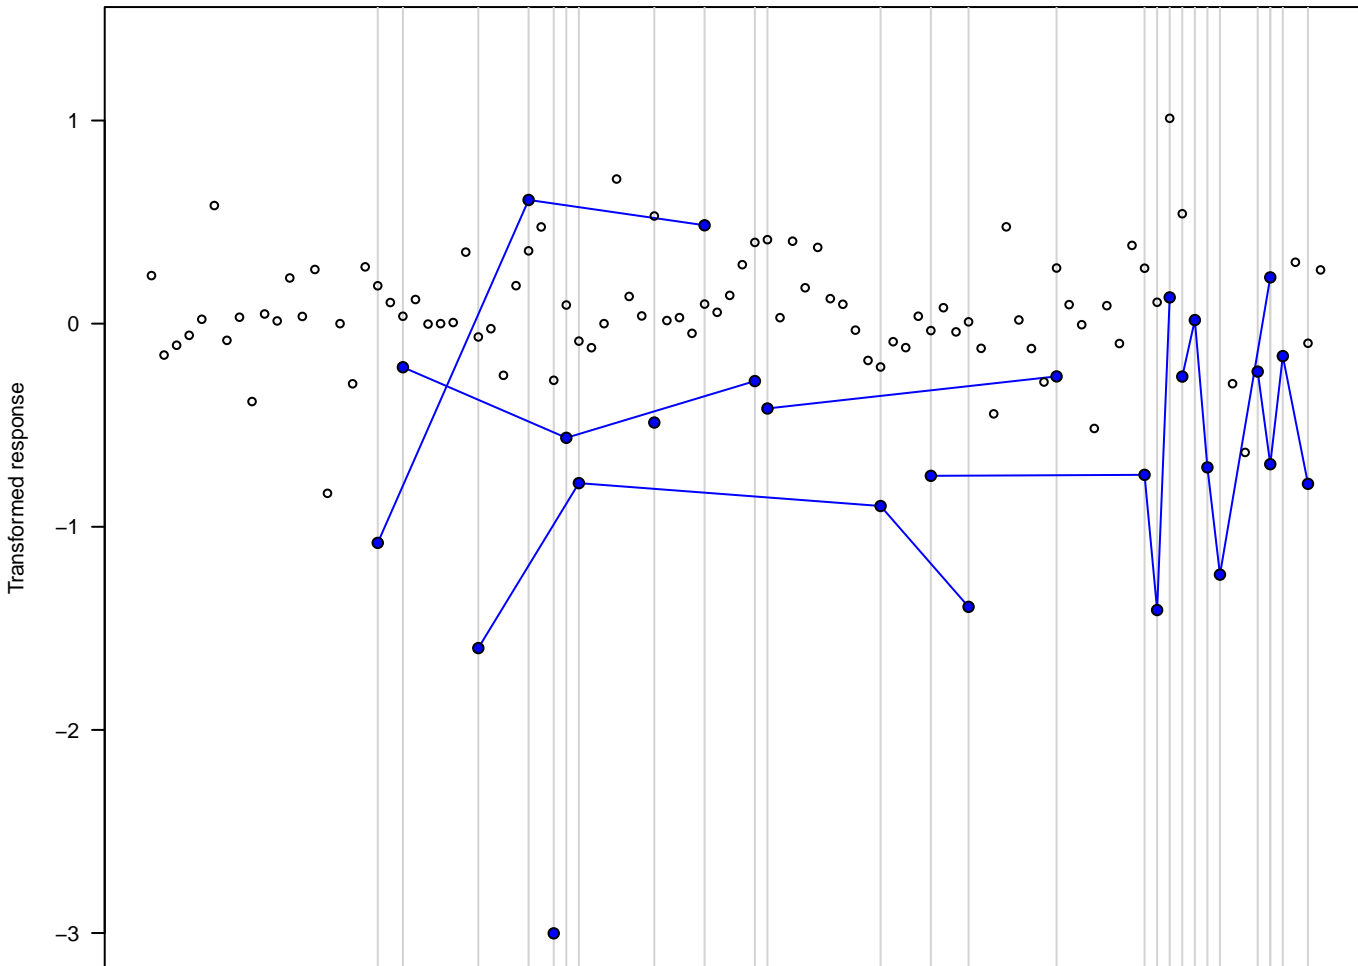

ICS

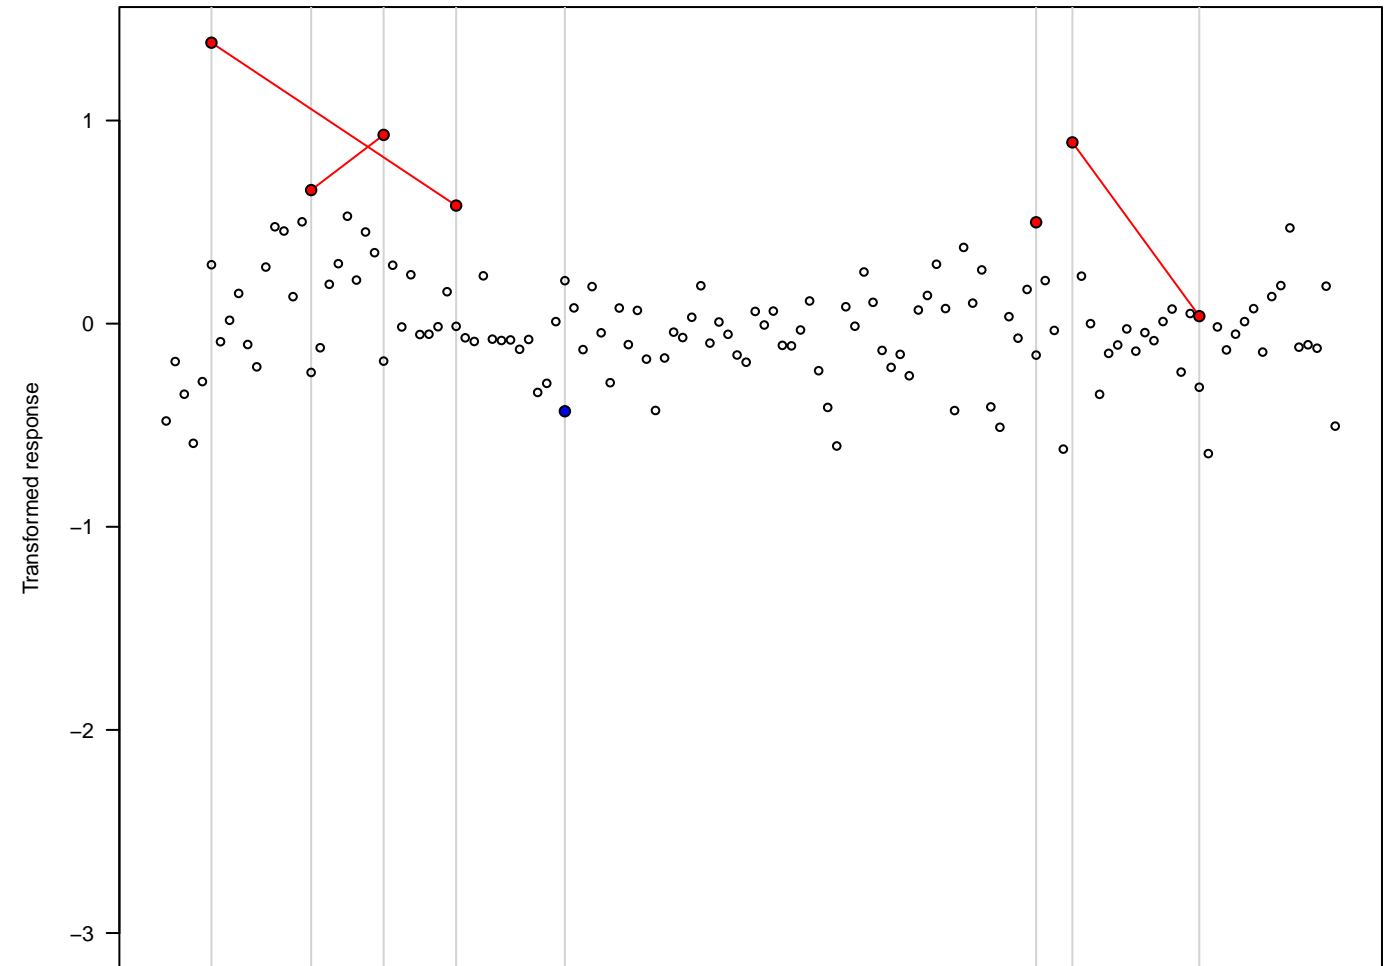

LDL-cholesterol  
(Fasted Clinical Chemistry)

HMGU

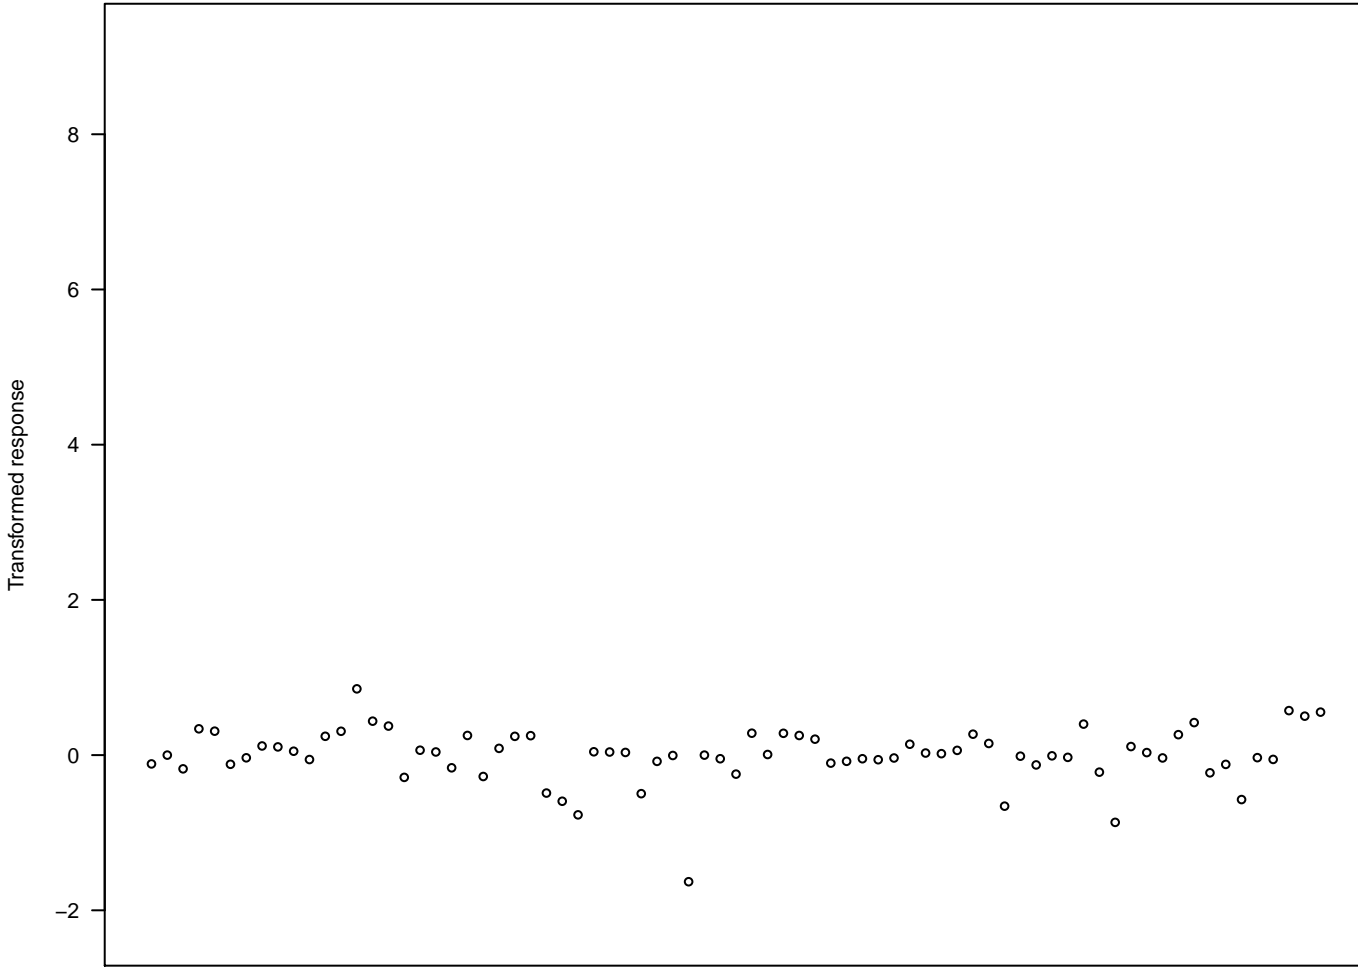

MRC Harwell

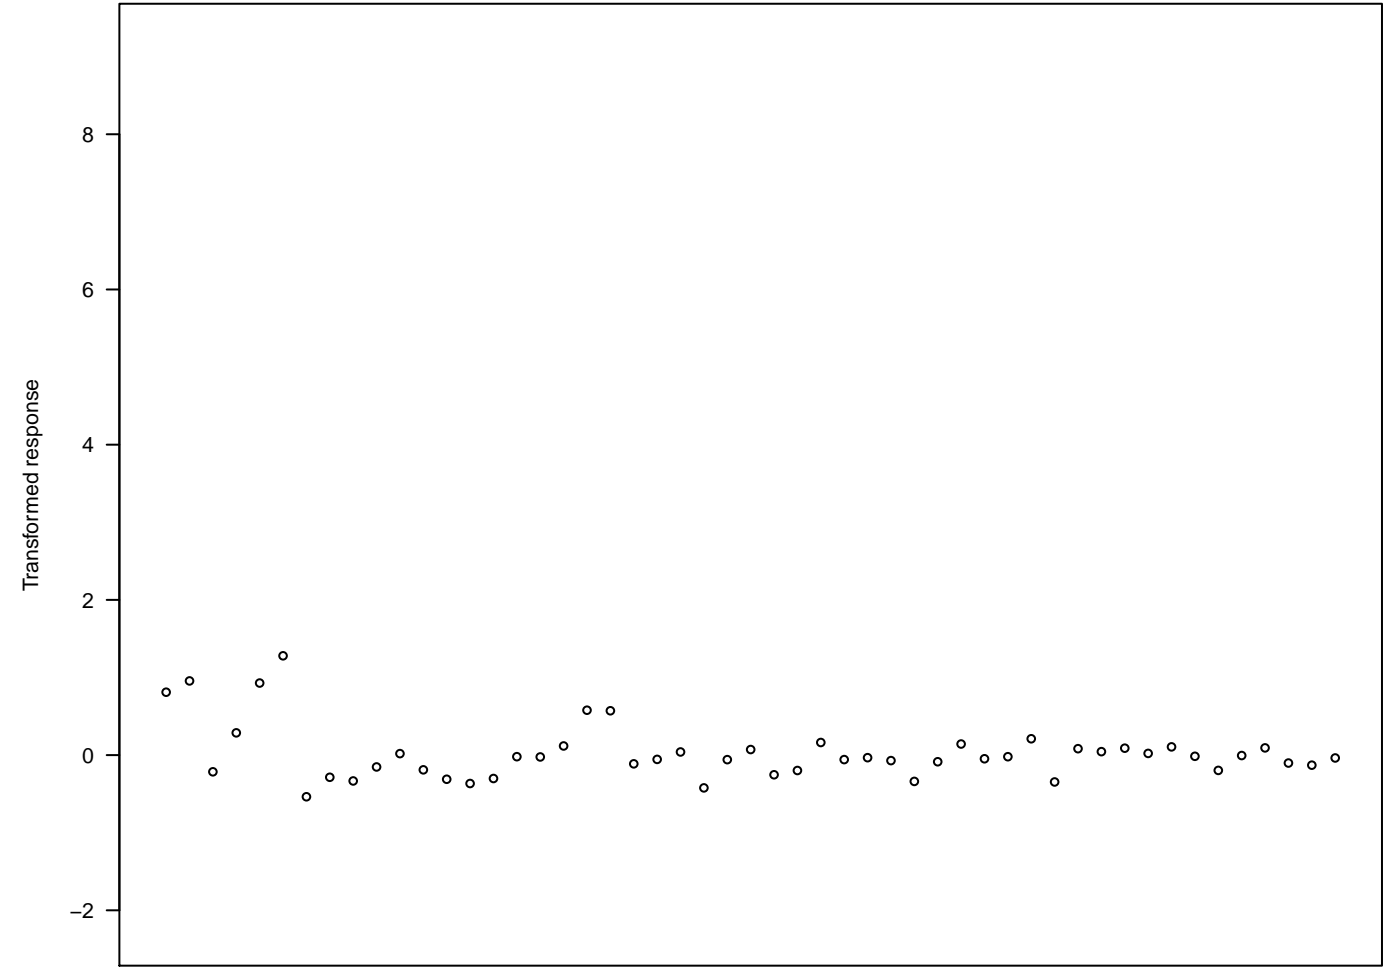

WTSI

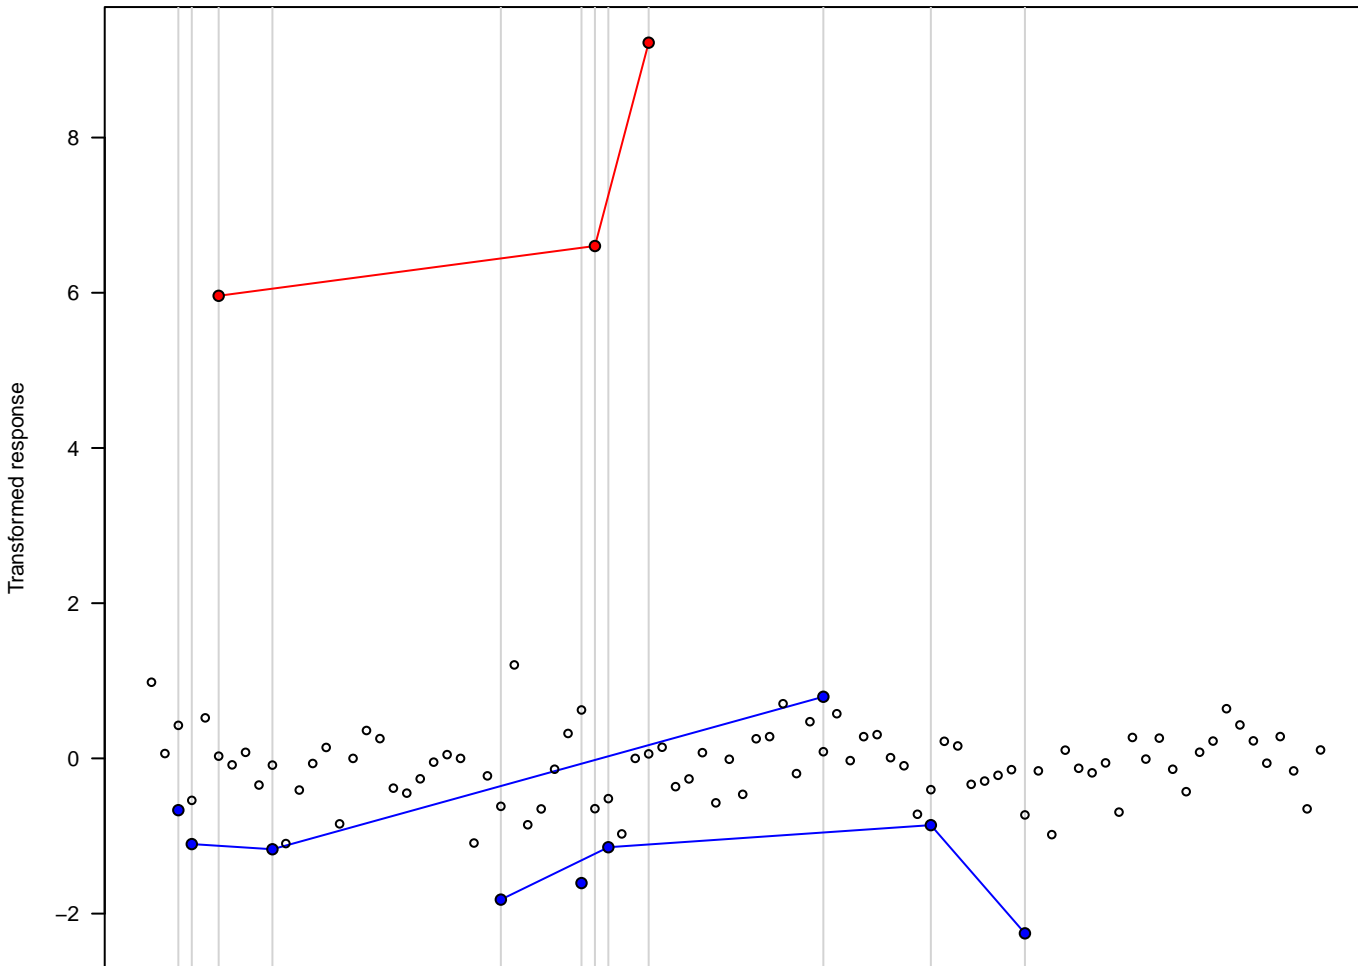

ICS

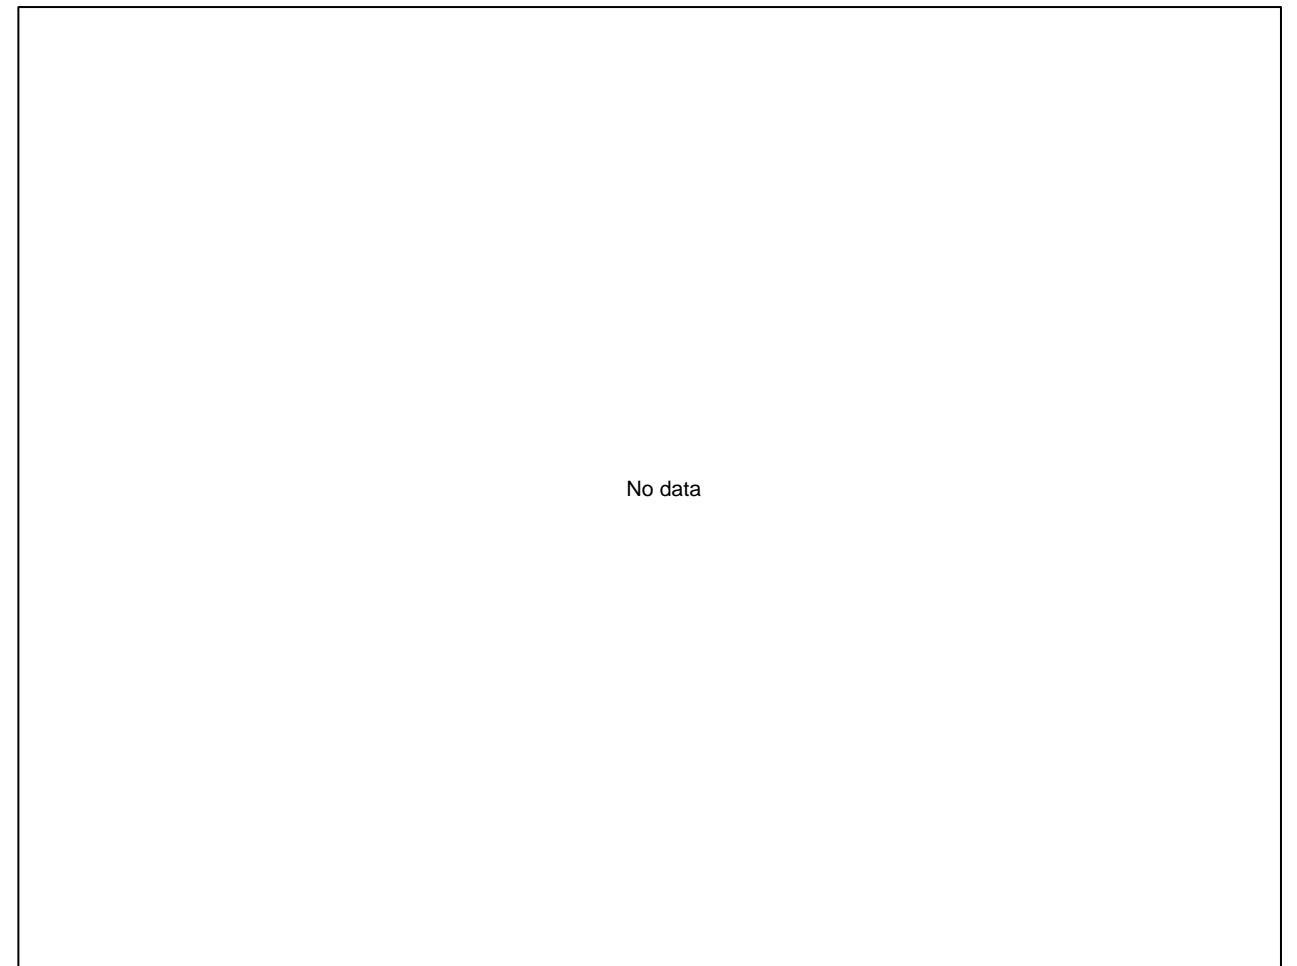



# Glycerol (Fasted Clinical Chemistry)

## HMGU

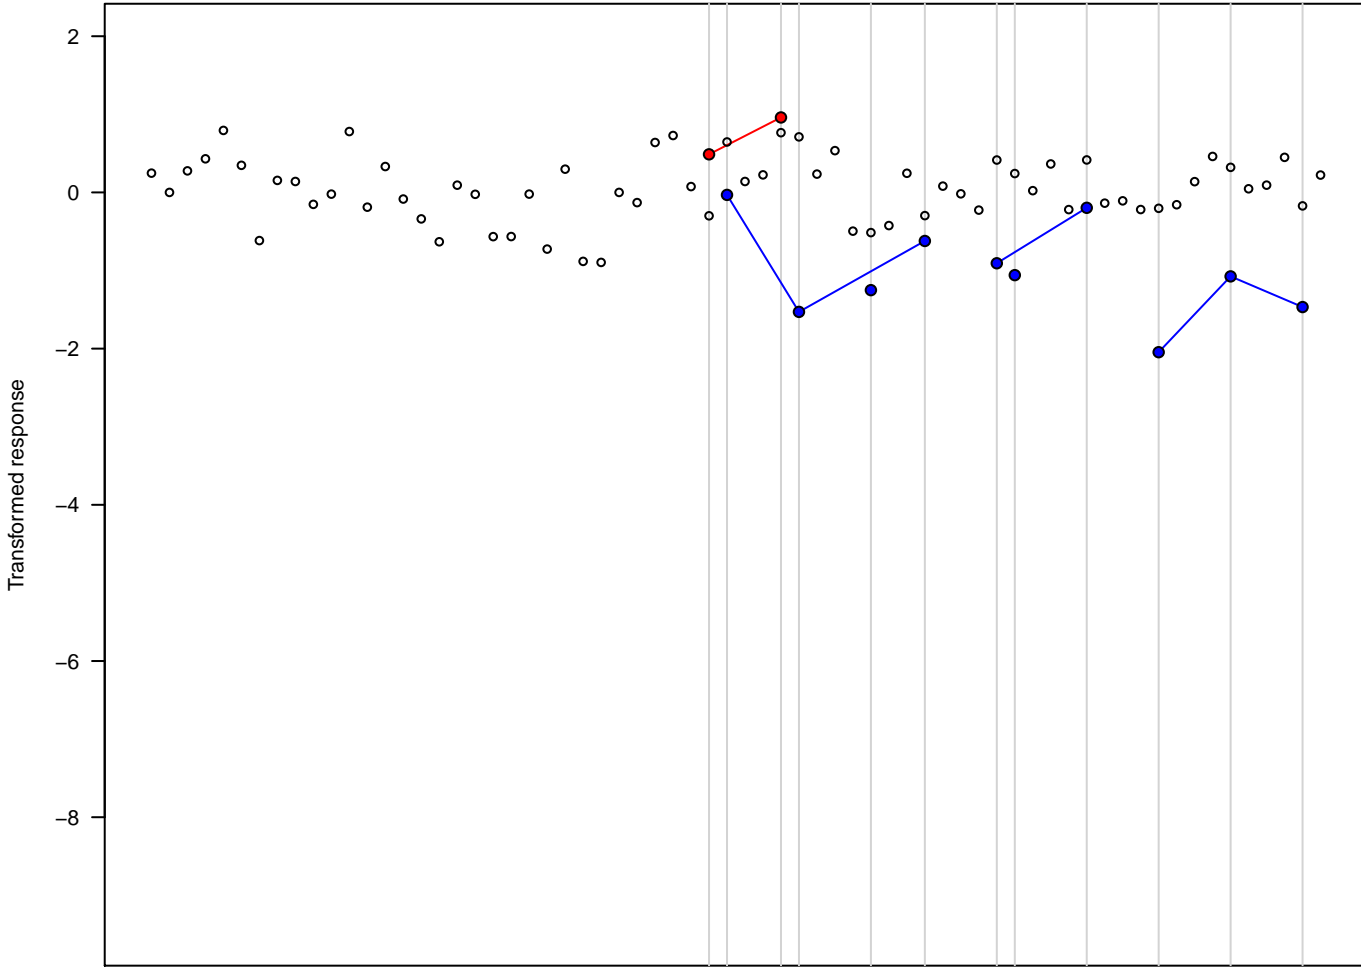

## MRC Harwell

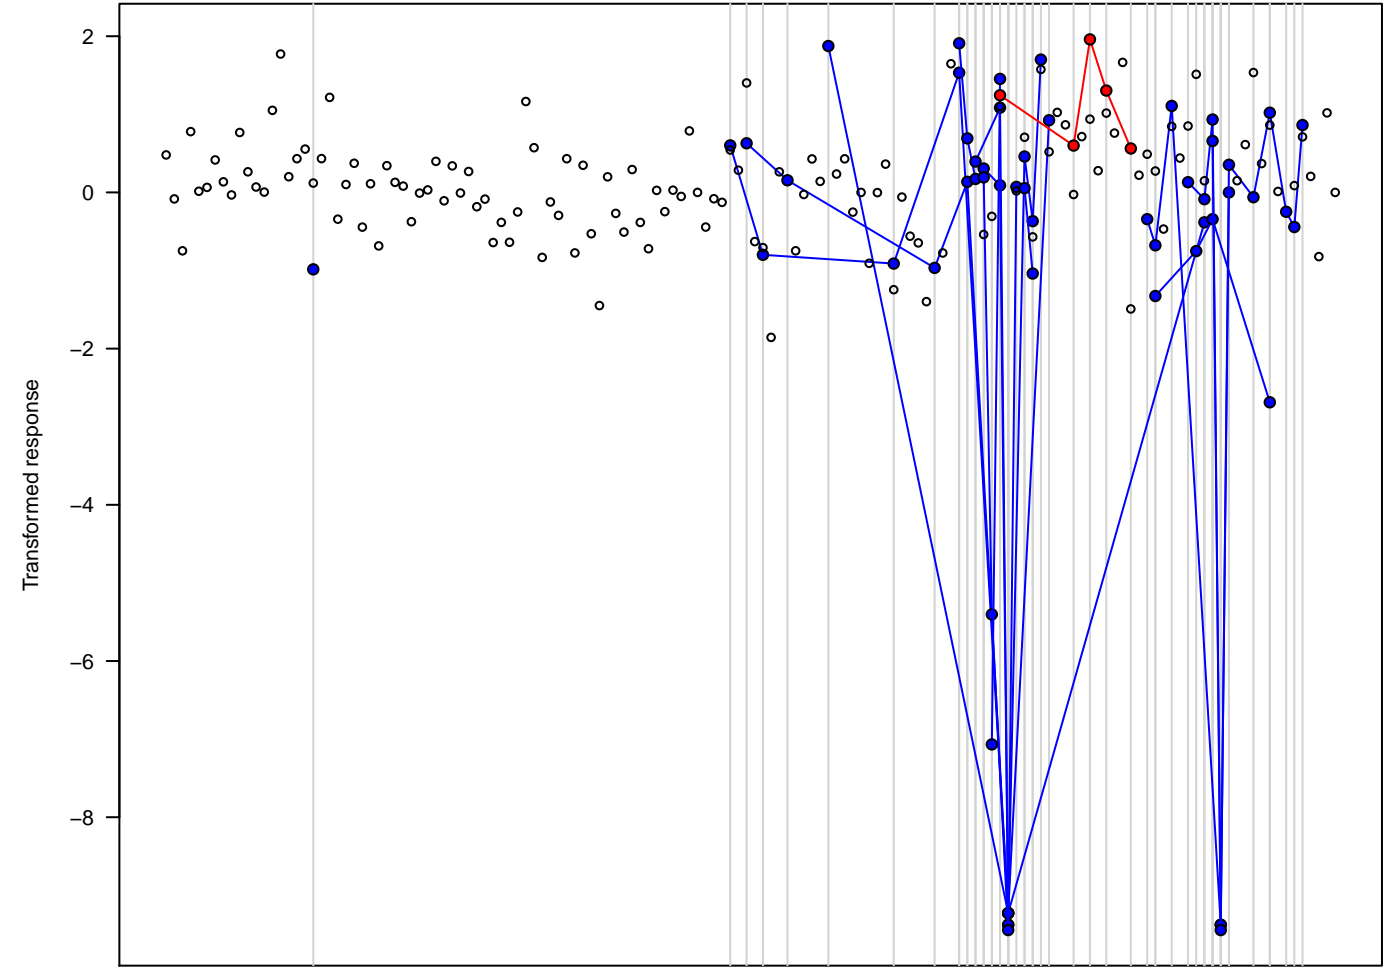

## WTSI

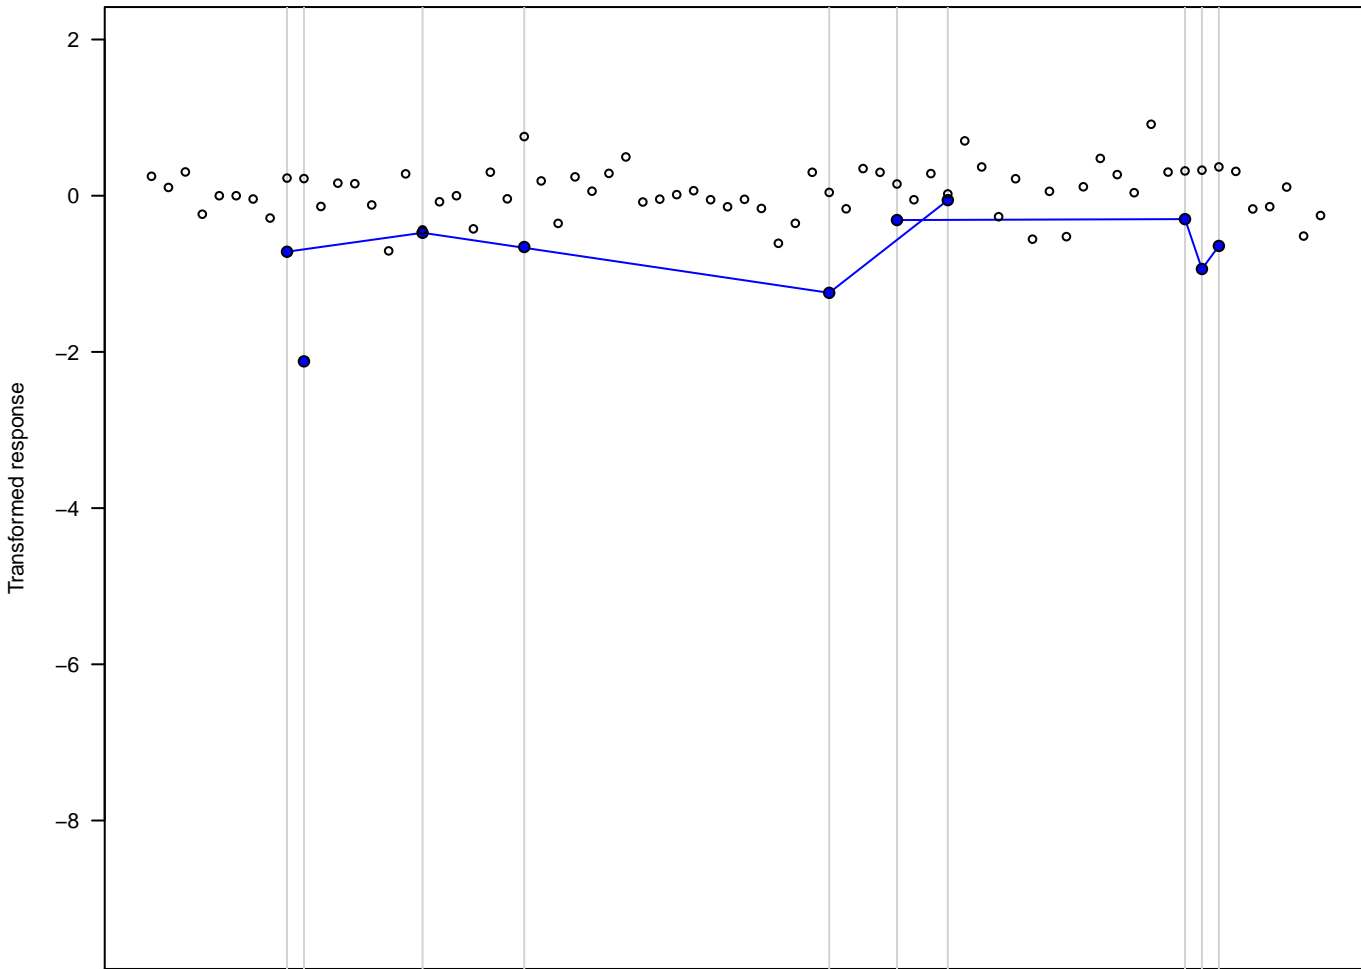

## ICS

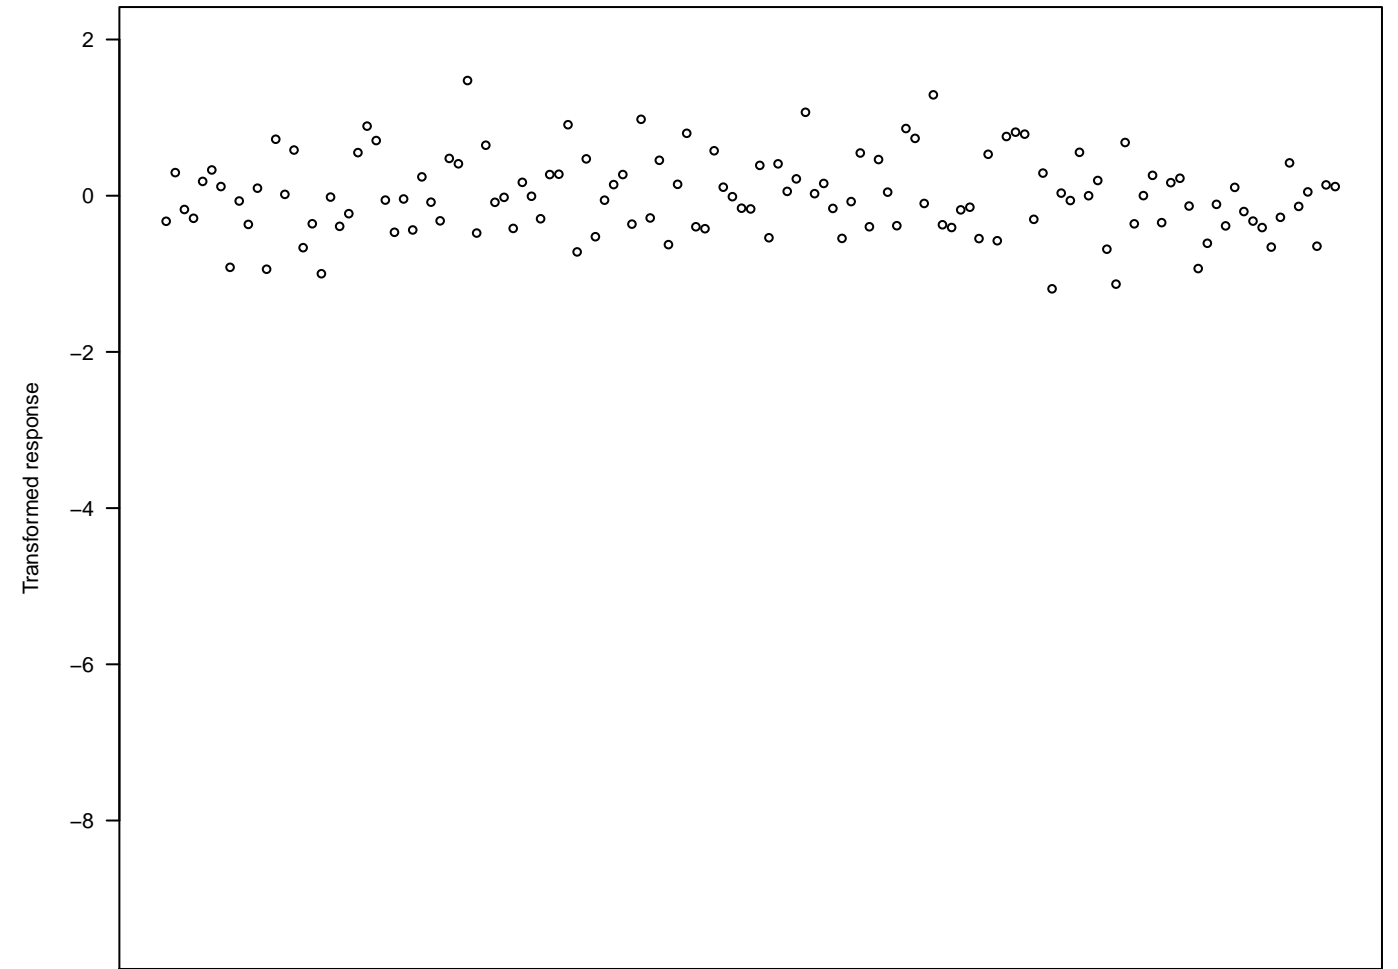

# Dysmorphology Body Weight (Body Weight)

## HMGU

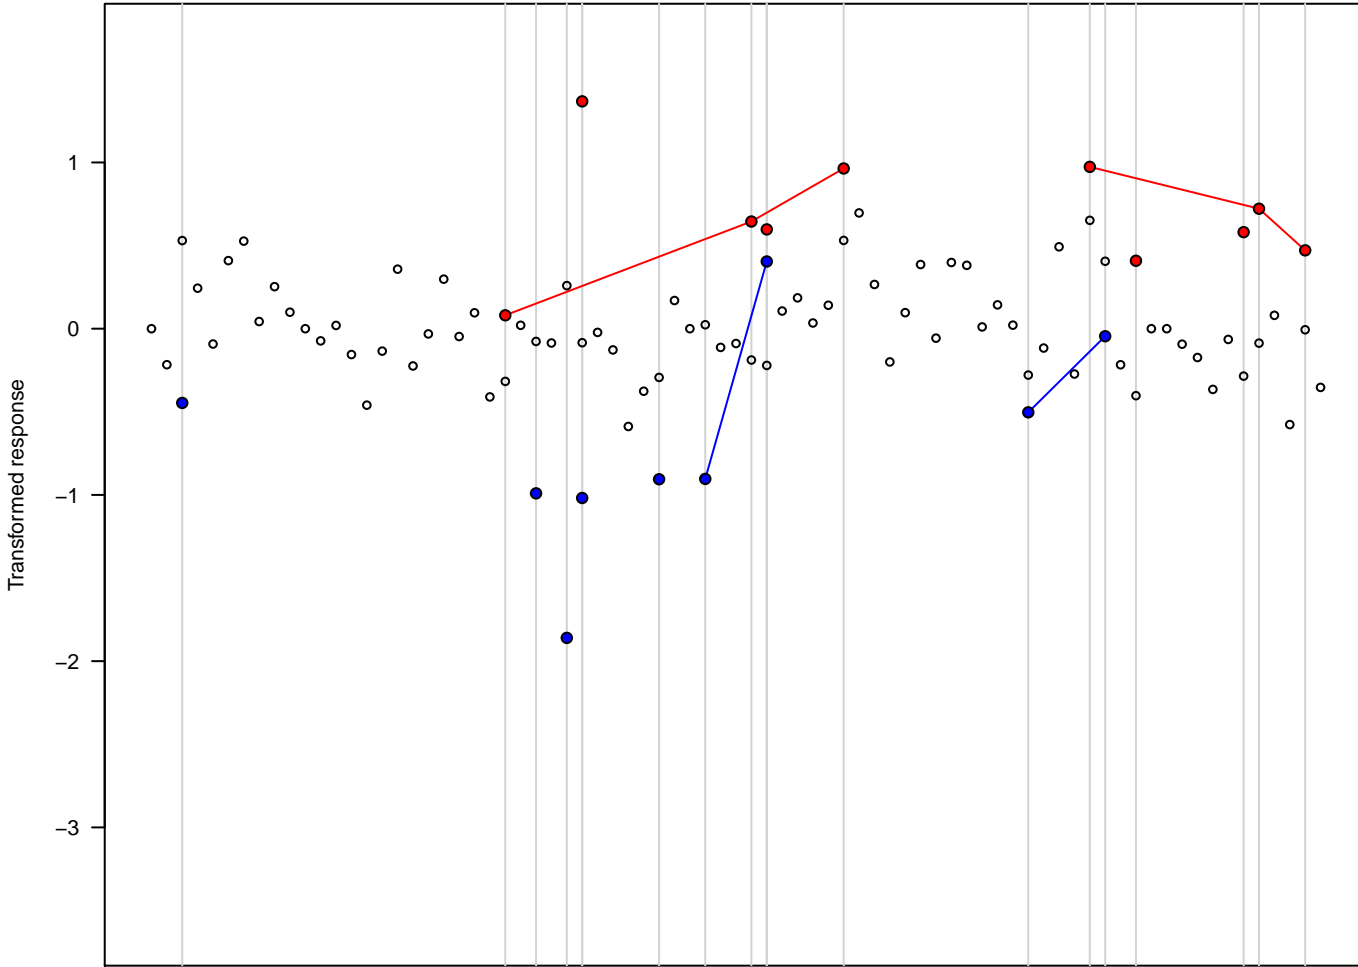

## MRC Harwell

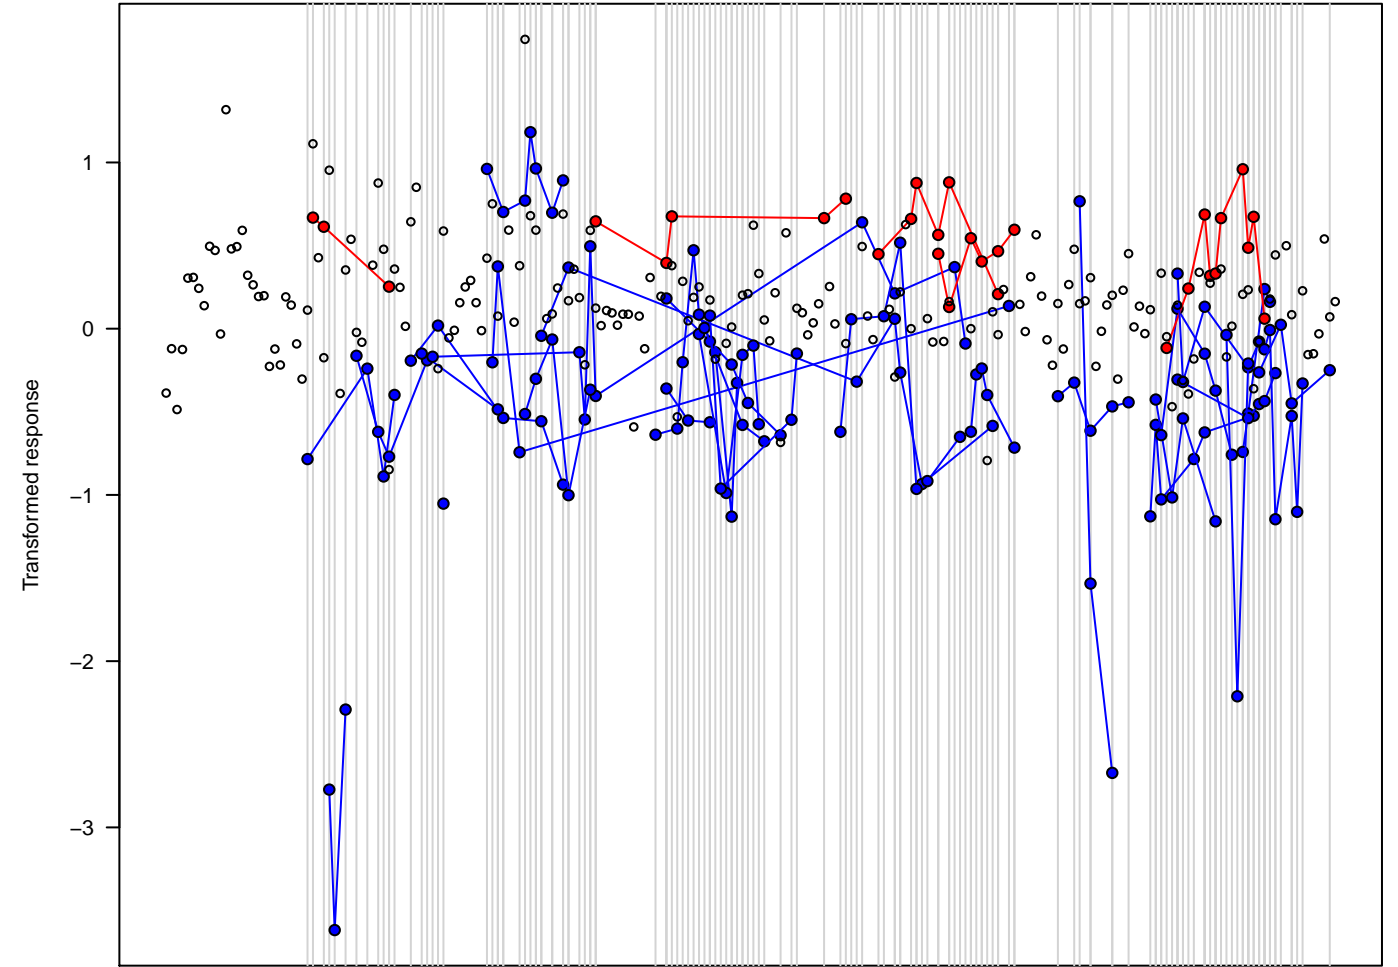

## WTSI

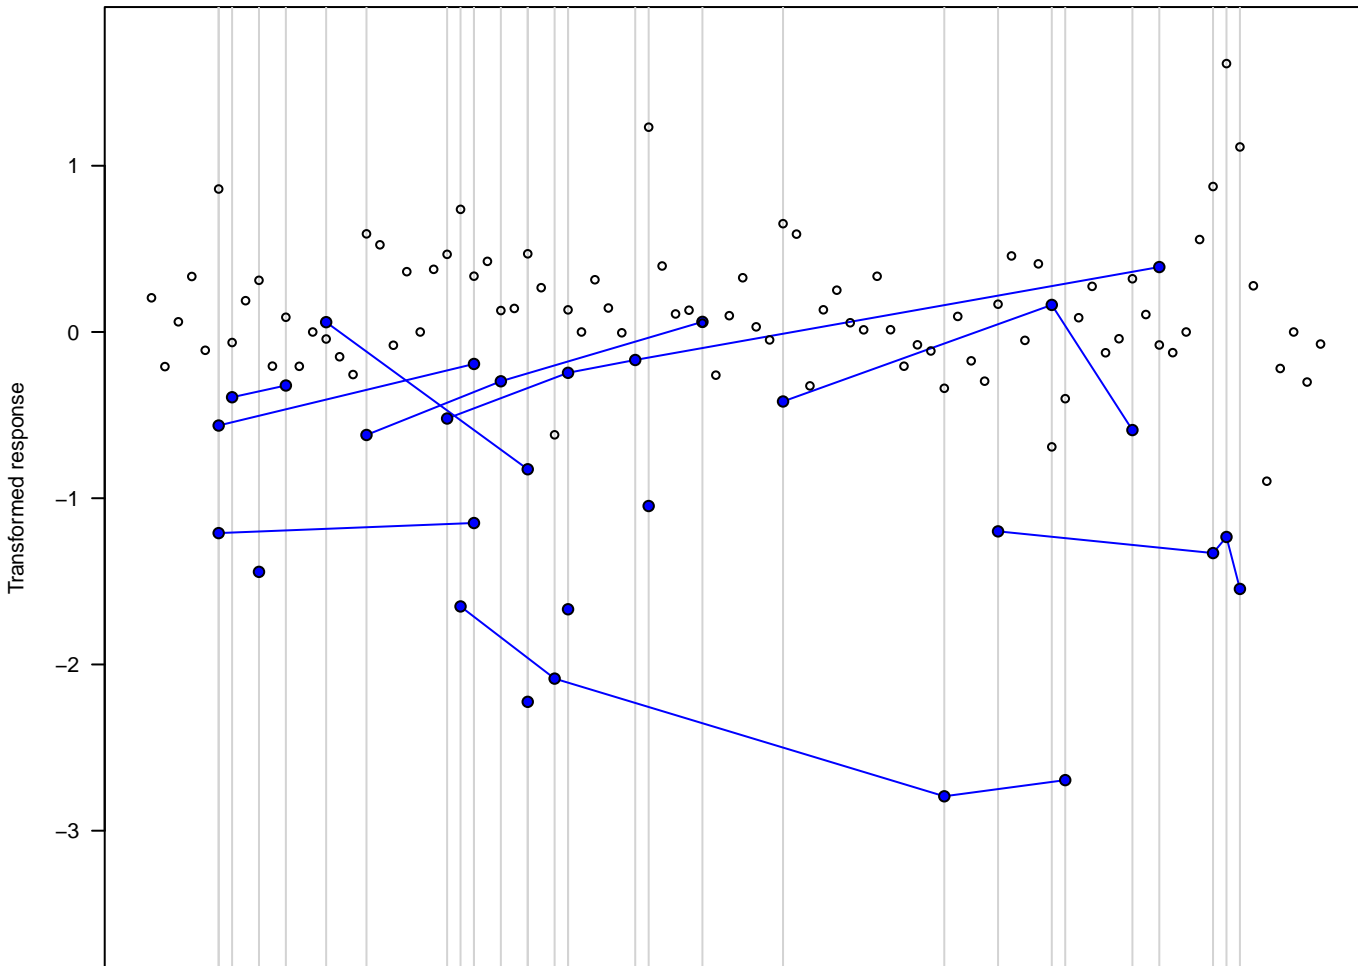

## ICS

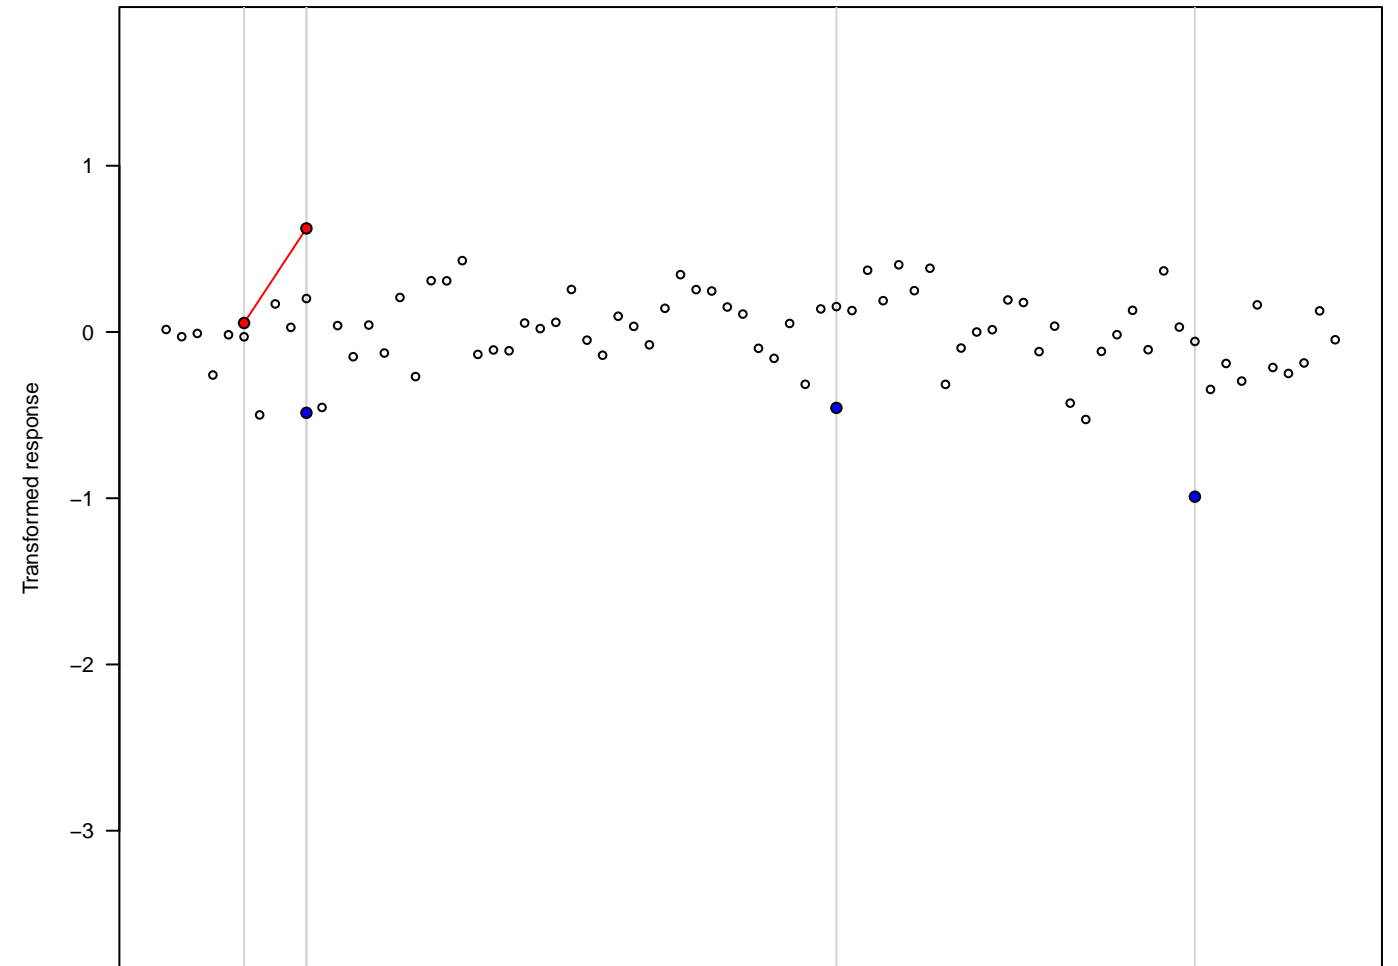

# Non-Invasive Blood Pressure Body Weight (Body Weight)

## HMGU

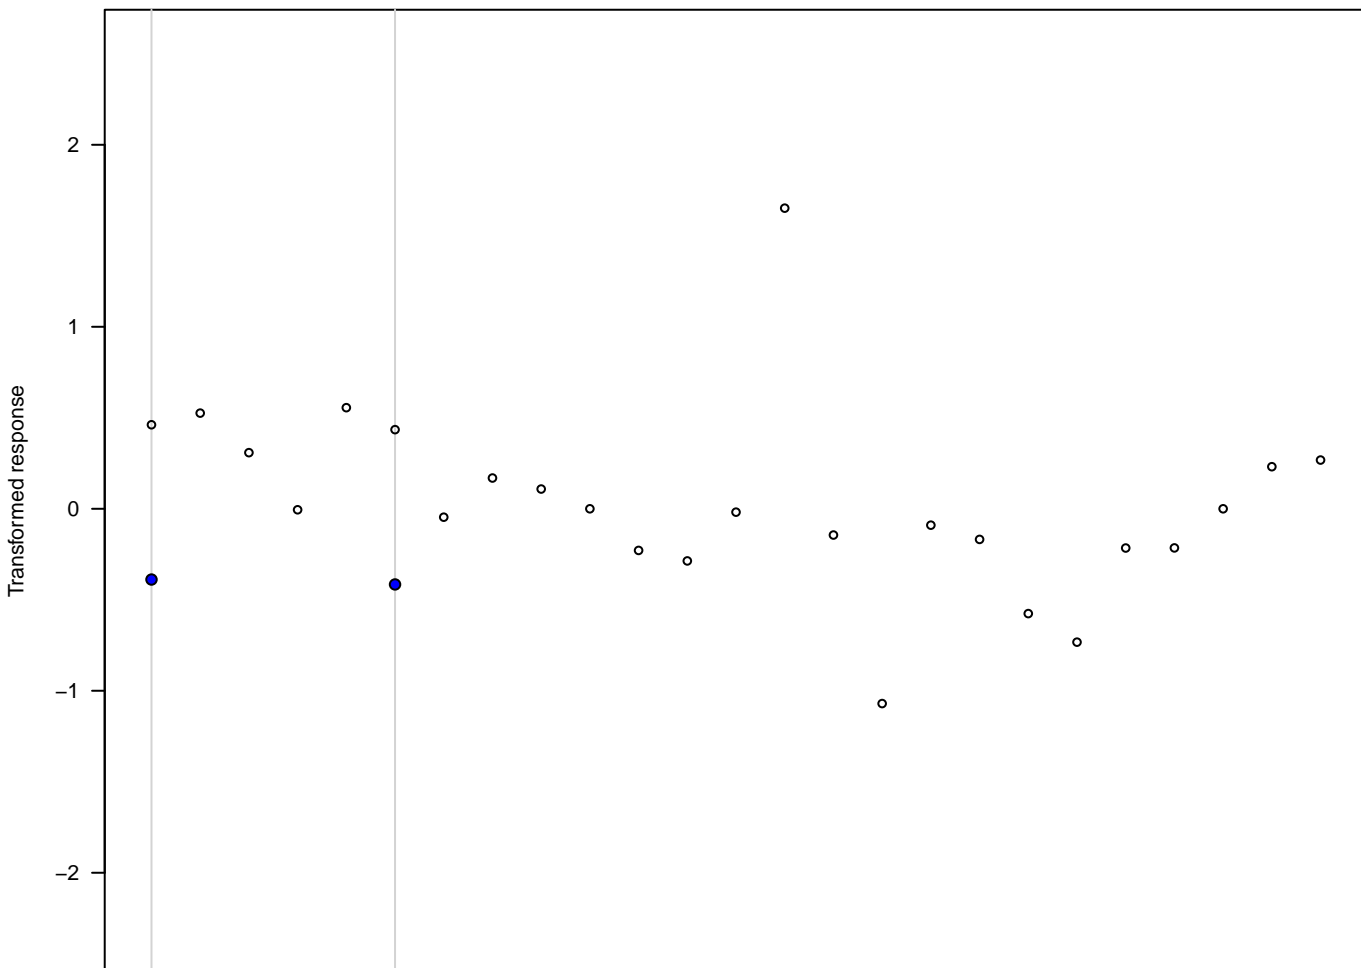

## MRC Harwell

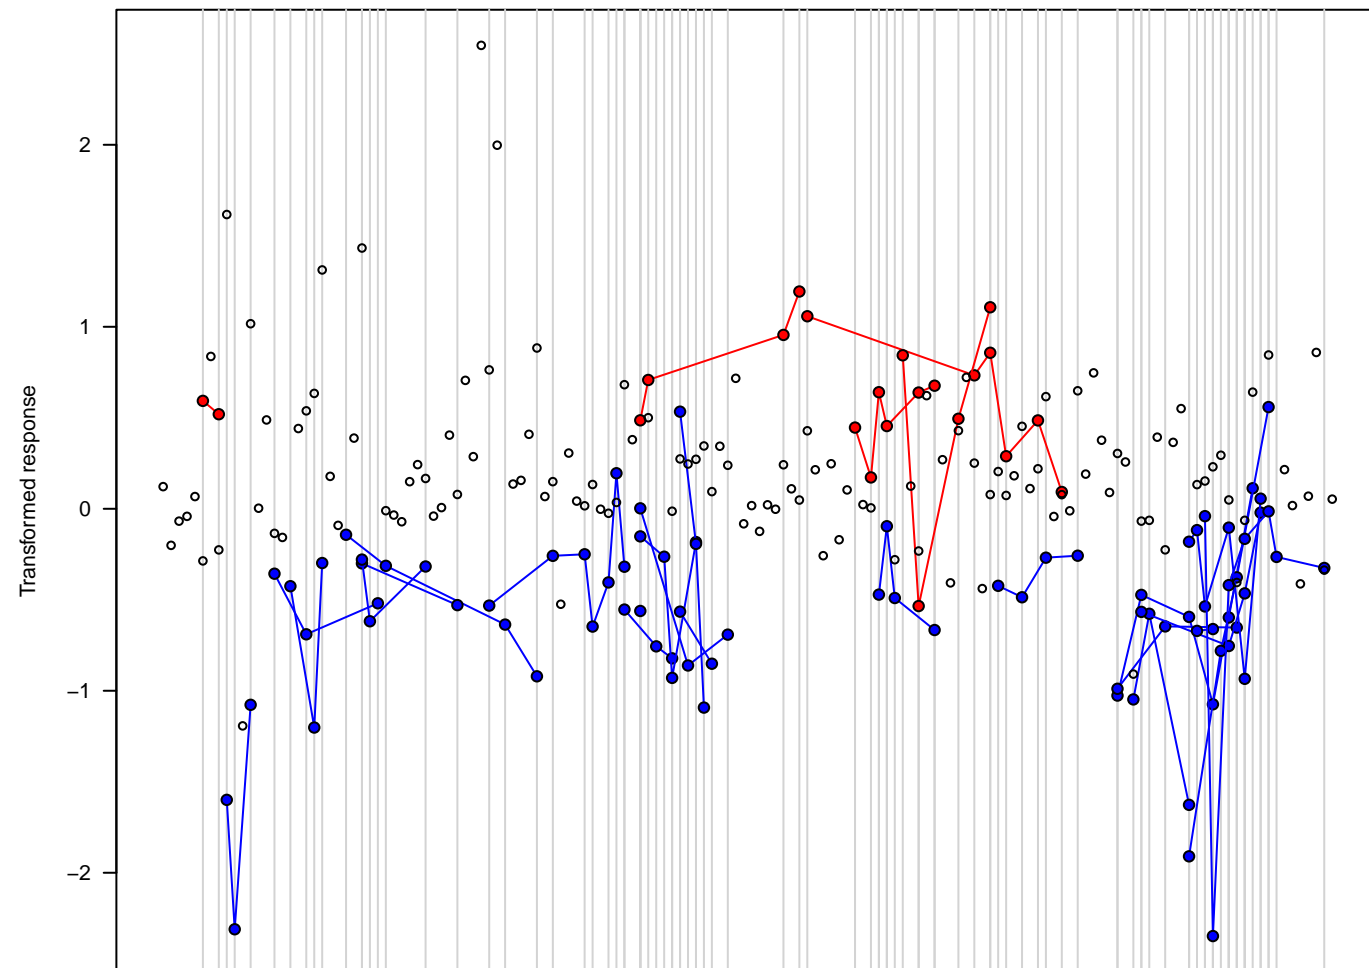

## WTSI



## ICS

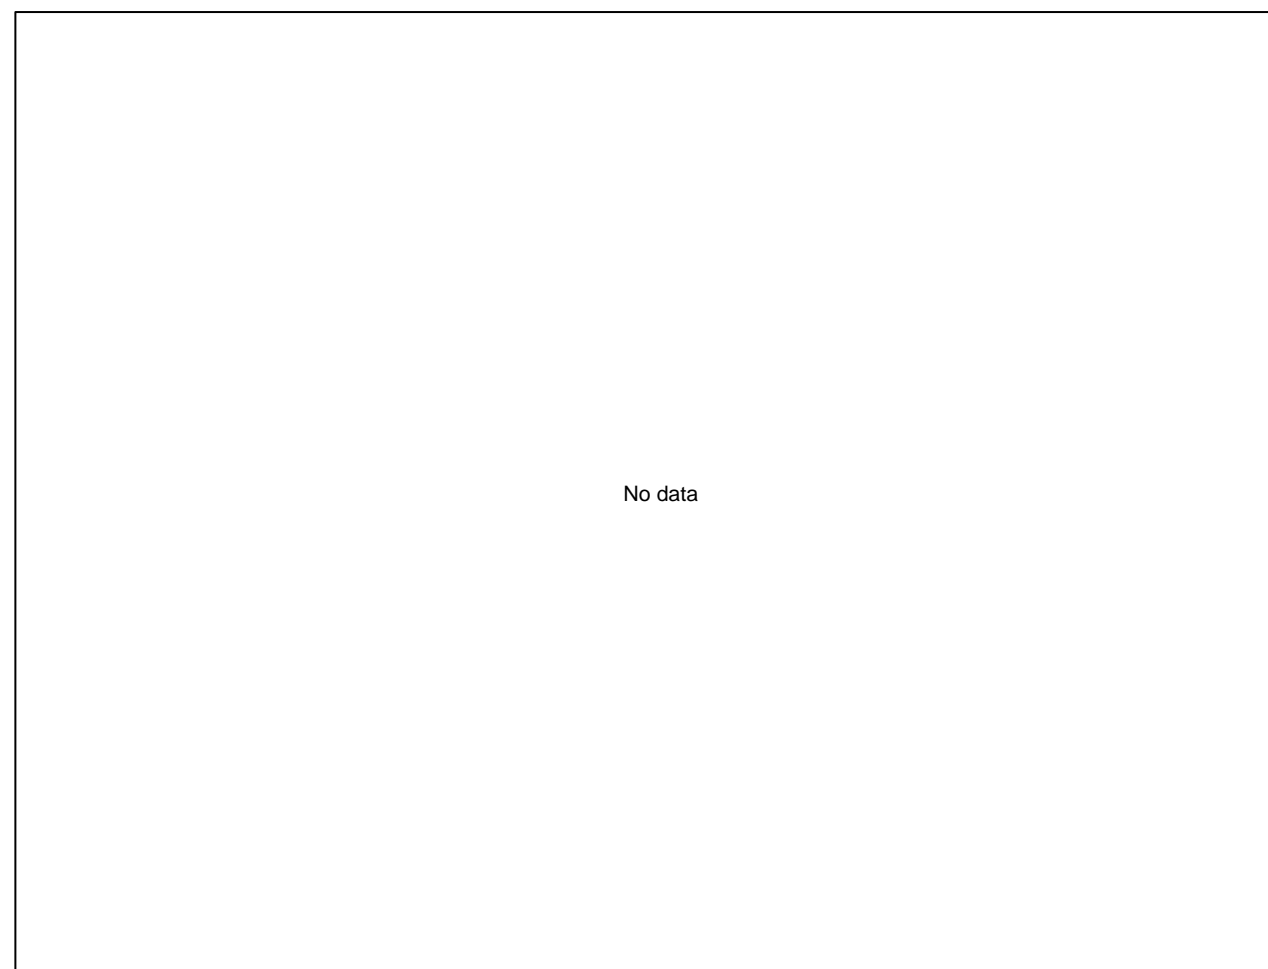

# Calorimetry Body Weight (Body Weight)

## HMGU

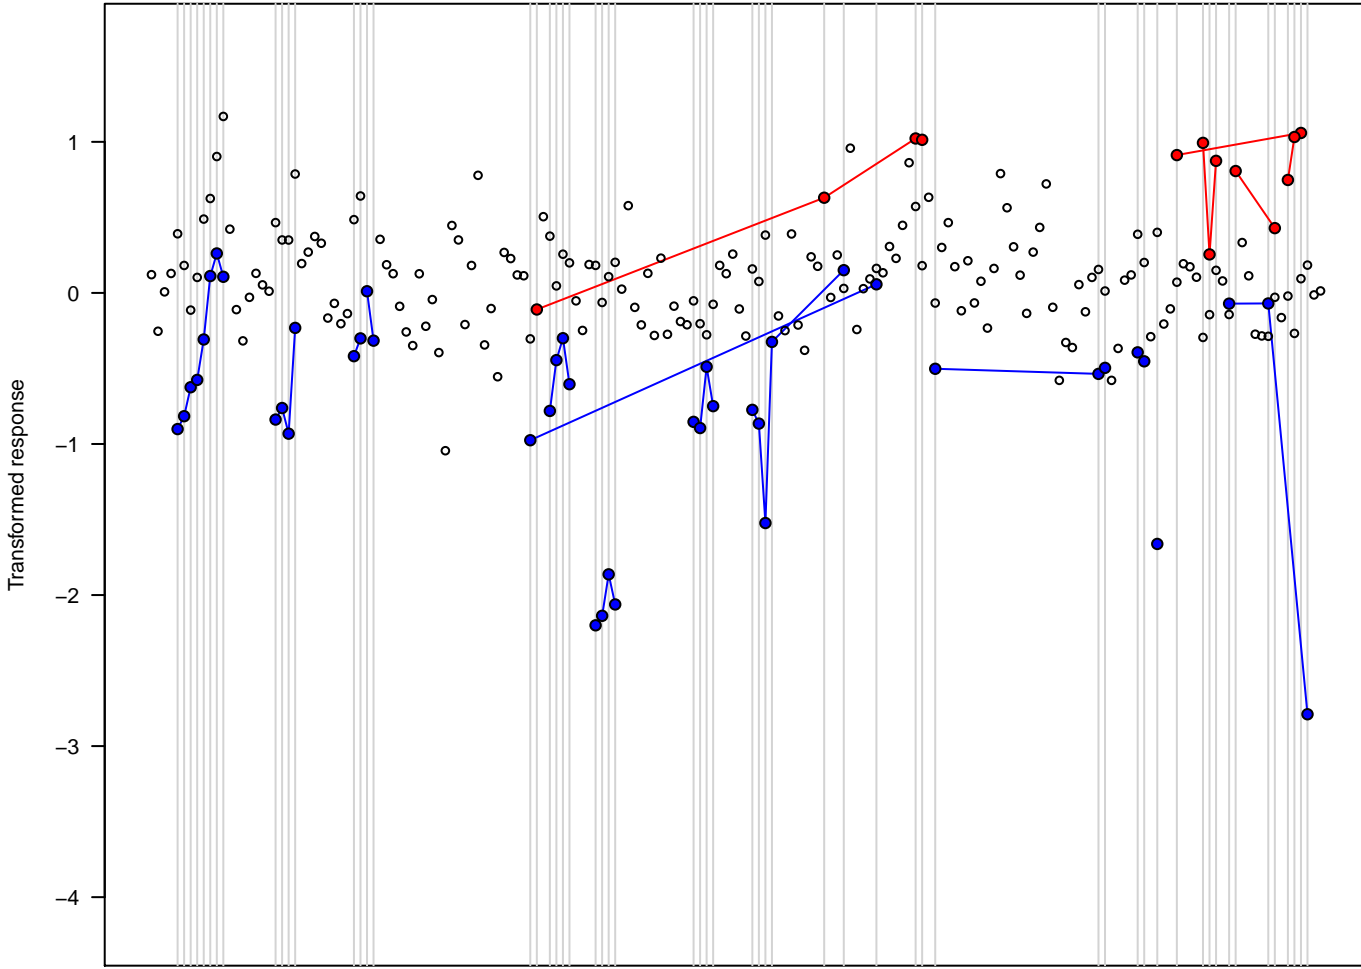

## MRC Harwell

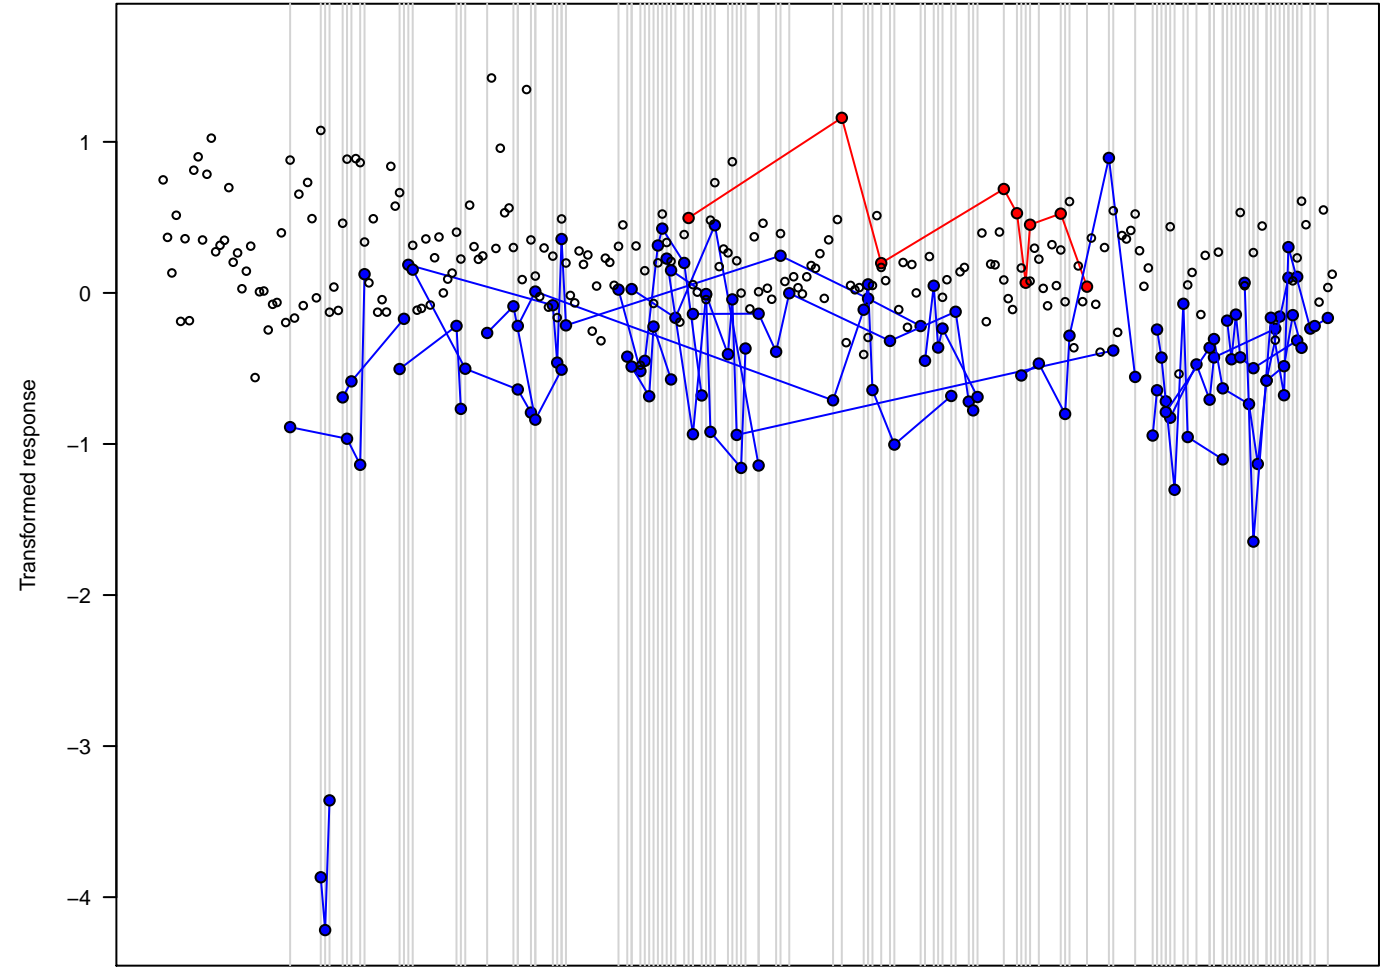

## WTSI

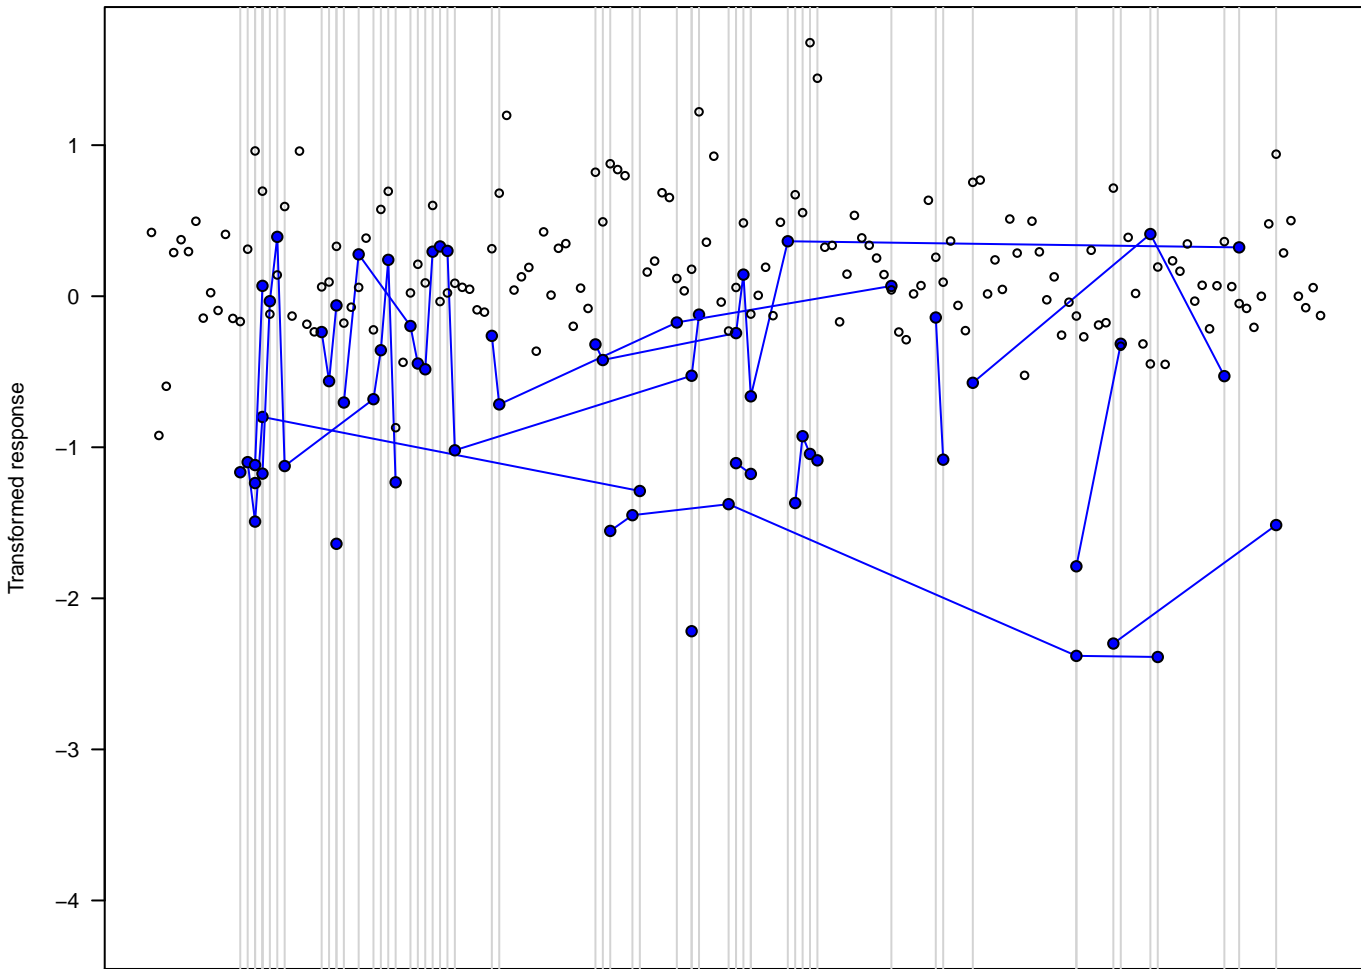

## ICS

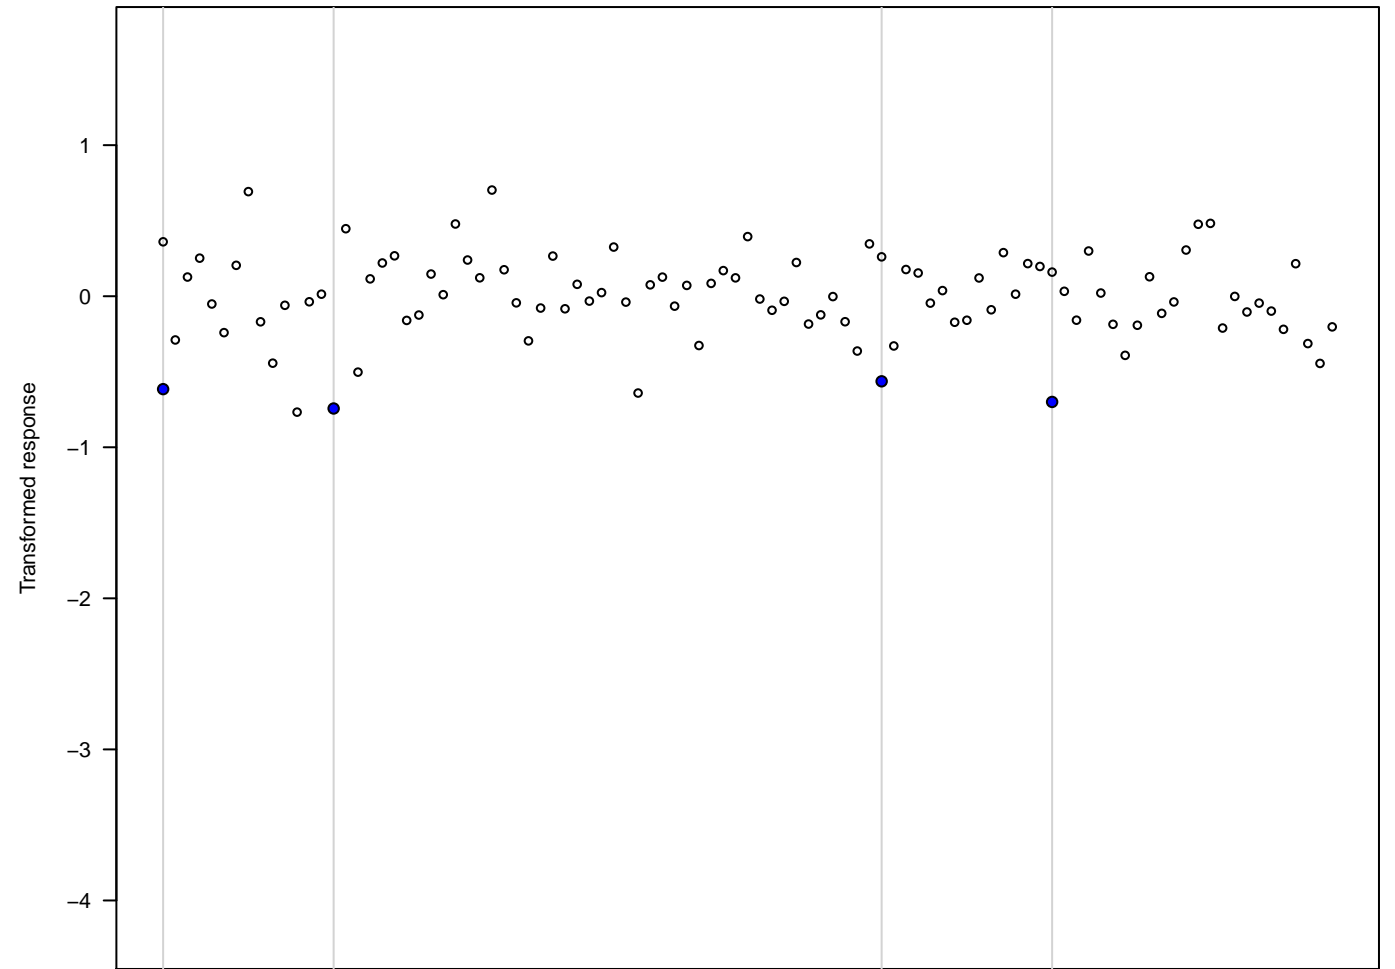

# Simplified IPGTT Body Weight (Body Weight)

## HMGU

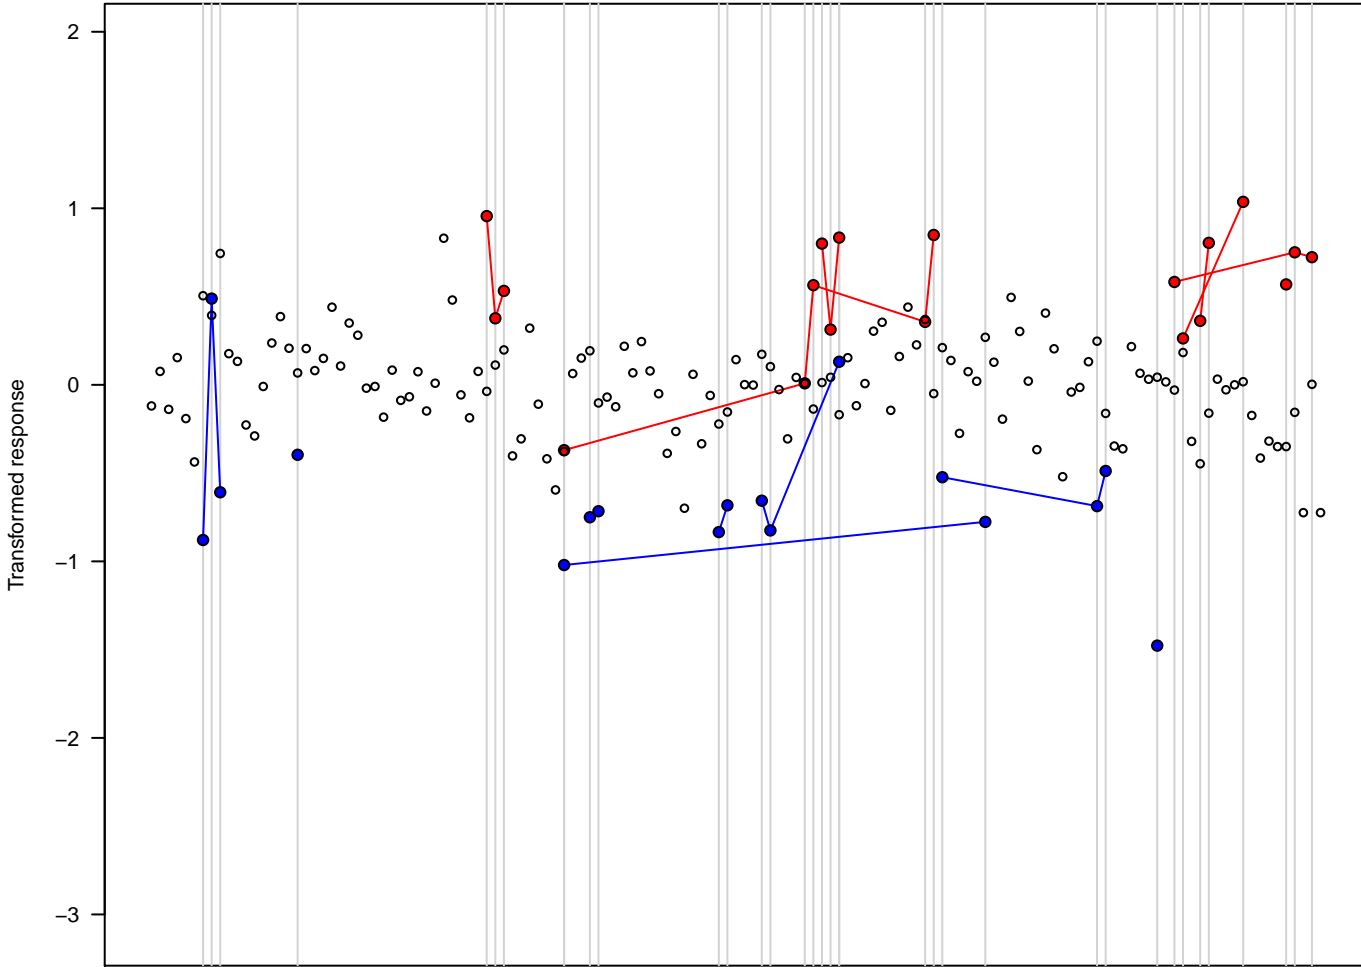

## MRC Harwell

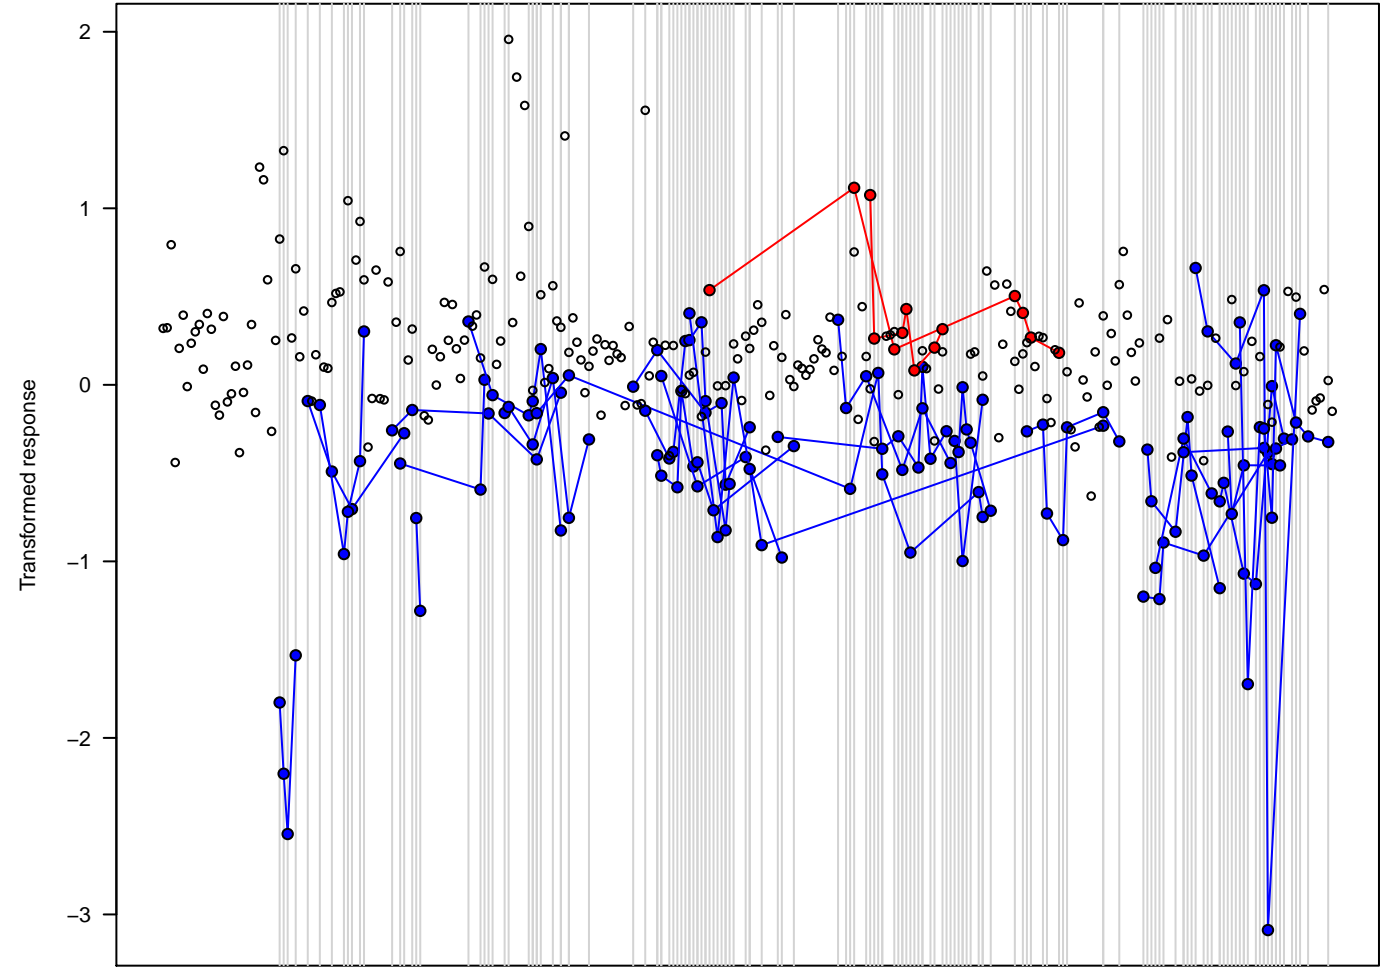

## WTSI

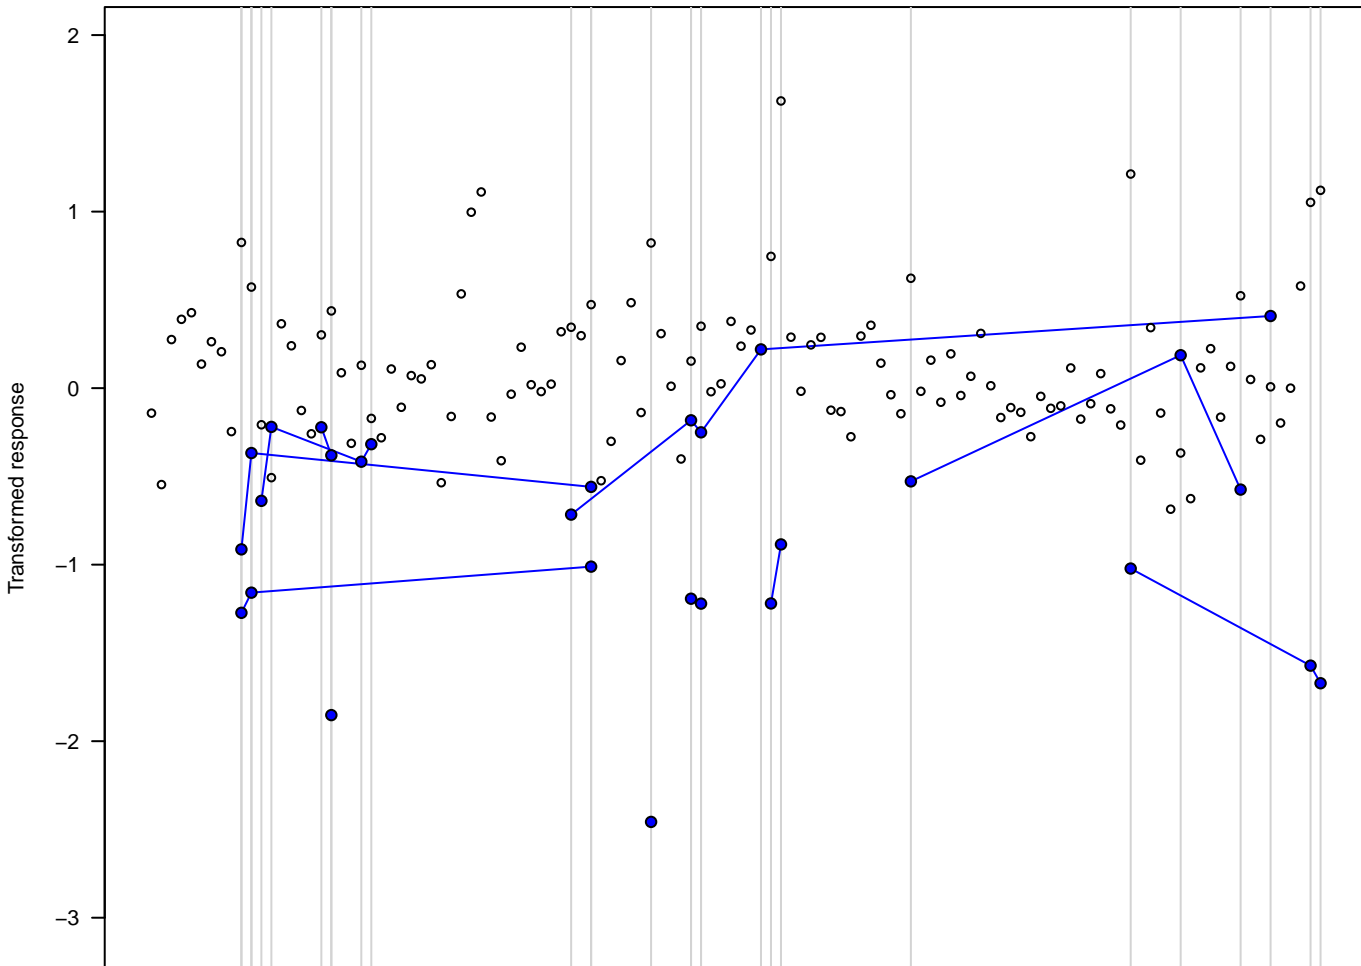

## ICS

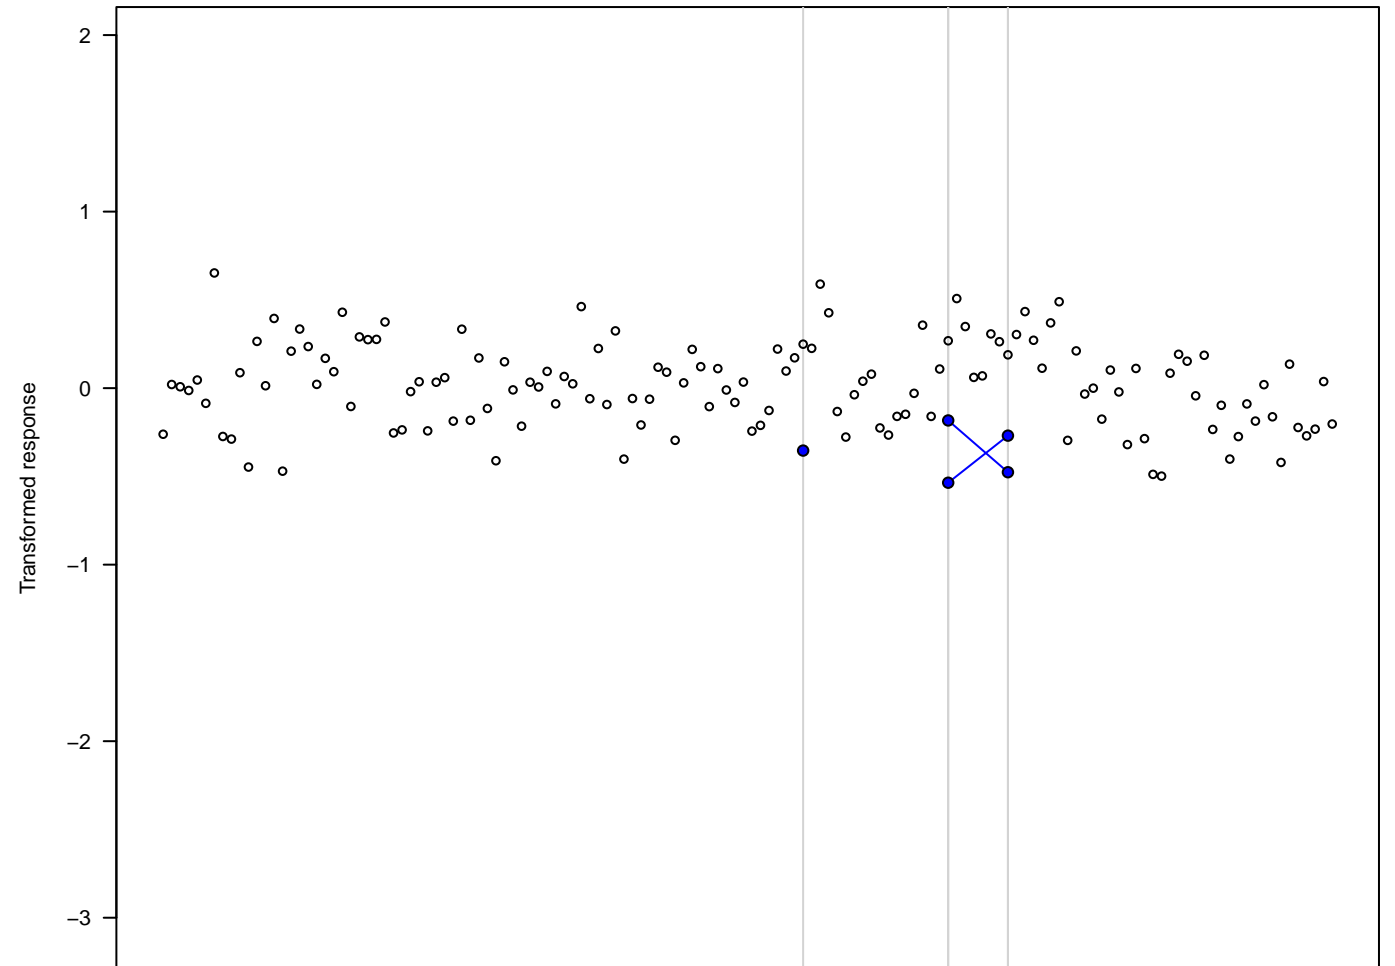

# Dexa Body Weight (Body Weight)

## HMGU

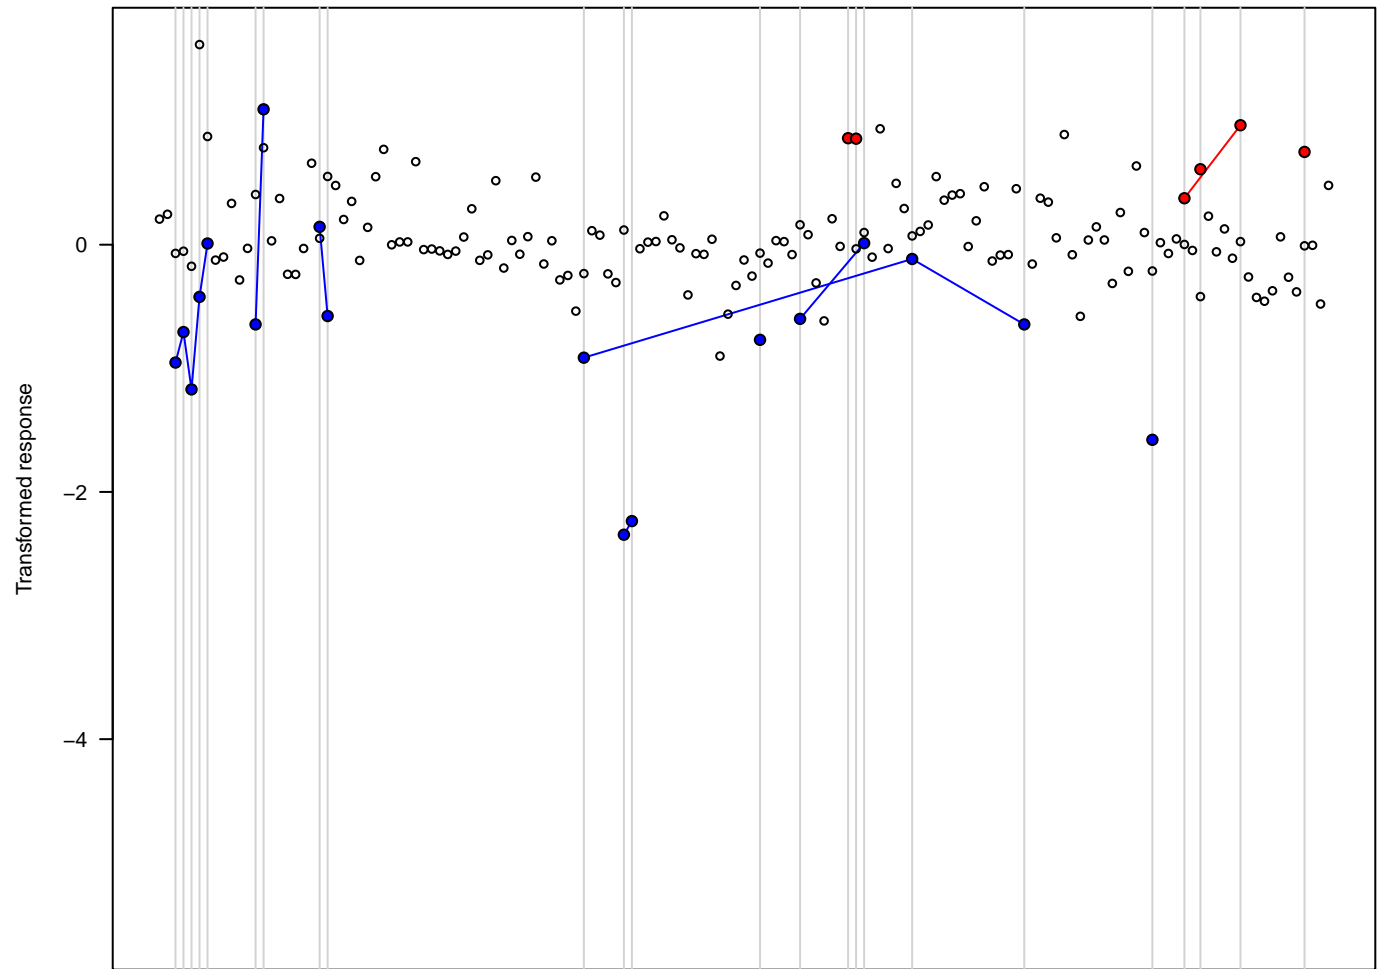

## MRC Harwell

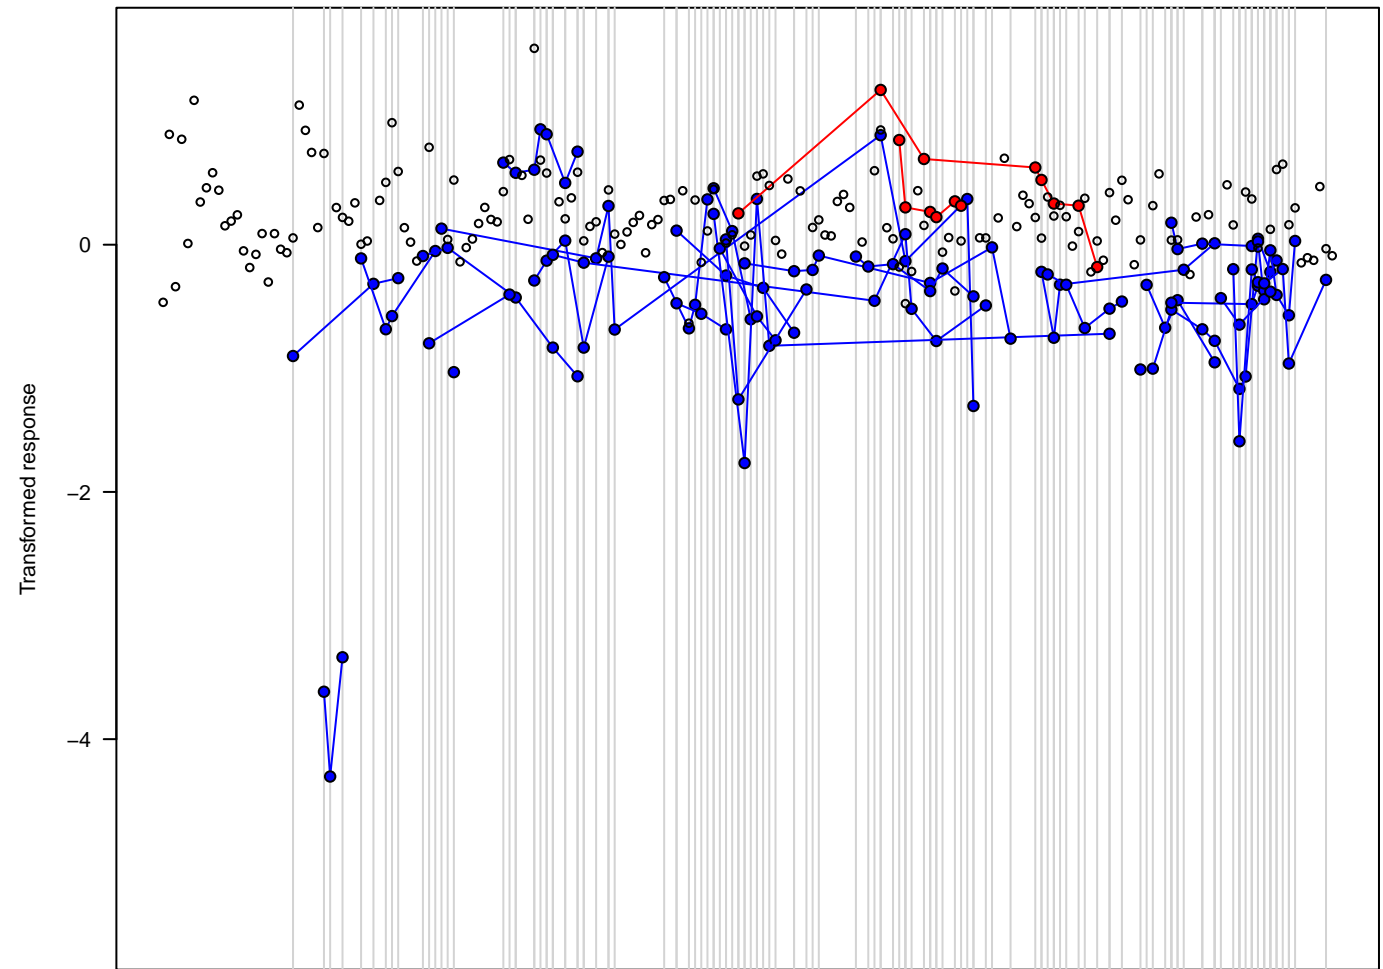

## WTSI

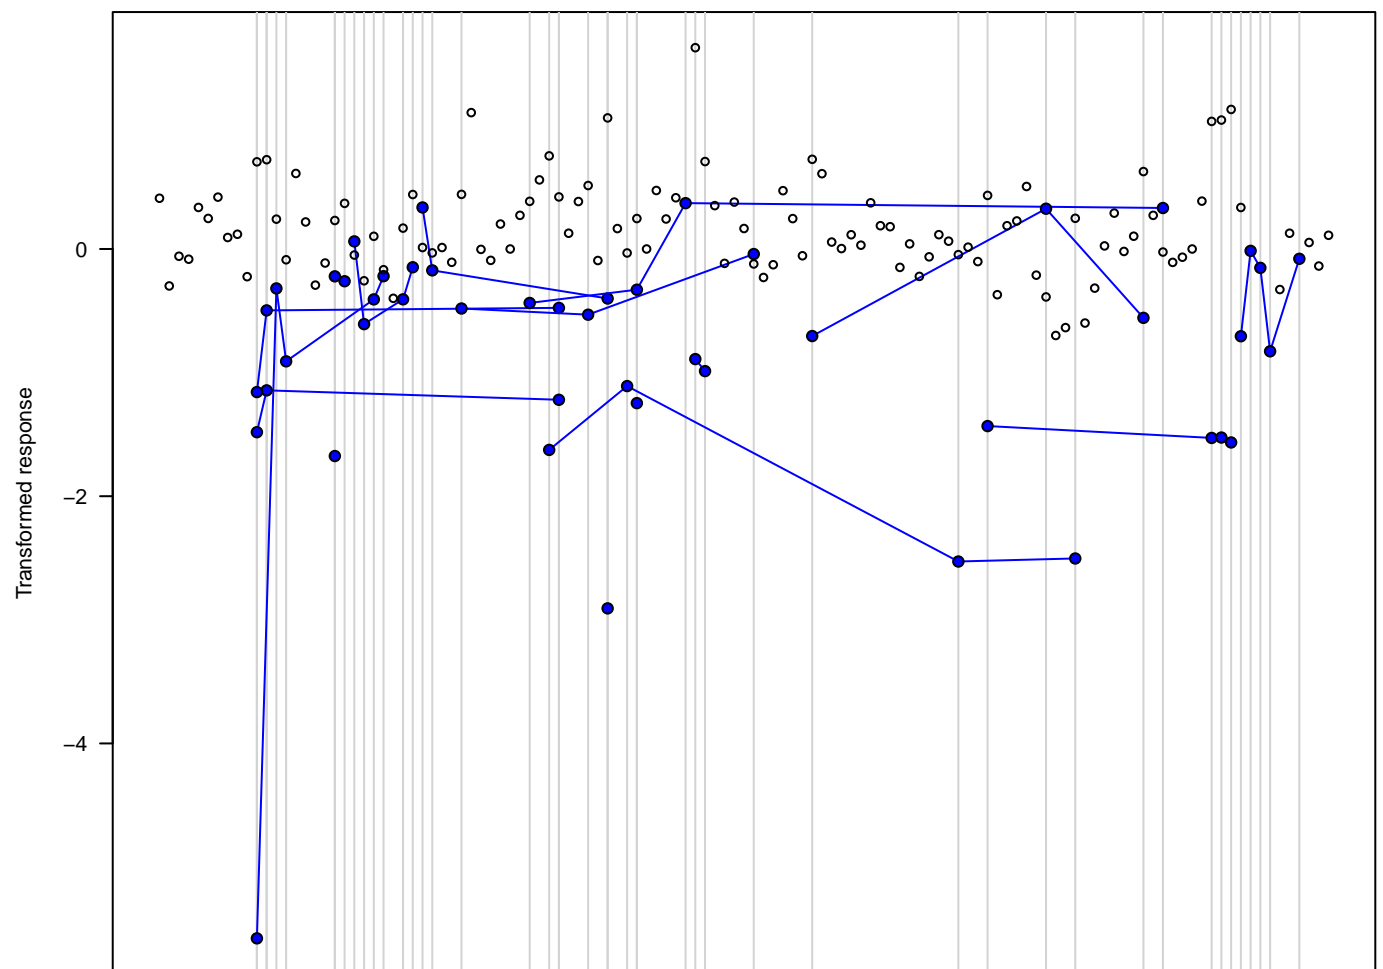

## ICS

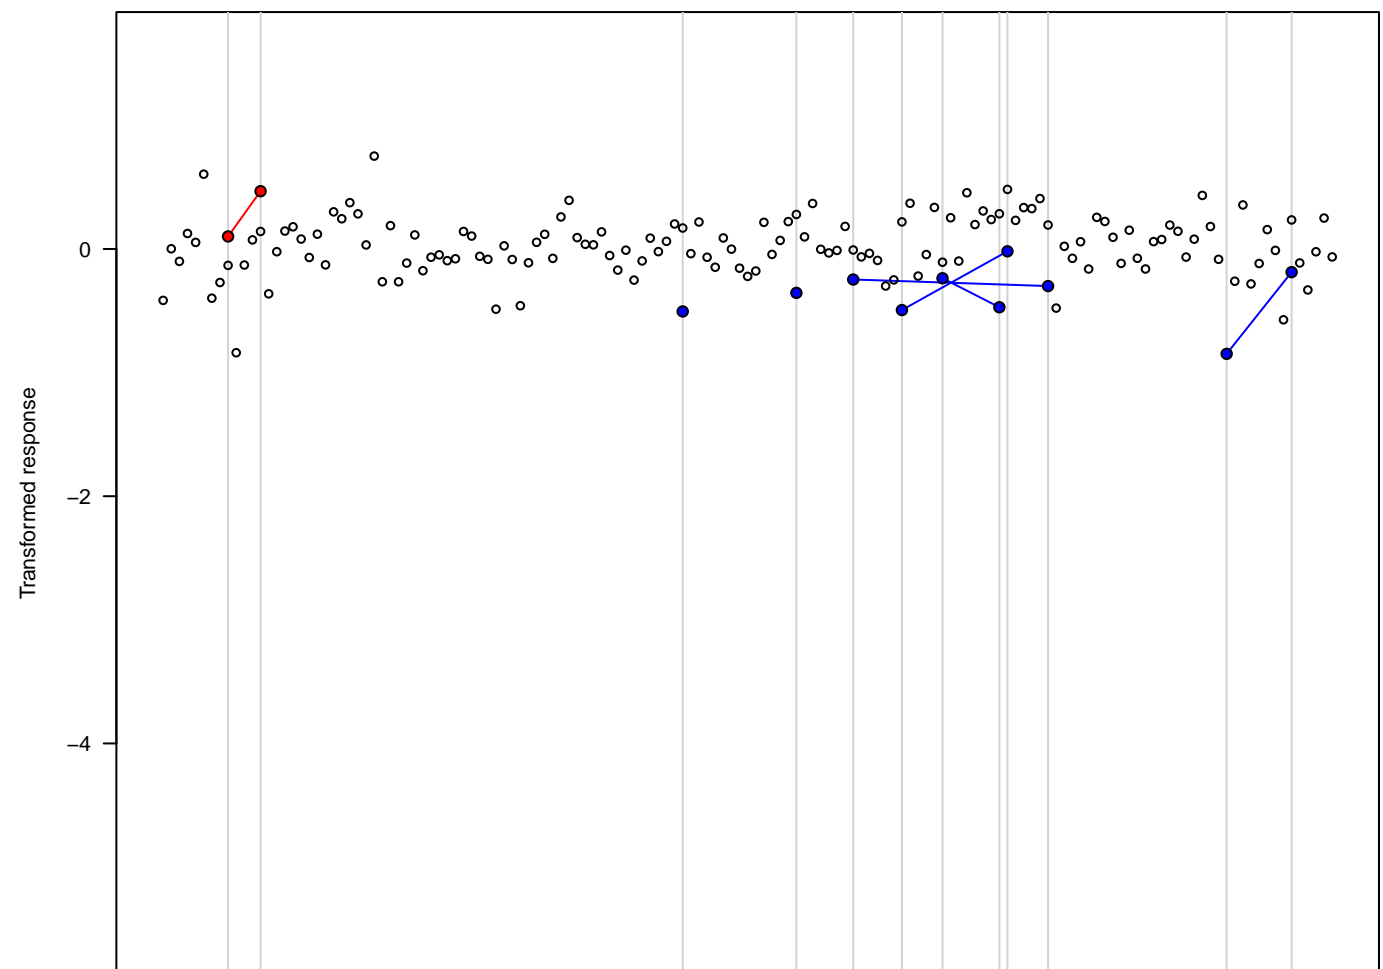

Heart Weight/Tibia Length Body Weight  
(Body Weight)

HMGU

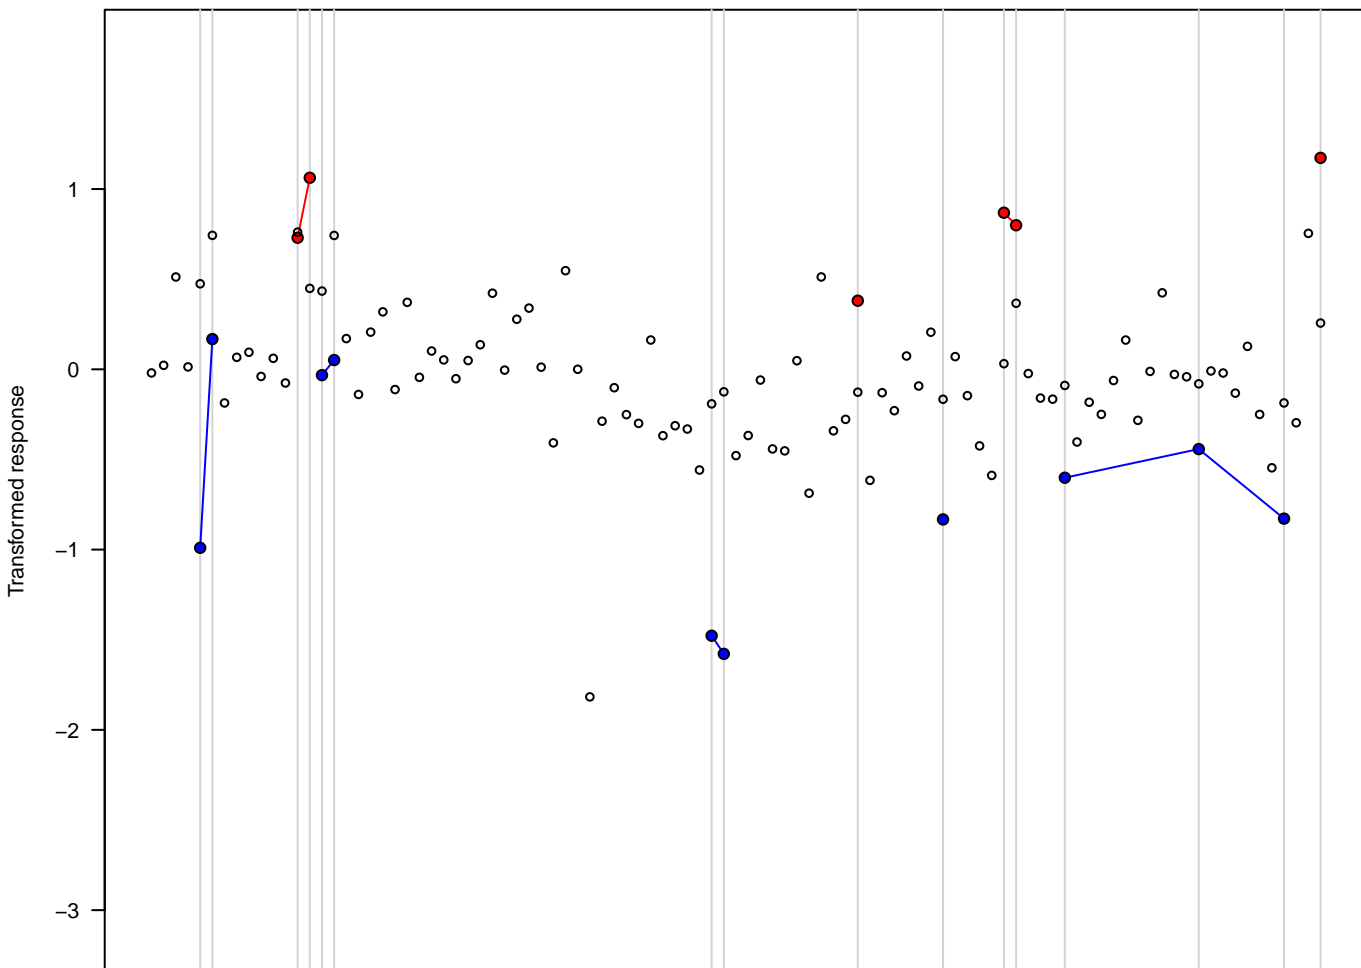

MRC Harwell

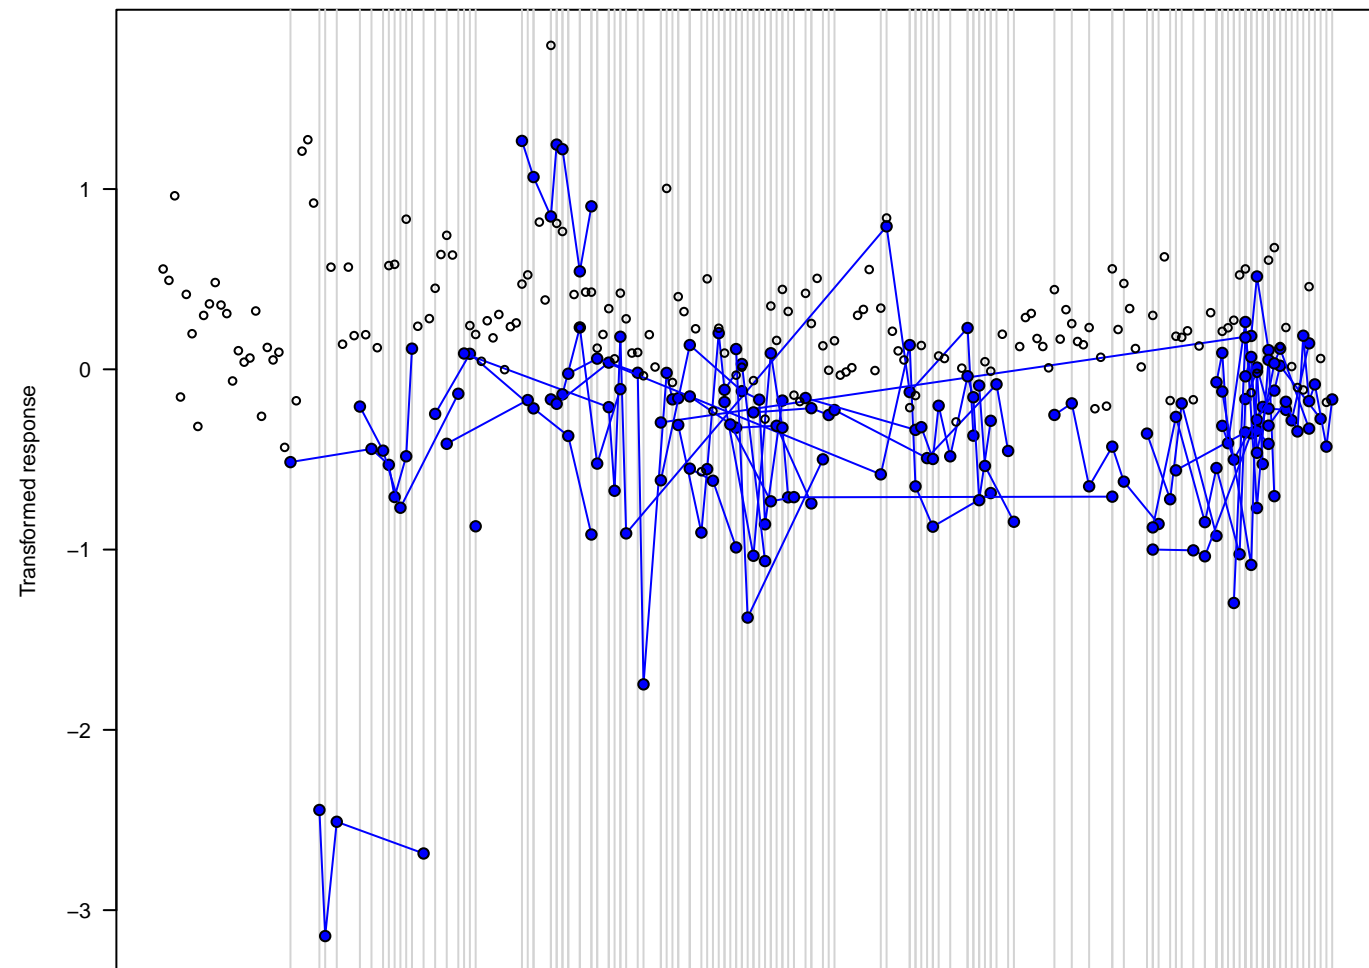

WTSI

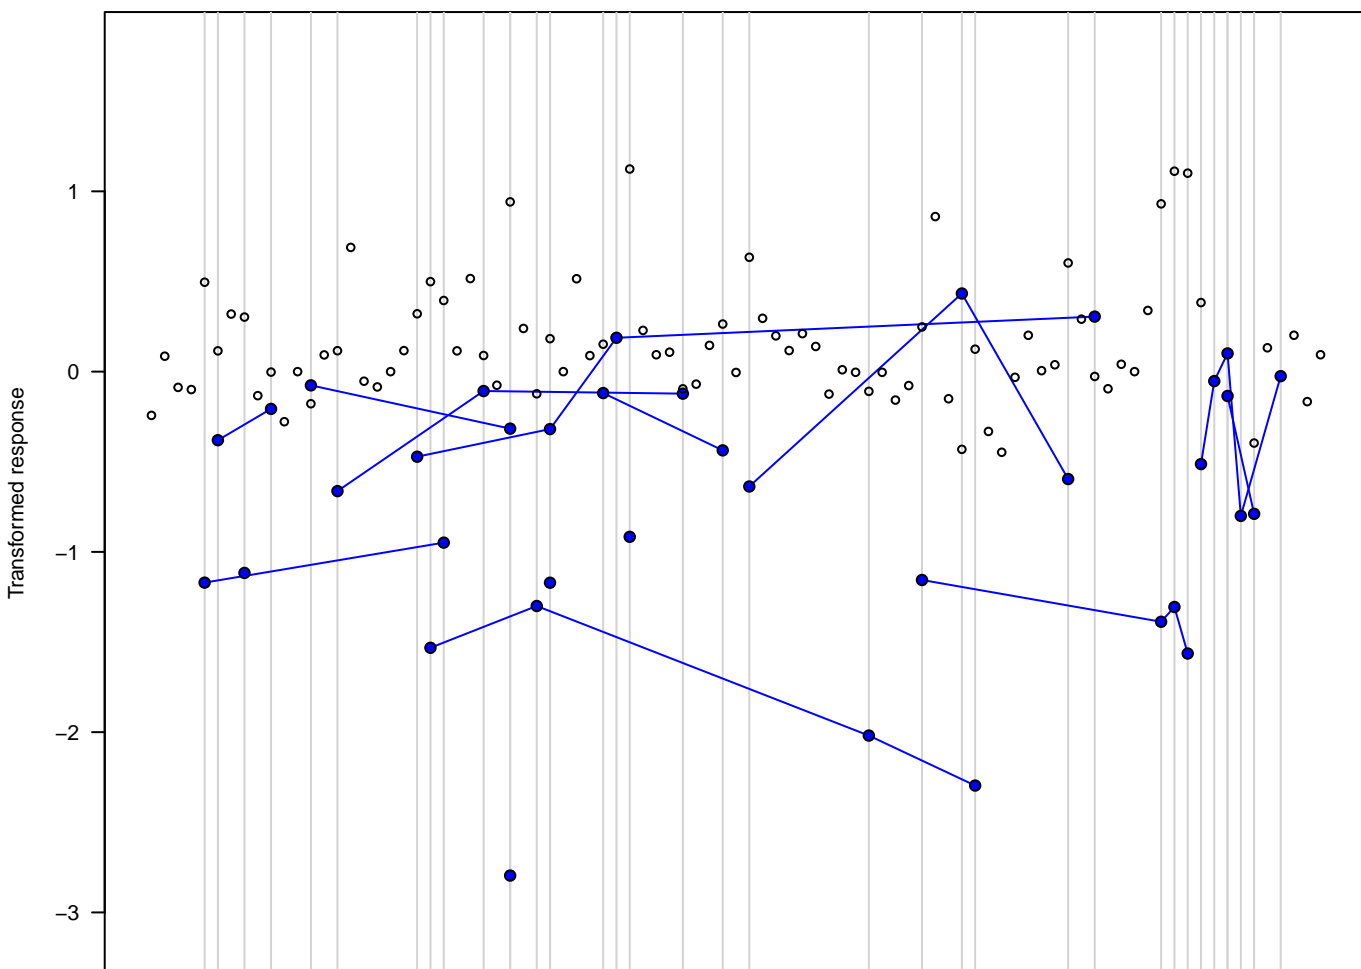

ICS

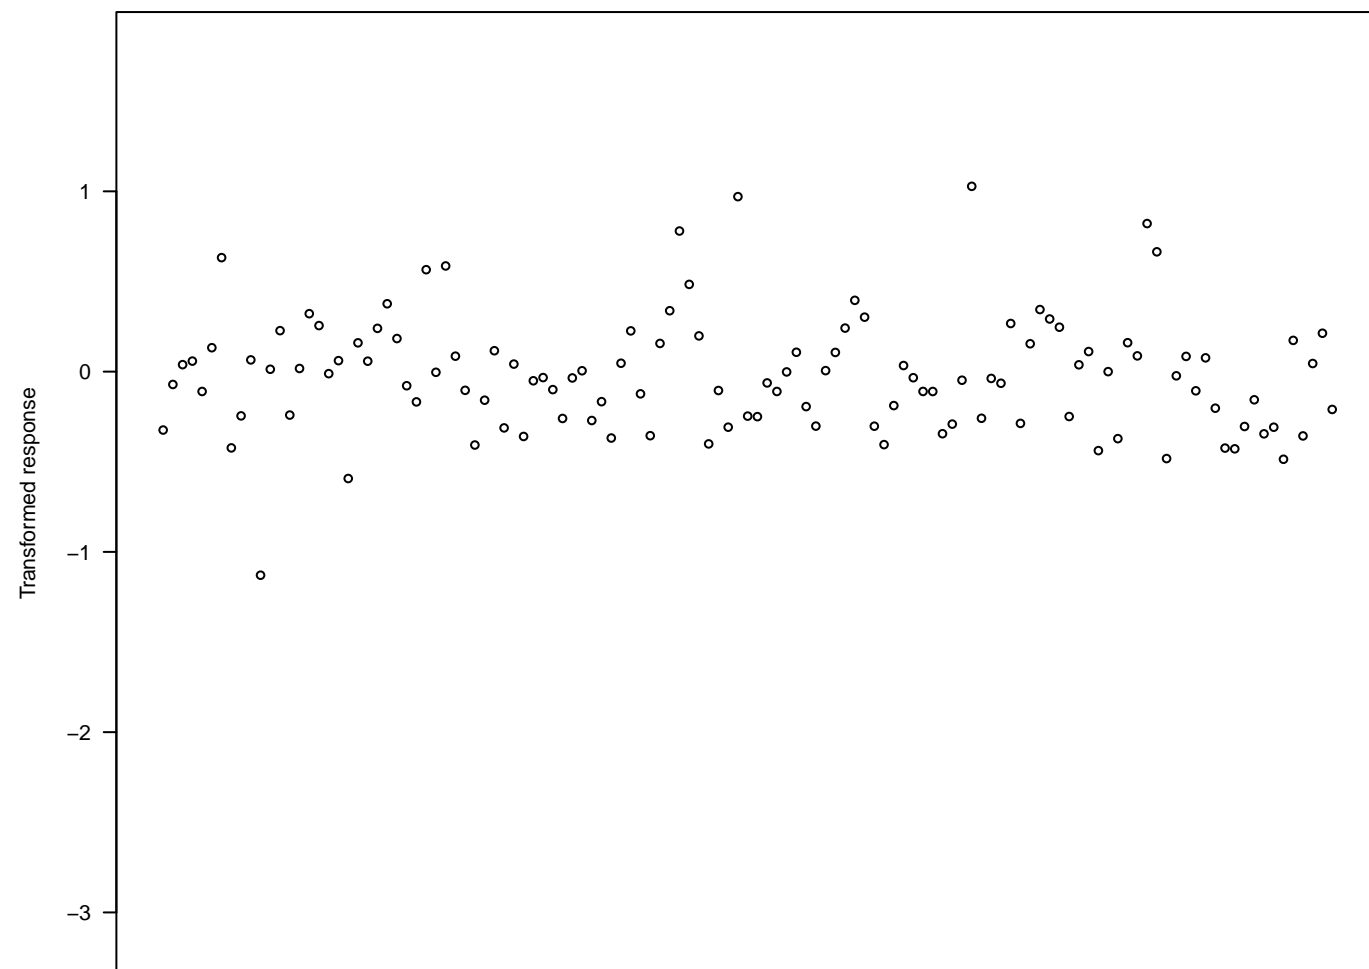

# Grip Strength Body Weight (Body Weight)

## HMGU

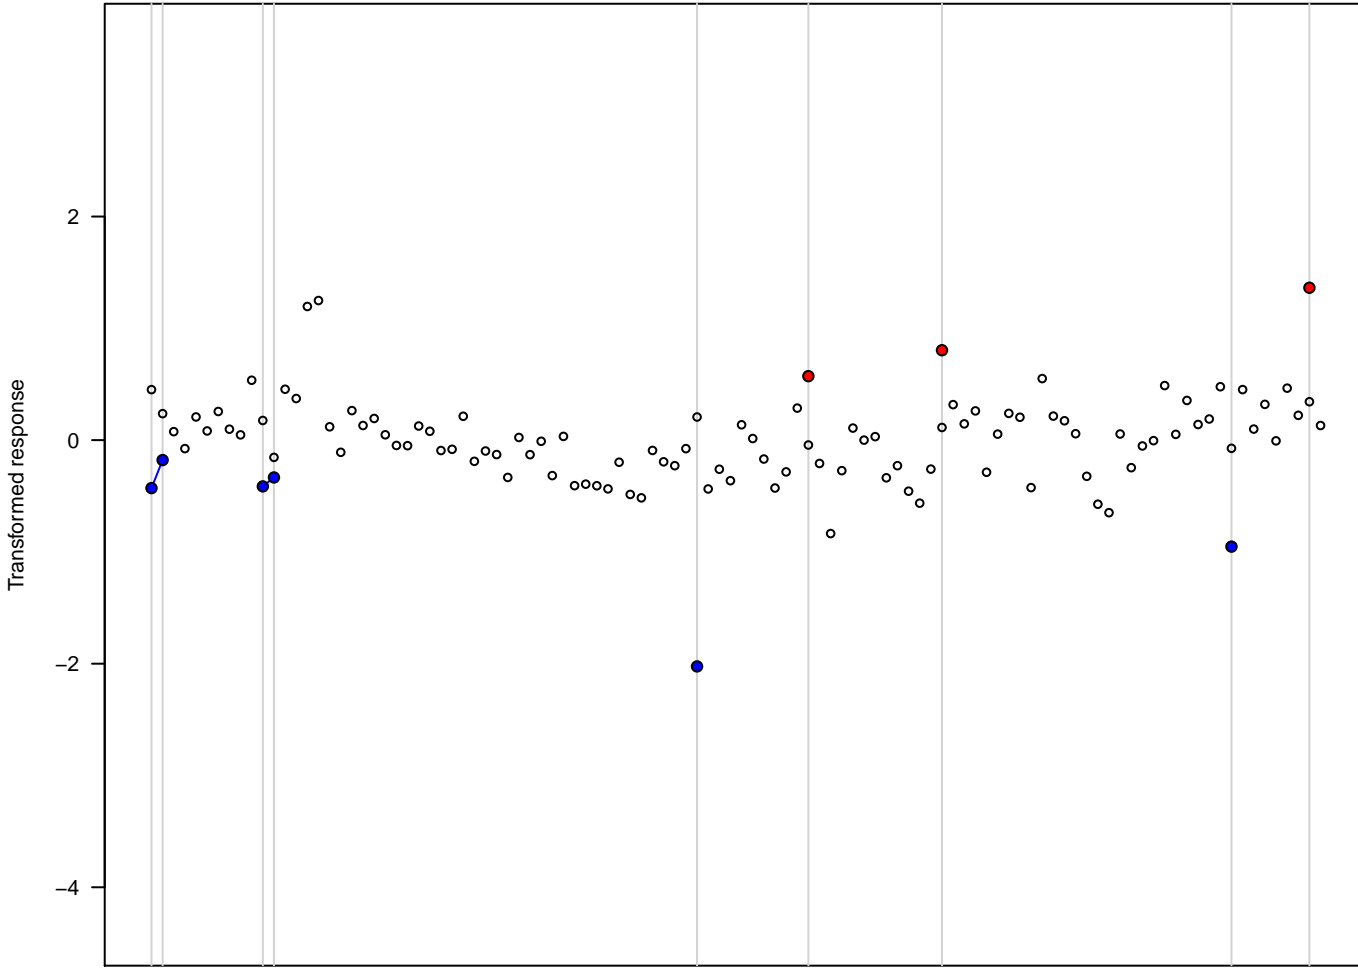

## MRC Harwell

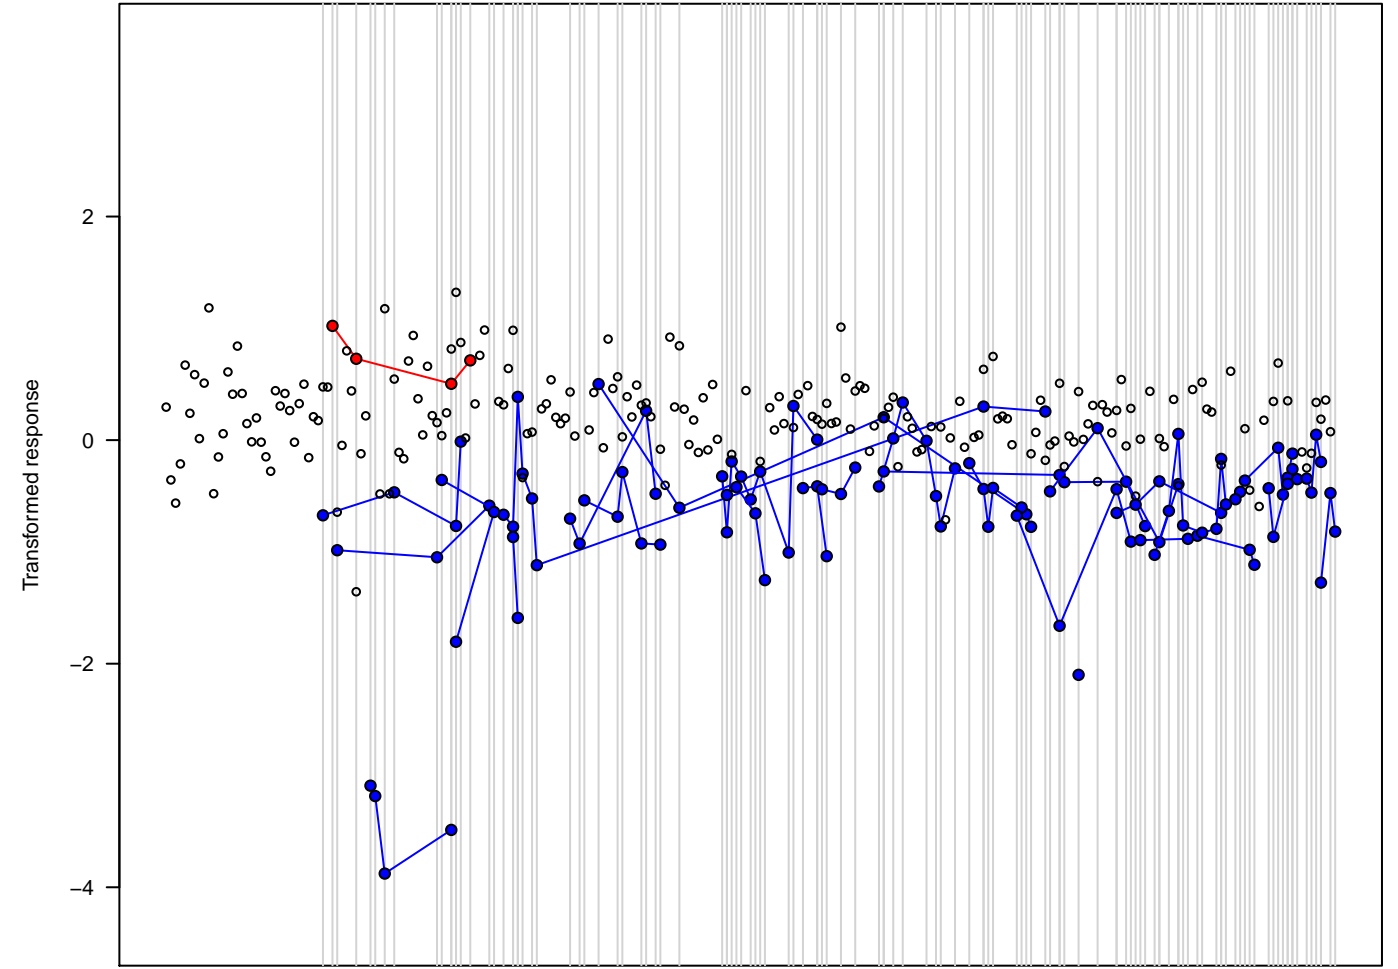

## WTSI

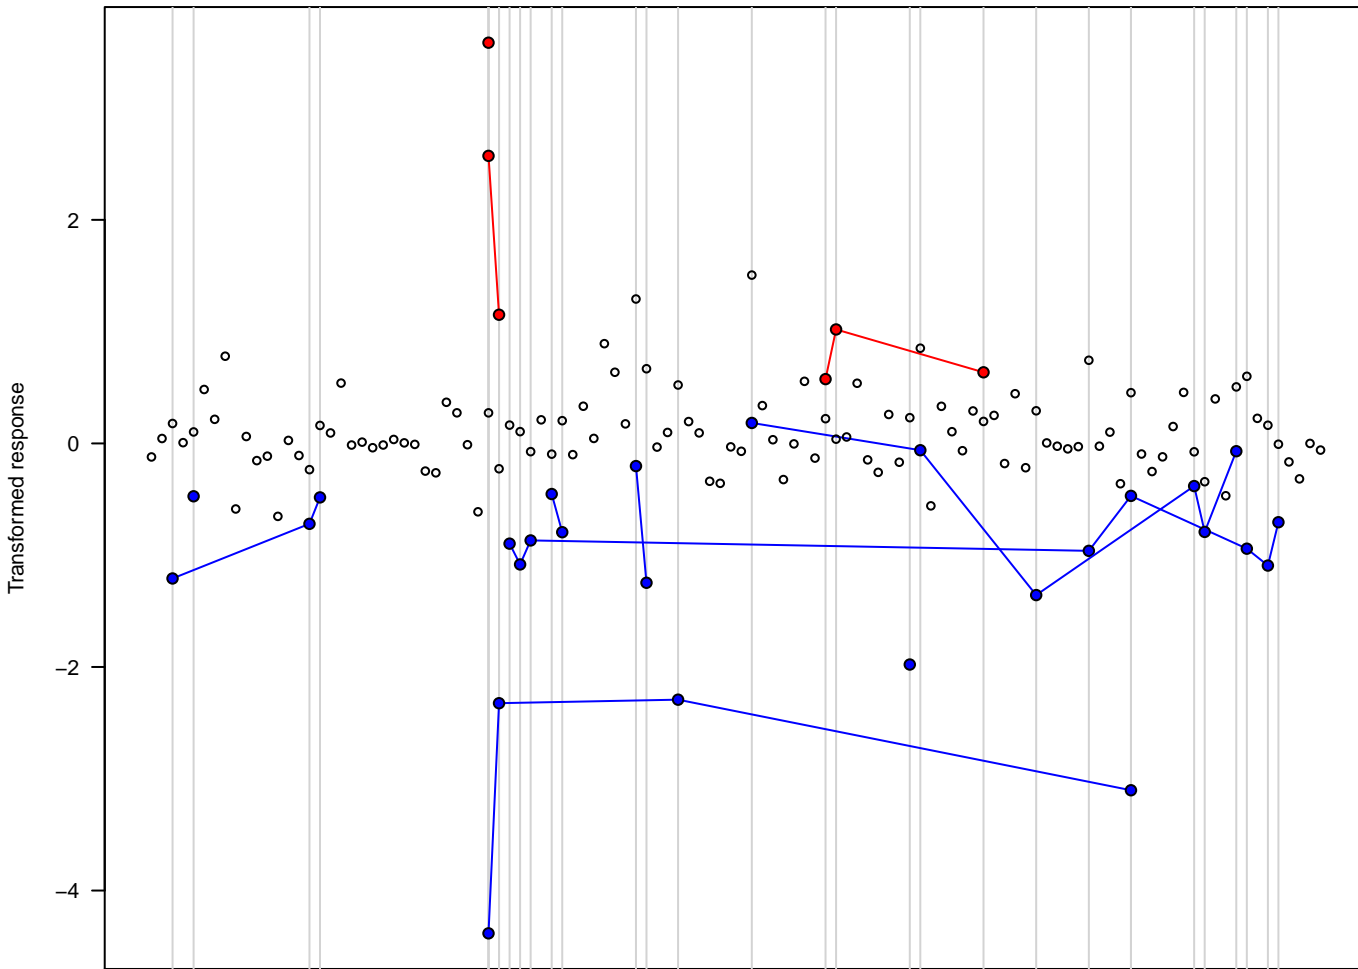

## ICS

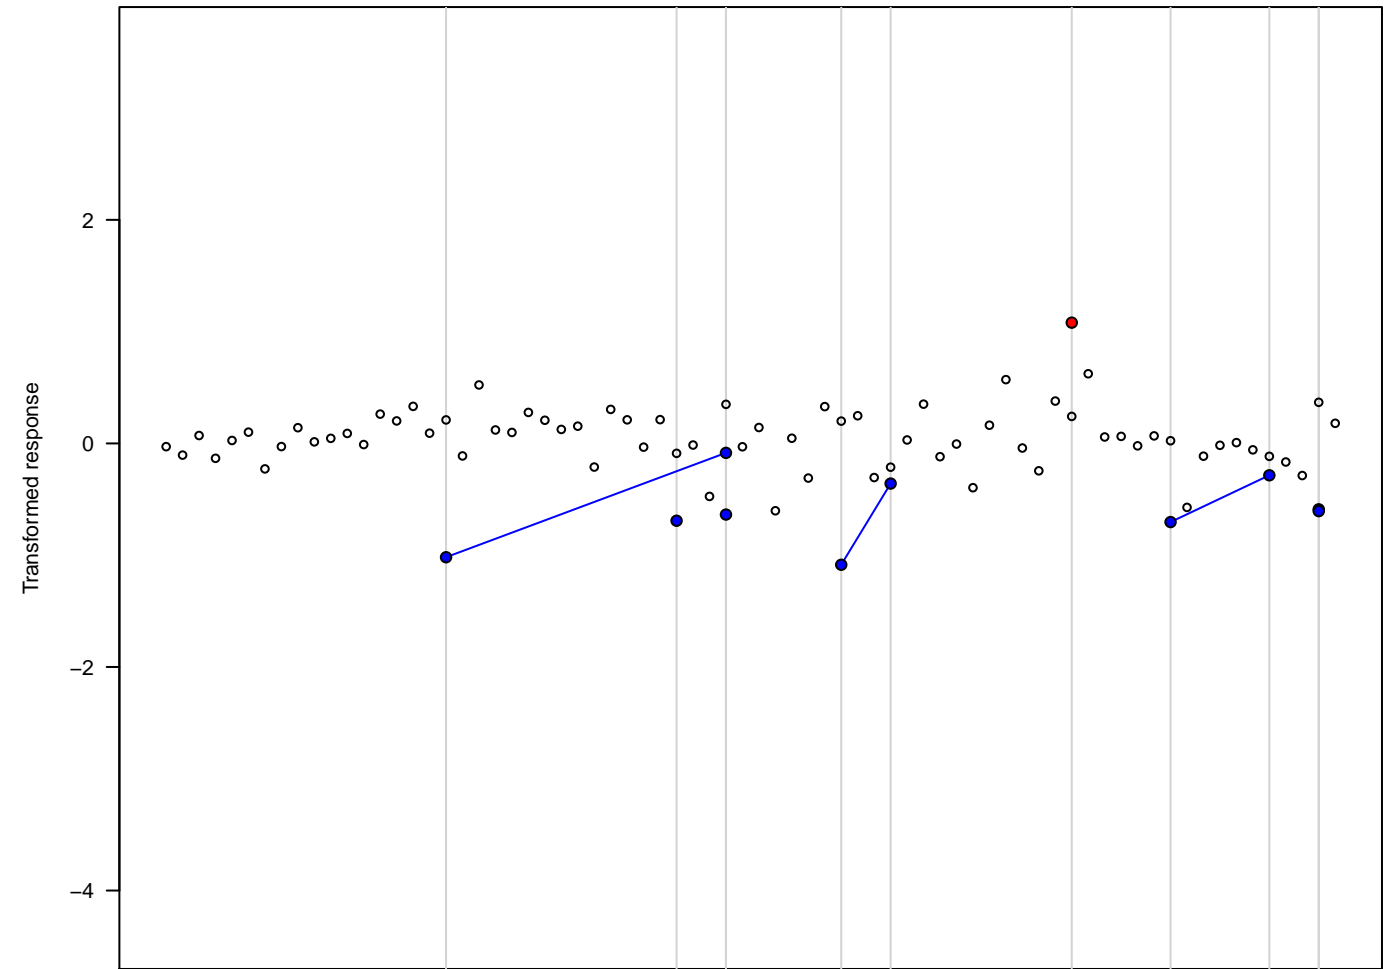



# Rotarod Body Weight (Body Weight)

## HMGU

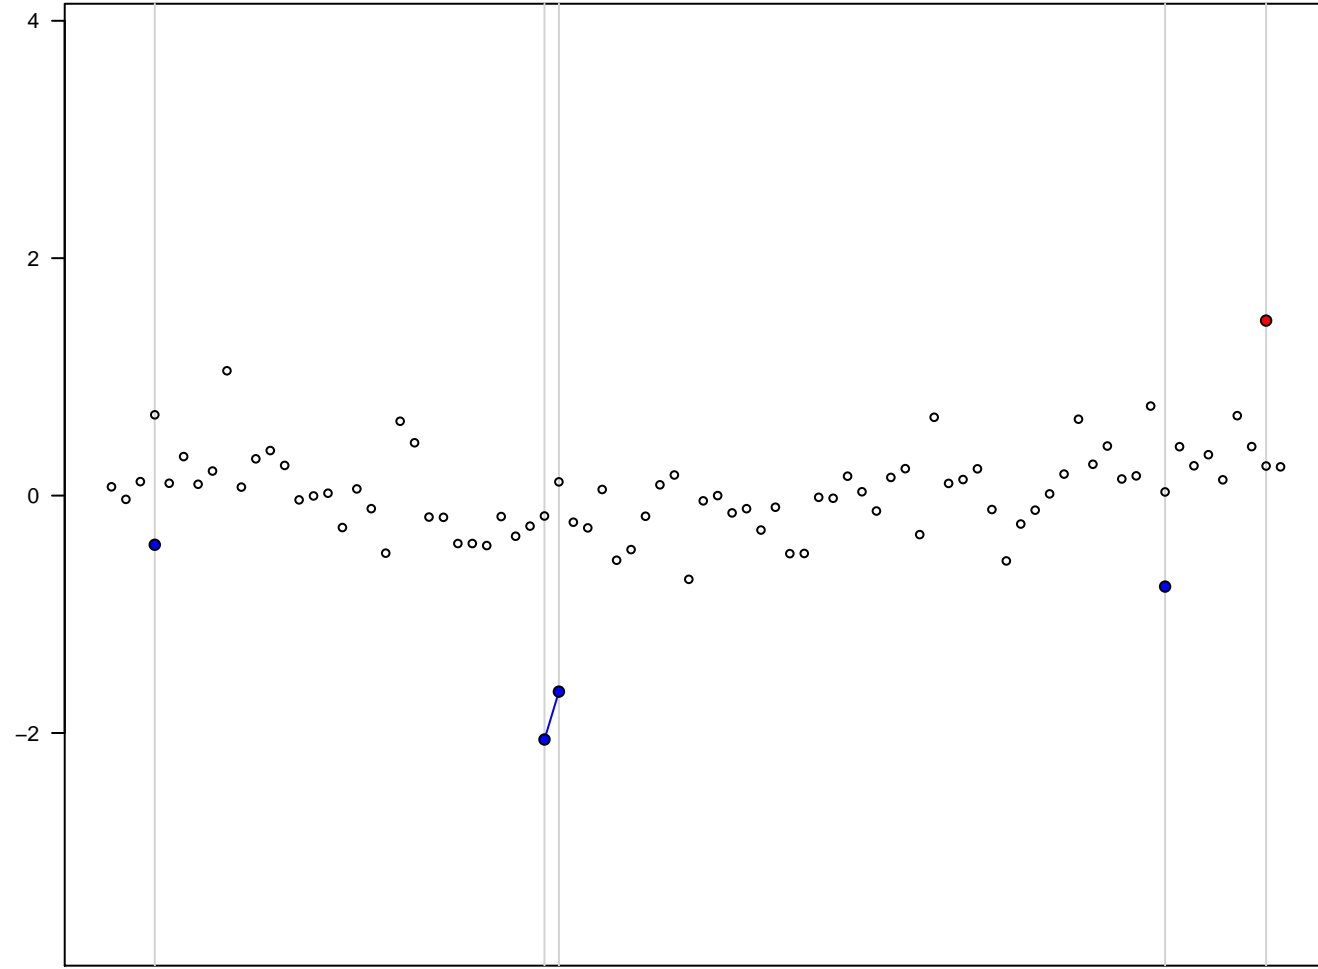

## MRC Harwell

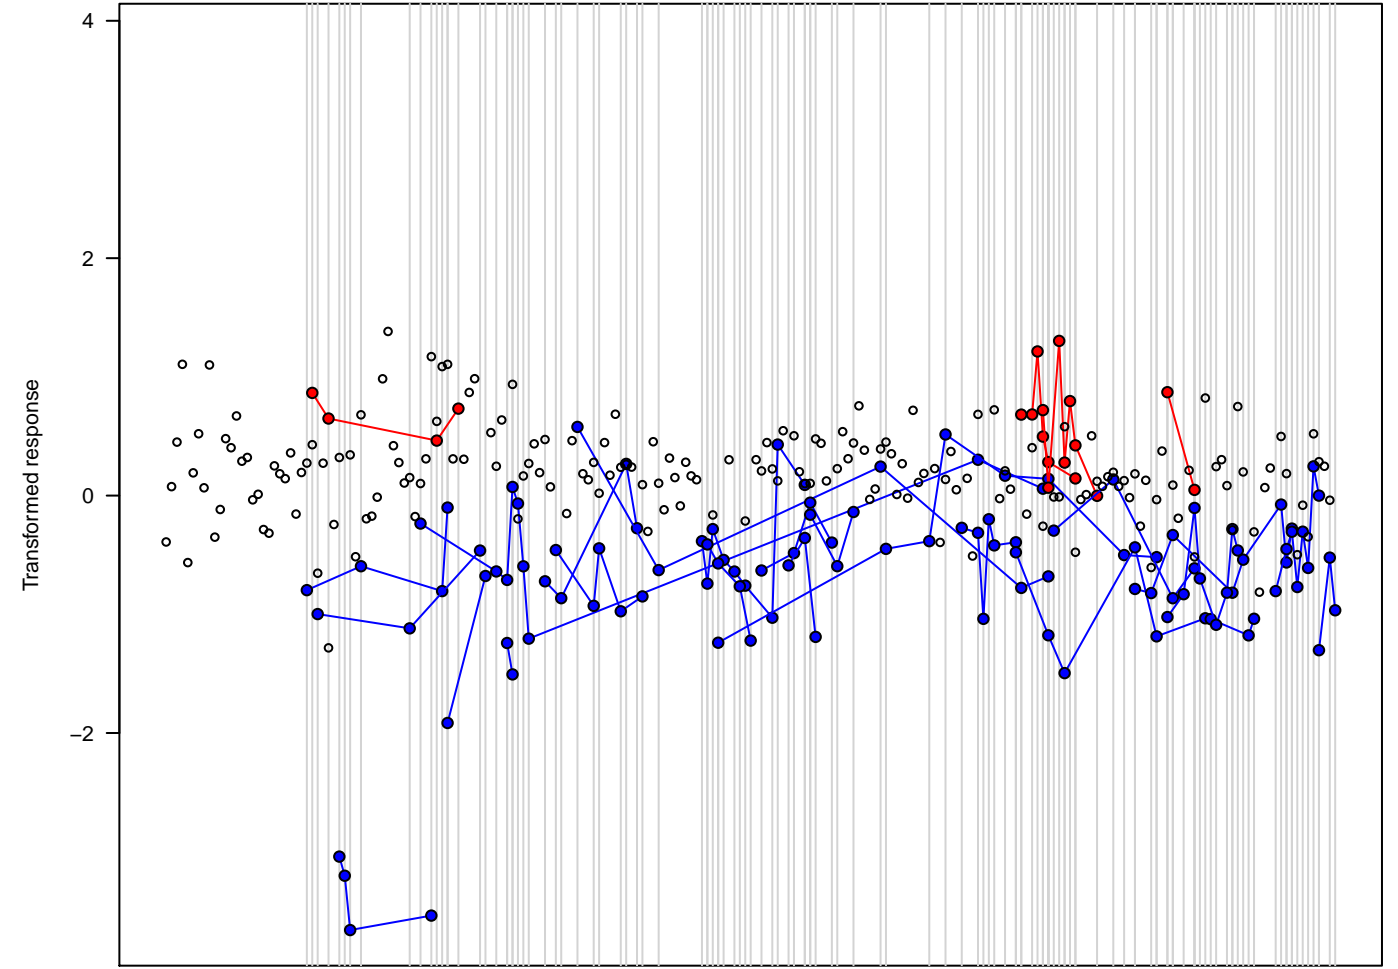

## WTSI

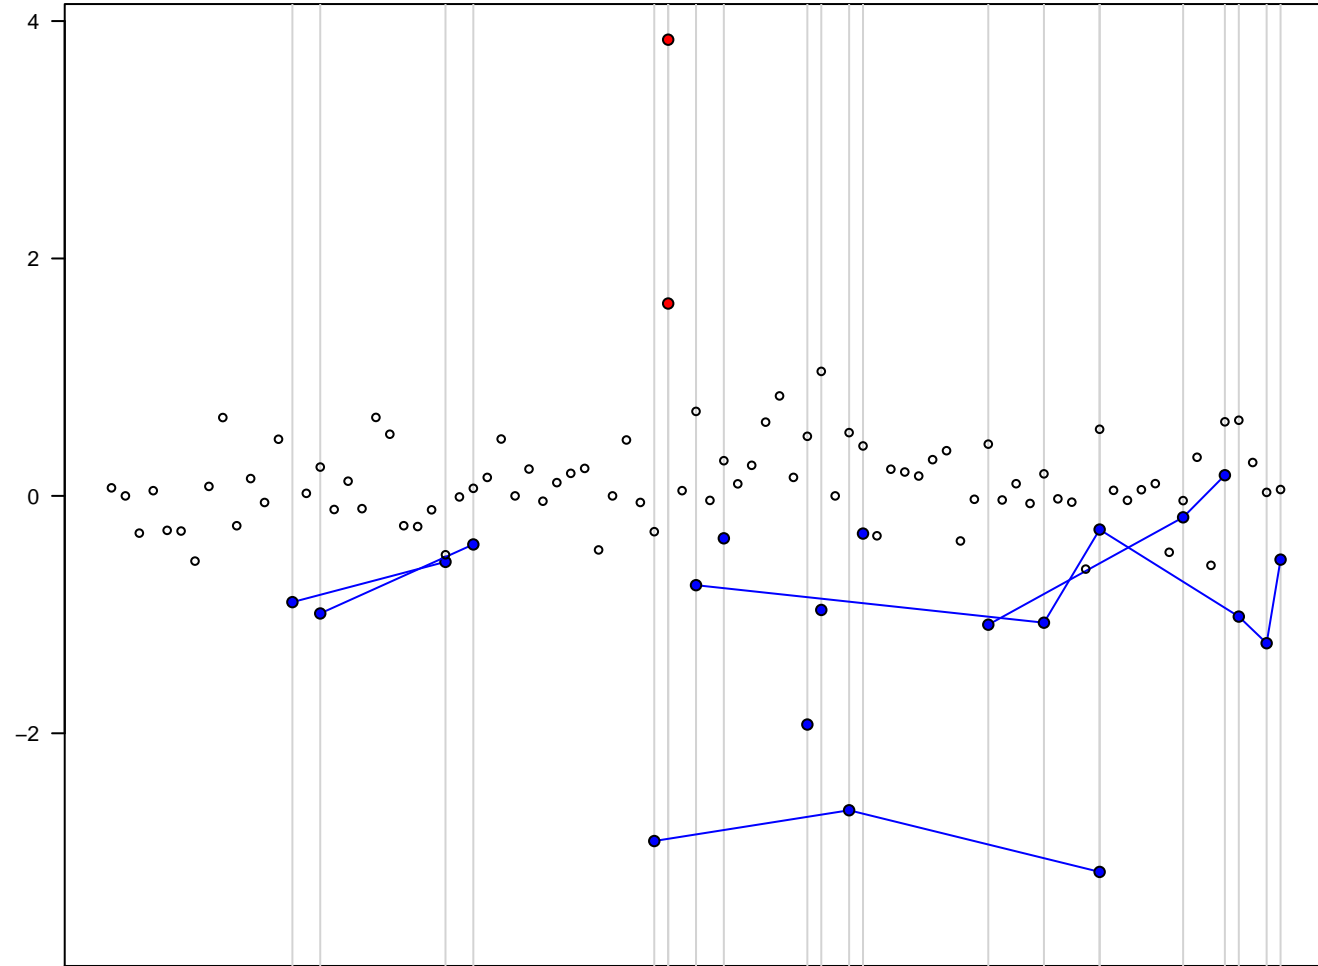

## ICS

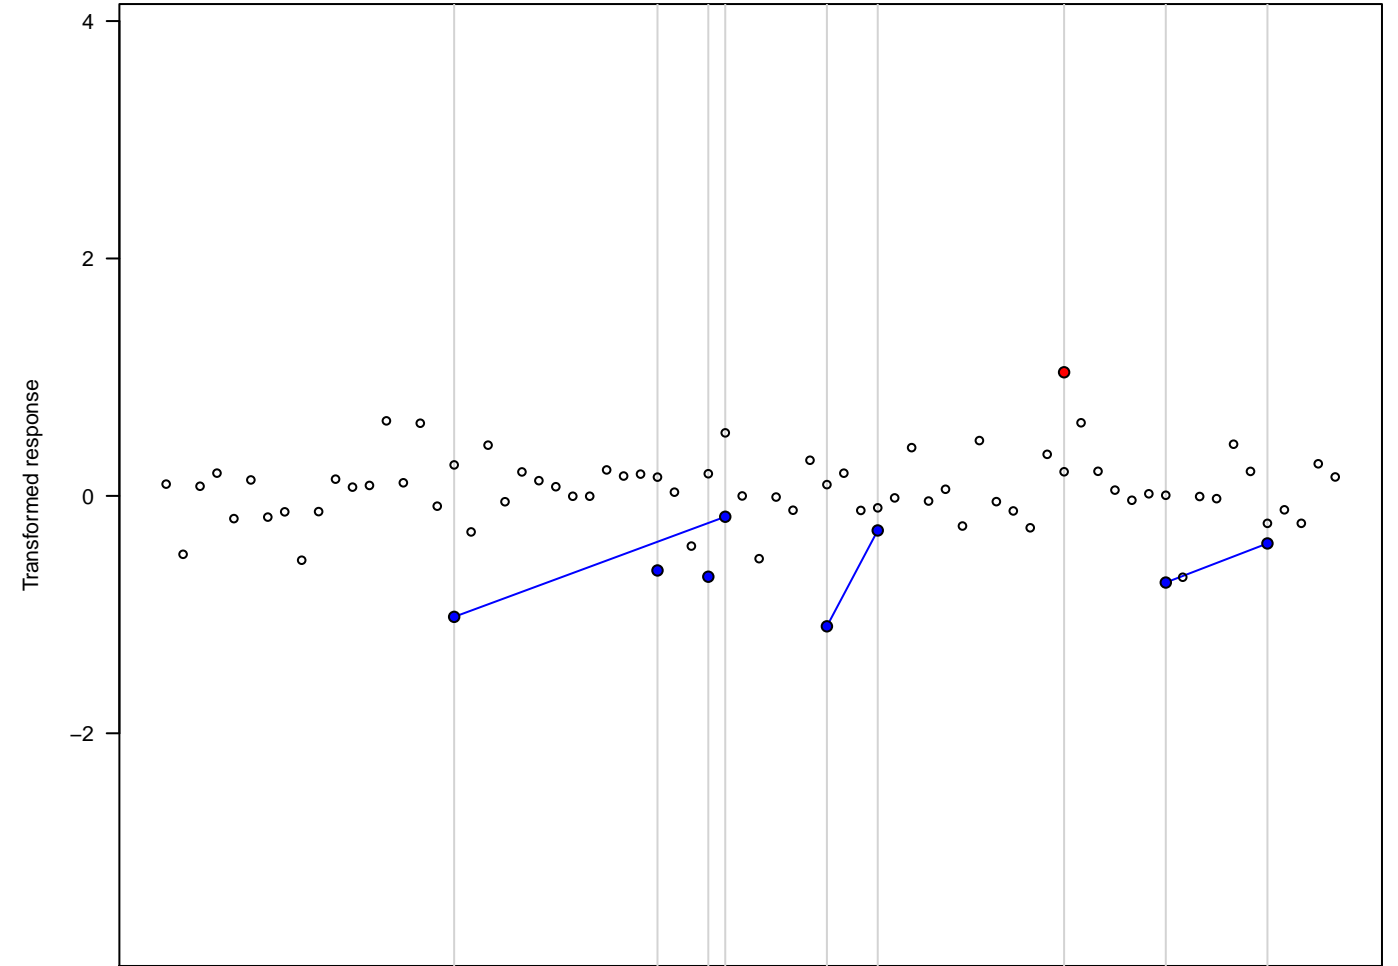

# Acoustic Startle & PPI Body Weight (Body Weight)

## HMGU

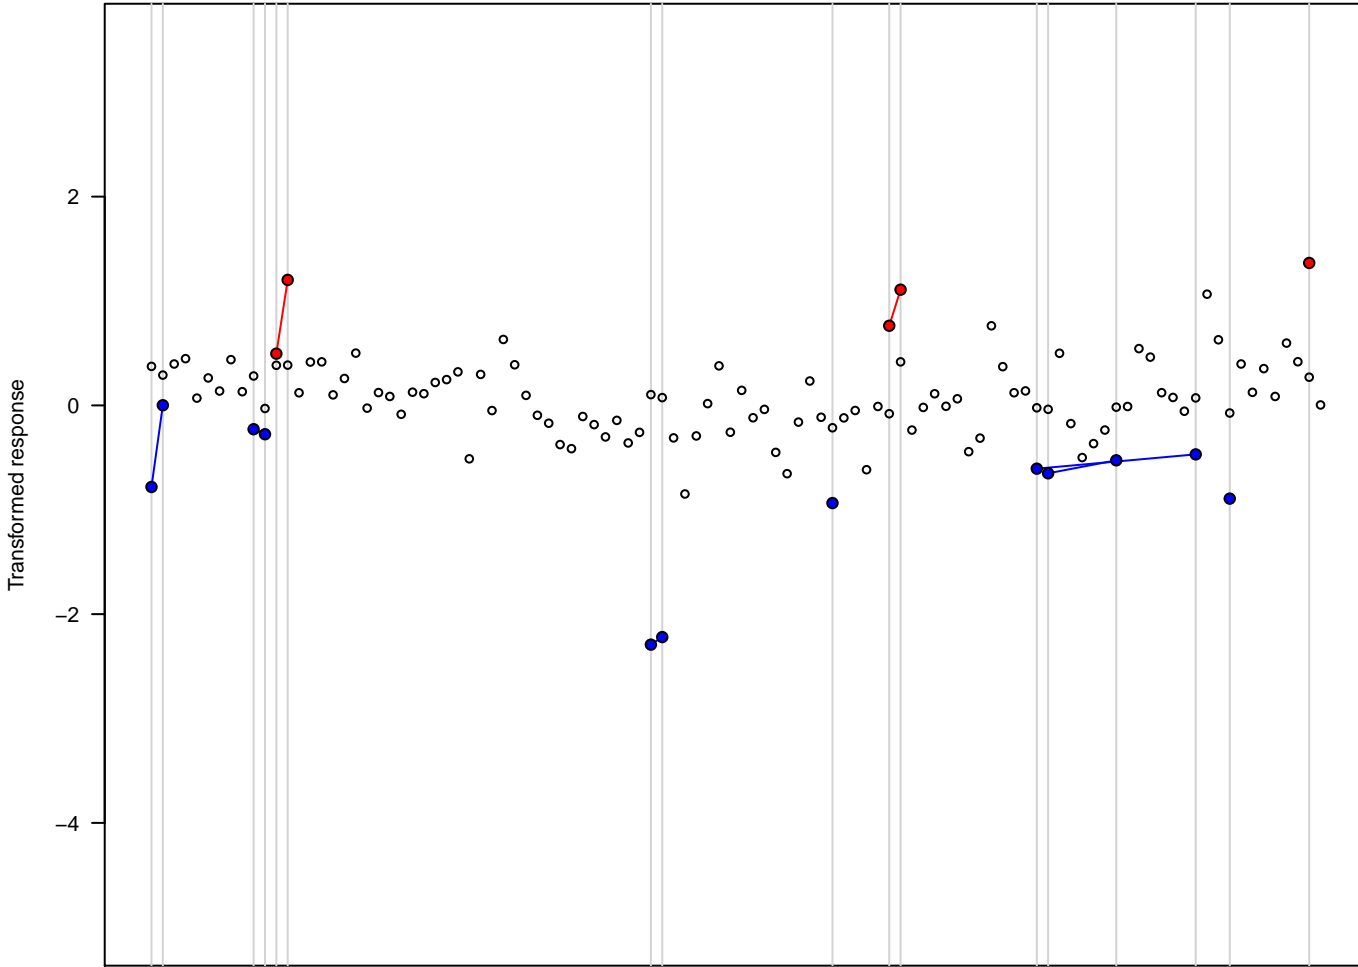

## MRC Harwell

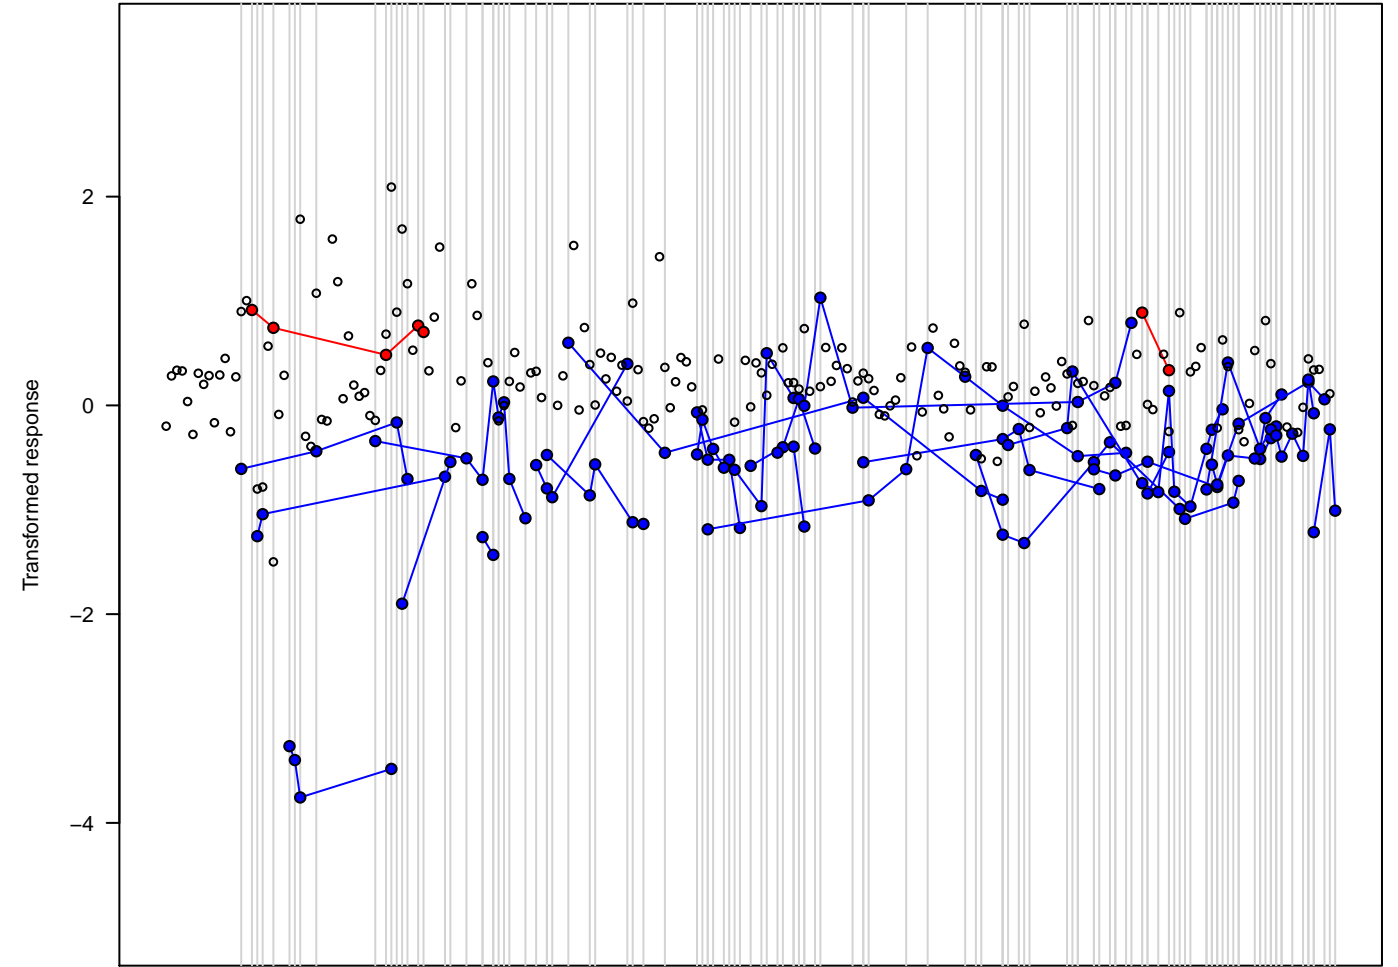

## WTSI

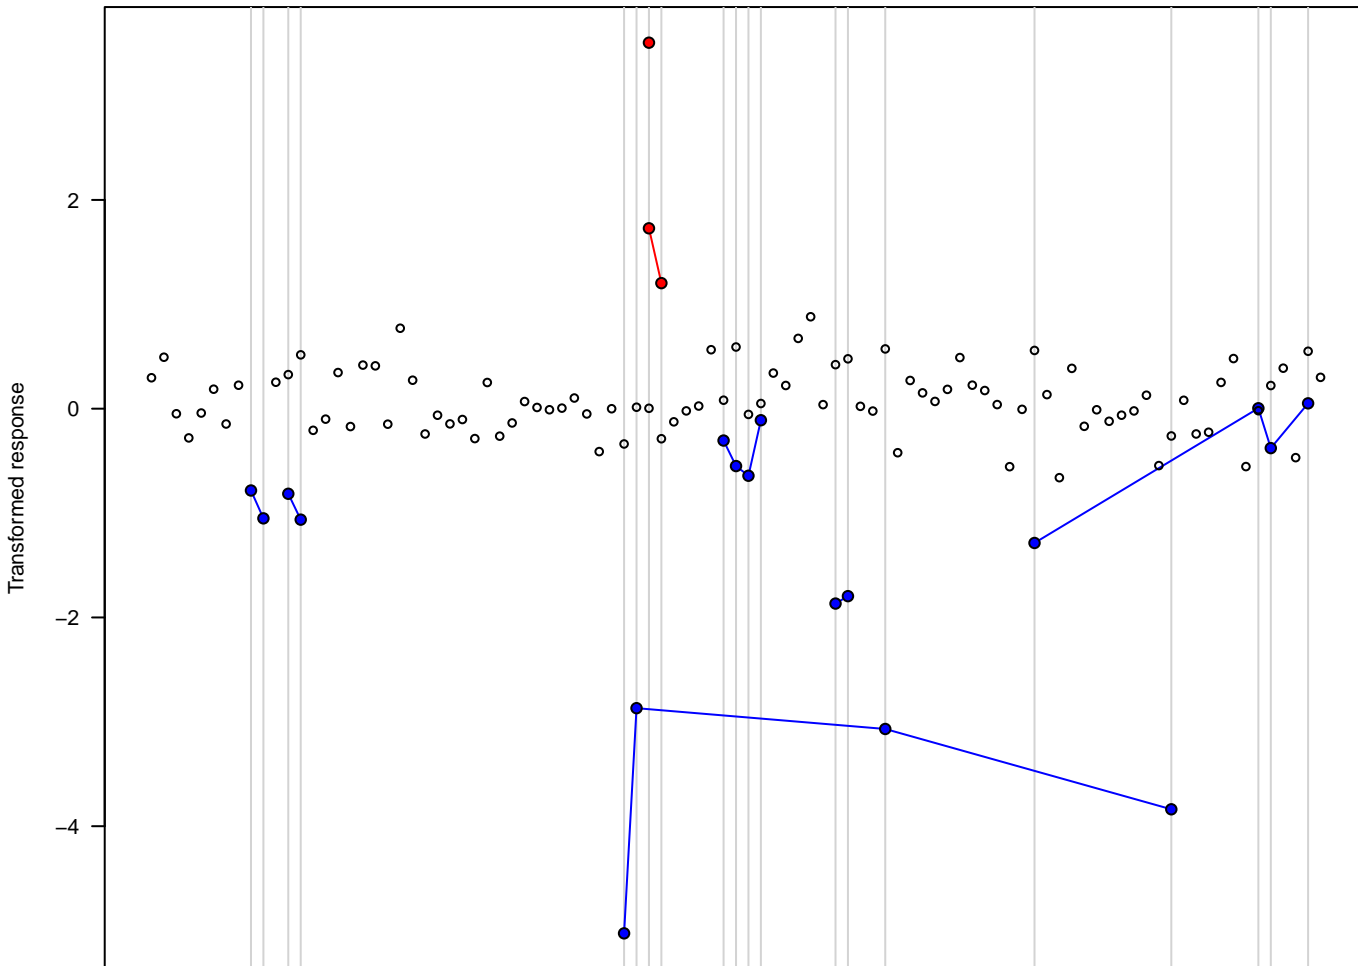

## ICS

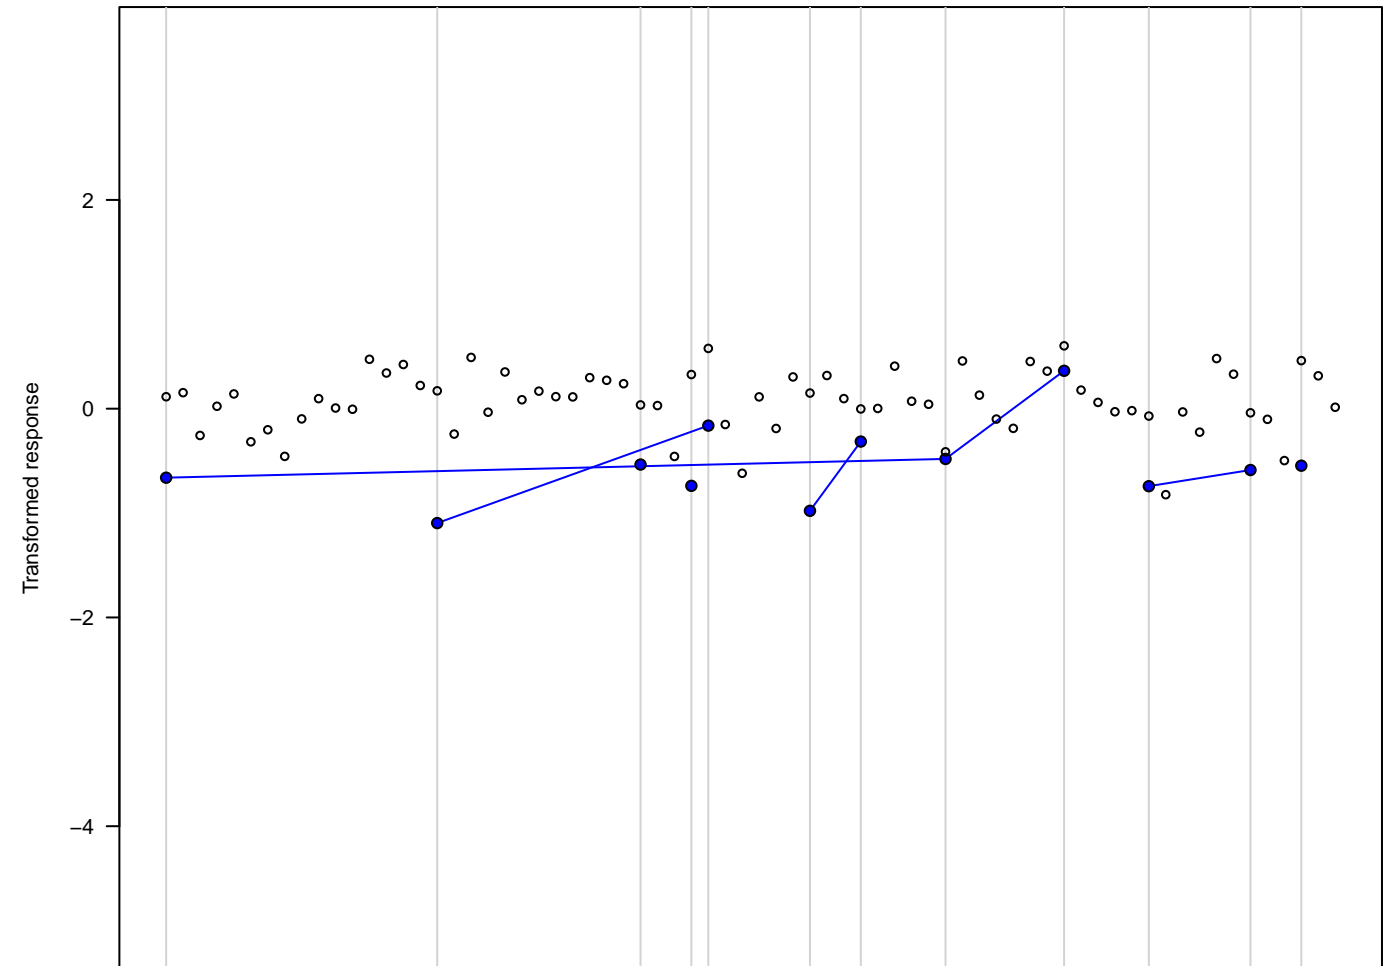

# Hot Plate Body Weight (Body Weight)

## HMGU

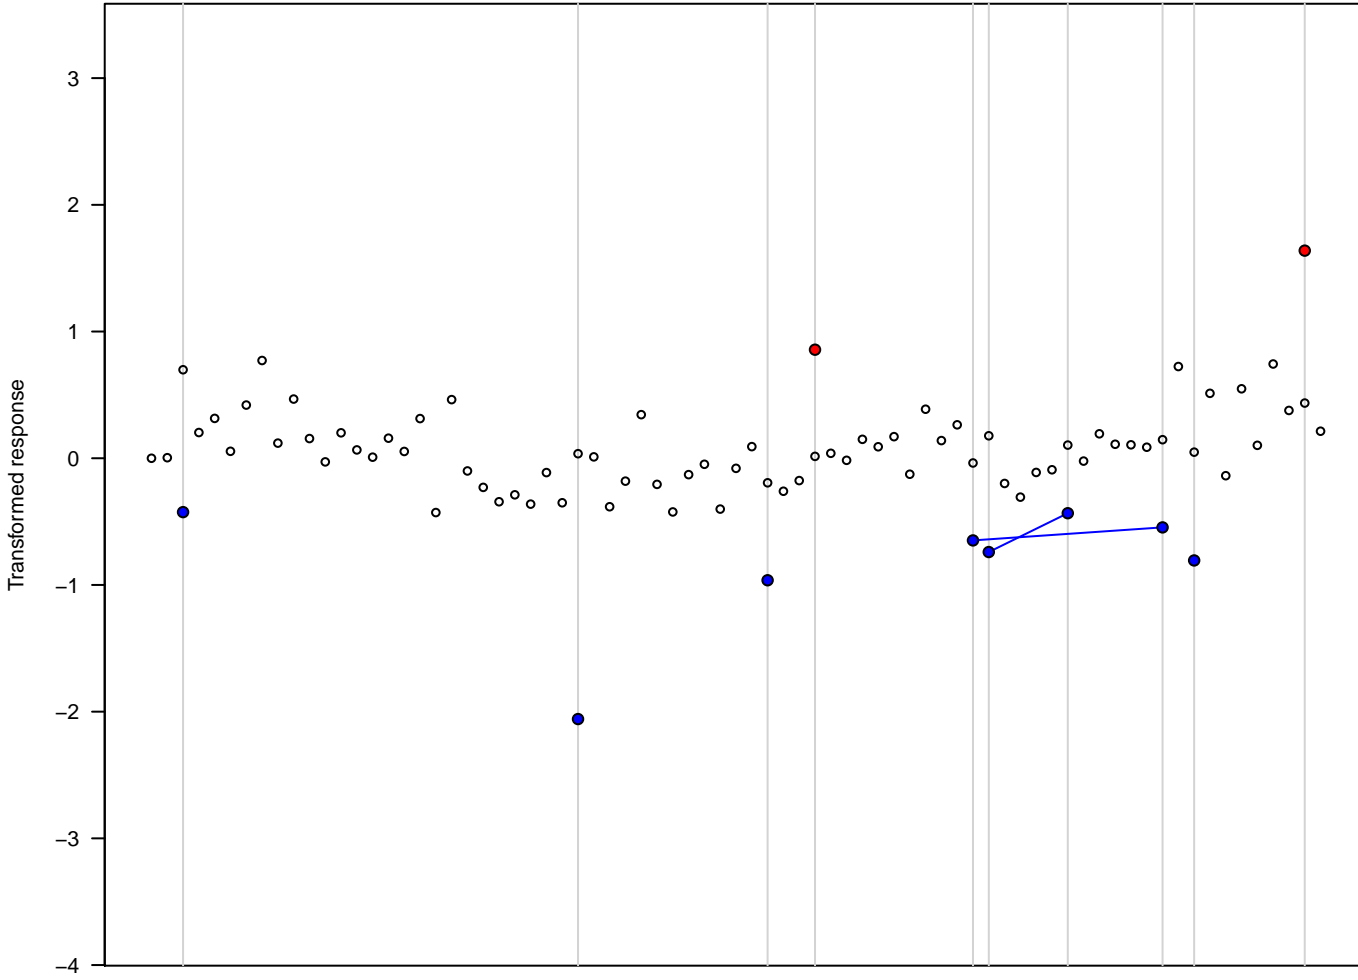

## MRC Harwell

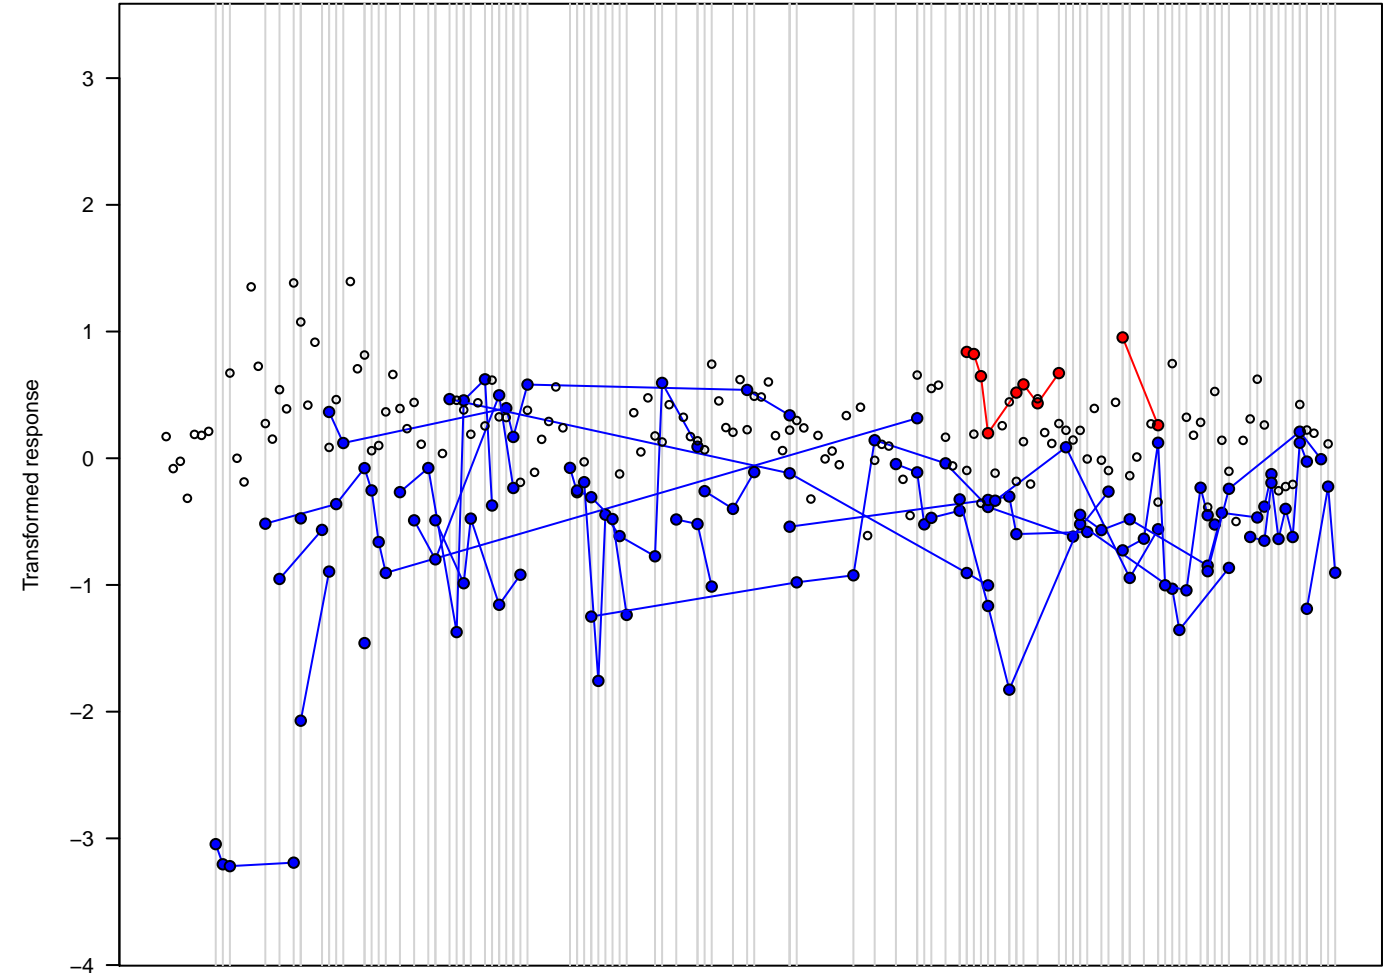

## WTSI

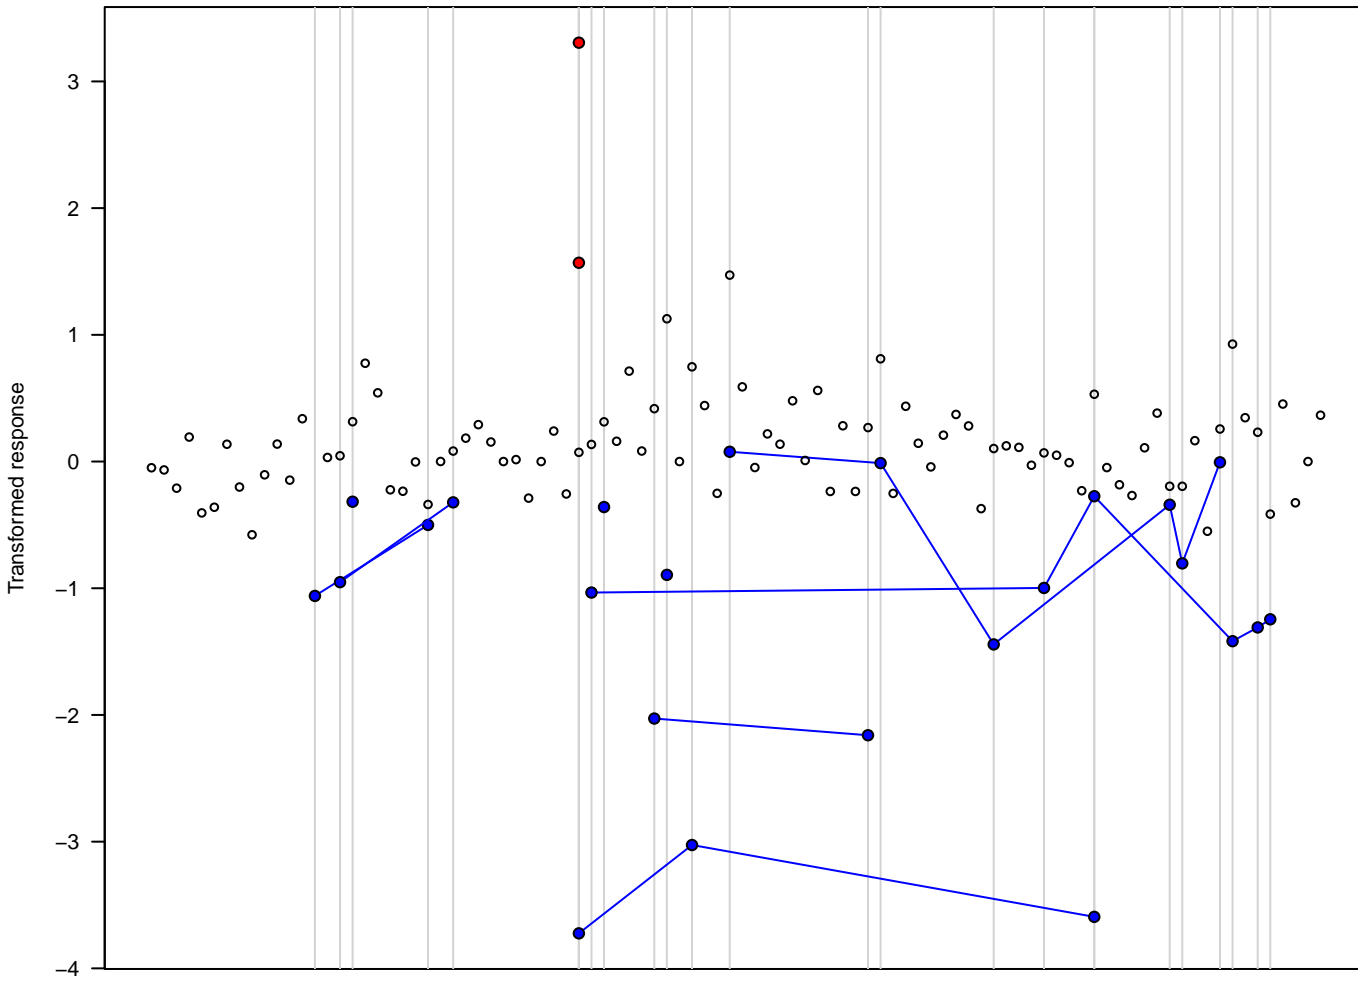

## ICS

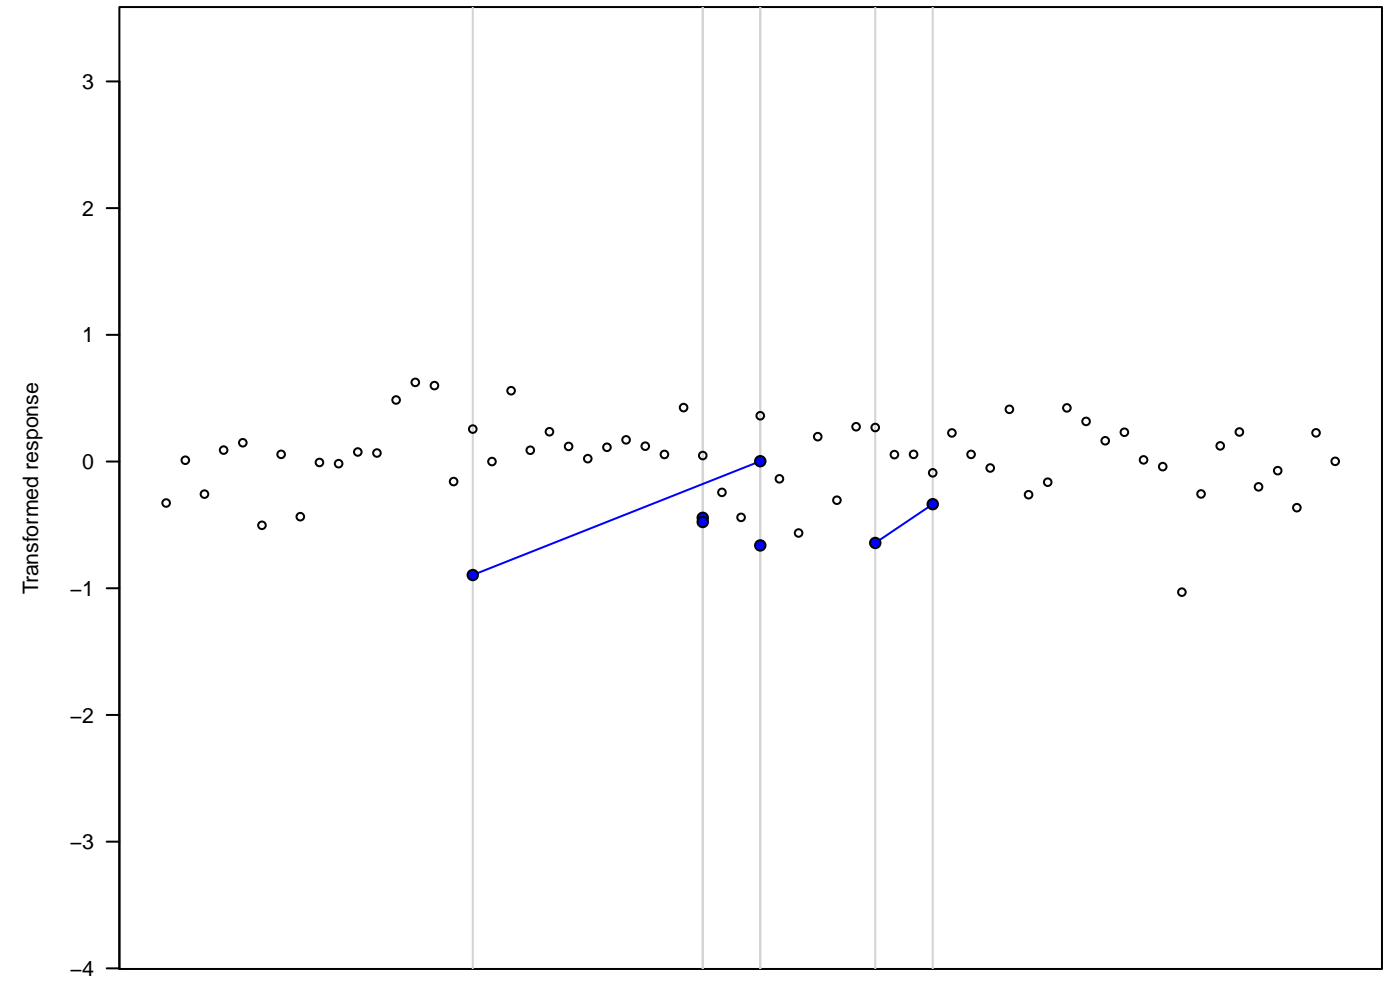

# Ophthalmoscope Body Weight (Body Weight)

## HMGU

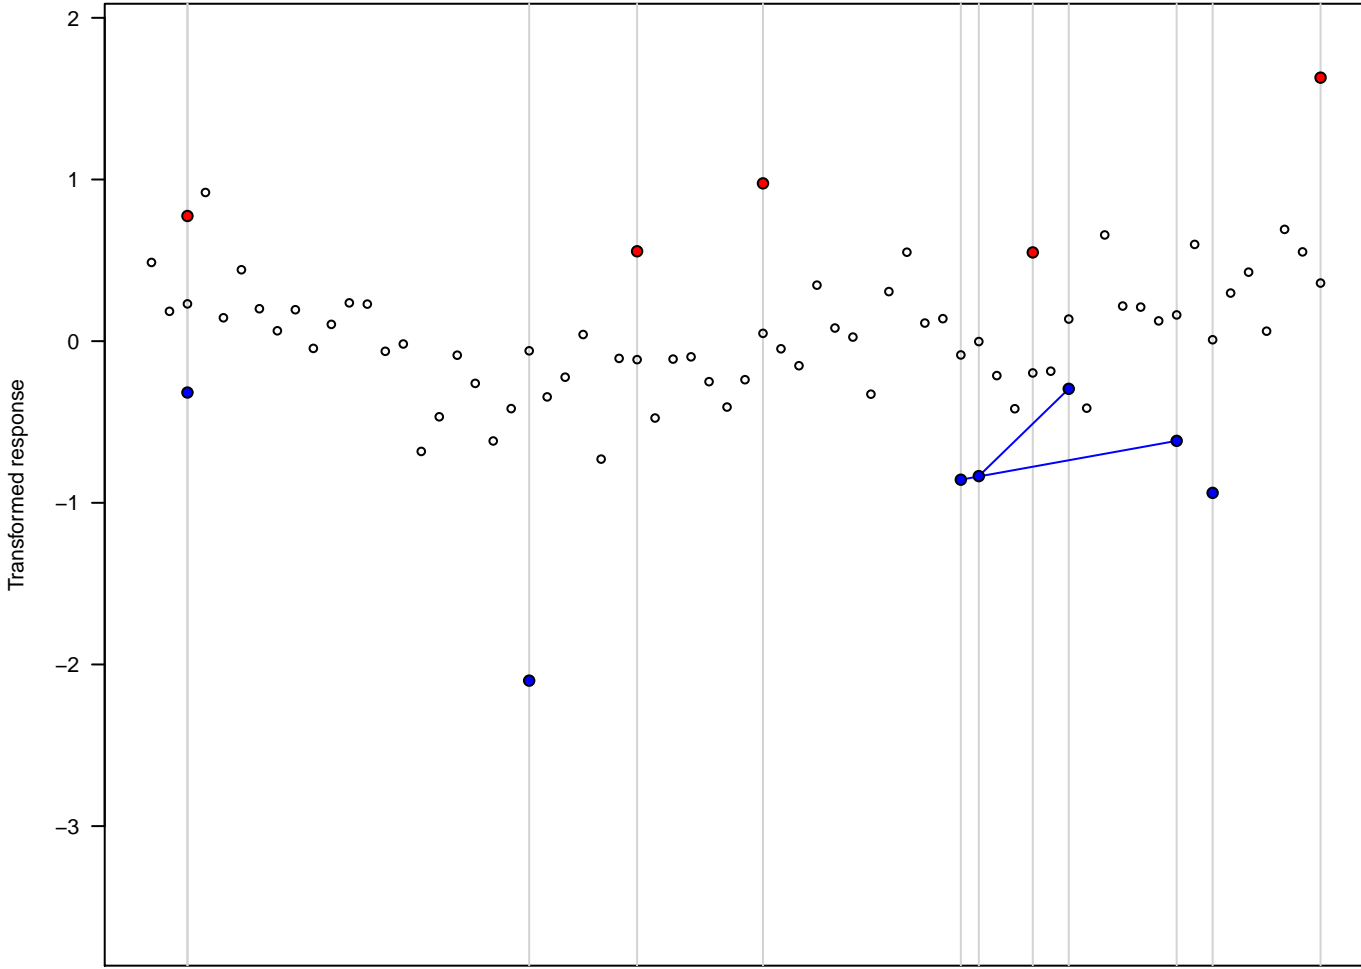

## MRC Harwell

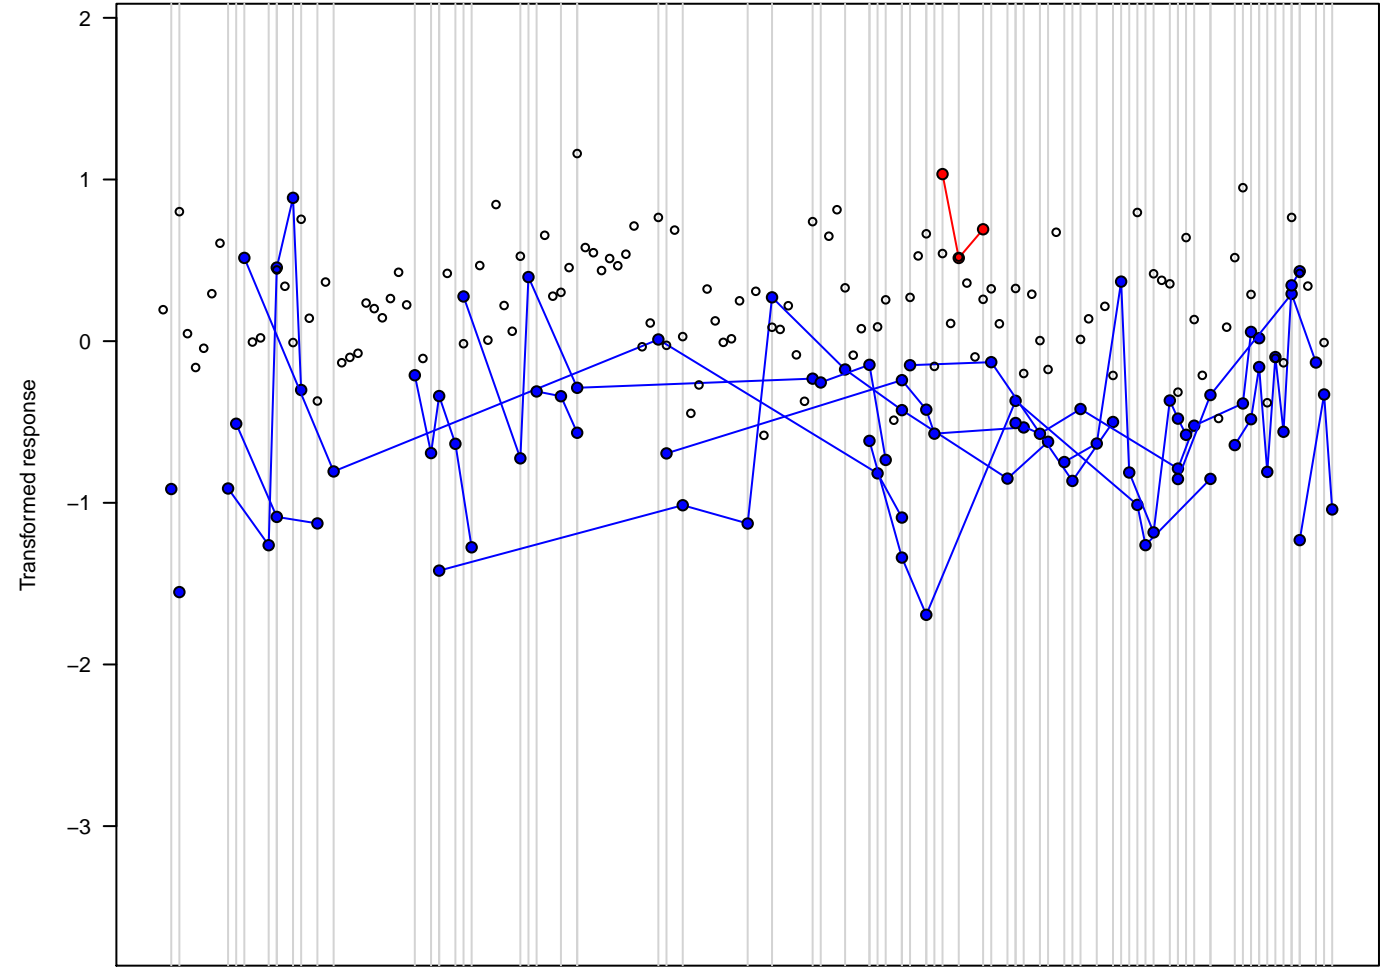

## WTSI

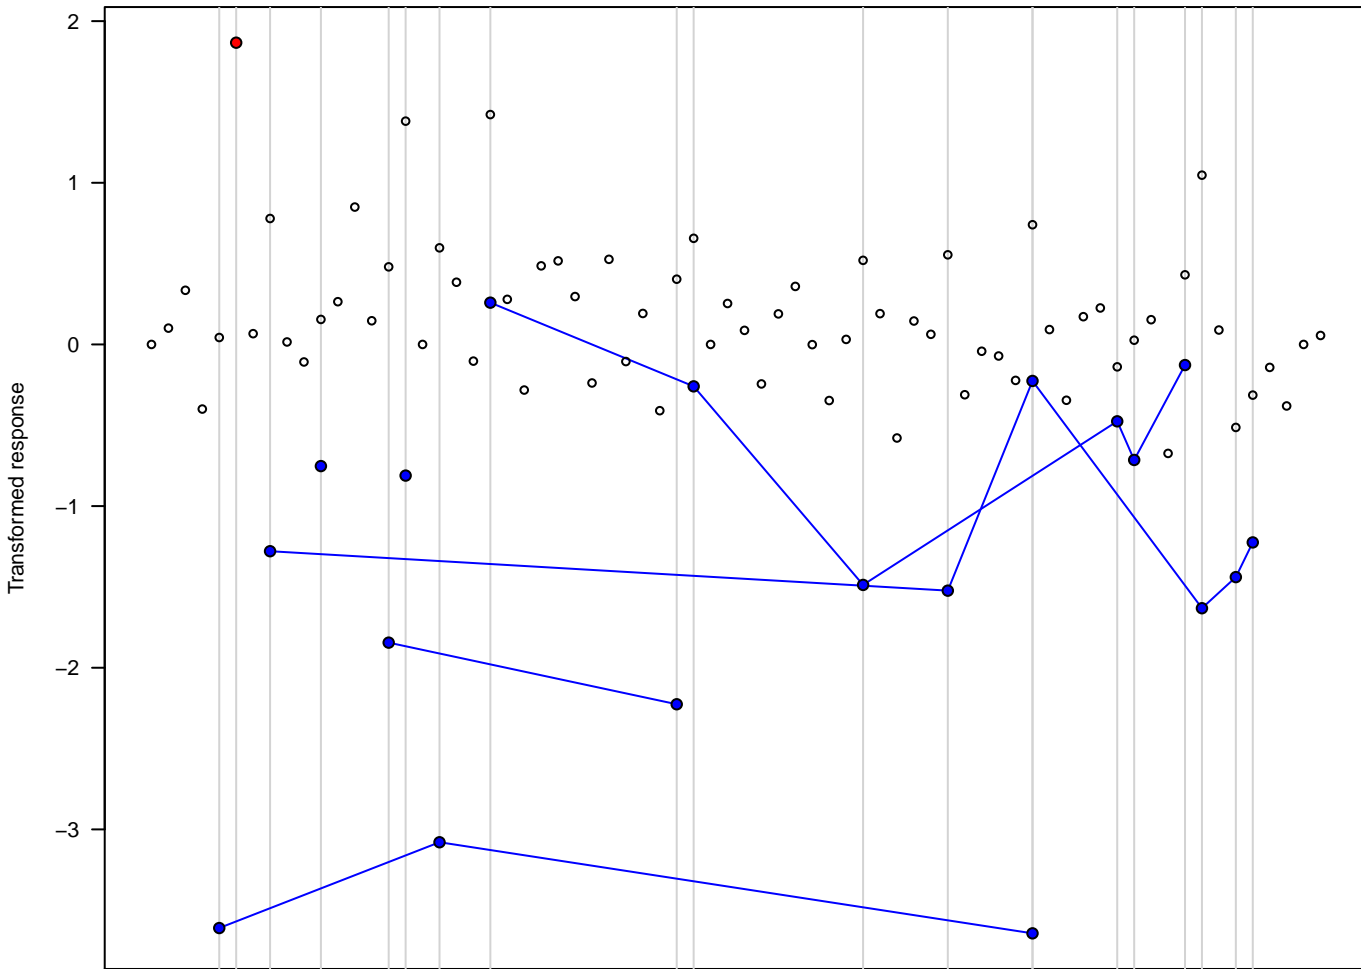

## ICS

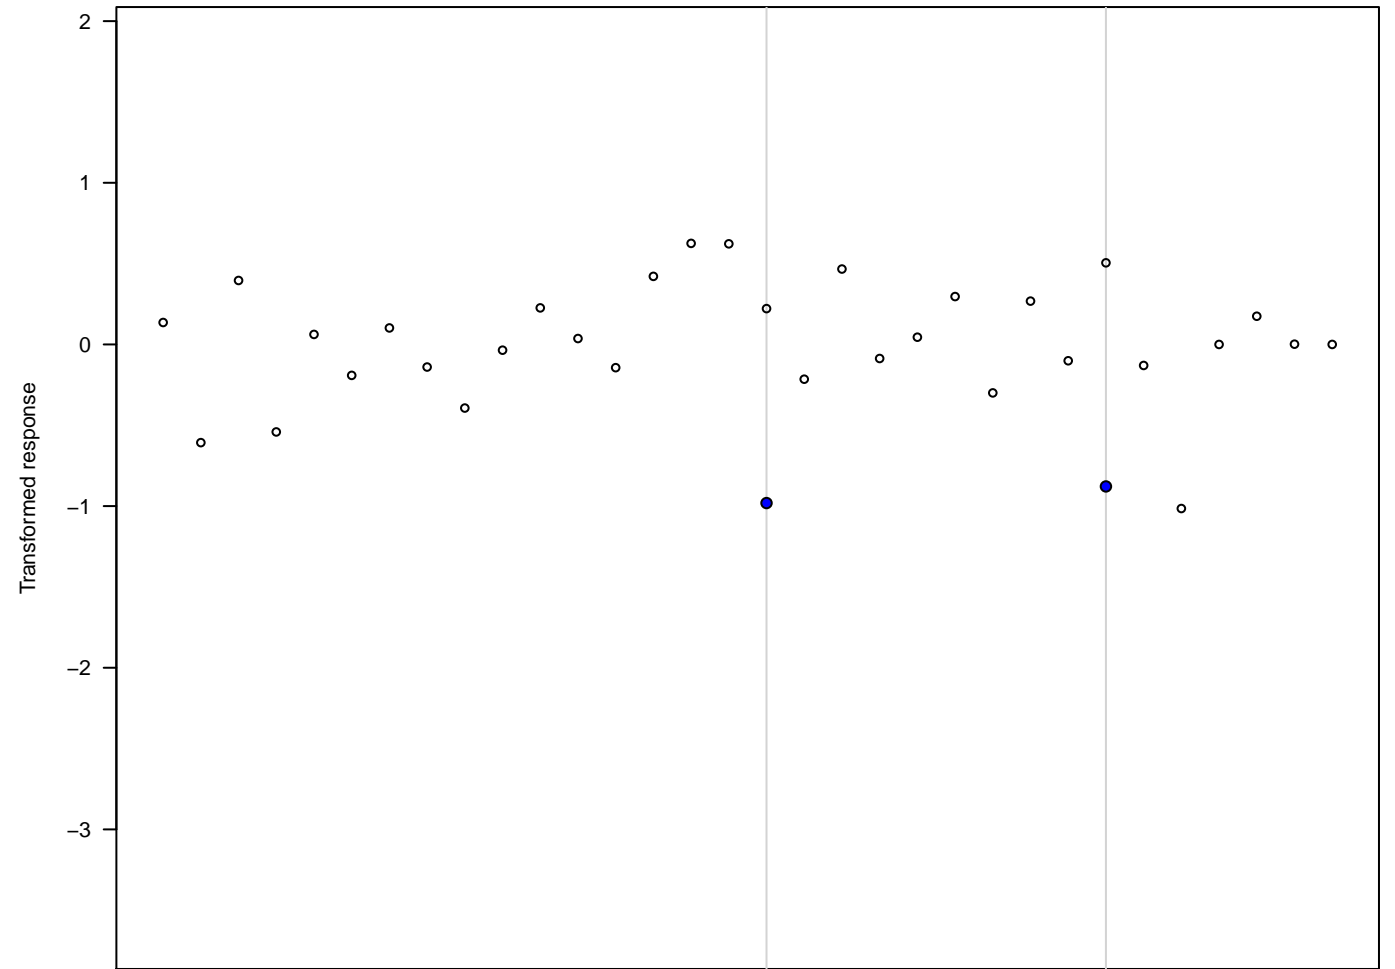

Supplement: NIHMS64750-supplement-1.pdf [file NIHMS64750-supplement-1.pdf]
